# Supplementary material
Source: PubMed Central journal article supplement (PMC7863017)
Supplement: jamaoncol-e207589-s001.pdf [file jamaoncol-e207589-s001.pdf]

---

1 This supplement file contains the following items: the Precise statistical analysis  
2 plan, the original PRECISE protocol, (version 1), and 4 amended protocols (versions  
3 2-5). A summary of the amendments precedes each version of the protocol.  
4 Note Amendment 1 relates to Protocol version 2, etc.  
5 Note the original statistical analysis plan was not amended and was the plan used for  
6 the final analysis.

7

8 Pages are as follows:

9

10 2 Statistical Analysis Plan  
11 10 Original Protocol (version 1)  
12 101 Summary of amendment 1  
13 102 Version 2 of Protocol  
14 194 Summary of amendment 2  
15 195 Version 3 of protocol  
16 285 Summary of amendment 3  
17 286 Version 4 of protocol  
18 382 Summary of amendment 4  
19 384 Version 5 of protocol

20

21 Laurence Klotz

22

23

24

25

26

27

28

---

29 **Study:** A phase III Multi-Centre Open-Label Randomized Controlled Trial of Multi-  
30 Parametric Magnetic Resonance Imaging (MRI)-Targeted Biopsy Compared to  
31 Systematic Trans-Rectal Ultrasound (TRUS) Guided Biopsy for the Diagnosis of  
32 Prostate Cancer in Men without Prior Biopsy (**PRECISE**)

33

34

35

**Statistical Analysis Plan (SAP)**

36

37

**Version:** Draft #1

38

39

40

**Date:** 26 February 2016

41

42

**Author:** Gregory R. Pond

43

44

45

46

47

48

49

50

---

51 **OBJECTIVES**

52 **Overall aim**

53 The aim of this study is to assess the efficacy of MRI-targeted biopsy compared to  
54 standard of care systematic TRUS guided biopsy in the detection of clinically  
55 significant and clinically insignificant prostate cancer in men without prior biopsy.

56

57 **Hypotheses**

58 The proportion of men with clinically significant cancer detected by MRI-targeted  
59 biopsy will be no less than that detected by systematic TRUS guided biopsy.

60

61 **Primary Objective**

62 To determine whether the proportion of men with clinically significant cancer  
63 (Gleason  $\geq 7$ ) detected by MRI-targeted biopsy is no less than systematic TRUS  
64 guided biopsy.

65

66 **Secondary Objectives**

- 67 1. To determine whether the proportion of men with clinically significant cancer  
68 (Gleason  $\geq 7$ ) detected by MRI-targeted biopsy is greater than systematic TRUS  
69 guided biopsy.
- 70 2. Proportion of men in each arm with clinically insignificant cancer detected.
- 71 3. Proportion of men in each arm with Gleason  $\geq 4+3$  detected.
- 72 4. Proportion of men in MRI arm who avoid biopsy.
- 73 5. Proportion of men in the MRI arm whom the PI-RADS score for suspicion of  
74 clinically significant cancer was 3, 4 or 5 but no clinically significant cancer was  
75 detected.
- 76 6. Proportion of men in each arm who go on to definitive local treatment (e.g. radical  
77 prostatectomy, radiotherapy, brachytherapy) or systemic treatment (e.g. hormone  
78 therapy, chemotherapy).
- 79 7. Maximal cancer core length of the most involved biopsy core (maximum cancer  
80 core length, MCCL) in each arm.
- 81 8. Total contiguous cancer core length of the most involved biopsy core (maximum  
82 cancer core length, CMCL) excluding intervening normal regions.
- 83 9. Proportion of men with a negative MRI who develop a positive MRI and/ or

- 
- 84 Gleason  $\geq 7$  cancer by 2 years.
- 85 10. Proportion of men with post-biopsy adverse events
- 86 11. Health-related quality of life scores.
- 87 12. Proportion with Gleason grade upgrading in men undergoing radical
- 88 prostatectomy.
- 89 13. To determine the cost per diagnosis of cancer.
- 90

### 91 **Explanation for non-inferiority hypothesis**

92 Due to the putative advantages of MRI-TB in reducing the number of men who

93 require a biopsy, reducing the number of cores required in each man who is

94 biopsied, more accurate representation of disease burden, less insignificant disease

95 detected and reducing the number of men at risk of complications of biopsy, the

96 primary outcome of detection of clinically significant cancer in each arm will be

97 compared using a non-inferiority hypothesis. Even if a similar amount of clinically

98 significant cancer is identified by MRI-TB to systematic TRUS guided biopsy, these

99 advantages would support the use of MRI-TB instead of systematic TRUS guided

100 biopsy in clinical practice.

101

### 102 **STUDY POPULATIONS**

103 The per protocol population will consist of all subjects who satisfy all eligibility

104 criteria and are randomized to the study, who undergo MPMRI-TB or systematic

105 TRUS guided biopsy and have their primary outcome measured.

106

107 The intent-to-treat (ITT) population will consist of all subjects randomized to the

108 study, regardless of any protocol violations or if they do not complete the study as

109 defined in the protocol.

110

### 111 **DEFINITIONS**

#### 112 **Primary Outcome**

113 The proportion of men in each arm with clinically significant cancer (Gleason  $\geq 7$ ) will

114 be calculated based on histology results from biopsy procedures. The proportion

115 within each arm will be calculated as the number of patients with clinically

116 significant cancer divided by the number of evaluable patients.

---

117

118 **Secondary Outcomes**

119 Standard summary statistics will be presented for secondary outcomes. For  
120 continuous variables, summary statistics will include n, mean, standard deviation,  
121 median, interquartile range, minimum and maximum. For categorical variables,  
122 proportions and frequencies will be presented. Time to cancer diagnosis or death,  
123 and time to first intervention will be collected and estimated using the Kaplan-Meier  
124 method.

125

126 **STATISTICAL METHODS**

127 **Primary Analysis**

128 Absolute differences in the proportion of clinically significant cancer detected  
129 between arms will be calculated and compared using the Clopper-Pearson method.  
130 If the lower boundary of an one-sided, 97.5% confidence interval for the difference  
131 in detection rates of MPMRI-TB compared to systematic TRUS guided biopsy is less  
132 than -5% then MPMRI-TB will be deemed non-inferior. In the event that the lower  
133 bound is greater than zero, superiority can be claimed.

134

135 A supportive analysis will be performed by using a logistic regression model,  
136 evaluating the odds ratio for detecting high grade cancers, adjusted for stratification  
137 factors. MRI-guided biopsy would be considered non-inferior if the lower bound of  
138 the two-sided, 95% confidence interval for the odds ratio exceeds 0.78. This lower  
139 bound was calculated to approximate an absolute 5% difference of interest (NOTE:  
140 the unadjusted odds ratio is 0.78 when treatment A is 30% and treatment B is 25%).

141

142 **Secondary Analyses**

143 For each secondary outcome, where appropriate, a difference in proportions with  
144 95% CI, or a difference in means with 95% CI, as appropriate, will be presented.  
145 Differences in the 1-year and 2-year rates along with 95% CI will be calculated for  
146 time-to-event outcomes.

147

148  $\chi^2$  tests, t-tests or Wilcoxon rank sum tests, and log-rank tests will be used to test for  
149 differences between allocation arms in secondary outcomes. Logistic regression and

---

150 Cox proportional hazards regression will be used to examine the effect of allocation  
151 arm on outcomes, adjusted for stratification factors. All secondary outcomes will be  
152 two-sided and statistical significance will be set at the  $\alpha=0.05$  level. No statistical  
153 adjustments will be made due to multiple testing, however, results for secondary  
154 outcomes will be interpreted cautiously, acknowledging that tests were performed  
155 on secondary outcomes and numerous secondary tests were performed. Figures and  
156 tables will be used to illustrate results of interest.

157

### 158 **Treatment Allocation and Stratification**

159 Subjects will be allocated to the two allocation arms in an approximate 1:1 ratio by  
160 use of a dynamic allocation scheme. Specifically, the first 20 patients will be  
161 randomly allocated to arm in an approximate 1:1 ratio. After the first 20 patients, a  
162 biased coin method will be used, whereby the number of patients within each  
163 stratum will be calculated, and the next eligible patient will be allocated (with  
164 probability  $p=0.8$ ) to the arm which reduces the imbalance. If no imbalance exists,  
165 allocation to each arm will occur with probability  $p=0.5$ .

166

### 167 Stratification

168 For treatment allocation, the subjects' individualized risk of high-grade prostate  
169 cancer will be determined. Risk will be assessed using the PCPTRC 2.0 calculator,  
170 found at <http://deb.uthscsa.edu/URORiskCalc/Pages/calcs.jsp>. Eligible, consenting  
171 subjects will be stratified by:

172 (1) individualized risk of high-grade prostate cancer (5% to 25%, >25%);

173 (2) clinical centre.

174

### 175 **Sample Size**

176 Rates of clinically significant cancer (Gleason  $\geq 7$ ) detection from targeted-alone  
177 biopsy in a population with no prior biopsy have been shown to be 42% [37] and  
178 50% from another study [36].

179

180 Rates of clinically significant cancer detection from one the largest studies of  
181 systematic TRUS guided biopsy in men without prior biopsy are shown to be 27%  
182 [49]. Therefore, based on these results, it may be assumed that targeted-biopsy will

---

183 detect clinically significant cancer in >15% more men (i.e. 42% versus 27%) than  
184 systematic TRUS guided biopsy.

185

186 For this study, it will be conservatively hypothesized that systematic TRUS guided  
187 biopsy will detect clinically significant cancer in 30% of men, and targeted biopsy will  
188 detect clinically significant cancer in 10% more men (i.e. 40% total) than systematic  
189 TRUS guided biopsy. For the non-inferiority hypothesis, using 90% power and 2.5%  
190 one sided-alpha, assuming a targeted biopsy detection rate of clinically significant  
191 cancer of 40%, and a detection rate for systematic TRUS guided biopsy of 30% and  
192 using a margin of clinical unimportance of 5%, 211 men per arm will be required. The  
193 choice of 5% as the margin of non-inferiority represents a difference that would be  
194 considered clinically important.

195

196 Thus total men required in study = **422**.

197

198 To account potential withdrawal / loss to follow up and the effect of stratification,  
199 the sample size will be inflated by 5%, and a target of **450 men** will be recruited.

200

201 Note that the rate of clinically significant cancers is very dependent on the  
202 population registered for this study. It is possible that fewer (or more) subjects will  
203 have clinically significant cancers than what is initially hypothesized. However, if the  
204 population rate of clinically significant cancers is less (i.e. the systematic TRUS guided  
205 biopsy detection rate is <30%) and other statistical assumptions remain as stated  
206 previously, the statistical power will increase. The minimum statistical power would  
207 be obtained if the clinically significant cancer detection rate was 45% for systematic  
208 TRUS guided biopsy and 55% for targeted biopsy, which would still achieve >84%  
209 power. Therefore, the sample size is sufficient to ensure non-inferiority, even if the  
210 rate of clinically significant cancer in the population is miss-specified, assuming an  
211 absolute difference of 10% between targeted and systematic TRUS guided biopsy  
212 detection rates, and a 5% margin of non-inferiority.

213

---

214 **Statistical Conventions**

215 For categorical data, tables will be presented showing the n and percentage  
216 (n/N\*100%) of patients. Analyses will be presented by study allocation arm  
217 separately.

218

219 Duration of time will be described in either years, months or weeks, and calculated  
220 using: (last date – first date + 1) / X, where X=365.25 for years, X=30.4 for months,  
221 or X=7 for weeks. Example: Age (in years) will be calculated as: (randomization date  
222 – date of birth + 1)/365.25.

223

224 Transformations of the data in order to meet statistical assumptions may be  
225 considered. Type-1 error will be set to 5%. Standard diagnostic tools will be used to  
226 assess any of the model fittings. All the statistical analysis will be carried out using  
227 SAS version-9 and over for Windows (Cary, NC) or R version 3.2.2. (www.r-  
228 project.org) or higher.

229

230 **Missing Data**

231 Missing values for the primary endpoint will be examined closely. Sources and  
232 reasons for the absence of data incurred as a result of subjects lost-to-follow up,  
233 dropouts, and intermittent missing values will be described and explored by various  
234 summary statistics as well as graphical displays between the two allocation arms.  
235 Subjects' lost-to-follow up or dropouts will be explored and the characteristics of  
236 those subjects will be described by allocation arm and tested using Fisher's exact  
237 tests or Wilcoxon rank sum tests.

238

239 Missing data for secondary endpoints will be described. The methods for evaluating  
240 missing data of the primary endpoint may be employed for endpoints of interest. For  
241 summarization of baseline data, the following conventions will be used for partial  
242 missing date information occurring prior to randomization (e.g. for medical history  
243 or prior treatment). If year is missing, the date will be set at missing. If year is  
244 available, but month and date is missing, the month and date will be set to July 1<sup>st</sup> of  
245 the respective year. If date is missing, but year and month available, the day will be  
246 set to the 15<sup>th</sup> of the respective month.



247

---

248 **Interim Analyses**

249 A formal futility analysis will be performed after approximately 200 subjects are  
250 enrolled and have their primary outcome ascertained. Simulation will be used to  
251 estimate the conditional probability of futility assuming the study was to continue to  
252 completion, and assuming the clinically significant cancer detection rate is 30% in  
253 both arms. If the conditional probability is 0.95 or higher that continuation of the  
254 study will result in a negative result, the DSMC will recommend a suspension of  
255 recruitment to the trial, and initiation of a quality assurance review. A decision to  
256 permanently close the study or continue with accrual will be determined by the  
257 Steering Committee, based on the results of the quality assurance review, and the  
258 recommendation of the DSMC.

259

260 **Timing of Final Analysis**

261 A single, final, analysis will occur after all patients have undergone their initial biopsy  
262 and all data related to the initial biopsy is documented and validated. Follow-up  
263 analyses will be conducted after all patients have completed two years of follow-up.

264

265

---

266 1. Title Page  
267 Full title:  
268 **A phase III multi-centre open-label randomized controlled trial of**  
269 **multi-parametric magnetic resonance imaging (MRI)-targeted biopsy**  
270 **compared to systematic trans-rectal ultrasound (TRUS) guided biopsy**  
271 **for the diagnosis of prostate cancer in men without prior biopsy.**  
272  
273 **Short title: PRostate Evaluation for Clinically Iimportant disease: MRI vs**  
274 **Standard Evaluation procedures. (PRECISE)**  
275  
276 **Date: 27 September 2016**  
277 **Version 1.0**  
278  
279 **Sponsor:**  
280 Ontario Institute for Cancer Research  
281  
282 **Principal Investigator:**  
283 Dr. Laurence Klotz  
284 Professor of Surgery, University of Toronto  
285 Sunnybrook Health Sciences Centre  
286 2075 Bayview Avenue, #MG 408  
287 Toronto Ontario M4N3M5 Canada  
288 Voice 416 480 4673  
289 Fax 416 480 6121  
290  
291 **Co-Principal Investigators:**  
292 Dr. Masoom A. Haider  
293 Sunnybrook Health Sciences Centre  
294 2075 Bayview Avenue, Room AG 57  
295 Toronto Ontario M4N 3M5 Canada  
296  
297 Dr. Andrew Loblaw  
298 Sunnybrook Health Sciences Centre  
299 2075 Bayview Avenue, Room T2 161  
300 Toronto Ontario M4N 3M5 Canada  
301  
302 **Co- Investigators:**  
303 Dr. Laurent Milot  
304 Sunnybrook Health Sciences Centre  
305 2075 Bayview Avenue, Room AG 279  
306 Toronto Ontario M4N 3M5 Canada  
307  
308 Craig Earle  
309 Sunnybrook Health Sciences Centre  
310 2075 Bayview Avenue  
311 Toronto Ontario M4N 3M5 Canada

312  
313  
314  
315  
316  
317  
318  
319  
320  
321  
322  
323  
324  
325  
326  
327  
328  
329  
330  
331  
332  
333  
334  
335  
336  
337  
338  
339  
340  
341  
342  
343  
344  
345  
346  
347  
348  
349  
350  
351

---

**Confidential**

The information provided in this document is strictly confidential and is intended solely for the guidance of the clinical investigation. Reproduction or disclosure of this document - whether in part or in full - to parties not associated with the clinical investigation, or its use for any other purpose, without the prior written consent of the PI is not permitted.

**2. Signature of Investigators**

**A phase III multi-centre open-label randomized controlled trial of multi-parametric magnetic resonance imaging (MRI)-targeted biopsy compared to systematic trans-rectal ultrasound (TRUS) guided biopsy for the diagnosis of prostate cancer in men without prior biopsy.**

**Date: 27 September 2016**

**Version 1.0**

The signatory agrees to the content of the final clinical study protocol as presented.

Signature: \_\_\_\_\_

Name: \_\_\_\_\_

Title: \_\_\_\_\_

Date: \_\_\_\_\_

Site name: \_\_\_\_\_

Site #: \_\_\_\_\_

### 3. Synopsis

|                      |                                                                                                                                                                                                                                                                                                                                                                                                                                                                                                                                                                                                                                                                                                                                                                                                                                                                                                                                                                                                                                                                                                                                                                                                                                                                                                                                                                                                                                                                                                                                                                                                                                                                                                                                                                                                                                                                             |
|----------------------|-----------------------------------------------------------------------------------------------------------------------------------------------------------------------------------------------------------------------------------------------------------------------------------------------------------------------------------------------------------------------------------------------------------------------------------------------------------------------------------------------------------------------------------------------------------------------------------------------------------------------------------------------------------------------------------------------------------------------------------------------------------------------------------------------------------------------------------------------------------------------------------------------------------------------------------------------------------------------------------------------------------------------------------------------------------------------------------------------------------------------------------------------------------------------------------------------------------------------------------------------------------------------------------------------------------------------------------------------------------------------------------------------------------------------------------------------------------------------------------------------------------------------------------------------------------------------------------------------------------------------------------------------------------------------------------------------------------------------------------------------------------------------------------------------------------------------------------------------------------------------------|
| Title                | A phase III multi-centre, open-label randomized controlled trial of multi-parametric magnetic resonance imaging (MRI)-targeted biopsy compared to systematic trans-rectal ultrasound (TRUS) guided biopsy for the diagnosis of prostate cancer in men without prior biopsy.                                                                                                                                                                                                                                                                                                                                                                                                                                                                                                                                                                                                                                                                                                                                                                                                                                                                                                                                                                                                                                                                                                                                                                                                                                                                                                                                                                                                                                                                                                                                                                                                 |
| Short Title          | <u>P</u> rostate <u>E</u> valuation for <u>C</u> linically <u>I</u> mportant disease: MRI vs <u>S</u> tandard <u>E</u> valuation procedures. (PRECISE)                                                                                                                                                                                                                                                                                                                                                                                                                                                                                                                                                                                                                                                                                                                                                                                                                                                                                                                                                                                                                                                                                                                                                                                                                                                                                                                                                                                                                                                                                                                                                                                                                                                                                                                      |
| Clinical study phase | Phase III                                                                                                                                                                                                                                                                                                                                                                                                                                                                                                                                                                                                                                                                                                                                                                                                                                                                                                                                                                                                                                                                                                                                                                                                                                                                                                                                                                                                                                                                                                                                                                                                                                                                                                                                                                                                                                                                   |
| Study Objectives     | <p><b>Primary Objective</b></p> <p>To determine whether the proportion of men with clinically significant cancer (Gleason <math>\geq 7</math>) detected by MRI-targeted biopsy is no less than systematic TRUS guided biopsy.</p> <p><b>Secondary Objectives</b></p> <ol style="list-style-type: none"> <li>1. To determine whether the proportion of men with clinically significant cancer (Gleason <math>\geq 7</math>) detected by MRI-targeted biopsy is greater than systematic TRUS guided biopsy.</li> <li>2. Proportion of men in each arm with clinically insignificant cancer detected.</li> <li>3. Proportion of men in each arm with Gleason <math>\geq 4+3</math> detected.</li> <li>4. Proportion of men in MRI arm who avoid biopsy.</li> <li>5. Proportion of men in the MRI arm whom the PI-RADS score for suspicion of clinically significant cancer was 3, 4 or 5 but no clinically significant cancer was detected.</li> <li>6. Proportion of men in each arm who go on to definitive local treatment (e.g. radical prostatectomy, radiotherapy, brachytherapy) or systemic treatment (e.g. hormone therapy, chemotherapy).</li> <li>7. Maximal cancer core length of the most involved biopsy core (maximum cancer core length, MCCL) in each arm.</li> <li>8. Total contiguous cancer core length of the most involved biopsy core (contiguous maximum cancer core length, CMCCCL) excluding intervening normal regions.</li> <li>9. Proportion of men with a negative MRI who develop a positive MRI and/ or Gleason <math>\geq 7</math> cancer by 2 years.</li> <li>10. Proportion of men with post-biopsy adverse events</li> <li>11. Health-related quality of life scores.</li> <li>12. Proportion with Gleason grade upgrading in men undergoing radical prostatectomy.</li> <li>13. To determine the cost per diagnosis of cancer.</li> </ol> |
| Test procedures      | Subjects will be randomized to either<br><b>ARM A:</b> multi-parametric magnetic resonance imaging (MRI)                                                                                                                                                                                                                                                                                                                                                                                                                                                                                                                                                                                                                                                                                                                                                                                                                                                                                                                                                                                                                                                                                                                                                                                                                                                                                                                                                                                                                                                                                                                                                                                                                                                                                                                                                                    |

|                                           |                                                                                                                                                                                                                                                                                                                                                                                                                                                                                                                                                                                                                                                                                                                                                          |
|-------------------------------------------|----------------------------------------------------------------------------------------------------------------------------------------------------------------------------------------------------------------------------------------------------------------------------------------------------------------------------------------------------------------------------------------------------------------------------------------------------------------------------------------------------------------------------------------------------------------------------------------------------------------------------------------------------------------------------------------------------------------------------------------------------------|
|                                           | <p>which, depending on outcome, may be followed by (MRI)-targeted biopsy.</p> <p><b>ARM B:</b> systematic trans-rectal ultrasound (TRUS) guided biopsy.</p> <p>Subjects in both arms will complete a number of different questionnaires and will have PSA measurements taken. If subjects consent to participate in correlative studies, they will also need to provide blood, urine, and semen samples at pre-specified time points.</p>                                                                                                                                                                                                                                                                                                                |
| Indication                                | Clinical suspicion of prostate cancer, based on PSA or results of digital rectal exam, with no prior biopsy.                                                                                                                                                                                                                                                                                                                                                                                                                                                                                                                                                                                                                                             |
| Diagnosis and main criteria for inclusion | <p>In order to be eligible, <u>all</u> inclusion criteria must be met.</p> <ol style="list-style-type: none"> <li>1. Men at least 18 years of age referred with clinical suspicion of prostate cancer who have been advised to have a prostate biopsy;</li> <li>2. <math>\geq 5\%</math> chance of high-grade prostate cancer as calculated using individualized risk assessment of prostate cancer calculator, PCPTRC 2.0, found at <a href="http://deb.uthscsa.edu/URORiskCalc/Pages/calcs.jsp">http://deb.uthscsa.edu/URORiskCalc/Pages/calcs.jsp</a>;</li> <li>3. Serum PSA <math>\leq 20</math>ng/ml;</li> <li>4. Fit to undergo all procedures listed in protocol;</li> <li>5. Able to provide written informed consent.</li> </ol>                |
| Exclusion Criteria                        | <p>Men who meet the following criteria at the time of screening will be excluded:</p> <ol style="list-style-type: none"> <li>1. Prior prostate biopsy;</li> <li>2. Prior treatment for prostate cancer;</li> <li>3. Contraindication to MRI (e.g. claustrophobia, pacemaker, estimated GFR <math>\leq 50</math>mls/min);</li> <li>4. Contraindication to prostate biopsy;</li> <li>5. Men in whom artifact would reduce the quality of the MRI; i.e, previous hip replacement surgery, metallic hip replacement or extensive pelvic orthopaedic metal work;</li> <li>6. Unfit to undergo any procedures listed in protocol.</li> </ol>                                                                                                                   |
| Study Design                              | This is a multi-centre open-label, randomized two arm study. Men are either randomized to receive MRI or a systematic trans-rectal ultrasound (TRUS) guided biopsy.                                                                                                                                                                                                                                                                                                                                                                                                                                                                                                                                                                                      |
| Methodology                               | <p>Eligible subjects will be randomized in a 1:1 ratio to receive either (<b>ARM A</b>) multi-parametric magnetic resonance imaging (MRI) which, depending on outcome, may be followed by (MRI)-targeted biopsy, or (<b>ARM B</b>) systematic trans-rectal ultrasound (TRUS) guided biopsy. The time frame for data collection is shown in <b>Appendix 1</b>.</p> <p><u>All subjects</u> will have a PSA test prior to, or at Visit 1, and will complete a baseline EQ-5D-5L questionnaire. In addition, they will contribute optional blood, urine and semen samples if they consent to correlative studies.</p> <p><u>All subjects in ARM A</u> will complete an EQ-5D-5L questionnaire and an immediate post-MRI/TRUS Fusion Biopsy questionnaire</p> |

|                               |                                                                                                                                                                                                                                                                                                                                                                                                                                                                                                                                                                                                                                                                                                                                                                                                                                                                                                                                                                                                                                                                                                                                                                                                                                                                                                                                                                                                                                                                                                                                              |
|-------------------------------|----------------------------------------------------------------------------------------------------------------------------------------------------------------------------------------------------------------------------------------------------------------------------------------------------------------------------------------------------------------------------------------------------------------------------------------------------------------------------------------------------------------------------------------------------------------------------------------------------------------------------------------------------------------------------------------------------------------------------------------------------------------------------------------------------------------------------------------------------------------------------------------------------------------------------------------------------------------------------------------------------------------------------------------------------------------------------------------------------------------------------------------------------------------------------------------------------------------------------------------------------------------------------------------------------------------------------------------------------------------------------------------------------------------------------------------------------------------------------------------------------------------------------------------------|
|                               | <p>following the MRI.</p> <p><u>Subjects in ARM A who do not receive a subsequent biopsy</u> will complete an EQ-5D-5L questionnaire and a 30-day post MRI/TRUS Fusion Biopsy questionnaire when they find out the results of the MRI 3 weeks (<math>\pm</math> 1 week) after the procedure. They will have another MRI and PSA test 2 years after the initial MRI. When they complete the study after 2 years of follow up, they will complete another EQ-5D-5L questionnaire.</p> <p><u>Subjects in ARM A who do receive a MRI-targeted biopsy</u> will complete an EQ-5D-5L questionnaire and an immediate post-biopsy questionnaire at the time of the biopsy, another an EQ-5D-5L questionnaire and a 30-day post biopsy questionnaire when they find out the results of the biopsy, 3 weeks (<math>\pm</math> 1 week) after the procedure. They will have an additional PSA test each year for two years, and at the end of 2 years of follow up, they will complete another EQ-5D-5L questionnaire.</p> <p><u>All subjects in ARM B</u> will complete an EQ-5D-5L questionnaire and an immediate post-biopsy questionnaire following the standardized TRUS-guided biopsy. They will complete another EQ-5D-5L questionnaire and a 30-day post biopsy questionnaire when they find out the results of the biopsy, 3 weeks (<math>\pm</math> 1 week) after the procedure. They will have an additional PSA test each year for two years, and at the end of 2 years of follow up, they will complete another EQ-5D-5L questionnaire.</p> |
| Type of control               | This is an open-label randomized study.                                                                                                                                                                                                                                                                                                                                                                                                                                                                                                                                                                                                                                                                                                                                                                                                                                                                                                                                                                                                                                                                                                                                                                                                                                                                                                                                                                                                                                                                                                      |
| Number of subjects            | This study requires 422 subjects (211 in each arm). To account for potential withdrawal / loss to follow up and the effect of stratification, the sample size will be inflated by 5%, and a target of <b>450 men</b> will be recruited.                                                                                                                                                                                                                                                                                                                                                                                                                                                                                                                                                                                                                                                                                                                                                                                                                                                                                                                                                                                                                                                                                                                                                                                                                                                                                                      |
| Primary endpoint              | The proportion of men in each arm with clinically significant cancer (Gleason $\geq$ 7) will be calculated based on histology results from biopsy procedures. Analysis will be on the per protocol study population.                                                                                                                                                                                                                                                                                                                                                                                                                                                                                                                                                                                                                                                                                                                                                                                                                                                                                                                                                                                                                                                                                                                                                                                                                                                                                                                         |
| Secondary endpoints           | See section 7.4                                                                                                                                                                                                                                                                                                                                                                                                                                                                                                                                                                                                                                                                                                                                                                                                                                                                                                                                                                                                                                                                                                                                                                                                                                                                                                                                                                                                                                                                                                                              |
| Plan for statistical analysis | See section 14.0.                                                                                                                                                                                                                                                                                                                                                                                                                                                                                                                                                                                                                                                                                                                                                                                                                                                                                                                                                                                                                                                                                                                                                                                                                                                                                                                                                                                                                                                                                                                            |
| Funding                       | The total budget for this trial is \$3,000,000. (see attached). Ontario Institute for Cancer Research (OICR) has committed to \$1,500,000 in support of this study (letter appended). We hope to obtain the additional \$1,500,000 from the Movember Accelerated Translational Research Grant Competition                                                                                                                                                                                                                                                                                                                                                                                                                                                                                                                                                                                                                                                                                                                                                                                                                                                                                                                                                                                                                                                                                                                                                                                                                                    |

354  
355

|     |                                                                                          |           |
|-----|------------------------------------------------------------------------------------------|-----------|
| 356 | <b>Table of Contents</b>                                                                 |           |
| 357 | <b>1. TITLE PAGE</b> .....                                                               | <b>1</b>  |
| 358 | <b>2. SIGNATURE OF INVESTIGATORS</b> .....                                               | <b>11</b> |
| 359 | <b>3. SYNOPSIS</b> .....                                                                 | <b>12</b> |
| 360 | <b>4. ABBREVIATIONS AND DEFINITIONS</b> .....                                            | <b>18</b> |
| 361 | <b>5. TRIAL SUMMARY</b> .....                                                            | <b>19</b> |
| 362 | 5.1 AIM AND RATIONALE .....                                                              | 19        |
| 363 | 5.2 METHODS .....                                                                        | 19        |
| 364 | 5.3 PARTICIPATING SITES .....                                                            | 21        |
| 365 | 5.4 STUDY OUTCOMES .....                                                                 | 21        |
| 366 | 5.4.1 <i>Primary outcome</i> .....                                                       | 21        |
| 367 | 5.4.2 <i>Secondary outcomes</i> .....                                                    | 21        |
| 368 | <b>6. BACKGROUND</b> .....                                                               | <b>22</b> |
| 369 | 6.1 PROSTATE CANCER DIAGNOSIS .....                                                      | 22        |
| 370 | 6.2 CLINICALLY SIGNIFICANT VERSUS CLINICALLY INSIGNIFICANT PROSTATE CANCER.....          | 22        |
| 371 | 6.3 CURRENT STANDARD OF CARE: SYSTEMATIC TRUS GUIDED BIOPSY .....                        | 23        |
| 372 | 6.4 THE EMERGING ROLE OF MRI IN PROSTATE CANCER DIAGNOSIS AND TREATMENT .....            | 23        |
| 373 | 6.4.1 <i>The role of imaging in prostate cancer diagnosis</i> .....                      | 23        |
| 374 | 6.4.2 <i>Limitations of early MRI studies in prostate cancer</i> .....                   | 23        |
| 375 | 6.4.3 <i>Emerging role of MRI in the diagnosis of prostate cancer</i> .....              | 24        |
| 376 | 6.4.4 <i>Prostate cancer detection rates of MRI-targeted biopsy are similar to other</i> |           |
| 377 | <i>methods</i> .....                                                                     | 26        |
| 378 | 6.4.5 <i>Limitations of studies reporting MPMRI-targeted prostate biopsy</i> .....       | 26        |
| 379 | 6.5 NOVELTY OF PRECISE .....                                                             | 27        |
| 380 | <b>7. TRIAL OBJECTIVES</b> .....                                                         | <b>27</b> |
| 381 | 7.1 OVERALL AIM .....                                                                    | 27        |
| 382 | 7.2 HYPOTHESES .....                                                                     | 27        |
| 383 | 7.3 PRIMARY OBJECTIVE.....                                                               | 27        |
| 384 | 7.4 SECONDARY OBJECTIVES .....                                                           | 28        |
| 385 | 7.5 EXPLANATION FOR NON-INFERIORITY HYPOTHESIS .....                                     | 28        |
| 386 | 7.6 ANTICIPATED TIMELINE OF STUDY PROGRESSION .....                                      | 28        |
| 387 | <b>8. STUDY POPULATION</b> .....                                                         | <b>29</b> |
| 388 | 8.1 NUMBER OF SUBJECTS .....                                                             | 29        |
| 389 | 8.2 SUBJECT INCLUSION CRITERIA .....                                                     | 29        |
| 390 | 8.3 SUBJECT EXCLUSION CRITERIA.....                                                      | 29        |
| 391 | <b>9. STUDY DESIGN</b> .....                                                             | <b>30</b> |
| 392 | 9.1 STUDY DESIGN .....                                                                   | 30        |
| 393 | 9.2 STUDY TRIAL SCHEMA.....                                                              | 31        |
| 394 | 9.3 TIMELINE OF SUBJECT CONTACT .....                                                    | 32        |
| 395 | <b>10. TRIAL INTERVENTIONS AND PROCEDURES</b> .....                                      | <b>36</b> |
| 396 | 10.1 EQ-5D-5L QUESTIONNAIRES.....                                                        | 36        |
| 397 | 10.2 MULTIPARAMETRIC MRI IMAGING PROCEDURE .....                                         | 36        |
| 398 | 10.2.1 <i>MRI Protocol</i> .....                                                         | 36        |
| 399 | 10.2.2 <i>MRI reporting</i> .....                                                        | 37        |
| 400 | 10.3 IMMEDIATE POST MRI QUESTIONNAIRE.....                                               | 38        |
| 401 | 10.4 NO TARGET IDENTIFIED ON MPMRI (PIRADS 1 OR 2).....                                  | 38        |
| 402 | 10.5 POST-MRI 30-DAY QUESTIONNAIRE (PIRADS 1 OR 2) .....                                 | 38        |

|     |                                                                                      |                                     |
|-----|--------------------------------------------------------------------------------------|-------------------------------------|
| 403 | 10.6 MRI-TARGETED BIOPSY .....                                                       | 38                                  |
| 404 | 10.6.1 MRI choice of targets for targeted biopsy .....                               | 38                                  |
| 405 | 10.6.2 MRI Biopsy .....                                                              | 39                                  |
| 406 | 10.7 SYSTEMATIC TRUS GUIDED BIOPSY .....                                             | 40                                  |
| 407 | 10.8 PATHOLOGY .....                                                                 | 40                                  |
| 408 | 10.9 POST-PROCEDURAL CARE .....                                                      | 40                                  |
| 409 | 10.10 IMMEDIATE POST-BIOPSY QUESTIONNAIRE .....                                      | 40                                  |
| 410 | 10.11 30-DAY POST-BIOPSY QUESTIONNAIRE.....                                          | 41                                  |
| 411 | 10.12 30-DAY POST INTERVENTION EQ-5D-5L QUESTIONNAIRE .....                          | 41                                  |
| 412 | 10.13 RESULTS AND TREATMENT DECISION (VISIT 4).....                                  | 41                                  |
| 413 | 10.14 FOLLOW UP PERIOD.....                                                          | 42                                  |
| 414 | 10.15 ADDITIONAL TESTS FOR BIOMARKER DISCOVERY - OPTIONAL .....                      | 43                                  |
| 415 | 10.15.1 Samples to be collected for future biomarker discovery work (Optional) ..... | 43                                  |
| 416 | 10.16 LONG-TERM DATA LINKAGE – PERMISSION TO CONTACT .....                           | 43                                  |
| 417 | 10.17 END OF STUDY .....                                                             | 44                                  |
| 418 | 10.18 RISKS AND BENEFITS TO PARTICIPANTS .....                                       | 44                                  |
| 419 | 10.18.1 Risks to subjects .....                                                      | 44                                  |
| 420 | 10.18.2 Benefits to subjects .....                                                   | 46                                  |
| 421 | 10.19 CONCOMITANT MEDICATIONS .....                                                  | 46                                  |
| 422 | 10.19.1 Permitted Medications .....                                                  | 46                                  |
| 423 | 10.19.2 Non-Drug Therapies .....                                                     | 46                                  |
| 424 | <b>11. SCHEDULE OF STUDY VISITS .....</b>                                            | <b>47</b>                           |
| 425 | 11.1 VISIT 0 (TELEPHONE CONSULT): TELEPHONE CONSULT .....                            | 47                                  |
| 426 | 11.2 VISIT 1 (SCREENING/RANDOMIZATION): SCREENING, CONSENT, RANDOMIZATION.....       | 47                                  |
| 427 | 11.3 VISIT 2 (MRI): ARM A, FOR MEN RANDOMIZED TO MRI .....                           | 47                                  |
| 428 | 11.4 VISIT 3 (BIOPSY): ARM A, MRI-TARGETED BIOPSY OF PROSTATE .....                  | 47                                  |
| 429 | 11.5 VISIT 3 (BIOPSY): ARM B, FOR MEN RANDOMIZED TO A SYSTEMATIC TRUS-BIOPSY .....   | 48                                  |
| 430 | 11.6 VISIT 4 (POST-TEST FOLLOW UP): ARM A, FOR MEN WHO DID NOT RECEIVE A BIOPSY..... | 49                                  |
| 431 | 11.7 VISIT 4 (POST-TEST FOLLOW UP): FOR ALL MEN WHO RECEIVED A BIOPSY .....          | 49                                  |
| 432 | 11.8 VISIT 5(1 YEAR FOLLOW UP): 52 WEEK FOLLOW UP .....                              | 49                                  |
| 433 | 11.9 VISIT 6 (2 YEAR FOLLOW UP): END OF STUDY .....                                  | 50                                  |
| 434 | <b>12. RANDOMIZATION .....</b>                                                       | <b>50</b>                           |
| 435 | 12.1 REGISTRATION AND RANDOMIZATION PROCEDURE.....                                   | 50                                  |
| 436 | 12.2 STRATIFICATION.....                                                             | 51                                  |
| 437 | 12.3 BLINDING AND MEASURES TAKEN TO AVOID BIAS.....                                  | 51                                  |
| 438 | <b>13. DATA.....</b>                                                                 | <b>51</b>                           |
| 439 | <b>14. STATISTICAL CONSIDERATIONS .....</b>                                          | <b>52</b>                           |
| 440 | 14.1 SAMPLE SIZE CALCULATION .....                                                   | 52                                  |
| 441 | 14.2 INTERIM ANALYSIS .....                                                          | <b>ERROR! BOOKMARK NOT DEFINED.</b> |
| 442 | 14.3 POPULATIONS: .....                                                              | 55                                  |
| 443 | 14.4 PRIMARY OUTCOME.....                                                            | 55                                  |
| 444 | 14.5 SECONDARY OUTCOMES .....                                                        | 55                                  |
| 445 | <b>15. PARTICIPANT COMPLIANCE AND WITHDRAWAL .....</b>                               | <b>59</b>                           |
| 446 | 15.1 SUBJECT WITHDRAWAL FROM STUDY.....                                              | 59                                  |
| 447 | 15.2 STUDY COMPLETION .....                                                          | 60                                  |
| 448 | <b>16. DATA MONITORING, QUALITY CONTROL AND SAFETY.....</b>                          | <b>60</b>                           |
| 449 | 16.1 STOPPING / DISCONTINUATION RULES .....                                          | 60                                  |
| 450 | 16.2 MONITORING, QUALITY CONTROL AND ASSURANCE .....                                 | 61                                  |
| 451 | 16.3 ASSESSMENT OF SAFETY .....                                                      | 61                                  |
| 452 | 16.3.1 Definition of an Adverse Event (AE) .....                                     | 61                                  |



|     |                                                                                    |           |
|-----|------------------------------------------------------------------------------------|-----------|
| 453 | 16.3.2 Definition of a Serious Adverse Event (SAE).....                            | 61        |
| 454 | 16.3.3 Disease-Related Events or Outcomes Not Qualifying as SAEs.....              | 62        |
| 455 | 16.3.4 Lack of Efficacy.....                                                       | 62        |
| 456 | 16.3.5 Clinical Laboratory Abnormalities and Other Abnormal Assessments as AEs and |           |
| 457 | SAEs.....                                                                          | 62        |
| 458 | 16.3.6 Recording/Reporting AEs and SAEs .....                                      | 63        |
| 459 | 16.3.7 Evaluating AEs and SAEs.....                                                | 64        |
| 460 | 16.3.8 Follow-up of AEs and SAEs.....                                              | 65        |
| 461 | 16.3.9 Prompt Reporting of SAEs.....                                               | 65        |
| 462 | 16.3.10 Post-study AEs and SAEs.....                                               | 66        |
| 463 | <b>17. STUDY ADMINISTRATION .....</b>                                              | <b>66</b> |
| 464 | 17.1 REGULATORY AND ETHICAL CONSIDERATIONS.....                                    | 66        |
| 465 | 17.1.1 Ethical Conduct of the Study and Ethics Approval .....                      | 66        |
| 466 | 17.1.2 Informed Consent.....                                                       | 67        |
| 467 | 17.1.3 Investigator Reporting Requirements.....                                    | 67        |
| 468 | 17.2 STUDY MONITORING .....                                                        | 67        |
| 469 | 17.3 QUALITY ASSURANCE.....                                                        | 68        |
| 470 | 17.4 STUDY AND SITE CLOSURE .....                                                  | 68        |
| 471 | 17.5 RECORDS RETENTION .....                                                       | 69        |
| 472 | 17.6 DATA MANAGEMENT .....                                                         | 69        |
| 473 | 17.7 PUBLICATION .....                                                             | 69        |
| 474 | <b>18. REFERENCES.....</b>                                                         | <b>71</b> |
| 475 | <b>APPENDICES .....</b>                                                            | <b>76</b> |
| 476 | APPENDIX 1: TIME WINDOWS FOR DATA COLLECTION .....                                 | 76        |
| 477 | APPENDIX 2: MPMRI REPORTING PROFORMA .....                                         | 81        |
| 478 | APPENDIX 3: EXAMPLE OF SYSTEMATIC TRUS GUIDED BIOPSY SCHEMA .....                  | 83        |
| 479 | APPENDIX 4: 2-PAGE EQ-5D-5L QUESTIONNAIRE .....                                    | 84        |
| 480 | APPENDIX 5: IMMEDIATE POST MRI/TRUS FUSION BIOPSY QUESTIONNAIRE .....              | 86        |
| 481 | APPENDIX 6: 30-DAY POST MRI/TRUS Fusion BiopsyQUESTIONNAIRE.....                   | 74        |
| 482 | APPENDIX 7: IMMEDIATE POST BIOPSY QUESTIONNAIRE.....                               | 80        |
| 483 | APPENDIX 8: 30-DAY POST BIOPSY QUESTIONNAIRE.....                                  | 82        |
| 484 |                                                                                    |           |
| 485 |                                                                                    |           |
| 486 |                                                                                    |           |
| 487 |                                                                                    |           |

---

#### 488 4. Abbreviations and definitions

##### 489 Abbreviations:

|     |          |                                                     |
|-----|----------|-----------------------------------------------------|
| 490 |          |                                                     |
| 491 | ADC      | Apparent diffusion coefficient                      |
| 492 | CI       | Confidence interval                                 |
| 493 | CRF      | Case report form                                    |
| 494 | DSMC     | Data Safety and Monitoring Committee                |
| 495 | DRE      | Digital rectal examination                          |
| 496 | DWI      | Diffusion weighted imaging                          |
| 497 | DCE      | Dynamic contrast enhancement                        |
| 498 | ITT      | Intention to treat                                  |
| 499 | MCCL     | Maximum cancer core length                          |
| 500 | MPMRI    | Multi-parametric MRI, used interchangeably with MRI |
| 501 |          | in this protocol.                                   |
| 502 | MPMRI-TB | Multi-parametric magnetic resonance image-targeted  |
| 503 |          | biopsy of the prostate                              |
| 504 | MRI      | Magnetic resonance imaging, used interchangeably    |
| 505 |          | with MPMRI in this protocol                         |
| 506 | MRS      | Magnetic resonance spectroscopy                     |
| 507 | PI       | Principal Investigator                              |
| 508 | PI-RADS  | Prostate Imaging Reporting and Data System          |
| 509 | PTC      | Permission to Contact                               |
| 510 | PSA      | Prostate specific antigen                           |
| 511 | REB      | Research Ethics Board                               |
| 512 | STARD    | Standards for the reporting of diagnostic studies   |
| 513 | TRUS     | Trans-rectal ultrasound                             |
| 514 | TSC      | Trial Steering Committee                            |
| 515 | T2W      | T2-weighted imaging                                 |

516

517

##### 518 Definitions:

519

|     |                        |                                                |
|-----|------------------------|------------------------------------------------|
| 520 | MP MRI-targeted biopsy | A biopsy technique where an MP MRI scan is     |
| 521 |                        | used to determine the location of a suspicious |
| 522 |                        | target prior to biopsy.                        |

523

|     |                               |                                               |
|-----|-------------------------------|-----------------------------------------------|
| 524 | Systematic TRUS guided biopsy | A biopsy approach where conduct of procedure  |
| 525 |                               | is not influenced by findings on MRI imaging. |
| 526 |                               | Currently this is the standard of care for    |
| 527 |                               | prostate cancer in the province of Ontario.   |

528

529

530

---

531 **5. Trial summary**

532

533 **5.1 Aim and Rationale**

534

535 The standard pathway for prostate cancer diagnosis is trans-rectal ultrasound guided  
536 (TRUS) biopsy of the prostate following an elevated PSA. TRUS guidance is  
537 performed primarily for anatomic guidance as the ultrasound poorly discriminates  
538 between cancerous and non-cancerous tissue. TRUS guided prostate biopsies are  
539 concentrated in areas of the peripheral zone, thought to harbor the majority of  
540 cancer.

541

542 An alternative pathway for prostate cancer diagnosis in men with elevated PSA is to  
543 perform multi-parametric magnetic resonance imaging (MPMRI) to localize cancer.  
544 This information is used to direct a subsequent biopsy, known as an MRI-targeted  
545 biopsy. MRI-targeted biopsy has been shown in preliminary studies to detect a  
546 similar or greater amount of clinically significant cancer than systematic TRUS guided  
547 biopsy and has several other potential advantages including: the ability to  
548 differentiate between clinically significant and insignificant cancer, reducing  
549 unnecessary biopsy and fewer numbers of biopsy cores, reducing biopsy-related  
550 side-effects.

551

552

553 A 'clinically insignificant cancer' is cancer that is unlikely to progress or to affect an  
554 individual's life expectancy and therefore does not warrant treatment. However  
555 when diagnosed with low grade cancer that is likely to be insignificant, a large  
556 proportion of subjects request treatment in case a more significant cancer is present  
557 [1]. A challenge in this area is that subjects are typically not aware that their cancer  
558 is clinically insignificant, and often view the early diagnosis and aggressive treatment  
559 they have been subjected to as life-saving.

560 A prostate cancer detection procedure that differentiates clinically significant cancer  
561 from clinically insignificant cancer is therefore a major unmet need.

562

563 The potential implications of this trial include:

564

565

566

567

568

569

570

571

- A redefinition of the prostate cancer diagnostic pathway;
- A reduction in the number of subjects undergoing prostate biopsy;
- A reduction in the number of biopsy cores taken per subject;
- A reduction in biopsy-related adverse events including sepsis and pain;
- A reduction in the over-diagnosis of clinically insignificant prostate cancer;
- A reduction in the economic burden of diagnosing and treating prostate cancer.

572 **5.2 Methods**

573

---

574 Men referred with clinical suspicion of prostate cancer who have had no prior biopsy  
575 are randomized to either systematic TRUS guided biopsy (standard of care) or to a  
576 multi-parametric MRI (MPMRI) arm (the investigational arm). In the MRI arm, areas  
577 of the prostate are scored on a 5-point scale of suspicion for clinically significant  
578 cancer based on the Prostate Imaging Reporting and Data System  
579 (PI-RADS) v2[2]:

580 PI-RADS 1 – Very low (clinically significant cancer is highly unlikely to be  
581 present)

582 PI-RADS 2 – Low (clinically significant cancer is unlikely to be present)

583 PI-RADS 3 – Intermediate (the presence of clinically significant cancer is  
584 equivocal)

585 PI-RADS 4 – High (clinically significant cancer is likely to be present)

586 PI-RADS 5 – Very high (clinically significant cancer is highly likely to be  
587 present)

588

589 Each suspicious area will be given a separate score as described by consensus  
590 meeting recommendations [2, 3]. Lesions scoring 3, 4 or 5 will undergo targeted  
591 biopsy; up to three suspicious areas will be targeted.

592

593 In the control arm, subjects will undergo a standard 12 core systematic TRUS guided  
594 biopsy as per standard recommendations [4]. Suspicious sonographic lesions will be  
595 targeted (12 cores *in toto*).

596

597 Pathologic findings from all biopsies will be recorded and will undergo statistical  
598 analysis (see statistics section, 14.0).

599

600 In both arms, self-reported questionnaires to capture biopsy-specific side effects will  
601 be administered immediately post-procedure, and at the post-procedure  
602 appointment which will take place 3 weeks ( $\pm$  1 week) after the procedure. EuroQOL  
603 group 5 domain EQ-5D-5L questionnaires or a comparable QOL instrument will also  
604 be completed at baseline (prior to MRI or TRUS biopsy), 24 hours post MRI and 24  
605 hours post-biopsy. Men will be followed up for 30-days post intervention and until a  
606 treatment decision is made and recorded. Pathology results from men requiring a  
607 radical prostatectomy will be recorded.

608

609 Men will complete the trial after they complete treatment for prostate cancer  
610 (radical prostatectomy) or the required follow-up procedures for each arm are met  
611 (see study timelines, section 9.3). Once men complete the trial, they revert to  
612 standard of care.

613

614 Annual questionnaires will be administered for all men with negative biopsy in both  
615 arms during a two-year follow-up period to determine cancer and treatment status.

616

617 No diagnostic test is perfect, and even with the best test some cancers may be  
618 missed. To minimize the risk of false negatives, men with negative biopsy results will  
619 be followed with serial PSA testing; PSA levels will increase if cancer is present. In  
620 addition to serial PSA testing, in this study men who had a negative MRI (defined as

---

621 no cancer detected) and do not have a biopsy will have a follow up MRI at 24  
622 months.

623

624 As recruitment is expected to take up to 24 months (see section 7.6) and each  
625 subject will be followed up for two years, the estimated maximal duration of this  
626 study is four years in total. The primary end point will be reached at approximately 2  
627 years after study initiation.

### 628 **5.3 Participating Sites**

629 This is a multi-centre study. Institutions participating in the study must be able to  
630 perform both the systematic TRUS guided biopsy and the MRI-TB. They must be able  
631 to randomize men to one of these two diagnostic tests.

632

633 We expect to recruit 3-6 subjects per month per site, based on recruitment rates  
634 from previous diagnostic trials performed by the centers involved. A typical centre  
635 sees 15-30 eligible men per month. We expect 5 recruitment sites, with 100 men to  
636 be recruited at each site over an 18-24 month period (see section 7.6).

### 637 **5.4 Study outcomes**

#### 638 **5.4.1 Primary outcome**

639 To determine whether the proportion of men with clinically significant cancer  
640 (Gleason  $\geq 7$ ) detected by MRI-targeted biopsy is no less than systematic TRUS  
641 guided biopsy.

#### 642 **5.4.2 Secondary outcomes**

- 643 1. To determine whether the proportion of men with clinically significant cancer  
644 (Gleason  $\geq 7$ ) detected by MRI-targeted biopsy is greater than systematic TRUS  
645 guided biopsy.
- 646 2. Proportion of men in each arm with clinically insignificant cancer detected.
- 647 3. Proportion of men in each arm with Gleason  $\geq 4+3$  detected.
- 648 4. Proportion of men in MRI arm who avoid biopsy.
- 649 5. Proportion of men in the MRI arm whom the PI-RADS score for suspicion of  
650 clinically significant cancer was 3, 4 or 5 but no clinically significant cancer was  
651 detected.
- 652 6. Proportion of men in each arm who go on to definitive local treatment (e.g.  
653 radical prostatectomy, radiotherapy, brachytherapy) or systemic treatment (e.g.  
654 hormone therapy, chemotherapy).
- 655 7. Maximal cancer core length of the most involved biopsy core (maximum cancer  
656 core length, MCCL) in each arm.
- 657 8. Total contiguous cancer core length of the most involved biopsy core (contiguous  
658 maximum cancer core length, CMCL) excluding intervening normal regions.
- 659 9. Proportion of men with a negative MRI who develop a positive MRI and/ or  
660 Gleason  $\geq 7$  cancer by 2 years.
- 661 10. Proportion of men with post-biopsy adverse events
- 662 11. Health-related quality of life scores.
- 663 12. Proportion with Gleason grade upgrading in men undergoing radical

---

664 prostatectomy.  
665 13. To determine the cost per diagnosis of cancer.  
666

## 667 **6. Background**

### 668 **6.1 Prostate cancer diagnosis**

669 Prostate cancer is the most common male cancer in the Western world with an  
670 incidence of 24,000 new cases in Canada and 233,000 in the USA [5, 6]. It is the  
671 second most common cause of cancer death in European and North American men,  
672 with 2,900 deaths per year in Canada and 90,000 deaths per year in Europe [5, 6].  
673 The incidence of the disease has increased by 22% over the last decade due to the  
674 widespread use of the prostate specific antigen (PSA) blood test; by 2030 the  
675 Canadian Cancer Society estimates the incidence of prostate cancer will be 42,225.  
676 As prostate cancer is a histopathological diagnosis, men with raised PSA or abnormal  
677 digital rectal examination (DRE) are usually referred for a prostate biopsy. Over one  
678 million prostate biopsies are performed in North America and Europe every year [7].  
679

### 680 **6.2 Clinically significant versus clinically insignificant prostate cancer**

681  
682 Clinically significant prostate cancer is cancer that is likely to progress and affect a  
683 man's life expectancy if left untreated. Though there is no universally agreed upon  
684 definition on what histological parameters define clinically significant cancer, most  
685 agree that larger volume cancers with a higher Gleason grade are more likely to be  
686 clinically significant; an historically accepted threshold is a tumour volume above 0.5  
687 milliliters or any Gleason pattern 4 or 5 cancer [8-11].  
688

689 This definition is likely overly stringent. An increasing consensus views all Gleason  
690 pattern 3 (Gleason score 6) cancers and many Gleason 3 plus small amounts of  
691 pattern 4 cancers as likely insignificant [12]. About half of newly diagnosed prostate  
692 cancers fall into this category, and are unlikely to progress and affect a man's life  
693 expectancy if left untreated. The widespread use of PSA testing has led to more men  
694 being diagnosed with insignificant cancer that does not warrant any treatment [13];  
695 however they are typically monitored closely with active surveillance. This is  
696 associated with anxiety about harbouring untreated cancer, and the negative  
697 psychological effects of being a 'survivor' [14]. Men diagnosed with low risk prostate  
698 cancer are also subjected to serial biopsies and other tests, requiring long term  
699 follow up. Further, many men with low risk disease receive radical treatment, either  
700 because their physicians are not advocates of surveillance or because of anxiety  
701 [15]. These treatments may expose them to morbidity including urinary incontinence  
702 and erectile dysfunction [16]. Thus, diagnostic tests that clearly differentiate  
703 clinically significant cancer from clinically insignificant cancer will help reduce patient  
704 anxiety, alleviate further testing, and avoid radical treatment and associated  
705 morbidities.  
706

---

### 707 **6.3 Current standard of care: systematic TRUS guided biopsy**

708 The European association of Urology and NICE guidelines recommend systematic  
709 TRUS guided biopsy as the current standard of care for the diagnosis of prostate  
710 cancer [4, 17]. This procedure has several advantages: it can be delivered quickly in  
711 an outpatient clinic under local anesthetic, it can be offered at most Urology centres,  
712 and the expertise is widely distributed.

713  
714 Limitations of systematic TRUS guided biopsy are as follows: the procedure requires  
715 the operator to take 10-12 samples in the peripheral zone, where it is thought that  
716 the majority of prostate cancer can be found (See Appendix 2) [18]. The ultrasound  
717 guidance used during the procedure is useful for visualizing the prostate and  
718 assessing the location of the needle within the prostate but has a poor ability to  
719 discriminate tumour from normal tissue [19], which means that the systematic TRUS  
720 guided biopsy can potentially miss some cancer. Systematic TRUS guided biopsy has  
721 been shown to have a high false negative rate of 30-45% [20, 21]. As a systematic  
722 TRUS guided biopsy is not specifically targeted to the location of a suspected  
723 significant cancer, there is also a greater chance that a significant cancer may be  
724 missed.

### 725 **6.4 The emerging role of MRI in prostate cancer diagnosis and** 726 **treatment**

#### 727 **6.4.1 The role of imaging in prostate cancer diagnosis**

728 Although used to diagnose many other solid organ cancers such as breast, renal and  
729 colorectal cancer, imaging is not part of the traditional prostate cancer diagnostic  
730 pathway. Imaging in prostate cancer, is typically limited to stage the disease  
731 following histological diagnosis. Magnetic resonance imaging (MRI) is used in many  
732 centres to assess for extra-capsular extension during prostate cancer staging. In the  
733 past five years however, the possibility of using multi-parametric MRI (MPMRI) for  
734 diagnosing prostate cancer prior to biopsy, has generated tremendous interest [22].

#### 735 **6.4.2 Limitations of early MRI studies in prostate cancer**

736 Early literature reported conflicting results on the ability of MRI to detect prostate  
737 cancer. A recent systematic review of the literature showed that the quality of  
738 studies evaluating MRI was disappointing [22]. Limitations of reported studies  
739 include:

- 740 • **Poor reporting standards.** Many early studies failed to closely follow  
741 published guidelines for the standards of reporting of diagnostic studies  
742 (STARD) [23].
- 743 • **Biopsy artifact.** The majority of early studies evaluated MRI after biopsy.  
744 Evidence has shown that post-biopsy hemorrhage can remain for several  
745 months and affect interpretation of the image [24].
- 746 • **Poor reference standards.** Many early studies use systematic TRUS guided  
747 biopsy as a reference standard, which due to its limitations, can influence the  
748 validity of the index test of MRI. Using radical prostatectomy specimens as  
749 reference standards can lead to a selection bias, as MRI is only validated in  
750 men with disease characteristics that require radical prostatectomy. Further,

---

751 correlation of radical prostatectomy specimen with an MRI image is not  
752 without difficulty given the shrinkage (10-20%), distortion, absent perfusion,  
753 orientation and tissue loss as a result of specimen trimming.

- 754 • **Incomplete analysis of the prostate.** Many early studies only evaluate the  
755 validity of MRI in the peripheral zone, even though studies have shown that  
756 around 25% of prostate cancers may be located in the transition zone [18].
- 757 • **Segmentation.** Many early studies artificially divide the prostate into a  
758 number of segments in order to increase the amount of data obtained and  
759 the power of the analysis. Segments should not be treated as independent  
760 regions of interest, and this should be factored into the analysis.  
761

### 762 **6.4.3 Emerging role of MRI in the diagnosis of prostate cancer**

763 Since the publication of these early reports, improvements in diagnostic technology  
764 have changed the field and more evidence supporting the role of pre-biopsy MRI has  
765 been published. Magnetic field strength has increased from 0.5 Tesla to 1.5 Tesla  
766 and 3.0 Tesla. The introduction of shorter pulse sequences allows faster image  
767 acquisition and the addition of functional sequences including magnetic resonance  
768 spectroscopy (MRS), diffusion weighted imaging (DWI) and dynamic contrast  
769 enhanced imaging (DCE). Clinicians are increasingly aware of and are accounting for  
770 biopsy artifacts.

771  
772 The combination of anatomical sequences (T2-weighted imaging) and functional  
773 sequences (MRS and/or DWI and/or DCE) is termed multi-parametric MRI.  
774 Combining the sequences improves the validity of the test [25, 26].  
775

776 A systematic review determined that 60% of men with a clinical suspicion of prostate  
777 cancer will have a suspicious area identified on MRI [27]. In studies correlating MRI  
778 with radical prostatectomy specimens, MRI demonstrates sensitivity, specificity,  
779 positive predictive value and negative predictive value of 90%, 88%, 77% and 95%  
780 respectively for the identification of prostate tumours greater than 0.5ml [28].  
781 Systematic reviews and meta-analysis of recent studies have demonstrated  
782 sensitivity and specificity consistently between 70-90% for the detection of clinically  
783 significant prostate cancer [26, 29-31].  
784

785 As a result of this accumulating evidence, MRI is increasingly used in clinical practice  
786 in the diagnostic pathway for prostate cancer. The results of MRI can influence the  
787 decision to perform a prostate biopsy, as well as the technique and targeting used  
788 during the biopsy.  
789

790 MRI has tremendous potential to enhance the outcome of men on active  
791 surveillance. 30% of men diagnosed with low risk prostate cancer (Gleason 6, PSA <  
792 10) harbor higher-grade disease. This occult high-grade disease "*the wolf in sheep's  
793 clothing*", is responsible for the 3-5% of prostate cancer deaths that have been  
794 reported in long term surveillance series that did not incorporate MRI [32, 33]. The  
795 early use of MRI in men on surveillance has the potential both to reduce the need  
796 for confirmatory biopsies, and to identify the *wolf in sheep's clothing* earlier, prior to  
797 the development of metastasis.



---

798

799 This was the rationale for the very successful ASIST study, which recently successfully  
800 completed its accrual. The ASIST study was led by Dr. Klotz (PI), and sponsored *in*  
801 *toto* by the Ontario Institute of Cancer Research. The project was managed by the  
802 Canadian Urology Research Consortium (CURC). It randomized 273 men recently  
803 diagnosed with low risk prostate cancer, on surveillance, between systematic  
804 confirmatory biopsy and MRI with targeted and systematic biopsy. The primary end  
805 point, similar to PRECISE, was the proportion of men in each group with Gleason 7 or  
806 higher prostate cancer. The study had numerous secondary end points and  
807 correlative science components. We expect to report the initial results by 3Q 2016.  
808 We believe that the success and potential impact of the ASIST trial has created  
809 strong momentum to proceed with the PRECISE trial, which has even greater  
810 potential to substantially influence prostate cancer screening and diagnosis.

#### 811 **6.4.3.1 MRI can influence the decision to perform a prostate biopsy**

812 With reported negative predictive values of 95% [28, 34, 35], MRI can help  
813 determine whether a prostate biopsy is necessary; if the MRI does not identify a  
814 suspicious area the biopsy can be avoided. Using MRI, 40-50% of men referred with  
815 clinical suspicion of prostate cancer might avoid a biopsy [27]. The recent National  
816 Institute for Health Research (NIHR) Health Technology Assessment (HTA) report  
817 [11] acknowledged the value of MRI in this context. The NIHR HTA report suggests  
818 that using MRI to reduce the number of men who undergo biopsy, can be cost  
819 effective despite the costs associated with MRI [11]. Cost savings for the publically  
820 funded health care system accrue as a result of reduced number of biopsies and  
821 costs of attendant complications, and reduced treatment of clinically insignificant  
822 cancer.

#### 823 **6.4.3.2 MRI can influence the biopsy technique**

824 For men who receive a MRI scan and then go on to biopsy of the prostate, the MRI  
825 information is used to influence the prostate biopsy technique. This is known as MRI-  
826 targeted biopsy (MRI-TB) of the prostate, and can be carried out in a number of  
827 ways.

828

829 The biopsy operator can use the MRI images or report to direct biopsies into the  
830 area of the prostate where the tumour is located. The location of the tumour on the  
831 MRI (carried out in advance) is registered to the real-time ultrasound images with  
832 the use of software (software assisted registration or image-fusion) or without the  
833 use of software (visual registration or cognitive registration), while the prostate is  
834 visualized in real-time using transrectal ultrasound. MRI-TB can also be conducted  
835 directly “in-bore”, where the biopsy is conducted within an MRI scanner where the  
836 target identified on MRI during a prior diagnostic scan is biopsied using guidance  
837 from serial MRI scans during the biopsy procedure, performed in an open magnet.

838

839 For the PRECISE study, the biopsy will be performed using an image fusion-targeting  
840 device. Two devices have been FDA approved: the Artemis, made by Eigen, and the  
841 Urostation, made by Koelis. These devices import the MR target into the TRUS  
842 image, and direct the biopsy needle into the target.

---

#### 843 **6.4.4 Prostate cancer detection rates of MRI-targeted biopsy are** 844 **similar to other methods**

845 A systematic review determined that 60% of men with a clinical suspicion of prostate  
846 cancer will have a suspicious area identified on MRI [27]. One study found that a  
847 prostate biopsy strategy using only MPMRI-targeted cores resulted in the same  
848 detection rate of clinically significant cancer as 20-sector transperineal biopsies [36].  
849 Other studies also show that a targeted-alone approach would detect a similar  
850 amount of clinically significant cancer when compared to a 10-12 core systematic  
851 TRUS guided biopsy [37]. A targeted-alone approach detects 17% less clinically  
852 insignificant cancer compared to systematic TRUS guided biopsy [38].

853  
854 The detection rates achieved with a targeted-alone biopsy strategy require fewer  
855 biopsy cores than systematic TRUS guided biopsy. Thus on a per-core analysis,  
856 targeted biopsy is more efficient than systematic TRUS guided biopsy, with cancer  
857 detected in 30% of all targeted cores in a pooled analysis of 1252 targeted cores  
858 compared to 7% of all systematic TRUS guided biopsy cores in a pooled analysis of  
859 5441 systematic cores [27]. As well, the MRI targeted biopsy provides more material  
860 for histopathological analysis as the maximum cancer core length obtained from  
861 targeted biopsies can be greater than that obtained from systematic biopsies[37].

862  
863 Robust comparative evidence from randomized controlled trials is needed to  
864 determine if MRI scans can improve our ability over systematic TRUS guided biopsy  
865 to diagnose clinically significant cancer and our ability to avoid detecting clinically  
866 insignificant cancer.

867

#### 868 **6.4.5 Limitations of studies reporting MPMRI-targeted prostate biopsy**

869 Despite encouraging results of MRI-targeted biopsy, it is not yet part of routine  
870 clinical practice for prostate cancer diagnosis. Most existing studies have cohort  
871 study designs which make interpretation difficult as they do not conform well to  
872 STARD [23] recommendations [27]. Limitations of these studies include:

- 873 • **Broad definition of the study population.** The cancer detection rates depend on  
874 the prevalence of the condition in the population being investigated. This varies  
875 amongst men with no prior biopsy, prior negative biopsy and prior positive  
876 biopsy. In many studies the detection rates are not attributable to a clearly  
877 defined population.
- 878 • **MRI conduct and reporting.** The detail in which MRI is conducted and  
879 interpreted varies greatly amongst published studies.
- 880 • **Reporting of cancer detection.** The cancer detection by systematic and targeted  
881 cores is not always presented separately and cancer detection is not always  
882 specified by clinical significance. These are both essential in order to evaluate the  
883 technique.

884 There is a strong need for a randomized controlled trial comparing MRI-targeted  
885 biopsy to systematic TRUS guided biopsy so that the role of this technique in clinical  
886 practice can be established.

---

## 887 **6.5 Novelty of PRECISE**

888 PRECISE is the first randomized study in biopsy-naïve men in which men are  
889 randomized to an MRI targeted-alone biopsy arm (i.e. no biopsies of MR-normal  
890 areas of prostate and no biopsy at all if the MR is non-suspicious) or a systematic  
891 TRUS guided biopsy arm. This will allow evaluation of the efficacy of the MRI-  
892 targeted biopsy approach in the detection of clinically significant cancer. In order to  
893 evaluate a biopsy technique that could replace standard of care, the standard of care  
894 test, i.e. systematic TRUS guided biopsy, must be included in one of the arms to  
895 allow a direct comparison.

896

897 Other constituencies with an interest in MRI in prostate cancer (University College,  
898 London; Lille, France; Oslo, Norway; Heidelberg, Germany; New York University, New  
899 York) have considered similar studies, however in these centres MRI has largely  
900 replaced systematic TRUS guided biopsy, notwithstanding the lack of evidence to  
901 date. As a result, these centres have acknowledged that randomization to a standard  
902 biopsy arm (ie systematic TRUS guided biopsy) would no longer be feasible as  
903 equipoise has been lost.

904

905 In Ontario, and in almost all other Canadian provinces, prostate MPMRI is not  
906 recommended for the indication of an elevated PSA in men who have not had a  
907 biopsy. In this country, men at risk for prostate cancer, in almost all cases, proceed  
908 to a TRUS guided systematic biopsy. We believe that the opportunity to avoid a  
909 biopsy will make entry into this trial very appealing to potential candidates. Further,  
910 the barriers, both financial and physical, to obtaining a quality MRI outside of the  
911 health care system are substantial. Thus we believe men who are randomized to the  
912 systemic biopsy arm will in almost all cases proceed with biopsy avoiding significant  
913 contamination (i.e. men randomized to the systematic biopsy arm seeking out an  
914 MRI instead).

915

## 916 **7. Trial objectives**

### 917 **7.1 Overall aim**

918 The aim of this study is to assess the efficacy of MRI-targeted biopsy compared to  
919 standard of care systematic TRUS guided biopsy in the detection of clinically  
920 significant and clinically insignificant prostate cancer in men without prior biopsy.  
921 The implication of this trial is that MRI-targeted biopsy could replace systematic  
922 TRUS guided biopsy as the standard of care in the diagnosis of prostate cancer.

### 923 **7.2 Hypotheses**

924 The proportion of men with clinically significant cancer detected by MRI-targeted  
925 biopsy will be no less than that detected by systematic TRUS guided biopsy.

### 926 **7.3 Primary Objective**

927 To determine whether the proportion of men with clinically significant cancer  
928 (Gleason  $\geq$  7) detected by MRI-targeted biopsy is no less than systematic TRUS  
929 guided biopsy.

---

## 930 **7.4 Secondary Objectives**

- 931 14. To determine whether the proportion of men with clinically significant cancer  
932 (Gleason  $\geq 7$ ) detected by MRI-targeted biopsy is greater than systematic TRUS  
933 guided biopsy.
- 934 15. Proportion of men in each arm with clinically insignificant cancer detected.
- 935 16. Proportion of men in each arm with Gleason  $\geq 4+3$  detected.
- 936 17. Proportion of men in MRI arm who avoid biopsy.
- 937 18. Proportion of men in the MRI arm whom the PI-RADS score for suspicion of  
938 clinically significant cancer was 3, 4 or 5 but no clinically significant cancer was  
939 detected.
- 940 19. Proportion of men in each arm who go on to definitive local treatment (e.g.  
941 radical prostatectomy, radiotherapy, brachytherapy) or systemic treatment (e.g.  
942 hormone therapy, chemotherapy).
- 943 20. Maximal cancer core length of the most involved biopsy core (maximum cancer  
944 core length, MCCL) in each arm.
- 945 21. Total contiguous cancer core length of the most involved biopsy core (contiguous  
946 maximum cancer core length, CMCCCL) excluding intervening normal regions.
- 947 22. Proportion of men with a negative MRI who develop a positive MRI and/ or  
948 Gleason  $\geq 7$  cancer by 2 years.
- 949 23. Proportion of men with post-biopsy adverse events
- 950 24. Health-related quality of life scores.
- 951 25. Proportion with Gleason grade upgrading in men undergoing radical  
952 prostatectomy.
- 953 26. To determine the cost per diagnosis of cancer.  
954

## 955 **7.5 Explanation for non-inferiority hypothesis**

956 Due to the putative advantages of MRI-TB in reducing the number of men who  
957 require a biopsy, reducing the number of cores required in each man who is  
958 biopsied, more accurate representation of disease burden, less insignificant disease  
959 detected and reducing the number of men at risk of complications of biopsy, the  
960 primary outcome of detection of clinically significant cancer in each arm will be  
961 compared using a non-inferiority hypothesis. Even if a similar amount of clinically  
962 significant cancer is identified by MRI-TB to systematic TRUS guided biopsy, these  
963 advantages would support the use of MRI-TB instead of systematic TRUS guided  
964 biopsy in clinical practice.  
965

## 966 **7.6 Anticipated timeline of study progression**

967 The study will commence once sponsorship, ethical approval and local approvals  
968 have been obtained at a participating site and once site initiation training has  
969 occurred and a letter of site activation has been issued from the coordinating centre.  
970 Additional sites may join after the study has commenced. At this time, five sites will  
971 participate. Assuming a minimum recruitment rate of 3-6 men per site per month,  
972 recruitment will be complete by 24 months, if not sooner. If accrual is slower than  
973 expected, an additional 1-2 sites will be recruited for year 2.  
974

| Month | Number of Sites | Total recruitment |
|-------|-----------------|-------------------|
| 0     | 2               | 0                 |
| 3     | 4               | 18-36             |
| 6     | 5               | 54-108            |
| 9     | 5               | 99-198            |
| 12    | 5               | 144-288           |
| 15    | 5               | 189-378           |
| 18    | 5               | 234-468           |
| 21    | 5               | 279-558           |
| 24    | 5               | 324-648           |

975

## 976 **8. Study Population**

### 977 **8.1 Number of Subjects**

978 Approximately 450 men with a clinical suspicion of prostate cancer, based on PSA or  
979 results of digital rectal exam, with no prior biopsy will be eligible for participation.

980 Subjects must satisfy all inclusion and exclusion criteria. A sufficient number will be  
981 enrolled (estimate: 450) to achieve at least 211 completed subjects per arm.

### 982 **8.2 Subject inclusion criteria**

983 In order to be eligible, all inclusion criteria must be met:

- 984 1. Men at least 18 years of age referred with clinical suspicion of prostate cancer  
985 who have been advised to have a prostate biopsy;
- 986 2.  $\geq 5\%$  chance of high-grade prostate cancer as calculated using individualized risk  
987 assessment of prostate cancer calculator, PCPTRC 2.0, found at  
988 <http://deb.uthscsa.edu/URORiskCalc/Pages/calcs.jsp>;
- 989 3. Serum PSA  $\leq 20$ ng/ml within 3 months of randomization
- 990 4. Fit to undergo all procedures listed in protocol;
- 991 5. Able to provide written informed consent.

### 992 **8.3 Subject exclusion criteria**

993 Men who meet the following criteria at the time of screening will be excluded:

- 994 1. Prior prostate biopsy
  - 995 2. Prior treatment for prostate cancer
  - 996 3. Contraindication to MRI (e.g. claustrophobia, pacemaker, estimated GFR  $\leq$   
997 50mls/min)
  - 998 4. Contraindication to prostate biopsy
  - 999 5. Men in whom artifact would reduce the quality of the MRI, i.e. previous hip  
1000 replacement surgery, metallic hip replacement or extensive pelvic orthopaedic  
1001 metal work
  - 1002 6. Unfit to undergo any procedures listed in protocol.
- 1003

---

1004 **9. Study design**

1005 **9.1 Study design**

1006 The study is a multi-centre, open-label randomized controlled trial, with men  
1007 randomized in a 1:1 ratio to one of two arms (see Trial Schema, section 9.2). Men in  
1008 Arm A will undergo a MRI followed by either a targeted biopsy of suspicious areas or  
1009 will be followed for two years if there is no suspicious areas identified by MRI. The  
1010 unbiopsied men will have a repeat MRI at 2 years. Men in Arm B will undergo a 12-  
1011 core systematic TRUS guided biopsy. All men in the study will be followed for two  
1012 years or until they have had radical treatment (whichever comes first).

1013

1014  
1015  
1016

## 9.2 Study Trial Schema

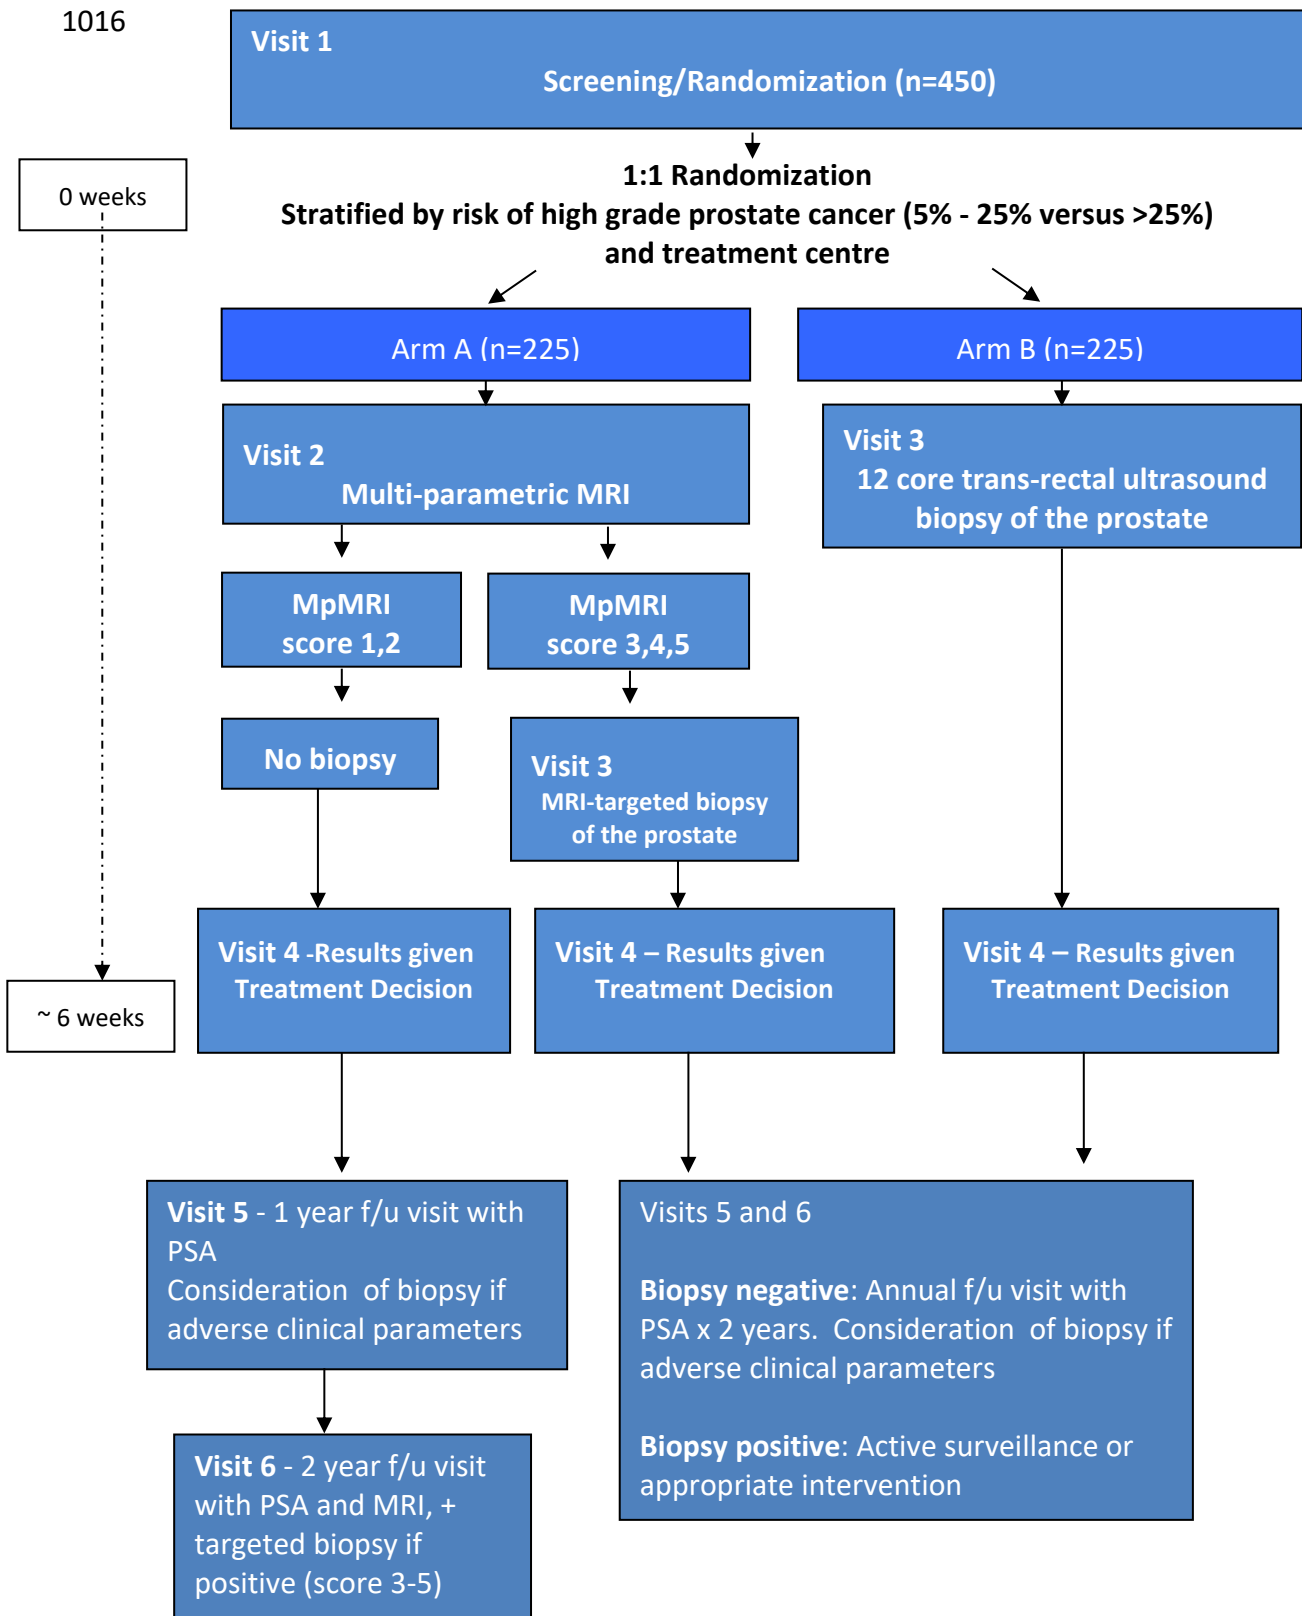

1017 **9.3 Timeline of subject contact**

1018 Tables 1, 2 and 3 illustrate the three individual subject pathways possible in the trial.  
 1019 The individual pathway that each subject experiences is dependent on both the arm  
 1020 he is randomized to and results of the tests.

1021

1022 **Table 1: ARM A: Men randomized to MRI arm who have a normal MRI and do not**  
 1023 **require a biopsy**

|                                                      | Contact with Subject * all study assessments should be conducted +/- 30 days of scheduled visits |                                  |             |              | Visit 3 | Visit 4 Post-Test | Visit 5 1 year follow up | Visit 6 2 year follow up |
|------------------------------------------------------|--------------------------------------------------------------------------------------------------|----------------------------------|-------------|--------------|---------|-------------------|--------------------------|--------------------------|
|                                                      | Visit 0 Telephone consult                                                                        | Visit 1 Screening/ Randomization | Visit 2 MRI | Visit 3      |         |                   |                          |                          |
| <b>Weeks:</b>                                        | -1                                                                                               | 0                                | 1           | 2            | 5       | 52                | 104                      |                          |
| Tele-consult                                         | X                                                                                                |                                  |             | Not required |         |                   |                          |                          |
| Consent                                              |                                                                                                  | X                                |             |              |         |                   |                          |                          |
| Screening (eligibility review)                       |                                                                                                  | X                                |             |              |         |                   |                          |                          |
| Randomization                                        |                                                                                                  | X                                |             |              |         |                   |                          |                          |
| EQ-5D-5L                                             |                                                                                                  | X                                | X           |              |         | X                 |                          | X                        |
| Optional blood, urine, and semen sample <sup>1</sup> |                                                                                                  | X                                |             |              |         |                   | X                        | X                        |
| PSA <sup>2</sup>                                     |                                                                                                  | X                                |             |              |         |                   | X                        | X                        |
| Systematic TRUS guided biopsy                        |                                                                                                  |                                  |             |              |         |                   |                          |                          |
| MRI                                                  |                                                                                                  |                                  | X           |              |         |                   | X                        | X                        |
| MRI-Targeted Biopsy                                  |                                                                                                  |                                  |             |              |         |                   |                          | X if target              |
| Immediate post MRI/TRUS Fusion Biopsy Questionnaire  |                                                                                                  |                                  | X           |              |         |                   |                          |                          |
| Immediate post-biopsy questionnaire                  |                                                                                                  |                                  |             |              |         |                   |                          |                          |
| Follow up for results of tests                       |                                                                                                  |                                  |             |              |         | X                 |                          |                          |
| Treatment decision <sup>3</sup>                      |                                                                                                  |                                  |             |              |         | X                 |                          |                          |
| 30-day post-biopsy questionnaire                     |                                                                                                  |                                  |             |              |         |                   |                          |                          |
| 30-day post MRI/TRUS Fusion Biopsy Questionnaire     |                                                                                                  |                                  |             |              | X       |                   |                          |                          |
| AE/SAE                                               | Complete as required at any time following registration                                          |                                  |             |              |         |                   |                          |                          |
| Withdrawal Form                                      | Complete as required at any time following registration                                          |                                  |             |              |         |                   |                          |                          |



---

1024 <sup>1</sup> Collected at baseline, and annually.  
1025 <sup>2</sup>PSA will have been done prior to visit 1(within 3 months of randomization, but can be  
1026 repeated at visit 1 if necessary.  
1027 <sup>3</sup>After treatment decision men revert to standard of care.  
1028

1029  
1030

**Table 2: ARM A: men randomized to MRI arm who have a lesion on MRI and require a biopsy**

|                                                     | Contact with Subject * all study assessments should be conducted +/- 30 days of scheduled visits |                                                         |                |                   |                      |                             | Visit 5<br>1 year follow up | Visit 6<br>2 year follow up |
|-----------------------------------------------------|--------------------------------------------------------------------------------------------------|---------------------------------------------------------|----------------|-------------------|----------------------|-----------------------------|-----------------------------|-----------------------------|
|                                                     | Visit 0<br>Telephone consult                                                                     | Visit 1<br>Screening/Randomization                      | Visit 2<br>MRI | Visit 3<br>Biopsy | Visit 4<br>Post-test | Visit 5<br>1 year follow up |                             |                             |
| <b>Weeks:</b>                                       | -1                                                                                               | 0                                                       | 1              | 2                 | 6                    | 52                          | 104                         |                             |
| Tele-consult                                        | X                                                                                                |                                                         |                |                   |                      |                             |                             |                             |
| Consent                                             |                                                                                                  | X                                                       |                |                   |                      |                             |                             |                             |
| Screening (eligibility review)                      |                                                                                                  | X                                                       |                |                   |                      |                             |                             |                             |
| Randomization                                       |                                                                                                  | X                                                       |                |                   |                      |                             |                             |                             |
| EQ-5D-5L                                            |                                                                                                  | X                                                       | X              | X                 | X                    |                             | X                           |                             |
| Optional blood, urine and semen sample <sup>1</sup> |                                                                                                  | X                                                       |                |                   |                      | X                           | X                           |                             |
| PSA <sup>2</sup>                                    |                                                                                                  | X                                                       |                |                   |                      | X                           | X                           |                             |
| Systematic TRUS guided biopsy                       |                                                                                                  |                                                         |                |                   |                      |                             |                             |                             |
| MRI                                                 |                                                                                                  |                                                         | X              |                   |                      |                             |                             |                             |
| MRI-Targeted Biopsy                                 |                                                                                                  |                                                         |                | X                 |                      |                             |                             |                             |
| Immediate post MRI/TRUS Fusion Biopsy Questionnaire |                                                                                                  |                                                         | X              |                   |                      |                             |                             |                             |
| Immediate post-biopsy questionnaire                 |                                                                                                  |                                                         |                | X                 |                      |                             |                             |                             |
| Follow up for results of tests                      |                                                                                                  |                                                         |                |                   | X                    |                             |                             |                             |
| Treatment decision <sup>3</sup>                     |                                                                                                  |                                                         |                |                   | X                    |                             |                             |                             |
| 30-day post-biopsy questionnaire                    |                                                                                                  |                                                         |                |                   | X                    |                             |                             |                             |
| 30-day post MRI/TRUS Fusion Biopsy Questionnaire    |                                                                                                  |                                                         |                |                   |                      |                             |                             |                             |
| AE/SAE                                              |                                                                                                  | Complete as required at any time following registration |                |                   |                      |                             |                             |                             |
| Withdrawal Form                                     |                                                                                                  | Complete as required at any time following registration |                |                   |                      |                             |                             |                             |

1031 <sup>1</sup> Collected at baseline and annually.

1032 <sup>2</sup>PSA will have been done prior to visit 1, but can be repeated at visit 1 if necessary.

1033 <sup>3</sup>After treatment decision men revert to standard of care and will be followed at year 1 and  
1034 year 2.

1035  
1036

**Table 3: ARM B: men randomized to systematic TRUS guided biopsy arm**

|                                                     | Contact with Subject * all study assessments should be conducted +/- 30 days of scheduled visits |                                                         |              |                   |                            |                             |                             |   |
|-----------------------------------------------------|--------------------------------------------------------------------------------------------------|---------------------------------------------------------|--------------|-------------------|----------------------------|-----------------------------|-----------------------------|---|
|                                                     | Visit 0<br>Telephone consult                                                                     | Visit 1<br>Screening/Randomization                      | Visit 2      | Visit 3<br>Biopsy | Visit 4<br>Post-test visit | Visit 5<br>1 year follow up | Visit 6<br>2 year follow up |   |
| <b>Weeks:</b>                                       | -1                                                                                               | 0                                                       | 1            | 2                 | 6                          | 52                          | 104                         |   |
| Tele-consult                                        | X                                                                                                |                                                         | Not Required |                   |                            |                             |                             |   |
| Consent                                             |                                                                                                  | X                                                       |              |                   |                            |                             |                             |   |
| Screening(eligibility review)                       |                                                                                                  | X                                                       |              |                   |                            |                             |                             |   |
| Randomization                                       |                                                                                                  | X                                                       |              |                   |                            |                             |                             |   |
| EQ-5D-5L                                            |                                                                                                  | X                                                       |              |                   | X                          | X                           |                             | X |
| Optional blood, urine and semen sample <sup>1</sup> |                                                                                                  | X                                                       |              |                   |                            |                             | X                           | X |
| PSA <sup>2</sup>                                    |                                                                                                  | X                                                       |              |                   |                            |                             | X                           | X |
| Systematic TRUS guided biopsy <sup>3</sup>          |                                                                                                  |                                                         |              |                   | X                          |                             |                             |   |
| MRI                                                 |                                                                                                  |                                                         |              |                   |                            |                             |                             |   |
| MRI-Targeted Biopsy                                 |                                                                                                  |                                                         |              |                   |                            |                             |                             |   |
| Immediate post MRI/TRUS Fusion Biopsy Questionnaire |                                                                                                  |                                                         |              |                   |                            |                             |                             |   |
| Immediate post-biopsy questionnaire                 |                                                                                                  |                                                         |              |                   | X                          |                             |                             |   |
| Follow up for results of tests                      |                                                                                                  |                                                         |              |                   |                            | X                           |                             |   |
| Treatment decision <sup>4</sup>                     |                                                                                                  |                                                         |              |                   |                            | X                           |                             |   |
| 30-day post-biopsy questionnaire                    |                                                                                                  |                                                         |              |                   |                            | X                           |                             |   |
| 30-day post MRI/TRUS Fusion Biopsy Questionnaire    |                                                                                                  |                                                         |              |                   |                            |                             |                             |   |
| AE/SAE                                              |                                                                                                  | Complete as required at any time following registration |              |                   |                            |                             |                             |   |
| Withdrawal Form                                     |                                                                                                  | Complete as required at any time following registration |              |                   |                            |                             |                             |   |

1037  
1038  
1039

<sup>1</sup> Collected at baseline and annually.  
<sup>2</sup> PSA will have been done prior to visit 1 (within 3 months of randomization, but can be repeated at visit 1 if necessary).

---

1040 <sup>3</sup>The biopsy must be done within one month of randomization.

1041 <sup>4</sup>After treatment decision men revert to standard of care and will be followed up at year 1  
1042 and year 2.

1043

## 1044 **10. Trial Interventions and procedures**

1045

1046 The following procedures will be applied as necessary to subjects enrolled in both  
1047 arm of the trial.

### 1048 **10.1 EQ-5D-5L Questionnaires**

1049

#### 1050 **For all subjects enrolled in trial**

1051 Once enrolled into the study, all men will be asked to fill out an EQ-5D-5L  
1052 questionnaire (Appendix 4), which is a validated 2-page questionnaire which aims to  
1053 evaluate health related quality of life. It takes approximately 2 minutes to complete.

- 1054 • All subjects should complete the baseline questionnaire at the screening visit  
1055 before leaving the department.
- 1056 • Subjects randomized into the MRI arm will be given an EQ-5D-5L questionnaire  
1057 to fill out 24-48 hours following the MRI.
- 1058 • Subjects undergoing MRI-targeted biopsy or a systematic TRUS guided biopsy will  
1059 be given an EQ-5D-5L questionnaire to fill out 24-48 hours following the biopsy.  
1060 Subjects will be given the questionnaire before they leave the department and  
1061 the patient should take this home. Subjects can return the completed  
1062 questionnaire to the investigator by post in a pre-addressed envelope provided  
1063 by the investigator. It cannot be filled out immediately after the procedure in the  
1064 department as it assesses domains such as washing, dressing and carrying out  
1065 usual activities, which cannot be established immediately after the biopsy.  
1066 Subjects will be reminded by the biopsy operator to complete the questionnaire  
1067 at home and may be given a phone call by the research team to remind them to  
1068 complete the questionnaire.
- 1069 • Subjects undergoing MRI-targeted biopsy or a systematic TRUS guided biopsy will  
1070 be given an EQ-5D-5L questionnaire to fill out at 30 days post biopsy. If the  
1071 patient was in the MRI arm and did not have a biopsy they will have been given a  
1072 30-day post MRI EQ-5D-5L, which should be filled out at 30-days post MRI. The  
1073 date that the patient should fill out the questionnaires should be written on top  
1074 of the questionnaire. (This can also be done at Visit 4).
- 1075 • All subjects should complete the EQ-5D-5L questionnaire at the 2 year follow up  
1076 visit.

### 1077 **10.2 Multiparametric MRI imaging procedure**

#### 1078 **For subjects in Arm A only**

1079

##### 1080 **10.2.1 MRI Protocol**

1081 A non-endorectal coil MRI will be carried out in 3.0 Tesla scanner with a pelvic  
1082 phased array coil and an automated injector system with the subject in the supine  
1083 position. T2-weighted (T2W), diffusion weighted (DWI) and dynamic contrast

---

1084 enhanced (DCE) scans will be acquired as per the requirements set out by PI-RADS  
1085 v2.

1086

1087 Within the specified PiRads-2 framework a common protocol will be formulated by a  
1088 consensus of the radiologists involved in the trial at each site at a startup meeting.

1089 The highest agreed upon b-value image for DWI (at least 1400s/mm<sup>2</sup>) will be  
1090 selected for all sites to ensure consistency. Similarly, the spatial resolution, contrast  
1091 media, injection rates and dynamic scanning temporal resolution will be matched for  
1092 all sites. An optional multi b value DWI acquisition will be undertaken as well to  
1093 allow for ancillary studies into non log linear apparent diffusion coefficient (ADC)  
1094 models for tumor characterization.

### 1095 **10.2.2 MRI reporting**

1096 The MRI will be reported by an experienced radiologist using the MRI Reporting  
1097 Proforma (See Appendix 2) to be filed in the study folder. The subject's clinical  
1098 details such as PSA and DRE results will be available to the radiologist. The MPMRI  
1099 will be scored based on the PI-RADS v2 scoring system [2].

1100

1101 Lesions in the prostate will be scored on the following scale:

1102 PI-RADS 1 – Very low (clinically significant cancer is highly unlikely to be  
1103 present)

1104 PI-RADS 2 – Low (clinically significant cancer is unlikely to be present)

1105 PI-RADS 3 – Intermediate (the presence of clinically significant cancer is  
1106 equivocal)

1107 PI-RADS 4 – High (clinically significant cancer is likely to be present)

1108 PI-RADS 5 – Very high (clinically significant cancer is highly likely to be  
1109 present)

1110 An additional category will be added called PI-RADS 3M. This is a bilateral diffuse  
1111 multifocal pattern of restricted diffusion and low or intermediate T2 signal in the  
1112 peripheral zone without a clearly definable lesion with a concomitant PSA density of  
1113 >0.15 based on an MRI volume calculation.

1114

1115 The location of the suspicious areas in the prostate should be marked on a diagram  
1116 of the prostate (see Appendix 2) and the sector numbers containing each suspicious  
1117 area should be recorded in the case report form.

1118

1119 Imaging interpretation will be carried out at each site, however ensuring consistency  
1120 and quality of imaging interpretation is crucial. A central imaging site will be  
1121 designated with a lead radiologist (Sunnybrook, MH). A single radiologist at each site  
1122 will perform the interpretation of all images for that site. The designated radiologist  
1123 must have experience of interpreting at least 200 MRI's using PI-RADS 1 or 2. A  
1124 startup meeting involving all radiologists will be held prior to start of accrual where  
1125 each site will bring 5 MRI cases performed at their site for consensus review, scoring  
1126 and discussion. This will provide a commonality of approach to interpretation among  
1127 the radiologists before the study begins. After this startup meeting each site will  
1128 send one set of MRI images and its interpretation for central review for site  
1129 qualification.

1130

---

1131 A copy of all images will be sent on CD to the central site for archiving.

### 1132 **10.3 Immediate post MRI/TRUS Fusion Biopsy questionnaire**

#### 1133 **For subjects in Arm A only**

1134 A modified version of a self-reported questionnaire validated previously [39] will be  
1135 completed immediately post-MRI (Appendix 5). The subject should complete the  
1136 immediate post-MRI questionnaire before they leave the department.

### 1137 **10.4 No target identified on MPMRI (PiRads 1 or 2)**

#### 1138 **For subjects in Arm A only, who do not require a biopsy**

1139 Men who have MRIs that do not identify any suspicious lesion will not receive a  
1140 biopsy. These subjects will benefit from being part of the trial as a result of not  
1141 having to undergo an invasive biopsy procedure, avoiding the discomfort associated  
1142 with the procedure, the risk of being diagnosed with clinically insignificant cancer  
1143 and the risk of sepsis associated with the biopsy procedure. Studies suggest that if  
1144 the MRI does not identify areas suspicious for cancer there is an 85-95% chance that  
1145 clinically significant cancer is not present [28, 34, 35].

1146  
1147 As soon as the results of the MRI are discussed with the subject, their treatment  
1148 decision will be recorded and they will return to standard of care management. As  
1149 part of standard of care these subjects can undergo further PSA surveillance and / or  
1150 prostate biopsies if indicated.

### 1151 **10.5 30 Day Post-MRI/TRUS Fusion Biopsy questionnaire (PiRads 1 or 2)**

#### 1152 1153 **For subjects in Arm A only, who do not require a biopsy**

1154 If an MRI does not identify any suspicious areas and a decision for no biopsy has  
1155 been made, a 30-day post MRI questionnaire should be given to the subject  
1156 (Appendix 6). This is a modified version of a self-reported questionnaire validated  
1157 previously [39]. Though the side effects typically seen after prostate biopsy are not  
1158 expected after an MRI alone, it is important to ensure that this data is captured to  
1159 allow both arms to be compared.

1160  
1161 This questionnaire should be completed at 30-days post-MRI.

1162  
1163 **If the subject is to undergo a biopsy as part of the trial protocol, they do not need**  
1164 **to complete the post-MRI 30-day questionnaire as a specific 30-day post-biopsy**  
1165 **questionnaire should be completed instead.**

### 1166 **10.6 MRI-Targeted biopsy**

#### 1167 **For subjects in Arm A who do require a biopsy**

#### 1168 **10.6.1 MRI choice of targets for targeted biopsy**

1169 Men whose prostates contain a suspicious area with a PI-RADS score of 3,4 or 5 will  
1170 subsequently undergo targeted biopsy by a Urologist or Radiologist experienced in  
1171 MRI-targeted biopsy. Operator experience (number of targeted biopsies performed

---

1172 to date) will be recorded before each procedure. The number of biopsy operators  
1173 should be kept to the minimum number possible.

1174

1175 Targets will be stratified by PI-RADS score and if the same score then by size and  
1176 labeled T1, T2, T3...etc. If there are more than 3 lesions with a score of 3 or more  
1177 only T1-T3 will be targeted. The radiologist should record the sectors involved with  
1178 tumor in order of most to least involved using the PI-RADS v2 sector scheme.

1179 The number of biopsy operators should be kept to the minimum number possible.  
1180

1181 Patients in the MRI cohort will not have systematic biopsies, with one exception.  
1182 Those whose MRI is grade 3M (a multifocal pattern suggesting multifocal small  
1183 volume cancer, with PSA Density >0.15 and no focal lesion), a systematic 12 core  
1184 biopsy will be conducted.

### 1185 **10.6.2 MRI Biopsy**

1186 The procedure will be performed in the outpatient departments of sites possessing  
1187 the required equipment by a clinician competent in TRUS/MRI-targeted biopsy. An  
1188 operator must have performed at least 50 targeted biopsy cases on the TRUS/MRI  
1189 fusion system at their institution before they are qualified to participate as an  
1190 operator in the study.

1191

1192 Coumarin anticoagulant, clopidogrel treatment and other relevant  
1193 anticoagulants/antiplatelets will be discontinued up to 10 days before biopsy and  
1194 advice sought as to appropriate substitutes if indicated. Aspirin will be continued at  
1195 the discretion of the physician doing the biopsy.

1196

1197 Prophylactic quinolone antibiotics shall be given as per local guidelines. Biopsies will  
1198 be performed via the trans-rectal route or via the trans-perineal route depending  
1199 upon local practice.

1200

1201 Targeted biopsies should be performed by software-assisted fusion devices (i.e.  
1202 (Artemis, made by Eigen, or Urostation, by Koelis) [34, 36, 37, 40, 41]. This software  
1203 is safe and poses no risks to the subject since the same CE-marked ultrasound  
1204 probes that are designed to perform the biopsy when performed as standard of care  
1205 biopsy are used during targeted biopsy. Should the operator wish to not use the  
1206 information provided by the software registration system and use cognitive (visual)  
1207 registration alone they can do so, but should indicate this on the subject's case  
1208 report form.

1209

1210 The samples per target will be 4 cores spread across the target region for a  
1211 maximum total of 12 cores as a maximum of 3 targets can be identified. Biopsies  
1212 should be conducted in order meaning T1 then T2 then T3.

1213

1214 Biopsy cores from different suspicious areas will be aliquoted separately. The vials  
1215 will be labeled "T1a-d", "T2a-d" and "T3a-d" (according to how many targets there  
1216 are) which should match the assignment of suspicious areas by the radiologist on the  
1217 MRI report. The order of lettering a-d should match the order in which the biopsies  
1218 were performed in each region. The first biopsy should be at the center of the target

---

1219 and the remaining fanning out from the center. Each core from the same suspicious  
1220 area must be submitted separately. Alternative methods of storing cores that allow  
1221 identification of the order of score samples from each target are acceptable.

## 1222 **10.7 Systematic TRUS guided biopsy**

### 1223 **For all subjects in Arm B**

1224 Systematic TRUS guided biopsy is the current standard of care for the diagnosis of  
1225 prostate cancer [4, 17]. Systematic TRUS guided biopsy can be performed at the local  
1226 site of recruitment.

1227

1228 A clinician competent in systematic TRUS guided biopsy will perform the procedure.  
1229 The experience of the operator (number of systematic TRUS guided biopsies  
1230 performed to date) will be recorded prior to each procedure. Software that guides  
1231 clinicians in placing biopsy cores should not be used.

1232

1233 Coumarin anticoagulant, clopidogrel treatment and other relevant  
1234 anticoagulant/antiplatelet medication will be discontinued 5 to 10 days before  
1235 biopsy and advice sought as to appropriate substitutes if indicated. Aspirin will be  
1236 continued at the discretion of the physician doing the biopsy.

1237

1238 The patient will be positioned in left lateral position. 10-12 core biopsies will be  
1239 taken as per guidelines [42] under appropriate anaesthesia. Biopsies will be directed  
1240 to the peripheral zone (See Appendix 3 for standardized method for conducting 12-  
1241 core systematic TRUS guided biopsy). Prophylactic quinolone antibiotics shall be  
1242 given as per local guidelines.

## 1243 **10.8 Pathology**

1244 The 2005 International Society of Urological Pathology guidelines for Gleason  
1245 Grading of Prostatic Carcinoma will be followed [43].

1246

1247 For men undergoing MRI-targeted biopsy it is required that pathology reported per  
1248 suspicious area targeted and per targeted core. For systematic TRUS guided biopsy,  
1249 each core will be reported and graded. As there are variations across sites in  
1250 methods for determination of maximum cancer core length (MCCL) of a single core,  
1251 MCCL will be reported by both of commonly used methods, measurement with and  
1252 without the benign intervening stroma.

## 1253 **10.9 Post-procedural care**

### 1254 **For all subjects in ARMS A and B receiving a biopsy**

1255 After a biopsy procedure the patient can be discharged. The subject will be given  
1256 advice and a leaflet on what to expect post-procedurally and when to contact a  
1257 healthcare professional if concerned. Subjects will be given a follow-up appointment  
1258 within 2-3 weeks for results of the histopathology and treatment options to be  
1259 discussed.

## 1260 **10.10 Immediate post-biopsy questionnaire**

### 1261 **For all subjects in ARMS A and B receiving a biopsy**



---

1262 A modified version of a self-reported questionnaire validated previously [39] in the  
1263 assessment of post-biopsy complications will be completed immediately post-biopsy  
1264 after MRI-TB and after systematic TRUS guided biopsy (Appendix 7). The subject  
1265 should complete the immediate post-biopsy questionnaire before they leave the  
1266 department. It aims to assess intensity of discomfort and pain associated with the  
1267 procedure.

### 1268 **10.11 30-day post-biopsy questionnaire**

#### 1269 **For all subjects in ARMS A and B receiving a biopsy**

1270 A modified version of a self-reported questionnaire validated previously [39] in the  
1271 assessment of post-biopsy complications at 30 days post-biopsy should be given to  
1272 all subjects undergoing MRI-TB or systematic TRUS guided biopsy to take home  
1273 (Appendix 8). The patient should fill this out on day 30 following the procedure. It  
1274 should take 5 minutes to fill out. The date that the participant should complete the  
1275 questionnaire should be written on top of the questionnaire. Data on specific biopsy-  
1276 related complications including pain, fever, hematuria, hematochezia,  
1277 hematospermia, urinary retention and urinary incontinence will be recorded. Any  
1278 other adverse events will not be recorded. Contact with healthcare and resource  
1279 used data following the biopsy will also be ascertained. The completed questionnaire  
1280 can be returned to the investigator in a pre-addressed envelope.

1281  
1282 Subjects will be called at 30 days to remind them to complete this questionnaire.

### 1283 **10.12 30-day post Intervention EQ-5D-5L Questionnaire**

1284 Subjects undergoing systematic TRUS guided biopsy or MRI-TB will be given an EQ-  
1285 5D-5L questionnaire to fill out at 30-days post biopsy. If the subject was in the MRI  
1286 arm and did not have a biopsy they will have been given a 30-day post MRI EQ-5D-  
1287 5L, which should be filled out at 30-days post MRI, or can be done at Visit 4. The date  
1288 that the patient should fill out the questionnaires should be written on top of the  
1289 questionnaire.

1290  
1291 Subjects will be called at 30 days to remind them to complete this questionnaire. The  
1292 completed questionnaire can be returned to the investigator in a pre-addressed  
1293 envelope.

### 1294 **10.13 Results and treatment decision (Visit 4)**

1295 The results of the biopsies and/or MRI will be explained to the patient by the clinical  
1296 care team during this visit, which is approximately 2-3 weeks after the biopsy.

1297 The research team should record the treatment decision in the patient file.

1298 Possibilities for treatment decision include but are not limited to:

- 1299 • Further diagnostic test (e.g. PSA, biopsy, MRI)
- 1300 • Active Surveillance
- 1301 • Radical treatment (e.g. radical prostatectomy, radical radiotherapy)
- 1302 • Focal therapy (e.g. high intensity focused ultrasound, cryotherapy)
- 1303 • Hormone therapy

---

1304 **10.14 Follow up period**

1305 All study participants will be followed up for up to two years or until they have  
1306 radical treatment. Each year, subjects will be surveyed to obtain the following  
1307 information:

- 1308 • time to cancer diagnosis
- 1309 • Gleason score progression
- 1310 • time to intervention on active surveillance
- 1311 • time on active surveillance
- 1312 • PSA
- 1313

1314 **10.14.1 Indications for biopsies off protocol**

1315 For patients who are not biopsied due to a negative MRI, have negative or non-  
1316 significant systematic biopsies, or who have a positive MRI but no or non-significant  
1317 cancer on targeted biopsy, the following are guidelines for patients management  
1318 during the 2 year follow up period.

1319 It is an accepted standard of care in Ontario for patients on active surveillance or  
1320 with a prior negative biopsy who have a worsening risk profile to undergo mpMRI  
1321 followed by targeted biopsy. We propose the following guidelines for risk profile  
1322 assessment and consideration of repeat biopsy

1323 Patients should continue to be followed with semi-annual PSA and DRE. A biopsy  
1324 should be considered under one or more of the following circumstances:

- 1325 1. For men with PSA density < 0.15, biopsy if an increase in PSA density > 0.15.
- 1326 2. For men with PSA density > 0.15, or a baseline PSA > 10, biopsy if a 50% increase  
1327 in PSA in 1 year.
- 1328 3. Biopsy if a doubling of the risk of high grade cancer according to the NCI  
1329 nomogram.
- 1330 4. Biopsy if development of a suspicious nodule on DRE.  
1331
- 1332 5. For men with a positive study MRI (especially PI-rads 4 or 5) and a targeted biopsy  
1333 which was negative or showed only Gleason 6 cancer, biopsy if there is a 50% or  
1334 more increase in PSA over 1 year or a PSA density > 0.15.  
1335
- 1336 6. For men on the systematic biopsy arm which was negative or showed only  
1337 Gleason 6 cancer, biopsy if there is a 50% or more increase in PSA over 1 year or  
1338 a PSA density > 0.15. An MRI and targeted biopsy may be warranted in these  
1339 patients.

1340  
1341  
1342  
1343

These are guidelines and should be interpreted with clinical judgment.

---

1344 Follow-up will cease once treatment beyond active surveillance is undertaken  
1345 (prostatectomy, radiation therapy, focal therapy, etc.)  
1346 PSA and biopsy results will be evaluated in subjects in whom the 2 year MRI  
1347 identifies a target.

## 1348 **10.15 Additional tests for biomarker discovery - Optional**

1349 Though not related to the primary outcome of this study, this cohort represents a  
1350 unique opportunity to obtain human samples for future biomarker discovery studies.  
1351 Participants will be consented to provide a blood, urine and semen sample after the  
1352 consent and screen visit for storage and use in future biomarker studies. In addition,  
1353 men will be consented for use of the prostate biopsy tissue in the biomarker  
1354 discovery studies.

1355  
1356 We propose two initial biomarker analyses for men recruited to the PRECISE study.  
1357 First we propose testing the utility of existing validated tests, these potentially  
1358 include the Genomic Prostate Score (Oncotype Dx) [44] and a recently developed  
1359 multiple Kallikrein biomarker test [45]. We will test the hypothesis that alongside  
1360 conventional PSA measurements, the multiple Kallikrein test or other serum  
1361 biomarker test, may identify subjects whose MRI was initially negative for prostate  
1362 cancer, but who are at high risk of harboring clinically significant disease as detected  
1363 by the secondary MRI at 2 years. We will also test the association between serum  
1364 biomarkers and clinically significant or clinically insignificant prostate cancer  
1365 detected during the PRECISE study. We will also explore the potential for the  
1366 Genomic Prostate Score to provide additional information over and above Gleason  
1367 grade. These studies will be separately funded from PRECISE.

1368  
1369 Sequential blood sampling during the 2 years of follow up (prior to a 2 year MRI) will  
1370 be planned to assess markers which might identify men at higher risk of developing  
1371 prostate cancer.

### 1372 **10.15.1 Samples to be collected for future biomarker discovery work** 1373 **(Optional)**

1374 Participants will be consented to provide a blood, urine and semen sample after the  
1375 consent and screen visit for storage and use in future biomarker studies. Samples  
1376 include:

- 1377 • Blood –10mls serum, 10mls plasma, 5mls whole blood, 5mls buffy coat
- 1378 • Urine – 50mls urine
- 1379 • Semen-1-5 cc (single ejaculate)

1380 This will involve a separate patient information form and consent form.

## 1381 **10.16 Long-term data linkage – Permission to Contact**

1382 The cohort of men who consent to participate in this study represent a uniquely  
1383 characterized group. Their long-term outcomes will contribute to our understanding  
1384 of the epidemiology of prostate cancer beyond the questions being addressed in this  
1385 study.

1386

---

1387 Permission to Contact (PTC) is a feasible mechanism to engage subjects in research  
1388 programs. This will allow researchers to contact study participants in the future to  
1389 assess their willingness to respond to questionnaires. This potentially enables  
1390 research that would complement the planned long-term follow up in terms of health  
1391 status, for obtaining information about future biopsies not included in the study, and  
1392 allow assessment of quality of life.

### 1393 **10.17 End of Study**

1394 The end of study assessment comprises an essential safety evaluation that should be  
1395 completed prior to discharging any subject from the study.

- 1396 • Adverse events;
- 1397 • PSA measurement;
- 1398 • EQ-5D-5L questionnaire;
- 1399 • An MRI in those who did NOT have a biopsy;
- 1400 • Complete CRF.

### 1401 **10.18 Risks and Benefits to Participants**

1402 An important consideration of this study is that men are being randomized to one of  
1403 two biopsy techniques when it is not known which will be more effective. Both  
1404 diagnostic tests are currently used in clinical practice at the institutions involved in  
1405 the trial. Though systematic TRUS guided biopsy could be considered standard of  
1406 care, there is enough evidence to support the concept that MRI-targeted biopsy may  
1407 be at least as effective as systematic TRUS guided biopsy[27].

#### 1408 **10.18.1 Risks to subjects**

1409 The intervention proposed in this trial (MRI-biopsy) do not offer participants any  
1410 more risk than if they underwent standard of care (systematic TRUS guided biopsy)  
1411 for the diagnosis of prostate cancer.

##### 1412 **10.18.1.1 Risk of Systematic TRUS guided biopsy**

1413 Systematic TRUS guided biopsy can be associated with discomfort, haematuria,  
1414 haematospermia and dysuria in a large proportion of subjects, which is self-resolving  
1415 (See Table 4). There is a 4% risk of systemic urosepsis [46]. To minimize this risk,  
1416 urine dipstick and/or microscopy, culture and sensitivity will be checked to ensure  
1417 that men are infection-free prior to undergoing biopsy.

##### 1418 **10.18.1.2 Risks of MPMRI**

1419 MRI is associated with few risks. It is a safe procedure used in everyday clinical  
1420 practice (See Table 4). Small risks of allergic reactions are associated with the  
1421 intravenous administration of gadolinium, the contrast agent used in MRI scans. The  
1422 study uses a low molecular weight Gd chelate as a contrast agent (Gadovist, Bayer,  
1423 gadobutrol – generic). This contrast agent is used routinely for contrast enhanced  
1424 MRI and is approved by Health Canada. Patients will be screened for any  
1425 contraindications to Gd injection or to MRI as per current clinical Dept of Medical  
1426 Imaging protocols at each institution. The commonest reported sides effects are of  
1427 limited duration and mild to moderate in intensity and include headache,  
1428 vasodilation, injection site pain, nausea, dizziness, rash, and dyspnea. The incidence

1429 of these are < 1%. Severe life threatening reactions such as severe anaphylaxis occur  
 1430 very rarely, about 1:10,000-1: 100,000. These are treatable with epinephrine and  
 1431 steroids. The risk of death is <1:100,000. There is a known risk of nephrogenic  
 1432 systemic fibrosis, a potentially fatal condition in patients with impaired renal  
 1433 function, with an eGFR <30ml/min/1.73m<sup>2</sup>. These patients are ineligible for this  
 1434 study.

1435 **10.18.1.3 Risks of MRI-targeted biopsy**

1436 MRI-targeted biopsy is associated with similar risks to the standard of care  
 1437 systematic TRUS guided biopsy. As fewer biopsy cores are being taken with MRI-  
 1438 targeted biopsy, the theoretical risk of adverse events associated may be less than  
 1439 that of systematic TRUS guided biopsy. In addition, as a proportion of men may not  
 1440 require a biopsy (approximately 30%) on a group level there will be reduced number  
 1441 of men experiencing these complications, which is one of the major advantages of an  
 1442 MRI-based approach.

1443

1444 **Table 4: Adverse events associated with procedures**

1445

| Procedure<br>Side<br>Effect | Systematic TRUS<br>guided biopsy<br>(Standard of care) | MRI                                                                                                                               | MRI-targeted biopsy                                               |
|-----------------------------|--------------------------------------------------------|-----------------------------------------------------------------------------------------------------------------------------------|-------------------------------------------------------------------|
| Pain / discomfort           | Some have discomfort<br>Some have pain                 | Intravenous cannulation (to<br>allow contrast<br>administration) can cause<br>minimal discomfort                                  | Similar / reduced compared<br>to systematic TRUS guided<br>biopsy |
| Dysuria                     | Majority have dysuria<br>(self-resolving in 2-3 days)  | No                                                                                                                                | Similar / reduced compared<br>to systematic TRUS guided<br>biopsy |
| Haematuria                  | Majority (self-resolving, 2-<br>3 days)                | No                                                                                                                                | Similar / reduced compared<br>to systematic TRUS guided<br>biopsy |
| Haematospermia              | Majority (self-resolving, 1-<br>2 weeks)               | No                                                                                                                                | Similar / reduced compared<br>to systematic TRUS guided<br>biopsy |
| Erectile dysfunction        | 30% (self resolving after 1-<br>2 months)              | No                                                                                                                                | Similar / reduced compared<br>to systematic TRUS guided<br>biopsy |
| Urinary Tract<br>infection  | 1-8 %                                                  | No                                                                                                                                | Similar / reduced compared<br>to systematic TRUS guided<br>biopsy |
| Systemic urosepsis          | 2-4%                                                   | No                                                                                                                                | Similar / reduced compared<br>to systematic TRUS guided<br>biopsy |
| Urinary retention           | 1%                                                     | No                                                                                                                                | Similar / reduced compared<br>to systematic TRUS guided<br>biopsy |
| Contrast allergy            | N/A                                                    | Rare<br>< 1 in 10000 – severe<br>allergic reaction (breathing<br>problems)<br>< 1 in 2000 – moderate<br>allergic reaction (nausea | N/A                                                               |

|                                   |             |                                                                         |             |
|-----------------------------------|-------------|-------------------------------------------------------------------------|-------------|
|                                   |             | and vomiting)<br>< 1 in 250 – mild allergic<br>reaction (rash, itching) |             |
| Adverse effects of<br>antibiotics | Rare<br><1% | N/A                                                                     | Rare<br><1% |

1446

1447 **10.18.2 Benefits to subjects**

1448 Subjects enrolled in this trial will benefit from the following:

- 1449 • Subjects in both arms may benefit from receiving a diagnostic test for suspected  
1450 prostate cancer and will receive further treatment if required. The research team  
1451 will also ensure streamlined diagnostic investigations to promptly conduct the  
1452 diagnostic test and communicate the test outcome for the patient.
- 1453 • Subjects enrolled in the trial will benefit from the dedicated research team  
1454 involved in their care in addition to the clinical team normally involved in their  
1455 care.
- 1456 • Subjects will benefit from additional discussions regarding the trial, which could  
1457 increase their understanding of prostate cancer and help them to make a more  
1458 informed decision about their health.
- 1459 • Subjects randomized to the MRI arm may benefit by avoiding a biopsy. This will  
1460 remove any risk of post-biopsy infection. MRI-randomized subjects may also  
1461 benefit from a reduced probability of having a clinically insignificant prostate  
1462 cancer diagnosed. Clinically insignificant prostate cancer is often treated  
1463 definitively per patient preference despite the lack of evidence supporting the  
1464 need. All definitive local therapies for prostate cancer carry the risk of peri-  
1465 operative complications as well as long-term risk of incontinence and erectile  
1466 dysfunction.  
1467

1468 **10.19 Concomitant medications**

1469 **10.19.1 Permitted Medications**

1470 All concomitant medications taken during the study will be recorded in the CRF with  
1471 indication, dose information and dates of administration. The definition of which  
1472 medication would be considered outside the routine medical practice is up to the  
1473 discretion of the investigator. All dietary and herbal supplement usage will be  
1474 recorded in the CRF.

1475 **10.19.2 Non-Drug Therapies**

1476 Any occurrence of prostate-related surgical and/or non-surgical (or minimally  
1477 invasive) intervention during the conduct of the study will be recorded in the CRF.  
1478

---

1479 **11. Schedule of Study Visits**

1480 **11.1 Visit 0 (Telephone Consult): Telephone consult**

1481 **For all subjects enrolled in trial**

1482 The purpose of this visit is to provide potential subject with the information about  
1483 the study. Interested subjects will have an opportunity to discuss the study with  
1484 their investigator.

1485  
1486 This will occur any time from referral letter being received to the first hospital visit.  
1487 Ideally, this will be performed as soon as possible following receipt of referral.  
1488 Not all men have an opportunity to get a teleconsult prior to Visit 1. If this is the  
1489 case, then these men may still be included in the study.

1490 **11.2 Visit 1 (Screening/Randomization): Screening, Consent,  
1491 Randomization**

1492 **For all subjects enrolled in trial**

1493 Screening will occur any time following the referral of the subject. Ideally, this will be  
1494 performed as soon as possible following receipt of referral.

1495 Subjects will be consented only after they have had time to consider the study. This  
1496 may happen on the same visit as the screening visit.

1497 Randomization will happen immediately after the consent form is signed.

1498

1499 Once enrolled into the study, subjects will be asked to fill out an EQ-5D-5L  
1500 questionnaire (Appendix 4), which is a validated 2-page questionnaire representing  
1501 health related quality of life. It takes approximately 2 minutes to complete. This  
1502 questionnaire should be completed at the screening visit before the subject leaves  
1503 the clinic.

1504

1505 If a subject agrees to the optional informed consent, from randomization until any  
1506 point prior to a biopsy, optional blood, urine and semen samples will be collected for  
1507 correlative studies.

1508

1509 Even if PSA testing was done prior to Visit 1, PSA should be obtained at Visit 1.

1510

1511 **11.3 Visit 2 (MRI): ARM A, for men randomized to MRI**

1512 This will occur ideally within one week of randomization. Men will receive an MRI  
1513 (see Section 10.2.) Men will complete an Immediate post MRI Questionnaire  
1514 (Appendix 5) be completed within 24 hours of MRI, ideally immediately after MRI  
1515 prior to leaving department and an EQ-5D-5L Questionnaire (Appendix 4) to be  
1516 completed 24-48 hours post-MRI.

1517 **11.4 Visit 3 (Biopsy): ARM A, MRI-Targeted Biopsy of Prostate**

1518 **For men randomized to ARM A, who have a lesion identified by MRI.** This  
1519 appointment will follow one-two weeks of MRI.

1520

---

1521 Depending on local Urology service structure, an appointment for a biopsy may need  
1522 to be booked at the same time as the MRI is booked (i.e. immediately after  
1523 randomization) in order for a biopsy to occur in timely fashion. If the results of the  
1524 MRI show that a biopsy is not required, then the biopsy appointment can be used  
1525 instead of Visit 4 for follow up of results and treatment decision.

1526  
1527 Men with a positive MRI (i.e. PI-RADS score of 3-5) will receive a MRI targeted biopsy  
1528 of the prostate (see Section 10.6). Men will complete an Immediate Post Biopsy  
1529 Questionnaire (Appendix 7) ideally completed and returned immediately after a  
1530 biopsy, before the subject leaves the department. In addition, subject needs to  
1531 complete an EQ-5D-5L Questionnaire (Appendix 4) 24-48 hours post-biopsy.

1532  
1533 Subjects will be given a 30-day post-biopsy questionnaire to take home after biopsy  
1534 and complete as instructed on day 30 post-biopsy. This is to be returned by post or  
1535 at the 30 day follow up appointment (Visit 4). If Visit 4 is earlier than 30 days post  
1536 biopsy then this questionnaire can be given to the research team when 30 days is  
1537 finally complete. If Visit 4 is on or later than 30 days then this can be returned at the  
1538 Visit 4 appointment. As long as questionnaire is completed at 30-60 days post-  
1539 biopsy, it will be acceptable, however, the questionnaire should be completed as  
1540 close as possible to 30 days post-biopsy.

1541  
1542 At 30-days post biopsy interval, a member of the research team will call the subject  
1543 to remind them to complete and return the 30-day questionnaires.

### 1544 **11.5 Visit 3 (Biopsy): ARM B, for men randomized to a systematic** 1545 **TRUS-biopsy**

1546 **For men randomized to ARM B only.**

1547  
1548 This will occur within four weeks of randomization. Men will receive a standardized  
1549 TRUS-guided biopsy (see Section 10.7.) Men will complete an Immediate Post Biopsy  
1550 Questionnaire (Appendix 7) ideally completed and returned immediately after the  
1551 biopsy. In addition, subject needs to complete an EQ-5D-5L Questionnaire (Appendix  
1552 4) 24-48 hours post-biopsy.

1553  
1554 Subjects will be given a 30-day post-biopsy questionnaire to take home after biopsy  
1555 and completed as instructed on day 30 post-biopsy. This is to be returned by post or  
1556 at the 30 day follow up appointment (Visit 4). If Visit 4 is earlier than 30 days post  
1557 biopsy then this questionnaire can be given to the research team when 30 days is  
1558 reached. If Visit 4 is on or later than 30 days then this can be returned at the Visit 4  
1559 appointment. As long as the questionnaire is completed at 30-60 days post-biopsy, it  
1560 will be acceptable, however the questionnaire should be completed as close as  
1561 possible to 30 days post-biopsy.

1562  
1563 At 30-days post biopsy a member of the research team will call the subject to remind  
1564 them to complete and return the 30-day questionnaires.



---

1565 **11.6 Visit 4 (Post-test follow up): ARM A, for men who did not receive a**  
1566 **biopsy**

1567 This appointment will include a follow up meeting with the investigator to discuss  
1568 the results of the MRI as well as treatment decisions. This follow up should occur  
1569 after the availability of the MRI report. At this visit the subject will also complete a  
1570 30-day post intervention EQ-5D-5L Questionnaire.

1571  
1572 Subjects will complete a Post-MRI 30-day questionnaire (Appendix 8), which has  
1573 been posted to them by the research team. If Visit 4 is earlier than 30 days post MRI  
1574 then this questionnaire can be given to the research team when 30-days is finally  
1575 complete. If Visit 4 is on or later than 30 days then this can be returned at the Visit 4  
1576 appointment. As long as questionnaire is completed at 30-60 days post-MRI, it will  
1577 be acceptable, however the questionnaire should be completed as close as possible  
1578 to 30 days post-MRI.

1579  
1580 At 30-days post MRI, a member of the research team will call the subject to remind  
1581 them to complete the 30-day questionnaires.

1582 **11.7 Visit 4 (Post-test follow up): For all men who received a biopsy**

1583 This appointment will include a follow up meeting with the investigator to discuss  
1584 the results of the biopsy as well as treatment decisions. This should be completed as  
1585 soon as possible following the availability of any pathology results. The follow up  
1586 appointment should be within 1 month of the biopsy. Depending on local Urology  
1587 service structure, these results may need to be discussed at an MDT meeting to  
1588 inform treatment decision.

1589

1590 The research team should record the treatment decision in the patient file.

1591

1592 Possibilities for treatment decision include but are not limited to:

- 1593 • Further diagnostic test (e.g. PSA, biopsy, MRI)
- 1594 • Active Surveillance
- 1595 • Radical treatment (e.g. radical prostatectomy, radical radiotherapy)
- 1596 • Focal therapy (e.g. high intensity focused ultrasound, cryotherapy)
- 1597 • Hormone therapy

1598

1599 At this visit the subject will also receive a 30-day post intervention EQ-5D-5L  
1600 Questionnaire to complete. Subjects will also complete a 30-day Post Biopsy  
1601 questionnaire (Appendix 8), which has been posted to them by the research team.  
1602 The questionnaire needs to be completed on the 30<sup>th</sup> day post-intervention (i.e. post  
1603 biopsy). However it will be accepted if completed up to 72 hours prior to or after the  
1604 30<sup>th</sup> day. A telephone reminder from the research team to the subject can take  
1605 place.

1606

1607 **11.8 Visit 5 (1 year follow up): 52 week follow up**

1608 All subjects are planned to have a 52 week follow up visit.

1609 Subjects will be followed to obtain the following information on an annual basis:

- 
- 1610
- time to cancer diagnosis;
- 1611
- Gleason score progression;
- 1612
- time to intervention on active surveillance;
- 1613
- time on active surveillance;
- 1614
- results of PSA tests.
- 1615
- Time to followup biopsy and/or mpMRI if performed (see followup
- 1616
- guidelines)
- 1617
- Indication for followup biopsy
- 1618
- Was MRI performed prior to followup biopsy
- 1619
- Was the biopsy systematic, targeted only or both systematic + targets, not
- 1620
- done because of negative MRI

1621

1622 Those subjects randomized to ARM A but who did not have an MRI-targeted biopsy

1623 will have an additional MRI at Visit 6 (year 2).

## 1624 **11.9 Visit 6 (2 year follow up): End of study**

1625 All study participants will be followed for up to two years or until they undergo

1626 radical treatment

1627 Subjects will be followed to obtain the following information on an annual basis:

- 1628
- time to cancer diagnosis;
- 1629
- Gleason score progression;
- 1630
- time to intervention on active surveillance;
- 1631
- time on active surveillance;
- 1632
- results of PSA tests.
- 1633
- Time to followup biopsy and/or mpMRI if performed (see followup
- 1634
- guidelines)
- 1635
- Indication for followup biopsy
- 1636
- Was MRI performed prior to followup biopsy
- 1637
- Was the biopsy systematic, targets only or both systematic + targets,
- 1638
- not done because of negative mpMRI

1639

1640

1641 Follow-up will cease once treatment beyond active surveillance is undertaken

1642 (prostatectomy, radiation therapy, focal therapy, etc.).

1643

1644 Those subjects randomized to ARM A but who did not have an MRI-targeted biopsy

1645 will have an additional MRI at Visit 6.

1646

## 1647 **12. Randomization**

### 1648 **12.1 Randomization Procedure**

1649 Written informed consent will be obtained from all eligible subjects prior to

1650 commencing any study related procedures. The Ontario Clinical Oncology Group

1651 (OCOG) Coordinating and Methods Centre (CMC) located at the Research Centre,

1652 Juravinski Hospital and Cancer Centre, Hamilton, Ontario will centrally coordinate

---

1653 subject randomization. Subjects will be allocated to the two treatment arms in an  
1654 approximate 1:1 ratio by use of a dynamic allocation scheme [47].

1655

1656 After documentation of written informed consent and confirmation of subject  
1657 eligibility, clinical centres will randomize the subject by accessing the CMC's web-  
1658 based Interactive Registration/Randomization System (IRIS). Prior to randomization  
1659 and treatment allocation, the subjects' individualized risk of high-grade prostate  
1660 cancer, obtained using the PCPTRC 2.0 calculator found at  
1661 <http://deb.uthscsa.edu/URORiskCalc/Pages/calcs.jsp> must be determined.

## 1662 **12.2 Stratification**

1663 Eligible, consenting subjects will be stratified by: (1) individualized risk of high-grade  
1664 prostate cancer (5% to 25%, >25%); and (2) clinical centre

## 1665 **12.3 Blinding and measures taken to avoid bias**

1666 This study is unblinded, and all subjects will be aware of the treatment that they are  
1667 receiving. As the MRI scan is unique to one of the arms it will not be possible to blind  
1668 the participants or investigators as to what intervention is being received. Therefore,  
1669 participants will be informed which arm they have been allocated to. Where  
1670 possible, the data will be coded so as to blind individuals analyzing the data from  
1671 which of the groups the data was from. Summary details of randomized allocation  
1672 and outcomes will not be made available (unless specifically authorized by the Trial  
1673 Steering Committee and/or Data Monitoring Committee) in order to maintain the  
1674 overall blind of the trial.

1675

1676 Radiologists will not be blinded to patient information (e.g. PSA level) as  
1677 international guidelines recommend that this should be available to them [48].

1678 Radiologists will be aware that the patient is part of the trial. Radiology images are  
1679 stored on the hospital database.

1680

1681 Pathologists will be blinded to the cohort allocation. Concealment may be  
1682 challenging due to the different number of cores in the two groups, but this is  
1683 unavoidable. This is unlikely to represent a significant source of bias.

1684

1685

## 1686 **13. Data**

1687

1688 Type of data to be collected:

- 1689 • EQ-5D–5L questionnaires. These will measure quality of life and will be measured  
1690 continuously throughout the trial.
- 1691 • Systematic TRUS guided biopsy – pathology – categorical (e.g. Gleason grade)  
1692 and continuous data (e.g. maximum cancer core length)
- 1693 • MRI – diagram representing MRI; categorical data for areas and scores of  
1694 suspicion (e.g. Sector 1p, score of suspicion 4/5)
- 1695 • MRI-targeted biopsy – pathology – categorical (e.g. Gleason grade) and  
1696 continuous data (e.g. maximum cancer core length)

- 
- 1697 • Post-biopsy immediate and 30-day questionnaires – categorical data (e.g. fevers
  - 1698     yes/no)
  - 1699 • Treatment decisions – categorical data (e.g. radical treatment)
  - 1700 • PSA – continuous data (e.g. value of PSA in ng/ml)

1701

1702 Please see **Appendix 1** for the time window for data collection.

1703

## 1704 **14. Statistical Considerations**

### 1705 **14.1 Sample Size Calculation**

#### 1706 **STATISTICAL methods**

##### 1707 **Primary Analysis**

1708 Absolute differences in the proportion of clinically significant cancer detected  
1709 between arms will be calculated and compared using the Clopper-Pearson method.  
1710 If the lower boundary of an one-sided, 97.5% confidence interval for the difference  
1711 in detection rates of MPMRI-TB compared to systematic TRUS guided biopsy is less  
1712 than -5% then MPMRI-TB will be deemed non-inferior. In the event that the lower  
1713 bound is greater than zero, superiority can be claimed.

1714

1715 A supportive analysis will be performed by using a logistic regression model,  
1716 evaluating the odds ratio for detecting high grade cancers, adjusted for stratification  
1717 factors. MRI-guided biopsy would be considered non-inferior if the lower bound of  
1718 the two-sided, 95% confidence interval for the odds ratio exceeds 0.78. This lower  
1719 bound was calculated to approximate an absolute 5% difference of interest (NOTE:  
1720 the unadjusted odds ratio is 0.78 when treatment A is 30% and treatment B is 25%).

1721

##### 1722 **Secondary Analyses**

1723 For each secondary outcome, where appropriate, a difference in proportions with  
1724 95% CI, or a difference in means with 95% CI, as appropriate, will be presented.  
1725 Differences in the 1-year and 2-year rates along with 95% CI will be calculated for  
1726 time-to-event outcomes.

1727

1728  $\chi^2$  tests, t-tests or Wilcoxon rank sum tests, and log-rank tests will be used to test for  
1729 differences between allocation arms in secondary outcomes. Logistic regression and  
1730 Cox proportional hazards regression will be used to examine the effect of allocation  
1731 arm on outcomes, adjusted for stratification factors. All secondary outcomes will be  
1732 two-sided and statistical significance will be set at the  $\alpha=0.05$  level. No statistical  
1733 adjustments will be made due to multiple testing, however, results for secondary  
1734 outcomes will be interpreted cautiously, acknowledging that tests were performed  
1735 on secondary outcomes and numerous secondary tests were performed. Figures and  
1736 tables will be used to illustrate results of interest.

1737

##### 1738 **Treatment Allocation and Stratification**

1739 Subjects will be allocated to the two allocation arms in an approximate 1:1 ratio by  
1740 use of a dynamic allocation scheme. Specifically, the first 20 patients will be  
1741 randomly allocated to arm in an approximate 1:1 ratio. After the first 20 patients, a  
1742 biased coin method will be used, whereby the number of patients within each

---

1743 stratum will be calculated, and the next eligible patient will be allocated (with  
1744 probability  $p=0.8$ ) to the arm which reduces the imbalance. If no imbalance exists,  
1745 allocation to each arm will occur with probability  $p=0.5$ .

1746

#### 1747 Stratification

1748 For treatment allocation, the subjects' individualized risk of high-grade prostate  
1749 cancer will be determined. Risk will be assessed using the PCPTRC 2.0 calculator,  
1750 found at <http://deb.uthscsa.edu/URORiskCalc/Pages/calcs.jsp>. Eligible, consenting  
1751 subjects will be stratified by:

- 1752 (1) individualized risk of high-grade prostate cancer (5% to 25%, >25%);  
1753 (2) clinical centre.

1754

#### 1755 **Sample Size**

1756 Rates of clinically significant cancer (Gleason  $\geq 7$ ) detection from targeted-alone  
1757 biopsy in a population with no prior biopsy have been shown to be 42% [37] and  
1758 50% from another study [36].

1759

1760 Rates of clinically significant cancer detection from one the largest studies of  
1761 systematic TRUS guided biopsy in men without prior biopsy are shown to be 27%  
1762 [49]. Therefore, based on these results, it may be assumed that targeted-biopsy will  
1763 detect clinically significant cancer in >15% more men (i.e. 42% versus 27%) than  
1764 systematic TRUS guided biopsy.

1765

1766 For this study, it will be conservatively hypothesized that systematic TRUS guided  
1767 biopsy will detect clinically significant cancer in 30% of men, and targeted biopsy will  
1768 detect clinically significant cancer in 10% more men (i.e. 40% total) than systematic  
1769 TRUS guided biopsy. For the non-inferiority hypothesis, using 90% power and 2.5%  
1770 one sided-alpha, assuming a targeted biopsy detection rate of clinically significant  
1771 cancer of 40%, and a detection rate for systematic TRUS guided biopsy of 30% and  
1772 using a margin of clinical unimportance of 5%, 211 men per arm will be required. The  
1773 choice of 5% as the margin of non-inferiority represents a difference that would be  
1774 considered clinically important.

1775

1776 Thus total men required in study = **422**.

1777

1778 To account potential withdrawal / loss to follow up and the effect of stratification,  
1779 the sample size will be inflated by 5%, and a target of **450 men** will be recruited.

1780

1781 Note that the rate of clinically significant cancers is very dependent on the  
1782 population registered for this study. It is possible that fewer (or more) subjects will  
1783 have clinically significant cancers than what is initially hypothesized. However, if the  
1784 population rate of clinically significant cancers is less (i.e. the systematic TRUS guided  
1785 biopsy detection rate is <30%) and other statistical assumptions remain as stated  
1786 previously, the statistical power will increase. The minimum statistical power would  
1787 be obtained if the clinically significant cancer detection rate was 45% for systematic  
1788 TRUS guided biopsy and 55% for targeted biopsy, which would still achieve >84%  
1789 power. Therefore, the sample size is sufficient to ensure non-inferiority, even if the  
1790 rate of clinically significant cancer in the population is miss-specified, assuming an

---

1791 absolute difference of 10% between targeted and systematic TRUS guided biopsy  
1792 detection rates, and a 5% margin of non-inferiority.

1793

#### 1794 **Statistical Conventions**

1795 For categorical data, tables will be presented showing the n and percentage  
1796 (n/N\*100%) of patients. Analyses will be presented by study allocation arm  
1797 separately.

1798

1799 Duration of time will be described in either years, months or weeks, and calculated  
1800 using: (last date – first date + 1) / X, where X=365.25 for years, X=30.4 for months, or  
1801 X=7 for weeks. Example: Age (in years) will be calculated as: (randomization date –  
1802 date of birth + 1)/365.25.

1803

1804 Transformations of the data in order to meet statistical assumptions may be  
1805 considered. Type-1 error will be set to 5%. Standard diagnostic tools will be used to  
1806 assess any of the model fittings. All the statistical analysis will be carried out using  
1807 SAS version-9 and over for Windows (Cary, NC) or R version 3.2.2. ([www.r-](http://www.r-project.org)  
1808 [project.org](http://www.r-project.org)) or higher.

1809

#### 1810 **Missing Data**

1811 Missing values for the primary endpoint will be examined closely. Sources and  
1812 reasons for the absence of data incurred as a result of subjects lost-to-follow up,  
1813 dropouts, and intermittent missing values will be described and explored by various  
1814 summary statistics as well as graphical displays between the two allocation arms.  
1815 Subjects' lost-to-follow up or dropouts will be explored and the characteristics of  
1816 those subjects will be described by allocation arm and tested using Fisher's exact  
1817 tests or Wilcoxon rank sum tests.

1818

1819 Missing data for secondary endpoints will be described. The methods for evaluating  
1820 missing data of the primary endpoint may be employed for endpoints of interest. For  
1821 summarization of baseline data, the following conventions will be used for partial  
1822 missing date information occurring prior to randomization (e.g. for medical history  
1823 or prior treatment). If year is missing, the date will be set at missing. If year is  
1824 available, but month and date is missing, the month and date will be set to July 1<sup>st</sup>  
1825 of the respective year. If date is missing, but year and month available, the day will be  
1826 set to the 15<sup>th</sup> of the respective month.

## 1827 **14.2 Interim Analyses**

1828

1829 The Trial Steering Committee (TSC), Data Safety and Monitoring Committee (DSMC)  
1830 or Trial PI may recommend cessation of the trial or suggestion modifications to trial  
1831 conduct if there are concerns about patient safety or futility. Unless otherwise  
1832 specified by one of these bodies, a futility analysis will be performed after  
1833 approximately 200 subjects are enrolled and have their primary outcome  
1834 ascertained. Simulation will be used to estimate the conditional probability of futility  
1835 assuming the study was to continue to completion, and assuming the clinically  
1836 significant cancer detection rate is 30% in both arms. If the conditional probability is  
1837 0.95 or higher that continuation of the study will result in a negative result, the

---

1838 DSMC will recommend a suspension of recruitment to the trial, and initiation of a  
1839 quality assurance review. A decision to permanently close the study or continue with  
1840 accrual will be determined by the Steering Committee, based on the results of the  
1841 quality assurance review, and the recommendation of the DSMC.

1842

#### 1843 **Timing of Final Analysis**

1844 A single, final, analysis will occur after all patients have undergone their initial biopsy  
1845 and all data related to the initial biopsy is documented and validated. Follow-up  
1846 analyses will be conducted after all patients have completed two years of follow-up.

### 1847 **14.3 Populations:**

1848 The per protocol, study population will consist of all subjects who satisfy all eligibility  
1849 criteria and are randomized to the study, who undergo MPMRI-TB or systematic  
1850 TRUS guided biopsy and have their primary outcome measured. This population will  
1851 be used for the primary analysis of non-inferiority.

1852 The intent-to-treat (ITT) population will consist of all subjects randomized to the  
1853 study, regardless of any protocol violations or if they do not complete the study as  
1854 defined in the protocol. The ITT population will be used as a supportive analysis of  
1855 the primary analysis, for all safety analyses, and for any analysis investigating  
1856 superiority.

### 1857 **14.4 Primary Outcome**

#### 1858 **14.4.1 Detection rate of clinically significant cancer**

1859 The proportion of men in each arm with clinically significant cancer (Gleason  $\geq 7$ ) will  
1860 be calculated based on histology results from biopsy procedures. Analysis will be on  
1861 the intention to treat population.

1862

1863 Absolute differences in proportion of clinically significant cancer detected between  
1864 arms will be calculated and compared. If the lower boundary of the 97.5%  
1865 confidence interval for the difference in detection rates of MPMRI-TB compared to  
1866 systematic TRUS guided biopsy is less than -5% then MPMRI-TB will be deemed non-  
1867 inferior. In the event that the lower bound is greater than zero, superiority can be  
1868 claimed.

1869

1870 The primary analysis will be conducted once all patients have completed visit 4,  
1871 when the results of the biopsy or MRI are given to the patient.

1872

### 1873 **14.5 Secondary Outcomes**

1874 For each secondary outcome, where appropriate, a difference in proportions with  
1875 95% CI, or a difference in means with 95% CI, as appropriate, will be presented.

1876

#### 1877 **14.5.1 Proportion of men in each arm with clinically insignificant 1878 cancer detected**

1879 The proportion of men in each arm with clinically insignificant cancer (Gleason  $< 7$ )  
1880 will be calculated based on histology results from biopsy procedures. In addition, the

---

1881 numbers with clinically insignificant cancer identified by MRI alone will also be  
1882 included.

1883

#### 1884 **14.5.2 Proportion of men in each arm with Gleason $\geq 4+3$ detected**

1885 The proportion of men in each arm with Gleason  $\geq 4+3$  will be calculated based on  
1886 histology results from biopsy procedures. In addition, the numbers with clinically  
1887 insignificant cancer identified by MRI alone will also be included.

1888

#### 1889 **14.5.3 Proportion of men in MPMRI arm who avoid biopsy.**

1890

#### 1891 **14.5.4 Proportion of men in the MRI arm whom the PI-RADS score for 1892 suspicion of clinically significant cancer was 3, 4 or 5 but no clinically 1893 significant cancer was detected.**

1894 The proportion of men in each arm whom the PI-RADS score for suspicion of  
1895 clinically significant cancer was 3, 4 or 5 but no clinically significant cancer was  
1896 detected, will be calculated based on histology results from biopsy procedures.

1897

#### 1898 **14.5.5 Proportion of men in each arm who go on to definitive local 1899 treatment (e.g. radical prostatectomy, radiotherapy, brachytherapy) or 1900 systemic treatment (e.g. hormone therapy, chemotherapy)**

1901

#### 1902 **14.5.6 Maximal cancer core length of the most involved biopsy core 1903 (maximum cancer core length, MCCL) in each arm**

1904 This measurement is routinely conducted, and will be determined by the pathologist.

1905

#### 1906 **14.5.7 Total contiguous cancer core length of the most involved biopsy 1907 core (contiguous maximum cancer core length, CMCCL) excluding 1908 intervening normal regions**

1909 This measurement is routinely conducted, and will be determined by the pathologist.

1910

#### 1911 **14.5.8 Proportion of men with a negative MRI who progress within 24 1912 months after their study MRI, or who are upgraded within 24 months**

1913 Men with a negative MRI who do not undergo a biopsy will have a follow-up MRI 2  
1914 years after their study MRI. We will determine the proportion of men whose  
1915 subsequent MRI shows a PI-RADS 3 or greater lesion. The results of targeted biopsy  
1916 of those lesions will be recorded and analyzed. The number of men who are  
1917 upgraded to Gleason  $\geq 7$  due to an off-protocol biopsy will also be recorded.

1918

#### 1919 **14.5.9 Proportion of men with post-biopsy adverse events**

1920 Immediate post-biopsy discomfort and pain will be characterized by intensity using  
1921 the numerical analogue score. Scores for each arm will be compared. 30-day biopsy  
1922 specific complications and adverse events will be characterized according to their  
1923 presence, absence, duration and how much of a problem the symptoms caused the  
1924 subject. Whether the subject had contact with health care providers/system will also  
1925 be recorded. The proportion of individuals experiencing each symptom, proportion



---

1926 in whom that symptom caused a problem and proportion who had contact with  
1927 healthcare providers/system will be calculated and compared qualitatively between  
1928 arms utilizing classification systems validated in previous studies [39]. The biopsy  
1929 specific complications that will be compared include pain, urinary retention, fever,  
1930 pain, erectile dysfunction, urinary incontinence, haematuria, haematochezia and  
1931 haemotospermia.

1932  
1933 Any post-biopsy complications up to 30-days post biopsy procedure will be tabulated  
1934 and listed by duration and management.

1935

#### 1936 **14.5.10 Health related quality of life**

1937 EQ-5D-5L descriptive domain summary indices and visual analogue scores will be  
1938 assessed at baseline, 24-48 hours post intervention and at 30-days and changes will  
1939 be compared between arms.

1940

1941 EQ-5D was selected as a simple, low burden quality of life instrument that will  
1942 provide validated information on symptoms, particularly anxiety, that could be  
1943 compared across disease states and studies. Other patient-reported outcomes  
1944 directly linked to the interventions will be captured in the post-biopsy surveys. Since  
1945 it provides utilities, these will be incorporated into a secondary economic analysis if  
1946 the results permit.

1947

#### 1948 **14.5.11 Proportion Gleason score upgrading in men undergoing radical 1949 prostatectomy**

1950 Of the men who undergo radical prostatectomy, the proportion who have cancer  
1951 upgraded from the biopsy histopathology to the radical prostatectomy  
1952 histopathology in each arm will be calculated and compared.

1953

#### 1954 **14.5.12 Cost Outcomes**

1955 As the study design for clinical outcomes is one of non-inferiority, the primary  
1956 economic analysis will be **cost minimization analysis**. The perspective of the  
1957 economic analysis will be that of the public payer. The primary goal of the analysis  
1958 will be to support arguments for public funding. Thus the costs of participant  
1959 burden, logistical challenges, and expense of obtaining societal costs, will not be  
1960 evaluated.

1961

##### 1962 **14.5.12.1 Data collection:**

1963 As part of the informed consent process, participants will also consent to  
1964 having their Ontario Health Insurance Number recorded, to be later  
1965 transferred to the Institute for Clinical Evaluative Sciences (ICES) where it will  
1966 be linked to a number of administrative claims databases recording health  
1967 system resource utilization such as physician billing [Ontario Health Insurance  
1968 Plan (OHIP); laboratory and diagnostic tests (OHIP); hospitalization and  
1969 surgery [Discharge Abstract Database (DAD)]; medications [Ontario Drug  
1970 Benefit (ODB) Formulary, New Drug Funding Program (NDFP), and Activity  
1971 Level Reporting (ALR)]; clinic and emergency department visits [National  
1972 Ambulatory Care Reporting System (NACRS), Emergency Department visits];

---

1973 radiation (ALR); homecare (Home Care databases) and a few additional ones  
1974 as determined necessary (e.g., Long-term care, Mental Health, Diabetes. The  
1975 overall, number and proportion of health system resources will be  
1976 determined. In this way we can capture comprehensive resource utilization  
1977 related to on-trial management including any adverse events.

#### 1978 **14.5.12.2 Sample consent form language:**

1979 *I understand that my Ontario Health Insurance Plan (OHIP) number*  
1980 *will be collected and it, with information collected about me in this*  
1981 *trial, will be transferred to the Institute for Clinical Evaluative Sciences*  
1982 *and linked with routinely-collected information about my health care*  
1983 *found in health-related databases (e.g., Ontario Health Insurance Plan*  
1984 *(OHIP) physician claims database, Ontario Cancer Registry) for the*  
1985 *purpose of analyzing the health services I use (e.g., clinic visits,*  
1986 *hospitalizations, medications) and their costs. I understand that my*  
1987 *personal health information will be protected and my confidentiality*  
1988 *maintained.*

#### 1989 **14.5.12.3 Cost calculation**

1990 Once the utilization of health services is determined from those cases linked  
1991 to administrative databases, publicly available costs (2016\$CAN) will be  
1992 applied to health services. Costs for physician and laboratory services will be  
1993 determined by applying that year's fee code. Costs for hospital care will be  
1994 estimated using the Canadian Institute for Health Information (CIHI) Resource  
1995 Intensity Weight method for the most recently available year. Outpatient  
1996 prescription drug costs for participants not covered by ODB (those under age  
1997 65 and not on social assistance) will be considered to be the same as the trial  
1998 arm-specific average for those with coverage. Costs will then be inflated  
1999 using the healthcare-specific Consumer Price Index reported by Statistics  
2000 Canada into constant Canadian dollars for the year the study ends. Due to the  
2001 short time horizon, discounting will not be applied.

#### 2002 **14.5.12.4 Primary Analysis**

2003 A within-trial analysis will be conducted to calculate the total cost for each  
2004 arm and mean cost per patient for each arm. Frequency distributions and  
2005 measures of central tendency (e.g. means and medians) will be determined  
2006 for each resource category (e.g. hospitalizations) for each arm of the study.  
2007 Confidence intervals for the difference in costs and resource utilization  
2008 between the strategies overall and for each resource category will also be  
2009 calculated. Univariate comparisons between the groups will be made  
2010 primarily using nonparametric tests, such as Wilcoxon rank-sum test. In the  
2011 primary analysis, assuming equivalence in the primary outcome, an arm with  
2012 significantly lower mean costs will be considered the economically most  
2013 attractive approach.

2014  
2015 Should the clinical trial find a difference between the two arms on the  
2016 primary endpoint, an incremental cost-benefit analysis will be calculated by

---

2017 deriving the additional cost per case of clinically significant cancer diagnosed,  
2018 according to the following equation:

$$\text{Cost-benefit} = \frac{\text{Cost}_{(\text{Arm A})} - \text{Cost}_{(\text{Arm B})}}{\text{Diagnoses}_{(\text{Arm A})} - \text{Diagnoses}_{(\text{Arm B})}}$$

2019 The cost of avoiding each additional case of clinically insignificant cancer  
2020 diagnosed may also be similarly calculated. Consideration will be given to  
2021 extending this analysis using economic modeling with incorporation of utility  
2022 values from the EQ-5D to allow a lifetime perspective to be taken and the  
2023 estimation of quality adjusted life years (QALYs).

#### 2024 **14.5.12.5 Secondary Cost Analyses**

2025 One and multi-way sensitivity analyses will be carried out around major cost  
2026 drivers by varying the costs over their observed ranges and conducting  
2027 threshold analyses where appropriate. Sensitivity analyses will also be  
2028 performed to evaluate potential limitations in the data, such as ODB costs as  
2029 described above (though the proportion without ODB coverage should be  
2030 similar in the two arms, and it is not expected to be a major cost-driver).  
2031

#### 2032 **14.5.13 Missing Data**

2033 The impact of missing data will be explored in all analyses; sensitivity  
2034 analyses/multiple imputation will be performed as appropriate.  
2035

### 2036 **15. Participant compliance and withdrawal**

2037  
2038 The study will be completed when at least 422 subjects have been randomized, have  
2039 undergone a diagnostic test and completed follow up. Compliance to randomized  
2040 treatment will be assessed by monitoring the completed forms, e.g. the systematic  
2041 TRUS guided biopsy form or the MRI-targeted biopsy form.  
2042

2043 In consenting to the study, subjects are consenting to study monitoring, imaging and  
2044 biopsy procedures, follow-up, data collection and analysis. Subjects are allowed to  
2045 withdraw consent at any stage and their care will not be affected in any way. All  
2046 communication surrounding the withdrawal and its reasons should be noted in the  
2047 patient's record. Such cases should be reported to the PRECISE Study Operations  
2048 Office. Data up to the time of withdrawal can be included in the study.  
2049

2050 As the study diagnostic tests are for suspected cancer it is not anticipated that there  
2051 will be significant loss to follow up.  
2052

#### 2053 **15.1 Subject Withdrawal from Study**

2054 A subject may discontinue participation in this study at any time at the investigator's  
2055 discretion or at the request of the subject.  
2056

2057 If a subject discontinues at or before Visit 1 (randomization), he is not required to  
2058 complete end of study assessments.

---

2059

2060 If a subject discontinues after Visit 1 (randomization) for any reason, the investigator  
2061 should make every effort to complete the activities bulleted below.

2062

- 2063 • End of study assessments as outlined in **Section 10.17**.  
2064 • Any occurrence of death, prostatic surgical intervention, non-surgical treatment  
2065 for prostate cancer after study withdrawal should be documented in the CRF and  
2066 source documents.

2067

2068 Subjects who are discontinued from the study after randomization will not be  
2069 replaced. Subjects withdrawn from the study retain their subject number if already  
2070 given. New subjects will be allocated a new subject number.

2071

2072 In the event that a subject is prematurely discontinued from the study at any time  
2073 due to an AE, the procedures describe in **Section 16.3** must be followed.

2074

2075 Subjects should be withdrawn from the study for any of the following criteria:

- 2076 • Non-compliance with the requirements of the study.  
2077 • Request to discontinue treatment. This request can be made by either the  
2078 subject or the investigator.  
2079 • Develops progressive disease.

2080

## 2081 **15.2 Study completion**

2082 The primary end point will be reached when the last patient entered has their  
2083 systematic biopsy or MRI and targeted biopsy if indicated. All subjects will be  
2084 followed for up to 2 years following study entry or until they have radical treatment.  
2085 Subjects who are found to have significant prostate cancer and are treated will not  
2086 be included in follow up for this period. This includes subjects diagnosed as part of  
2087 study protocol, and subjects diagnosed during the follow up period by standard-of-  
2088 care procedures. However, post MRI/biopsy questionnaires will not be required  
2089 following non-protocol based procedures.

2090

## 2091 **16. Data Monitoring, Quality Control and Safety**

### 2092 **16.1 Stopping / discontinuation rules**

2093 The study will be completed when 450 participants have been randomized,  
2094 undergone a diagnostic test and completed follow up.

2095

2096 The Trial Steering Committee (TSC), Data Safety and Monitoring Committee (DSMC)  
2097 or Trial PI may recommend cessation of the trial or suggestion modifications to trial  
2098 conduct if there are concerns about patient safety or futility. See Section 14.2.1. for  
2099 further details on the interim analysis. Appropriate documentation as per the PI's  
2100 requirement will be completed if stopping the trial is necessary and the ethics  
2101 committee will be informed.

2102

2103 As the study is unblinded there will be no need for randomization code breaks.

2104

---

## 2105 **16.2 Monitoring, quality control and assurance**

2106

2107 Members of the trial team will be Good Clinical Practice (or equivalent) trained.

2108

2109 An independent DSMC will be appointed to monitor patient safety and the rate of  
2110 recruitment of subjects in the study. They will meet at least once a year whilst the  
2111 trial is ongoing for routine review of safety data and trial progression. They have the  
2112 power to call additional meetings and review data at any point in the trial should  
2113 they wish to do so.

2114

2115 The PI may also arrange an independent trial monitor to review the study data.

## 2116 **16.3 Assessment of safety**

2117 The investigator is responsible for the detection and documentation of events

2118 meeting the criteria and definition of an AE or SAE as provided in this protocol.

2119 During this study, when there is a safety evaluation, the investigator or site staff will

2120 be responsible for detecting AEs and SAEs, as detailed in this section of the protocol.

### 2121 **16.3.1 Definition of an Adverse Event (AE)**

2122 Adverse events (AE) will be defined as “any untoward medical occurrence in a  
2123 clinical trial subject undergoing any intervention in the trial, which does not  
2124 necessarily have a causal relationship with this treatment”.

2125

2126 Only adverse events specific to biopsy-related complications including pain, fever,  
2127 hematuria, hematochezia, hematospermia, urinary retention and urinary  
2128 incontinence will be recorded. Any other adverse events will not be recorded. Please  
2129 refer to section 16.3.6 of the protocol.

### 2130 **16.3.2 Definition of a Serious Adverse Event (SAE)**

2131 Serious adverse events (SAE) will be defined as “any untoward medical occurrence as  
2132 a result of any intervention in the trial that:

2133 **(a) results in death**

2134 **(b) is life-threatening**

2135 The term ‘life-threatening’ in the definition of ‘serious’ refers to an event in which  
2136 the subject was at risk of death at the time of the event. It does not refer to an  
2137 event, which hypothetically might have caused death, if it were more severe.

2138 **(c) requires hospitalisation or prolongation of existing hospitalisation**

2139 In general, hospitalization signifies that the subject has been detained (usually  
2140 involving at least an overnight stay) at a hospital or emergency ward for observation  
2141 and/or treatment that would not have been appropriate in the physicians’ office or  
2142 outpatient setting. Complications that occur during hospitalization are AEs. If a  
2143 complication prolongs hospitalization or fulfils any other serious criteria, the event is  
2144 serious. When in doubt as to whether ‘hospitalization’; occurred or was necessary,  
2145 the AE should be considered serious. Hospitalization for elective treatment of a pre-  
2146 existing condition that did not worsen form baseline is not considered an AE.

---

2147 **(d) results in disability / incapacity**

2148 The term disability means substantial disruption of a person's ability to conduct  
2149 normal life functions. This definition is not intended to include experiences of  
2150 relatively minor medical significance such as uncomplicated headache, nausea,  
2151 vomiting, diarrhea, influenza and accidental trauma (e.g. sprained ankle) which may  
2152 interfere or prevent everyday life functions but do not constitute a substantial  
2153 disruption.

2154 **(e) is a congenital abnormality/birth defect.**

2155 Medical or scientific judgement should be exercised in deciding whether reporting is  
2156 appropriate in other situations, such as important medical events that may not be  
2157 immediately life threatening or result in death or hospitalization but may jeopardise  
2158 the subject or may require medical or surgical intervention to prevent one of the  
2159 outcomes listed in the above definition. These should also be considered serious.  
2160 Examples of such events are invasive or malignant cancers, intensive treatment in an  
2161 emergency room or at home for allergic bronchospasm, blood dyscrasias or  
2162 convulsions that do not result in hospitalization, or development of drug  
2163 dependence or drug abuse.

2164 **16.3.3 Disease-Related Events or Outcomes Not Qualifying as SAEs**

2165 An event which is part of the natural course of the disease under study (i.e., disease  
2166 progression) does not need to be reported as a serious adverse event. Progression of  
2167 the subject's neoplasia will be recorded in the clinical assessments in the CRF. Death  
2168 due to progressive disease is to be recorded on 'Record of Death' CRF page and not  
2169 as an SAE. However, if the progression of the underlying disease is greater than that  
2170 which would normally be expected for the subject, or if the investigator considers  
2171 that there was a causal relationship between treatment with study medication or  
2172 protocol design/procedures and the disease progression, then this must be reported  
2173 as an SAE. Any new primary cancer must be reported as an SAE.

2174 **16.3.4 Lack of Efficacy**

2175 "Lack of efficacy" will not be reported as an AE. The signs and symptoms or clinical  
2176 sequelae resulting from lack of efficacy will be reported if they fulfill the AE or SAE  
2177 definition (including clarifications).

2178 **16.3.5 Clinical Laboratory Abnormalities and Other Abnormal**  
2179 **Assessments as AEs and SAEs**

2180 Abnormal laboratory findings or other abnormal assessments that are judged by the  
2181 investigator as **clinically significant** (CS) will be recorded as AEs or SAEs if they meet  
2182 the definition of an AE or SAE. Clinically significant abnormal laboratory findings or  
2183 other abnormal assessments that are detected during the study or are present at  
2184 baseline and significantly worsen following the start of the study will be reported as  
2185 AEs or SAEs. However, clinically significant abnormal findings or other abnormal  
2186 assessments that are associated with the disease being studied, unless judged by the  
2187 investigator as more severe than expected for the subject's condition or that are  
2188 present or detected at the start of the study and do not worsen, will not be reported  
2189 as AEs or SAEs.  
2190

---

2191 The trial interventions are routinely carried out in clinical practice for investigation of  
2192 suspected cancer and the risks of the interventions are therefore not any greater  
2193 than if a man was not part of the trial. The risks of the procedures are relatively low,  
2194 as detailed in Section 11.

2195  
2196 The investigator will exercise his or her medical and scientific judgment in deciding  
2197 whether an abnormal laboratory finding or other abnormal assessment is clinically  
2198 significant.

### 2199 **16.3.6 Recording/Reporting AEs and SAEs**

2200 The first AE reporting period for this study begins at randomization and  
2201 will be recorded until 30-days post-biopsy. In the event that the subject does not  
2202 undergo biopsy, AEs and SAEs should be recorded until 30-days post MRI.

2203  
2204 Only adverse events specific to biopsy-related complications including pain, fever,  
2205 hematuria, hematochezia, hematospermia, urinary retention and urinary  
2206 incontinence will be recorded. Any other adverse events will not be recorded.

2207  
2208 AEs will be recorded by a member of the research team or clinical team on an AE  
2209 report form. All SAEs must be recorded on a SAE report form. Completed AEs and  
2210 SAE report forms should be sent to the CTG who will keep a log of AEs and SAEs. AE  
2211 and SAE logs will be reviewed by the DSMC.

2212  
2213 For the purposes of this study, only those AEs deemed POSSIBLY, PROBABLY, or  
2214 DEFINITELY related to the study procedures (ie, MRI or biopsy), or meets the criteria  
2215 as a SAE, will be collected and reported.

2216  
2217 Expected AEs includes the following:

- 2218 • Pain
- 2219 • Blood in the urine
- 2220 • Blood in the semen
- 2221 • Blood in the stool or back passage
- 2222 • Erectile dysfunction
- 2223 • Urinary incontinence
- 2224 • Urinary tract infection
- 2225 • Fevers

2226  
2227 In addition, small risks of allergic reactions are associated with the intravenous  
2228 administration of gadolinium, the contrast agent used in MRI scans, as described in  
2229 section 10.18.1.2. This contrast agent is used consistently in MRI scanning and is not  
2230 limited to this trial.

2231  
2232 If any of these symptoms are accompanied by events consistent with the definition  
2233 of an SAE as specified above, then the event will be considered an SAE.

2234  
2235 The Trial Coordinator, Principle Investigator or Chief Investigator should be informed  
2236 of any SAE within 24 hours.

---

2237 All SAE report forms must be completed and the SAE logs updated. All SAEs must be  
2238 followed up until a resolution is reached (i.e. recovered, recovering, recovered with  
2239 sequelae, fatal, not recovered or unknown).

2240

2241 Local sites may have specific institutional protocols for reporting SAEs, which should  
2242 be followed in addition.

2243

2244 When an AE/SAE occurs, it is the responsibility of the investigator to review all  
2245 documentation relative to the event. The investigator will then record all relevant  
2246 information regarding an AE/SAE on the CRF.

2247

2248 The investigator will attempt to establish a diagnosis of the event based on signs,  
2249 symptoms and/or other clinical information. In such cases, the diagnosis should be  
2250 documented as the AE/SAE and not the individual signs/symptoms.

### 2251 **16.3.7 Evaluating AEs and SAEs**

#### 2252 **16.3.7.1 Assessment of Intensity**

2253

2254

2255

2256 The investigator will make an assessment of intensity for each AE and SAE reported  
2257 during the study. Degree of severity and change in severity will be recorded by  
2258 means of National Cancer Institute, Common Terminology Criteria for Adverse  
2259 Events (NCI CTCAE), version 4.03.

2260

2261 If the event is not listed in the NCI CTCAE (v.4.03), the assessment will be based on  
2262 the investigator's clinical judgment. The intensity of each AE and SAE recorded in the  
2263 CRF should be assigned to one of the following categories:

2264

2265 **Mild:** An event that is easily tolerated by the subject, causing minimal discomfort  
2266 and not interfering with everyday activities.

2267 **Moderate:** An event that is sufficiently discomfoting to interfere with normal  
2268 everyday activities.

2269 **Severe:** An event that prevents normal everyday activities.

2270

2271 An event that is classified as severe should not be confused with a SAE. Severity is a  
2272 category utilized for rating the intensity of an event; both AEs and SAEs can be  
2273 assessed as severe.

#### 2274 **16.3.7.2 Assessment of Causality**

2275 The investigator is obligated to assess the relationship between investigational  
2276 product and the occurrence of each AE/SAE. The investigator will use clinical  
2277 judgment to determine the relationship. Alternative causes and the temporal  
2278 relationship of the event to the investigational product will be considered and  
2279 investigated. The investigator will also consult the CIB and or Product Information,  
2280 for marketed products, in the determination of his/her assessment.



---

2281 **16.3.8 Follow-up of AEs and SAEs**

2282 After the initial AE/SAE report, the investigator is required to proactively follow each  
2283 subject and provide further information to the PI of the study, on the subject's  
2284 condition.

2285

2286 All AEs and SAEs documented at a previous visit/contact and are ongoing, will be  
2287 reviewed at subsequent visits/contacts.

2288

2289 All AEs and SAEs will be followed until resolution, until the condition stabilizes, until  
2290 the event is otherwise explained or until the subject is lost to follow-up. Once  
2291 resolved, the appropriate AE/SAE CRF page(s) will be updated. The investigator will  
2292 ensure that follow-up includes any supplemental investigations as may be indicated  
2293 to elucidate the nature and/or causality of the AE or SAE.

2294

2295 The PI may request that the investigator perform or arrange for the conduct of  
2296 supplemental measurements and/or evaluations to elucidate as fully as possible the  
2297 nature and/or causality of the AE or SAE. The investigator is obligated to assist. If a  
2298 subject dies during participation in the study or during a recognized follow-up  
2299 period, the PI will be provided with any post-mortem findings.

2300

2301 New or updated information will be recorded on the originally completed SAE CRF,  
2302 with all changes signed and dated by the investigator or designate. The updated SAE  
2303 CRF should be resent to the PI.

2304 **16.3.9 Prompt Reporting of SAEs**

2305 Once the investigator determines that an event meets the protocol definition of an  
2306 SAE, the SAE will be reported to the PI (CURC) within 24 hours.

2307

2308 **16.3.9.1 Responsibility for Reporting Serious Adverse Events to PI**

2309 The Site Investigator must immediately inform the PI (CURC) of all SAE (within 24  
2310 hours) at the following fax number: 1-416-480-6121.

2311

2312 The PI contact list for SAE receipt, fax numbers, telephone numbers and mailing  
2313 addresses is as follows:

2314 Dr. Laurence Klotz

2315 c/o Marlene Kebabdjian

2316 Division of Urology

2317 Sunnybrook Health Sciences Centre

2318 2075 Bayview Avenue A304

2319 Toronto, Ontario M4N 3M5 Canada

2320 Phone: (416) 480-6100 ext 2890

2321 E-mail: [Laurence.Klotz@sunnybrook.ca](mailto:Laurence.Klotz@sunnybrook.ca)

2322 [Marlene.kebabdjian@sunnybrook.ca](mailto:Marlene.kebabdjian@sunnybrook.ca)

2323 **16.3.9.2 Completion and Transmission of the SAE Reports**

2324 Once an investigator becomes aware that an SAE has occurred in a study subject,  
2325 she/he will report the information to the PI within 24 hours. The SAE CRF will always

---

2326 be completed as thoroughly as possible with all available details of the event, signed  
2327 by the investigator (or designee), and forwarded to the PI within the designated time  
2328 frames. If the investigator does not have all information regarding as SAE, he/she will  
2329 not wait to receive additional information before notifying the PI of the event and  
2330 completing the form. The form will be updated when additional information is  
2331 received.

2332  
2333 The investigator will always provide an assessment of causality at the time of the  
2334 initial report as described in Section 16.3.6.2.

### 2335 **16.3.10 Post-study AEs and SAEs**

2336 If the investigator learns of any SAE at any time after a subject has been discharged  
2337 from the study, and such event(s) is (are) reasonably related to the study  
2338 intervention, the investigator should promptly notify the PI (CURC).

2339

## 2340 **17. Study Administration**

### 2341 **17.1 Regulatory and Ethical Considerations**

2342 An important consideration is that men are being randomized to one of two biopsy  
2343 techniques when it is not known which will be more effective in diagnosing clinically  
2344 significant prostate cancer. Both diagnostic tests are currently used in everyday  
2345 clinical practice at the institutions involved in the trial. Though systematic TRUS  
2346 guided biopsy could be considered standard of care, there is enough evidence to  
2347 support the concept that MPMRI-targeted biopsy may be as effective, if not more so,  
2348 than systematic TRUS guided biopsy [27]. This study aims to confirm this.

#### 2349 **17.1.1 Ethical Conduct of the Study and Ethics Approval**

2350 The PI and each participating site will obtain approval to conduct the study from the  
2351 Research Ethics Board (REB) prior to initiating the study.

2352

2353 This study will be conducted in accordance with 'good clinical practice' (GCP) and all  
2354 applicable regulatory requirements, including where applicable, the 2013 version of  
2355 the Declaration of Helsinki.

2356

2357 The investigator is responsible for ensuring that this protocol, the site's informed  
2358 consent form and any other information that will be present to potential subjects  
2359 are reviewed and approved by the appropriate REB. The investigator agrees to allow  
2360 the REB direct access to all relevant regulatory documents. The PI will provide the  
2361 site investigator(s) with relevant document(s)/data that are needed for REB review  
2362 and approval of the study. Before CRFs can be shipped to the site, the PI must  
2363 receive copies of the REB approval, the approved informed consent form and any  
2364 other information that the REB has approved for presentation to potential subjects.

2365

2366 If the protocol, the informed consent form or any other information that the REB has  
2367 approved for presentation to potential subjects is amended during the study, the  
2368 site investigator(s) is responsible for ensuring the REB reviews and approves, where  
2369 applicable, these amended documents. The site investigator(s) must follow all

---

2370 applicable regulatory requirements pertaining to the use of an amended informed  
2371 consent form including obtaining the REB approval of the amended form before new  
2372 subjects consent to take part in the study using this version of the form. Copies of  
2373 the REB approval of the amended informed consent form/other information and the  
2374 approved amended informed consent form/other information must be forwarded to  
2375 the PI promptly.

### 2376 **17.1.2 Informed Consent**

2377 Informed consent will be obtained before the subject can participate in the study.  
2378 The contents and process of obtaining informed consent will be in accordance with  
2379 all applicable regulatory requirements.

2380

2381 The subject's consent to participate in the study should be obtained after a full  
2382 explanation has been provided of the procedures to be given. Subjects should be  
2383 given sufficient time (at least 24 hours) after being given the study patient  
2384 information sheet to consider and discuss participation in the study with family and  
2385 friends.

2386

2387 A contact number will be given to the subject should he wish to discuss any aspect of  
2388 the study. Following this, the clinician will determine that the subject is fully  
2389 informed of the study and their participation, in accordance with Good Clinical  
2390 Practice Guidelines. Subjects will always be asked to sign a consent form. One copy  
2391 will be given to the subject, one copy will be kept with subject's hospital notes and  
2392 one copy should be kept in the local investigator's file.

### 2393 **17.1.3 Investigator Reporting Requirements**

2394 The investigator is responsible for reporting SAEs to the REB in accordance with all  
2395 applicable regulations. Furthermore, the investigator may be required to provide  
2396 periodic safety updates on the conduct of the study at his or her site and notification  
2397 of study closure to the REB.

## 2398 **17.2 Study Monitoring**

2399 This study will be monitored by a CRA. The CRA will contact the sites by telephone  
2400 on a predetermined basis and would conduct a monitoring visits based on the data  
2401 entered in the EDC and queries.

2402

2403 During these contacts, the monitor will:

- 2404 • Check the progress of the study
- 2405 • Review study data collected
- 2406 • Conduct source document verification
- 2407 • Identify any issues and address their resolution

2408

2409 This will be done in order to verify that the:

- 2410 • Data are authentic, accurate and complete
- 2411 • Safety and rights of subjects are being protected
- 2412 • Study is conducted in accordance with the currently approved protocol (and  
2413 any amendments), GCP and all applicable regulatory requirements

---

2414

2415 The investigator agrees to allow CRA personnel direct access to all relevant  
2416 documents and to allocate his/her time and the time of his/her staff to CRA  
2417 personnel to discuss findings and any relevant issues.

### 2418 **17.3 Quality Assurance**

2419 To ensure compliance with GCP and all applicable regulatory requirements,  
2420 regulatory agencies may conduct a regulatory inspection of the study. Such  
2421 audits/inspections can occur at any time during or after completion of the study. If  
2422 an audit or inspection occurs, the investigator and institution agree to allow the  
2423 auditor/inspector direct access to all relevant documents and to allocate his/her  
2424 time and the time of his/her staff to the auditor/inspector to discuss findings and  
2425 any relevant issues.

### 2426 **17.4 Study and Site Closure**

2427 Upon completion of the study, the site investigator(s) will conduct the following  
2428 activities:

- 2429 • Return of all study data to the Sponsor (CURC)
- 2430 • Submission of all study data and data queries to OCOG
- 2431 • Review of site study records for completeness

2432

2433 In addition, the Principal Investigator has the right to temporarily suspend or  
2434 prematurely discontinue this study either at a single site or at all sites at any time for  
2435 reasons including but not limited to, safety or ethical issues or severe non-  
2436 compliance. If the PI determines such action is needed, the PI will discuss this with  
2437 the site investigator (including the reasons for taking such action) at that time. When  
2438 feasible, the PI will provide advance notification to the site investigator of the  
2439 impending action prior to it taking effect.

2440

2441 Individual site Investigators may also terminate their participation in the study at any  
2442 time. If the investigator determines such action is needed, the investigator will  
2443 discuss this with the PI (including the reasons for taking such action) at that time.  
2444 When feasible, the investigator will provide advance notification to the PI of the  
2445 impending action prior to it taking effect.

2446

2447 The PI will promptly inform all other investigators and/or institutions conducting the  
2448 study if the study is suspended or terminated for safety reasons and will also inform  
2449 the regulatory authorities of the suspension or termination of the study and the  
2450 reason(s) for the action. If required by applicable regulations, the investigator must  
2451 inform the REB promptly and provide the reason for the suspension or termination.

2452

2453 If the study is prematurely discontinued, all study data must be returned to the PI. In  
2454 addition, the investigator has the responsibility to return any used/unused clinical  
2455 supplies.

2456

2457 Financial compensation to investigators and/or institutions will be in accordance  
2458 with the agreement established between the investigator and the PI.

---

2459 **17.5 Records Retention**

2460 Following closure of the study, the site investigator(s) must maintain all site study  
2461 records in a safe and secure location. The records must be maintained to allow easy  
2462 and timely retrieval when needed and whenever feasible, to allow any subsequent  
2463 review of data in conjunction with assessment of the facility, supporting systems and  
2464 staff.

2465  
2466 The site investigator(s) will retain study records to comply with all applicable  
2467 regulatory requirements. The minimum retention time will meet the strictest  
2468 standard applicable to that site for the study as dictated by any institutional  
2469 requirements or local laws or regulations of Health Canada standards/procedures;  
2470 otherwise, the retention period will default to 25 years.

2471  
2472 The site investigator(s) must inform the PI of any changes in the archival  
2473 arrangements, including but not limited to the following: archival at an off-site  
2474 facility, transfer of ownership of the records in the event the investigator leaves the  
2475 site. The PI should be informed of this change if it affects their access to the  
2476 information in case of an audit.

2477 **17.6 Data Management**

2478 Subject data are collected by the investigator or designee using the CRF within an  
2479 Electronic Data Capture (EDC) system. Subject data necessary for analysis and  
2480 reporting will be entered/transmitted into a validated database. Clinical data  
2481 management will be performed in accordance with applicable standards and data  
2482 cleaning procedures. Database lock will occur when data management quality  
2483 control procedures are completed.

2484 **17.7 Publication**

2485 The results from the study will be analyzed and published as soon as possible and is  
2486 appropriate. All study-related communications can only be presented or published  
2487 after approval from all relevant members involved in the trial.

2488  
2489 All publications shall include appropriate indication named authors as agreed on by  
2490 the members involved in the trial. For the main study reports, senior and first  
2491 authorship will be determined by agreement of the Chief Investigator, the Principle  
2492 Investigator at time of manuscript drafting. Authorship will be based on  
2493 recommendations of the International Committee of Medical Journal Editors  
2494 ([www.ICMJE.org](http://www.ICMJE.org)) where all authors meet the following for criteria:

- 2495  
2496 1. Substantial contributions to the conception or design of the work; or the  
2497 acquisition, analysis, or interpretation of data for the work; AND  
2498 2. Drafting the work or revising it critically for important intellectual content;  
2499 AND  
2500 3. Final approval of the version to be published; AND  
2501 4. Agreement to be accountable for all aspects of the work in ensuring that  
2502 questions related to the accuracy or integrity of any part of the work are  
2503 appropriately investigated and resolved.

---

2504

2505 If there are no named authors (i.e. group authorship) then a writing committee will  
2506 be identified that would usually include these people. The clinical trials.gov  
2507 registration number that will be allocated to this trial will be attached to any  
2508 publications resulting from this trial.

2509

2510 Trial funding agencies (OICR and others as appropriate) will be acknowledged in all  
2511 publications.

2512

2513 The members of the trial steering committee will be listed with their affiliations in  
2514 the acknowledgements/appendix of the main publication.

2515

2516

2517  
2518  
2519  
2520  
2521  
2522  
2523  
2524  
2525  
2526  
2527  
2528  
2529  
2530  
2531  
2532  
2533  
2534  
2535  
2536  
2537  
2538  
2539  
2540  
2541  
2542  
2543  
2544  
2545  
2546  
2547  
2548  
2549  
2550  
2551  
2552  
2553  
2554  
2555  
2556  
2557  
2558  
2559  
2560

---

## 18. References

1. Cooperberg MR, Carroll PR, Klotz L: **Active surveillance for prostate cancer: progress and promise.** *Journal of clinical oncology : official journal of the American Society of Clinical Oncology* 2011, **29(27):3669-3676.**
2. **PI-RADS(TM) Prostate Imaging – Reporting and Data System V.2.** In.: American College of Radiology; 2015.
3. Dickinson L, Ahmed HU, Allen C, Barentsz JO, Carey B, Futterer JJ, Heijmink SW, Hoskin PJ, Kirkham A, Padhani AR *et al*: **Magnetic resonance imaging for the detection, localisation, and characterisation of prostate cancer: recommendations from a European consensus meeting.** *Eur Urol* 2011, **59(4):477-494.**
4. Heidenreich A, Bastian PJ, Bellmunt J, Bolla M, Joniau S, van der Kwast T, Mason M, Matveev V, Wiegel T, Zattoni F *et al*: **EAU guidelines on prostate cancer. part 1: screening, diagnosis, and local treatment with curative intent-update 2013.** *Eur Urol* 2014, **65(1):124-137.**
5. Center MM, Jemal A, Lortet-Tieulent J, Ward E, Ferlay J, Brawley O, Bray F: **International variation in prostate cancer incidence and mortality rates.** *Eur Urol* 2012, **61(6):1079-1092.**
6. **American Cancer Society Prostate Cancer Key Statistics.** Accessed 1st November 2014. Accessed from: <http://www.cancer.org/cancer/prostatecancer/detailedguide/prostate-cancer-key-statistics> [<http://www.cancer.org/cancer/prostatecancer/detailedguide/prostate-cancer-key-statistics>]
7. Loeb S, Heuvel vD, Zhu X, Bangma CH, Schroder FH, Roobol MJ: **Reply from Authors re: Alexandre R. Zlotta, Robert K. Nam. To Biopsy or Not to Biopsy: Thou Shall Think Twice.** *Eur Urol* 2012;**61:11157.** *European urology* 2012, **61(6):1117-1118.**
8. Stamey TA, Freiha FS, McNeal JE, Redwine EA, Whittemore AS, Schmid HP: **Localized prostate cancer. Relationship of tumor volume to clinical significance for treatment of prostate cancer.** *Cancer* 1993, **71(3 Suppl):933-938.**
9. Ahmed HU, Hu Y, Carter T, Arumainayagam N, Lecornet E, Freeman A, Hawkes D, Barratt DC, Emberton M: **Characterizing clinically significant prostate cancer using template prostate mapping biopsy.** *J Urol* 2011, **186(2):458-464.**
10. Netto GJ: **Tumor volume threshold of insignificant prostate cancer--was Dr. Stamey right all along?** *J Urol* 2011, **185(1):10-11.**
11. Mowatt G, Scotland G, Boachie C, Cruickshank M, Ford JA, Fraser C, Kurban L, Lam TB, Padhani AR, Royle J *et al*: **The diagnostic accuracy and cost-effectiveness of magnetic resonance spectroscopy and enhanced magnetic resonance imaging techniques in aiding the**

- 
- 2561 **localisation of prostate abnormalities for biopsy: a systematic review**  
2562 **and economic evaluation.** *Health technology assessment* 2013,  
2563 **17(20):vii-xix, 1-281.**
- 2564 12. Morash C, Tey R, Agbassi C, Klotz L, McGowan T, Srigley J, Evans A:  
2565 **Active surveillance for the management of localized prostate cancer:**  
2566 **Guideline recommendations.** *Canadian Urological Association journal =*  
2567 *Journal de l'Association des urologues du Canada* 2015, **9(5-6):171-178.**
- 2568 13. Wilt TJ, Brawer MK, Jones KM, Barry MJ, Aronson WJ, Fox S, Gingrich  
2569 JR, Wei JT, Gilhooly P, Grob BM *et al*: **Radical prostatectomy versus**  
2570 **observation for localized prostate cancer.** *N Engl J Med* 2012,  
2571 **367(3):203-213.**
- 2572 14. Litwin MS, Lubeck DP, Spitalny GM, Henning JM, Carroll PR: **Mental**  
2573 **health in men treated for early stage prostate carcinoma: a**  
2574 **posttreatment, longitudinal quality of life analysis from the Cancer of**  
2575 **the Prostate Strategic Urologic Research Endeavor.** *Cancer* 2002,  
2576 **95(1):54-60.**
- 2577 15. Dall'Era MA, Albertsen PC, Bangma C, Carroll PR, Carter HB, Cooperberg  
2578 MR, Freedland SJ, Klotz LH, Parker C, Soloway MS: **Active surveillance**  
2579 **for prostate cancer: a systematic review of the literature.** *Eur Urol*  
2580 2012, **62(6):976-983.**
- 2581 16. Wilt TJ, MacDonald R, Rutks I, Shamliyan TA, Taylor BC, Kane RL:  
2582 **Systematic review: comparative effectiveness and harms of**  
2583 **treatments for clinically localized prostate cancer.** *Annals of internal*  
2584 *medicine* 2008, **148(6):435-448.**
- 2585 17. **CG58 Prostate cancer: NICE guidance**  
2586 [<http://guidance.nice.org.uk/CG58/NICEGuidance/pdf/English>]
- 2587 18. Nevoux P, Ouzzane A, Ahmed HU, Emberton M, Montironi R, Presti Jr  
2588 JC, Villers A: **Quantitative tissue analyses of prostate cancer foci in an**  
2589 **unselected cystoprostatectomy series.** *BJU Int* 2011.
- 2590 19. Sedelaar JP, Vijverberg PL, De Reijke TM, de la Rosette JJ, Kil PJ,  
2591 Braeckman JG, Hendriks AJ: **Transrectal ultrasound in the diagnosis of**  
2592 **prostate cancer: state of the art and perspectives.** *Eur Urol* 2001,  
2593 **40(3):275-284.**
- 2594 20. Scattoni V, Zlotta A, Montironi R, Schulman C, Rigatti P, Montorsi F:  
2595 **Extended and saturation prostatic biopsy in the diagnosis and**  
2596 **characterisation of prostate cancer: a critical analysis of the literature.**  
2597 *Eur Urol* 2007, **52(5):1309-1322.**
- 2598 21. Djavan B, Ravery V, Zlotta A, Dobronski P, Dobrovits M, Fakhari M, Seitz  
2599 C, Susani M, Borkowski A, Boccon-Gibod L *et al*: **Prospective evaluation**  
2600 **of prostate cancer detected on biopsies 1, 2, 3 and 4: when should we**  
2601 **stop?** *J Urol* 2001, **166(5):1679-1683.**
- 2602 22. Ahmed HU, Kirkham A, Arya M, Illing R, Freeman A, Allen C, Emberton  
2603 M: **Is it time to consider a role for MRI before prostate biopsy?** *Nat*  
2604 *Rev Clin Oncol* 2009, **6(4):197-206.**



- 
- 2605 23. Bossuyt PM, Reitsma JB, Bruns DE, Gatsonis CA, Glasziou PP, Irwig LM,  
2606 Lijmer JG, Moher D, Rennie D, de Vet HC: **Towards complete and**  
2607 **accurate reporting of studies of diagnostic accuracy: the STARD**  
2608 **initiative.** *Clin Radiol* 2003, **58**(8):575-580.
- 2609 24. White S, Hricak H, Forstner R, Kurhanewicz J, Vigneron DB, Zaloudek CJ,  
2610 Weiss JM, Narayan P, Carroll PR: **Prostate cancer: effect of postbiopsy**  
2611 **hemorrhage on interpretation of MR images.** *Radiology* 1995,  
2612 **195**(2):385-390.
- 2613 25. Tanimoto A, Nakashima J, Kohno H, Shinmoto H, Kuribayashi S:  
2614 **Prostate cancer screening: the clinical value of diffusion-weighted**  
2615 **imaging and dynamic MR imaging in combination with T2-weighted**  
2616 **imaging.** *J Magn Reson Imaging* 2007, **25**(1):146-152.
- 2617 26. Kirkham AP, Emberton M, Allen C: **How good is MRI at detecting and**  
2618 **characterising cancer within the prostate?** *Eur Urol* 2006, **50**(6):1163-  
2619 1174; discussion 1175.
- 2620 27. Moore CM, Robertson NL, Arsanious N, Middleton T, Villers A, Klotz L,  
2621 Taneja SS, Emberton M: **Image-guided prostate biopsy using magnetic**  
2622 **resonance imaging-derived targets: a systematic review.** *Eur Urol*  
2623 2013, **63**(1):125-140.
- 2624 28. Villers A, Puech P, Mouton D, Leroy X, Ballereau C, Lemaitre L: **Dynamic**  
2625 **contrast enhanced, pelvic phased array magnetic resonance imaging**  
2626 **of localized prostate cancer for predicting tumor volume: correlation**  
2627 **with radical prostatectomy findings.** *J Urol* 2006, **176**(6 Pt 1):2432-  
2628 2437.
- 2629 29. Wu LM, Xu JR, Ye YQ, Lu Q, Hu JN: **The clinical value of diffusion-**  
2630 **weighted imaging in combination with T2-weighted imaging in**  
2631 **diagnosing prostate carcinoma: a systematic review and meta-**  
2632 **analysis.** *AJR Am J Roentgenol* 2012, **199**(1):103-110.
- 2633 30. Wu LM, Xu JR, Gu HY, Hua J, Chen J, Zhang W, Zhu J, Ye YQ, Hu J:  
2634 **Usefulness of diffusion-weighted magnetic resonance imaging in the**  
2635 **diagnosis of prostate cancer.** *Acad Radiol* 2012, **19**(10):1215-1224.
- 2636 31. Umbehr M, Bachmann LM, Held U, Kessler TM, Sulser T, Weishaupt D,  
2637 Kurhanewicz J, Steurer J: **Combined magnetic resonance imaging and**  
2638 **magnetic resonance spectroscopy imaging in the diagnosis of prostate**  
2639 **cancer: a systematic review and meta-analysis.** *Eur Urol* 2009,  
2640 **55**(3):575-590.
- 2641 32. Yamamoto T, Musunuru B, Vesprini D, Zhang L, Ghanem G, Loblaw A,  
2642 Klotz L: **Metastatic Prostate Cancer in Men Initially Managed with**  
2643 **Active Surveillance.** *The Journal of urology* 2015.
- 2644 33. Klotz L, Vesprini D, Sethukavalan P, Jethava V, Zhang L, Jain S,  
2645 Yamamoto T, Mamedov A, Loblaw A: **Long-term follow-up of a large**  
2646 **active surveillance cohort of patients with prostate cancer.** *Journal of*  
2647 *clinical oncology : official journal of the American Society of Clinical*  
2648 *Oncology* 2015, **33**(3):272-277.

- 
- 2649 34. Hoeks CM, Somford DM, van Oort IM, Vergunst H, Oddens JR, Smits  
2650 GA, Roobol MJ, Bul M, Hambroek T, Witjes JA *et al*: **Value of 3-T**  
2651 **Multiparametric Magnetic Resonance Imaging and Magnetic**  
2652 **Resonance-Guided Biopsy for Early Risk Restratification in Active**  
2653 **Surveillance of Low-Risk Prostate Cancer: A Prospective Multicenter**  
2654 **Cohort Study.** *Invest Radiol* 2013.
- 2655 35. Abd-Alazeez M, Ahmed HU, Arya M, Charman SC, Anastasiadis E,  
2656 Freeman A, Emberton M, Kirkham A: **The accuracy of multiparametric**  
2657 **MRI in men with negative biopsy and elevated PSA level-Can it rule**  
2658 **out clinically significant prostate cancer?** *Urol Oncol* 2013.
- 2659 36. Kasivisvanathan V, Dufour R, Moore CM, Ahmed HU, Abd-Alazeez M,  
2660 Charman SC, Freeman A, Allen C, Kirkham A, van der Meulen J *et al*:  
2661 **Transperineal magnetic resonance image-targeted prostate biopsy**  
2662 **versus transperineal template prostate biopsy in the detection of**  
2663 **clinically significant prostate cancer.** *J Urol* 2012.
- 2664 37. Haffner J, Lemaitre L, Puech P, Haber GP, Leroy X, Jones JS, Villers A:  
2665 **Role of magnetic resonance imaging before initial biopsy: comparison**  
2666 **of magnetic resonance imaging-targeted and systematic biopsy for**  
2667 **significant prostate cancer detection.** *BJU Int* 2011, **108**(8 Pt 2):E171-  
2668 178.
- 2669 38. Siddiqui MM, Rais-Bahrami S, Turkbey B, George AK, Rothwax J, Shakir  
2670 N, Okoro C, Raskolnikov D, Parnes HL, Linehan WM *et al*: **Comparison**  
2671 **of MR/ultrasound fusion-guided biopsy with ultrasound-guided**  
2672 **biopsy for the diagnosis of prostate cancer.** *Jama* 2015, **313**(4):390-  
2673 397.
- 2674 39. Rosario DJ, Lane JA, Metcalfe C, Donovan JL, Doble A, Goodwin L, Davis  
2675 M, Catto JW, Avery K, Neal DE *et al*: **Short term outcomes of prostate**  
2676 **biopsy in men tested for cancer by prostate specific antigen:**  
2677 **prospective evaluation within ProtecT study.** *BMJ* 2012, **344**:d7894.
- 2678 40. Siddiqui MM, Rais-Bahrami S, Truong H, Stamatakis L, Vourganti S, Nix  
2679 J, Hoang AN, Walton-Diaz A, Shuch B, Weintraub M *et al*: **Magnetic**  
2680 **Resonance Imaging/Ultrasound-Fusion Biopsy Significantly Upgrades**  
2681 **Prostate Cancer Versus Systematic 12-core Transrectal Ultrasound**  
2682 **Biopsy.** *Eur Urol* 2013.
- 2683 41. Wysock JS, Rosenkrantz AB, Huang WC, Stifelman MD, Lepor H, Deng  
2684 FM, Melamed J, Taneja SS: **A Prospective, Blinded Comparison of**  
2685 **Magnetic Resonance (MR) Imaging-Ultrasound Fusion and Visual**  
2686 **Estimation in the Performance of MR-targeted Prostate Biopsy: The**  
2687 **PROFUS Trial.** *Eur Urol* 2013.
- 2688 42. **Undertaking a transrectal ultrasound guided biopsy of the prostate.**  
2689 **Public Health England Prostate Cancer Risk Management Programme**  
2690 **Guidelines.** [http://www.cancerscreening.nhs.uk/prostate/pcrmp-guide-](http://www.cancerscreening.nhs.uk/prostate/pcrmp-guide-1.html)  
2691 [1.html](http://www.cancerscreening.nhs.uk/prostate/pcrmp-guide-1.html) [<http://www.cancerscreening.nhs.uk/prostate/pcrmp-guide-1.html>]

- 
- 2692 43. Epstein JI, Allsbrook WC, Jr., Amin MB, Egevad LL, Committee IG: **The**  
2693 **2005 International Society of Urological Pathology (ISUP) Consensus**  
2694 **Conference on Gleason Grading of Prostatic Carcinoma.** *The American*  
2695 *journal of surgical pathology* 2005, **29**(9):1228-1242.
- 2696 44. Cullen J, Rosner IL, Brand TC, Zhang N, Tsiatis AC, Moncur J, Ali A, Chen  
2697 Y, Knezevic D, Maddala T *et al*: **A Biopsy-based 17-gene Genomic**  
2698 **Prostate Score Predicts Recurrence After Radical Prostatectomy and**  
2699 **Adverse Surgical Pathology in a Racially Diverse Population of Men**  
2700 **with Clinically Low- and Intermediate-risk Prostate Cancer.** *European*  
2701 *urology* 2015, **68**(1):123-131.
- 2702 45. Bryant RJ, Sjoberg DD, Vickers AJ, Robinson MC, Kumar R, Marsden L,  
2703 Davis M, Scardino PT, Donovan J, Neal DE *et al*: **Predicting High-Grade**  
2704 **Cancer at Ten-Core Prostate Biopsy Using Four Kallikrein Markers**  
2705 **Measured in Blood in the ProtecT Study.** *Journal of the National*  
2706 *Cancer Institute* 2015, **107**(7).
- 2707 46. Nam RK, Cheung P, Herschorn S, Saskin R, Su J, Klotz LH, Chang M,  
2708 Kulkarni GS, Lee Y, Kodama RT *et al*: **Incidence of complications other**  
2709 **than urinary incontinence or erectile dysfunction after radical**  
2710 **prostatectomy or radiotherapy for prostate cancer: a population-**  
2711 **based cohort study.** *The Lancet Oncology* 2014, **15**(2):223-231.
- 2712 47. Pocock SJ, Simon R: **Sequential treatment assignment with balancing**  
2713 **for prognostic factors in the controlled clinical trial.** *Biometrics* 1975,  
2714 **31**(1):103-115.
- 2715 48. Moore CM, Kasivisvanathan V, Eggener S, Emberton M, Futterer JJ, Gill  
2716 IS, Grubb lii RL, Hadaschik B, Klotz L, Margolis DJ *et al*: **Standards of**  
2717 **Reporting for MRI-targeted Biopsy Studies (START) of the Prostate:**  
2718 **Recommendations from an International Working Group.** *Eur Urol*  
2719 2013, **64**(4):544-552.
- 2720 49. Presti JC, Jr.: **Prostate biopsy: how many cores are enough?** *Urologic*  
2721 *oncology* 2003, **21**(2):135-140.  
2722  
2723

2724 **Appendices**

2725 **Appendix 1: Time windows for data collection**

2726

2727 For the overall schedule of visits for each arm please see Section 9.3, Tables 1-3

2728 For details on time windows permitted for each trial intervention to be completed  
2729 please see Table 5 below.

2730

2731 Table 5: Details of time windows permitted for all trial interventions.

2732

| Contact and Purpose if not clear                                                                                                         | Time window permitted                                                                                                                                                                                                                                                                                                                                                                                                                                                                                              |
|------------------------------------------------------------------------------------------------------------------------------------------|--------------------------------------------------------------------------------------------------------------------------------------------------------------------------------------------------------------------------------------------------------------------------------------------------------------------------------------------------------------------------------------------------------------------------------------------------------------------------------------------------------------------|
| <p><b>Visit 0</b></p> <p>Telephone consult</p> <p>Purpose: give information on study. Send interested subjects the information sheet</p> | <p>Any time from referral letter being received to 1<sup>st</sup> visit in hospital.</p> <p>Ideally perform as soon as possible following receipt of referral.</p> <p>It may be the case that not all men have an opportunity to get a teleconsult prior to Visit 1. If this is the case then these men may still be included in the study.</p>                                                                                                                                                                    |
| <p><b>Visit 1</b></p> <p>Screening (eligibility review)</p>                                                                              | <p>Any time following referral of subject.</p> <p>Ideally perform as soon as possible following receipt of referral.</p>                                                                                                                                                                                                                                                                                                                                                                                           |
| <p><b>Visit 1</b></p> <p>Consent</p> <p>Randomization</p> <p>EQ-5D-5L Questionnaire (baseline)</p> <p>Optional urine, semen and</p>      | <p>Complete only once subject has had 24 hours after receiving the patient information leaflet to fully consider the study.</p> <p>Ideally on same visit as screening.</p> <p>Immediately after consent form signed.</p> <p>Complete immediately after consent form is signed</p> <p>If a subject is randomized to the MRI arm, a second EQ-5D-5L questionnaire should be given to the subject who is instructed to complete this 24-48 hours after the MRI.</p> <p>Complete after additional informed consent</p> |

|                                                     |                                                                                                                                                                                                                                                                                                                                                                                                                                                                                                                                                                                                                    |
|-----------------------------------------------------|--------------------------------------------------------------------------------------------------------------------------------------------------------------------------------------------------------------------------------------------------------------------------------------------------------------------------------------------------------------------------------------------------------------------------------------------------------------------------------------------------------------------------------------------------------------------------------------------------------------------|
| blood sample                                        | signed, after randomization and up until any point prior to a biopsy.                                                                                                                                                                                                                                                                                                                                                                                                                                                                                                                                              |
| <b>Visit 2</b>                                      |                                                                                                                                                                                                                                                                                                                                                                                                                                                                                                                                                                                                                    |
| MRI                                                 | Only for men randomized to this arm.<br><br>Any time following randomization. Ideally within 1 week of randomization.                                                                                                                                                                                                                                                                                                                                                                                                                                                                                              |
| EQ-5D-5L Questionnaire (post MRI)                   | To be completed 24-48 hours post-MRI as previously explained                                                                                                                                                                                                                                                                                                                                                                                                                                                                                                                                                       |
| Immediate post MRI/TRUS Fusion Biopsy Questionnaire | To be completed within 24 hours of MRI, ideally immediately after MRI prior to leaving department.                                                                                                                                                                                                                                                                                                                                                                                                                                                                                                                 |
| <b>Visit 3</b>                                      |                                                                                                                                                                                                                                                                                                                                                                                                                                                                                                                                                                                                                    |
| MRI-Targeted Biopsy of Prostate                     | Only for men randomized to this arm who have a lesion on MRI that needs a biopsy.<br><br>Any time following the MRI being reported, ideally within 1 week of MRI.<br><br>Depending on local Urology service structure, an appointment for a biopsy may need to be booked at the same time as the MRI is booked (i.e. immediately after randomization) in order for a slot to be secured for a biopsy to occur in timely fashion.<br><br>If it is determined from the MRI that a biopsy is not required then the biopsy appointment can be used instead of Visit 4 for follow up of results and treatment decision. |
| Visit 3                                             |                                                                                                                                                                                                                                                                                                                                                                                                                                                                                                                                                                                                                    |
| Systematic TRUS guided biopsy                       | Only for men randomized to this arm.<br><br>Any time following randomization. Ideally within 4 weeks of randomization.                                                                                                                                                                                                                                                                                                                                                                                                                                                                                             |
| <b>Visit 3</b>                                      |                                                                                                                                                                                                                                                                                                                                                                                                                                                                                                                                                                                                                    |
| Immediate post-biopsy questionnaire                 | Should be completed and returned immediately after a biopsy, before the subject leaves the department. As long as questionnaire completed within 24 hours it will be acceptable.                                                                                                                                                                                                                                                                                                                                                                                                                                   |
| 30-day post-biopsy questionnaire                    | To be given to subject to take home after biopsy and completed as instructed on day 30 post-                                                                                                                                                                                                                                                                                                                                                                                                                                                                                                                       |

|                                                                               |                                                                                                                                                                                                                                                                                                                                                                                                                                                                                                                                                                                                                                                                             |
|-------------------------------------------------------------------------------|-----------------------------------------------------------------------------------------------------------------------------------------------------------------------------------------------------------------------------------------------------------------------------------------------------------------------------------------------------------------------------------------------------------------------------------------------------------------------------------------------------------------------------------------------------------------------------------------------------------------------------------------------------------------------------|
| <p>Telephone reminder</p>                                                     | <p>biopsy.</p> <p>To be returned by post or at follow up appointment (Visit 4).</p> <p>If Visit 4 is earlier than 30 days post biopsy then this questionnaire can be given to the research team when 30 days is finally complete.</p> <p>If Visit 4 is on or later than 30 days then this can be returned at the Visit 4 appointment.</p> <p>As long as questionnaire is completed at 30-60 days post-biopsy, it will be acceptable. Ideally the questionnaire should be completed as close as possible to 30 days post-biopsy.</p> <p>At 30-days post biopsy a member of the research team will phone the subject to remind them to fill out the 30-day questionnaires</p> |
| <p><b>Visit 3</b></p> <p>EQ-5D-5L Questionnaire (post-biopsy)</p>             | <p>Should be given to subject to take home after biopsy. To be completed 24-48 hours post-biopsy.</p> <p>Telephone call to remind to complete.</p>                                                                                                                                                                                                                                                                                                                                                                                                                                                                                                                          |
| <p><b>Visit 3</b></p> <p>Post-MRI/TRUS Fusion Biopsy 30-day questionnaire</p> | <p>Only for subjects in the MRI arm who do not undergo biopsy.</p> <p>In this case, the questionnaire will be posted to them by the research team or given to them when they obtain their results of the MRI.</p> <p>To be returned at follow up appointment (Visit 4) or by post.</p> <p>If Visit 4 is earlier than 30 days post MRI then this questionnaire can be given to the research team when 30-days is finally complete.</p> <p>If Visit 4 is on or later than 30 days then this can be returned at the Visit 4 appointment.</p> <p>As long as questionnaire is completed at 30-60</p>                                                                             |

|                                                                               |                                                                                                                                                                                                                                                                                                                                                                                                                                                                       |
|-------------------------------------------------------------------------------|-----------------------------------------------------------------------------------------------------------------------------------------------------------------------------------------------------------------------------------------------------------------------------------------------------------------------------------------------------------------------------------------------------------------------------------------------------------------------|
| Telephone Reminder                                                            | <p>days post-MRI, it will be acceptable. Ideally the questionnaire should be completed as close as possible to 30 days post-MRI.</p> <p>At 30-days post MRI, a member of the research team will ring the subject t to remind them to fill out the 30-day questionnaires</p>                                                                                                                                                                                           |
| <p><b>Visit 4</b></p> <p>Follow up for results<br/>And treatment Decision</p> | <p>Should be completed as soon as possible following the availability of any pathology results. Alternatively, if a man is in the MRI arm and the MRI is negative, this follow up should occur after the availability of the MRI report. Ideally the follow up appointment should be within 6 weeks of randomization.</p> <p>Depending on local Urology service structure, these results may need to be discussed at an MDT meeting to inform treatment decision.</p> |
| <p><b>Visit 4</b></p> <p>30-day post intervention EQ-5D-5L Questionnaire</p>  | <p>To be completed at 30 days post-biopsy or 30-days post MRI if no biopsy occurs.</p> <p>The questionnaire needs to be ideally completed on the 30<sup>th</sup> day post-intervention (i.e. post biopsy or post MRI if no biopsy). However it will be accepted if completed up to 72 hours prior to or after the 30<sup>th</sup> day.</p> <p>A telephone reminder from the research team to the subject can take place.</p>                                          |
| <p><b>Visit 5</b></p> <p>52 week follow up visit</p>                          | <p>The following information will be obtained on an annual basis:</p> <ul style="list-style-type: none"> <li>• time to cancer diagnosis;</li> <li>• Gleason score progression;</li> <li>• time to intervention on active surveillance;</li> <li>• time on active surveillance;</li> <li>• results of PSA tests.</li> <li>• results of any off protocol biopsies or MRI</li> </ul>                                                                                     |

|                                                       |                                                                                                                                                                                                                                                                                                                                                                                                                                                                                                                                                                                                                                                                                                    |
|-------------------------------------------------------|----------------------------------------------------------------------------------------------------------------------------------------------------------------------------------------------------------------------------------------------------------------------------------------------------------------------------------------------------------------------------------------------------------------------------------------------------------------------------------------------------------------------------------------------------------------------------------------------------------------------------------------------------------------------------------------------------|
| <p><b>Visit 6</b></p> <p>104 week follow up visit</p> | <p>The following information will be obtained on an annual basis:</p> <ul style="list-style-type: none"> <li>• time to cancer diagnosis;</li> <li>• Gleason score progression;</li> <li>• time to intervention on active surveillance;</li> <li>• time on active surveillance;</li> <li>• results of PSA tests.</li> </ul> <p>Those subjects randomized to ARM A but who did not have an MPMRI-targeted biopsy will have an additional MPMRI at Visit 6. This will be followed by a targeted-biopsy if results of MRI are positive (PI-RADS 3-5).</p> <p>Follow-up will cease once treatment beyond active surveillance is undertaken (prostatectomy, radiation therapy, focal therapy, etc.).</p> |
|-------------------------------------------------------|----------------------------------------------------------------------------------------------------------------------------------------------------------------------------------------------------------------------------------------------------------------------------------------------------------------------------------------------------------------------------------------------------------------------------------------------------------------------------------------------------------------------------------------------------------------------------------------------------------------------------------------------------------------------------------------------------|

2733

2734



## Appendix 2: MPMRI Reporting Proforma

2735  
2736  
2737  
2738  
2739  
2740  
2741  
2742  
2743  
2744  
2745  
2746  
2747  
2748  
2749  
2750  
2751  
2752  
2753  
2754  
2755  
2756  
2757  
2758  
2759  
2760  
2761  
2762  
2763  
2764  
2765  
2766  
2767  
2768  
2769  
2770  
2771  
2772  
2773  
2774  
2775  
2776  
2777  
2778  
2779  
2780  
2781  
2782  
2783  
2784  
2785

Reporting radiologist                      Date of scan                      Date of report

Radiologists should annotate this diagram with up to 3 suspicious areas scoring 3 or greater on the PI-RADS v2 scale of suspicion.

The three most suspicious areas should be annotated, each with the score clearly marked.

“Target 1” should be the area with the greatest degree of suspicion. If applicable, “Target 2” should be the area with the next greatest degree of suspicion and finally if applicable, “Target 3” should be the area with the next greatest degree of suspicion. For each suspicious area biaxial measurements should be recorded using the pulse sequences that shows the tumor the best with all 3 measurements in orthogonal planes provided whenever possible and a minimum of two axial plane measurements provide for every lesion.

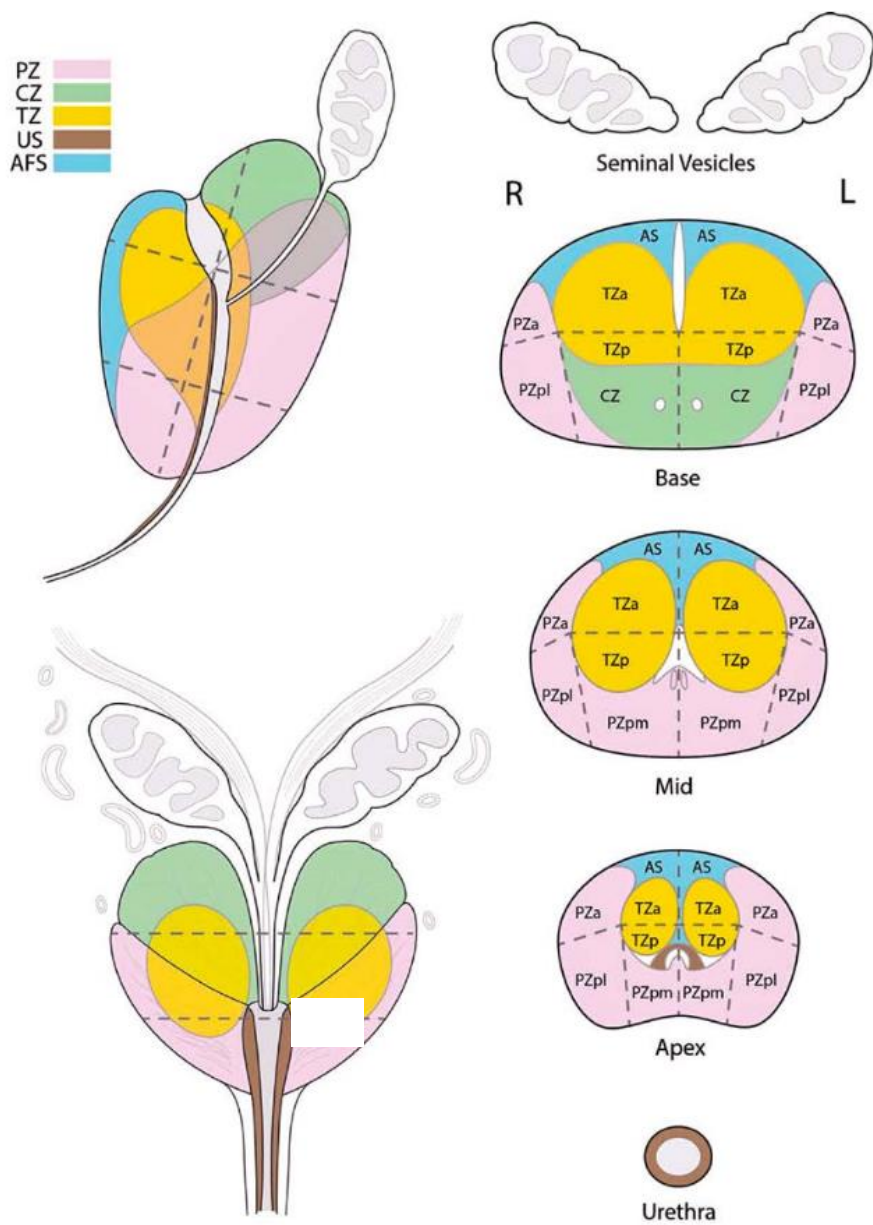

2786 Image quality: Good, Minor image quality issues, acceptable for diagnosis, unacceptable  
 2787  
 2788 If image quality is not good please comment: \_\_\_\_\_  
 2789  
 2790  
 2791  
 2792

2793  
 2794 **Findings (intermediate (PI-Rads 3), high (PI-Rads 4) or very high (PI-Rads 5))**  
 2795

2796  
 2797 Number of candidate tumor sites (in order of dominance): 1  
 2798

2799 Target 1:  
 2800 Pi-Rads Score:  
 2801 Size: x x mm  
 2802 Location(s): ( side)  
 2803

2804 Target 2:  
 2805 Pi-Rads Score:  
 2806 Size: x x mm  
 2807 Location(s): ( side)  
 2808

2809 Target 3:  
 2810 Pi-Rads Score:  
 2811 Size: x x mm  
 2812 Location(s): ( side)  
 2813  
 2814

2815 There are more than 3 targets seen: Y/N  
 2816  
 2817 There is a multifocal pattern raising a concern for multifocal small volume cancer  
 2818 and a PSA Density >0.15 without a measurable focal lesion (3M pattern): Y/N  
 2819

2820 Extraprostatic extension: Y/N/Equivocal  
 2821 Seminal vesicle invasion: Left: Y/N/equivocal Right: y/n/equivocal  
 2822 Adenopathy: no  
 2823

|      |   |       |   |                     |    |                |  |          |
|------|---|-------|---|---------------------|----|----------------|--|----------|
|      | x |       | x |                     | cm | <b>Volume:</b> |  | cc       |
| PSA: |   | ng/ml |   | <b>PSA Density:</b> |    |                |  | ng/ml/cc |

2824  
 2825

2826

### Appendix 3: Example of systematic TRUS guided biopsy schema

2827

2828 Figure depicting 12-core systematic TRUS guided biopsy schema that sites are  
2829 recommended to follow. Axial/coronal sections of a prostate gland (left) showing  
2830 biopsy courses of the 12 biopsies performed under ultrasound guidance with an  
2831 endfire probe. Upper right: axial planes in the sagittal view. a, base; b, mid-gland; c,  
2832 apex. From Haffner *et al* [37].

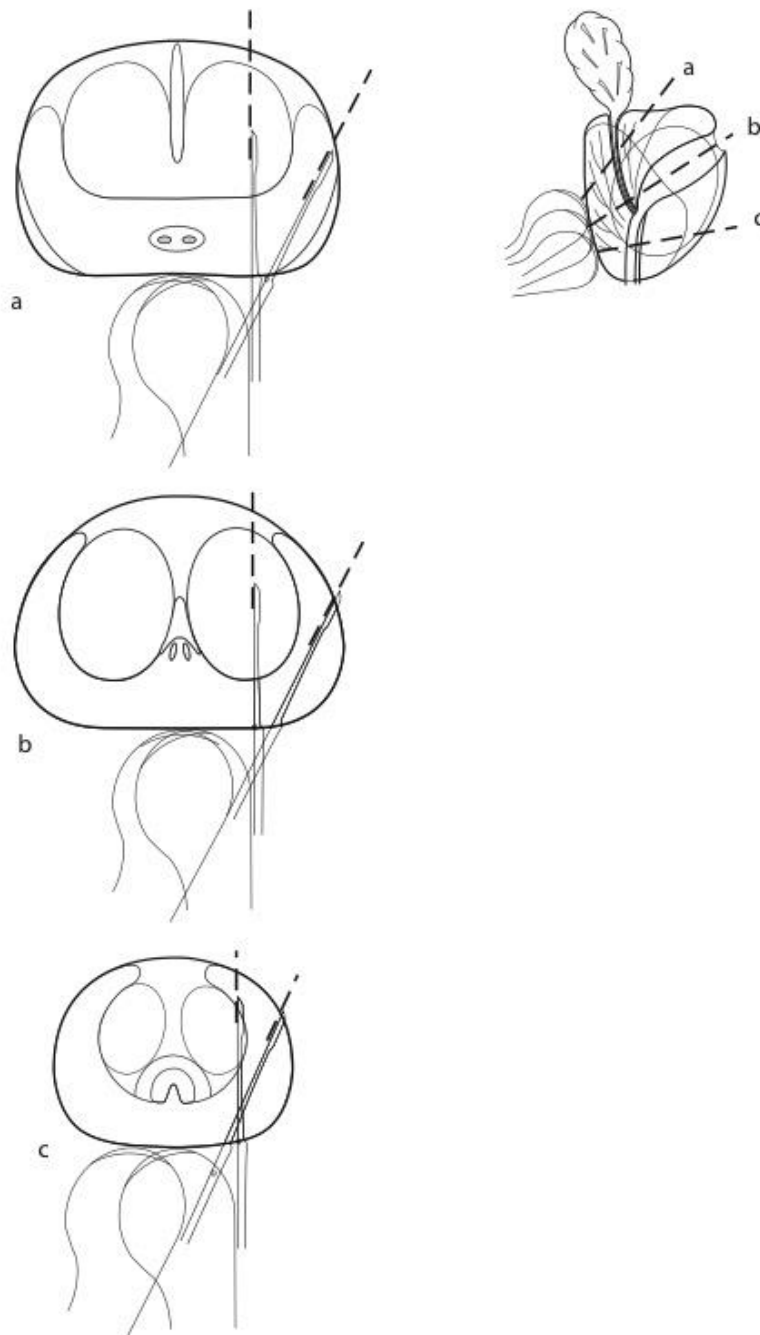

2833

---

2834 **Appendix 4: 2-page EQ-5D-5L Questionnaire**

2835 Under each heading, please tick the ONE box that best describes your health TODAY

2836

2837 **MOBILITY**

2838 I have no problems in walking about

2839 I have slight problems in walking about

2840 I have moderate problems in walking about

2841 I have severe problems in walking about

2842 I am unable to walk about

2843

2844 **SELF-CARE**

2845 I have no problems washing or dressing myself

2846 I have slight problems washing or dressing myself

2847 I have moderate problems washing or dressing myself

2848 I have severe problems washing or dressing myself

2849 I am unable to wash or dress myself

2850

2851 **USUAL ACTIVITIES** (*e.g. work, study, housework,*

2852 *family or leisure activities*)

2853 I have no problems doing my usual activities

2854 I have slight problems doing my usual activities

2855 I have moderate problems doing my usual activities

2856 I have severe problems doing my usual activities

2857 I am unable to do my usual activities

2858

2859 **PAIN / DISCOMFORT**

2860 I have no pain or discomfort

2861 I have slight pain or discomfort

2862 I have moderate pain or discomfort

2863 I have severe pain or discomfort

2864 I have extreme pain or discomfort

2865

2866 **ANXIETY / DEPRESSION**

2867 I am not anxious or depressed

2868 I am slightly anxious or depressed

2869 I am moderately anxious or depressed

2870 I am severely anxious or depressed

2871 I am extremely anxious or depressed

2872

2873 © 1990 EuroQol Group. EQ-5D™ is a trade mark of the EuroQol Group

2874 • We would like to know how good or bad your health  
2875 is TODAY.

The best health  
you can imagine

2876 • This scale is numbered from 0 to 100.

2877 • 100 means the best health you can imagine.

2878 0 means the worst health you can imagine.

2879 • Mark an X on the scale to indicate how your health is  
2880 TODAY.

2881 • Now, please write the number you marked on the  
2882 scale in the box below.

2883

2884

2885

2886

2887

2888

YOUR HEALTH TODAY =

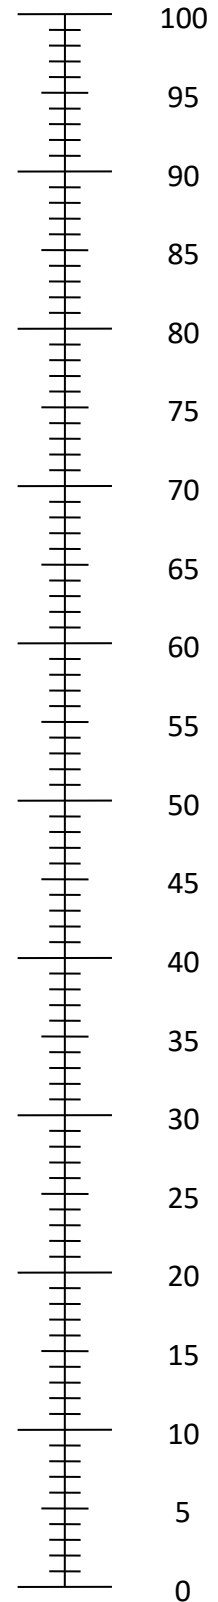

The worst health  
you can imagine



---

Did you experience any of the following in the month **before** your MRI. For each question, tick the box that applies:

3. Fevers

Yes  
  
1

No  
  
2

4. Blood in the urine

Yes  
  
1

No  
  
2

5. Blood in the semen

Yes  
  
1

No  
  
2

6. Blood in the stools or from the back passage

Yes  
  
1

No  
  
2

7. Acute urinary retention, meaning the painful inability to pass urine which was relieved by passing a catheter into the bladder through the penis

Yes  
  
1

No  
  
2

8. Erectile dysfunction, meaning the persistent inability to get and maintain an erection sufficient to allow satisfactory sexual performance

Yes  
  
1

No  
  
2

9. Urinary incontinence, meaning any undesired leakage of urine

Yes  
  
1

No  
  
2

10. Urinary tract infection diagnosed by a healthcare professional

Yes  
  
1

No  
  
2

**Thank you for completing the questionnaire. Please give this to a member of the research team on your next hospital visit.**

2893  
2894  
2895  
2896  
2897  
2898  
2899

## Appendix 6: 30-day Post MRI/TRUS Fusion Biopsy Questionnaire

### 30-day post MRI questionnaire

30-days after the MRI, the patient should complete this 5-page questionnaire:

Did you experience the following problem in the 30-days after the MRI:

1. Fevers

Yes  No

1                      2

2. If you answered yes, specify on which days after the MRI you had this? (*tick as many boxes as are applicable*)

Days:    0-2                      3-5                      6-10                      11-15                      16-20                      21-30

|   |   |   |   |   |   |
|---|---|---|---|---|---|
|   |   |   |   |   |   |
| 1 | 2 | 3 | 4 | 5 | 6 |

3. If you answered yes, how much of a problem was this for you? (*tick one box*)

Not a problem at all                      Minor Problem                      Moderate Problem                      Major Problem

                                                                

1                      2                      3                      4

Did you experience the following problem in the 30-days after the MRI:

4. Blood in the urine

Yes  No

1                      2

5. If you answered yes, specify on which days after the MRI you had this? (*tick as many boxes as are applicable*)

Days:    0-2                      3-5                      6-10                      11-15                      16-20                      21-30

|   |   |   |   |   |   |
|---|---|---|---|---|---|
|   |   |   |   |   |   |
| 1 | 2 | 3 | 4 | 5 | 6 |

6. If you answered yes, how much of a problem was this for you? (*tick one box*)

Not a problem at all                      Minor Problem                      Moderate Problem                      Major Problem

                                                                

1                      2                      3                      4

Did you experience the following problem in the 30-days after the MRI:

7. Blood in the semen

Yes  No

1                      2

8. If you answered yes, specify on which days after the MRI you had this? (*tick as many boxes as are applicable*)

Days:    0-2                      3-5                      6-10                      11-15                      16-20                      21-30

|   |   |   |   |   |   |
|---|---|---|---|---|---|
|   |   |   |   |   |   |
| 1 | 2 | 3 | 4 | 5 | 6 |

9. If you answered yes, how much of a problem was this for you? (*tick one box*)

Not a problem at all                      Minor Problem                      Moderate Problem                      Major Problem

                                                                

1                      2                      3                      4



Did you experience the following problem in the 30-days after the MRI:

10. Blood in the stools or from the back passage

Yes  No   
1 2

11. If you answered yes, specify on which days after the MRI you had this? (*tick as many boxes as are applicable*)

Days: 0-2 3-5 6-10 11-15 16-20 21-30

|                          |                          |                          |                          |                          |                          |
|--------------------------|--------------------------|--------------------------|--------------------------|--------------------------|--------------------------|
| <input type="checkbox"/> |
| 1                        | 2                        | 3                        | 4                        | 5                        | 6                        |

12. If you answered yes, how much of a problem was this for you? (*tick one box*)

Not a problem at all  Minor Problem  Moderate Problem  Major Problem   
1 2 3 4

Did you experience the following problem in the 30-days after the MRI:

13. Acute urinary retention, meaning the painful inability to pass urine which was relieved by passing a catheter into the bladder through the penis

Yes  No   
1 2

14. If you answered yes, how long after the MRI did this occur? (*tick one*)

Days: 0-2 3-5 6-10 11-15 16-20 21-30

|                          |                          |                          |                          |                          |                          |
|--------------------------|--------------------------|--------------------------|--------------------------|--------------------------|--------------------------|
| <input type="checkbox"/> |
| 1                        | 2                        | 3                        | 4                        | 5                        | 6                        |

15. If you answered yes, how much of a problem was this for you? (*tick one box*)

Not a problem at all  Minor Problem  Moderate Problem  Major Problem   
1 2 3 4

Did you experience the following problem in the 30-days after the MRI:

16. Erectile dysfunction, meaning the persistent inability to get and maintain an erection sufficient to allow satisfactory sexual performance

Yes  No   
1 2

17. If you answered yes, specify on which days after the MRI you had this? (*tick as many boxes as are applicable*)

Days: 0-2 3-5 6-10 11-15 16-20 21-30

|                          |                          |                          |                          |                          |                          |
|--------------------------|--------------------------|--------------------------|--------------------------|--------------------------|--------------------------|
| <input type="checkbox"/> |
| 1                        | 2                        | 3                        | 4                        | 5                        | 6                        |

18. If you answered yes, how much of a problem was this for you? (*tick one box*)

Not a problem at all  Minor Problem  Moderate Problem  Major Problem   
1 2 3 4

2902

Did you experience the following problem in the 30-days after the MRI:

19. Urinary incontinence, meaning any undesired leakage of urine

Yes  No   
1 2

20. If you answered yes, specify on which days after the MRI you had this? (*tick as many boxes as are applicable*)

Days: 0-2 3-5 6-10 11-15 16-20 21-30

|                          |                          |                          |                          |                          |                          |
|--------------------------|--------------------------|--------------------------|--------------------------|--------------------------|--------------------------|
| <input type="checkbox"/> |
| 1                        | 2                        | 3                        | 4                        | 5                        | 6                        |

21. If you answered yes, how much of a problem was this for you? (*tick one box*)

Not a problem at all  Minor Problem  Moderate Problem  Major Problem   
1 2 3 4

Did you experience the following problem in the 30-days after the MRI:

22. Urinary tract infection diagnosed by a healthcare professional

Yes  No   
1 2

23. If you answered yes, how long after the MRI did this occur after? (*tick one*)

Days: 0-2 3-5 6-10 11-15 16-20 21-30

|                          |                          |                          |                          |                          |                          |
|--------------------------|--------------------------|--------------------------|--------------------------|--------------------------|--------------------------|
| <input type="checkbox"/> |
| 1                        | 2                        | 3                        | 4                        | 5                        | 6                        |

24. If you answered yes, how much of a problem was this for you? (*tick one box*)

Not a problem at all  Minor Problem  Moderate Problem  Major Problem   
1 2 3 4

Did you experience the following problem in the 30-days after the MRI:

25. Pain as a result of the MRI

Yes  No   
1 2

26. If you answered yes, specify on which days after the MRI you had this? (*tick as many boxes as are applicable*)

Days: 0-2 3-5 6-10 11-15 16-20 21-30

|                          |                          |                          |                          |                          |                          |
|--------------------------|--------------------------|--------------------------|--------------------------|--------------------------|--------------------------|
| <input type="checkbox"/> |
| 1                        | 2                        | 3                        | 4                        | 5                        | 6                        |

27. If you answered yes, how much of a problem was this for you? (*tick one box*)

Not a problem at all  Minor Problem  Moderate Problem  Major Problem   
1 2 3 4

2903

28. Please list any **new** medications that you have taken **since the MRI**. Do not list your regular medications but do list any **new** medications started related to the MRI. Think especially about any painkillers that you may have taken. Only list the medications if you have taken them. An example is given in the first box:

| Name of medication      | Dosage    | Number of doses per day | Number of days |
|-------------------------|-----------|-------------------------|----------------|
| <i>e.g. paracetamol</i> | <i>1g</i> | <i>4</i>                | <i>3</i>       |
|                         |           |                         |                |
|                         |           |                         |                |
|                         |           |                         |                |
|                         |           |                         |                |
|                         |           |                         |                |
|                         |           |                         |                |
|                         |           |                         |                |

29. Since the MRI, have you had contacts with hospital services for reasons related to the MRI, which were unplanned and not part of the routine study visits?

*Please answer yes if you have had any unplanned contact with any healthcare staff e.g. doctor, nurse, other. Please also answer yes if you have had any unplanned consultations with healthcare staff over the phone*

Yes  
  
 1

No  
  
 2

30. If yes, please answer describe:

(i) who the contact was with (*e.g. nurse/doctor/other*)

(ii) reason for contact (*e.g. concern over pain*)

(iii) manner of contact (*e.g. telephone/attendance at outpatient clinic/attendance in accident and emergency*)

(iv) any treatment you received (please be as specific as possible *e.g. "I was seen in accident and emergency and discharged with 2 days of painkillers of oral paracetamol 1g four times a day"*):

2904

31. How many times, if any, have you attended the accident and emergency department?

32. How many nights, if any, have you been admitted to hospital as an inpatient?

33. How many days, if any, have you been admitted to a day ward in hospital without staying the night?

34. How many days, if any, have you been admitted to an intensive care unit for?

35. Since the MRI, have you had contact with the community healthcare team for reasons related to the MRI?

*Please answer yes if you have had any contact with any healthcare staff in the community e.g. GP, practice nurse, community nurse, other. Please also answer yes if you have had any consultations with community healthcare staff over the phone*

Yes  
  
1

No  
  
2

36. If yes, please answer describe:

(i) who the contact was with (*e.g. nurse/doctor/other*)

(ii) reason for contact (*e.g. concern over pain*)

(iii) manner of contact (*e.g. telephone/attendance at GP surgery/home visit*)

(iv) any treatment you received (please be as specific as possible *e.g. "I received 5 days of painkillers with paracetamol 1g four times a day"*):

2905

37. Have you felt unwell in any other way that we have not asked that you feel is due to the MRI?

Yes  
  
1

No  
  
2

38. If you answered yes, please describe:

39. If you answered yes, how long after the MRI did you have this for? (*tick one*)

| Days: | 0-2                      | 3-5                      | 6-10                     | 11-15                    | 16-20                    | 21-30                    |
|-------|--------------------------|--------------------------|--------------------------|--------------------------|--------------------------|--------------------------|
|       | <input type="checkbox"/> |
|       | 1                        | 2                        | 3                        | 4                        | 5                        | 6                        |

40. If you answered yes, how much of a problem was this for you? (*tick one box*)

Not a problem

at all  
  
1

Minor Problem

2

Moderate Problem

3

Major Problem

4

41. If **another MRI** in the future was medically necessary, how much of a problem would it be for you to undergo the same procedure? (*tick one box*)

Not a problem

at all  
  
1

Minor Problem

2

Moderate Problem

3

Major Problem

4

?

?

**Thank you for completing the questionnaire. Please post the questionnaire in the pre-paid self-addressed envelope or give to the research team at your next visit. Please contact us if you have any queries.**

2906

## Appendix 7: Immediate post biopsy questionnaire

### Immediate post-biopsy questionnaire

Please ask the patient to fill this out after the biopsy, before they leave the department.

Please tick the box corresponding to the number, which describes how you felt immediately after the biopsy procedure:

1. Overall, how much discomfort did the biopsy procedure cause you?

|                          |                          |                          |                          |                          |                          |                          |                          |                           |                          |                          |
|--------------------------|--------------------------|--------------------------|--------------------------|--------------------------|--------------------------|--------------------------|--------------------------|---------------------------|--------------------------|--------------------------|
| 0                        | 1                        | 2                        | 3                        | 4                        | 5                        | 6                        | 7                        | 8                         | 9                        | 10                       |
| <input type="checkbox"/>  | <input type="checkbox"/> | <input type="checkbox"/> |
| No Discomfort            |                          |                          | Moderate Discomfort      |                          |                          |                          |                          | Worst Discomfort Possible |                          |                          |

2. Overall, how much pain did the biopsy procedure cause you?

|                          |                          |                          |                          |                          |                          |                          |                          |                          |                          |                          |
|--------------------------|--------------------------|--------------------------|--------------------------|--------------------------|--------------------------|--------------------------|--------------------------|--------------------------|--------------------------|--------------------------|
| 0                        | 1                        | 2                        | 3                        | 4                        | 5                        | 6                        | 7                        | 8                        | 9                        | 10                       |
| <input type="checkbox"/> |
| No Pain                  |                          |                          | Moderate Pain            |                          |                          |                          |                          | Worst pain Possible      |                          |                          |

- 
- 
- 
- 
- 
- 
- 
- 
- 
- 
- 
- 
- 
- 
- 
- 
- 
- 
- 
- 

Please complete the next page of questions

---

Did you experience any of the following in the month **before** your biopsy procedure.  
For each question, tick the box that applies:

3. Fevers

Yes  
  
1

No  
  
2

4. Blood in the urine

Yes  
  
1

No  
  
2

5. Blood in the semen

Yes  
  
1

No  
  
2

6. Blood in the stools or from the back passage

Yes  
  
1

No  
  
2

7. Acute urinary retention, meaning the painful inability to pass urine which was relieved by passing a catheter into the bladder through the penis

Yes  
  
1

No  
  
2

8. Erectile dysfunction, meaning the persistent inability to get and maintain an erection sufficient to allow satisfactory sexual performance

Yes  
  
1

No  
  
2

9. Urinary incontinence, meaning any undesired leakage of urine

Yes  
  
1

No  
  
2

10. Urinary tract infection diagnosed by a healthcare professional

Yes  
  
1

No  
  
2

11. Pain at the site where the biopsies were taken from

Yes  
  
1

No  
  
2

**Thank you for completing the questionnaire. Please hand this to a member of staff before you leave. Please ensure you are given the 30-day questionnaire for completion at 30 days following the biopsy.**

2910

**Appendix 8: 30-day post biopsy questionnaire**

**30-day post biopsy questionnaire**

30-days after the biopsy procedure, the patient should complete this questionnaire:

Did you experience the following problem in the 30-days after the biopsy procedure:

1. Fevers

Yes  No

1 2

2. If you answered yes, specify on which days after the biopsy you had this? (*tick as many boxes as are applicable*)

Days: 0-2 3-5 6-10 11-15 16-20 21-30

|   |   |   |   |   |   |
|---|---|---|---|---|---|
|   |   |   |   |   |   |
| 1 | 2 | 3 | 4 | 5 | 6 |

3. If you answered yes, how much of a problem was this for you? (*tick one box*)

Not a problem at all Minor Problem Moderate Problem Major Problem

1 2 3 4

Did you experience the following problem in the 30-days after the biopsy procedure:

4. Blood in the urine

Yes  No

1 2

5. If you answered yes, specify on which days after the biopsy you had this? (*tick as many boxes as are applicable*)

Days: 0-2 3-5 6-10 11-15 16-20 21-30

|   |   |   |   |   |   |
|---|---|---|---|---|---|
|   |   |   |   |   |   |
| 1 | 2 | 3 | 4 | 5 | 6 |

6. If you answered yes, how much of a problem was this for you? (*tick one box*)

Not a problem at all Minor Problem Moderate Problem Major Problem

1 2 3 4

Did you experience the following problem in the 30-days after the biopsy procedure:

7. Blood in the semen

Yes  No

1 2

8. If you answered yes, specify on which days after the biopsy you had this? (*tick as many boxes as are applicable*)

Days: 0-2 3-5 6-10 11-15 16-20 21-30

|   |   |   |   |   |   |
|---|---|---|---|---|---|
|   |   |   |   |   |   |
| 1 | 2 | 3 | 4 | 5 | 6 |

9. If you answered yes, how much of a problem was this for you? (*tick one box*)

Not a problem at all Minor Problem Moderate Problem Major Problem

1 2 3 4



Did you experience the following problem in the 30-days after the biopsy procedure:

10. Blood in the stools or from the back passage

Yes  No   
1 2

11. If you answered yes, how long after the biopsy did you have this for? (*tick one*)

Days: 0-2 3-5 6-10 11-15 16-20 21-30

|                          |                          |                          |                          |                          |                          |
|--------------------------|--------------------------|--------------------------|--------------------------|--------------------------|--------------------------|
| <input type="checkbox"/> |
| 1                        | 2                        | 3                        | 4                        | 5                        | 6                        |

12. If you answered yes, how much of a problem was this for you? (*tick one box*)

Not a problem at all Minor Problem Moderate Problem Major Problem

|                          |                          |                          |                          |
|--------------------------|--------------------------|--------------------------|--------------------------|
| <input type="checkbox"/> | <input type="checkbox"/> | <input type="checkbox"/> | <input type="checkbox"/> |
| 1                        | 2                        | 3                        | 4                        |

Did you experience the following problem in the 30-days after the biopsy procedure:

13. Acute urinary retention, meaning the painful inability to pass urine which was relieved by passing a catheter into the bladder through the penis

Yes  No   
1 2

14. If you answered yes, how long after the biopsy did this occur? (*tick one*)

Days: 0-2 3-5 6-10 11-15 16-20 21-30

|                          |                          |                          |                          |                          |                          |
|--------------------------|--------------------------|--------------------------|--------------------------|--------------------------|--------------------------|
| <input type="checkbox"/> |
| 1                        | 2                        | 3                        | 4                        | 5                        | 6                        |

15. If you answered yes, how much of a problem was this for you? (*tick one box*)

Not a problem at all Minor Problem Moderate Problem Major Problem

|                          |                          |                          |                          |
|--------------------------|--------------------------|--------------------------|--------------------------|
| <input type="checkbox"/> | <input type="checkbox"/> | <input type="checkbox"/> | <input type="checkbox"/> |
| 1                        | 2                        | 3                        | 4                        |

Did you experience the following problem in the 30-days after the biopsy procedure:

16. Erectile dysfunction, meaning the persistent inability to get and maintain an erection sufficient to allow satisfactory sexual performance

Yes  No   
1 2

17. If you answered yes, how long after the biopsy did you have this for? (*tick one*)

Days: 0-2 3-5 6-10 11-15 16-20 21-30

|                          |                          |                          |                          |                          |                          |
|--------------------------|--------------------------|--------------------------|--------------------------|--------------------------|--------------------------|
| <input type="checkbox"/> |
| 1                        | 2                        | 3                        | 4                        | 5                        | 6                        |

18. If you answered yes, how much of a problem was this for you? (*tick one box*)

Not a problem at all Minor Problem Moderate Problem Major Problem

|                          |                          |                          |                          |
|--------------------------|--------------------------|--------------------------|--------------------------|
| <input type="checkbox"/> | <input type="checkbox"/> | <input type="checkbox"/> | <input type="checkbox"/> |
| 1                        | 2                        | 3                        | 4                        |

2913

Did you experience the following problem in the 30-days after the biopsy procedure:

19. Urinary incontinence, meaning any undesired leakage of urine

Yes  No   
1 2

20. If you answered yes, how long after the biopsy did you have this for? (*tick one*)

Days: 0-2 3-5 6-10 11-15 16-20 21-30

|                          |                          |                          |                          |                          |                          |
|--------------------------|--------------------------|--------------------------|--------------------------|--------------------------|--------------------------|
| <input type="checkbox"/> |
| 1                        | 2                        | 3                        | 4                        | 5                        | 6                        |

21. If you answered yes, how much of a problem was this for you? (*tick one box*)

Not a problem at all Minor Problem Moderate Problem Major Problem

1 2 3 4

Did you experience the following problem in the 30-days after the biopsy procedure:

22. Urinary tract infection diagnosed by a healthcare professional

Yes  No   
1 2

23. If you answered yes, how long after the biopsy did this occur after? (*tick one*)

Days: 0-2 3-5 6-10 11-15 16-20 21-30

|                          |                          |                          |                          |                          |                          |
|--------------------------|--------------------------|--------------------------|--------------------------|--------------------------|--------------------------|
| <input type="checkbox"/> |
| 1                        | 2                        | 3                        | 4                        | 5                        | 6                        |

24. If you answered yes, how much of a problem was this for you? (*tick one box*)

Not a problem at all Minor Problem Moderate Problem Major Problem

1 2 3 4

Did you experience the following problem in the 30-days after the biopsy procedure:

25. Pain at the site where the biopsies were taken from

Yes  No   
1 2

26. If you answered yes, how long after the biopsy did you have this for? (*tick one*)

Days: 0-2 3-5 6-10 11-15 16-20 21-30

|                          |                          |                          |                          |                          |                          |
|--------------------------|--------------------------|--------------------------|--------------------------|--------------------------|--------------------------|
| <input type="checkbox"/> |
| 1                        | 2                        | 3                        | 4                        | 5                        | 6                        |

27. If you answered yes, how much of a problem was this for you? (*tick one box*)

Not a problem at all Minor Problem Moderate Problem Major Problem

1 2 3 4

2914

28. Please list any **new** medications that you have taken **since the biopsy**. Do not list your regular medications but do list any **new** medications started related to the biopsy. Think especially about any painkillers or antibiotics that you may have taken. Only list the medications if you have taken them. An example is given in the first box:

| Name of medication        | Dosage       | Number of doses per day | Number of days |
|---------------------------|--------------|-------------------------|----------------|
| <i>e.g. ciprofloxacin</i> | <i>500mg</i> | <i>2</i>                | <i>3</i>       |
|                           |              |                         |                |
|                           |              |                         |                |
|                           |              |                         |                |
|                           |              |                         |                |
|                           |              |                         |                |
|                           |              |                         |                |
|                           |              |                         |                |

29. Since the biopsy, have you had contacts with hospital services for reasons related to the biopsy, which were unplanned and not part of the routine study visits?

*Please answer yes if you have had any unplanned contact with any healthcare staff e.g. doctor, nurse, other. Please also answer yes if you have had any unplanned consultations with healthcare staff over the phone*

Yes

No

1

2

30. If yes, please answer describe:

(i) who the contact was with (*e.g. nurse/doctor/other*)

(ii) reason for contact (*e.g. concern over fevers*)

(iii) manner of contact (*e.g. telephone/attendance at outpatient clinic/attendance in accident and emergency*)

(iv) any treatment you received (please be as specific as possible *e.g. "I was admitted to the ward and treated for an infection of the blood stream for 5 days of intravenous antibiotics with 1.2g co-amoxiclav three times a day and I had 2 days of painkillers with intravenous paracetamol 1g four times a day"*):

2915

31. How many times, if any, have you attended the accident and emergency department?

32. How many nights, if any, have you been admitted to hospital as an inpatient?

33. How many days, if any, have you been admitted to a day ward in hospital without staying the night?

34. How many days, if any, have you been admitted to an intensive care unit for?

35. Since the biopsy, have you had contact with the community healthcare team for reasons related to the biopsy?

*Please answer yes if you have had any contact with any healthcare staff in the community e.g. GP, practice nurse, community nurse, other. Please also answer yes if you have had any consultations with community healthcare staff over the phone*

Yes

1

No

2

36. If yes, please answer describe:

(i) who the contact was with (e.g. nurse/doctor/other)

(ii) reason for contact (e.g. concern over fevers)

(iii) manner of contact (e.g. telephone/attendance at GP surgery/home visit)

(iv) any treatment you received (please be as specific as possible e.g. "I received 5 days of oral antibiotics for a urinary tract infection- 625mg co-amoxiclav three times a day and I had 2 days of painkillers with paracetamol 1g four times a day"):

2916

2917

37. Have you felt unwell in any other way that we have not asked that you feel is due to the biopsy?

Yes  
  
1

No  
  
2

38. If you answered yes, please describe:

39. If you answered yes, how long after the biopsy did you have this for? (*tick one*)

|                          |                          |                          |                          |                          |                          |
|--------------------------|--------------------------|--------------------------|--------------------------|--------------------------|--------------------------|
| Days: 0-2                | 3-5                      | 6-10                     | 11-15                    | 16-20                    | 21-30                    |
| <input type="checkbox"/> |
| 1                        | 2                        | 3                        | 4                        | 5                        | 6                        |

40. If you answered yes, how much of a problem was this for you? (*tick one box*)

Not a problem

at all  
  
1

Minor Problem

2

Moderate Problem

3

Major Problem

4

41. If **another biopsy** in the future was medically necessary, how much of a problem would it be for you to undergo the same procedure? (*tick one box*)

Not a problem

at all  
  
1

Minor Problem

2

Moderate Problem

3

Major Problem

4

?

?

**Thank you for completing the questionnaire. Please post the questionnaire in the pre-paid self-addressed envelope or give to the research team at your next visit. Please contact us if you have any queries.**

?

2918  
2919  
2920

---

2921 PRECISE Protocol: *revision date*: 30 January 2017  
2922 Summary of Changes – Amendment 1  
2923 **PROTOCOL CHANGES:**  
2924 Protocol Version date change: 30January2017  
2925 Revisions to the protocol were necessary as a result of the protocol review by the  
2926 investigators involved in the trial. The following changes have been made to the  
2927 protocol as part of Amendment 1:  
2928 -Secondary Objectives: #7, #8 -page 3 -were omitted due to the challenges in  
2929 obtaining this information due to site variability in pathology reporting  
2930 -Secondary Objectives: addition of #12, #13 - page 4 -to determine impact Gd and  
2931 reading of PI-rads by radiologist  
2932 -Subject Inclusion Criteria clarification of #2, page 21 - no changes to the criteria  
2933 were made. Clarification was added to instructions on how to enter subjects into the  
2934 risk calculator.  
2935 -Table 1, 2, 3 -Schedule of Assessment, page 24, 26, 28 - added 2 new visits (q6 mos),  
2936 to obtain blood, and urine for correlative samples, if subject provided consent to  
2937 optional sampling.  
2938 -Table 1, 2, 3, -Schedule of Assessment, page 24, 26, 28 -clarification of how samples  
2939 are to be obtained, and their timelines  
2940 -Table 1, 2, 3 -Schedule of Assessment, page 24, 26, 28, -physical exam replaced with  
2941 vital and DRE.  
2942 -MRI Reporting -page 31, 32- clarification, revision of how MRI is to be reported by  
2943 the attending radiologist  
2944 -Pathology, page 34, removal of reporting of maximum cancer core length (MCCL)  
2945 due to too much site variability on reporting.  
2946 -Section 10.15.1 Optional Sample collection, page 37, -revision on the amount of  
2947 samples to be collected, more detailed information added  
2948 -removal of 2 questionnaires,- Appendix 5 and 6: 'Immediate post MRI  
2949 questionnaire', and '30 Post MRI questionnaire'  
2950 In addition to the above reference changes, minor administrative changes were  
2951 made to revise typos, grammatical errors, and spacing.  
2952 **INFORMED CONSENT CHANGES:**  
2953 ICF date change change: 30January2017  
2954 -Arm A: - page 3, 'approximately' added to clarify estimated timelines.  
2955 -Non-Experimental Procedures, -page 3: physical exam replaced with vitals, DRE as  
2956 per protocol change  
2957 -Questionnaires- page 3: ommitted, clarity added to the timelines requiring select  
2958 questionnaires  
2959  
2960 **OPTIONAL INFORMED CONSENT CHANGES:**  
2961 Optional ICF date change: 30January2017  
2962 -Purpose, page 1 - revised wording, no content change  
2963 -Study Procedure: -page 2: -clarification/revision of sampe collection quantity, and  
2964 timelines of collection.  
2965 -Confidentiality, page 3: -inclusion of study collaborators,  
2966 -Consent, page 5: order revised, no content change  
2967

---

2968 **1. Title Page**  
2969 *Full title:*  
2970 **A phase III multi-centre open-label randomized controlled trial of**  
2971 **multi-parametric magnetic resonance imaging (MRI)-targeted biopsy**  
2972 **compared to systematic trans-rectal ultrasound (TRUS) guided biopsy**  
2973 **for the diagnosis of prostate cancer in men without prior biopsy.**  
2974  
2975 1. **Short title: Prostate Evaluation for Clinically Important disease:**  
2976 **MRI vs Standard Evaluation procedures. (PRECISE)**  
2977  
2978 **Date: 30 January 2017**  
2979 **Version 2.0**  
2980  
2981 **Sponsor:**  
2982 Canadian Urology Research Consortium (CURC)  
2983  
2984 **Principal Investigator:**  
2985 Dr. Laurence Klotz  
2986 Professor of Surgery, University of Toronto  
2987 Sunnybrook Health Sciences Centre  
2988 2075 Bayview Avenue, #MG 408  
2989 Toronto Ontario M4N3M5 Canada  
2990 Voice 416 480 4673  
2991 Fax 416 480 6121  
2992  
2993 **Co-Principal Investigators:**  
2994 Dr. Masoom A. Haider  
2995 Sunnybrook Health Sciences Centre  
2996 2075 Bayview Avenue, Room AG 57  
2997 Toronto Ontario M4N 3M5 Canada  
2998  
2999 Dr. Andrew Loblaw  
3000 Sunnybrook Health Sciences Centre  
3001 2075 Bayview Avenue, Room T2 161  
3002 Toronto Ontario M4N 3M5 Canada  
3003  
3004 **Co- Investigators:**  
3005 Dr. Laurent Milot  
3006 Sunnybrook Health Sciences Centre  
3007 2075 Bayview Avenue, Room AG 279  
3008 Toronto Ontario M4N 3M5 Canada  
3009  
3010 Dr. Craig Earle  
3011 Sunnybrook Health Sciences Centre  
3012 2075 Bayview Avenue  
3013 Toronto Ontario M4N 3M5 Canada

3014  
3015  
3016  
3017  
3018  
3019  
3020  
3021  
3022  
3023  
3024  
3025  
3026  
3027  
3028  
3029  
3030  
3031  
3032  
3033  
3034  
3035  
3036  
3037  
3038  
3039  
3040  
3041  
3042  
3043  
3044  
3045  
3046  
3047  
3048  
3049  
3050

---

**Confidential**

The information provided in this document is strictly confidential and is intended solely for the guidance of the clinical investigation. Reproduction or disclosure of this document - whether in part or in full - to parties not associated with the clinical investigation, or its use for any other purpose, without the prior written consent of the PI is not permitted.

**2. Signature of Investigators**

**A phase III multi-centre open-label randomized controlled trial of multi-parametric magnetic resonance imaging (MRI)-targeted biopsy compared to systematic trans-rectal ultrasound (TRUS) guided biopsy for the diagnosis of prostate cancer in men without prior biopsy.**

**Date: 30 January 2017**  
**Version 2.0**

The signatory agrees to the content of the final clinical study protocol as presented.

Signature: \_\_\_\_\_

Name: \_\_\_\_\_

Title: \_\_\_\_\_

Date: \_\_\_\_\_

Site name: \_\_\_\_\_



### 3. Synopsis

|                      |                                                                                                                                                                                                                                                                                                                                                                                                                                                                                                                                                                                                                                                                                                                                                                                                                                                                                                                                                                                                                                                                                                                                                                                                                                                                                                                                                                                                                                                                                                                                                                                                                                                                                                                                                                                                                                                             |
|----------------------|-------------------------------------------------------------------------------------------------------------------------------------------------------------------------------------------------------------------------------------------------------------------------------------------------------------------------------------------------------------------------------------------------------------------------------------------------------------------------------------------------------------------------------------------------------------------------------------------------------------------------------------------------------------------------------------------------------------------------------------------------------------------------------------------------------------------------------------------------------------------------------------------------------------------------------------------------------------------------------------------------------------------------------------------------------------------------------------------------------------------------------------------------------------------------------------------------------------------------------------------------------------------------------------------------------------------------------------------------------------------------------------------------------------------------------------------------------------------------------------------------------------------------------------------------------------------------------------------------------------------------------------------------------------------------------------------------------------------------------------------------------------------------------------------------------------------------------------------------------------|
| Title                | A phase III multi-centre, open-label randomized controlled trial of multi-parametric magnetic resonance imaging (MRI)-targeted biopsy compared to systematic trans-rectal ultrasound (TRUS) guided biopsy for the diagnosis of prostate cancer in men without prior biopsy.                                                                                                                                                                                                                                                                                                                                                                                                                                                                                                                                                                                                                                                                                                                                                                                                                                                                                                                                                                                                                                                                                                                                                                                                                                                                                                                                                                                                                                                                                                                                                                                 |
| Short Title          | Prostate Evaluation for Clinically Important disease: MRI vs Standard Evaluation procedures. (PRECISE)                                                                                                                                                                                                                                                                                                                                                                                                                                                                                                                                                                                                                                                                                                                                                                                                                                                                                                                                                                                                                                                                                                                                                                                                                                                                                                                                                                                                                                                                                                                                                                                                                                                                                                                                                      |
| Clinical study phase | Phase III                                                                                                                                                                                                                                                                                                                                                                                                                                                                                                                                                                                                                                                                                                                                                                                                                                                                                                                                                                                                                                                                                                                                                                                                                                                                                                                                                                                                                                                                                                                                                                                                                                                                                                                                                                                                                                                   |
| Study Objectives     | <p><b>Primary Objective</b></p> <p>To determine whether the proportion of men with clinically significant cancer (Gleason <math>\geq 7</math>) detected by MRI-targeted biopsy is no less than systematic TRUS guided biopsy.</p> <p><b>Secondary Objectives</b></p> <ol style="list-style-type: none"> <li>14. To determine whether the proportion of men with clinically significant cancer (Gleason <math>\geq 7</math>) detected by MRI-targeted biopsy is greater than systematic TRUS guided biopsy.</li> <li>15. Proportion of men in each arm with clinically insignificant cancer detected.</li> <li>16. Proportion of men in each arm with Gleason <math>\geq 4+3</math> detected.</li> <li>17. Proportion of men in MRI arm who avoid biopsy.</li> <li>18. Proportion of men in the MRI arm whom the PI-RADS score for suspicion of clinically significant cancer was 3, 4 or 5 but no clinically significant cancer was detected.</li> <li>19. Proportion of men in each arm who go on to definitive local treatment (e.g. radical prostatectomy, radiotherapy, brachytherapy) or systemic treatment (e.g. hormone therapy, chemotherapy).</li> <li>20. Proportion of men with a negative MRI who develop a positive MRI and/ or Gleason <math>\geq 7</math> cancer by 2 years.</li> <li>21. Proportion of men with post-biopsy adverse events</li> <li>22. Health-related quality of life scores.</li> <li>23. Proportion with Gleason grade upgrading in men undergoing radical prostatectomy.</li> <li>24. To determine the cost per diagnosis of cancer.</li> <li>25. To determine the impact of the addition of Gd based contrast compared to a non contrast abbreviated MRI protocol on target yield</li> <li>26. To determine if a radiologist Likert score not based on Pi-Rads has a better target yield than Pi_Rads alone</li> </ol> |
| Test procedures      | Subjects will be randomized to either<br><b>ARM A:</b> multi-parametric magnetic resonance imaging (MRI)                                                                                                                                                                                                                                                                                                                                                                                                                                                                                                                                                                                                                                                                                                                                                                                                                                                                                                                                                                                                                                                                                                                                                                                                                                                                                                                                                                                                                                                                                                                                                                                                                                                                                                                                                    |

|                                           |                                                                                                                                                                                                                                                                                                                                                                                                                                                                                                                                                                                                                                                                                                                                                                               |
|-------------------------------------------|-------------------------------------------------------------------------------------------------------------------------------------------------------------------------------------------------------------------------------------------------------------------------------------------------------------------------------------------------------------------------------------------------------------------------------------------------------------------------------------------------------------------------------------------------------------------------------------------------------------------------------------------------------------------------------------------------------------------------------------------------------------------------------|
|                                           | <p>which, depending on outcome, may be followed by (MRI)-targeted biopsy.</p> <p><b>ARM B:</b> systematic trans-rectal ultrasound (TRUS) guided biopsy.</p> <p>Subjects in both arms will complete a number of different questionnaires and will have PSA measurements taken. If subjects consent to participate in correlative studies, they will also need to provide blood, urine, semen and tissue samples at pre-specified time points.</p>                                                                                                                                                                                                                                                                                                                              |
| Indication                                | Clinical suspicion of prostate cancer, based on PSA or results of digital rectal exam, with no prior biopsy.                                                                                                                                                                                                                                                                                                                                                                                                                                                                                                                                                                                                                                                                  |
| Diagnosis and main criteria for inclusion | <p>In order to be eligible, <u>all</u> inclusion criteria must be met.</p> <p>6. Men at least 18 years of age referred with clinical suspicion of prostate cancer who have been advised to have a prostate biopsy;</p> <p>7. <math>\geq 5\%</math> chance of high-grade prostate cancer as calculated using individualized risk assessment of prostate cancer calculator, PCPTRC 2.0, found at <a href="http://deb.uthscsa.edu/URORiskCalc/Pages/calcs.jsp">http://deb.uthscsa.edu/URORiskCalc/Pages/calcs.jsp</a>; For men under age 55, the default age of 55 should be entered on the risk calculator.</p> <p>8. Serum PSA <math>\leq 20</math>ng/ml;</p> <p>9. Fit to undergo all procedures listed in protocol;</p> <p>10. Able to provide written informed consent.</p> |
| Exclusion Criteria                        | <p>Men who meet the following criteria at the time of screening will be excluded:</p> <p>7. Prior prostate biopsy;</p> <p>8. Prior treatment for prostate cancer;</p> <p>9. Contraindication to MRI (e.g. claustrophobia, pacemaker, estimated GFR <math>\leq 50</math>mls/min);</p> <p>10. Contraindication to prostate biopsy;</p> <p>11. Men in whom artifact would reduce the quality of the MRI; i.e, previous hip replacement surgery, metallic hip replacement or extensive pelvic orthopaedic metal work;</p> <p>12. Unfit to undergo any procedures listed in protocol.</p>                                                                                                                                                                                          |
| Study Design                              | This is a multi-centre open-label, randomized two arm study. Men are either randomized to receive MRI or a systematic trans-rectal ultrasound (TRUS) guided biopsy.                                                                                                                                                                                                                                                                                                                                                                                                                                                                                                                                                                                                           |
| Methodology                               | <p>Eligible subjects will be randomized in a 1:1 ratio to receive either (ARM A) multi-parametric magnetic resonance imaging (MRI) which, depending on outcome, may be followed by (MRI)-targeted biopsy, or (ARM B) systematic trans-rectal ultrasound (TRUS) guided biopsy. The time frame for data collection is shown in Appendix 1.</p> <p><u>All subjects</u> will have a PSA test prior to, or at Visit 1, and will complete a baseline EQ-5D-5L questionnaire. In addition, they will contribute optional blood, urine, semen and tissue samples if they consent to correlative studies.</p>                                                                                                                                                                          |

|                               |                                                                                                                                                                                                                                                                                                                                                                                                                                                                                                                                                                                                                                                                                                                                                                                                                                                                                                                                                                                                                                                                                                                                                                                                                                                                                                                                                                                                                                                                                                                                                                         |
|-------------------------------|-------------------------------------------------------------------------------------------------------------------------------------------------------------------------------------------------------------------------------------------------------------------------------------------------------------------------------------------------------------------------------------------------------------------------------------------------------------------------------------------------------------------------------------------------------------------------------------------------------------------------------------------------------------------------------------------------------------------------------------------------------------------------------------------------------------------------------------------------------------------------------------------------------------------------------------------------------------------------------------------------------------------------------------------------------------------------------------------------------------------------------------------------------------------------------------------------------------------------------------------------------------------------------------------------------------------------------------------------------------------------------------------------------------------------------------------------------------------------------------------------------------------------------------------------------------------------|
|                               | <p><u>All subjects in ARM A</u> will complete an EQ-5D-5L questionnaire and an immediate post-MRI/TRUS Fusion Biopsy questionnaire following the MRI.</p> <p><u>Subjects in ARM A who do not receive a subsequent biopsy</u> will complete an EQ-5D-5L questionnaire when they find out the results of the MRI 3 weeks (<math>\pm</math> 1 week) after the procedure. They will have another MRI and PSA test 2 years after the initial MRI. When they complete the study after 2 years of follow up, they will complete another EQ-5D-5L questionnaire.</p> <p><u>Subjects in ARM A who do receive a MRI-targeted biopsy</u> will complete and an immediate post-biopsy questionnaire at the time of the biopsy, another an EQ-5D-5L questionnaire and a 30-day post biopsy questionnaire when they find out the results of the biopsy, 3 weeks (<math>\pm</math> 1 week) after the procedure. They will have an additional PSA test every 6 months for two years, and at the end of 2 years of follow up, they will complete another EQ-5D-5L questionnaire.</p> <p><u>All subjects in ARM B</u> will complete an immediate post-biopsy questionnaire following the standardized TRUS-guided biopsy. They will complete another EQ-5D-5L questionnaire and a 30-day post biopsy questionnaire when they find out the results of the biopsy, 3 weeks (<math>\pm</math> 1 week) after the procedure. They will have an additional PSA test every 6 months for two years, and at the end of 2 years of follow up, they will complete another EQ-5D-5L questionnaire.</p> |
| Type of control               | This is an open-label randomized study.                                                                                                                                                                                                                                                                                                                                                                                                                                                                                                                                                                                                                                                                                                                                                                                                                                                                                                                                                                                                                                                                                                                                                                                                                                                                                                                                                                                                                                                                                                                                 |
| Number of subjects            | This study requires 422 subjects (211 in each arm). To account for potential withdrawal / loss to follow up and the effect of stratification, the sample size will be inflated by 5%, and a target of <b>450 men</b> will be recruited.                                                                                                                                                                                                                                                                                                                                                                                                                                                                                                                                                                                                                                                                                                                                                                                                                                                                                                                                                                                                                                                                                                                                                                                                                                                                                                                                 |
| Primary endpoint              | The proportion of men in each arm with clinically significant cancer (Gleason $\geq$ 7) will be calculated based on histology results from biopsy procedures. Analysis will be on the per protocol study population.                                                                                                                                                                                                                                                                                                                                                                                                                                                                                                                                                                                                                                                                                                                                                                                                                                                                                                                                                                                                                                                                                                                                                                                                                                                                                                                                                    |
| Secondary endpoints           | See section 7.4                                                                                                                                                                                                                                                                                                                                                                                                                                                                                                                                                                                                                                                                                                                                                                                                                                                                                                                                                                                                                                                                                                                                                                                                                                                                                                                                                                                                                                                                                                                                                         |
| Plan for statistical analysis | See section 14.0.                                                                                                                                                                                                                                                                                                                                                                                                                                                                                                                                                                                                                                                                                                                                                                                                                                                                                                                                                                                                                                                                                                                                                                                                                                                                                                                                                                                                                                                                                                                                                       |
| Funding                       | The total budget for this trial is \$3,000,000. (see attached). Ontario Institute for Cancer Research (OICR) has committed to \$1,500,000 in support of this study (letter appended). We hope to obtain the additional \$1,500,000 from the Movember Accelerated Translational Research Grant Competition                                                                                                                                                                                                                                                                                                                                                                                                                                                                                                                                                                                                                                                                                                                                                                                                                                                                                                                                                                                                                                                                                                                                                                                                                                                               |

3053  
3054

---

|      |                                                                                          |           |
|------|------------------------------------------------------------------------------------------|-----------|
| 3055 | <b>Table of Contents</b>                                                                 |           |
| 3056 | <b>1. TITLE PAGE</b> .....                                                               | <b>1</b>  |
| 3057 | <b>2.SIGNATURE OF INVESTIGATORS</b> .....                                                | <b>11</b> |
| 3058 | <b>3. SYNOPSIS</b> .....                                                                 | <b>12</b> |
| 3059 | <b>4. ABBREVIATIONS AND DEFINITIONS</b> .....                                            | <b>18</b> |
| 3060 | <b>5. TRIAL SUMMARY</b> .....                                                            | <b>19</b> |
| 3061 | 5.1 AIM AND RATIONALE .....                                                              | 19        |
| 3062 | 5.2 METHODS .....                                                                        | 191       |
| 3063 | 5.3 PARTICIPATING SITES.....                                                             | 21        |
| 3064 | 5.4 STUDY OUTCOMES .....                                                                 | 21        |
| 3065 | 5.4.1 <i>Primary outcome</i> .....                                                       | 21        |
| 3066 | 5.4.2 <i>Secondary outcomes</i> .....                                                    | 21        |
| 3067 | <b>6. BACKGROUND</b> .....                                                               | <b>22</b> |
| 3068 | 6.1 PROSTATE CANCER DIAGNOSIS .....                                                      | 22        |
| 3069 | 6.2 CLINICALLY SIGNIFICANT VERSUS CLINICALLY INSIGNIFICANT PROSTATE CANCER.....          | 22        |
| 3070 | 6.3 CURRENT STANDARD OF CARE: SYSTEMATIC TRUS GUIDED BIOPSY .....                        | 23        |
| 3071 | 6.4 THE EMERGING ROLE OF MRI IN PROSTATE CANCER DIAGNOSIS AND TREATMENT .....            | 23        |
| 3072 | 6.4.1 <i>The role of imaging in prostate cancer diagnosis</i> .....                      | 23        |
| 3073 | 6.4.2 <i>Limitations of early MRI studies in prostate cancer</i> .....                   | 23        |
| 3074 | 6.4.3 <i>Emerging role of MRI in the diagnosis of prostate cancer</i> .....              | 24        |
| 3075 | 6.4.4 <i>Prostate cancer detection rates of MRI-targeted biopsy are similar to other</i> |           |
| 3076 | <i>methods</i> .....                                                                     | 26        |
| 3077 | 6.4.5 <i>Limitations of studies reporting MPMRI-targeted prostate biopsy</i> .....       | 26        |
| 3078 | 6.5 NOVELTY OF PRECISE .....                                                             | 27        |
| 3079 | <b>7. TRIAL OBJECTIVES</b> .....                                                         | <b>27</b> |
| 3080 | 7.1 OVERALL AIM .....                                                                    | 27        |
| 3081 | 7.2 HYPOTHESES .....                                                                     | 27        |
| 3082 | 7.3 PRIMARY OBJECTIVE.....                                                               | 27        |
| 3083 | 7.4 SECONDARY OBJECTIVES .....                                                           | 28        |
| 3084 | 7.5 EXPLANATION FOR NON-INFERIORITY HYPOTHESIS .....                                     | 28        |
| 3085 | 7.6 ANTICIPATED TIMELINE OF STUDY PROGRESSION .....                                      | 28        |
| 3086 | <b>8. STUDY POPULATION</b> .....                                                         | <b>29</b> |
| 3087 | 8.1 NUMBER OF SUBJECTS .....                                                             | 29        |
| 3088 | 8.2 SUBJECT INCLUSION CRITERIA .....                                                     | 29        |
| 3089 | 8.3 SUBJECT EXCLUSION CRITERIA.....                                                      | 29        |
| 3090 | <b>9. STUDY DESIGN</b> .....                                                             | <b>30</b> |
| 3091 | 9.1 STUDY DESIGN .....                                                                   | 30        |
| 3092 | 9.2 STUDY TRIAL SCHEMA.....                                                              | 31        |
| 3093 | 9.3 TIMELINE OF SUBJECT CONTACT .....                                                    | 32        |
| 3094 | <b>10. TRIAL INTERVENTIONS AND PROCEDURES</b> .....                                      | <b>36</b> |
| 3095 | 10.1 EQ-5D-5L QUESTIONNAIRES.....                                                        | 36        |
| 3096 | 10.2 MULTIPARAMETRIC MRI IMAGING PROCEDURE .....                                         | 36        |
| 3097 | 10.2.1 <i>MRI Protocol</i> .....                                                         | 36        |
| 3098 | 10.2.2 <i>MRI reporting</i> .....                                                        | 37        |
| 3099 | 10.3 NO TARGET IDENTIFIED ON MPMRI (PIRADS 1 OR 2).....                                  | 38        |
| 3100 | 10.4 MRI-TARGETED BIOPSY .....                                                           | 38        |
| 3101 | 10.4.1 <i>MRI choice of targets for targeted biopsy</i> .....                            | 38        |

|      |                                                                                      |           |
|------|--------------------------------------------------------------------------------------|-----------|
| 3102 | 10.4.2 MRI Biopsy .....                                                              | 39        |
| 3103 | 10.5 SYSTEMATIC TRUS GUIDED BIOPSY .....                                             | 402       |
| 3104 | 10.6 PATHOLOGY .....                                                                 | 40        |
| 3105 | 10.7 POST-PROCEDURAL CARE .....                                                      | 40        |
| 3106 | 10.8 IMMEDIATE POST-BIOPSY QUESTIONNAIRE .....                                       | 40        |
| 3107 | 10.9 30-DAY POST-BIOPSY QUESTIONNAIRE.....                                           | 41        |
| 3108 | 10.10 RESULTS AND TREATMENT DECISION (VISIT 4).....                                  | 41        |
| 3109 | 10.11 FOLLOW UP PERIOD.....                                                          | 42        |
| 3110 | 10.12 ADDITIONAL TESTS FOR BIOMARKER DISCOVERY - OPTIONAL .....                      | 43        |
| 3111 | 10.12.1 Samples to be collected for future biomarker discovery work (Optional) ..... | 43        |
| 3112 | 10.13 LONG-TERM DATA LINKAGE – PERMISSION TO CONTACT .....                           | 43        |
| 3113 | 10.14 END OF STUDY .....                                                             | 44        |
| 3114 | 10.15 RISKS AND BENEFITS TO PARTICIPANTS .....                                       | 44        |
| 3115 | 10.15.1 Risks to subjects.....                                                       | 44        |
| 3116 | 10.15.2 Benefits to subjects.....                                                    | 46        |
| 3117 | 10.16 CONCOMITANT MEDICATIONS .....                                                  | 46        |
| 3118 | 10.16.1 Permitted Medications .....                                                  | 46        |
| 3119 | 10.16.2 Non-Drug Therapies.....                                                      | 46        |
| 3120 | <b>11. SCHEDULE OF STUDY VISITS .....</b>                                            | <b>47</b> |
| 3121 | 11.1 VISIT 1 (SCREENING/RANDOMIZATION): SCREENING, CONSENT, RANDOMIZATION.....       | 47        |
| 3122 | 11.2 VISIT 2 (MRI): ARM A, FOR MEN RANDOMIZED TO MRI .....                           | 47        |
| 3123 | 11.3 VISIT 3 (BIOPSY): ARM A, MRI-TARGETED BIOPSY OF PROSTATE .....                  | 47        |
| 3124 | 11.4 VISIT 3 (BIOPSY): ARM B, FOR MEN RANDOMIZED TO A SYSTEMATIC TRUS-BIOPSY .....   | 48        |
| 3125 | 11.5 VISIT 4 (POST-TEST FOLLOW UP): ARM A, FOR MEN WHO DID NOT RECEIVE A BIOPSY..... | 49        |
| 3126 | 11.6 VISIT 4 (POST-TEST FOLLOW UP): FOR ALL MEN WHO RECEIVED A BIOPSY .....          | 49        |
| 3127 | 11.7 VISIT 5 ( 6 MONTH FOLLOW UP):.....                                              | 40        |
| 3128 | 11.8 VISIT 6 (1 YEAR FOLLOW UP): 52 WEEK FOLLOW UP .....                             | 49        |
| 3129 | 11.9 VISIT 7 (18 MONTH FOLLOW UP):.....                                              | 41        |
| 3130 | 11.8 VISIT 8 (2 YEAR FOLLOW UP): END OF STUDY.....                                   | 50        |
| 3131 | <b>12. RANDOMIZATION .....</b>                                                       | <b>50</b> |
| 3132 | 12.1 REGISTRATION AND RANDOMIZATION PROCEDURE.....                                   | 50        |
| 3133 | 12.2 STRATIFICATION.....                                                             | 51        |
| 3134 | 12.3 BLINDING AND MEASURES TAKEN TO AVOID BIAS .....                                 | 51        |
| 3135 | <b>13. DATA.....</b>                                                                 | <b>51</b> |
| 3136 | <b>14. STATISTICAL CONSIDERATIONS .....</b>                                          | <b>52</b> |
| 3137 | 14.1 SAMPLE SIZE CALCULATION .....                                                   | 52        |
| 3138 | 14.2 INTERIM ANALYSIS .....                                                          | 46        |
| 3139 | 14.3 POPULATIONS: .....                                                              | 55        |
| 3140 | 14.4 PRIMARY OUTCOME.....                                                            | 55        |
| 3141 | 14.5 SECONDARY OUTCOMES .....                                                        | 55        |
| 3142 | <b>15. PARTICIPANT COMPLIANCE AND WITHDRAWAL .....</b>                               | <b>59</b> |
| 3143 | 15.1 SUBJECT WITHDRAWAL FROM STUDY.....                                              | 59        |
| 3144 | 15.2 STUDY COMPLETION .....                                                          | 60        |
| 3145 | <b>16. DATA MONITORING, QUALITY CONTROL AND SAFETY.....</b>                          | <b>60</b> |
| 3146 | 16.1 STOPPING / DISCONTINUATION RULES .....                                          | 60        |
| 3147 | 16.2 MONITORING, QUALITY CONTROL AND ASSURANCE .....                                 | 61        |
| 3148 | 16.3 ASSESSMENT OF SAFETY .....                                                      | 61        |
| 3149 | 16.3.1 Definition of an Adverse Event (AE) .....                                     | 61        |
| 3150 | 16.3.2 Definition of a Serious Adverse Event (SAE).....                              | 61        |
| 3151 | 16.3.3 Disease-Related Events or Outcomes Not Qualifying as SAEs.....                | 62        |

|      |                                                                                    |           |
|------|------------------------------------------------------------------------------------|-----------|
| 3152 | 16.3.4 Lack of Efficacy.....                                                       | 62        |
| 3153 | 16.3.5 Clinical Laboratory Abnormalities and Other Abnormal Assessments as AEs and |           |
| 3154 | SAEs.....                                                                          | 62        |
| 3155 | 16.3.6 Recording/Reporting AEs and SAEs .....                                      | 63        |
| 3156 | 16.3.7 Evaluating AEs and SAEs.....                                                | 64        |
| 3157 | 16.3.8 Follow-up of AEs and SAEs.....                                              | 65        |
| 3158 | 16.3.9 Prompt Reporting of SAEs.....                                               | 65        |
| 3159 | 16.3.10 Post-study AEs and SAEs .....                                              | 66        |
| 3160 | <b>17. STUDY ADMINISTRATION .....</b>                                              | <b>66</b> |
| 3161 | 17.1 REGULATORY AND ETHICAL CONSIDERATIONS.....                                    | 66        |
| 3162 | 17.1.1 Ethical Conduct of the Study and Ethics Approval .....                      | 66        |
| 3163 | 17.1.2 Informed Consent.....                                                       | 67        |
| 3164 | 17.1.3 Investigator Reporting Requirements.....                                    | 67        |
| 3165 | 17.2 STUDY MONITORING .....                                                        | 67        |
| 3166 | 17.3 QUALITY ASSURANCE.....                                                        | 68        |
| 3167 | 17.4 STUDY AND SITE CLOSURE .....                                                  | 68        |
| 3168 | 17.5 RECORDS RETENTION .....                                                       | 69        |
| 3169 | 17.6 DATA MANAGEMENT .....                                                         | 69        |
| 3170 | 17.7 PUBLICATION .....                                                             | 69        |
| 3171 | <b>18. REFERENCES.....</b>                                                         | <b>71</b> |
| 3172 | <b>APPENDICES .....</b>                                                            | <b>76</b> |
| 3173 | APPENDIX 1: TIME WINDOWS FOR DATA COLLECTION .....                                 | 76        |
| 3174 | APPENDIX 2: MPMRI REPORTING PROFORMA .....                                         | 81        |
| 3175 | APPENDIX 3: EXAMPLE OF SYSTEMATIC TRUS GUIDED BIOPSYSCHEMA.....                    | 83        |
| 3176 | APPENDIX 4: 2-PAGE EQ-5D-5L QUESTIONNAIRE .....                                    | 84        |
| 3177 | APPENDIX 5: IMMEDIATE POST BIOPSY QUESTIONNAIRE.....                               | 83        |
| 3178 | APPENDIX 6: 30-DAY POST BIOPSY QUESTIONNAIRE.....                                  | 86        |
| 3179 |                                                                                    |           |
| 3180 |                                                                                    |           |
| 3181 |                                                                                    |           |
| 3182 |                                                                                    |           |

---

#### 3183 4. Abbreviations and definitions

##### 3184 Abbreviations:

|      |          |                                                     |
|------|----------|-----------------------------------------------------|
| 3185 |          |                                                     |
| 3186 | ADC      | Apparent diffusion coefficient                      |
| 3187 | CI       | Confidence interval                                 |
| 3188 | CRF      | Case report form                                    |
| 3189 | DSMC     | Data Safety and Monitoring Committee                |
| 3190 | DRE      | Digital rectal examination                          |
| 3191 | DWI      | Diffusion weighted imaging                          |
| 3192 | DCE      | Dynamic contrast enhancement                        |
| 3193 | EDC      | Electronic Data Capture                             |
| 3194 | ITT      | Intention to treat                                  |
| 3195 | MCCL     | Maximum cancer core length                          |
| 3196 | MPMRI    | Multi-parametric MRI, used interchangeably with MRI |
| 3197 |          | in this protocol.                                   |
| 3198 | MPMRI-TB | Multi-parametric magnetic resonance image-targeted  |
| 3199 |          | biopsy of the prostate                              |
| 3200 | MRI      | Magnetic resonance imaging, used interchangeably    |
| 3201 |          | with MPMRI in this protocol                         |
| 3202 | MRI-TB   | Magnetic resonance imaging targeted biopsy          |
| 3203 | MRS      | Magnetic resonance spectroscopy                     |
| 3204 | PI       | Principal Investigator                              |
| 3205 | PI-RADS  | Prostate Imaging Reporting and Data System          |
| 3206 | PTC      | Permission to Contact                               |
| 3207 | PSA      | Prostate specific antigen                           |
| 3208 | REB      | Research Ethics Board                               |
| 3209 | STARD    | Standards for the reporting of diagnostic studies   |
| 3210 | TRUS     | Trans-rectal ultrasound                             |
| 3211 | TSC      | Trial Steering Committee                            |
| 3212 | T2W      | T2-weighted imaging                                 |

3213

3214

##### 3215 Definitions:

3216

|      |                       |                                                |
|------|-----------------------|------------------------------------------------|
| 3217 | MPMRI-targeted biopsy | A biopsy technique where an MPMRI scan is      |
| 3218 |                       | used to determine the location of a suspicious |
| 3219 |                       | target prior to biopsy.                        |

3220

|      |                               |                                               |
|------|-------------------------------|-----------------------------------------------|
| 3221 | Systematic TRUS guided biopsy | A biopsy approach where conduct of procedure  |
| 3222 |                               | is not influenced by findings on MRI imaging. |
| 3223 |                               | Currently this is the standard of care for    |
| 3224 |                               | prostate cancer in the province of Ontario.   |

3225

3226

3227

---

3228 **5. Trial summary**

3229

3230 **5.1 Aim and Rationale**

3231

3232 The standard pathway for prostate cancer diagnosis is trans-rectal ultrasound guided  
3233 (TRUS) biopsy of the prostate following an elevated PSA. TRUS guidance is  
3234 performed primarily for anatomic guidance as the ultrasound poorly discriminates  
3235 between cancerous and non-cancerous tissue. TRUS guided prostate biopsies are  
3236 concentrated in areas of the peripheral zone, thought to harbor the majority of  
3237 cancer.

3238

3239 An alternative pathway for prostate cancer diagnosis in men with elevated PSA is to  
3240 perform multi-parametric magnetic resonance imaging (MPMRI) to localize cancer.  
3241 This information is used to direct a subsequent biopsy, known as an MRI-targeted  
3242 biopsy. MRI-targeted biopsy has been shown in preliminary studies to detect a  
3243 similar or greater amount of clinically significant cancer than systematic TRUS guided  
3244 biopsy and has several other potential advantages including: the ability to  
3245 differentiate between clinically significant and insignificant cancer, reducing  
3246 unnecessary biopsy and fewer numbers of biopsy cores, reducing biopsy-related  
3247 side-effects.

3248

3249 A 'clinically insignificant cancer' is cancer that is unlikely to progress or to affect an  
3250 individual's life expectancy and therefore does not warrant treatment. However  
3251 when diagnosed with low grade cancer that is likely to be insignificant, a large  
3252 proportion of subjects request treatment in case a more significant cancer is  
3253 present[1]. A challenge in this area is that subjects are typically not aware that their  
3254 cancer is clinically insignificant, and often view the early diagnosis and aggressive  
3255 treatment they have been subjected to as life-saving.

3256 A prostate cancer detection procedure that differentiates clinically significant cancer  
3257 from clinically insignificant cancer is therefore a major unmet need.

3258

3259 The potential implications of this trial include:

3260

- A redefinition of the prostate cancer diagnostic pathway;
- A reduction in the number of subjects undergoing prostate biopsy;
- A reduction in the number of biopsy cores taken per subject;
- A reduction in biopsy-related adverse events including sepsis and pain;
- A reduction in the over-diagnosis of clinically insignificant prostate cancer;
- A reduction in the economic burden of diagnosing and treating prostate cancer.

3267

3268

3269



---

## 5.2 Methods

3270

3271

3272 Men referred with clinical suspicion of prostate cancer who have had no prior biopsy

3273 are randomized to either systematic TRUS guided biopsy(standard of care) or to a

3274 multi-parametric MRI (MPMRI) arm (the investigational arm). In the MRI arm, areas

3275 of the prostate are scored on a 5-point scale of suspicion for clinically significant

3276 cancer based on the Prostate Imaging Reporting and Data System

3277 (PI-RADS) v2[2]:

3278 PI-RADS 1 – Very low (clinically significant cancer is highly unlikely to be  
3279 present)

3280 PI-RADS 2 – Low (clinically significant cancer is unlikely to be present)

3281 PI-RADS 3 – Intermediate (the presence of clinically significant cancer is  
3282 equivocal)

3283 PI-RADS 4 – High (clinically significant cancer is likely to be present)

3284 PI-RADS 5 – Very high (clinically significant cancer is highly likely to be  
3285 present)

3286

3287 Each suspicious area will be given a separate score as described by consensus

3288 meeting recommendations [2, 3]. Lesions scoring 3, 4 or 5 will undergo targeted

3289 biopsy; up to three suspicious areas will be targeted.

3290

3291 In the control arm, subjects will undergo a standard 12 core systematic TRUS guided

3292 biopsy as per standard recommendations[4]. Suspicious sono graphic lesions will be

3293 targeted (12 cores *in toto*).

3294

3295 Pathologic findings from all biopsies will be recorded and will undergo statistical  
3296 analysis (see statistics section, 14.0).

3297

3298 In both arms, self-reported questionnaires to capture biopsy-specific side effects will

3299 be administered immediately post-procedure, and at the post-procedure

3300 appointment which will take place 3 weeks ( $\pm$  1 week) after the procedure. Euro QOL

3301 group 5 domain EQ-5D-5L questionnaires or a comparable QOL instrument will also

3302 be completed at baseline (prior to MRI or TRUS biopsy), 24 hours post MRI and 24

3303 hours post-biopsy. Men will be followed up for 30-days post intervention and until a

3304 treatment decision is made and recorded. Pathology results from men requiring a

3305 radical prostatectomy will be recorded.

3306

3307 Men will complete the trial after they complete treatment for prostate cancer

3308 (radical prostatectomy) or the required follow-up procedures for each arm are met

3309 (see study timelines, section 9.3). Once men complete the trial, they revert to

3310 standard of care.

3311

3312 Annual questionnaires will be administered for all men with negative biopsy in both

3313 arms during a two-year follow-up period to determine cancer and treatment status.

3314

3315 No diagnostic test is perfect, and even with the best test some cancers may be

3316 missed. To minimize the risk of false negatives, men with negative biopsy results will

---

3317 be followed with serial PSA testing; PSA levels will increase if cancer is present. In  
3318 addition to serial PSA testing, in this study men who had a negative MRI (defined as  
3319 no cancer detected) and do not have a biopsy will have a follow up MRI at 24  
3320 months.

3321  
3322 As recruitment is expected to take up to 24 months (see section 7.6) and each  
3323 subject will be followed up for two years, the estimated maximal duration of this  
3324 study is four years in total. The primary endpoint will be reached at approximately 2  
3325 years after study initiation.

### 3326 **5.3 Participating Sites**

3327 This is a multi-centre study. Institutions participating in the study must be able to  
3328 perform both the systematic TRUS guided biopsy and the MRI-TB. They must be able  
3329 to randomize men to one of these two diagnostic tests.

3330

3331 We expect to recruit 3-6 subjects per month per site, based on recruitment rates  
3332 from previous diagnostic trials performed by the centers involved. A typical centre  
3333 sees 15-30 eligible men per month. We expect 5 recruitment sites, with 100 men to  
3334 be recruited at each site over an 18-24 month period (see section 7.6).

### 3335 **5.4 Study outcomes**

#### 3336 **5.4.1 Primary outcome**

3337 To determine whether the proportion of men with clinically significant cancer  
3338 (Gleason  $\geq 7$ ) detected by MRI-targeted biopsy is no less than systematic TRUS  
3339 guided biopsy.

#### 3340 **5.4.2 Secondary outcomes**

3341 14. To determine whether the proportion of men with clinically significant cancer  
3342 (Gleason  $\geq 7$ ) detected by MRI-targeted biopsy is greater than systematic TRUS  
3343 guided biopsy.

3344 15. Proportion of men in each arm with clinically insignificant cancer detected.

3345 16. Proportion of men in each arm with Gleason  $\geq 4+3$  detected.

3346 17. Proportion of men in MRI arm who avoid biopsy.

3347 18. Proportion of men in the MRI arm whom the PI-RADS score for suspicion of  
3348 clinically significant cancer was 3, 4 or 5 but no clinically significant cancer was  
3349 detected.

3350 19. Proportion of men in each arm who go on to definitive local treatment (e.g.  
3351 radical prostatectomy, radiotherapy, brachytherapy) or systemic treatment (e.g.  
3352 hormone therapy, chemotherapy).

3353 20. Proportion of men with a negative MRI who develop a positive MRI and/ or  
3354 Gleason  $\geq 7$  cancer by 2 years.

3355 21. Proportion of men with post-biopsy adverse events

3356 22. Health-related quality of life scores.

3357 23. Proportion with Gleason grade upgrading in men undergoing radical  
3358 prostatectomy.

3359 24. To determine the cost per diagnosis of cancer.

- 
- 3360 25. To determine the impact of the addition of Gd based contrast compared to a non  
3361 contrast abbreviated MRI protocol on target yield  
3362 26. To determine if a radiologist Likert score not based on Pi-Rads has a better target  
3363 yield than Pi\_Rads alone  
3364  
3365

## 3366 **6. Background**

### 3367 **6.1 Prostate cancer diagnosis**

3368 Prostate cancer is the most common male cancer in the Western world with an  
3369 incidence of 24,000 new cases in Canada and 233,000 in the USA[5, 6]. It is the  
3370 second most common cause of cancer death in European and North American men,  
3371 with 2,900 deaths per year in Canada and 90,000 deaths per year in Europe[5, 6].  
3372 The incidence of the disease has increased by 22% over the last decade due to the  
3373 widespread use of the prostate specific antigen (PSA) blood test; by 2030 the  
3374 Canadian Cancer Society estimates the incidence of prostate cancer will be 42,225.As  
3375 prostate cancer is a histopathological diagnosis, men with raised PSA or abnormal  
3376 digital rectal examination (DRE) are usually referred for a prostate biopsy. Over one  
3377 million prostate biopsies are performed in North America and Europe every year[7].  
3378

### 3379 **6.2 Clinically significant versus clinically insignificant prostate cancer**

3380  
3381 Clinically significant prostate cancer is cancer that is likely to progress and affect a  
3382 man's life expectancy if left untreated. Though there is no universally agreed upon  
3383 definition on what histological parameters define clinically significant cancer, most  
3384 agree that larger volume cancers with a higher Gleason grade are more likely to be  
3385 clinically significant; an historically accepted threshold is a tumour volume above  
3386 0.5milliliters or any Gleason pattern 4 or 5 cancer[8-11].  
3387

3388 This definition is likely overly stringent. An increasing consensus views all Gleason  
3389 pattern 3 (Gleason score 6) cancers and many Gleason3 plus small amounts of  
3390 pattern 4 cancers as likely insignificant[12]. About half of newly diagnosed prostate  
3391 cancers fall into this category, and are unlikely to progress and affect a man's life  
3392 expectancy if left untreated. The widespread use of PSA testing has led to more men  
3393 being diagnosed with insignificant cancer that does not warrant any treatment [13];  
3394 however they are typically monitored closely with active surveillance. This is  
3395 associated with anxiety about harbouring untreated cancer, and the negative  
3396 psychological effects of being a 'survivor' [14]. Men diagnosed with low risk prostate  
3397 cancer are also subjected to serial biopsies and other tests, requiring long term  
3398 follow up. Further, many men with low risk disease receive radical treatment, either  
3399 because their physicians are not advocates of surveillance or because of anxiety  
3400 [15].These treatments may expose them to morbidity including urinary incontinence  
3401 and erectile dysfunction [16]. Thus, diagnostic tests that clearly differentiate  
3402 clinically significant cancer from clinically insignificant cancer will help reduce patient  
3403 anxiety, alleviate further testing, and avoid radical treatment and associated  
3404 morbidities.

---

### 3406 **6.3 Current standard of care: systematic TRUS guided biopsy**

3407 The European association of Urology and NICE guidelines recommend systematic  
3408 TRUS guided biopsy as the current standard of care for the diagnosis of prostate  
3409 cancer [4, 17]. This procedure has several advantages: it can be delivered quickly in  
3410 an outpatient clinic under local anesthetic, it can be offered at most Urology centres,  
3411 and the expertise is widely distributed.

3412  
3413 Limitations of systematic TRUS guided biopsy are as follows: the procedure requires  
3414 the operator to take 10-12 samples in the peripheral zone, where it is thought that  
3415 the majority of prostate cancer can be found (See Appendix 2)[18]. The ultrasound  
3416 guidance used during the procedure is useful for visualizing the prostate and  
3417 assessing the location of the needle within the prostate but has a poor ability to  
3418 discriminate tumour from normal tissue [19], which means that the systematic TRUS  
3419 guided biopsy can potentially miss some cancer. Systematic TRUS guided biopsy has  
3420 been shown to have a high false negative rate of 30-45% [20, 21]. As a systematic  
3421 TRUS guided biopsy is not specifically targeted to the location of a suspected  
3422 significant cancer, there is also a greater chance that a significant cancer may be  
3423 missed.

### 3424 **6.4 The emerging role of MRI in prostate cancer diagnosis and** 3425 **treatment**

#### 3426 **6.4.1 The role of imaging in prostate cancer diagnosis**

3427 Although used to diagnose many other solid organ cancers such as breast, renal and  
3428 colorectal cancer, imaging is not part of the traditional prostate cancer diagnostic  
3429 pathway. Imaging in prostate cancer, is typically limited to stage the disease  
3430 following histological diagnosis. Magnetic resonance imaging (MRI) is used in many  
3431 centres to assess for extra-capsular extension during prostate cancer staging. In the  
3432 past five years however, the possibility of using multi-parametric MRI (MPMRI) for  
3433 diagnosing prostate cancer prior to biopsy, has generated tremendous interest[22].

#### 3434 **6.4.2 Limitations of early MRI studies in prostate cancer**

3435 Early literature reported conflicting results on the ability of MRI to detect prostate  
3436 cancer. A recent systematic review of the literature showed that the quality of  
3437 studies evaluating MRI was disappointing [22]. Limitations of reported studies  
3438 include:

- 3439 • **Poor reporting standards.** Many early studies failed to closely follow  
3440 published guidelines for the standards of reporting of diagnostic studies  
3441 (STARD) [23].
- 3442 • **Biopsy artifact.** The majority of early studies evaluated MRI after biopsy.  
3443 Evidence has shown that post-biopsy hemorrhage can remain for several  
3444 months and affect interpretation of the image [24].
- 3445 • **Poor reference standards.** Many early studies use systematic TRUS guided  
3446 biopsy as a reference standard, which due to its limitations, can influence the  
3447 validity of the index test of MRI. Using radical prostatectomy specimens as

---

3448 reference standards can lead to a selection bias, as MRI is only validated in  
3449 men with disease characteristics that require radical prostatectomy. Further,  
3450 correlation of radical prostatectomy specimen with an MRI image is not  
3451 without difficulty given the shrinkage (10-20%), distortion, absent perfusion,  
3452 orientation and tissue loss as a result of specimen trimming.

- 3453 • **Incomplete analysis of the prostate.** Many early studies only evaluate the  
3454 validity of MRI in the peripheral zone, even though studies have shown that  
3455 around 25% of prostate cancers may be located in the transition zone [18].
- 3456 • **Segmentation.** Many early studies artificially divide the prostate into a  
3457 number of segments in order to increase the amount of data obtained and  
3458 the power of the analysis. Segments should not be treated as independent  
3459 regions of interest, and this should be factored into the analysis.

3460

### 3461 **6.4.3 Emerging role of MRI in the diagnosis of prostate cancer**

3462 Since the publication of these early reports, improvements in diagnostic technology  
3463 have changed the field and more evidence supporting the role of pre-biopsy MRI has  
3464 been published. Magnetic field strength has increased from 0.5 Tesla to 1.5 Tesla  
3465 and 3.0 Tesla. The introduction of shorter pulse sequences allows faster image  
3466 acquisition and the addition of functional sequences including magnetic resonance  
3467 spectroscopy (MRS), diffusion weighted imaging (DWI) and dynamic contrast  
3468 enhanced imaging (DCE). Clinicians are increasingly aware of and are accounting for  
3469 biopsy artifacts.

3470  
3471 The combination of anatomical sequences (T2-weighted imaging) and functional  
3472 sequences (MRS and/or DWI and/or DCE) is termed multi-parametric MRI.  
3473 Combining the sequences improves the validity of the test [25, 26].

3474  
3475 A systematic review determined that 60% of men with a clinical suspicion of prostate  
3476 cancer will have a suspicious area identified on MRI [27]. In studies correlating MRI  
3477 with radical prostatectomy specimens, MRI demonstrates sensitivity, specificity,  
3478 positive predictive value and negative predictive value of 90%, 88%, 77% and 95%  
3479 respectively for the identification of prostate tumours greater than 0.5ml [28].  
3480 Systematic reviews and meta-analysis of recent studies have demonstrated  
3481 sensitivity and specificity consistently between 70-90% for the detection of clinically  
3482 significant prostate cancer[26, 29-31].

3483  
3484 As a result of this accumulating evidence, MRI is increasingly used in clinical practice  
3485 in the diagnostic pathway for prostate cancer. The results of MRI can influence the  
3486 decision to perform a prostate biopsy, as well as the technique and targeting used  
3487 during the biopsy.

3488  
3489 MRI has tremendous potential to enhance the outcome of men on active  
3490 surveillance. 30% of men diagnosed with low risk prostate cancer (Gleason 6, PSA <  
3491 10) harbor higher-grade disease. This occult high-grade disease "*the wolf in sheep's*  
3492 *clothing*", is responsible for the 3-5% of prostate cancer deaths that have been  
3493 reported in long term surveillance series that did not incorporate MRI[32, 33]. The  
3494 early use of MRI in men on surveillance has the potential both to reduce the need

---

3495 for confirmatory biopsies, and to identify the *wolf in sheep's clothing* earlier, prior to  
3496 the development of metastasis.

3497

3498 This was the rationale for the very successful ASIST study, which recently successfully  
3499 completed its accrual. The ASIST study was led by Dr. Klotz (PI), and sponsored *in*  
3500 *toto* by the Ontario Institute of Cancer Research. The project was managed by the  
3501 Canadian Urology Research Consortium (CURC). It randomized 273 men recently  
3502 diagnosed with low risk prostate cancer, on surveillance, between systematic  
3503 confirmatory biopsy and MRI with targeted and systematic biopsy. The primary end  
3504 point, similar to PRECISE, was the proportion of men in each group with Gleason 7 or  
3505 higher prostate cancer. The study had numerous secondary end points and  
3506 correlative science components. We expect to report the initial results by 3Q  
3507 2016. We believe that the success and potential impact of the ASIST trial has created  
3508 strong momentum to proceed with the PRECISE trial, which has even greater  
3509 potential to substantially influence prostate cancer screening and diagnosis.

#### 3510 **6.4.3.1 MRI can influence the decision to perform a prostate biopsy**

3511 With reported negative predictive values of 95% [28, 34,35], MRI can help determine  
3512 whether a prostate biopsy is necessary; if the MRI does not identify a suspicious area  
3513 the biopsy can be avoided. Using MRI, 40-50% of men referred with clinical suspicion  
3514 of prostate cancer might avoid a biopsy [27]. The recent National Institute for Health  
3515 Research (NIHR) Health Technology Assessment (HTA) report [11] acknowledged the  
3516 value of MRI in this context. The NIHR HTA report suggests that using MRI to reduce  
3517 the number of men who undergo biopsy, can be cost effective despite the costs  
3518 associated with MRI[11]. Cost savings for the publically funded health care system  
3519 accrue as a result of reduced number of biopsies and costs of attendant  
3520 complications, and reduced treatment of clinically insignificant cancer.

#### 3521 **6.4.3.2 MRI can influence the biopsy technique**

3522 For men who receive a MRI scan and then go on to biopsy of the prostate, the MRI  
3523 information is used to influence the prostate biopsy technique. This is known as MRI-  
3524 targeted biopsy (MRI-TB) of the prostate, and can be carried out in a number of  
3525 ways.

3526

3527 The biopsy operator can use the MRI images or report to direct biopsies into the  
3528 area of the prostate where the tumour is located. The location of the tumour on the  
3529 MRI (carried out in advance) is registered to the real-time ultrasound images with  
3530 the use of software (software assisted registration or image-fusion) or without the  
3531 use of software (visual registration or cognitive registration), while the prostate is  
3532 visualized in real-time using trans rectal ultrasound. MRI-TB can also be conducted  
3533 directly "in-bore", where the biopsy is conducted within an MRI scanner where the  
3534 target identified on MRI during a prior diagnostic scan is biopsied using guidance  
3535 from serial MRI scans during the biopsy procedure, performed in an open magnet.

3536

3537 For the PRECISE study, the biopsy will be performed using an image fusion-targeting  
3538 device. Two devices have been FDA approved: the Artemis, made by Eigen, and the  
3539 Urostation, made by Koelis. These devices import the MR target into the TRUS  
3540 image, and direct the biopsy needle into the target.

---

3541 **6.4.4 Prostate cancer detection rates of MRI-targeted biopsy are**  
3542 **similar to other methods**

3543 A systematic review determined that 60% of men with a clinical suspicion of prostate  
3544 cancer will have a suspicious area identified on MRI [27]. One study found that a  
3545 prostate biopsy strategy using only MPMRI-targeted cores resulted in the same  
3546 detection rate of clinically significant cancer as 20-sector transperineal biopsies[36].  
3547 Other studies also show that a targeted-alone approach would detect a similar  
3548 amount of clinically significant cancer when compared to a 10-12 core systematic  
3549 TRUS guided biopsy[37]. A targeted-alone approach detects 17% less clinically  
3550 insignificant cancer compared to systematic TRUS guided biopsy[38].

3551  
3552 The detection rates achieved with a targeted-alone biopsy strategy require fewer  
3553 biopsy cores than systematic TRUS guided biopsy. Thus on a per-core analysis,  
3554 targeted biopsy is more efficient than systematic TRUS guided biopsy, with cancer  
3555 detected in 30% of all targeted cores in a pooled analysis of 1252 targeted cores  
3556 compared to 7% of all systematic TRUS guided biopsy cores in a pooled analysis of  
3557 5441 systematic cores [27]. As well, the MRI targeted biopsy provides more material  
3558 for histopathological analysis as the maximum cancer core length obtained from  
3559 targeted biopsies can be greater than that obtained from systematic biopsies[37].

3560  
3561 Robust comparative evidence from randomized controlled trials is needed to  
3562 determine if MRI scans can improve our ability over systematic TRUS guided biopsy  
3563 to diagnose clinically significant cancer and our ability to avoid detecting clinically  
3564 insignificant cancer.

3565

3566 **6.4.5 Limitations of studies reporting MPMRI-targeted prostate biopsy**

3567 Despite encouraging results of MRI-targeted biopsy, it is not yet part of routine  
3568 clinical practice for prostate cancer diagnosis. Most existing studies have cohort  
3569 study designs which make interpretation difficult as they do not conform well to  
3570 STARD [23] recommendations [27]. Limitations of these studies include:

- 3571 • **Broad definition of the study population.** The cancer detection rates depend on  
3572 the prevalence of the condition in the population being investigated. This varies  
3573 amongst men with no prior biopsy, prior negative biopsy and prior positive  
3574 biopsy. In many studies the detection rates are not attributable to a clearly  
3575 defined population.
- 3576 • **MRI conduct and reporting.** The detail in which MRI is conducted and  
3577 interpreted varies greatly amongst published studies.
- 3578 • **Reporting of cancer detection.** The cancer detection by systematic and targeted  
3579 cores is not always presented separately and cancer detection is not always  
3580 specified by clinical significance. These are both essential in order to evaluate the  
3581 technique.

3582 There is a strong need for a randomized controlled trial comparing MRI-targeted  
3583 biopsy to systematic TRUS guided biopsy so that the role of this technique in clinical  
3584 practice can be established.

---

## 3585 **6.5 Novelty of PRECISE**

3586 PRECISE is the first randomized study in biopsy-naïve men in which men are  
3587 randomized to an MRI targeted-alone biopsy arm (i.e. no biopsies of MR-normal  
3588 areas of prostate and no biopsy at all if the MR is non-suspicious) or a systematic  
3589 TRUS guided biopsy arm. This will allow evaluation of the efficacy of the MRI-  
3590 targeted biopsy approach in the detection of clinically significant cancer. In order to  
3591 evaluate a biopsy technique that could replace standard of care, the standard of care  
3592 test, i.e. systematic TRUS guided biopsy, must be included in one of the arms to  
3593 allow a direct comparison.

3594

3595 Other constituencies with an interest in MRI in prostate cancer (University College,  
3596 London; Lille, France; Oslo, Norway; Heidelberg, Germany; New York University, New  
3597 York) have considered similar studies, however in these centres MRI has largely  
3598 replaced systematic TRUS guided biopsy, notwithstanding the lack of evidence to  
3599 date. As a result, these centres have acknowledged that randomization to a standard  
3600 biopsy arm (ie systematic TRUS guided biopsy) would no longer be feasible as  
3601 equipoise has been lost.

3602

3603 In Ontario, and in almost all other Canadian provinces, prostate MPMRI is not  
3604 recommended for the indication of an elevated PSA in men who have not had a  
3605 biopsy. In this country, men at risk for prostate cancer, in almost all cases, proceed  
3606 to a TRUS guided systematic biopsy. We believe that the opportunity to avoid a  
3607 biopsy will make entry into this trial very appealing to potential candidates. Further,  
3608 the barriers, both financial and physical, to obtaining a quality MRI outside of the  
3609 health care system are substantial. Thus we believe men who are randomized to the  
3610 systemic biopsy arm will in almost all cases proceed with biopsy avoiding significant  
3611 contamination (i.e. men randomized to the systematic biopsy arm seeking out an  
3612 MRI instead).

3613

## 3614 **7. Trial objectives**

### 3615 **7.1 Overall aim**

3616 The aim of this study is to assess the efficacy of MRI-targeted biopsy compared to  
3617 standard of care systematic TRUS guided biopsy in the detection of clinically  
3618 significant and clinically insignificant prostate cancer in men without prior biopsy.  
3619 The implication of this trial is that MRI-targeted biopsy could replace systematic  
3620 TRUS guided biopsy as the standard of care in the diagnosis of prostate cancer.

### 3621 **7.2 Hypotheses**

3622 The proportion of men with clinically significant cancer detected by MRI-targeted  
3623 biopsy will be no less than that detected by systematic TRUS guided biopsy.

### 3624 **7.3 Primary Objective**

3625 To determine whether the proportion of men with clinically significant cancer  
3626 (Gleason  $\geq$  7) detected by MRI-targeted biopsy is no less than systematic TRUS  
3627 guided biopsy.



---

## 3628 **7.4 Secondary Objectives**

- 3629 27. To determine whether the proportion of men with clinically significant cancer  
3630 (Gleason  $\geq 7$ ) detected by MRI-targeted biopsy is greater than systematic TRUS  
3631 guided biopsy.
- 3632 28. Proportion of men in each arm with clinically insignificant cancer detected.
- 3633 29. Proportion of men in each arm with Gleason  $\geq 4+3$  detected.
- 3634 30. Proportion of men in MRI arm who avoid biopsy.
- 3635 31. Proportion of men in the MRI arm whom the PI-RADS score for suspicion of  
3636 clinically significant cancer was 3, 4 or 5 but no clinically significant cancer was  
3637 detected.
- 3638 32. Proportion of men in each arm who go on to definitive local treatment (e.g.  
3639 radical prostatectomy, radiotherapy, brachytherapy) or systemic treatment (e.g.  
3640 hormone therapy, chemotherapy).
- 3641 33. Proportion of men with a negative MRI who develop a positive MRI and/ or  
3642 Gleason  $\geq 7$  cancer by 2 years.
- 3643 34. Proportion of men with post-biopsy adverse events
- 3644 35. Health-related quality of life scores.
- 3645 36. Proportion with Gleason grade upgrading in men undergoing radical  
3646 prostatectomy.
- 3647 37. To determine the cost per diagnosis of cancer.
- 3648 38. To determine the impact of the addition of Gd based contrast compared to a non  
3649 contrast abbreviated MRI protocol on target yield
- 3650 39. To determine if a radiologist Likert score not based on Pi-Rads has a better target  
3651 yield than Pi\_Rads alone
- 3652
- 3653

## 3654 **7.5 Explanation for non-inferiority hypothesis**

3655 Due to the putative advantages of MRI-TB in reducing the number of men who  
3656 require a biopsy, reducing the number of cores required in each man who is  
3657 biopsied, more accurate representation of disease burden, less insignificant disease  
3658 detected and reducing the number of men at risk of complications of biopsy, the  
3659 primary outcome of detection of clinically significant cancer in each arm will be  
3660 compared using a non-inferiority hypothesis. Even if a similar amount of clinically  
3661 significant cancer is identified by MRI-TB to systematic TRUS guided biopsy, these  
3662 advantages would support the use of MRI-TB instead of systematic TRUS guided  
3663 biopsy in clinical practice.

3664

## 3665 **7.6 Anticipated timeline of study progression**

3666 The study will commence once sponsorship, ethical approval and local approvals  
3667 have been obtained at a participating site and once site initiation training has  
3668 occurred and a letter of site activation has been issued from the coordinating centre.  
3669 Additional sites may join after the study has commenced. At this time, five sites will  
3670 participate. Assuming a minimum recruitment rate of 3-6 men per site per month,  
3671 recruitment will be complete by 24 months, if not sooner. If accrual is slower than  
3672 expected, an additional 1-2 sites will be recruited for year 2.

3673

---

| Month | Number of Sites | Total recruitment |
|-------|-----------------|-------------------|
| 0     | 2               | 0                 |
| 3     | 4               | 18-36             |
| 6     | 5               | 54-108            |
| 9     | 5               | 99-198            |
| 12    | 5               | 144-288           |
| 15    | 5               | 189-378           |
| 18    | 5               | 234-468           |
| 21    | 5               | 279-558           |
| 24    | 5               | 324-648           |

3674

3675 **8.Study Population**

3676 **8.1 Number of Subjects**

3677 Approximately 450 men with a clinical suspicion of prostate cancer, based on PSA or  
3678 results of digital rectal exam, with no prior biopsy will be eligible for participation.  
3679 Subjects must satisfy all inclusion and exclusion criteria. A sufficient number will be  
3680 enrolled (estimate: 450) to achieve at least 211 completed subjects per arm.

3681 **8.2 Subject inclusion criteria**

3682 In order to be eligible, all inclusion criteria must be met:

- 3683 7. Men at least 18 years of age referred with clinical suspicion of prostate cancer  
3684 who have been advised to have a prostate biopsy;
- 3685 8.  $\geq 5\%$  chance of high-grade prostate cancer as calculated using individualized risk  
3686 assessment of prostate cancer calculator, PCPTRC 2.0, found at  
3687 <http://deb.uthscsa.edu/URORiskCalc/Pages/calcs.jsp> For men under age 55,  
3688 the default age of 55 should be entered on the risk calculator.
- 3689 9. Serum PSA  $\leq 20$ ng/ml within 3 months of randomization
- 3690 10. Fit to undergo all procedures listed in protocol;
- 3691 11. Able to provide written informed consent.

3692 **8.3 Subject exclusion criteria**

3693 Men who meet the following criteria at the time of screening will be excluded:

- 3694 7. Prior prostate biopsy
- 3695 8. Prior treatment for prostate cancer
- 3696 9. Contraindication to MRI (e.g. claustrophobia, pacemaker, estimated GFR  
3697  $\leq 50$ mls/min)
- 3698 10. Contraindication to prostate biopsy
- 3699 11. Men in whom artifact would reduce the quality of the MRI, i.e. previous hip  
3700 replacement surgery, metallic hip replacement or extensive pelvic orthopaedic  
3701 metal work
- 3702 12. Unfit to undergo any procedures listed in protocol.
- 3703

---

3704 **9. Study design**

3705 **9.1 Study design**

3706 The study is a multi-centre, open-label randomized controlled trial, with men  
3707 randomized in a 1:1 ratio to one of two arms (see Trial Schema, section 9.2). Men in  
3708 Arm A will undergo a MRI followed by either a targeted biopsy of suspicious areas or  
3709 will be followed for two years if there is no suspicious areas identified by MRI. The  
3710 unbiopsied men will have a repeat MRI at 2 years. Men in Arm B will undergo a 12-  
3711 core systematic TRUS guided biopsy. All men in the study will be followed for two  
3712 years or until they have had radical treatment (whichever comes first).  
3713

3714  
3715  
3716

## 9.2 Study Trial Schema

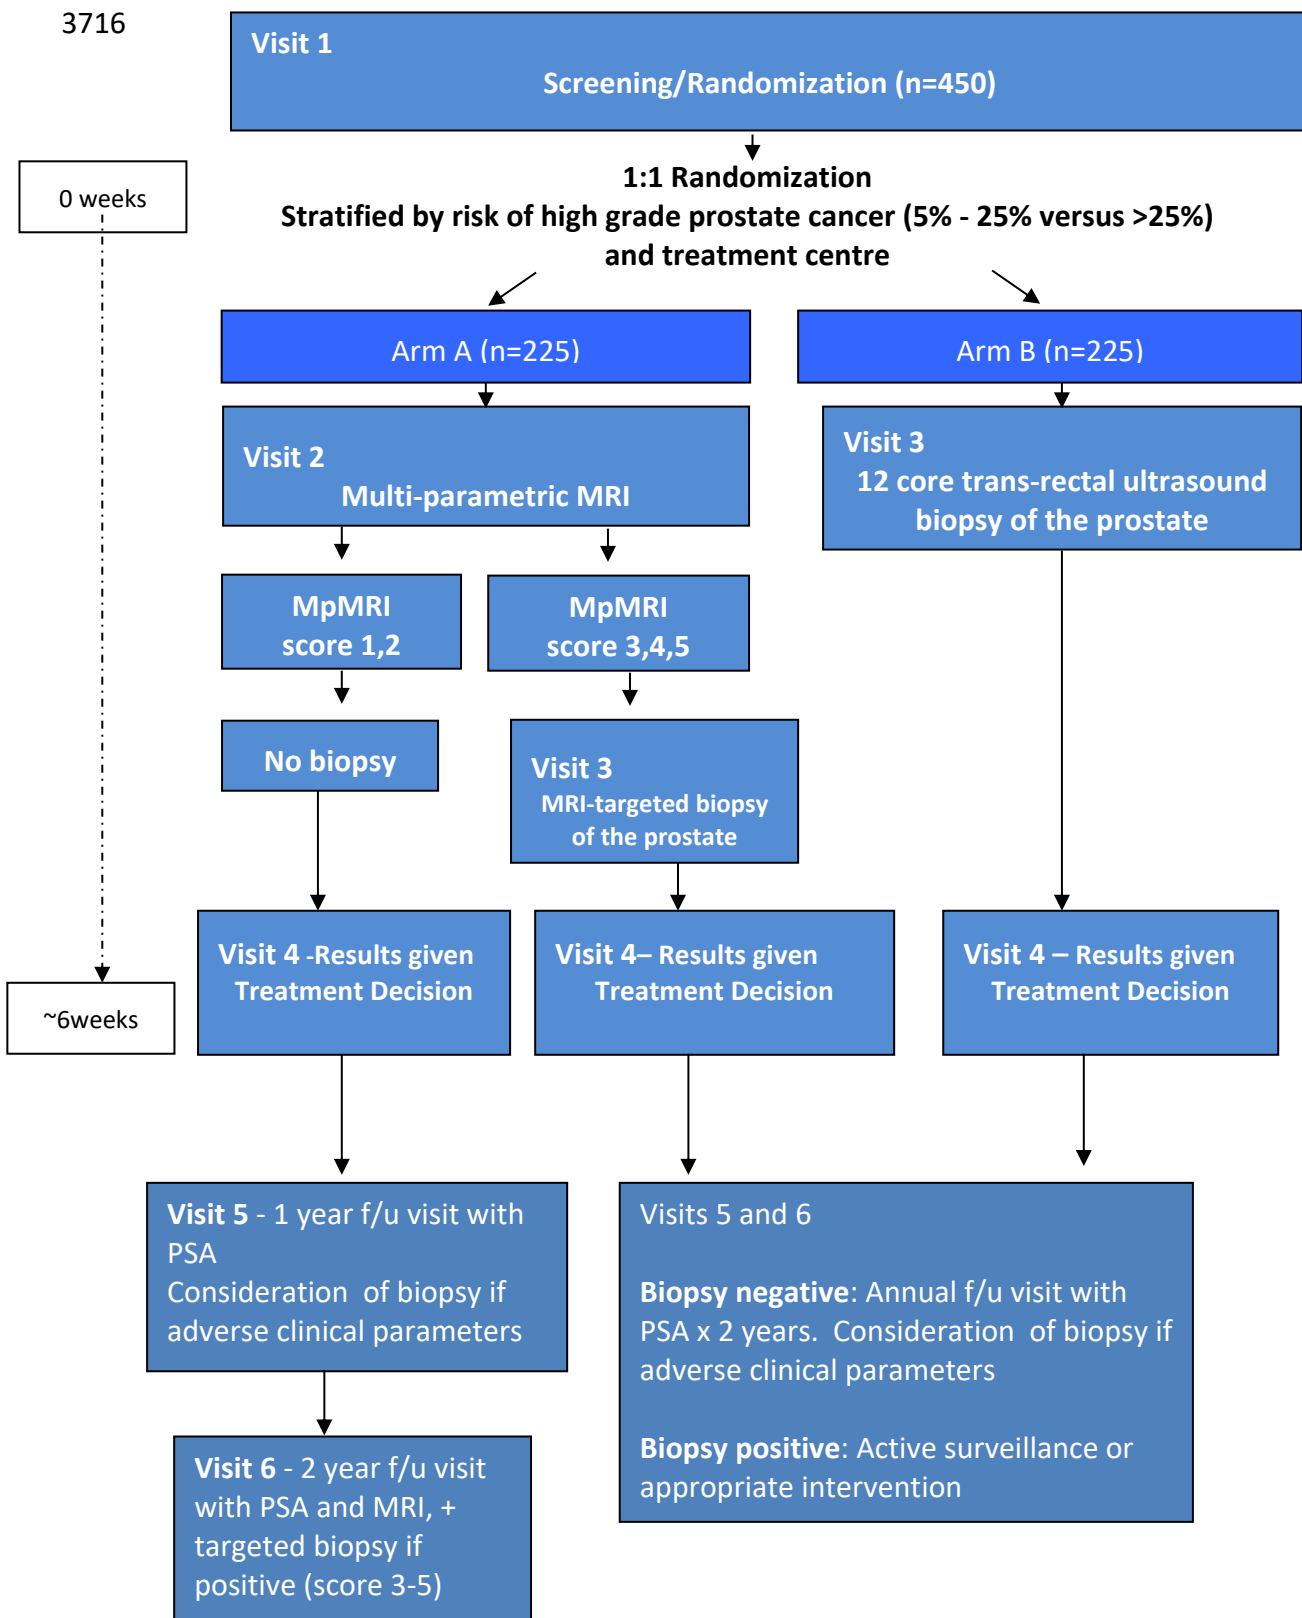

3717 **9.3 Timeline of subject contact**

3718 Tables 1, 2 and 3 illustrate the three individual subject pathways possible in the trial.

3719 The individual pathway that each subject experiences is dependent on both the arm  
3720 he is randomized to and results of the tests.

3721

3722 **Table 1: ARM A: Men randomized to MRI arm who have a normal MRI and do not require**  
3723 **a biopsy**

|                                              | Visit 1<br>Screening/<br>Randomization                  | Visit<br>2<br>MRI | Visit<br>3<br>N/A | Visit 4<br>Post-<br>Test | Visit 5<br>6 mos | Visit 6<br>1 year<br>follow<br>up | Visit 7<br>18<br>mos | Visit 8<br>2 year<br>follow<br>up |
|----------------------------------------------|---------------------------------------------------------|-------------------|-------------------|--------------------------|------------------|-----------------------------------|----------------------|-----------------------------------|
| <b>Weeks:</b>                                | 0                                                       | 1                 | 2                 | 5                        | 26               | 52                                | 78                   | 104                               |
| Consent                                      | X                                                       |                   |                   |                          |                  |                                   |                      |                                   |
| Screening<br>(eligibility review,<br>med hx, | X                                                       |                   |                   |                          |                  |                                   |                      |                                   |
| Vitals, DRE <sup>1</sup>                     | X                                                       |                   |                   |                          | X                | X                                 | X                    | X                                 |
| Randomization                                | X                                                       |                   |                   |                          |                  |                                   |                      |                                   |
| EQ-5D-5L                                     | X                                                       |                   |                   | X                        |                  |                                   |                      | X                                 |
| Correlative<br>sample collection:<br>• blood | X                                                       |                   |                   |                          | X                | X                                 | X                    | X                                 |
| • urine <sup>2</sup>                         | X                                                       |                   |                   |                          | X                | X                                 | X                    | X                                 |
| • semen <sup>3</sup>                         | X                                                       |                   |                   |                          |                  | X                                 |                      | X                                 |
| • tissue-<br>NA                              |                                                         |                   |                   |                          |                  |                                   |                      |                                   |
| Creatinine                                   | X                                                       |                   |                   |                          |                  |                                   |                      |                                   |
| PSA <sup>4</sup>                             | X                                                       |                   |                   |                          | X                | X                                 | X                    | X                                 |
| Systematic TRUS<br>guided biopsy             |                                                         |                   |                   |                          |                  |                                   |                      |                                   |
| MRI                                          |                                                         | X                 |                   |                          |                  |                                   |                      | X <sup>5</sup>                    |
| MRI-Targeted<br>Biopsy                       |                                                         |                   |                   |                          |                  |                                   |                      | X if<br>target                    |
| Immediate post-<br>biopsy<br>questionnaire   |                                                         |                   |                   |                          |                  |                                   |                      |                                   |
| Follow up for<br>results of tests            |                                                         |                   |                   | X                        |                  |                                   |                      |                                   |
| Treatment<br>decision <sup>6</sup>           |                                                         |                   |                   | X                        |                  |                                   |                      |                                   |
| 30-day post-<br>biopsy<br>questionnaire      |                                                         |                   |                   |                          |                  |                                   |                      |                                   |
| AE/SAE                                       | Complete as required at any time following registration |                   |                   |                          |                  |                                   |                      |                                   |
| Withdrawal Form                              | Complete as required at any time following registration |                   |                   |                          |                  |                                   |                      |                                   |
| ConMeds Form                                 | Complete as required at any time following registration |                   |                   |                          |                  |                                   |                      |                                   |

---

3724 <sup>1</sup>Urine sample will be required PRE and POST DRE, if subject has agreed to the Correlative  
3725 Science component. See correlative manual for instruction.  
3726 <sup>2</sup>Urine samples will be collected at select visits, this may include 2 samples, 'Random-First  
3727 catch' and post-DRE samples. See the Correlative Science Manual for further details on  
3728 collection and processing.  
3729 <sup>3</sup>Collected at baseline, and annually.  
3730 <sup>4</sup>PSA will have been done prior to visit 1 as part of screening.  
3731 <sup>5</sup> If MRI indicates a target, biopsy must be done  
3732 <sup>6</sup>After treatment decision men revert to standard of care.  
3733

3734  
3735

**Table 2: ARM A: Men randomized to MRI arm who have a lesion on MRI and require a biopsy**

|                                                 | Visit 1<br>Screening<br>/<br>Randomization                 | Visit<br>2<br>MRI | Visit 3<br>Biopsy | Visit 4<br>Post-<br>test | Visit 5<br>6 mos | Visit 6<br>1 year<br>follow<br>up | Visit<br>7<br>18<br>mos | Visit 8<br>2 year<br>follo<br>w up |
|-------------------------------------------------|------------------------------------------------------------|-------------------|-------------------|--------------------------|------------------|-----------------------------------|-------------------------|------------------------------------|
| <b>Weeks:</b>                                   | 0                                                          | 1                 | 2                 | 6                        | 26               | 52                                | 78                      | 104                                |
| Consent                                         | X                                                          |                   |                   |                          |                  |                                   |                         |                                    |
| Screening<br>(eligibility<br>review, med hx)    | X                                                          |                   |                   |                          |                  |                                   |                         |                                    |
| Vitals, DRE <sup>1</sup>                        | X                                                          |                   |                   |                          | X                | X                                 | X                       | X                                  |
| Randomization                                   | X                                                          |                   |                   |                          |                  |                                   |                         |                                    |
| EQ-5D-5L                                        | X                                                          |                   |                   | X                        |                  |                                   |                         | X                                  |
| Correlative<br>sample<br>collection:<br>• blood | X                                                          |                   |                   |                          | X                | X                                 | X                       | X                                  |
| • urine <sup>2</sup>                            | X                                                          |                   |                   |                          | X                | X                                 | X                       | X                                  |
| • semen <sup>3</sup>                            | X                                                          |                   |                   |                          |                  | X                                 |                         | X                                  |
| • tissue <sup>4</sup>                           |                                                            |                   | X                 |                          |                  |                                   |                         | X                                  |
| Creatinine                                      | X                                                          |                   |                   |                          |                  |                                   |                         |                                    |
| PSA <sup>5</sup>                                | X                                                          |                   |                   |                          | X                | X                                 | X                       | X                                  |
| Systematic<br>TRUS guided<br>biopsy             |                                                            |                   |                   |                          |                  |                                   |                         |                                    |
| MRI <sup>6</sup>                                |                                                            | X                 |                   |                          |                  |                                   |                         |                                    |
| MRI-Targeted<br>Biopsy                          |                                                            |                   | X                 |                          |                  |                                   |                         |                                    |
| Immediate post-<br>biopsy<br>questionnaire      |                                                            |                   | X                 |                          |                  |                                   |                         |                                    |
| Follow up for<br>results of tests               |                                                            |                   |                   | X                        |                  |                                   |                         |                                    |
| Treatment<br>decision <sup>7</sup>              |                                                            |                   |                   | X                        |                  |                                   |                         |                                    |
| 30-day post-<br>biopsy<br>questionnaire         |                                                            |                   |                   | X                        |                  |                                   |                         |                                    |
| AE/SAE                                          | Complete as required at any time following<br>registration |                   |                   |                          |                  |                                   |                         |                                    |
| Withdrawal<br>Form                              | Complete as required at any time following<br>registration |                   |                   |                          |                  |                                   |                         |                                    |
| ConMeds From                                    | Complete as required at any time following<br>registration |                   |                   |                          |                  |                                   |                         |                                    |

3736  
3737  
3738  
3739  
3740  
3741  
3742  
3743  
3744  
3745  
3746  
3747  
3748  
3749  
3750  
3751  
3752  
3753  
3754  
3755  
3756  
3757  
3758  
3759  
3760  
3761  
3762  
3763  
3764  
3765  
3766  
3767  
3768  
3769  
3770  
3771  
3772  
3773  
3774  
3775  
3776  
3777  
3778  
3779  
3780  
3781  
3782  
3783  
3784  
3785  
3786

---

<sup>1</sup>Urine sample will be required PRE and POST DRE, if subject has agreed to the Correlative Science component. See correlative manual for instruction.

<sup>2</sup>Urine samples will be collected at select visits, this may include 2 samples, 'Random-First catch' and post-DRE samples. See the Correlative Science Manual for further details on collection and processing.

<sup>3</sup>Collected at baseline, and annually.

<sup>4</sup> tissue should be obtained if subject has agreed to the Correlative Science component. See correlative manual for instruction.

<sup>5</sup>PSA will have been done prior to visit 1 as part of screening.

<sup>6</sup> If MRI indicates a target, biopsy must be done, and tissue obtained if subject has agreed to the Correlative Science component. See correlative manual for instruction.<sup>7</sup>After treatment decision men revert to standard of care.



**Table 3: ARM B: Men randomized to systematic TRUS guided biopsy arm**

|                                                 | Visit 1<br>Screening/<br>Randomization                  | Visit<br>2 | Visit 3<br>Biopsy | Visit 4<br>Post-<br>test<br>visit | Visit 5<br>6 mos | Visit<br>6<br>1<br>year<br>follo<br>w up | Visit 7<br>18<br>mos | Visit 8<br>2 year<br>follow<br>up |
|-------------------------------------------------|---------------------------------------------------------|------------|-------------------|-----------------------------------|------------------|------------------------------------------|----------------------|-----------------------------------|
| <b>Weeks:</b>                                   | 0                                                       | 1          | 2                 | 6                                 | 26               | 52                                       | 52                   | 104                               |
| Consent                                         | X                                                       |            |                   |                                   |                  |                                          |                      |                                   |
| Screening<br>(eligibility review,<br>med hx)    | X                                                       |            |                   |                                   |                  |                                          |                      |                                   |
| Vitals, DRE <sup>1</sup>                        |                                                         |            |                   |                                   |                  |                                          |                      |                                   |
| Randomization                                   | X                                                       |            |                   |                                   |                  |                                          |                      |                                   |
| EQ-5D-5L                                        | X                                                       |            |                   | X                                 |                  |                                          |                      | X                                 |
| Correlative<br>sample<br>collection:<br>• blood | X                                                       |            |                   |                                   | X                | X                                        | X                    | X                                 |
| • urine <sup>2</sup>                            | X                                                       |            |                   |                                   | X                | X                                        | X                    | X                                 |
| • semen <sup>3</sup>                            | X                                                       |            |                   |                                   |                  | X                                        |                      | X                                 |
| • tissue                                        |                                                         |            | X                 |                                   |                  |                                          |                      |                                   |
| Creatinine                                      | X                                                       |            |                   |                                   |                  |                                          |                      |                                   |
| PSA                                             | X                                                       |            |                   |                                   | X                | X                                        | X                    | X                                 |
| Systematic TRUS<br>guided biopsy                |                                                         |            | X                 |                                   |                  |                                          |                      |                                   |
| MRI                                             |                                                         |            |                   |                                   |                  |                                          |                      |                                   |
| MRI-Targeted<br>Biopsy                          |                                                         |            |                   |                                   |                  |                                          |                      |                                   |
| Immediate post-<br>biopsy<br>questionnaire      |                                                         |            | X                 |                                   |                  |                                          |                      |                                   |
| Follow up for<br>results of tests               |                                                         |            |                   | X                                 |                  |                                          |                      |                                   |
| Treatment<br>decision <sup>4</sup>              |                                                         |            |                   | X                                 |                  |                                          |                      |                                   |
| 30-day post-<br>biopsy<br>questionnaire         |                                                         |            |                   | X                                 |                  |                                          |                      |                                   |
| AE/SAE                                          | Complete as required at any time following registration |            |                   |                                   |                  |                                          |                      |                                   |
| Withdrawal Form                                 | Complete as required at any time following registration |            |                   |                                   |                  |                                          |                      |                                   |
| ConMeds Form                                    | Complete as required at any time following registration |            |                   |                                   |                  |                                          |                      |                                   |

---

3788 <sup>1</sup>Urine sample will be required PRE and POST DRE, if subject has agreed to the Correlative  
3789 Science component. See correlative manual for instruction.  
3790 <sup>2</sup>Urine samples will be collected at select visits, this may include 2 samples, 'Random-First  
3791 catch' and post-DRE samples. See the Correlative Science Manual for further details on  
3792 collection and processing.  
3793 <sup>3</sup>Collected at baseline, and annually.  
3794 <sup>4</sup>PSA will have been done prior to visit 1 as part of screening.  
3795 <sup>5</sup>If MRI indicates a target, biopsy must be done, and tissue must be obtained if subject has  
3796 agreed to the Correlative Science component. See correlative manual for instruction.<sup>6</sup>After  
3797 treatment decision men revert to standard of care.  
3798  
3799

## 3800 **10. Trial Interventions and procedures**

3801  
3802 The following procedures will be applied as necessary to subjects enrolled in both  
3803 arm of the trial.

### 3804 **10.1 EQ-5D-5L Questionnaires**

3805

#### 3806 **For all subjects enrolled in trial**

3807 Once enrolled into the study, all men will be asked to fill out an EQ-5D-5L  
3808 questionnaire (Appendix 4), which is a validated 2-page questionnaire which aims to  
3809 evaluate health related quality of life. It takes approximately 2 minutes to complete.

- 3810 • All subjects should complete the baseline questionnaire at the screening visit  
3811 before leaving the department.
- 3812 • Subjects will be given the questionnaire before they leave the department and  
3813 the subject should take this home. Subjects can return the completed  
3814 questionnaire to the investigator by post in a pre-addressed envelope provided  
3815 by the investigator. It cannot be filled out immediately after the procedure in the  
3816 department as it assesses domains such as washing, dressing and carrying out  
3817 usual activities, which cannot be established immediately after the biopsy.  
3818 Subjects will be reminded by the biopsy operator to complete the questionnaire  
3819 at home and may be given a phone call by the research team to remind them to  
3820 complete the questionnaire.
- 3821 • Subjects undergoing MRI-targeted biopsy or a systematic TRUS guided biopsy will  
3822 be given an EQ-5D-5L questionnaire to fill out at 30 days post biopsy. The date  
3823 that the subject should fill out the questionnaires should be written on top of the  
3824 questionnaire. (This can also be done at Visit 4).
- 3825 • All subjects should complete the EQ-5D-5L questionnaire at the 2 year follow up  
3826 visit.

3827

3828

3829

3830

3831

3832

---

3833 **10.2 Multiparametric MRI imaging procedure**

3834 **For subjects in Arm A only**

3835

3836 **10.2.1 MRI Protocol**

3837 A non-endorectal coil MRI will be carried out in 3.0 Tesla scanner with a pelvic  
3838 phased array coil and an automated injector system with the subject in the supine  
3839 position. T2-weighted (T2W), diffusion weighted (DWI) and dynamic contrast  
3840 enhanced (DCE) scans will be acquired as per the requirements set out by PI-RADS  
3841 v2.

3842

3843 Within the specified PiRads-2 framework a common protocol will be formulated by a  
3844 consensus of the radiologists involved in the trial at each site at a startup meeting.  
3845 The highest agreed upon b-value image for DWI (at least 1400s/mm<sup>2</sup>) will be  
3846 selected for all sites to ensure consistency. Similarly, the spatial resolution, contrast  
3847 media, injection rates and dynamic scanning temporal resolution will be matched for  
3848 all sites. An optional multi b value DWI acquisition will be undertaken as well to  
3849 allow for ancillary studies into non log linear apparent diffusion coefficient (ADC)  
3850 models for tumor characterization. This is summarized in an MRI Operations Manual

3851

3852

3853 Subjects will be asked to follow their local standard of care MRI examination  
3854 preparation instructions for the MRI procedure.

3855 **10.2.2 MRI reporting**

3856 The MRI will be reported by an experienced radiologist using the MRI Reporting  
3857 Proforma(See Appendix 2) to be filed in the study folder. The MPMRI will be scored  
3858 based on the PI-RADS v2 scoring system [2]. Radiologists will also provide a 5  
3859 point Likert score for purposes of comparison. . Biopsy decisions will be based on the  
3860 PiRads scores.

3861

3862

3863 Lesions in the prostate will be scored on the following scale:

3864 PI-RADS 1 – Very low (clinically significant cancer is highly unlikely to be  
3865 present)

3866 PI-RADS 2 – Low (clinically significant cancer is unlikely to be present)

3867 PI-RADS 3 – Intermediate (the presence of clinically significant cancer is  
3868 equivocal)

3869 PI-RADS 4 – High (clinically significant cancer is likely to be present)

3870 PI-RADS 5 – Very high (clinically significant cancer is highly likely to be  
3871 present)

3872

3873 The location of the suspicious areas in the prostate should be marked on a diagram  
3874 of the prostate (see Appendix2) and the sector numbers containing each suspicious  
3875 area should be recorded in the case report form.

3876

3877 Radiologists will be blinded to the PSA.

---

3878

3879

3880 Imaging interpretation will be carried out at each site, however ensuring consistency  
3881 and quality of imaging interpretation is crucial. A central imaging site will be  
3882 designated with a lead radiologist (Sunnybrook, MH). A single radiologist at each site  
3883 will perform the interpretation of all images for that site. The designated radiologist  
3884 must have experience of interpreting at least 200 MRI's using PI-RADS 1 or 2.A  
3885 startup meeting involving all radiologists will be held prior to start of accrual where  
3886 each site will bring 5 MRI cases performed at their site for consensus review, scoring  
3887 and discussion. This will provide a commonality of approach to interpretation among  
3888 the radiologists before the study begins. After this startup meeting each site will  
3889 send one set of MRI images and its interpretation for central review for site  
3890 qualification.

3891

3892 A copy of all images will be sent on CD/DVD to the central site for archiving.

### 3893 **10.3 No target identified on MPMRI (PiRads 1 or 2)**

#### 3894 **For subjects in Arm A only, who do not require a biopsy**

3895 Men who have MRIs that do not identify any suspicious lesion will not receive a  
3896 biopsy. These subjects will benefit from being part of the trial as a result of not  
3897 having to undergo an invasive biopsy procedure, avoiding the discomfort associated  
3898 with the procedure, the risk of being diagnosed with clinically insignificant cancer  
3899 and the risk of sepsis associated with the biopsy procedure. Studies suggest that if  
3900 the MRI does not identify areas suspicious for cancer there is an 85-95% chance that  
3901 clinically significant cancer is not present[28, 34, 35].

3902

3903 As soon as the results of the MRI are discussed with the subject, their treatment  
3904 decision will be recorded and they will return to standard of care management. As  
3905 part of standard of care these subjects can undergo further PSA surveillance and / or  
3906 prostate biopsies if indicated.

### 3907 **10.4 MRI-Targeted biopsy**

#### 3908 **For subjects in Arm A who do require a biopsy**

#### 3909 **10.4.1 MRI choice of targets for targeted biopsy**

3910 Men whose prostates contain a suspicious area with a PI-RADS score of 3,4 or 5 will  
3911 subsequently undergo targeted biopsy by a Urologist or Radiologist experienced in  
3912 MRI-targeted biopsy. Operator experience (number of targeted biopsies performed  
3913 to date) will be recorded before each procedure. The number of biopsy operators  
3914 should be kept to the minimum number possible.

3915

3916 Targets will be stratified by PI-RADS score and if the same score then by size and  
3917 labeled T1, T2, T3...etc. If there are more than 3 lesions with a score of 3 or more  
3918 only T1-T3 will be targeted. The radiologist should record the sectors involved with  
3919 tumor in order of most to least involved using the PI-RADS v2 sector scheme.

3920 The number of biopsy operators should be kept to the minimum number possible.

3921

---

3922 Subjects in the MRI cohort will not have systematic biopsies, with one exception.  
3923 Those whose MRI is grade 3M (a multifocal pattern suggesting multifocal small  
3924 volume cancer, with PSA Density >0.15 and no focal lesion), a systematic 12 core  
3925 biopsy will be conducted.

#### 3926 **10.4.2 MRI Biopsy**

3927 The procedure will be performed in the outpatient departments of sites possessing  
3928 the required equipment by a clinician competent in TRUS/MRI-targeted biopsy. An  
3929 operator must have performed at least 50 targeted biopsy cases on the TRUS/MRI  
3930 fusion system at their institution before they are qualified to participate as an  
3931 operator in the study.

3932  
3933 Coumarin anticoagulant, clopidogrel treatment and other relevant  
3934 anticoagulants/antiplatelets will be discontinued up to 10 days before biopsy and  
3935 advice sought as to appropriate substitutes if indicated. Aspirin will be continued at  
3936 the discretion of the physician doing the biopsy.

3937  
3938 Prophylactic quinolone antibiotics shall be given as per local guidelines. Biopsies will  
3939 be performed via the trans-rectal route or via the trans-perineal route depending  
3940 upon local practice.

3941  
3942 Targeted biopsies should be performed by software-assisted fusion devices  
3943 (i.e.(Artemis, made by Eigen, or Urostation, by Koelis)[34, 36, 37, 40,41].This  
3944 software is safe and poses no risks to the subject since the same CE-marked  
3945 ultrasound probes that are designed to perform the biopsy when performed as  
3946 standard of care biopsy are used during targeted biopsy. Should the operator wish to  
3947 not use the information provided by the software registration system and use  
3948 cognitive (visual) registration alone they can do so, but should indicate this on the  
3949 subject's case report form.

3950  
3951 The samples per target will be 4cores spread across the target region for a maximum  
3952 total of 12 cores as a maximum of 3 targets can be identified. Biopsies should be  
3953 conducted in order meaning T1 then T2 then T3.

3954  
3955 Biopsy cores from different suspicious areas will be aliquoted separately. The vials  
3956 will be labeled "T1a-d", "T2a-d" and "T3a-d" (according to how many targets there  
3957 are) which should match the assignment of suspicious areas by the radiologist on the  
3958 MRI report. The order of lettering a-d should match the order in which the biopsies  
3959 were performed in each region. The first biopsy should be at the center of the target  
3960 and the remaining fanning out from the center. Each core from the same suspicious  
3961 area must be submitted separately. Alternative methods of storing cores that allow  
3962 identification of the order of score samples from each target are acceptable.

3963  
3964  
3965

- 
- 3966 **10.5 Systematic TRUS guided biopsy**
- 3967 **For all subjects in Arm B**
- 3968 Systematic TRUS guided biopsy is the current standard of care for the diagnosis of  
3969 prostate cancer [4, 17]. Systematic TRUS guided biopsy can be performed at the local  
3970 site of recruitment.
- 3971
- 3972 A clinician competent in systematic TRUS guided biopsy will perform the procedure.  
3973 The experience of the operator (number of systematic TRUS guided biopsies  
3974 performed to date) will be recorded prior to each procedure. Software that guides  
3975 clinicians in placing biopsy cores should not be used.
- 3976
- 3977 Coumarin anticoagulant, clopidogrel treatment and other relevant  
3978 anticoagulant/antiplatelet medication will be discontinued 5 to 10 days before biopsy  
3979 and advice sought as to appropriate substitutes if indicated. Aspirin will be continued  
3980 at the discretion of the physician doing the biopsy.
- 3981
- 3982 The subject will be positioned in left lateral position. 10-12 core biopsies will be  
3983 taken as per guidelines [42] under appropriate anaesthesia. Biopsies will be directed  
3984 to the peripheral zone (See Appendix 3 for standardized method for conducting 12-  
3985 core systematic TRUS guided biopsy). Prophylactic quinolone antibiotics shall be  
3986 given as per local guidelines.
- 3987 **10.6 Pathology**
- 3988 The 2005 International Society of Urological Pathology guidelines for Gleason  
3989 Grading of Prostatic Carcinoma will be followed [43].
- 3990
- 3991 For men undergoing MRI-targeted biopsy it is required that pathology reported per  
3992 suspicious area targeted and per targeted core. For systematic TRUS guided biopsy,  
3993 each core will be reported and graded.
- 3994 **10.7 Post-procedural care**
- 3995 **For all subjects in ARMS A and B receiving a biopsy**
- 3996 After a biopsy procedure the subject can be discharged. within 2-3 weeks for results  
3997 of the histopathology and treatment options to be discussed.
- 3998 **10.8 Immediate post-biopsy questionnaire**
- 3999 **For all subjects in ARMS A and B receiving a biopsy**
- 4000 A modified version of a self-reported questionnaire validated previously [39] in the  
4001 assessment of post-biopsy complications will be completed immediately post-biopsy  
4002 after MRI-TB and after systematic TRUS guided biopsy (Appendix 7). The subject  
4003 should complete the immediate post-biopsy questionnaire before they leave the  
4004 department. It aims to assess intensity of discomfort and pain associated with the  
4005 procedure.
- 4006 **10.9 30-day post-biopsy questionnaire**
- 4007 **For all subjects in ARMS A and B receiving a biopsy**

---

4008 A modified version of a self-reported questionnaire validated previously [39] in the  
4009 assessment of post-biopsy complications at 30 days post-biopsy should be given to  
4010 all subjects undergoing MRI-TB or systematic TRUS guided biopsy to take home  
4011 (Appendix 8). The subject should fill this out on day 30 following the procedure. It  
4012 should take 5 minutes to fill out. The date that the participant should complete the  
4013 questionnaire should be written on top of the questionnaire. Data on specific biopsy-  
4014 related complications including pain, fever, hematuria, hematochezia,  
4015 hematospermia, urinary retention and urinary incontinence will be recorded. Any  
4016 other adverse events will not be recorded. Contact with healthcare and resource  
4017 used data following the biopsy will also be ascertained. The completed questionnaire  
4018 can be returned to the investigator in a pre-addressed envelope.

4019

4020 Subjects should be reminded at 30 days to complete this questionnaire.

#### 4021 **10.10 Results and treatment decision (Visit 4)**

4022 The results of the biopsies and/or MRI will be explained to the subject by the clinical  
4023 care team during this visit, which is approximately 2-3 weeks after the biopsy.

4024 The research team should record the treatment decision in the subject file.

4025 Possibilities for treatment decision include but are not limited to:

- 4026 • Further diagnostic test (e.g. PSA, biopsy, MRI)
- 4027 • Active Surveillance
- 4028 • Radical treatment (e.g. radical prostatectomy, radical radiotherapy)
- 4029 • Focal therapy (e.g. high intensity focused ultrasound, cryotherapy)
- 4030 • Hormone therapy

#### 4031 **10.11 Follow up period**

4032 All study participants will be followed up for up to two years or until they have  
4033 radical treatment. Each year, subjects will be surveyed to obtain the following  
4034 information:

- 4035 • time to cancer diagnosis
- 4036 • Gleason score progression
- 4037 • time to intervention on active surveillance
- 4038 • time on active surveillance
- 4039 • PSA

4040

##### 4041 **10.11.1 Indications for biopsies off protocol**

4042 For subjects who are not biopsied due to a negative MRI, have negative or non-  
4043 significant systematic biopsies, or who have a positive MRI but no or non-significant  
4044 cancer on targeted biopsy, the following are guidelines for subjects management  
4045 during the 2 year follow up period.

4046 It is an accepted standard of care in Ontario for subjects on active surveillance or  
4047 with a prior negative biopsy who have a worsening risk profile to undergo mpMRI  
4048 followed by targeted biopsy. We propose the following guidelines for risk profile  
4049 assessment and consideration of repeat biopsy

---

4050 Subjects should continue to be followed with semi-annual PSA and DRE. A biopsy  
4051 should be considered under one or more of the following circumstances:

- 4052 1. For men with PSA density < 0.15, biopsy if an increase in PSA density > 0.15.
- 4053 2. For men with PSA density > 0.15, or a baseline PSA > 10, biopsy if a 50% increase  
4054 in PSA in 1 year.
- 4055 3. Biopsy if a doubling of the risk of high grade cancer according to the NCI  
4056 nomogram.
- 4057 4. Biopsy if development of a suspicious nodule on DRE.  
4058
- 4059 5. For men with a positive study MRI (especially PI-rads 4 or 5) and a targeted biopsy  
4060 which was negative or showed only Gleason 6 cancer, biopsy if there is a 50% or  
4061 more increase in PSA over 1 year or a PSA density > 0.15.  
4062
- 4063 12. For men on the systematic biopsy arm which was negative or showed only  
4064 Gleason 6 cancer, biopsy if there is a 50% or more increase in PSA over 1 year or  
4065 a PSA density > 0.15. An MRI and targeted biopsy may be warranted in these  
4066 subjects.

4067

4068

4069 These are guidelines and should be interpreted with clinical judgment.

4070

4071 Follow-up will cease once treatment beyond active surveillance is undertaken  
4072 (prostatectomy, radiation therapy, focal therapy, etc.)

4073 PSA and biopsy results will be evaluated in subjects in whom the 2 year MRI  
4074 identifies a target.

## 4075 **10.12 Additional tests for biomarker discovery - Optional**

4076 Though not related to the primary outcome of this study, this cohort represents a  
4077 unique opportunity to obtain human samples for future biomarker discovery studies.  
4078 Participants will be consented to provide a blood, urine, semen, and tissue sample  
4079 after the consent and screen visit, and subsequent visits for storage and use in future  
4080 biomarker studies. In addition, men will be consented for use of the prostate biopsy  
4081 tissue in the biomarker discovery studies.

4082

4083 We propose two initial biomarker analyses for men recruited to the PRECISE study.  
4084 First we propose testing the utility of existing validated tests, these potentially  
4085 include the Genomic Prostate Score (OncotypeDx) [44] and a recently developed  
4086 multiple Kallikrein biomarker test[45]. We will test the hypothesis that alongside  
4087 conventional PSA measurements, the multiple Kallikrein test or other serum  
4088 biomarker test, may identify subjects whose MRI was initially negative for prostate  
4089 cancer, but who are at high risk of harboring clinically significant disease as detected  
4090 by the secondary MRI at 2 years. We will also test the association between serum  
4091 biomarkers and clinically significant or clinically insignificant prostate cancer  
4092 detected during the PRECISE study. We will also explore the potential for the



---

4093 Genomic Prostate Score to provide additional information over and above Gleason  
4094 grade. These studies will be separately funded from PRECISE.  
4095  
4096 Sequential blood sampling during the 2 years of follow up (prior to a 2 year MRI) will  
4097 be planned to assess markers which might identify men at higher risk of developing  
4098 prostate cancer.

4099 **10.12.1 Samples to be collected for future biomarker discovery work**  
4100 **(Optional)**

4101 Participants will be asked to consent to provide a blood, urine, semen, and tissue  
4102 sample after the consent and screen visit and subsequent visits for storage and use  
4103 in future biomarker studies. This will involve a separate consent form.

4104 Samples include:

- 4105 • Blood –10mls serum, 15mls plasma, 10mls whole blood, 5mls buffy coat
- 4106 • Urine – 75 mls urine
- 4107 • Semen-1-5 cc (single ejaculate)
- 4108 • Tissue-unstained biopsy sections -15 unstained slides from cancer, and  
4109 -15 unstained slide from non-cancer cores  
4110 (if possible)

4111 **10.13 Long-term data linkage – Permission to Contact**

4112 The cohort of men who consent to participate in this study represent a uniquely  
4113 characterized group. Their long-term outcomes will contribute to our understanding  
4114 of the epidemiology of prostate cancer beyond the questions being addressed in this  
4115 study.

4116

4117 Permission to Contact (PTC) is a feasible mechanism to engage subjects in research  
4118 programs. This will allow researchers to contact study participants in the future to  
4119 assess their willingness to respond to questionnaires. This potentially enables  
4120 research that would complement the planned long-term follow up in terms of health  
4121 status, for obtaining information about future biopsies not included in the study, and  
4122 allow assessment of quality of life.

4123 **10.14 End of Study**

4124 The end of study assessment comprises an essential safety evaluation that should be  
4125 completed prior to discharging any subject from the study.

- 4126 • Adverse events;
- 4127 • PSA measurement;
- 4128 • EQ-5D-5L questionnaire;
- 4129 • An MRI in those who did NOT have a biopsy;
- 4130 • Complete CRF.

4131 **10.15 Risks and Benefits to Participants**

4132 An important consideration of this study is that men are being randomized to one of  
4133 two biopsy techniques when it is not known which will be more effective. Both  
4134 diagnostic tests are currently used in clinical practice at the institutions involved in

---

4135 the trial. Though systematic TRUS guided biopsy could be considered standard of  
4136 care, there is enough evidence to support the concept that MRI-targeted biopsy may  
4137 be at least as effective as systematic TRUS guided biopsy[27].

### 4138 **10.15.1 Risks to subjects**

4139 The intervention proposed in this trial (MRI-biopsy) do not offer participants any  
4140 more risk than if they underwent standard of care (systematic TRUS guided biopsy)  
4141 for the diagnosis of prostate cancer.

#### 4142 **10.15.1.1 Risk of Systematic TRUS guided biopsy**

4143 Systematic TRUS guided biopsy can be associated with discomfort, haematuria,  
4144 haematospermia and dysuria in a large proportion of subjects, which is self-resolving  
4145 (See Table 4). There is a 4% risk of systemic urosepsis[46].

#### 4146 **10.15.1.2 Risks of MPMRI**

4147 MRI is associated with few risks. It is a safe procedure used in everyday clinical  
4148 practice (See Table 4). Small risks of allergic reactions are associated with the  
4149 intravenous administration of gadolinium, the contrast agent used in MRI scans. The  
4150 study uses a low molecular weight Gd chelate as a contrast agent (Gadovist, Bayer,  
4151 gadobutrol – generic). This contrast agent is used routinely for contrast enhanced  
4152 MRI and is approved by Health Canada. Subjects will be screened for any  
4153 contraindications to Gd injection or to MRI as per current clinical Dept of Medical  
4154 Imaging protocols at each institution. The commonest reported sides effects are of  
4155 limited duration and mild to moderate in intensity and include headache,  
4156 vasodilation, injection site pain, nausea, dizziness, rash, and dyspnea. The incidence  
4157 of these are <1%. Severe life threatening reactions such as severe anaphylaxis occur  
4158 very rarely, about 1:10,000-1: 100,000. These are treatable with epinephrine and  
4159 steroids. The risk of death is <1:100,000. There is a known risk of nephrogenic  
4160 systemic fibrosis, a potentially fatal condition in subjects with impaired renal  
4161 function, with an eGFR <30ml/min/1.73m<sup>2</sup>. These subjects are ineligible for this  
4162 study.

#### 4163 **10.15.1.3 Risks of MRI-targeted biopsy**

4164 MRI-targeted biopsy is associated with similar risks to the standard of care  
4165 systematic TRUS guided biopsy. As fewer biopsy cores are being taken with MRI-  
4166 targeted biopsy, the theoretical risk of adverse events associated may be less than  
4167 that of systematic TRUS guided biopsy. In addition, as a proportion of men may not  
4168 require a biopsy (approximately 30%) on a group level there will be reduced number  
4169 of men experiencing these complications, which is one of the major advantages of an  
4170 MRI-based approach.

4171  
4172  
4173  
4174  
4175  
4176  
4177  
4178

4179  
 4180  
 4181  
 4182  
 4183  
 4184

**Table 4: Adverse events associated with procedures**

| Procedure<br>Side<br>Effect       | Systematic TRUS<br>guided<br>biopsy(Standard of<br>care) | MRI                                                                                                                                                                                                                | MRI-targeted biopsy                                               |
|-----------------------------------|----------------------------------------------------------|--------------------------------------------------------------------------------------------------------------------------------------------------------------------------------------------------------------------|-------------------------------------------------------------------|
| Pain / discomfort                 | Some have discomfort<br>Some have pain                   | Intravenous<br>cannulation (to allow<br>contrast<br>administration) can<br>cause minimal<br>discomfort                                                                                                             | Similar / reduced compared<br>to systematic TRUS guided<br>biopsy |
| Dysuria                           | Majority have dysuria<br>(self-resolving in 2-3<br>days) | No                                                                                                                                                                                                                 | Similar / reduced compared<br>to systematic TRUS guided<br>biopsy |
| Haematuria                        | Majority (self-resolving,<br>2-3 days)                   | No                                                                                                                                                                                                                 | Similar / reduced compared<br>to systematic TRUS guided<br>biopsy |
| Haemospermia                      | Majority (self-resolving,<br>1-2 weeks)                  | No                                                                                                                                                                                                                 | Similar / reduced compared<br>to systematic TRUS guided<br>biopsy |
| Erectile dysfunction              | 30% (self resolving after<br>1-2 months)                 | No                                                                                                                                                                                                                 | Similar / reduced compared<br>to systematic TRUS guided<br>biopsy |
| Urinary Tract<br>infection        | 1-8 %                                                    | No                                                                                                                                                                                                                 | Similar / reduced compared<br>to systematic TRUS guided<br>biopsy |
| Systemic urosepsis                | 2-4%                                                     | No                                                                                                                                                                                                                 | Similar / reduced compared<br>to systematic TRUS guided<br>biopsy |
| Urinary retention                 | 1%                                                       | No                                                                                                                                                                                                                 | Similar / reduced compared<br>to systematic TRUS guided<br>biopsy |
| Contrast allergy                  | N/A                                                      | Rare<br>< 1 in 10000 – severe<br>allergic reaction<br>(breathing problems)<br>< 1 in 2000 –<br>moderate allergic<br>reaction (nausea and<br>vomiting)<br>< 1 in 250 – mild<br>allergic reaction (rash,<br>itching) | N/A                                                               |
| Adverse effects of<br>antibiotics | Rare<br><1%                                              | N/A                                                                                                                                                                                                                | Rare<br><1%                                                       |

4185

4186

4187

---

4188 **10.15.2 Benefits to subjects**

4189 Subjects enrolled in this trial will benefit from the following:

- 4190 • Subjects in both arms may benefit from receiving a diagnostic test for suspected  
4191 prostate cancer and will receive further treatment if required. The research team  
4192 will also ensure streamlined diagnostic investigations to promptly conduct the  
4193 diagnostic test and communicate the test outcome for the subject.
- 4194 • Subjects enrolled in the trial will benefit from the dedicated research team  
4195 involved in their care in addition to the clinical team normally involved in their  
4196 care.
- 4197 • Subjects will benefit from additional discussions regarding the trial, which could  
4198 increase their understanding of prostate cancer and help them to make a more  
4199 informed decision about their health.
- 4200 • Subjects randomized to the MRI arm may benefit by avoiding a biopsy. This will  
4201 remove any risk of post-biopsy infection. MRI-randomized subjects may also  
4202 benefit from a reduced probability of having a clinically insignificant prostate  
4203 cancer diagnosed. Clinically insignificant prostate cancer is often treated  
4204 definitively per subject preference despite the lack of evidence supporting the  
4205 need. All definitive local therapies for prostate cancer carry the risk of peri-  
4206 operative complications as well as long-term risk of incontinence and erectile  
4207 dysfunction.

4208

4209 **10.16 Concomitant medications**

4210 **10.16.1 Permitted Medications**

4211 All concomitant medications taken during the study will be recorded in the CRF with  
4212 indication, dose information and dates of administration. The definition of which  
4213 medication would be considered outside the routine medical practice is up to the  
4214 discretion of the investigator. All dietary and herbal supplement usage will be  
4215 recorded in the CRF.

4216 **10.16.2 Non-Drug Therapies**

4217 Any occurrence of prostate-related surgical and/or non-surgical (or minimally  
4218 invasive) intervention during the conduct of the study will be recorded in the CRF.

4219

4220 **11. Schedule of Study Visits**

4221 **11.1 Visit 1 (Screening/Randomization): Screening, Consent,**  
4222 **Randomization**

4223 **For all subjects enrolled in trial**

4224 Screening will occur any time following the referral of the subject. Ideally, this will be  
4225 performed as soon as possible following receipt of referral.

4226 Subjects will be consented only after they have had time to consider the study. This  
4227 may happen on the same visit as the screening visit.

---

4228 Randomization can happen immediately after the consent form is signed and  
4229 eligibility is confirmed.  
4230  
4231 Once enrolled into the study, subjects will be asked to fill out an EQ-5D-5L  
4232 questionnaire (Appendix 4), which is a validated 2-page questionnaire representing  
4233 health related quality of life. It takes approximately 2 minutes to complete. This  
4234 questionnaires should be completed at the screening visit before the subject leaves  
4235 the clinic.  
4236  
4237 If a subject agrees to the optional informed consent, from randomization until any  
4238 point prior to a biopsy, optional blood, urine, semen and tissue samples will be  
4239 collected for correlative studies.  
4240  
4241 Even if PSA testing was done prior to Visit 1, PSA should be obtained at Visit 1.  
4242

### 4243 **11.2 Visit 2 (MRI): ARM A, for men randomized to MRI**

4244 This will occur approximately within one week of randomization. Men will receive an  
4245 MRI (see Section 10.2.)

### 4246 **11.3 Visit 3 (Biopsy): ARM A, MRI-Targeted Biopsy of Prostate**

4247 **For men randomized to ARM A, who have a lesion identified by MRI.** This  
4248 appointment will follow approximately one-two weeks of MRI.

4249  
4250 Depending on local Urology service structure, an appointment for a biopsy may need  
4251 to be booked at the same time as the MRI is booked (i.e. immediately after  
4252 randomization) in order for a biopsy to occur in timely fashion. If the results of the  
4253 MRI show that a biopsy is not required, then the biopsy appointment can be used  
4254 instead of Visit 4 for follow up of results and treatment decision.  
4255

4256 Men with a positive MRI (i.e. PI-RADS score of 3-5) will receive a MRI targeted biopsy  
4257 of the prostate (see Section 10.6). Men will complete an Immediate Post Biopsy  
4258 Questionnaire (Appendix 7) ideally completed and returned immediately after a  
4259 biopsy, before the subject leaves the department. In addition, subject needs to  
4260 complete an EQ-5D-5L Questionnaire (Appendix 4) 24-48 hours post-biopsy.  
4261

4262 Subjects will be given a 30-day post-biopsy questionnaire to take home after biopsy  
4263 and complete as instructed on day 30 post-biopsy. This is to be returned by post or  
4264 at the 30 day follow up appointment (Visit 4). If Visit 4 is earlier than 30 days post  
4265 biopsy then this questionnaire can be given to the research team when 30 days is  
4266 finally complete. If Visit 4 is on or later than 30 days then this can be returned at the  
4267 Visit 4 appointment. As long as questionnaire is completed at 30-60 days post-  
4268 biopsy, it will be acceptable, however, the questionnaire should be completed as  
4269 close as possible to 30 days post-biopsy.  
4270

4271 At 30-days post biopsy interval, a member of the research team will call the subject  
4272 to remind them to complete and return the 30-day questionnaires.

---

4273 **11.4 Visit 3 (Biopsy): ARM B, for men randomized to a systematic**  
4274 **TRUS-biopsy**

4275 **For men randomized to ARM B only.**

4276  
4277 Men will receive a standardized TRUS-guided biopsy(see Section 10.7.) Men will  
4278 complete an Immediate Post Biopsy Questionnaire (Appendix 7) ideally completed  
4279 and returned immediately after the biopsy.

4280 Subjects will be given a 30-day post-biopsy questionnaire to take home after biopsy  
4281 and completed as instructed on day 30 post-biopsy. This is to be returned by post or  
4282 at the 30 day follow up appointment (Visit 4). If Visit 4 is earlier than 30 days post  
4283 biopsy then this questionnaire can be given to the research team when 30 days is  
4284 reached. If Visit 4 is on or later than 30 days then this can be returned at the Visit 4  
4285 appointment. As long as the questionnaire is completed at 30-60 days post-biopsy, it  
4286 will be acceptable, however the questionnaire should be completed as close as  
4287 possible to 30 days post-biopsy.

4288  
4289 At 30-days post biopsy a member of the research team will call the subject to remind  
4290 them to complete and return the 30-day questionnaires.

4291 **11.5 Visit 4 (Post-test follow up): ARM A, for men who did not receive a**  
4292 **biopsy**

4293 This appointment will include a follow up meeting with the investigator to discuss  
4294 the results of the MRI as well as treatment decisions. This follow up should occur  
4295 after the availability of the MRI report. At this visit the subject will also complete a  
4296 30-day post intervention EQ-5D-5L Questionnaire.

4297  
4298 Subjects will complete a Post-MRI 30-day questionnaire (Appendix 8),which has been  
4299 posted to them by the research team. If Visit 4 is earlier than 30 days post MRI then  
4300 this questionnaire can be given to the research team when 30-days is finally  
4301 complete. If Visit 4 is on or later than 30 days then this can be returned at the Visit 4  
4302 appointment. As long as questionnaire is completed at 30-60 days post-MRI, it will  
4303 be acceptable, however the questionnaire should be completed as close as possible  
4304 to 30 days post-MRI.

4305  
4306 At 30-days post MRI, a member of the research team will call the subject to remind  
4307 them to complete the 30-day questionnaires.

4308 **11.6 Visit 4 (Post-test follow up): For all men who received a biopsy**

4309 This appointment will include a follow up meeting with the investigator to discuss  
4310 the results of the biopsy as well as treatment decisions. This should be completed as  
4311 soon as possible following the availability of any pathology results. The follow up  
4312 appointment should be within 1 month of the biopsy. Depending on local Urology  
4313 service structure, these results may need to be discussed at an MDT meeting to  
4314 inform treatment decision.

4315  
4316 The research team should record the treatment decision in the subject file.  
4317

- 
- 4318 Possibilities for treatment decision include but are not limited to:
- 4319     • Further diagnostic test (e.g. PSA, biopsy, MRI)
- 4320     • Active Surveillance
- 4321     • Radical treatment (e.g. radical prostatectomy, radical radiotherapy)
- 4322     • Focal therapy (e.g. high intensity focused ultrasound, cryotherapy)
- 4323     • Hormone therapy
- 4324
- 4325 At this visit the subject will also receive a 30-day post intervention EQ-5D-5L
- 4326 Questionnaire to complete. Subjects will also complete a 30-day Post Biopsy
- 4327 questionnaire (Appendix 8), which has been posted to them by the research team.
- 4328 The questionnaire needs to be completed on the 30<sup>th</sup> day post-intervention (i.e. post
- 4329 biopsy). However it will be accepted if completed up to 72 hours prior to or after the
- 4330 30<sup>th</sup> day. A telephone reminder from the research team to the subject can take
- 4331 place.
- 4332
- 4333 **11.7 Visit 5 (6 month follow up):26 week follow up**
- 4334 All subjects will have a 26 week visit
- 4335 Subjects will have the following:
- 4336     • PSA
- 4337     • Optional sample collection (blood, urine)
- 4338 **11.8 Visit 6(1 year follow up): 52 week follow up**
- 4339 All subjects are planned to have a 52 week follow up visit.
- 4340 Subjects will be followed to obtain the following information on an annual basis:
- 4341     • time to cancer diagnosis;
- 4342     • Gleason score progression;
- 4343     • time to intervention on active surveillance;
- 4344     • time on active surveillance;
- 4345     • results of PSA tests.
- 4346     • Time to follow up biopsy and/or mpMRI if performed (see follow up
- 4347         guidelines)
- 4348     • Indication for follow up biopsy
- 4349     • Was MRI performed prior to follow up biopsy
- 4350     • Was the biopsy systematic, targeted only or both systematic + targets, not
- 4351         done because of negative MRI
- 4352     • Optional sample collection (blood, urine)
- 4353
- 4354 Those subjects randomized to ARM A but who did not have an MRI-targeted biopsy
- 4355 will have an additional MRI at Visit 6 (year 2).
- 4356 **11.9 Visit 7 (18 month follow up): 78 week follow up**
- 4357 All subjects will have a 78 week visit
- 4358 Subjects will have the following:
- 4359     • PSA
- 4360     • Optional sample collection (blood, urine)

---

4361

4362 **11.10 Visit 8 (2 year follow up): End of study**

4363 All study participants will be followed for up to two years or until they undergo  
4364 radical treatment

4365 Subjects will be followed to obtain the following information on an annual basis:

- 4366 • time to cancer diagnosis;
- 4367 • Gleason score progression;
- 4368 • time to intervention on active surveillance;
- 4369 • time on active surveillance;
- 4370 • results of PSA tests.
- 4371 • Optional sample collection (blood, urine)
- 4372
- 4373 • Time to follow up biopsy and/or mpMRI if performed (see follow up  
4374 guidelines)
  - 4375 ○ Indication for follow up biopsy
  - 4376 ○ Was MRI performed prior to follow up biopsy
  - 4377 ○ Was the biopsy systematic, targets only or both systematic + targets,  
4378 not done because of negative mpMRI
- 4379
- 4380

4381 Follow-up will cease once treatment beyond active surveillance is undertaken  
4382 (prostatectomy, radiation therapy, focal therapy, etc.).

4383

4384 Those subjects randomized to ARM A but who did not have an MRI-targeted biopsy  
4385 will have an additional MRI at Visit 8.

4386

4387 **12. Randomization**

4388 **12.1 Randomization Procedure**

4389 Written informed consent will be obtained from all eligible subjects prior to  
4390 commencing any study related procedures. The Ontario Clinical Oncology Group  
4391 (OCOG) Coordinating and Methods Centre (CMC) located at the Research Centre,  
4392 Juravinski Hospital and Cancer Centre, Hamilton, Ontario will centrally coordinate  
4393 subject randomization. Subjects will be allocated to the two treatment arms in an  
4394 approximate 1:1 ratio by use of a dynamic allocation scheme[47].

4395

4396 After documentation of written informed consent and confirmation of subject  
4397 eligibility, clinical centres will randomize the subject by accessing the CMC's web-  
4398 based Interactive Registration/Randomization System (IRIS). Prior to randomization  
4399 and treatment allocation, the subjects' individualized risk of high-grade prostate  
4400 cancer, obtained using the PCPTRC 2.0 calculator found at  
4401 <http://deb.uthscsa.edu/URORiskCalc/Pages/calcs.jsp> must be determined.



---

4402 **12.2 Stratification**

4403 Eligible, consenting subjects will be stratified by: (1) individualized risk of high-grade  
4404 prostate cancer (5% to 25%, >25%); and (2) clinical centre

4405 **12.3 Blinding and measures taken to avoid bias**

4406 This study is unblinded, and all subjects will be aware of the treatment that they are  
4407 receiving. As the MRI scan is unique to one of the arms it will not be possible to blind  
4408 the participants or investigators as to what intervention is being received. Therefore,  
4409 participants will be informed which arm they have been allocated to. Where  
4410 possible, the data will be coded so as to blind individuals analyzing the data from  
4411 which of the groups the data was from. Summary details of randomized allocation  
4412 and outcomes will not be made available (unless specifically authorized by the Trial  
4413 Steering Committee and/or Data Monitoring Committee) in order to maintain the  
4414 overall blind of the trial.

4415

4416 Radiologists will be blinded to subject information. (e.g. PSA level Radiologists will be  
4417 aware that the subject is part of the trial.

4418 Pathologists will be blinded to the cohort allocation. Concealment may be  
4419 challenging due to the different number of cores in the two groups, but this is  
4420 unavoidable. This is unlikely to represent a significant source of bias.

4421

4422

4423 **13. Data**

4424

4425 Type of data to be collected:

- 4426 • EQ-5D–5L questionnaires. These will measure quality of life and will be measured  
4427 continuously throughout the trial.
- 4428 • Systematic TRUS guided biopsy– pathology – categorical (e.g. Gleason grade) and  
4429 continuous data (e.g. maximum cancer core length)
- 4430 • MRI – diagram representing MRI; categorical data for areas and scores of  
4431 suspicion (e.g. Sector 1p, score of suspicion 4/5)
- 4432 • MRI-targeted biopsy – pathology – categorical (e.g. Gleason grade) and  
4433 continuous data (e.g. maximum cancer core length)
- 4434 • Post-biopsy immediate and 30-day questionnaires – categorical data (e.g. fevers  
4435 yes/no)
- 4436 • Treatment decisions – categorical data (e.g. radical treatment)
- 4437 • PSA – continuous data (e.g. value of PSA in ng/ml)

4438

4439 Please see **Appendix1** for the time window for data collection.

---

4440

4441 **14. Statistical Considerations**

4442 **14.1 Sample Size Calculation**

4443 **STATISTICAL methods**

4444 **Primary Analysis**

4445 Absolute differences in the proportion of clinically significant cancer detected  
4446 between arms will be calculated and compared using the Clopper-Pearson method.  
4447 If the lower boundary of an one-sided, 97.5% confidence interval for the difference  
4448 in detection rates of MPMRI-TB compared to systematic TRUS guided biopsy is less  
4449 than -5% then MPMRI-TB will be deemed non-inferior. In the event that the lower  
4450 bound is greater than zero, superiority can be claimed.

4451

4452 A supportive analysis will be performed by using a logistic regression model,  
4453 evaluating the odds ratio for detecting high grade cancers, adjusted for stratification  
4454 factors. MRI-guided biopsy would be considered non-inferior if the lower bound of  
4455 the two-sided, 95% confidence interval for the odds ratio exceeds 0.78. This lower  
4456 bound was calculated to approximate an absolute 5% difference of interest (NOTE:  
4457 the unadjusted odds ratio is 0.78 when treatment A is 30% and treatment B is 25%).

4458

4459 **Secondary Analyses**

4460 For each secondary outcome, where appropriate, a difference in proportions with  
4461 95% CI, or a difference in means with 95% CI, as appropriate, will be presented.  
4462 Differences in the 1-year and 2-year rates along with 95% CI will be calculated for  
4463 time-to-event outcomes.

4464

4465  $\chi^2$  tests, t-tests or Wilcoxon rank sum tests, and log-rank tests will be used to test for  
4466 differences between allocation arms in secondary outcomes. Logistic regression and  
4467 Cox proportional hazards regression will be used to examine the effect of allocation  
4468 arm on outcomes, adjusted for stratification factors. All secondary outcomes will be  
4469 two-sided and statistical significance will be set at the  $\alpha=0.05$  level. No statistical  
4470 adjustments will be made due to multiple testing, however, results for secondary  
4471 outcomes will be interpreted cautiously, acknowledging that tests were performed  
4472 on secondary outcomes and numerous secondary tests were performed. Figures and  
4473 tables will be used to illustrate results of interest.

4474

4475 **Treatment Allocation and Stratification**

4476 Subjects will be allocated to the two allocation arms in an approximate 1:1 ratio by  
4477 use of a dynamic allocation scheme. Specifically, the first 20 subjects will be  
4478 randomly allocated to arm in an approximate 1:1 ratio. After the first 20 subjects, a  
4479 biased coin method will be used, whereby the number of subjects within each  
4480 stratum will be calculated, and the next eligible subject will be allocated (with  
4481 probability  $p=0.8$ ) to the arm which reduces the imbalance. If no imbalance exists,  
4482 allocation to each arm will occur with probability  $p=0.5$ .

4483

4484 Stratification

4485 For treatment allocation, the subjects' individualized risk of high-grade prostate

---

4486 cancer will be determined. Risk will be assessed using the PCPTRC 2.0 calculator,  
4487 found at <http://deb.uthscsa.edu/URORiskCalc/Pages/calcs.jsp>. Eligible, consenting  
4488 subjects will be stratified by:  
4489 (1) individualized risk of high-grade prostate cancer (5% to 25%, >25%);  
4490 (2) clinical centre.

4491

#### 4492 **Sample Size**

4493 Rates of clinically significant cancer (Gleason  $\geq 7$ ) detection from targeted-alone  
4494 biopsy in a population with no prior biopsy have been shown to be 42% [37] and  
4495 50% from another study [36].

4496

4497 Rates of clinically significant cancer detection from one the largest studies of  
4498 systematic TRUS guided biopsy in men without prior biopsy are shown to be 27%  
4499 [49]. Therefore, based on these results, it may be assumed that targeted-biopsy will  
4500 detect clinically significant cancer in >15% more men (i.e. 42% versus 27%) than  
4501 systematic TRUS guided biopsy.

4502

4503 For this study, it will be conservatively hypothesized that systematic TRUS guided  
4504 biopsy will detect clinically significant cancer in 30% of men, and targeted biopsy will  
4505 detect clinically significant cancer in 10% more men (i.e. 40% total) than systematic  
4506 TRUS guided biopsy. For the non-inferiority hypothesis, using 90% power and 2.5%  
4507 one sided-alpha, assuming a targeted biopsy detection rate of clinically significant  
4508 cancer of 40%, and a detection rate for systematic TRUS guided biopsy of 30% and  
4509 using a margin of clinical unimportance of 5%, 211 men per arm will be required. The  
4510 choice of 5% as the margin of non-inferiority represents a difference that would be  
4511 considered clinically important.

4512

4513 Thus total men required in study = **422**.

4514

4515 To account potential withdrawal / loss to follow up and the effect of stratification,  
4516 the sample size will be inflated by 5%, and a target of **450 men** will be recruited.

4517

4518 Note that the rate of clinically significant cancers is very dependent on the  
4519 population registered for this study. It is possible that fewer (or more) subjects will  
4520 have clinically significant cancers than what is initially hypothesized. However, if the  
4521 population rate of clinically significant cancers is less (i.e. the systematic TRUS guided  
4522 biopsy detection rate is <30%) and other statistical assumptions remain as stated  
4523 previously, the statistical power will increase. The minimum statistical power would  
4524 be obtained if the clinically significant cancer detection rate was 45% for systematic  
4525 TRUS guided biopsy and 55% for targeted biopsy, which would still achieve >84%  
4526 power. Therefore, the sample size is sufficient to ensure non-inferiority, even if the  
4527 rate of clinically significant cancer in the population is miss-specified, assuming an  
4528 absolute difference of 10% between targeted and systematic TRUS guided  
4529 biopsy detection rates, and a 5% margin of non-inferiority.

4530

---

4531 **Statistical Conventions**

4532 For categorical data, tables will be presented showing the n and percentage  
4533 (n/N\*100%) of subjects. Analyses will be presented by study allocation arm  
4534 separately.

4535

4536 Duration of time will be described in either years, months or weeks, and calculated  
4537 using: (last date – first date + 1) / X, where X=365.25 for years, X=30.4 for months, or  
4538 X=7 for weeks. Example: Age (in years) will be calculated as: (randomization date –  
4539 date of birth + 1)/365.25.

4540

4541 Transformations of the data in order to meet statistical assumptions may be  
4542 considered. Type-1 error will be set to 5%. Standard diagnostic tools will be used to  
4543 assess any of the model fittings. All the statistical analysis will be carried out using  
4544 SAS version-9 and over for Windows (Cary, NC) or R version 3.2.2. (www.r-  
4545 project.org) or higher.

4546

4547 **Missing Data**

4548 Missing values for the primary endpoint will be examined closely. Sources and  
4549 reasons for the absence of data incurred as a result of subjects lost-to-follow up,  
4550 dropouts, and intermittent missing values will be described and explored by various  
4551 summary statistics as well as graphical displays between the two allocation arms.  
4552 Subjects' lost-to-follow up or dropouts will be explored and the characteristics of  
4553 those subjects will be described by allocation arm and tested using Fisher's exact  
4554 tests or Wilcoxon rank sum tests.

4555

4556 Missing data for secondary endpoints will be described. The methods for evaluating  
4557 missing data of the primary endpoint may be employed for endpoints of interest. For  
4558 summarization of baseline data, the following conventions will be used for partial  
4559 missing date information occurring prior to randomization (e.g. for medical history  
4560 or prior treatment). If year is missing, the date will be set at missing. If year is  
4561 available, but month and date is missing, the month and date will be set to July 1<sup>st</sup> of  
4562 the respective year. If date is missing, but year and month available, the day will be  
4563 set to the 15<sup>th</sup> of the respective month.

4564 **14.2 Interim Analyses**

4565

4566 The Trial Steering Committee (TSC), Data Safety and Monitoring Committee (DSMC)  
4567 or Trial PI may recommend cessation of the trial or suggestion modifications to trial  
4568 conduct if there are concerns about subject safety or futility. Unless otherwise  
4569 specified by one of these bodies, a futility analysis will be performed after  
4570 approximately 200 subjects are enrolled and have their primary outcome  
4571 ascertained. Simulation will be used to estimate the conditional probability of futility  
4572 assuming the study was to continue to completion, and assuming the clinically  
4573 significant cancer detection rate is 30% in both arms. If the conditional probability is  
4574 0.95 or higher that continuation of the study will result in a negative result, the  
4575 DSMC will recommend a suspension of recruitment to the trial, and initiation of a  
4576 quality assurance review. A decision to permanently close the study or continue with

---

4577 accrual will be determined by the Steering Committee, based on the results of the  
4578 quality assurance review, and the recommendation of the DSMC.

4579

#### 4580 **Timing of Final Analysis**

4581 A single, final, analysis will occur after all subjects have undergone their initial biopsy  
4582 and all data related to the initial biopsy is documented and validated. Follow-up  
4583 analyses will be conducted after all subjects have completed two years of follow-up.

### 4584 **14.3 Populations:**

4585 The per protocol, study population will consist of all subjects who satisfy all eligibility  
4586 criteria and are randomized to the study, who undergo MPMRI-TB or systematic  
4587 TRUS guided biopsy and have their primary outcome measured. This population will  
4588 be used for the primary analysis of non-inferiority.

4589 The intent-to-treat (ITT) population will consist of all subjects randomized to the  
4590 study, regardless of any protocol violations or if they do not complete the study as  
4591 defined in the protocol. The ITT population will be used as a supportive analysis of  
4592 the primary analysis, for all safety analyses, and for any analysis investigating  
4593 superiority.

### 4594 **14.4 Primary Outcome**

#### 4595 **14.4.1 Detection rate of clinically significant cancer**

4596 The proportion of men in each arm with clinically significant cancer (Gleason  $\geq 7$ ) will  
4597 be calculated based on histology results from biopsy procedures. Analysis will be on  
4598 the intention to treat population.

4599

4600 Absolute differences in proportion of clinically significant cancer detected between  
4601 arms will be calculated and compared. If the lower boundary of the 97.5%  
4602 confidence interval for the difference in detection rates of MPMRI-TB compared to  
4603 systematic TRUS guided biopsy is less than -5% then MPMRI-TB will be deemed non-  
4604 inferior. In the event that the lower bound is greater than zero, superiority can be  
4605 claimed.

4606

4607 The primary analysis will be conducted once all subjects have completed visit 4,  
4608 when the results of the biopsy or MRI are given to the subject.

4609

### 4610 **14.5 Secondary Outcomes**

4611 For each secondary outcome, where appropriate, a difference in proportions with  
4612 95% CI, or a difference in means with 95% CI, as appropriate, will be presented.

4613

#### 4614 **14.5.1 Proportion of men in each arm with clinically insignificant 4615 cancer detected**

4616 The proportion of men in each arm with clinically insignificant cancer (Gleason  $< 7$ )  
4617 will be calculated based on histology results from biopsy procedures. In addition, the  
4618 numbers with clinically insignificant cancer identified by MRI alone will also be  
4619 included.

---

4620

4621 **14.5.2 Proportion of men in each arm with Gleason  $\geq 4+3$  detected**

4622 The proportion of men in each arm with Gleason  $\geq 4+3$  will be calculated based on  
4623 histology results from biopsy procedures. In addition, the numbers with clinically  
4624 insignificant cancer identified by MRI alone will also be included.

4625

4626 **14.5.3 Proportion of men in MPMRI arm who avoid biopsy.**

4627

4628 **14.5.4 Proportion of men in the MRI arm whom the PI-RADS score for  
4629 suspicion of clinically significant cancer was 3, 4 or 5 but no clinically  
4630 significant cancer was detected.**

4631 The proportion of men in each arm whom the PI-RADS score for suspicion of  
4632 clinically significant cancer was 3, 4 or 5 but no clinically significant cancer was  
4633 detected, will be calculated based on histology results from biopsy procedures.

4634

4635 **14.5.5 Proportion of men in each arm who go on to definitive local  
4636 treatment (e.g. radical prostatectomy, radiotherapy, brachytherapy) or  
4637 systemic treatment (e.g. hormone therapy, chemotherapy)**

4638

4639

4640

4641 **14.5.8 Proportion of men with a negative MRI who progress within 24  
4642 months after their study MRI, or who are upgraded within 24 months**

4643 Men with a negative MRI who do not undergo a biopsy will have a follow-up MRI 2  
4644 years after their study MRI. We will determine the proportion of men whose  
4645 subsequent MRI shows a PI-RADS 3 or greater lesion. The results of targeted biopsy  
4646 of those lesions will be recorded and analyzed. The number of men who are  
4647 upgraded to Gleason  $\geq 7$  due to an off-protocol biopsy will also be recorded.

4648

4649 **14.5.9 Proportion of men with post-biopsy adverse events**

4650 Immediate post-biopsy discomfort and pain will be characterized by intensity using  
4651 the numerical analogue score. Scores for each arm will be compared. 30-day biopsy  
4652 specific complications and adverse events will be characterized according to their  
4653 presence, absence, duration and how much of a problem the symptoms caused the  
4654 subject. Whether the subject had contact with health care providers/system will also  
4655 be recorded. The proportion of individuals experiencing each symptom, proportion  
4656 in whom that symptom caused a problem and proportion who had contact with  
4657 healthcare providers/system will be calculated and compared qualitatively between  
4658 arms utilizing classification systems validated in previous studies [39]. The biopsy  
4659 specific complications that will be compared include pain, urinary retention, fever,  
4660 pain, erectile dysfunction, urinary incontinence, haematuria, haematochezia and  
4661 haemotospermia.

4662

4663 Any post-biopsy complications up to 30-days post biopsy procedure will be tabulated  
4664 and listed by duration and management.

4665

---

4666 **14.5.10 Health related quality of life**

4667 EQ-5D-5L descriptive domain summary indices and visual analogue scores will be  
4668 assessed at baseline, 24-48 hours post intervention and at 30-days and changes will  
4669 be compared between arms.

4670  
4671 EQ-5D was selected as a simple, low burden quality of life instrument that will  
4672 provide validated information on symptoms, particularly anxiety, that could be  
4673 compared across disease states and studies. Other subject-reported outcomes  
4674 directly linked to the interventions will be captured in the post-biopsy surveys. Since  
4675 it provides utilities, these will be incorporated into a secondary economic analysis if  
4676 the results permit.

4677

4678 **14.5.11 Proportion Gleason score upgrading in men undergoing radical**  
4679 **prostatectomy**

4680 Of the men who undergo radical prostatectomy, the proportion who have cancer  
4681 upgraded from the biopsy histopathology to the radical prostatectomy  
4682 histopathology in each arm will be calculated and compared.

4683

4684 **14.5.12 Cost Outcomes**

4685 As the study design for clinical outcomes is one of non-inferiority, the primary  
4686 economic analysis will be **cost minimization analysis**. The perspective of the  
4687 economic analysis will be that of the public payer. The primary goal of the analysis  
4688 will be to support arguments for public funding. Thus the costs of participant  
4689 burden, logistical challenges, and expense of obtaining societal costs, will not be  
4690 evaluated.

4691

4692 **14.5.12.1 Data collection:**

4693 As part of the informed consent process, participants in Ontario will also  
4694 consent to having their Ontario Health Insurance Number recorded, to be  
4695 later transferred to the Institute for Clinical Evaluative Sciences (ICES) where  
4696 it will be linked to a number of administrative claims databases recording  
4697 health system resource utilization such as physician billing [Ontario Health  
4698 Insurance Plan (OHIP); laboratory and diagnostic tests (OHIP); hospitalization  
4699 and surgery [Discharge AbstractDatabase (DAD)]; medications [Ontario Drug  
4700 Benefit (ODB) Formulary, New Drug Funding Program (NDFP), and Activity  
4701 Level Reporting (ALR)]; clinic and emergency department visits [National  
4702 Ambulatory Care Reporting System (NACRS), Emergency Department visits];  
4703 radiation (ALR); homecare (Home Care databases) and a few additional ones  
4704 as determined necessary (e.g., Long-term care, Mental Health, Diabetes. The  
4705 overall, number and proportion of health system resources will be  
4706 determined. In this way we can capture comprehensive resource utilization  
4707 related to on-trial management including any adverse events.

4708 **14.5.12.2 Health Insurance number handling and security**

4709 As the economic implications of this study are of prime importance to some  
4710 of the funders, the request for data linkage will be part of the main consent  
4711 form. If a participant indicates to the study team that they decline or

---

4712 withdraw consent, the OHIP number will be recorded as 9999-999-999-XX.  
4713 The OHIP numbers will stay with the participating institution until after  
4714 accrual is complete, and then they will all be transferred at one time under  
4715 data sharing agreements between ICES and each institution. Data will be  
4716 transferred using a secure electronic file transfer system established by ICES  
4717 and managed by authorized ICES personnel responsible for receiving  
4718 data. The file transfer system uses security safeguards including encryption  
4719 and authentication.

4720  
4721 ICES is a Prescribed Entity under the Personal Health Information Protection  
4722 Act (PHIPA), and can receive and use personal health information for  
4723 purposes of analysis and compiling statistical information and other research.  
4724 Its policies and procedures for privacy protection and data security have been  
4725 approved by Ontario's Privacy Commissioner. ICES is a secure facility, video-  
4726 monitored and requiring passkeys to access private offices and  
4727 computers. ICES has extensive experience in the protection of confidentiality  
4728 when using such data. It has a UNIX-based network that cannot be accessed  
4729 externally. ICES data facilities are fully 'moated' (no connections to other  
4730 computers). At ICES, routine procedures for data backup are instituted by a  
4731 data management team. The data is burned onto a CD or placed on an  
4732 external hard drive and placed in a locked vault. All ICES staff and scientific  
4733 affiliates are required to sign agreements of confidentiality annually. Internal  
4734 audits are conducted to monitor compliance with ICES policies, standards and  
4735 procedures.

4736  
4737 Study data with direct personal identifiers such as OHIP numbers will  
4738 reside on a dedicated and secure server at ICES and will only be  
4739 accessible by a named Data Covenantor. The Covenantor will encode  
4740 the OHIP number, replacing it with an ICES key number (IKN) (a code)  
4741 and transferring it to a "moated" server for the study project. (The  
4742 Data Covenantor is an ICES person named in our data sharing  
4743 agreements and identified to the Office of the Information and  
4744 Privacy Commissioner, who can access personal health information at  
4745 ICES for the purposes of receiving, coding, transferring or destroying  
4746 personal health information.) The coded study data will only be made  
4747 available to the Principal Investigator and project staff directly  
4748 responsible for data analysis (under the supervision of the  
4749 investigator). No subject, physician or institution will be identified in  
4750 the reporting of results

### 4752 **14.5.12.3 Cost calculation**

4753 Once the utilization of health services is determined from those cases linked  
4754 to administrative databases, publicly available costs (2016\$CAN) will be  
4755 applied to health services. Costs for physician and laboratory services will be  
4756 determined by applying that year's fee code. Costs for hospital care will be  
4757 estimated using the Canadian Institute for Health Information (CIHI) Resource  
4758 Intensity Weight method for the most recently available year. Outpatient



---

4759 prescription drug costs for participants not covered by ODB (those under age  
4760 65 and not on social assistance) will be considered to be the same as the trial  
4761 arm-specific average for those with coverage. Costs will then be inflated  
4762 using the healthcare-specific Consumer Price Index reported by Statistics  
4763 Canada into constant Canadian dollars for the year the study ends. Due to the  
4764 short time horizon, discounting will not be applied.

#### 4765 **14.5.12.4 Primary Analysis**

4766 A within-trial analysis will be conducted to calculate the total cost for each  
4767 arm and mean cost per subject for each arm. Frequency distributions and  
4768 measures of central tendency (e.g. means and medians) will be determined  
4769 for each resource category (e.g. hospitalizations)for each arm of the study.  
4770 Confidence intervals for the difference in costs and resource utilization  
4771 between the strategies overall and for each resource category will also be  
4772 calculated. Univariate comparisons between the groups will be made  
4773 primarily using nonparametric tests, such as Wilcoxon rank-sum test. In the  
4774 primary analysis, assuming equivalence in the primary outcome, an arm with  
4775 significantly lower mean costs will be considered the economically most  
4776 attractive approach.

4777  
4778 Should the clinical trial find a difference between the two arms on the  
4779 primary endpoint, an incremental cost-benefit analysis will be calculated by  
4780 deriving the additional cost per case of clinically significant cancer diagnosed,  
4781 according to the following equation:

4782

$$\text{Cost-benefit} = \frac{\text{Cost}_{(\text{Arm A})} - \text{Cost}_{(\text{Arm B})}}{\text{Diagnoses}_{(\text{Arm A})} - \text{Diagnoses}_{(\text{Arm B})}}$$

4783 The cost of avoiding each additional case of clinically insignificant cancer  
4784 diagnosed may also be similarly calculated. Consideration will be given to  
4785 extending this analysis using economic modeling with incorporation of utility  
4786 values from the EQ-5D to allow a lifetime perspective to be taken and the  
4787 estimation of quality adjusted life years (QALYs).

#### 4788 **14.5.12.5 Secondary Cost Analyses**

4789 One and multi-way sensitivity analyses will be carried out around major cost  
4790 drivers by varying the costs over their observed ranges and conducting  
4791 threshold analyses where appropriate. Sensitivity analyses will also be  
4792 performed to evaluate potential limitations in the data, such as ODB costs as  
4793 described above (though the proportion without ODB coverage should be  
4794 similar in the two arms, and it is not expected to be a major cost-driver).

4795

#### 4796 **14.5.13 Missing Data**

4797 The impact of missing data will be explored in all analyses; sensitivity  
4798 analyses/multiple imputation will be performed as appropriate.

4799

---

4800 **15. Participant compliance and withdrawal**

4801

4802 The study will be completed when at least 422 subjects have been randomized, have  
4803 undergone a diagnostic test and completed follow up. Compliance to randomized  
4804 treatment will be assessed by monitoring the completed forms, e.g. the systematic  
4805 TRUS guided biopsy form or the MRI-targeted biopsy form.

4806

4807 In consenting to the study, subjects are consenting to study monitoring, imaging and  
4808 biopsy procedures, follow-up, data collection and analysis. Subjects are allowed to  
4809 withdraw consent at any stage and their care will not be affected in any way. All  
4810 communication surrounding the withdrawal and its reasons should be noted in the  
4811 subject's record. Such cases should be reported to the PRECISE Study Operations  
4812 Office. Data up to the time of withdrawal can be included in the study.

4813

4814 As the study diagnostic tests are for suspected cancer it is not anticipated that there  
4815 will be significant loss to follow up.

4816

4817 **15.1 Subject Withdrawal from Study**

4818 A subject may discontinue participation in this study at any time at the investigator's  
4819 discretion or at the request of the subject.

4820

4821 If a subject discontinues at or before Visit 1 (randomization), he is not required to  
4822 complete end of study assessments.

4823

4824 If a subject discontinues after Visit 1 (randomization) for any reason, the investigator  
4825 should make every effort to complete the activities bulleted below.

4826

- 4827 • End of study assessments as outlined in **Section 10.17**.  
4828 • Any occurrence of death, prostatic surgical intervention, non-surgical treatment  
4829 for prostate cancer after study withdrawal should be documented in the CRF and  
4830 source documents.

4831

4832 Subjects who are discontinued from the study after randomization will not be  
4833 replaced. Subjects withdrawn from the study retain their subject number if already  
4834 given. New subjects will be allocated a new subject number.

4835

4836 In the event that a subject is prematurely discontinued from the study at any time  
4837 due to an AE, the procedures describe in **Section 16.3** must be followed.

4838

4839 Subjects should be withdrawn from the study for any of the following criteria:

- 4840 • Non-compliance with the requirements of the study.  
4841 • Request to discontinue treatment. This request can be made by either the  
4842 subject or the investigator.  
4843 • Develops progressive disease.

---

4844

4845 **15.2 Study completion**

4846 The primary end point will be reached when the last subject entered has their  
4847 systematic biopsy or MRI and targeted biopsy if indicated. All subjects will be  
4848 followed for up to 2 years following study entry or until they have radical treatment.  
4849 Subjects who are found to have significant prostate cancer and are treated will not  
4850 be included in follow up for this period. This includes subjects diagnosed as part of  
4851 study protocol, and subjects diagnosed during the follow up period by standard-of-  
4852 care procedures. However, post MRI/biopsy questionnaires will not be required  
4853 following non-protocol based procedures.

4854

4855 **16. Data Monitoring, Quality Control and Safety**

4856 **16.1 Stopping / discontinuation rules**

4857 The study will be completed when 450 participants have been randomized,  
4858 undergone a diagnostic test and completed follow up.

4859

4860 The Trial Steering Committee (TSC), Data Safety and Monitoring Committee (DSMC)  
4861 or Trial PI may recommend cessation of the trial or suggestion modifications to trial  
4862 conduct if there are concerns about subject safety or futility. See Section 14.2.1 for  
4863 further details on the interim analysis. Appropriate documentation as per the PI's  
4864 requirement will be completed if stopping the trial is necessary and the ethics  
4865 committee will be informed.

4866

4867 As the study is unblinded there will be no need for randomization code breaks.

4868

4869 **16.2 Monitoring, quality control and assurance**

4870

4871 Members of the trial team will be Good Clinical Practice (or equivalent) trained.

4872

4873 An independent DSMC will be appointed to monitor subject safety and the rate of  
4874 recruitment of subjects in the study. They will meet at least once a year whilst the  
4875 trial is ongoing for routine review of safety data and trial progression. They have the  
4876 power to call additional meetings and review data at any point in the trial should  
4877 they wish to do so.

4878

4879 The PI may also arrange an independent trial monitor to review the study data.

4880 **16.3 Assessment of safety**

4881 The investigator is responsible for the detection and documentation of events  
4882 meeting the criteria and definition of an AE or SAE as provided in this protocol.  
4883 During this study, when there is a safety evaluation, the investigator or site staff will  
4884 be responsible for detecting AEs and SAEs, as detailed in this section of the protocol.

---

4885 **16.3.1 Definition of an Adverse Event (AE)**

4886 Adverse events (AE) will be defined as “any untoward medical occurrence in a  
4887 clinical trial subject undergoing any intervention in the trial, which does not  
4888 necessarily have a causal relationship with this treatment”.

4889

4890 Only adverse events specific to biopsy-related complications including pain, fever,  
4891 hematuria, hematochezia, hematospermia, urinary retention and urinary  
4892 incontinence will be recorded. Any other adverse events will not be recorded. Please  
4893 refer to section 16.3.6 of the protocol.

4894 **16.3.2 Definition of a Serious Adverse Event (SAE)**

4895 Serious adverse events (SAE) will be defined as “any untoward medical occurrence as  
4896 a result of any intervention in the trial that:

4897 **(a) results in death**

4898 **(b) is life-threatening**

4899 The term ‘life-threatening’ in the definition of ‘serious’ refers to an event in which  
4900 the subject was at risk of death at the time of the event. It does not refer to an  
4901 event, which hypothetically might have caused death, if it were more severe.

4902 **(c) requires hospitalisation or prolongation of existing hospitalisation**

4903 In general, hospitalization signifies that the subject has been detained (usually  
4904 involving at least an overnight stay) at a hospital or emergency ward for observation  
4905 and/or treatment that would not have been appropriate in the physicians’ office or  
4906 outpatient setting. Complications that occur during hospitalization are AEs. If a  
4907 complication prolongs hospitalization or fulfils any other serious criteria, the event is  
4908 serious. When in doubt as to whether ‘hospitalization’; occurred or was necessary,  
4909 the AE should be considered serious. Hospitalization for elective treatment of a pre-  
4910 existing condition that did not worsen from baseline is not considered an AE.

4911 **(d) results in disability / incapacity**

4912 The term disability means substantial disruption of a person’s ability to conduct  
4913 normal life functions. This definition is not intended to include experiences of  
4914 relatively minor medical significance such as uncomplicated headache, nausea,  
4915 vomiting, diarrhea, influenza and accidental trauma (e.g. sprained ankle) which may  
4916 interfere or prevent everyday life functions but do not constitute a substantial  
4917 disruption.

4918 **(e) is a congenital abnormality/birth defect.**

4919 Medical or scientific judgement should be exercised in deciding whether reporting is  
4920 appropriate in other situations, such as important medical events that may not be  
4921 immediately life threatening or result in death or hospitalization but may jeopardise  
4922 the subject or may require medical or surgical intervention to prevent one of the  
4923 outcomes listed in the above definition. These should also be considered serious.

4924 Examples of such events are invasive or malignant cancers, intensive treatment in an  
4925 emergency room or at home for allergic bronchospasm, blood dyscrasias or  
4926 convulsions that do not result in hospitalization, or development of drug  
4927 dependence or drug abuse.

---

4928 **16.3.3 Disease-Related Events or Outcomes Not Qualifying as SAEs**

4929 An event which is part of the natural course of the disease under study (i.e., disease  
4930 progression) does not need to be reported as a serious adverse event. Progression of  
4931 the subject's neoplasia will be recorded in the clinical assessments in the CRF. Death  
4932 due to progressive disease is to be recorded on 'Record of Death' CRF page and not  
4933 as an SAE. However, if the progression of the underlying disease is greater than that  
4934 which would normally be expected for the subject, or if the investigator considers  
4935 that there was a causal relationship between treatment with study medication or  
4936 protocol design/procedures and the disease progression, then this must be reported  
4937 as an SAE. Any new primary cancer must be reported as an SAE.

4938 **16.3.4 Lack of Efficacy**

4939 "Lack of efficacy" will not be reported as an AE. The signs and symptoms or clinical  
4940 sequelae resulting from lack of efficacy will be reported if they fulfill the AE or SAE  
4941 definition (including clarifications).

4942 **16.3.5 Clinical Laboratory Abnormalities and Other Abnormal**  
4943 **Assessments as AEs and SAEs**

4944 Abnormal laboratory findings or other abnormal assessments that are judged by the  
4945 investigator as **clinically significant** (CS) will be recorded as AEs or SAEs if they meet  
4946 the definition of an AE or SAE. Clinically significant abnormal laboratory findings or  
4947 other abnormal assessments that are detected during the study or are present at  
4948 baseline and significantly worsen following the start of the study will be reported as  
4949 AEs or SAEs. However, clinically significant abnormal findings or other abnormal  
4950 assessments that are associated with the disease being studied, unless judged by the  
4951 investigator as more severe than expected for the subject's condition or that are  
4952 present or detected at the start of the study and do not worsen, will not be reported  
4953 as AEs or SAEs.

4954  
4955 The trial interventions are routinely carried out in clinical practice for investigation of  
4956 suspected cancer and the risks of the interventions are therefore not any greater  
4957 than if a man was not part of the trial. The risks of the procedures are relatively low,  
4958 as detailed in Section 11.

4959  
4960 The investigator will exercise his or her medical and scientific judgment in deciding  
4961 whether an abnormal laboratory finding or other abnormal assessment is clinically  
4962 significant.

4963 **16.3.6 Recording/Reporting AEs and SAEs**

4964 The first AE reporting period for this study begins at randomization and  
4965 will be recorded until 30-days post-biopsy. In the event that the subject does not  
4966 undergo biopsy, AEs and SAEs should be recorded until 30-days post MRI.

4967  
4968 Only adverse events specific to biopsy-related complications including pain, fever,  
4969 hematuria, hematochezia, hematospermia, urinary retention and urinary  
4970 incontinence will be recorded. Any other adverse events will not be recorded.  
4971

---

4972 AEs will be recorded by a member of the research team or clinical team on an AE  
4973 report form. All SAEs must be recorded on a SAE report form. Completed AEs and  
4974 SAE report forms should be sent to the CTG who will keep a log of AEs and SAEs. AE  
4975 and SAE logs will be reviewed by the DSMC.

4976  
4977 For the purposes of this study, only those AEs deemed POSSIBLY, PROBABLY, or  
4978 DEFINITELY related to the study procedures (ie, MRI or biopsy), or meets the criteria  
4979 as a SAE, will be collected and reported.

4980  
4981 Expected AEs includes the following:

- 4982 • Pain
- 4983 • Blood in the urine
- 4984 • Blood in the semen
- 4985 • Blood in the stool or back passage
- 4986 • Erectile dysfunction
- 4987 • Urinary incontinence
- 4988 • Urinary tract infection
- 4989 • Fevers

4990  
4991 In addition, small risks of allergic reactions are associated with the intravenous  
4992 administration of gadolinium, the contrast agent used in MRI scans, as described in  
4993 section 10.18.1.2. This contrast agent is used consistently in MRI scanning and is not  
4994 limited to this trial.

4995  
4996 If any of these symptoms are accompanied by events consistent with the definition  
4997 of an SAE as specified above, then the event will be considered an SAE.

4998  
4999 The Trial Coordinator, Principle Investigator or Chief Investigator should be informed  
5000 of any SAE within 24 hours.

5001 All SAE report forms must be completed and the SAE logs updated. All SAEs must be  
5002 followed up until a resolution is reached (i.e. recovered, recovering, recovered with  
5003 sequelae, fatal, not recovered or unknown).

5004  
5005 Local sites may have specific institutional protocols for reporting SAEs, which should  
5006 be followed in addition.

5007  
5008 When an AE/SAE occurs, it is the responsibility of the investigator to review all  
5009 documentation relative to the event. The investigator will then record all relevant  
5010 information regarding an AE/SAE on the CRF.

5011  
5012 The investigator will attempt to establish a diagnosis of the event based on signs,  
5013 symptoms and/or other clinical information. In such cases, the diagnosis should be  
5014 documented as the AE/SAE and not the individual signs/symptoms.

### 5015 **16.3.7 Evaluating AEs and SAEs**

#### 5016 **16.3.7.1 Assessment of Intensity**

5017

---

5018

5019

5020 The investigator will make an assessment of intensity for each AE and SAE reported  
5021 during the study. Degree of severity and change in severity will be recorded by  
5022 means of National Cancer Institute, Common Terminology Criteria for Adverse  
5023 Events (NCI CTCAE), version 4.03.

5024

5025 If the event is not listed in the NCI CTCAE (v.4.03), the assessment will be based on  
5026 the investigator's clinical judgment. The intensity of each AE and SAE recorded in the  
5027 CRF should be assigned to one of the following categories:

5028

5029 **Mild:** An event that is easily tolerated by the subject, causing minimal discomfort  
5030 and not interfering with everyday activities.

5031 **Moderate:** An event that is sufficiently discomforting to interfere with normal  
5032 everyday activities.

5033 **Severe:** An event that prevents normal everyday activities.

5034

5035 An event that is classified as severe should not be confused with a SAE. Severity is a  
5036 category utilized for rating the intensity of an event; both AEs and SAEs can be  
5037 assessed as severe.

#### 5038 **16.3.7.2 Assessment of Causality**

5039 The investigator is obligated to assess the relationship between investigational  
5040 product and the occurrence of each AE/SAE. The investigator will use clinical  
5041 judgment to determine the relationship. Alternative causes and the temporal  
5042 relationship of the event to the investigational product will be considered and  
5043 investigated. The investigator will also consult the CIB and or Product Information,  
5044 for marketed products, in the determination of his/her assessment.

#### 5045 **16.3.8 Follow-up of AEs and SAEs**

5046 After the initial AE/SAE report, the investigator is required to proactively follow each  
5047 subject and provide further information to the PI of the study, on the subject's  
5048 condition.

5049

5050 All AEs and SAEs documented at a previous visit/contact and are ongoing, will be  
5051 reviewed at subsequent visits/contacts.

5052

5053 All AEs and SAEs will be followed until resolution, until the condition stabilizes, until  
5054 the event is otherwise explained or until the subject is lost to follow-up. Once  
5055 resolved, the appropriate AE/SAE CRF page(s) will be updated. The investigator will  
5056 ensure that follow-up includes any supplemental investigations as may be indicated  
5057 to elucidate the nature and/or causality of the AE or SAE.

5058

5059 The PI may request that the investigator perform or arrange for the conduct of  
5060 supplemental measurements and/or evaluations to elucidate as fully as possible the  
5061 nature and/or causality of the AE or SAE. The investigator is obligated to assist. If a  
5062 subject dies during participation in the study or during a recognized follow-up  
5063 period, the PI will be provided with any post-mortem findings.

---

5064  
5065 New or updated information will be recorded on the originally completed SAE CRF,  
5066 with all changes signed and dated by the investigator or designate. The updated SAE  
5067 CRF should be resent to the PI.

### 5068 **16.3.9 Prompt Reporting of SAEs**

5069 Once the investigator determines that an event meets the protocol definition of an  
5070 SAE, the SAE will be reported to the PI (CURC) within 24 hours.  
5071

#### 5072 **16.3.9.1 Responsibility for Reporting Serious Adverse Events to PI**

5073 The Site Investigator must immediately inform the PI (CURC) of all SAE (within 24  
5074 hours) at the following fax number: 1-416-480-6121.

5075  
5076 The PI contact list for SAE receipt, fax numbers, telephone numbers and mailing  
5077 addresses is as follows:

5078 Dr. Laurence Klotz  
5079 c/o Marlene Kebabdjian  
5080 Sunnybrook Health Sciences Centre  
5081 2075 Bayview Avenue A304  
5082 Toronto, Ontario M4N 3M5 Canada  
5083 Phone: (416) 480-6100 ext 2890  
5084 E-mail: [Laurence.Klotz@sunnybrook.ca](mailto:Laurence.Klotz@sunnybrook.ca)  
5085 [Marlene.kebabdjian@sunnybrook.ca](mailto:Marlene.kebabdjian@sunnybrook.ca)

#### 5086 **16.3.9.2 Completion and Transmission of the SAE Reports**

5087 Once an investigator becomes aware that an SAE has occurred in a study subject,  
5088 she/he will report the information to the PI within 24 hours. The SAE CRF will always  
5089 be completed as thoroughly as possible with all available details of the event, signed  
5090 by the investigator (or designee), and forwarded to the PI within the designated time  
5091 frames. If the investigator does not have all information regarding as SAE, he/she will  
5092 not wait to receive additional information before notifying the PI of the event and  
5093 completing the form. The form will be updated when additional information is  
5094 received.

5095  
5096 The investigator will always provide an assessment of causality at the time of the  
5097 initial report as described in Section 16.3.6.2.

### 5098 **16.3.10 Post-study AEs and SAEs**

5099 If the investigator learns of any SAE at any time after a subject has been discharged  
5100 from the study, and such event(s) is (are) reasonably related to the study  
5101 intervention, the investigator should promptly notify the PI (CURC).  
5102



---

5103 **17. Study Administration**

5104 **17.1 Regulatory and Ethical Considerations**

5105 An important consideration is that men are being randomized to one of two biopsy  
5106 techniques when it is not known which will be more effective in diagnosing clinically  
5107 significant prostate cancer. Both diagnostic tests are currently used in everyday  
5108 clinical practice at the institutions involved in the trial. Though systematic TRUS  
5109 guided biopsy could be considered standard of care, there is enough evidence to  
5110 support the concept that MPMRI-targeted biopsy may be as effective, if not more so,  
5111 than systematic TRUS guided biopsy[27]. This study aims to confirm this.

5112 **17.1.1 Ethical Conduct of the Study and Ethics Approval**

5113 The PI and each participating site will obtain approval to conduct the study from the  
5114 Research Ethics Board (REB) prior to initiating the study.

5115

5116 Participating sites from Ontario will use the Ontario Cancer Research Ethics Board  
5117 (OCREB) as their Board of Record.

5118 This study will be conducted in accordance with 'good clinical practice' (GCP) and all  
5119 applicable regulatory requirements, including where applicable, the 2013 version of  
5120 the Declaration of Helsinki.

5121

5122 The investigator is responsible for ensuring that this protocol, the site's informed  
5123 consent form and any other information that will be present to potential subjects  
5124 are reviewed and approved by the appropriate REB. The investigator agrees to allow  
5125 the REB direct access to all relevant regulatory documents. The PI will provide the  
5126 site investigator(s) with relevant document(s)/data that are needed for REB review  
5127 and approval of the study. Before CRFs can be shipped to the site, the PI must  
5128 receive copies of the REB approval, the approved informed consent form and any  
5129 other information that the REB has approved for presentation to potential subjects.

5130

5131 If the protocol, the informed consent form or any other information that the REB has  
5132 approved for presentation to potential subjects is amended during the study, the  
5133 site investigator(s) is responsible for ensuring the REB reviews and approves, where  
5134 applicable, these amended documents. The site investigator(s) must follow all  
5135 applicable regulatory requirements pertaining to the use of an amended informed  
5136 consent form including obtaining the REB approval of the amended form before new  
5137 subjects consent to take part in the study using this version of the form. Copies of  
5138 the REB approval of the amended informed consent form/other information and the  
5139 approved amended informed consent form/other information must be forwarded to  
5140 the PI promptly.

5141 **17.1.2 Informed Consent**

5142 Informed consent will be obtained before the subject can participate in the study.  
5143 The contents and process of obtaining informed consent will be in accordance with  
5144 all applicable regulatory requirements.

5145

---

5146 The subject's consent to participate in the study should be obtained after a full  
5147 explanation has been provided of the procedures to be given. Subjects should be  
5148 given sufficient time (at least 24 hours) after being given the study subject  
5149 information sheet to consider and discuss participation in the study with family and  
5150 friends.

5151  
5152 A contact number will be given to the subject should he wish to discuss any aspect of  
5153 the study. Following this, the clinician will determine that the subject is fully  
5154 informed of the study and their participation, in accordance with Good Clinical  
5155 Practice Guidelines. Subjects will always be asked to sign a consent form. One copy  
5156 will be given to the subject, one copy will be kept with subject's hospital notes and  
5157 one copy should be kept in the local investigator's file.

### 5158 **17.1.3 Investigator Reporting Requirements**

5159 The investigator is responsible for reporting SAEs to the REB in accordance with all  
5160 applicable regulations. Furthermore, the investigator may be required to provide  
5161 periodic safety updates on the conduct of the study at his or her site and notification  
5162 of study closure to the REB.

### 5163 **17.2 Study Monitoring**

5164 This study will be monitored by a CRA. The CRA will contact the sites by telephone  
5165 on a predetermined basis and would conduct a monitoring visits based on the data  
5166 entered in the EDC and queries.

5167  
5168 During these contacts, the monitor will:

- 5169 • Check the progress of the study
- 5170 • Review study data collected
- 5171 • Conduct source document verification
- 5172 • Identify any issues and address their resolution

5173

5174 This will be done in order to verify that the:

- 5175 • Data are authentic, accurate and complete
- 5176 • Safety and rights of subjects are being protected
- 5177 • Study is conducted in accordance with the currently approved protocol (and  
5178 any amendments), GCP and all applicable regulatory requirements

5179

5180 The investigator agrees to allow CRA personnel direct access to all relevant  
5181 documents and to allocate his/her time and the time of his/her staff to CRA  
5182 personnel to discuss findings and any relevant issues.

### 5183 **17.3 Quality Assurance**

5184 To ensure compliance with GCP and all applicable regulatory requirements,  
5185 regulatory agencies may conduct a regulatory inspection of the study. Such  
5186 audits/inspections can occur at any time during or after completion of the study. If  
5187 an audit or inspection occurs, the investigator and institution agree to allow the  
5188 auditor/inspector direct access to all relevant documents and to allocate his/her

---

5189 time and the time of his/her staff to the auditory/inspector to discuss findings and  
5190 any relevant issues.

#### 5191 **17.4 Study and Site Closure**

5192 Upon completion of the study, the site investigator(s) will conduct the following  
5193 activities:

- 5194 • Return of all study data to the Sponsor (CURC)
- 5195 • Submission of all study data and data queries to OCOG
- 5196 • Review of site study records for completeness

5197

5198 In addition, the Principal Investigator has the right to temporarily suspend or  
5199 prematurely discontinue this study either at a single site or at all sites at any time for  
5200 reasons including but not limited to, safety or ethical issues or severe non-  
5201 compliance. If the PI determines such action is needed, the PI will discuss this with  
5202 the site investigator (including the reasons for taking such action) at that time. When  
5203 feasible, the PI will provide advance notification to the site investigator of the  
5204 impending action prior to it taking effect.

5205

5206 Individual site Investigators may also terminate their participation in the study at any  
5207 time. If the investigator determines such action is needed, the investigator will  
5208 discuss this with the PI(including the reasons for taking such action) at that time.  
5209 When feasible, the investigator will provide advance notification to the PI of the  
5210 impending action prior to it taking effect.

5211

5212 The PI will promptly inform all other investigators and/or institutions conducting the  
5213 study if the study is suspended or terminated for safety reasons and will also inform  
5214 the regulatory authorities of the suspension or termination of the study and the  
5215 reason(s) for the action. If required by applicable regulations, the investigator must  
5216 inform the REB promptly and provide the reason for the suspension or termination.

5217

5218 If the study is prematurely discontinued, all study data must be returned to the PI. In  
5219 addition, the investigator has the responsibility to return any used/unused clinical  
5220 supplies.

5221

5222 Financial compensation to investigators and/or institutions will be in accordance  
5223 with the agreement established between the investigator and the PI.

#### 5224 **17.5 Records Retention**

5225 Following closure of the study, the site investigator(s) must maintain all site study  
5226 records in a safe and secure location. The records must be maintained to allow easy  
5227 and timely retrieval when needed and whenever feasible, to allow any subsequent  
5228 review of data in conjunction with assessment of the facility, supporting systems and  
5229 staff.

5230

5231 The site investigator(s) will retain study records to comply with all applicable  
5232 regulatory requirements. The minimum retention time will meet the strictest  
5233 standard applicable to that site for the study as dictated by any institutional

---

5234 requirements or local laws or regulations of Health Canada standards/procedures;  
5235 otherwise, the retention period will default to 25 years.

5236

5237 The site investigator(s) must inform the PI of any changes in the archival  
5238 arrangements, including but not limited to the following: archival at an off-site  
5239 facility, transfer of ownership of the records in the event the investigator leaves the  
5240 site. The PI should be informed of this change if it affects their access to the  
5241 information in case of an audit.

## 5242 **17.6 Data Management**

5243 Subject data are collected by the investigator or designee using the CRF within an  
5244 Electronic Data Capture (EDC) system. Subject data necessary for analysis and  
5245 reporting will be entered/transmitted into a validated database. Clinical data  
5246 management will be performed in accordance with applicable standards and data  
5247 cleaning procedures. Database lock will occur when data management quality  
5248 control procedures are completed.

## 5249 **17.7 Publication**

5250 The results from the study will be analyzed and published as soon as possible and is  
5251 appropriate. All study-related communications can only be presented or published  
5252 after approval from all relevant members involved in the trial.

5253

5254 All publications shall include appropriate indication named authors as agreed on by  
5255 the members involved in the trial. For the main study reports, senior and first  
5256 authorship will be determined by agreement of the Chief Investigator, the Principle  
5257 Investigator at time of manuscript drafting. Authorship will be based on  
5258 recommendations of the International Committee of Medical Journal Editors  
5259 ([www.ICMJE.org](http://www.ICMJE.org)) where all authors meet the following for criteria:

5260

- 5261 5. Substantial contributions to the conception or design of the work; or the  
5262 acquisition, analysis, or interpretation of data for the work; AND
- 5263 6. Drafting the work or revising it critically for important intellectual content;  
5264 AND
- 5265 7. Final approval of the version to be published; AND
- 5266 8. Agreement to be accountable for all aspects of the work in ensuring that  
5267 questions related to the accuracy or integrity of any part of the work are  
5268 appropriately investigated and resolved.

5269

5270 If there are no named authors (i.e. group authorship) then a writing committee will  
5271 be identified that would usually include these people. The clinical trials.gov  
5272 registration number that will be allocated to this trial will be attached to any  
5273 publications resulting from this trial.

5274

5275 Trial funding agencies (OICR, PCC and collaborators as appropriate) will be  
5276 acknowledged in all publications.

5277

---

5278 The members of the trial steering committee will be listed with their affiliations in  
5279 the acknowledgements/appendix of the main publication.  
5280  
5281

5282  
5283  
5284  
5285  
5286  
5287  
5288  
5289  
5290  
5291  
5292  
5293  
5294  
5295  
5296  
5297  
5298  
5299  
5300  
5301  
5302  
5303  
5304  
5305  
5306  
5307  
5308  
5309  
5310  
5311  
5312  
5313  
5314  
5315  
5316  
5317  
5318  
5319  
5320  
5321  
5322  
5323  
5324  
5325

---

## 18. References

1. Cooperberg MR, Carroll PR, Klotz L: **Active surveillance for prostate cancer: progress and promise.** *Journal of clinical oncology : official journal of the American Society of Clinical Oncology* 2011, **29**(27):3669-3676.
2. **PI-RADS(TM) Prostate Imaging – Reporting and Data System V.2.** In.: American College of Radiology; 2015.
3. Dickinson L, Ahmed HU, Allen C, Barentsz JO, Carey B, Futterer JJ, Heijmink SW, Hoskin PJ, Kirkham A, Padhani AR *et al*: **Magnetic resonance imaging for the detection, localisation, and characterisation of prostate cancer: recommendations from a European consensus meeting.** *Eur Urol* 2011, **59**(4):477-494.
4. Heidenreich A, Bastian PJ, Bellmunt J, Bolla M, Joniau S, van der Kwast T, Mason M, Matveev V, Wiegel T, Zattoni F *et al*: **EAU guidelines on prostate cancer. part 1: screening, diagnosis, and local treatment with curative intent-update 2013.** *Eur Urol* 2014, **65**(1):124-137.
5. Center MM, Jemal A, Lortet-Tieulent J, Ward E, Ferlay J, Brawley O, Bray F: **International variation in prostate cancer incidence and mortality rates.** *Eur Urol* 2012, **61**(6):1079-1092.
6. **American Cancer Society Prostate Cancer Key Statistics.** Accessed 1st November 2014. Accessed from: <http://www.cancer.org/cancer/prostatecancer/detailedguide/prostate-cancer-key-statistics>[<http://www.cancer.org/cancer/prostatecancer/detailedguide/prostate-cancer-key-statistics>]
7. Loeb S, Heuvel vD, Zhu X, Bangma CH, Schroder FH, Roobol MJ: **Reply from Authors re: Alexandre R. Zlotta, Robert K. Nam. To Biopsy or Not to Biopsy: Thou Shall Think Twice.** *Eur Urol* 2012;**61**:11157. *European urology* 2012, **61**(6):1117-1118.
8. Stamey TA, Freiha FS, McNeal JE, Redwine EA, Whittemore AS, Schmid HP: **Localized prostate cancer. Relationship of tumor volume to clinical significance for treatment of prostate cancer.** *Cancer* 1993, **71**(3 Suppl):933-938.
9. Ahmed HU, Hu Y, Carter T, Arumainayagam N, Lecornet E, Freeman A, Hawkes D, Barratt DC, Emberton M: **Characterizing clinically significant prostate cancer using template prostate mapping biopsy.** *J Urol* 2011, **186**(2):458-464.
10. Netto GJ: **Tumor volume threshold of insignificant prostate cancer--was Dr. Stamey right all along?***J Urol* 2011, **185**(1):10-11.
11. Mowatt G, Scotland G, Boachie C, Cruickshank M, Ford JA, Fraser C, Kurban L, Lam TB, Padhani AR, Royle J *et al*: **The diagnostic accuracy and cost-effectiveness of magnetic resonance spectroscopy and enhanced magnetic resonance imaging techniques in aiding the**

- 
- 5326 **localisation of prostate abnormalities for biopsy: a systematic review**  
5327 **and economic evaluation.** *Health technology assessment* 2013,  
5328 **17(20):vii-xix, 1-281.**
- 5329 12. Morash C, Tey R, Agbassi C, Klotz L, McGowan T, Srigley J, Evans A:  
5330 **Active surveillance for the management of localized prostate cancer:**  
5331 **Guideline recommendations.** *Canadian Urological Association journal =*  
5332 *Journal de l'Association des urologues du Canada* 2015, **9(5-6):171-178.**
- 5333 13. Wilt TJ, Brawer MK, Jones KM, Barry MJ, Aronson WJ, Fox S, Gingrich  
5334 JR, Wei JT, Gilhooly P, Grob BM *et al*: **Radical prostatectomy versus**  
5335 **observation for localized prostate cancer.** *N Engl J Med* 2012,  
5336 **367(3):203-213.**
- 5337 14. Litwin MS, Lubeck DP, Spitalny GM, Henning JM, Carroll PR: **Mental**  
5338 **health in men treated for early stage prostate carcinoma: a**  
5339 **posttreatment, longitudinal quality of life analysis from the Cancer of**  
5340 **the Prostate Strategic Urologic Research Endeavor.** *Cancer* 2002,  
5341 **95(1):54-60.**
- 5342 15. Dall'Era MA, Albertsen PC, Bangma C, Carroll PR, Carter HB, Cooperberg  
5343 MR, Freedland SJ, Klotz LH, Parker C, Soloway MS: **Active surveillance**  
5344 **for prostate cancer: a systematic review of the literature.** *Eur Urol*  
5345 2012, **62(6):976-983.**
- 5346 16. Wilt TJ, MacDonald R, Rutks I, Shamliyan TA, Taylor BC, Kane RL:  
5347 **Systematic review: comparative effectiveness and harms of**  
5348 **treatments for clinically localized prostate cancer.** *Annals of internal*  
5349 *medicine* 2008, **148(6):435-448.**
- 5350 17. **CG58 Prostate cancer: NICE guidance**  
5351 [<http://guidance.nice.org.uk/CG58/NICEGuidance/pdf/English>]
- 5352 18. Nevoux P, Ouzzane A, Ahmed HU, Emberton M, Montironi R, Presti Jr  
5353 JC, Villers A: **Quantitative tissue analyses of prostate cancer foci in an**  
5354 **unselected cystoprostatectomy series.** *BJU Int* 2011.
- 5355 19. Sedelaar JP, Vijverberg PL, De Reijke TM, de la Rosette JJ, Kil PJ,  
5356 Braeckman JG, Hendriks AJ: **Transrectal ultrasound in the diagnosis of**  
5357 **prostate cancer: state of the art and perspectives.** *Eur Urol* 2001,  
5358 **40(3):275-284.**
- 5359 20. Scattoni V, Zlotta A, Montironi R, Schulman C, Rigatti P, Montorsi F:  
5360 **Extended and saturation prostatic biopsy in the diagnosis and**  
5361 **characterisation of prostate cancer: a critical analysis of the literature.**  
5362 *Eur Urol* 2007, **52(5):1309-1322.**
- 5363 21. Djavan B, Ravery V, Zlotta A, Dobronski P, Dobrovits M, Fakhari M, Seitz  
5364 C, Susani M, Borkowski A, Boccon-Gibod L *et al*: **Prospective evaluation**  
5365 **of prostate cancer detected on biopsies 1, 2, 3 and 4: when should we**  
5366 **stop?** *J Urol* 2001, **166(5):1679-1683.**
- 5367 22. Ahmed HU, Kirkham A, Arya M, Illing R, Freeman A, Allen C, Emberton  
5368 M: **Is it time to consider a role for MRI before prostate biopsy?** *Nat Rev*  
5369 *Clin Oncol* 2009, **6(4):197-206.**

- 
- 5370 23. Bossuyt PM, Reitsma JB, Bruns DE, Gatsonis CA, Glasziou PP, Irwig LM,  
5371 Lijmer JG, Moher D, Rennie D, de Vet HC: **Towards complete and**  
5372 **accurate reporting of studies of diagnostic accuracy: the STARD**  
5373 **initiative.** *Clin Radiol* 2003, **58**(8):575-580.
- 5374 24. White S, Hricak H, Forstner R, Kurhanewicz J, Vigneron DB, Zaloudek CJ,  
5375 Weiss JM, Narayan P, Carroll PR: **Prostate cancer: effect of postbiopsy**  
5376 **hemorrhage on interpretation of MR images.** *Radiology* 1995,  
5377 **195**(2):385-390.
- 5378 25. Tanimoto A, Nakashima J, Kohno H, Shinmoto H, Kuribayashi S:  
5379 **Prostate cancer screening: the clinical value of diffusion-weighted**  
5380 **imaging and dynamic MR imaging in combination with T2-weighted**  
5381 **imaging.** *J Magn Reson Imaging* 2007, **25**(1):146-152.
- 5382 26. Kirkham AP, Emberton M, Allen C: **How good is MRI at detecting and**  
5383 **characterising cancer within the prostate?***Eur Urol* 2006, **50**(6):1163-  
5384 1174; discussion 1175.
- 5385 27. Moore CM, Robertson NL, Arsanious N, Middleton T, Villers A, Klotz L,  
5386 Taneja SS, Emberton M: **Image-guided prostate biopsy using magnetic**  
5387 **resonance imaging-derived targets: a systematic review.** *Eur Urol*  
5388 2013, **63**(1):125-140.
- 5389 28. Villers A, Puech P, Mouton D, Leroy X, Ballereau C, Lemaitre L: **Dynamic**  
5390 **contrast enhanced, pelvic phased array magnetic resonance imaging**  
5391 **of localized prostate cancer for predicting tumor volume: correlation**  
5392 **with radical prostatectomy findings.** *J Urol* 2006, **176**(6 Pt 1):2432-  
5393 2437.
- 5394 29. Wu LM, Xu JR, Ye YQ, Lu Q, Hu JN: **The clinical value of diffusion-**  
5395 **weighted imaging in combination with T2-weighted imaging in**  
5396 **diagnosing prostate carcinoma: a systematic review and meta-**  
5397 **analysis.** *AJR Am J Roentgenol* 2012, **199**(1):103-110.
- 5398 30. Wu LM, Xu JR, Gu HY, Hua J, Chen J, Zhang W, Zhu J, Ye YQ, Hu J:  
5399 **Usefulness of diffusion-weighted magnetic resonance imaging in the**  
5400 **diagnosis of prostate cancer.** *Acad Radiol* 2012, **19**(10):1215-1224.
- 5401 31. Umbehr M, Bachmann LM, Held U, Kessler TM, Sulser T, Weishaupt D,  
5402 Kurhanewicz J, Steurer J: **Combined magnetic resonance imaging and**  
5403 **magnetic resonance spectroscopy imaging in the diagnosis of prostate**  
5404 **cancer: a systematic review and meta-analysis.** *Eur Urol* 2009,  
5405 **55**(3):575-590.
- 5406 32. Yamamoto T, Musunuru B, Vesprini D, Zhang L, Ghanem G, Loblaw A,  
5407 Klotz L: **Metastatic Prostate Cancer in Men Initially Managed with**  
5408 **Active Surveillance.** *The Journal of urology* 2015.
- 5409 33. Klotz L, Vesprini D, Sethukavalan P, Jethava V, Zhang L, Jain S,  
5410 Yamamoto T, Mamedov A, Loblaw A: **Long-term follow-up of a large**  
5411 **active surveillance cohort of patients with prostate cancer.** *Journal of*  
5412 *clinical oncology : official journal of the American Society of Clinical*  
5413 *Oncology* 2015, **33**(3):272-277.



- 
- 5414 34. Hoeks CM, Somford DM, van Oort IM, Vergunst H, Oddens JR, Smits  
5415 GA, Roobol MJ, Bul M, Hambroek T, Witjes JA *et al*: **Value of 3-T**  
5416 **Multiparametric Magnetic Resonance Imaging and Magnetic**  
5417 **Resonance-Guided Biopsy for Early Risk Restratification in Active**  
5418 **Surveillance of Low-Risk Prostate Cancer: A Prospective Multicenter**  
5419 **Cohort Study.** *Invest Radiol* 2013.
- 5420 35. Abd-Alazeez M, Ahmed HU, Arya M, Charman SC, Anastasiadis E,  
5421 Freeman A, Emberton M, Kirkham A: **The accuracy of multiparametric**  
5422 **MRI in men with negative biopsy and elevated PSA level-Can it rule**  
5423 **out clinically significant prostate cancer?***Urol Oncol* 2013.
- 5424 36. Kasivisvanathan V, Dufour R, Moore CM, Ahmed HU, Abd-Alazeez M,  
5425 Charman SC, Freeman A, Allen C, Kirkham A, van der Meulen J *et al*:  
5426 **Transperineal magnetic resonance image-targeted prostate biopsy**  
5427 **versus transperineal template prostate biopsy in the detection of**  
5428 **clinically significant prostate cancer.** *J Urol* 2012.
- 5429 37. Haffner J, Lemaitre L, Puech P, Haber GP, Leroy X, Jones JS, Villers A:  
5430 **Role of magnetic resonance imaging before initial biopsy: comparison**  
5431 **of magnetic resonance imaging-targeted and systematic biopsy for**  
5432 **significant prostate cancer detection.** *BJU Int* 2011, **108**(8 Pt 2):E171-  
5433 178.
- 5434 38. Siddiqui MM, Rais-Bahrami S, Turkbey B, George AK, Rothwax J, Shakir  
5435 N, Okoro C, Raskolnikov D, Parnes HL, Linehan WM *et al*: **Comparison**  
5436 **of MR/ultrasound fusion-guided biopsy with ultrasound-guided**  
5437 **biopsy for the diagnosis of prostate cancer.** *Jama* 2015, **313**(4):390-  
5438 397.
- 5439 39. Rosario DJ, Lane JA, Metcalfe C, Donovan JL, Doble A, Goodwin L, Davis  
5440 M, Catto JW, Avery K, Neal DE *et al*: **Short term outcomes of prostate**  
5441 **biopsy in men tested for cancer by prostate specific antigen:**  
5442 **prospective evaluation within ProtecT study.** *BMJ* 2012, **344**:d7894.
- 5443 40. Siddiqui MM, Rais-Bahrami S, Truong H, Stamatakis L, Vourganti S, Nix  
5444 J, Hoang AN, Walton-Diaz A, Shuch B, Weintraub M *et al*: **Magnetic**  
5445 **Resonance Imaging/Ultrasound-Fusion Biopsy Significantly Upgrades**  
5446 **Prostate Cancer Versus Systematic 12-core Transrectal Ultrasound**  
5447 **Biopsy.** *Eur Urol* 2013.
- 5448 41. Wysock JS, Rosenkrantz AB, Huang WC, Stifelman MD, Lepor H, Deng  
5449 FM, Melamed J, Taneja SS: **A Prospective, Blinded Comparison of**  
5450 **Magnetic Resonance (MR) Imaging-Ultrasound Fusion and Visual**  
5451 **Estimation in the Performance of MR-targeted Prostate Biopsy: The**  
5452 **PROFUS Trial.** *Eur Urol* 2013.
- 5453 42. **Undertaking a transrectal ultrasound guided biopsy of the prostate.**  
5454 **Public Health England Prostate Cancer Risk Management Programme**  
5455 **Guidelines.** [http://www.cancerscreening.nhs.uk/prostate/pcrmp-guide-](http://www.cancerscreening.nhs.uk/prostate/pcrmp-guide-1.html)  
5456 [1.html](http://www.cancerscreening.nhs.uk/prostate/pcrmp-guide-1.html) [<http://www.cancerscreening.nhs.uk/prostate/pcrmp-guide-1.html>]

- 
- 5457 43. Epstein JI, Allsbrook WC, Jr., Amin MB, Egevad LL, Committee IG: **The**  
5458 **2005 International Society of Urological Pathology (ISUP) Consensus**  
5459 **Conference on Gleason Grading of Prostatic Carcinoma.** *The American*  
5460 *journal of surgical pathology* 2005, **29**(9):1228-1242.
- 5461 44. Cullen J, Rosner IL, Brand TC, Zhang N, Tsiatis AC, Moncur J, Ali A, Chen  
5462 Y, Knezevic D, Maddala T *et al*: **A Biopsy-based 17-gene Genomic**  
5463 **Prostate Score Predicts Recurrence After Radical Prostatectomy and**  
5464 **Adverse Surgical Pathology in a Racially Diverse Population of Men**  
5465 **with Clinically Low- and Intermediate-risk Prostate Cancer.** *European*  
5466 *urology* 2015, **68**(1):123-131.
- 5467 45. Bryant RJ, Sjoberg DD, Vickers AJ, Robinson MC, Kumar R, Marsden L,  
5468 Davis M, Scardino PT, Donovan J, Neal DE *et al*: **Predicting High-Grade**  
5469 **Cancer at Ten-Core Prostate Biopsy Using Four Kallikrein Markers**  
5470 **Measured in Blood in the ProtecT Study.** *Journal of the National*  
5471 *Cancer Institute* 2015, **107**(7).
- 5472 46. Nam RK, Cheung P, Herschorn S, Saskin R, Su J, Klotz LH, Chang M,  
5473 Kulkarni GS, Lee Y, Kodama RT *et al*: **Incidence of complications other**  
5474 **than urinary incontinence or erectile dysfunction after radical**  
5475 **prostatectomy or radiotherapy for prostate cancer: a population-**  
5476 **based cohort study.** *The Lancet Oncology* 2014, **15**(2):223-231.
- 5477 47. Pocock SJ, Simon R: **Sequential treatment assignment with balancing**  
5478 **for prognostic factors in the controlled clinical trial.** *Biometrics* 1975,  
5479 **31**(1):103-115.
- 5480 48. Moore CM, Kasivisvanathan V, Eggener S, Emberton M, Futterer JJ, Gill  
5481 IS, Grubb lii RL, Hadaschik B, Klotz L, Margolis DJ *et al*: **Standards of**  
5482 **Reporting for MRI-targeted Biopsy Studies (START) of the Prostate:**  
5483 **Recommendations from an International Working Group.** *Eur Urol*  
5484 2013, **64**(4):544-552.
- 5485 49. Presti JC, Jr.: **Prostate biopsy: how many cores are enough?** *Urologic*  
5486 *oncology* 2003, **21**(2):135-140.  
5487  
5488

5489 **Appendices**

5490 **Appendix 1: Time windows for data collection**

5491

5492 For the overall schedule of visits for each arm please see Section 9.3, Tables 1-3

5493 For details on time windows permitted for each trial intervention to be completed  
5494 please see Table 5 below.

5495

5496 Table 5: Details of time windows permitted for all trial interventions.

5497

| Contact and Purpose if not clear                                                                                                                                     | Time window permitted +/-30 days of scheduled visit                                                                                                                                                                                                                                                                                                                                                                                                  |
|----------------------------------------------------------------------------------------------------------------------------------------------------------------------|------------------------------------------------------------------------------------------------------------------------------------------------------------------------------------------------------------------------------------------------------------------------------------------------------------------------------------------------------------------------------------------------------------------------------------------------------|
| <b>Visit 1</b><br><br>Screening (eligibility review, med hx,)                                                                                                        | Any time following referral of subject.<br><br>Ideally perform as soon as possible following receipt of referral.                                                                                                                                                                                                                                                                                                                                    |
| <b>Visit 1</b><br><br>Consent<br><br>Vitals, DRE<br><br>Randomization<br><br>EQ-5D-5L Questionnaire (baseline)<br><br>Optional blood, urine, semen and tissue sample | Complete only once subject has had 24 hours after receiving the patient information to fully consider the study.<br><br>Ideally on same visit as screening.<br><br>Complete at screening<br><br>Immediately after consent form signed and eligibility is confirmed.<br><br>Complete immediately after consent form is signed<br><br>Complete after additional informed consent signed, after randomization and up until any point prior to a biopsy. |
| <b>Visit 2</b><br><br>MRI<br><br>EQ-5D-5L Questionnaire (post MRI)                                                                                                   | Only for men randomized to this arm.<br><br>Any time following randomization. Ideally within 1 week of randomization.<br><br>To be completed 24-48 hours post-MRI as previously explained                                                                                                                                                                                                                                                            |

|                                                                                                          |                                                                                                                                                                                                                                                                                                                                                                                                                                                                                                                                                                                                                                                                                     |
|----------------------------------------------------------------------------------------------------------|-------------------------------------------------------------------------------------------------------------------------------------------------------------------------------------------------------------------------------------------------------------------------------------------------------------------------------------------------------------------------------------------------------------------------------------------------------------------------------------------------------------------------------------------------------------------------------------------------------------------------------------------------------------------------------------|
|                                                                                                          |                                                                                                                                                                                                                                                                                                                                                                                                                                                                                                                                                                                                                                                                                     |
| <p><b>Visit 3</b></p> <p>MRI-Targeted Biopsy of Prostate</p>                                             | <p>Only for men randomized to this arm who have a lesion on MRI that needs a biopsy.</p> <p>Any time following the MRI being reported, ideally within 1 week of MRI.</p> <p>Depending on local Urology service structure, an appointment for a biopsy may need to be booked at the same time as the MRI is booked (i.e. immediately after randomization) in order for a slot to be secured for a biopsy to occur in timely fashion.</p> <p>If it is determined from the MRI that a biopsy is not required then the biopsy appointment can be used instead of Visit 4 for follow up of results and treatment decision.</p>                                                           |
| <p><b>Visit 3</b></p> <p>Systematic TRUS guided biopsy</p>                                               | <p>Only for men randomized to this arm.</p> <p>Any time following randomization. Ideally within 4 weeks of randomization.</p>                                                                                                                                                                                                                                                                                                                                                                                                                                                                                                                                                       |
| <p><b>Visit 3</b></p> <p>Immediate post-biopsy questionnaire</p> <p>30-day post-biopsy questionnaire</p> | <p>Should be completed and returned immediately after a biopsy, before the subject leaves the department. As long as questionnaire completed within 24 hours it will be acceptable.</p> <p>To be given to subject to take home after biopsy and completed as instructed on day 30 post-biopsy.</p> <p>To be returned by post or at follow up appointment (Visit 4).</p> <p>If Visit 4 is earlier than 30 days post biopsy then this questionnaire can be given to the research team when 30 days is finally complete.</p> <p>If Visit 4 is on or later than 30 days then this can be returned at the Visit 4 appointment.</p> <p>As long as questionnaire is completed at 30-60</p> |

|                                                                               |                                                                                                                                                                                                                                                                                                                                                                                                                                                                       |
|-------------------------------------------------------------------------------|-----------------------------------------------------------------------------------------------------------------------------------------------------------------------------------------------------------------------------------------------------------------------------------------------------------------------------------------------------------------------------------------------------------------------------------------------------------------------|
| Telephone reminder                                                            | <p>days post-biopsy, it will be acceptable. Ideally the questionnaire should be completed as close as possible to 30 days post-biopsy.</p> <p>At 30-days post biopsy a member of the research team will phone the subject to remind them to fill out the 30-day questionnaires</p>                                                                                                                                                                                    |
| <p><b>Visit 4</b></p> <p>Follow up for results<br/>And treatment Decision</p> | <p>Should be completed as soon as possible following the availability of any pathology results. Alternatively, if a man is in the MRI arm and the MRI is negative, this follow up should occur after the availability of the MRI report. Ideally the follow up appointment should be within 6 weeks of randomization.</p> <p>Depending on local Urology service structure, these results may need to be discussed at an MDT meeting to inform treatment decision.</p> |
| <p><b>Visit 5</b></p> <p><b>26 week follow up</b></p>                         | <ul style="list-style-type: none"> <li>• DRE</li> <li>• PSA</li> <li>• Optional blood, urine</li> </ul>                                                                                                                                                                                                                                                                                                                                                               |
| <p><b>Visit6</b></p> <p>1 year follow up<br/>52 week follow up visit</p>      | <p>The following information will be obtained on an annual basis:</p> <ul style="list-style-type: none"> <li>• time to cancer diagnosis;</li> <li>• Gleason score progression;</li> <li>• time to intervention on active surveillance;</li> <li>• time on active surveillance;</li> <li>• results of PSA tests.</li> <li>• results of any off protocol biopsies or MRI</li> <li>• optional sample collection (blood, urine)</li> </ul>                                |
| <p><b>Visit 7</b></p> <p><b>78 week follow up</b></p>                         | <ul style="list-style-type: none"> <li>• DRE</li> <li>• PSA</li> <li>• Optional blood, urine</li> </ul>                                                                                                                                                                                                                                                                                                                                                               |
|                                                                               |                                                                                                                                                                                                                                                                                                                                                                                                                                                                       |

|                                                       |                                                                                                                                                                                                                                                                                                                                                                                                                                                                                                                                                                                                                                                                                                                                                         |
|-------------------------------------------------------|---------------------------------------------------------------------------------------------------------------------------------------------------------------------------------------------------------------------------------------------------------------------------------------------------------------------------------------------------------------------------------------------------------------------------------------------------------------------------------------------------------------------------------------------------------------------------------------------------------------------------------------------------------------------------------------------------------------------------------------------------------|
| <p><b>Visit 8</b></p> <p>104 week follow up visit</p> | <p>The following information will be obtained on an annual basis:</p> <ul style="list-style-type: none"> <li>• time to cancer diagnosis;</li> <li>• Gleason score progression;</li> <li>• time to intervention on active surveillance;</li> <li>• time on active surveillance;</li> <li>• results of PSA tests.</li> <li>• Optional sample collection (blood, urine)</li> </ul> <p>Those subjects randomized to ARM A but who did not have an MPMRI-targeted biopsy will have an additional MPMRI at Visit 8. This will be followed by a targeted-biopsy if results of MRI are positive (PI-RADS 3-5).</p> <p>Follow-up will cease once treatment beyond active surveillance is undertaken (prostatectomy, radiation therapy, focal therapy, etc.).</p> |
|-------------------------------------------------------|---------------------------------------------------------------------------------------------------------------------------------------------------------------------------------------------------------------------------------------------------------------------------------------------------------------------------------------------------------------------------------------------------------------------------------------------------------------------------------------------------------------------------------------------------------------------------------------------------------------------------------------------------------------------------------------------------------------------------------------------------------|

5498

5499

5500  
5501  
5502  
5503  
  
5504  
5505  
5506  
5507  
5508  
5509  
5510  
5511  
5512  
5513  
5514  
5515  
5516  
5517  
5518  
5519  
5520  
5521  
5522  
5523  
5524  
5525  
5526  
5527  
5528  
5529  
5530  
5531  
5532  
5533  
5534  
5535  
5536  
5537  
5538  
5539

---

## Appendix 2: MPMRI Reporting Proforma

**Date of MRI scan:**

|                      |                      |                      |                      |                      |                      |                      |                      |                      |
|----------------------|----------------------|----------------------|----------------------|----------------------|----------------------|----------------------|----------------------|----------------------|
| <input type="text"/> |
| day                  |                      |                      | month                |                      |                      | year                 |                      |                      |

**Date of Report:**

|                      |                      |                      |                      |                      |                      |                      |                      |                      |
|----------------------|----------------------|----------------------|----------------------|----------------------|----------------------|----------------------|----------------------|----------------------|
| <input type="text"/> |
| day                  |                      |                      | month                |                      |                      | year                 |                      |                      |

**Reporting Radiologist:**

Radiologists should annotate this diagram with up to 3 suspicious areas scoring 3 or greater on the PI-RADS v2 scale of suspicion. The three most suspicious areas should be annotated, each with the score clearly marked. "T1" should be the area with the greatest degree of suspicion. If applicable, "T2" should be the area with the next greatest degree of suspicion and finally if applicable, "T3" should be the area with the next greatest degree of suspicion. For each suspicious area, triaxial measurements should be recorded with all 3 measurements in orthogonal planes provided whenever possible. In the PZ, lesions should be measured on ADC. In the TZ, lesions should be measured on T2W. If lesion measurement is difficult or compromised on ADC (for PZ) or T2W (for TZ), measurement should be made on the sequence that show the lesion best. For example, coronal measurements may be best performed in the peripheral zone on T2 images.

5540  
5541  
5542  
5543  
5544  
5545  
5546  
5547  
5548  
5549  
5550  
5551  
5552  
5553  
5554  
5555  
5556  
5557  
5558  
5559  
5560  
5561  
5562  
5563  
5564  
5565  
5566  
5567  
5568  
5569  
5570  
5571  
5572  
5573  
5574  
5575  
5576  
5577  
5578  
5579  
5580  
5581  
5582  
5583

NO DCE (Part 1 or 2) – T2/DWI/ADC  
**DO NOT VIEW DCE – YOU SHOULD NOT KNOW THE PSA**

Draw lesions on diagram below annotating each with the T index (i.e T1; T2...)

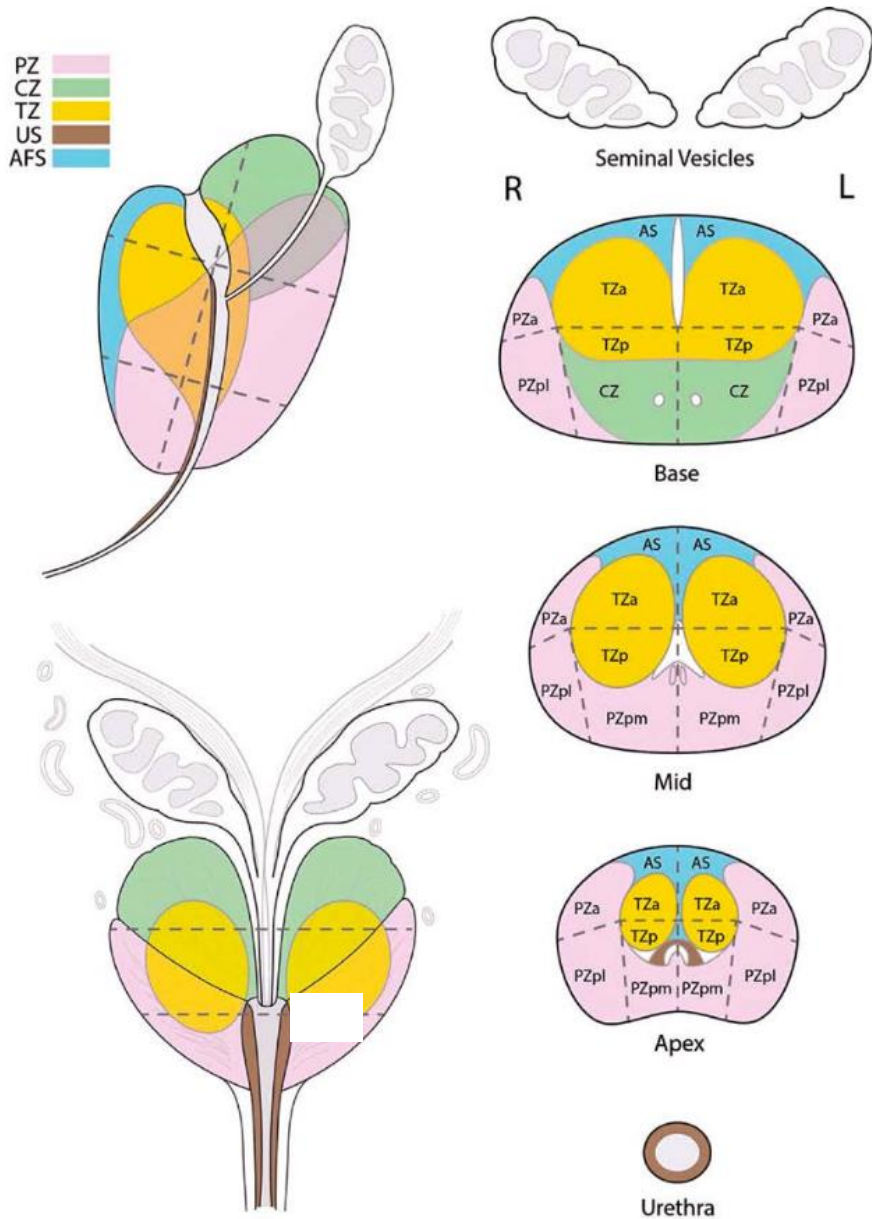



5584  
5585  
5586  
5587  
5588

---

NO DCE (Part 1 or 2) – T2/DWI/ADC  
**DO NOT VIEW DCE – YOU SHOULD NOT KNOW THE  
PSA**

- Image quality:**     **Good**  
                           **Minor image quality issues**  
                           **Acceptable for diagnosis**  
                           **Unacceptable**

5589  
5590  
5591  
5592  
5593  
5594  
5595  
5596

**If image quality is not good please comment:**

\_\_\_\_\_

\_\_\_\_\_

\_\_\_\_\_

---

5597

**How to record locations**

5599 **Location Code Format:** (L/R), (B/M/A), Pi-RadsZone (AS, TZa, TZp, CZ,  
5600 PZa, PZpl, PZpm)

5601

5602 Number of candidate tumor sites: \_\_\_\_\_

5603

5604 Target 1 (Highest Pi-Rads score and then largest):

5605 Present (Y/N): \_\_\_\_\_

5606 Overall Pi-Rads Score(1-5): \_\_\_\_\_ Your Likert Score(1-5): \_\_\_\_\_

5607 Pi-Rads Score (T2) (1-5) : \_\_\_\_\_ Pi-Rads Score (DWI) (1-5): \_\_\_\_\_

5608 Mean ADC: \_\_\_\_\_ Min ADC – single voxel: \_\_\_\_\_ mm<sup>2</sup>/s  
5609 x10<sup>-6</sup>

5610 Size: \_\_\_\_\_x\_\_\_\_\_ x \_\_\_\_\_mm (Ax1 > Ax2 x SI)

5611 Location(s) (largest to smallest area involved):

5612 \_\_\_\_\_/\_\_\_\_\_/\_\_\_\_\_/\_\_\_\_\_

5613 \_\_\_\_\_/\_\_\_\_\_/\_\_\_\_\_/\_\_\_\_\_ (as per location code

5614 format above)

5615 Extraprostatic extension (Y/N/E-equivocal): \_\_\_\_\_

5616

5617 Target 2:

5618 Present (Y/N): \_\_\_\_\_

5619 Overall Pi-Rads Score(1-5): \_\_\_\_\_ Your Likert Score(1-5): \_\_\_\_\_

5620 Pi-Rads Score (T2) (1-5) : \_\_\_\_\_ Pi-Rads Score (DWI) (1-5): \_\_\_\_\_

5621 Mean ADC: \_\_\_\_\_ Min ADC – single voxel: \_\_\_\_\_ mm<sup>2</sup>/s  
5622 x10<sup>-6</sup>

5623 Size: \_\_\_\_\_x\_\_\_\_\_ x \_\_\_\_\_mm (Ax1 > Ax2 x SI)

5624 Location(s) (largest to smallest area involved):

5625 \_\_\_\_\_/\_\_\_\_\_/\_\_\_\_\_/\_\_\_\_\_

5626 \_\_\_\_\_/\_\_\_\_\_/\_\_\_\_\_/\_\_\_\_\_ (as per location code

5627 format above)

5628 Extraprostatic extension (Y/N/E-equivocal): \_\_\_\_\_

5629

5630

5631  
 5632  
 5633  
 5634  
 5635  
 5636  
 5637  
 5638  
 5639  
 5640  
 5641  
 5642  
 5643  
 5644  
 5645  
 5646  
 5647  
 5648  
 5649  
 5650  
 5651  
 5652  
 5653  
 5654  
 5655  
 5656  
 5657  
 5658  
 5659  
 5660  
 5661  
 5662  
 5663  
 5664  
 5665  
 5666  
 5667  
 5668  
 5669  
 5670  
 5671  
 5672  
 5673

Target 3:

Present (Y/N): \_\_\_\_\_  
 Overall Pi-Rads Score(1-5): \_\_\_\_\_ Your Likert Score(1-5): \_\_\_\_\_  
 Pi-Rads Score (T2) (1-5) : \_\_\_\_\_ Pi-Rads Score (DWI) (1-5): \_\_\_\_\_  
 Mean ADC: \_\_\_\_\_ Min ADC – single voxel: \_\_\_\_\_ mm<sup>2</sup>/s  
 x10<sup>-6</sup>  
 Size: \_\_\_\_\_x\_\_\_\_\_ x \_\_\_\_\_mm (Ax1 > Ax2 x SI)  
 Location(s) (largest to smallest area involved):  
 \_\_\_\_\_, \_\_\_\_\_, \_\_\_\_\_, \_\_\_\_\_  
 \_\_\_\_\_, \_\_\_\_\_, \_\_\_\_\_, \_\_\_\_\_ (as per location code  
 format above)  
 Extraprostatic extension (Y/N/E-equivocal): \_\_\_\_\_  
 There are more than 3 targets seen (Y/N): \_\_\_\_\_  
 If yes give describe:  
 \_\_\_\_\_  
 \_\_\_\_\_  
 \_\_\_\_\_  
 LSV invasion (Y/N/E): \_\_\_\_\_ RSV invasion (Y/N/E): \_\_\_\_\_  
 Adenopathy (Y/N): \_\_\_\_\_  
 Worst Pi-Rads Score: \_\_\_\_\_  
 Other Findings:  
 \_\_\_\_\_  
 \_\_\_\_\_  
 \_\_\_\_\_

|       |      |       |      |       |      |                |       |    |
|-------|------|-------|------|-------|------|----------------|-------|----|
| _____ | (SI) | _____ | (AP) | _____ | (LR) | <b>Volume:</b> | _____ | cc |
| cm    | x    | cm    | x    | cm    |      |                |       |    |

5674  
5675  
5676  
5677  
5678  
5679  
5680

---

DCE (Part 2 or 2) – T2/DWI/ADC/DCE  
**VIEW DCE – YOU SHOULD NOT KNOW THE PSA**

- Image quality (including DCE):**
- Good
  - Minor image quality issues (still acceptable)
  - Acceptable for diagnosis
  - Unacceptable

5681  
5682  
5683  
5684  
5685  
5686  
5687

If image quality is not good please comment:

---

---

---

5688  
5689

Number of candidate tumor sites: \_\_\_\_\_

5690  
5691

There was a change in lesions number or rank when adding DCE sequence  
**(Y/N):**\_\_\_\_\_

5692  
5693  
5694  
5695

If Yes, please give the correspondence between Target numbers with and without DCE (i.e. Target 1 without DCE = Target x with DCE) and **fill in all fields below to avoid confusion. Also draw lesions on diagram below again**

5696  
5697  
5698  
5699

**Correspondence:**

Old T1 = New T\_\_\_\_ Old T2 = New T\_\_\_\_ Old T3 = New T\_\_\_\_

5700  
5701  
5702  
5703  
5704  
5705  
5706  
5707  
5708  
5709  
5710  
5711  
5712  
5713  
5714  
5715  
5716  
5717

5718  
5719  
5720  
5721

**If there is change from Part 1 please redraw all lesions on diagram below annotating each with the T index (i.e T1; T2...)**

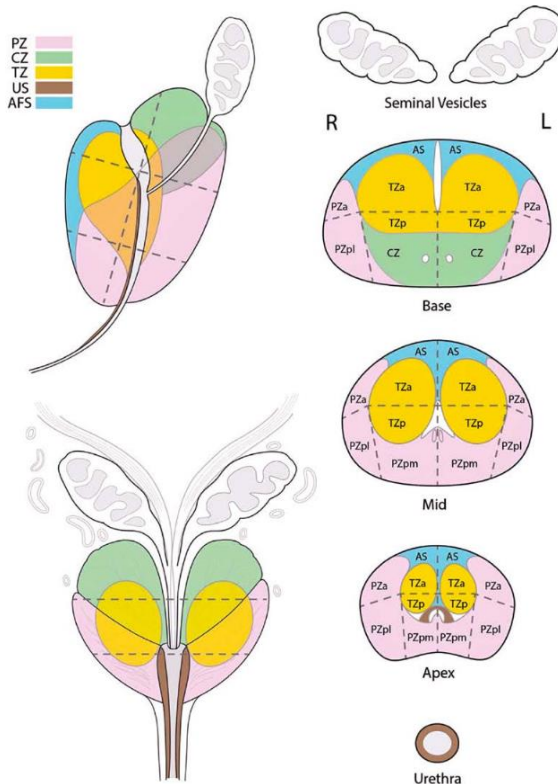

5722

5723 Target 1:

5724 Present (Y/N): \_\_\_\_\_

5725 Change from Part 1 (Y/N): \_\_\_\_\_,

5726 **If YES, complete ALL sections below**

5727 **If NO change in scores, ONLY complete DCE PiRads score below.**

5728 **All other entries are assumed = to Part 1**

5729 Overall Pi-Rads Score: \_\_\_\_\_ Your Likert Score: \_\_\_\_\_

5730 Pi-Rads Score (T2) : \_\_\_\_\_ Pi-Rads Score (DWI): \_\_\_\_\_ **Pi-Rads Score (DCE, 0,1): \_\_\_\_\_**

5732

5733 Mean ADC: \_\_\_\_\_ Min ADC – single voxel: \_\_\_\_\_ mm<sup>2</sup>/s  
5734 x10<sup>-6</sup>

5735 Size: \_\_\_\_\_ x \_\_\_\_\_ x \_\_\_\_\_ mm (Ax1 > Ax2 x SI)

5736 Location(s) (largest to smallest area involved):

5737 \_\_\_\_\_ / \_\_\_\_\_ / \_\_\_\_\_ / \_\_\_\_\_

5738 \_\_\_\_\_ / \_\_\_\_\_ / \_\_\_\_\_ / \_\_\_\_\_

5739 Extraprostatic extension (Y/N/E-equivocal): \_\_\_\_\_

5740

5741 Target 2:

5742 Present (Y/N): \_\_\_\_\_

5743 Change from Part 1 (Y/N): \_\_\_\_\_

5744 **If YES, complete ALL sections below**

5745 **If NO change in scores, ONLY complete DCE PiRads score below.**

5746 **All other entries are assumed = to Part 1**

5747  
5748  
5749 Overall Pi-Rads Score: \_\_\_\_\_ Your Likert Score: \_\_\_\_\_  
5750 Pi-Rads Score (T2) : \_\_\_\_\_ Pi-Rads Score (DWI): \_\_\_\_\_ **Pi-Rads Score (DCE,**  
5751 **0,1):** \_\_\_\_\_  
5752 Mean ADC: \_\_\_\_\_ Min ADC – single voxel: \_\_\_\_\_ mm<sup>2</sup>/s  
5753 x10<sup>-6</sup>  
5754 Size: \_\_\_\_\_x\_\_\_\_\_ x \_\_\_\_\_mm (Ax1 > Ax2 x SI)  
5755 Location(s) (largest to smallest area involved):  
5756 \_\_\_\_\_/\_\_\_\_\_/\_\_\_\_\_/\_\_\_\_\_  
5757 \_\_\_\_\_/\_\_\_\_\_/\_\_\_\_\_/\_\_\_\_\_  
5758 Extraprostatic extension (Y/N/E-equivocal): \_\_\_\_\_  
5759  
5760 Target 3:  
5761 Present (Y/N): \_\_\_\_\_  
5762 Change from Part 1 (Y/N): \_\_\_\_\_  
5763 **If YES, complete ALL sections below**  
5764 **If NO change in scores, ONLY complete DCE PiRads score below.**  
5765 **All other entries are assumed = to Part 1**  
5766 Overall Pi-Rads Score: \_\_\_\_\_ Your Likert Score: \_\_\_\_\_  
5767 Pi-Rads Score (T2) : \_\_\_\_\_ Pi-Rads Score (DWI): \_\_\_\_\_ **Pi-Rads Score (DCE,**  
5768 **0,1):** \_\_\_\_\_  
5769 Mean ADC: \_\_\_\_\_ Min ADC – single voxel: \_\_\_\_\_ mm<sup>2</sup>/s  
5770 x10<sup>-6</sup>  
5771 Size: \_\_\_\_\_x\_\_\_\_\_ x \_\_\_\_\_mm (Ax1 > Ax2 x SI)  
5772 Location(s) (largest to smallest area involved):  
5773 \_\_\_\_\_/\_\_\_\_\_/\_\_\_\_\_/\_\_\_\_\_  
5774 \_\_\_\_\_/\_\_\_\_\_/\_\_\_\_\_/\_\_\_\_\_  
5775 Extraprostatic extension (Y/N/E-equivocal): \_\_\_\_\_  
5776  
5777 There are more than 3 targets seen (Y/N): \_\_\_\_\_  
5778 If yes give describe:  
5779 \_\_\_\_\_  
5780 \_\_\_\_\_  
5781 \_\_\_\_\_  
5782 \_\_\_\_\_  
5783  
5784 LSV invasion (Y/N/E): \_\_\_\_\_ RSV invasion (Y/N/E): \_\_\_\_\_  
5785  
5786 Adenopathy (Y/N): \_\_\_\_\_  
5787  
5788 Worst Pi-Rads Score: \_\_\_\_\_  
5789  
5790 Other Findings:  
5791 \_\_\_\_\_  
5792 \_\_\_\_\_  
5793 \_\_\_\_\_  
5794 \_\_\_\_\_  
5795  
5796 **Safety:**  
5797 Was there an immediate reaction to Gd contrast injection (Y/N): \_\_\_\_\_  
5798

5799 If yes, please give details:

5800

5801

5802

**Will subject require an TRUS/MRI-fused No Yes  
biopsy (Pi-Rads  $\geq 3$ )?**

5803

5804 Please send this form and a DVD with the images AND completed MRI

5805 Report to:

5806

5807 Marlene Kebabdjian

5808 Sunnybrook Health Sciences Center

5809 *Urology Research, A304*

5810 2075 Bayview Avenue

5811 Toronto, Ontario M4N 3M5

5812

5813

5814

5815

5816

5817

5818

5819

5820

5821

5822

5823

5824

5825

5826

5827

5828

5829

5830

5831

5832

5833

5834

5835

5836

5837

5838

5839

5840

5841

5842

5843

5844

5845

5846

5847

5848

5849

5850

5851

### Appendix 3: Example of systematic TRUS guided biopsyschema

5852

5853 Figure depicting 12-core systematic TRUS guided biopsyschema that sites are  
5854 recommended to follow. Axial/coronal sections of a prostate gland (left) showing  
5855 biopsy courses of the 12 biopsies performed under ultrasound guidance with an end  
5856 fire probe. Upperright: axial planes in the sagittal view. a, base; b, mid-gland; c,  
5857 apex. From Haffner et al [37].



5858

---

5859 **Appendix 4: 2-page EQ-5D-5L Questionnaire**

5860 Under each heading, please tick the ONE box that best describes your health TODAY

5861

5862 **MOBILITY**

5863 I have no problems in walking about

5864 I have slight problems in walking about

5865 I have moderate problems in walking about

5866 I have severe problems in walking about

5867 I am unable to walk about

5868

5869 **SELF-CARE**

5870 I have no problems washing or dressing myself

5871 I have slight problems washing or dressing myself

5872 I have moderate problems washing or dressing myself

5873 I have severe problems washing or dressing myself

5874 I am unable to wash or dress myself

5875

5876 **USUAL ACTIVITIES** (*e.g. work, study, housework,*

5877 *family or leisure activities*)

5878 I have no problems doing my usual activities

5879 I have slight problems doing my usual activities

5880 I have moderate problems doing my usual activities

5881 I have severe problems doing my usual activities

5882 I am unable to do my usual activities

5883

5884 **PAIN / DISCOMFORT**

5885 I have no pain or discomfort

5886 I have slight pain or discomfort

5887 I have moderate pain or discomfort

5888 I have severe pain or discomfort

5889 I have extreme pain or discomfort

5890

5891 **ANXIETY / DEPRESSION**

5892 I am not anxious or depressed

5893 I am slightly anxious or depressed

5894 I am moderately anxious or depressed

5895 I am severely anxious or depressed

5896 I am extremely anxious or depressed

5897

5898 © 1990 EuroQol Group. EQ-5D™ is a trade mark of the EuroQol Group



5899 • We would like to know how good or bad your health  
5900 is TODAY.

The best health  
you can imagine

5901 • This scale is numbered from 0 to 100.

5902 • 100 means the best health you can imagine.

5903 0 means the worst health you can imagine.

5904 • Mark an X on the scale to indicate how your health is  
5905 TODAY.

5906 • Now, please write the number you marked on the  
5907 scale in the box below.

5908

5909

5910

5911

YOUR HEALTH TODAY=

5913

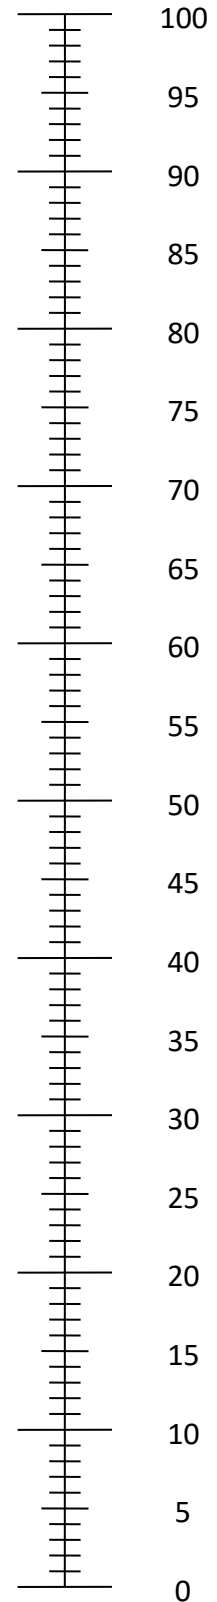

The worst health  
you can imagine



---

Did you experience any of the following in the month **before** your biopsy procedure.  
For each question, tick the box that applies:

3. Fevers

Yes  
  
1

No  
  
2

4. Blood in the urine

Yes  
  
1

No  
  
2

5. Blood in the semen

Yes  
  
1

No  
  
2

6. Blood in the stools or from the back passage

Yes  
  
1

No  
  
2

7. Acute urinary retention, meaning the painful inability to pass urine which was relieved by passing a catheter into the bladder through the penis

Yes  
  
1

No  
  
2

8. Erectile dysfunction, meaning the persistent inability to get and maintain an erection sufficient to allow satisfactory sexual performance

Yes  
  
1

No  
  
2

9. Urinary incontinence, meaning any undesired leakage of urine

Yes  
  
1

No  
  
2

10. Urinary tract infection diagnosed by a healthcare professional

Yes  
  
1

No  
  
2

11. Pain at the site where the biopsies were taken from

Yes  
  
1

No  
  
2

**Thank you for completing the questionnaire. Please hand this to a member of staff before you leave. Please ensure you are given the 30-day questionnaire for completion at 30 days following the biopsy.**

5917

**Appendix 6: 30-day post biopsy questionnaire**

**30-day post biopsy questionnaire**

30-days after the biopsy procedure, the patient should complete this questionnaire:

Did you experience the following problem in the 30-days after the biopsy procedure:

1. Fevers

Yes  No

1 2

2. If you answered yes, specify on which days after the biopsy you had this? (*tick as many boxes as are applicable*)

Days: 0-2 3-5 6-10 11-15 16-20 21-30

|   |   |   |   |   |   |
|---|---|---|---|---|---|
|   |   |   |   |   |   |
| 1 | 2 | 3 | 4 | 5 | 6 |

3. If you answered yes, how much of a problem was this for you? (*tick one box*)

Not a problem at all Minor Problem Moderate Problem Major Problem

1 2 3 4

Did you experience the following problem in the 30-days after the biopsy procedure:

4. Blood in the urine

Yes  No

1 2

5. If you answered yes, specify on which days after the biopsy you had this? (*tick as many boxes as are applicable*)

Days: 0-2 3-5 6-10 11-15 16-20 21-30

|   |   |   |   |   |   |
|---|---|---|---|---|---|
|   |   |   |   |   |   |
| 1 | 2 | 3 | 4 | 5 | 6 |

6. If you answered yes, how much of a problem was this for you? (*tick one box*)

Not a problem at all Minor Problem Moderate Problem Major Problem

1 2 3 4

Did you experience the following problem in the 30-days after the biopsy procedure:

7. Blood in the semen

Yes  No

1 2

8. If you answered yes, specify on which days after the biopsy you had this? (*tick as many boxes as are applicable*)

Days: 0-2 3-5 6-10 11-15 16-20 21-30

|   |   |   |   |   |   |
|---|---|---|---|---|---|
|   |   |   |   |   |   |
| 1 | 2 | 3 | 4 | 5 | 6 |

9. If you answered yes, how much of a problem was this for you? (*tick one box*)

Not a problem at all Minor Problem Moderate Problem Major Problem

1 2 3 4

Did you experience the following problem in the 30-days after the biopsy procedure:

10. Blood in the stools or from the back passage

Yes  No   
1 2

11. If you answered yes, how long after the biopsy did you have this for? (*tick one*)

Days: 0-2 3-5 6-10 11-15 16-20 21-30

|                          |                          |                          |                          |                          |                          |
|--------------------------|--------------------------|--------------------------|--------------------------|--------------------------|--------------------------|
| <input type="checkbox"/> |
| 1                        | 2                        | 3                        | 4                        | 5                        | 6                        |

12. If you answered yes, how much of a problem was this for you? (*tick one box*)

Not a problem at all Minor Problem Moderate Problem Major Problem

|                          |                          |                          |                          |
|--------------------------|--------------------------|--------------------------|--------------------------|
| <input type="checkbox"/> | <input type="checkbox"/> | <input type="checkbox"/> | <input type="checkbox"/> |
| 1                        | 2                        | 3                        | 4                        |

Did you experience the following problem in the 30-days after the biopsy procedure:

13. Acute urinary retention, meaning the painful inability to pass urine which was relieved by passing a catheter into the bladder through the penis

Yes  No   
1 2

14. If you answered yes, how long after the biopsy did this occur? (*tick one*)

Days: 0-2 3-5 6-10 11-15 16-20 21-30

|                          |                          |                          |                          |                          |                          |
|--------------------------|--------------------------|--------------------------|--------------------------|--------------------------|--------------------------|
| <input type="checkbox"/> |
| 1                        | 2                        | 3                        | 4                        | 5                        | 6                        |

15. If you answered yes, how much of a problem was this for you? (*tick one box*)

Not a problem at all Minor Problem Moderate Problem Major Problem

|                          |                          |                          |                          |
|--------------------------|--------------------------|--------------------------|--------------------------|
| <input type="checkbox"/> | <input type="checkbox"/> | <input type="checkbox"/> | <input type="checkbox"/> |
| 1                        | 2                        | 3                        | 4                        |

Did you experience the following problem in the 30-days after the biopsy procedure:

16. Erectile dysfunction, meaning the persistent inability to get and maintain an erection sufficient to allow satisfactory sexual performance

Yes  No   
1 2

17. If you answered yes, how long after the biopsy did you have this for? (*tick one*)

Days: 0-2 3-5 6-10 11-15 16-20 21-30

|                          |                          |                          |                          |                          |                          |
|--------------------------|--------------------------|--------------------------|--------------------------|--------------------------|--------------------------|
| <input type="checkbox"/> |
| 1                        | 2                        | 3                        | 4                        | 5                        | 6                        |

18. If you answered yes, how much of a problem was this for you? (*tick one box*)

Not a problem at all Minor Problem Moderate Problem Major Problem

|                          |                          |                          |                          |
|--------------------------|--------------------------|--------------------------|--------------------------|
| <input type="checkbox"/> | <input type="checkbox"/> | <input type="checkbox"/> | <input type="checkbox"/> |
| 1                        | 2                        | 3                        | 4                        |

5920

Did you experience the following problem in the 30-days after the biopsy procedure:

19. Urinary incontinence, meaning any undesired leakage of urine

Yes  No   
1 2

20. If you answered yes, how long after the biopsy did you have this for? (*tick one*)

Days: 0-2 3-5 6-10 11-15 16-20 21-30

|                          |                          |                          |                          |                          |                          |
|--------------------------|--------------------------|--------------------------|--------------------------|--------------------------|--------------------------|
| <input type="checkbox"/> |
| 1                        | 2                        | 3                        | 4                        | 5                        | 6                        |

21. If you answered yes, how much of a problem was this for you? (*tick one box*)

Not a problem at all Minor Problem Moderate Problem Major Problem

1 2 3 4

Did you experience the following problem in the 30-days after the biopsy procedure:

22. Urinary tract infection diagnosed by a healthcare professional

Yes  No   
1 2

23. If you answered yes, how long after the biopsy did this occur after? (*tick one*)

Days: 0-2 3-5 6-10 11-15 16-20 21-30

|                          |                          |                          |                          |                          |                          |
|--------------------------|--------------------------|--------------------------|--------------------------|--------------------------|--------------------------|
| <input type="checkbox"/> |
| 1                        | 2                        | 3                        | 4                        | 5                        | 6                        |

24. If you answered yes, how much of a problem was this for you? (*tick one box*)

Not a problem at all Minor Problem Moderate Problem Major Problem

1 2 3 4

Did you experience the following problem in the 30-days after the biopsy procedure:

25. Pain at the site where the biopsies were taken from

Yes  No   
1 2

26. If you answered yes, how long after the biopsy did you have this for? (*tick one*)

Days: 0-2 3-5 6-10 11-15 16-20 21-30

|                          |                          |                          |                          |                          |                          |
|--------------------------|--------------------------|--------------------------|--------------------------|--------------------------|--------------------------|
| <input type="checkbox"/> |
| 1                        | 2                        | 3                        | 4                        | 5                        | 6                        |

27. If you answered yes, how much of a problem was this for you? (*tick one box*)

Not a problem at all Minor Problem Moderate Problem Major Problem

1 2 3 4

5921

28. Please list any **new** medications that you have taken **since the biopsy**. Do not list your regular medications but do list any **new** medications started related to the biopsy. Think especially about any painkillers or antibiotics that you may have taken. Only list the medications if you have taken them. An example is given in the first box:

| Name of medication        | Dosage       | Number of doses per day | Number of days |
|---------------------------|--------------|-------------------------|----------------|
| <i>e.g. ciprofloxacin</i> | <i>500mg</i> | <i>2</i>                | <i>3</i>       |
|                           |              |                         |                |
|                           |              |                         |                |
|                           |              |                         |                |
|                           |              |                         |                |
|                           |              |                         |                |
|                           |              |                         |                |
|                           |              |                         |                |

29. Since the biopsy, have you had contacts with hospital services for reasons related to the biopsy, which were unplanned and not part of the routine study visits?

*Please answer yes if you have had any unplanned contact with any healthcare staff e.g. doctor, nurse, other. Please also answer yes if you have had any unplanned consultations with healthcare staff over the phone*

Yes

1

No

2

30. If yes, please answer describe:

(i) who the contact was with (*e.g. nurse/doctor/other*)

(ii) reason for contact (*e.g. concern over fevers*)

(iii) manner of contact (*e.g. telephone/attendance at outpatient clinic/attendance in accident and emergency*)

(iv) any treatment you received (please be as specific as possible *e.g. "I was admitted to the ward and treated for an infection of the blood stream for 5 days of intravenous antibiotics with 1.2g co-amoxiclav three times a day and I had 2 days of painkillers with intravenous paracetamol 1g four times a day"*):

5922

31. How many times, if any, have you attended the accident and emergency department?

32. How many nights, if any, have you been admitted to hospital as an inpatient?

33. How many days, if any, have you been admitted to a day ward in hospital without staying the night?

34. How many days, if any, have you been admitted to an intensive care unit for?

35. Since the biopsy, have you had contact with the community healthcare team for reasons related to the biopsy?

*Please answer yes if you have had any contact with any healthcare staff in the community e.g. GP, practice nurse, community nurse, other. Please also answer yes if you have had any consultations with community healthcare staff over the phone*

Yes  
  
1

No  
  
2

36. If yes, please answer describe:

(i) who the contact was with (e.g. nurse/doctor/other)

(ii) reason for contact (e.g. concern over fevers)

(iii) manner of contact (e.g. telephone/attendance at GP surgery/home visit)

(iv) any treatment you received (please be as specific as possible e.g. "I received 5 days of oral antibiotics for a urinary tract infection- 625mg co-amoxiclav three times a day and I had 2 days of painkillers with paracetamol 1g four times a day"):

5923  
5924



37. Have you felt unwell in any other way that we have not asked that you feel is due to the biopsy?

Yes  
  
1

No  
  
2

38. If you answered yes, please describe:

39. If you answered yes, how long after the biopsy did you have this for? (*tick one*)

| Days: | 0-2                      | 3-5                      | 6-10                     | 11-15                    | 16-20                    | 21-30                    |
|-------|--------------------------|--------------------------|--------------------------|--------------------------|--------------------------|--------------------------|
|       | <input type="checkbox"/> |
|       | 1                        | 2                        | 3                        | 4                        | 5                        | 6                        |

40. If you answered yes, how much of a problem was this for you? (*tick one box*)

Not a problem

at all  
  
1

Minor Problem

  
2

Moderate Problem

  
3

Major Problem

  
4

41. If **another biopsy** in the future was medically necessary, how much of a problem would it be for you to undergo the same procedure? (*tick one box*)

Not a problem

at all  
  
1

Minor Problem

  
2

Moderate Problem

  
3

Major Problem

  
4

?

?

**Thank you for completing the questionnaire. Please post the questionnaire in the pre-paid self-addressed envelope or give to the research team at your next visit. Please contact us if you have any queries.**

?

5925  
5926

---

**PRECISE Trial: Amendment 2**

**Summary of Changes**

5927  
5928  
5929  
5930  
5931  
5932  
5933  
5934  
5935  
5936  
5937  
5938  
5939  
5940  
5941  
5942  
5943  
5944  
5945  
5946  
5947  
5948  
5949  
5950  
5951  
5952  
5953

- Minor administrative changes were made to the current protocol to avoid discrepancy. Minor errors were corrected.
- The following changes were made:
- Methodology - page 5, correction in language
  - Abbreviations - page 9, correction in text
  - Section 9.3 Table 3, omission in Vitals, DRE indication in columns, added.
  - Section 10.1, second bullet removed.
  - Section 9.3 Table 3 – clarification of footnotes at the end of the table on page 28
  - Section 10.1 – language added to reflect Arm A who do not require a biopsy will complete an EQ-5D-5L at visit 4
  - Section 11.3 – removal of the last sentence (In addition, subject needs to.....) in the paragraph that starts Men with a positive MRI.....
  - Sections 11.7, 11.8, 11.9, 11.10, - 'Vitals, DRE' added to these sections
  - Section 13, deletion of parentheses referring to maximum cancer core length
  - Section 13.0 Data, first bullet, EQ-5D-5L -amended verbage
  - Section 14.5.10 Health related Quality of Life – Removal of '24-48 hours post intervention' added 'at 2 years'
  - Appendix 1 – Visit 5 added 'vitals'
  - Appendix 1 – Visit 6 added 'vitals, DRE'
  - Appendix 1 – Visit 7 added 'vitals'
  - Appendix 1 – Visit 8 added 'vitals, DRE'

5954  
5955  
5956  
5957  
5958  
5959  
5960  
5961  
5962  
5963  
5964  
5965  
5966  
5967  
5968  
5969  
5970  
5971  
5972  
5973  
5974  
5975  
5976  
5977  
5978  
5979  
5980  
5981  
5982  
5983  
5984  
5985  
5986  
5987  
5988  
5989  
5990  
5991  
5992  
5993  
5994  
5995  
5996  
5997  
5998

---

**1. Title Page**

*Full title:*

**A phase III multi-centre open-label randomized controlled trial of multi-parametric magnetic resonance imaging (MRI)-targeted biopsy compared to systematic trans-rectal ultrasound (TRUS) guided biopsy for the diagnosis of prostate cancer in men without prior biopsy.**

**2. Short title: Prostate Evaluation for Clinically Important disease: MRI vs Standard Evaluation procedures. (PRECISE)**

**Date: 13 March 2017**

**Version 3.0**

**Sponsor:**

Canadian Urology Research Consortium (CURC)

**Principal Investigator:**

Dr. Laurence Klotz  
Professor of Surgery, University of Toronto  
Sunnybrook Health Sciences Centre  
2075 Bayview Avenue, #MG 408  
Toronto Ontario M4N3M5 Canada  
Voice 416 480 4673  
Fax 416 480 6121

**Co-Principal Investigators:**

Dr. Masoom A. Haider  
Sunnybrook Health Sciences Centre  
2075 Bayview Avenue, Room AG 57  
Toronto Ontario M4N 3M5 Canada

Dr. Andrew Loblaw  
Sunnybrook Health Sciences Centre  
2075 Bayview Avenue, Room T2 161  
Toronto Ontario M4N 3M5 Canada

**Co- Investigators:**

Dr. Laurent Milot  
Sunnybrook Health Sciences Centre  
2075 Bayview Avenue, Room AG 279  
Toronto Ontario M4N 3M5 Canada

Dr. Craig Earle

---

5999 Sunnybrook Health Sciences Centre  
6000 2075 Bayview Avenue  
6001 Toronto Ontario M4N 3M5 Canada

6002  
6003

6004 **Confidential**

6005 The information provided in this document is strictly confidential and is intended  
6006 solely for the guidance of the clinical investigation. Reproduction or disclosure of this  
6007 document - whether in part or in full - to parties not associated with the clinical  
6008 investigation, or its use for any other purpose, without the prior written consent of  
6009 the PI is not permitted.

6010  
6011

6012 **2. Signature of Investigators**

6013

6014 **A phase III multi-centre open-label randomized controlled trial of**  
6015 **multi-parametric magnetic resonance imaging (MRI)-targeted biopsy**  
6016 **compared to systematic trans-rectal ultrasound (TRUS) guided biopsy**  
6017 **for the diagnosis of prostate cancer in men without prior biopsy.**

6018

6019 **Date: 13 March 2017**

6020 **Version 3.0**

6021

6022

6023

6024 The signatory agrees to the content of the final clinical study protocol as presented.

6025

6026

6027 Signature: \_\_\_\_\_

6028

6029 Name: \_\_\_\_\_

6030

6031 Title: \_\_\_\_\_

6032

6033 Date: \_\_\_\_\_

6034

6035 Site name: \_\_\_\_\_

6036

6037

6038

### 3. Synopsis

|                      |                                                                                                                                                                                                                                                                                                                                                                                                                                                                                                                                                                                                                                                                                                                                                                                                                                                                                                                                                                                                                                                                                                                                                                                                                                                                                                                                                                                                                                                                                                                                                                                                                                                                                                                                                                                          |
|----------------------|------------------------------------------------------------------------------------------------------------------------------------------------------------------------------------------------------------------------------------------------------------------------------------------------------------------------------------------------------------------------------------------------------------------------------------------------------------------------------------------------------------------------------------------------------------------------------------------------------------------------------------------------------------------------------------------------------------------------------------------------------------------------------------------------------------------------------------------------------------------------------------------------------------------------------------------------------------------------------------------------------------------------------------------------------------------------------------------------------------------------------------------------------------------------------------------------------------------------------------------------------------------------------------------------------------------------------------------------------------------------------------------------------------------------------------------------------------------------------------------------------------------------------------------------------------------------------------------------------------------------------------------------------------------------------------------------------------------------------------------------------------------------------------------|
| Title                | A phase III multi-centre, open-label randomized controlled trial of multi-parametric magnetic resonance imaging (MRI)-targeted biopsy compared to systematic trans-rectal ultrasound (TRUS) guided biopsy for the diagnosis of prostate cancer in men without prior biopsy.                                                                                                                                                                                                                                                                                                                                                                                                                                                                                                                                                                                                                                                                                                                                                                                                                                                                                                                                                                                                                                                                                                                                                                                                                                                                                                                                                                                                                                                                                                              |
| Short Title          | <u>P</u> rostate <u>E</u> valuation for <u>C</u> linically <u>I</u> mportant disease: MRI vs <u>S</u> tandard <u>E</u> valuation procedures. (PRECISE)                                                                                                                                                                                                                                                                                                                                                                                                                                                                                                                                                                                                                                                                                                                                                                                                                                                                                                                                                                                                                                                                                                                                                                                                                                                                                                                                                                                                                                                                                                                                                                                                                                   |
| Clinical study phase | Phase III                                                                                                                                                                                                                                                                                                                                                                                                                                                                                                                                                                                                                                                                                                                                                                                                                                                                                                                                                                                                                                                                                                                                                                                                                                                                                                                                                                                                                                                                                                                                                                                                                                                                                                                                                                                |
| Study Objectives     | <p><b>Primary Objective</b></p> <p>To determine whether the proportion of men with clinically significant cancer (Gleason <math>\geq 7</math>) detected by MRI-targeted biopsy is no less than systematic TRUS guided biopsy.</p> <p><b>Secondary Objectives</b></p> <p>27. To determine whether the proportion of men with clinically significant cancer (Gleason <math>\geq 7</math>) detected by MRI-targeted biopsy is greater than systematic TRUS guided biopsy.</p> <p>28. Proportion of men in each arm with clinically insignificant cancer detected.</p> <p>29. Proportion of men in each arm with Gleason <math>\geq 4+3</math> detected.</p> <p>30. Proportion of men in MRI arm who avoid biopsy.</p> <p>31. Proportion of men in the MRI arm whom the PI-RADS score for suspicion of clinically significant cancer was 3, 4 or 5 but no clinically significant cancer was detected.</p> <p>32. Proportion of men in each arm who go on to definitive local treatment (e.g. radical prostatectomy, radiotherapy, brachytherapy) or systemic treatment (e.g. hormone therapy, chemotherapy).</p> <p>33. Proportion of men with a negative MRI who develop a positive MRI and/ or Gleason <math>\geq 7</math> cancer by 2 years.</p> <p>34. Proportion of men with post-biopsy adverse events</p> <p>35. Health-related quality of life scores.</p> <p>36. Proportion with Gleason grade upgrading in men undergoing radical prostatectomy.</p> <p>37. To determine the cost per diagnosis of cancer.</p> <p>38. To determine the impact of the addition of Gd based contrast compared to a non contrast abbreviated MRI protocol on target yield</p> <p>39. To determine if a radiologist Likert score not based on Pi-Rads has a better target yield than Pi_Rads alone</p> |
| Test procedures      | Subjects will be randomized to either<br><b>ARM A:</b> multi-parametric magnetic resonance imaging (MRI)                                                                                                                                                                                                                                                                                                                                                                                                                                                                                                                                                                                                                                                                                                                                                                                                                                                                                                                                                                                                                                                                                                                                                                                                                                                                                                                                                                                                                                                                                                                                                                                                                                                                                 |

|                                           |                                                                                                                                                                                                                                                                                                                                                                                                                                                                                                                                                                                                                                                                                                                                                                                   |
|-------------------------------------------|-----------------------------------------------------------------------------------------------------------------------------------------------------------------------------------------------------------------------------------------------------------------------------------------------------------------------------------------------------------------------------------------------------------------------------------------------------------------------------------------------------------------------------------------------------------------------------------------------------------------------------------------------------------------------------------------------------------------------------------------------------------------------------------|
|                                           | <p>which, depending on outcome, may be followed by (MRI)-targeted biopsy.</p> <p><b>ARM B:</b> systematic trans-rectal ultrasound (TRUS) guided biopsy.</p> <p>Subjects in both arms will complete a number of different questionnaires and will have PSA measurements taken. If subjects consent to participate in correlative studies, they will also need to provide blood, urine, semen and tissue samples at pre-specified time points.</p>                                                                                                                                                                                                                                                                                                                                  |
| Indication                                | Clinical suspicion of prostate cancer, based on PSA or results of digital rectal exam, with no prior biopsy.                                                                                                                                                                                                                                                                                                                                                                                                                                                                                                                                                                                                                                                                      |
| Diagnosis and main criteria for inclusion | <p>In order to be eligible, <u>all</u> inclusion criteria must be met.</p> <p>11. Men at least 18 years of age referred with clinical suspicion of prostate cancer who have been advised to have a prostate biopsy;</p> <p>12. <math>\geq 5\%</math> chance of high-grade prostate cancer as calculated using individualized risk assessment of prostate cancer calculator, PCPTRC 2.0, found at <a href="http://deb.uthscsa.edu/URORiskCalc/Pages/calcs.jsp">http://deb.uthscsa.edu/URORiskCalc/Pages/calcs.jsp</a>; For men under age 55, the default age of 55 should be entered on the risk calculator.</p> <p>13. Serum PSA <math>\leq 20</math>ng/ml;</p> <p>14. Fit to undergo all procedures listed in protocol;</p> <p>15. Able to provide written informed consent.</p> |
| Exclusion Criteria                        | <p>Men who meet the following criteria at the time of screening will be excluded:</p> <p>13. Prior prostate biopsy;</p> <p>14. Prior treatment for prostate cancer;</p> <p>15. Contraindication to MRI (e.g. claustrophobia, pacemaker, estimated GFR <math>\leq 50</math>mls/min);</p> <p>16. Contraindication to prostate biopsy;</p> <p>17. Men in whom artifact would reduce the quality of the MRI; i.e, previous hip replacement surgery, metallic hip replacement or extensive pelvic orthopaedic metal work;</p> <p>18. Unfit to undergo any procedures listed in protocol.</p>                                                                                                                                                                                           |
| Study Design                              | This is a multi-centre open-label, randomized two arm study. Men are either randomized to receive MRI or a systematic trans-rectal ultrasound (TRUS) guided biopsy.                                                                                                                                                                                                                                                                                                                                                                                                                                                                                                                                                                                                               |
| Methodology                               | <p>Eligible subjects will be randomized in a 1:1 ratio to receive either (ARM A) multi-parametric magnetic resonance imaging (MRI) which, depending on outcome, may be followed by (MRI)-targeted biopsy, or (ARM B) systematic trans-rectal ultrasound (TRUS) guided biopsy. The time frame for data collection is shown in Appendix 1.</p> <p><u>All subjects</u> will have a PSA test prior to, or at Visit 1, and will complete a baseline EQ-5D-5L questionnaire. In addition, they will contribute optional blood, urine, semen and tissue samples if they consent to correlative studies.</p>                                                                                                                                                                              |

|                               |                                                                                                                                                                                                                                                                                                                                                                                                                                                                                                                                                                                                                                                                                                                                                                                                                                                                                                                                                                                                                                                                                                                                                                                                                                                                                                                                                                                                                                                                                                                                                                  |
|-------------------------------|------------------------------------------------------------------------------------------------------------------------------------------------------------------------------------------------------------------------------------------------------------------------------------------------------------------------------------------------------------------------------------------------------------------------------------------------------------------------------------------------------------------------------------------------------------------------------------------------------------------------------------------------------------------------------------------------------------------------------------------------------------------------------------------------------------------------------------------------------------------------------------------------------------------------------------------------------------------------------------------------------------------------------------------------------------------------------------------------------------------------------------------------------------------------------------------------------------------------------------------------------------------------------------------------------------------------------------------------------------------------------------------------------------------------------------------------------------------------------------------------------------------------------------------------------------------|
|                               | <p><u>All subjects in ARM A</u> will complete an EQ-5D-5L questionnaire and an immediate post-MRI/TRUS Fusion Biopsy questionnaire following the MRI.</p> <p><u>Subjects in ARM A who do not receive a subsequent biopsy</u> will complete an EQ-5D-5L questionnaire when they find out the results of the MRI 3 weeks (<math>\pm</math> 1 week) after the procedure. They will have another MRI and PSA test 2 years after the initial MRI. When they complete the study after 2 years of follow up, they will complete another EQ-5D-5L questionnaire.</p> <p><u>Subjects in ARM A who do receive a MRI-targeted biopsy</u> will complete an immediate post-biopsy questionnaire at the time of the biopsy, another EQ-5D-5L questionnaire and a 30-day post biopsy questionnaire when they find out the results of the biopsy, 3 weeks (<math>\pm</math> 1 week) after the procedure. They will have an additional PSA test every 6 months for two years, and at the end of 2 years of follow up, they will complete another EQ-5D-5L questionnaire.</p> <p><u>All subjects in ARM B</u> will complete an immediate post-biopsy questionnaire following the standardized TRUS-guided biopsy. They will complete another EQ-5D-5L questionnaire and a 30-day post biopsy questionnaire when they find out the results of the biopsy, 3 weeks (<math>\pm</math> 1 week) after the procedure. They will have an additional PSA test every 6 months for two years, and at the end of 2 years of follow up, they will complete another EQ-5D-5L questionnaire.</p> |
| Type of control               | This is an open-label randomized study.                                                                                                                                                                                                                                                                                                                                                                                                                                                                                                                                                                                                                                                                                                                                                                                                                                                                                                                                                                                                                                                                                                                                                                                                                                                                                                                                                                                                                                                                                                                          |
| Number of subjects            | This study requires 422 subjects (211 in each arm). To account for potential withdrawal / loss to follow up and the effect of stratification, the sample size will be inflated by 5%, and a target of <b>450 men</b> will be recruited.                                                                                                                                                                                                                                                                                                                                                                                                                                                                                                                                                                                                                                                                                                                                                                                                                                                                                                                                                                                                                                                                                                                                                                                                                                                                                                                          |
| Primary endpoint              | The proportion of men in each arm with clinically significant cancer (Gleason $\geq$ 7) will be calculated based on histology results from biopsy procedures. Analysis will be on the per protocol study population.                                                                                                                                                                                                                                                                                                                                                                                                                                                                                                                                                                                                                                                                                                                                                                                                                                                                                                                                                                                                                                                                                                                                                                                                                                                                                                                                             |
| Secondary endpoints           | See section 7.4                                                                                                                                                                                                                                                                                                                                                                                                                                                                                                                                                                                                                                                                                                                                                                                                                                                                                                                                                                                                                                                                                                                                                                                                                                                                                                                                                                                                                                                                                                                                                  |
| Plan for statistical analysis | See section 14.0.                                                                                                                                                                                                                                                                                                                                                                                                                                                                                                                                                                                                                                                                                                                                                                                                                                                                                                                                                                                                                                                                                                                                                                                                                                                                                                                                                                                                                                                                                                                                                |
| Funding                       | The total budget for this trial is \$3,000,000. (see attached).Ontario Institute for Cancer Research (OICR) has committed to \$1,500,000 in support of this study (letter appended).We hope to obtain the additional \$1,500,000 from the Movember Accelerated Translational Research Grant Competition                                                                                                                                                                                                                                                                                                                                                                                                                                                                                                                                                                                                                                                                                                                                                                                                                                                                                                                                                                                                                                                                                                                                                                                                                                                          |

6041  
6042

|      |                                                                                          |           |
|------|------------------------------------------------------------------------------------------|-----------|
| 6043 | <b>Table of Contents</b>                                                                 |           |
| 6044 | <b>1. TITLE PAGE</b> .....                                                               | <b>1</b>  |
| 6045 | <b>2. SIGNATURE OF INVESTIGATORS</b> .....                                               | <b>11</b> |
| 6046 | <b>3. SYNOPSIS</b> .....                                                                 | <b>12</b> |
| 6047 | <b>4. ABBREVIATIONS AND DEFINITIONS</b> .....                                            | <b>18</b> |
| 6048 | <b>5. TRIAL SUMMARY</b> .....                                                            | <b>19</b> |
| 6049 | 5.1 AIM AND RATIONALE .....                                                              | 19        |
| 6050 | 5.2 METHODS .....                                                                        | 191       |
| 6051 | 5.3 PARTICIPATING SITES .....                                                            | 21        |
| 6052 | 5.4 STUDY OUTCOMES .....                                                                 | 21        |
| 6053 | 5.4.1 <i>Primary outcome</i> .....                                                       | 21        |
| 6054 | 5.4.2 <i>Secondary outcomes</i> .....                                                    | 21        |
| 6055 | <b>6. BACKGROUND</b> .....                                                               | <b>22</b> |
| 6056 | 6.1 PROSTATE CANCER DIAGNOSIS .....                                                      | 22        |
| 6057 | 6.2 CLINICALLY SIGNIFICANT VERSUS CLINICALLY INSIGNIFICANT PROSTATE CANCER.....          | 22        |
| 6058 | 6.3 CURRENT STANDARD OF CARE: SYSTEMATIC TRUS GUIDED BIOPSY .....                        | 23        |
| 6059 | 6.4 THE EMERGING ROLE OF MRI IN PROSTATE CANCER DIAGNOSIS AND TREATMENT .....            | 23        |
| 6060 | 6.4.1 <i>The role of imaging in prostate cancer diagnosis</i> .....                      | 23        |
| 6061 | 6.4.2 <i>Limitations of early MRI studies in prostate cancer</i> .....                   | 23        |
| 6062 | 6.4.3 <i>Emerging role of MRI in the diagnosis of prostate cancer</i> .....              | 24        |
| 6063 | 6.4.4 <i>Prostate cancer detection rates of MRI-targeted biopsy are similar to other</i> |           |
| 6064 | <i>methods</i> .....                                                                     | 26        |
| 6065 | 6.4.5 <i>Limitations of studies reporting MPMRI-targeted prostate biopsy</i> .....       | 26        |
| 6066 | 6.5 NOVELTY OF PRECISE .....                                                             | 27        |
| 6067 | <b>7. TRIAL OBJECTIVES</b> .....                                                         | <b>27</b> |
| 6068 | 7.1 OVERALL AIM .....                                                                    | 27        |
| 6069 | 7.2 HYPOTHESES .....                                                                     | 27        |
| 6070 | 7.3 PRIMARY OBJECTIVE.....                                                               | 27        |
| 6071 | 7.4 SECONDARY OBJECTIVES .....                                                           | 28        |
| 6072 | 7.5 EXPLANATION FOR NON-INFERIORITY HYPOTHESIS .....                                     | 28        |
| 6073 | 7.6 ANTICIPATED TIMELINE OF STUDY PROGRESSION .....                                      | 28        |
| 6074 | <b>8. STUDY POPULATION</b> .....                                                         | <b>29</b> |
| 6075 | 8.1 NUMBER OF SUBJECTS .....                                                             | 29        |
| 6076 | 8.2 SUBJECT INCLUSION CRITERIA .....                                                     | 29        |
| 6077 | 8.3 SUBJECT EXCLUSION CRITERIA.....                                                      | 29        |
| 6078 | <b>9. STUDY DESIGN</b> .....                                                             | <b>30</b> |
| 6079 | 9.1 STUDY DESIGN .....                                                                   | 30        |
| 6080 | 9.2 STUDY TRIAL SCHEMA.....                                                              | 31        |
| 6081 | 9.3 TIMELINE OF SUBJECT CONTACT .....                                                    | 32        |
| 6082 | <b>10. TRIAL INTERVENTIONS AND PROCEDURES</b> .....                                      | <b>36</b> |
| 6083 | 10.1 EQ-5D-5L QUESTIONNAIRES.....                                                        | 36        |
| 6084 | 10.2 MULTIPARAMETRIC MRI IMAGING PROCEDURE .....                                         | 36        |
| 6085 | 10.2.1 <i>MRI Protocol</i> .....                                                         | 36        |
| 6086 | 10.2.2 <i>MRI reporting</i> .....                                                        | 37        |
| 6087 | 10.3 NO TARGET IDENTIFIED ON MPMRI (PIRADS 1 OR 2).....                                  | 38        |
| 6088 | 10.4 MRI-TARGETED BIOPSY .....                                                           | 38        |
| 6089 | 10.4.1 <i>MRI choice of targets for targeted biopsy</i> .....                            | 38        |



|      |                                                                                      |           |
|------|--------------------------------------------------------------------------------------|-----------|
| 6090 | 10.4.2 MRI Biopsy .....                                                              | 39        |
| 6091 | 10.5 SYSTEMATIC TRUS GUIDED BIOPSY .....                                             | 402       |
| 6092 | 10.6 PATHOLOGY .....                                                                 | 40        |
| 6093 | 10.7 POST-PROCEDURAL CARE .....                                                      | 40        |
| 6094 | 10.8 IMMEDIATE POST-BIOPSY QUESTIONNAIRE .....                                       | 40        |
| 6095 | 10.9 30-DAY POST-BIOPSY QUESTIONNAIRE.....                                           | 41        |
| 6096 | 10.10 RESULTS AND TREATMENT DECISION (VISIT 4).....                                  | 41        |
| 6097 | 10.11 FOLLOW UP PERIOD.....                                                          | 42        |
| 6098 | 10.12 ADDITIONAL TESTS FOR BIOMARKER DISCOVERY - OPTIONAL .....                      | 43        |
| 6099 | 10.12.1 Samples to be collected for future biomarker discovery work (Optional) ..... | 43        |
| 6100 | 10.13 LONG-TERM DATA LINKAGE – PERMISSION TO CONTACT .....                           | 43        |
| 6101 | 10.14 END OF STUDY .....                                                             | 44        |
| 6102 | 10.15 RISKS AND BENEFITS TO PARTICIPANTS .....                                       | 44        |
| 6103 | 10.15.1 Risks to subjects.....                                                       | 44        |
| 6104 | 10.15.2 Benefits to subjects.....                                                    | 46        |
| 6105 | 10.16 CONCOMITANT MEDICATIONS .....                                                  | 46        |
| 6106 | 10.16.1 Permitted Medications .....                                                  | 46        |
| 6107 | 10.16.2 Non-Drug Therapies.....                                                      | 46        |
| 6108 | <b>11. SCHEDULE OF STUDY VISITS .....</b>                                            | <b>47</b> |
| 6109 | 11.1 VISIT 1 (SCREENING/RANDOMIZATION): SCREENING, CONSENT, RANDOMIZATION.....       | 47        |
| 6110 | 11.2 VISIT 2 (MRI): ARM A, FOR MEN RANDOMIZED TO MRI .....                           | 47        |
| 6111 | 11.3 VISIT 3 (BIOPSY): ARM A, MRI-TARGETED BIOPSY OF PROSTATE .....                  | 47        |
| 6112 | 11.4 VISIT 3 (BIOPSY): ARM B, FOR MEN RANDOMIZED TO A SYSTEMATIC TRUS-BIOPSY .....   | 48        |
| 6113 | 11.5 VISIT 4 (POST-TEST FOLLOW UP): ARM A, FOR MEN WHO DID NOT RECEIVE A BIOPSY..... | 49        |
| 6114 | 11.6 VISIT 4 (POST-TEST FOLLOW UP): FOR ALL MEN WHO RECEIVED A BIOPSY .....          | 49        |
| 6115 | 11.7 VISIT 5 ( 6 MONTH FOLLOW UP):.....                                              | 40        |
| 6116 | 11.8 VISIT 6 (1 YEAR FOLLOW UP): 52 WEEK FOLLOW UP .....                             | 49        |
| 6117 | 11.9 VISIT 7 (18 MONTH FOLLOW UP):.....                                              | 41        |
| 6118 | 11.8 VISIT 8 (2 YEAR FOLLOW UP): END OF STUDY.....                                   | 50        |
| 6119 | <b>12. RANDOMIZATION .....</b>                                                       | <b>50</b> |
| 6120 | 12.1 REGISTRATION AND RANDOMIZATION PROCEDURE.....                                   | 50        |
| 6121 | 12.2 STRATIFICATION.....                                                             | 51        |
| 6122 | 12.3 BLINDING AND MEASURES TAKEN TO AVOID BIAS .....                                 | 51        |
| 6123 | <b>13. DATA.....</b>                                                                 | <b>51</b> |
| 6124 | <b>14. STATISTICAL CONSIDERATIONS .....</b>                                          | <b>52</b> |
| 6125 | 14.1 SAMPLE SIZE CALCULATION .....                                                   | 52        |
| 6126 | 14.2 INTERIM ANALYSIS .....                                                          | 46        |
| 6127 | 14.3 POPULATIONS: .....                                                              | 55        |
| 6128 | 14.4 PRIMARY OUTCOME.....                                                            | 55        |
| 6129 | 14.5 SECONDARY OUTCOMES .....                                                        | 55        |
| 6130 | <b>15. PARTICIPANT COMPLIANCE AND WITHDRAWAL .....</b>                               | <b>59</b> |
| 6131 | 15.1 SUBJECT WITHDRAWAL FROM STUDY.....                                              | 59        |
| 6132 | 15.2 STUDY COMPLETION .....                                                          | 60        |
| 6133 | <b>16. DATA MONITORING, QUALITY CONTROL AND SAFETY.....</b>                          | <b>60</b> |
| 6134 | 16.1 STOPPING / DISCONTINUATION RULES .....                                          | 60        |
| 6135 | 16.2 MONITORING, QUALITY CONTROL AND ASSURANCE .....                                 | 61        |
| 6136 | 16.3 ASSESSMENT OF SAFETY .....                                                      | 61        |
| 6137 | 16.3.1 Definition of an Adverse Event (AE) .....                                     | 61        |
| 6138 | 16.3.2 Definition of a Serious Adverse Event (SAE).....                              | 61        |
| 6139 | 16.3.3 Disease-Related Events or Outcomes Not Qualifying as SAEs.....                | 62        |

|      |                                                                                           |           |
|------|-------------------------------------------------------------------------------------------|-----------|
| 6140 | <i>16.3.4 Lack of Efficacy</i> .....                                                      | 62        |
| 6141 | <i>16.3.5 Clinical Laboratory Abnormalities and Other Abnormal Assessments as AEs and</i> |           |
| 6142 | <i>SAEs</i> .....                                                                         | 62        |
| 6143 | <i>16.3.6 Recording/Reporting AEs and SAEs</i> .....                                      | 63        |
| 6144 | <i>16.3.7 Evaluating AEs and SAEs</i> .....                                               | 64        |
| 6145 | <i>16.3.8 Follow-up of AEs and SAEs</i> .....                                             | 65        |
| 6146 | <i>16.3.9 Prompt Reporting of SAEs</i> .....                                              | 65        |
| 6147 | <i>16.3.10 Post-study AEs and SAEs</i> .....                                              | 66        |
| 6148 | <b>17. STUDY ADMINISTRATION</b> .....                                                     | <b>66</b> |
| 6149 | 17.1 REGULATORY AND ETHICAL CONSIDERATIONS .....                                          | 66        |
| 6150 | <i>17.1.1 Ethical Conduct of the Study and Ethics Approval</i> .....                      | 66        |
| 6151 | <i>17.1.2 Informed Consent</i> .....                                                      | 67        |
| 6152 | <i>17.1.3 Investigator Reporting Requirements</i> .....                                   | 67        |
| 6153 | 17.2 STUDY MONITORING .....                                                               | 67        |
| 6154 | 17.3 QUALITY ASSURANCE.....                                                               | 68        |
| 6155 | 17.4 STUDY AND SITE CLOSURE .....                                                         | 68        |
| 6156 | 17.5 RECORDS RETENTION .....                                                              | 69        |
| 6157 | 17.6 DATA MANAGEMENT .....                                                                | 69        |
| 6158 | 17.7 PUBLICATION .....                                                                    | 69        |
| 6159 | <b>18. REFERENCES</b> .....                                                               | <b>71</b> |
| 6160 | <b>APPENDICES</b> .....                                                                   | <b>76</b> |
| 6161 | APPENDIX 1: TIME WINDOWS FOR DATA COLLECTION .....                                        | 76        |
| 6162 | APPENDIX 2: MPMRI REPORTING PROFORMA .....                                                | 81        |
| 6163 | APPENDIX 3: EXAMPLE OF SYSTEMATIC TRUS GUIDED BIOPSYSCHEMA.....                           | 83        |
| 6164 | APPENDIX 4: 2-PAGE EQ-5D-5L QUESTIONNAIRE .....                                           | 84        |
| 6165 | APPENDIX 5: IMMEDIATE POST BIOPSY QUESTIONNAIRE.....                                      | 83        |
| 6166 | APPENDIX 6: 30-DAY POST BIOPSY QUESTIONNAIRE.....                                         | 86        |
| 6167 |                                                                                           |           |
| 6168 |                                                                                           |           |
| 6169 |                                                                                           |           |
| 6170 |                                                                                           |           |

---

#### 4. Abbreviations and definitions

|      |                               |                                                     |
|------|-------------------------------|-----------------------------------------------------|
| 6171 |                               |                                                     |
| 6172 | <b>Abbreviations:</b>         |                                                     |
| 6173 |                               |                                                     |
| 6174 | ADC                           | Apparent diffusion coefficient                      |
| 6175 | CI                            | Confidence interval                                 |
| 6176 | CRF                           | Case report form                                    |
| 6177 | DSMC                          | Data Safety and Monitoring Committee                |
| 6178 | DRE                           | Digital rectal examination                          |
| 6179 | DWI                           | Diffusion weighted imaging                          |
| 6180 | DCE                           | Dynamic contrast enhancement                        |
| 6181 | EDC                           | Electronic Data Capture                             |
| 6182 | ITT                           | Intention to treat                                  |
| 6183 | MCCL                          | Maximum cancer core length                          |
| 6184 | MPMRI                         | Multi-parametric MRI, used interchangeably with MRI |
| 6185 |                               | in this protocol.                                   |
| 6186 | MPMRI-TB                      | Multi-parametric magnetic resonance image-targeted  |
| 6187 |                               | biopsy of the prostate                              |
| 6188 | MRI                           | Magnetic resonance imaging, used interchangeably    |
| 6189 |                               | with MPMRI in this protocol                         |
| 6190 | MRI-TB                        | Magnetic resonance imaging targeted biopsy          |
| 6191 | MRS                           | Magnetic resonance spectroscopy                     |
| 6192 | PI                            | Principal Investigator                              |
| 6193 | PI-RADS                       | Prostate Imaging Reporting and Data System          |
| 6194 | PTC                           | Permission to Contact                               |
| 6195 | PSA                           | Prostate specific antigen                           |
| 6196 | REB                           | Research Ethics Board                               |
| 6197 | STARD                         | Standards for the reporting of diagnostic studies   |
| 6198 | TRUS                          | Trans-rectal ultrasound                             |
| 6199 | TSC                           | Trial Steering Committee                            |
| 6200 | T2W                           | T2-weighted imaging                                 |
| 6201 |                               |                                                     |
| 6202 |                               |                                                     |
| 6203 | <b>Definitions:</b>           |                                                     |
| 6204 |                               |                                                     |
| 6205 | MPMRI-targeted biopsy         | A biopsy technique where an MPMRI scan is           |
| 6206 |                               | used to determine the location of a suspicious      |
| 6207 |                               | target prior to biopsy.                             |
| 6208 |                               |                                                     |
| 6209 | Systematic TRUS guided biopsy | A biopsy approach where conduct of procedure        |
| 6210 |                               | is not influenced by findings on MRI imaging.       |
| 6211 |                               | Currently this is the standard of care for          |
| 6212 |                               | prostate cancer in the province of Ontario.         |
| 6213 |                               |                                                     |
| 6214 |                               |                                                     |
| 6215 |                               |                                                     |

6216  
6217

---

## 5. Trial summary

### 5.1 Aim and Rationale

6219

6220 The standard pathway for prostate cancer diagnosis is trans-rectal ultrasound guided  
6221 (TRUS) biopsy of the prostate following an elevated PSA. TRUS guidance is  
6222 performed primarily for anatomic guidance as the ultrasound poorly discriminates  
6223 between cancerous and non-cancerous tissue. TRUS guided prostate biopsies are  
6224 concentrated in areas of the peripheral zone, thought to harbor the majority of  
6225 cancer.

6226

6227 An alternative pathway for prostate cancer diagnosis in men with elevated PSA is to  
6228 perform multi-parametric magnetic resonance imaging (MPMRI) to localize cancer.  
6229 This information is used to direct a subsequent biopsy, known as an MRI-targeted  
6230 biopsy. MRI-targeted biopsy has been shown in preliminary studies to detect a  
6231 similar or greater amount of clinically significant cancer than systematic TRUS guided  
6232 biopsy and has several other potential advantages including: the ability to  
6233 differentiate between clinically significant and insignificant cancer, reducing  
6234 unnecessary biopsy and fewer numbers of biopsy cores, reducing biopsy-related  
6235 side-effects.

6236

6237 A 'clinically insignificant cancer' is cancer that is unlikely to progress or to affect an  
6238 individual's life expectancy and therefore does not warrant treatment. However  
6239 when diagnosed with low grade cancer that is likely to be insignificant, a large  
6240 proportion of subjects request treatment in case a more significant cancer is  
6241 present[1]. A challenge in this area is that subjects are typically not aware that their  
6242 cancer is clinically insignificant, and often view the early diagnosis and aggressive  
6243 treatment they have been subjected to as life-saving.

6244 A prostate cancer detection procedure that differentiates clinically significant cancer  
6245 from clinically insignificant cancer is therefore a major unmet need.

6246

6247 The potential implications of this trial include:

6248

6249

6250

6251

6252

6253

6254

6255

6256

6257

6258

- A redefinition of the prostate cancer diagnostic pathway;
- A reduction in the number of subjects undergoing prostate biopsy;
- A reduction in the number of biopsy cores taken per subject;
- A reduction in biopsy-related adverse events including sepsis and pain;
- A reduction in the over-diagnosis of clinically insignificant prostate cancer;
- A reduction in the economic burden of diagnosing and treating prostate cancer.

---

## 5.2 Methods

6259  
6260  
6261  
6262  
6263  
6264  
6265  
6266  
6267  
6268  
6269  
6270  
6271  
6272  
6273  
6274  
6275  
6276  
6277  
6278  
6279  
6280  
6281  
6282  
6283  
6284  
6285  
6286  
6287  
6288  
6289  
6290  
6291  
6292  
6293  
6294  
6295  
6296  
6297  
6298  
6299  
6300  
6301  
6302  
6303  
6304  
6305

Men referred with clinical suspicion of prostate cancer who have had no prior biopsy are randomized to either systematic TRUS guided biopsy(standard of care) or to a multi-parametric MRI (MPMRI) arm (the investigational arm). In the MRI arm, areas of the prostate are scored on a 5-point scale of suspicion for clinically significant cancer based on the Prostate Imaging Reporting and Data System

(PI-RADS) v2[2]:

PI-RADS 1 – Very low (clinically significant cancer is highly unlikely to be present)

PI-RADS 2 – Low (clinically significant cancer is unlikely to be present)

PI-RADS 3 – Intermediate (the presence of clinically significant cancer is equivocal)

PI-RADS 4 – High (clinically significant cancer is likely to be present)

PI-RADS 5 – Very high (clinically significant cancer is highly likely to be present)

Each suspicious area will be given a separate score as described by consensus meeting recommendations [2, 3]. Lesions scoring 3, 4 or 5 will undergo targeted biopsy; up to three suspicious areas will be targeted.

In the control arm, subjects will undergo a standard 12 core systematic TRUS guided biopsy as per standard recommendations[4]. Suspicious sono graphic lesions will be targeted (12 cores *in toto*).

Pathologic findings from all biopsies will be recorded and will undergo statistical analysis (see statistics section, 14.0).

In both arms, self-reported questionnaires to capture biopsy-specific side effects will be administered immediately post-procedure, and at the post-procedure appointment which will take place 3 weeks ( $\pm$  1 week) after the procedure. Euro QOL group 5 domain EQ-5D-5L questionnaires or a comparable QOL instrument will also be completed at baseline (prior to MRI or TRUS biopsy), 24 hours post MRI and 24 hours post-biopsy. Men will be followed up for 30-days post intervention and until a treatment decision is made and recorded. Pathology results from men requiring a radical prostatectomy will be recorded.

Men will complete the trial after they complete treatment for prostate cancer (radical prostatectomy) or the required follow-up procedures for each arm are met (see study timelines, section 9.3). Once men complete the trial, they revert to standard of care.

Annual questionnaires will be administered for all men with negative biopsy in both arms during a two-year follow-up period to determine cancer and treatment status.

No diagnostic test is perfect, and even with the best test some cancers may be missed. To minimize the risk of false negatives, men with negative biopsy results will

---

6306 be followed with serial PSA testing; PSA levels will increase if cancer is present. In  
6307 addition to serial PSA testing, in this study men who had a negative MRI (defined as  
6308 no cancer detected) and do not have a biopsy will have a follow up MRI at 24  
6309 months.

6310  
6311 As recruitment is expected to take up to 24 months (see section 7.6) and each  
6312 subject will be followed up for two years, the estimated maximal duration of this  
6313 study is four years in total. The primary endpoint will be reached at approximately 2  
6314 years after study initiation.

### 6315 **5.3 Participating Sites**

6316 This is a multi-centre study. Institutions participating in the study must be able to  
6317 perform both the systematic TRUS guided biopsy and the MRI-TB. They must be able  
6318 to randomize men to one of these two diagnostic tests.

6319  
6320 We expect to recruit 3-6 subjects per month per site, based on recruitment rates  
6321 from previous diagnostic trials performed by the centers involved. A typical centre  
6322 sees 15-30 eligible men per month. We expect 5 recruitment sites, with 100 men to  
6323 be recruited at each site over an 18-24 month period (see section 7.6).

### 6324 **5.4 Study outcomes**

#### 6325 **5.4.1 Primary outcome**

6326 To determine whether the proportion of men with clinically significant cancer  
6327 (Gleason  $\geq 7$ ) detected by MRI-targeted biopsy is no less than systematic TRUS  
6328 guided biopsy.

#### 6329 **5.4.2 Secondary outcomes**

6330 27. To determine whether the proportion of men with clinically significant cancer  
6331 (Gleason  $\geq 7$ ) detected by MRI-targeted biopsy is greater than systematic TRUS  
6332 guided biopsy.

6333 28. Proportion of men in each arm with clinically insignificant cancer detected.

6334 29. Proportion of men in each arm with Gleason  $\geq 4+3$  detected.

6335 30. Proportion of men in MRI arm who avoid biopsy.

6336 31. Proportion of men in the MRI arm whom the PI-RADS score for suspicion of  
6337 clinically significant cancer was 3, 4 or 5 but no clinically significant cancer was  
6338 detected.

6339 32. Proportion of men in each arm who go on to definitive local treatment (e.g.  
6340 radical prostatectomy, radiotherapy, brachytherapy) or systemic treatment (e.g.  
6341 hormone therapy, chemotherapy).

6342 33. Proportion of men with a negative MRI who develop a positive MRI and/ or  
6343 Gleason  $\geq 7$  cancer by 2 years.

6344 34. Proportion of men with post-biopsy adverse events

6345 35. Health-related quality of life scores.

6346 36. Proportion with Gleason grade upgrading in men undergoing radical  
6347 prostatectomy.

6348 37. To determine the cost per diagnosis of cancer.

- 
- 6349 38. To determine the impact of the addition of Gd based contrast compared to a non  
6350 contrast abbreviated MRI protocol on target yield  
6351 39. To determine if a radiologist Likert score not based on Pi-Rads has a better target  
6352 yield than Pi\_Rads alone  
6353  
6354

## 6355 **6. Background**

### 6356 **6.1 Prostate cancer diagnosis**

6357 Prostate cancer is the most common male cancer in the Western world with an  
6358 incidence of 24,000 new cases in Canada and 233,000 in the USA[5, 6]. It is the  
6359 second most common cause of cancer death in European and North American men,  
6360 with 2,900 deaths per year in Canada and 90,000 deaths per year in Europe[5, 6].  
6361 The incidence of the disease has increased by 22% over the last decade due to the  
6362 widespread use of the prostate specific antigen (PSA) blood test; by 2030 the  
6363 Canadian Cancer Society estimates the incidence of prostate cancer will be 42,225.As  
6364 prostate cancer is a histopathological diagnosis, men with raised PSA or abnormal  
6365 digital rectal examination (DRE) are usually referred for a prostate biopsy. Over one  
6366 million prostate biopsies are performed in North America and Europe every year[7].  
6367

### 6368 **6.2 Clinically significant versus clinically insignificant prostate cancer**

6369  
6370 Clinically significant prostate cancer is cancer that is likely to progress and affect a  
6371 man's life expectancy if left untreated. Though there is no universally agreed upon  
6372 definition on what histological parameters define clinically significant cancer, most  
6373 agree that larger volume cancers with a higher Gleason grade are more likely to be  
6374 clinically significant; an historically accepted threshold is a tumour volume above  
6375 0.5milliliters or any Gleason pattern 4 or 5 cancer[8-11].  
6376

6377 This definition is likely overly stringent. An increasing consensus views all Gleason  
6378 pattern 3 (Gleason score 6) cancers and many Gleason3 plus small amounts of  
6379 pattern 4 cancers as likely insignificant[12]. About half of newly diagnosed prostate  
6380 cancers fall into this category, and are unlikely to progress and affect a man's life  
6381 expectancy if left untreated. The widespread use of PSA testing has led to more men  
6382 being diagnosed with insignificant cancer that does not warrant any treatment [13];  
6383 however they are typically monitored closely with active surveillance. This is  
6384 associated with anxiety about harbouring untreated cancer, and the negative  
6385 psychological effects of being a 'survivor' [14]. Men diagnosed with low risk prostate  
6386 cancer are also subjected to serial biopsies and other tests, requiring long term  
6387 follow up. Further, many men with low risk disease receive radical treatment, either  
6388 because their physicians are not advocates of surveillance or because of anxiety  
6389 [15].These treatments may expose them to morbidity including urinary incontinence  
6390 and erectile dysfunction [16]. Thus, diagnostic tests that clearly differentiate  
6391 clinically significant cancer from clinically insignificant cancer will help reduce patient  
6392 anxiety, alleviate further testing, and avoid radical treatment and associated  
6393 morbidities.

---

### 6395 **6.3 Current standard of care: systematic TRUS guided biopsy**

6396 The European association of Urology and NICE guidelines recommend systematic  
6397 TRUS guided biopsy as the current standard of care for the diagnosis of prostate  
6398 cancer [4, 17]. This procedure has several advantages: it can be delivered quickly in  
6399 an outpatient clinic under local anesthetic, it can be offered at most Urology centres,  
6400 and the expertise is widely distributed.

6401  
6402 Limitations of systematic TRUS guided biopsy are as follows: the procedure requires  
6403 the operator to take 10-12 samples in the peripheral zone, where it is thought that  
6404 the majority of prostate cancer can be found (See Appendix 2)[18]. The ultrasound  
6405 guidance used during the procedure is useful for visualizing the prostate and  
6406 assessing the location of the needle within the prostate but has a poor ability to  
6407 discriminate tumour from normal tissue [19], which means that the systematic TRUS  
6408 guided biopsy can potentially miss some cancer. Systematic TRUS guided biopsy has  
6409 been shown to have a high false negative rate of 30-45% [20, 21]. As a systematic  
6410 TRUS guided biopsy is not specifically targeted to the location of a suspected  
6411 significant cancer, there is also a greater chance that a significant cancer may be  
6412 missed.

### 6413 **6.4 The emerging role of MRI in prostate cancer diagnosis and** 6414 **treatment**

#### 6415 **6.4.1 The role of imaging in prostate cancer diagnosis**

6416 Although used to diagnose many other solid organ cancers such as breast, renal and  
6417 colorectal cancer, imaging is not part of the traditional prostate cancer diagnostic  
6418 pathway. Imaging in prostate cancer, is typically limited to stage the disease  
6419 following histological diagnosis. Magnetic resonance imaging (MRI) is used in many  
6420 centres to assess for extra-capsular extension during prostate cancer staging. In the  
6421 past five years however, the possibility of using multi-parametric MRI (MPMRI) for  
6422 diagnosing prostate cancer prior to biopsy, has generated tremendous interest[22].

#### 6423 **6.4.2 Limitations of early MRI studies in prostate cancer**

6424 Early literature reported conflicting results on the ability of MRI to detect prostate  
6425 cancer. A recent systematic review of the literature showed that the quality of  
6426 studies evaluating MRI was disappointing [22]. Limitations of reported studies  
6427 include:

- 6428 • **Poor reporting standards.** Many early studies failed to closely follow  
6429 published guidelines for the standards of reporting of diagnostic studies  
6430 (STARD) [23].
- 6431 • **Biopsy artifact.** The majority of early studies evaluated MRI after biopsy.  
6432 Evidence has shown that post-biopsy hemorrhage can remain for several  
6433 months and affect interpretation of the image [24].
- 6434 • **Poor reference standards.** Many early studies use systematic TRUS guided  
6435 biopsy as a reference standard, which due to its limitations, can influence the  
6436 validity of the index test of MRI. Using radical prostatectomy specimens as



---

6437 reference standards can lead to a selection bias, as MRI is only validated in  
6438 men with disease characteristics that require radical prostatectomy. Further,  
6439 correlation of radical prostatectomy specimen with an MRI image is not  
6440 without difficulty given the shrinkage (10-20%), distortion, absent perfusion,  
6441 orientation and tissue loss as a result of specimen trimming.

- 6442 • **Incomplete analysis of the prostate.** Many early studies only evaluate the  
6443 validity of MRI in the peripheral zone, even though studies have shown that  
6444 around 25% of prostate cancers may be located in the transition zone [18].
- 6445 • **Segmentation.** Many early studies artificially divide the prostate into a  
6446 number of segments in order to increase the amount of data obtained and  
6447 the power of the analysis. Segments should not be treated as independent  
6448 regions of interest, and this should be factored into the analysis.

6449

### 6450 **6.4.3 Emerging role of MRI in the diagnosis of prostate cancer**

6451 Since the publication of these early reports, improvements in diagnostic technology  
6452 have changed the field and more evidence supporting the role of pre-biopsy MRI has  
6453 been published. Magnetic field strength has increased from 0.5 Tesla to 1.5 Tesla  
6454 and 3.0 Tesla. The introduction of shorter pulse sequences allows faster image  
6455 acquisition and the addition of functional sequences including magnetic resonance  
6456 spectroscopy (MRS), diffusion weighted imaging (DWI) and dynamic contrast  
6457 enhanced imaging (DCE). Clinicians are increasingly aware of and are accounting for  
6458 biopsy artifacts.

6459  
6460 The combination of anatomical sequences (T2-weighted imaging) and functional  
6461 sequences (MRS and/or DWI and/or DCE) is termed multi-parametric MRI.  
6462 Combining the sequences improves the validity of the test [25, 26].

6463  
6464 A systematic review determined that 60% of men with a clinical suspicion of prostate  
6465 cancer will have a suspicious area identified on MRI [27]. In studies correlating MRI  
6466 with radical prostatectomy specimens, MRI demonstrates sensitivity, specificity,  
6467 positive predictive value and negative predictive value of 90%, 88%, 77% and 95%  
6468 respectively for the identification of prostate tumours greater than 0.5ml [28].  
6469 Systematic reviews and meta-analysis of recent studies have demonstrated  
6470 sensitivity and specificity consistently between 70-90% for the detection of clinically  
6471 significant prostate cancer[26, 29-31].

6472  
6473 As a result of this accumulating evidence, MRI is increasingly used in clinical practice  
6474 in the diagnostic pathway for prostate cancer. The results of MRI can influence the  
6475 decision to perform a prostate biopsy, as well as the technique and targeting used  
6476 during the biopsy.

6477  
6478 MRI has tremendous potential to enhance the outcome of men on active  
6479 surveillance. 30% of men diagnosed with low risk prostate cancer (Gleason 6, PSA <  
6480 10) harbor higher-grade disease. This occult high-grade disease "*the wolf in sheep's*  
6481 *clothing*", is responsible for the 3-5% of prostate cancer deaths that have been  
6482 reported in long term surveillance series that did not incorporate MRI[32, 33]. The  
6483 early use of MRI in men on surveillance has the potential both to reduce the need

---

6484 for confirmatory biopsies, and to identify the *wolf in sheep's clothing* earlier, prior to  
6485 the development of metastasis.

6486

6487 This was the rationale for the very successful ASIST study, which recently successfully  
6488 completed its accrual. The ASIST study was led by Dr. Klotz (PI), and sponsored *in*  
6489 *toto* by the Ontario Institute of Cancer Research. The project was managed by the  
6490 Canadian Urology Research Consortium (CURC). It randomized 273 men recently  
6491 diagnosed with low risk prostate cancer, on surveillance, between systematic  
6492 confirmatory biopsy and MRI with targeted and systematic biopsy. The primary end  
6493 point, similar to PRECISE, was the proportion of men in each group with Gleason 7 or  
6494 higher prostate cancer. The study had numerous secondary end points and  
6495 correlative science components. We expect to report the initial results by 3Q  
6496 2016. We believe that the success and potential impact of the ASIST trial has created  
6497 strong momentum to proceed with the PRECISE trial, which has even greater  
6498 potential to substantially influence prostate cancer screening and diagnosis.

#### 6499 **6.4.3.1 MRI can influence the decision to perform a prostate biopsy**

6500 With reported negative predictive values of 95% [28, 34,35], MRI can help determine  
6501 whether a prostate biopsy is necessary; if the MRI does not identify a suspicious area  
6502 the biopsy can be avoided. Using MRI, 40-50% of men referred with clinical suspicion  
6503 of prostate cancer might avoid a biopsy [27]. The recent National Institute for Health  
6504 Research (NIHR) Health Technology Assessment (HTA) report [11] acknowledged the  
6505 value of MRI in this context. The NIHR HTA report suggests that using MRI to reduce  
6506 the number of men who undergo biopsy, can be cost effective despite the costs  
6507 associated with MRI[11]. Cost savings for the publically funded health care system  
6508 accrue as a result of reduced number of biopsies and costs of attendant  
6509 complications, and reduced treatment of clinically insignificant cancer.

#### 6510 **6.4.3.2 MRI can influence the biopsy technique**

6511 For men who receive a MRI scan and then go on to biopsy of the prostate, the MRI  
6512 information is used to influence the prostate biopsy technique. This is known as MRI-  
6513 targeted biopsy (MRI-TB) of the prostate, and can be carried out in a number of  
6514 ways.

6515

6516 The biopsy operator can use the MRI images or report to direct biopsies into the  
6517 area of the prostate where the tumour is located. The location of the tumour on the  
6518 MRI (carried out in advance) is registered to the real-time ultrasound images with  
6519 the use of software (software assisted registration or image-fusion) or without the  
6520 use of software (visual registration or cognitive registration), while the prostate is  
6521 visualized in real-time using trans rectal ultrasound. MRI-TB can also be conducted  
6522 directly "in-bore", where the biopsy is conducted within an MRI scanner where the  
6523 target identified on MRI during a prior diagnostic scan is biopsied using guidance  
6524 from serial MRI scans during the biopsy procedure, performed in an open magnet.

6525

6526 For the PRECISE study, the biopsy will be performed using an image fusion-targeting  
6527 device. Two devices have been FDA approved: the Artemis, made by Eigen, and the  
6528 Urostation, made by Koelis. These devices import the MR target into the TRUS  
6529 image, and direct the biopsy needle into the target.

---

6530 **6.4.4 Prostate cancer detection rates of MRI-targeted biopsy are**  
6531 **similar to other methods**

6532 A systematic review determined that 60% of men with a clinical suspicion of prostate  
6533 cancer will have a suspicious area identified on MRI [27]. One study found that a  
6534 prostate biopsy strategy using only MPMRI-targeted cores resulted in the same  
6535 detection rate of clinically significant cancer as 20-sector transperineal biopsies[36].  
6536 Other studies also show that a targeted-alone approach would detect a similar  
6537 amount of clinically significant cancer when compared to a 10-12 core systematic  
6538 TRUS guided biopsy[37]. A targeted-alone approach detects 17% less clinically  
6539 insignificant cancer compared to systematic TRUS guided biopsy[38].

6540  
6541 The detection rates achieved with a targeted-alone biopsy strategy require fewer  
6542 biopsy cores than systematic TRUS guided biopsy. Thus on a per-core analysis,  
6543 targeted biopsy is more efficient than systematic TRUS guided biopsy, with cancer  
6544 detected in 30% of all targeted cores in a pooled analysis of 1252 targeted cores  
6545 compared to 7% of all systematic TRUS guided biopsy cores in a pooled analysis of  
6546 5441 systematic cores [27]. As well, the MRI targeted biopsy provides more material  
6547 for histopathological analysis as the maximum cancer core length obtained from  
6548 targeted biopsies can be greater than that obtained from systematic biopsies[37].

6549  
6550 Robust comparative evidence from randomized controlled trials is needed to  
6551 determine if MRI scans can improve our ability over systematic TRUS guided biopsy  
6552 to diagnose clinically significant cancer and our ability to avoid detecting clinically  
6553 insignificant cancer.

6554

6555 **6.4.5 Limitations of studies reporting MPMRI-targeted prostate biopsy**

6556 Despite encouraging results of MRI-targeted biopsy, it is not yet part of routine  
6557 clinical practice for prostate cancer diagnosis. Most existing studies have cohort  
6558 study designs which make interpretation difficult as they do not conform well to  
6559 STARD [23] recommendations [27]. Limitations of these studies include:

- 6560 • **Broad definition of the study population.** The cancer detection rates depend on  
6561 the prevalence of the condition in the population being investigated. This varies  
6562 amongst men with no prior biopsy, prior negative biopsy and prior positive  
6563 biopsy. In many studies the detection rates are not attributable to a clearly  
6564 defined population.
- 6565 • **MRI conduct and reporting.** The detail in which MRI is conducted and  
6566 interpreted varies greatly amongst published studies.
- 6567 • **Reporting of cancer detection.** The cancer detection by systematic and targeted  
6568 cores is not always presented separately and cancer detection is not always  
6569 specified by clinical significance. These are both essential in order to evaluate the  
6570 technique.

6571 There is a strong need for a randomized controlled trial comparing MRI-targeted  
6572 biopsy to systematic TRUS guided biopsy so that the role of this technique in clinical  
6573 practice can be established.

---

6574 **6.5 Novelty of PRECISE**

6575 PRECISE is the first randomized study in biopsy-naïve men in which men are  
6576 randomized to an MRI targeted-alone biopsy arm (i.e. no biopsies of MR-normal  
6577 areas of prostate and no biopsy at all if the MR is non-suspicious) or a systematic  
6578 TRUS guided biopsy arm. This will allow evaluation of the efficacy of the MRI-  
6579 targeted biopsy approach in the detection of clinically significant cancer. In order to  
6580 evaluate a biopsy technique that could replace standard of care, the standard of care  
6581 test, i.e. systematic TRUS guided biopsy, must be included in one of the arms to  
6582 allow a direct comparison.

6583

6584 Other constituencies with an interest in MRI in prostate cancer (University College,  
6585 London; Lille, France; Oslo, Norway; Heidelberg, Germany; New York University, New  
6586 York) have considered similar studies, however in these centres MRI has largely  
6587 replaced systematic TRUS guided biopsy, notwithstanding the lack of evidence to  
6588 date. As a result, these centres have acknowledged that randomization to a standard  
6589 biopsy arm (ie systematic TRUS guided biopsy) would no longer be feasible as  
6590 equipoise has been lost.

6591

6592 In Ontario, and in almost all other Canadian provinces, prostate MPMRI is not  
6593 recommended for the indication of an elevated PSA in men who have not had a  
6594 biopsy. In this country, men at risk for prostate cancer, in almost all cases, proceed  
6595 to a TRUS guided systematic biopsy. We believe that the opportunity to avoid a  
6596 biopsy will make entry into this trial very appealing to potential candidates. Further,  
6597 the barriers, both financial and physical, to obtaining a quality MRI outside of the  
6598 health care system are substantial. Thus we believe men who are randomized to the  
6599 systemic biopsy arm will in almost all cases proceed with biopsy avoiding significant  
6600 contamination (i.e. men randomized to the systematic biopsy arm seeking out an  
6601 MRI instead).

6602

6603 **7. Trial objectives**

6604 **7.1 Overall aim**

6605 The aim of this study is to assess the efficacy of MRI-targeted biopsy compared to  
6606 standard of care systematic TRUS guided biopsy in the detection of clinically  
6607 significant and clinically insignificant prostate cancer in men without prior biopsy.  
6608 The implication of this trial is that MRI-targeted biopsy could replace systematic  
6609 TRUS guided biopsy as the standard of care in the diagnosis of prostate cancer.

6610 **7.2 Hypotheses**

6611 The proportion of men with clinically significant cancer detected by MRI-targeted  
6612 biopsy will be no less than that detected by systematic TRUS guided biopsy.

6613 **7.3 Primary Objective**

6614 To determine whether the proportion of men with clinically significant cancer  
6615 (Gleason  $\geq$  7) detected by MRI-targeted biopsy is no less than systematic TRUS  
6616 guided biopsy.

---

## 6617 **7.4 Secondary Objectives**

- 6618 40. To determine whether the proportion of men with clinically significant cancer  
6619 (Gleason  $\geq 7$ ) detected by MRI-targeted biopsy is greater than systematic TRUS  
6620 guided biopsy.
- 6621 41. Proportion of men in each arm with clinically insignificant cancer detected.
- 6622 42. Proportion of men in each arm with Gleason  $\geq 4+3$  detected.
- 6623 43. Proportion of men in MRI arm who avoid biopsy.
- 6624 44. Proportion of men in the MRI arm whom the PI-RADS score for suspicion of  
6625 clinically significant cancer was 3, 4 or 5 but no clinically significant cancer was  
6626 detected.
- 6627 45. Proportion of men in each arm who go on to definitive local treatment (e.g.  
6628 radical prostatectomy, radiotherapy, brachytherapy) or systemic treatment (e.g.  
6629 hormone therapy, chemotherapy).
- 6630 46. Proportion of men with a negative MRI who develop a positive MRI and/ or  
6631 Gleason  $\geq 7$  cancer by 2 years.
- 6632 47. Proportion of men with post-biopsy adverse events
- 6633 48. Health-related quality of life scores.
- 6634 49. Proportion with Gleason grade upgrading in men undergoing radical  
6635 prostatectomy.
- 6636 50. To determine the cost per diagnosis of cancer.
- 6637 51. To determine the impact of the addition of Gd based contrast compared to a non  
6638 contrast abbreviated MRI protocol on target yield
- 6639 52. To determine if a radiologist Likert score not based on Pi-Rads has a better target  
6640 yield than Pi\_Rads alone

6641  
6642

## 6643 **7.5 Explanation for non-inferiority hypothesis**

6644 Due to the putative advantages of MRI-TB in reducing the number of men who  
6645 require a biopsy, reducing the number of cores required in each man who is  
6646 biopsied, more accurate representation of disease burden, less insignificant disease  
6647 detected and reducing the number of men at risk of complications of biopsy, the  
6648 primary outcome of detection of clinically significant cancer in each arm will be  
6649 compared using a non-inferiority hypothesis. Even if a similar amount of clinically  
6650 significant cancer is identified by MRI-TB to systematic TRUS guided biopsy, these  
6651 advantages would support the use of MRI-TB instead of systematic TRUS guided  
6652 biopsy in clinical practice.

6653

## 6654 **7.6 Anticipated timeline of study progression**

6655 The study will commence once sponsorship, ethical approval and local approvals  
6656 have been obtained at a participating site and once site initiation training has  
6657 occurred and a letter of site activation has been issued from the coordinating centre.  
6658 Additional sites may join after the study has commenced. At this time, five sites will  
6659 participate. Assuming a minimum recruitment rate of 3-6 men per site per month,  
6660 recruitment will be complete by 24 months, if not sooner. If accrual is slower than  
6661 expected, an additional 1-2 sites will be recruited for year 2.

6662

---

| Month | Number of Sites | Total recruitment |
|-------|-----------------|-------------------|
| 0     | 2               | 0                 |
| 3     | 4               | 18-36             |
| 6     | 5               | 54-108            |
| 9     | 5               | 99-198            |
| 12    | 5               | 144-288           |
| 15    | 5               | 189-378           |
| 18    | 5               | 234-468           |
| 21    | 5               | 279-558           |
| 24    | 5               | 324-648           |

6663

## 6664 **8.Study Population**

### 6665 **8.1 Number of Subjects**

6666 Approximately 450 men with a clinical suspicion of prostate cancer, based on PSA or  
6667 results of digital rectal exam, with no prior biopsy will be eligible for participation.  
6668 Subjects must satisfy all inclusion and exclusion criteria. A sufficient number will be  
6669 enrolled (estimate: 450) to achieve at least 211 completed subjects per arm.

### 6670 **8.2 Subject inclusion criteria**

6671 In order to be eligible, all inclusion criteria must be met:

- 6672 13. Men at least 18 years of age referred with clinical suspicion of prostate cancer  
6673 who have been advised to have a prostate biopsy;
- 6674 14.  $\geq 5\%$  chance of high-grade prostate cancer as calculated using individualized risk  
6675 assessment of prostate cancer calculator, PCPTRC 2.0, found at  
6676 <http://deb.uthscsa.edu/URORiskCalc/Pages/calcs.jsp> For men under age 55,  
6677 the default age of 55 should be entered on the risk calculator.
- 6678 15. Serum PSA  $\leq 20$ ng/ml within 3 months of randomization
- 6679 16. Fit to undergo all procedures listed in protocol;
- 6680 17. Able to provide written informed consent.

### 6681 **8.3 Subject exclusion criteria**

6682 Men who meet the following criteria at the time of screening will be excluded:

- 6683 13. Prior prostate biopsy
- 6684 14. Prior treatment for prostate cancer
- 6685 15. Contraindication to MRI (e.g. claustrophobia, pacemaker, estimated GFR  
6686  $\leq 50$ mls/min)
- 6687 16. Contraindication to prostate biopsy
- 6688 17. Men in whom artifact would reduce the quality of the MRI, i.e. previous hip  
6689 replacement surgery, metallic hip replacement or extensive pelvic orthopaedic  
6690 metal work
- 6691 18. Unfit to undergo any procedures listed in protocol.
- 6692

---

6693 **9. Study design**

6694 **9.1 Study design**

6695 The study is a multi-centre, open-label randomized controlled trial, with men  
6696 randomized in a 1:1 ratio to one of two arms (see Trial Schema, section 9.2). Men in  
6697 Arm A will undergo a MRI followed by either a targeted biopsy of suspicious areas or  
6698 will be followed for two years if there is no suspicious areas identified by MRI. The  
6699 unbiopsied men will have a repeat MRI at 2 years. Men in Arm B will undergo a 12-  
6700 core systematic TRUS guided biopsy. All men in the study will be followed for two  
6701 years or until they have had radical treatment (whichever comes first).  
6702

6703  
6704  
6705

## 9.2 Study Trial Schema

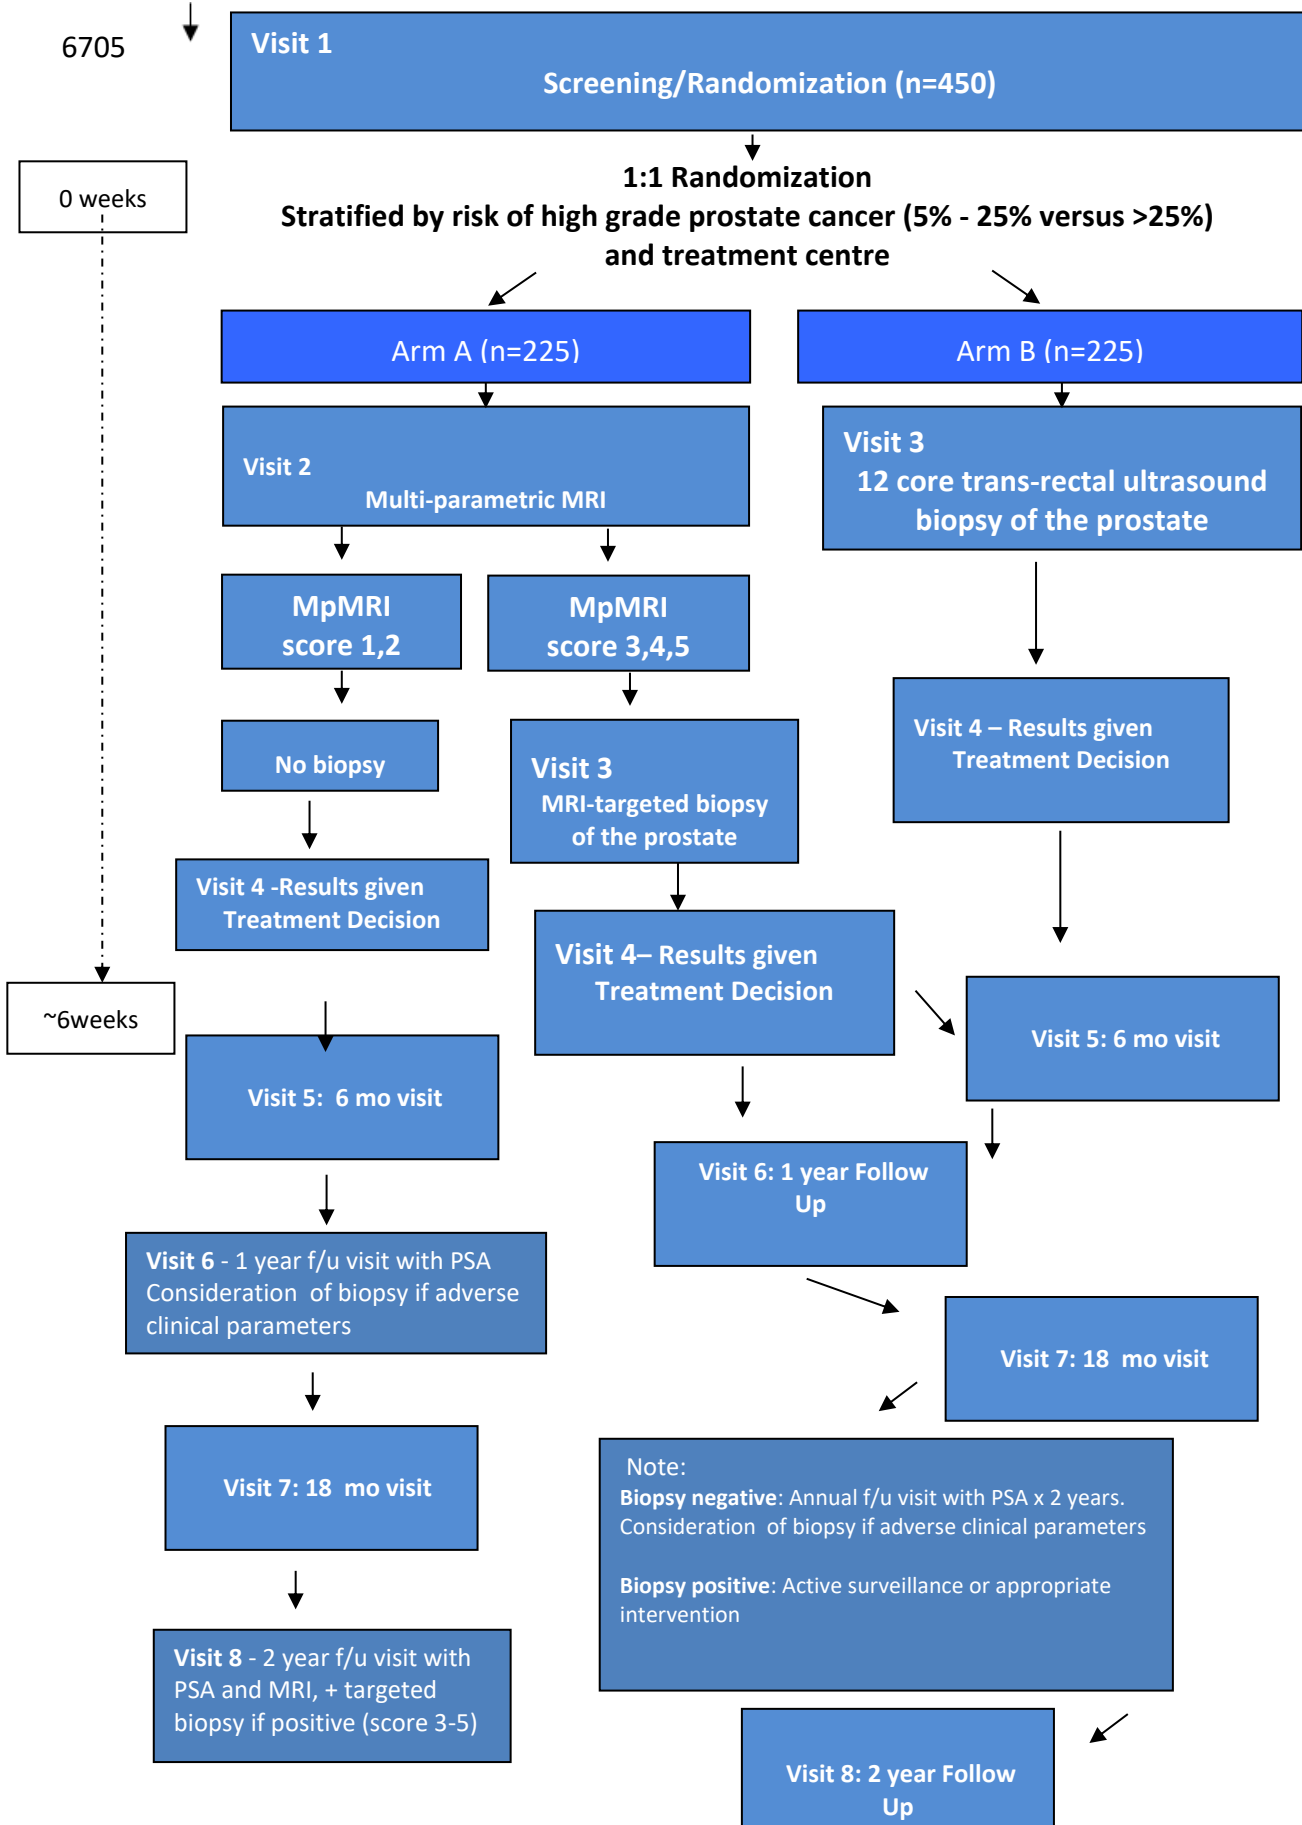



6706 **9.3 Timeline of subject contact**

6707 Tables 1, 2 and 3 illustrate the three individual subject pathways possible in the trial.

6708 The individual pathway that each subject experiences is dependent on both the arm  
6709 he is randomized to and results of the tests.

6710

6711 **Table 1: ARM A: Men randomized to MRI arm who have a normal MRI and do not require**  
6712 **a biopsy**

|                                              | Visit 1<br>Screening/<br>Randomization                  | Visit<br>2<br>MRI | Visit<br>3<br>N/A | Visit 4<br>Post-<br>Test | Visit 5<br>6 mos | Visit 6<br>1 year<br>follow<br>up | Visit 7<br>18<br>mos | Visit 8<br>2 year<br>follow<br>up |
|----------------------------------------------|---------------------------------------------------------|-------------------|-------------------|--------------------------|------------------|-----------------------------------|----------------------|-----------------------------------|
| <b>Weeks:</b>                                | 0                                                       | 1                 | 2                 | 5                        | 26               | 52                                | 78                   | 104                               |
| Consent                                      | X                                                       |                   |                   |                          |                  |                                   |                      |                                   |
| Screening<br>(eligibility review,<br>med hx, | X                                                       |                   |                   |                          |                  |                                   |                      |                                   |
| Vitals, DRE <sup>1</sup>                     | X                                                       |                   |                   |                          | X                | X                                 | X                    | X                                 |
| Randomization                                | X                                                       |                   |                   |                          |                  |                                   |                      |                                   |
| EQ-5D-5L                                     | X                                                       |                   |                   | X                        |                  |                                   |                      | X                                 |
| Correlative<br>sample collection:<br>• blood | X                                                       |                   |                   |                          | X                | X                                 | X                    | X                                 |
| • urine <sup>2</sup>                         | X                                                       |                   |                   |                          | X                | X                                 | X                    | X                                 |
| • semen <sup>3</sup>                         | X                                                       |                   |                   |                          |                  | X                                 |                      | X                                 |
| • tissue-<br>NA                              |                                                         |                   |                   |                          |                  |                                   |                      |                                   |
| Creatinine                                   | X                                                       |                   |                   |                          |                  |                                   |                      |                                   |
| PSA <sup>4</sup>                             | X                                                       |                   |                   |                          | X                | X                                 | X                    | X                                 |
| Systematic TRUS<br>guided biopsy             |                                                         |                   |                   |                          |                  |                                   |                      |                                   |
| MRI                                          |                                                         | X                 |                   |                          |                  |                                   |                      | X <sup>5</sup>                    |
| MRI-Targeted<br>Biopsy                       |                                                         |                   |                   |                          |                  |                                   |                      | X if<br>target                    |
| Immediate post-<br>biopsy<br>questionnaire   |                                                         |                   |                   |                          |                  |                                   |                      |                                   |
| Follow up for<br>results of tests            |                                                         |                   |                   | X                        |                  |                                   |                      |                                   |
| Treatment<br>decision <sup>6</sup>           |                                                         |                   |                   | X                        |                  |                                   |                      |                                   |
| 30-day post-<br>biopsy<br>questionnaire      |                                                         |                   |                   |                          |                  |                                   |                      |                                   |
| AE/SAE                                       | Complete as required at any time following registration |                   |                   |                          |                  |                                   |                      |                                   |
| Withdrawal Form                              | Complete as required at any time following registration |                   |                   |                          |                  |                                   |                      |                                   |
| ConMeds Form                                 | Complete as required at any time following registration |                   |                   |                          |                  |                                   |                      |                                   |

---

6713 <sup>1</sup>Urine sample will be required PRE and POST DRE, if subject has agreed to the Correlative  
6714 Science component. See correlative manual for instruction.  
6715 <sup>2</sup>Urine samples will be collected at select visits, this may include 2 samples, 'Random-First  
6716 catch' and post-DRE samples. See the Correlative Science Manual for further details on  
6717 collection and processing.  
6718 <sup>3</sup>Collected at baseline, and annually.  
6719 <sup>4</sup>PSA will have been done prior to visit 1 as part of screening.  
6720 <sup>5</sup> If MRI indicates a target, biopsy must be done  
6721 <sup>6</sup>After treatment decision men revert to standard of care.  
6722

6723  
6724

**Table 2: ARM A: Men randomized to MRI arm who have a lesion on MRI and require a biopsy**

|                                                 | Visit 1<br>Screening<br>/<br>Randomization              | Visit<br>2<br>MRI | Visit 3<br>Biopsy | Visit 4<br>Post-<br>test | Visit 5<br>6 mos | Visit 6<br>1 year<br>follow<br>up | Visit<br>7<br>18<br>mos | Visit 8<br>2 year<br>follo<br>w up |
|-------------------------------------------------|---------------------------------------------------------|-------------------|-------------------|--------------------------|------------------|-----------------------------------|-------------------------|------------------------------------|
| <b>Weeks:</b>                                   | 0                                                       | 1                 | 2                 | 6                        | 26               | 52                                | 78                      | 104                                |
| Consent                                         | X                                                       |                   |                   |                          |                  |                                   |                         |                                    |
| Screening<br>(eligibility<br>review, med hx)    | X                                                       |                   |                   |                          |                  |                                   |                         |                                    |
| Vitals, DRE <sup>1</sup>                        | X                                                       |                   |                   |                          | X                | X                                 | X                       | X                                  |
| Randomization                                   | X                                                       |                   |                   |                          |                  |                                   |                         |                                    |
| EQ-5D-5L                                        | X                                                       |                   |                   | X                        |                  |                                   |                         | X                                  |
| Correlative<br>sample<br>collection:<br>• blood | X                                                       |                   |                   |                          | X                | X                                 | X                       | X                                  |
| • urine <sup>2</sup>                            | X                                                       |                   |                   |                          | X                | X                                 | X                       | X                                  |
| • semen <sup>3</sup>                            | X                                                       |                   |                   |                          |                  | X                                 |                         | X                                  |
| • tissue <sup>4</sup>                           |                                                         |                   | X                 |                          |                  |                                   |                         | X                                  |
| Creatinine                                      | X                                                       |                   |                   |                          |                  |                                   |                         |                                    |
| PSA <sup>5</sup>                                | X                                                       |                   |                   |                          | X                | X                                 | X                       | X                                  |
| Systematic<br>TRUS guided<br>biopsy             |                                                         |                   |                   |                          |                  |                                   |                         |                                    |
| MRI                                             |                                                         | X                 |                   |                          |                  |                                   |                         | X <sup>6</sup>                     |
| MRI-Targeted<br>Biopsy                          |                                                         |                   | X                 |                          |                  |                                   |                         | X <sup>6</sup>                     |
| Immediate post-<br>biopsy<br>questionnaire      |                                                         |                   | X                 |                          |                  |                                   |                         |                                    |
| Follow up for<br>results of tests               |                                                         |                   |                   | X                        |                  |                                   |                         |                                    |
| Treatment<br>decision <sup>7</sup>              |                                                         |                   |                   | X                        |                  |                                   |                         |                                    |
| 30-day post-<br>biopsy<br>questionnaire         |                                                         |                   |                   | X                        |                  |                                   |                         |                                    |
| AE/SAE                                          | Complete as required at any time following registration |                   |                   |                          |                  |                                   |                         |                                    |
| Withdrawal<br>Form                              | Complete as required at any time following registration |                   |                   |                          |                  |                                   |                         |                                    |
| ConMeds Form                                    | Complete as required at any time following registration |                   |                   |                          |                  |                                   |                         |                                    |

6725  
6726  
6727  
6728  
6729  
6730  
6731  
6732  
6733  
6734  
6735  
6736  
6737  
6738  
6739  
6740  
6741  
6742  
6743  
6744  
6745  
6746  
6747  
6748  
6749  
6750  
6751  
6752  
6753  
6754  
6755  
6756  
6757  
6758  
6759  
6760  
6761  
6762  
6763  
6764  
6765  
6766  
6767  
6768  
6769  
6770  
6771  
6772  
6773  
6774  
6775

---

<sup>1</sup>Urine sample will be required PRE and POST DRE, if subject has agreed to the Correlative Science component. See correlative manual for instruction.

<sup>2</sup>Urine samples will be collected at select visits, this may include 2 samples, 'Random-First catch' and post-DRE samples. See the Correlative Science Manual for further details on collection and processing.

<sup>3</sup>Collected at baseline, and annually.

<sup>4</sup> tissue should be obtained if subject has agreed to the Correlative Science component. See correlative manual for instruction.

<sup>5</sup>PSA will have been done prior to visit 1 as part of screening.

<sup>6</sup>See protocol Section 10.11.1: If MRI indicates a target, biopsy must be done, and tissue obtained if subject has agreed to the Correlative Science component. See correlative manual for instruction.

<sup>7</sup>After treatment decision men revert to standard of care.

6776  
6777  
6778

**Table 3: ARM B: Men randomized to systematic TRUS guided biopsy arm**

|                                                 | Visit 1<br>Screening/<br>Randomization                     | Visit<br>2 | Visit 3<br>Biopsy | Visit 4<br>Post-<br>test<br>visit | Visit 5<br>6 mos | Visit<br>6<br>1<br>year<br>follo<br>w up | Visit 7<br>18<br>mos | Visit 8<br>2 year<br>follow<br>up |
|-------------------------------------------------|------------------------------------------------------------|------------|-------------------|-----------------------------------|------------------|------------------------------------------|----------------------|-----------------------------------|
| <b>Weeks:</b>                                   | 0                                                          | 1          | 2                 | 6                                 | 26               | 52                                       | 52                   | 104                               |
| Consent                                         | X                                                          |            |                   |                                   |                  |                                          |                      |                                   |
| Screening<br>(eligibility review,<br>med hx)    | X                                                          |            |                   |                                   |                  |                                          |                      |                                   |
| Vitals, DRE <sup>1</sup>                        | X                                                          |            |                   |                                   | X                | X                                        | X                    | X                                 |
| Randomization                                   | X                                                          |            |                   |                                   |                  |                                          |                      |                                   |
| EQ-5D-5L                                        | X                                                          |            |                   | X                                 |                  |                                          |                      | X                                 |
| Correlative<br>sample<br>collection:<br>• blood | X                                                          |            |                   |                                   | X                | X                                        | X                    | X                                 |
| • urine <sup>2</sup>                            | X                                                          |            |                   |                                   | X                | X                                        | X                    | X                                 |
| • semen <sup>3</sup>                            | X                                                          |            |                   |                                   |                  | X                                        |                      | X                                 |
| • tissue                                        |                                                            |            | X                 |                                   |                  |                                          |                      |                                   |
| Creatinine                                      | X                                                          |            |                   |                                   |                  |                                          |                      |                                   |
| PSA <sup>4</sup>                                | X                                                          |            |                   |                                   | X                | X                                        | X                    | X                                 |
| Systematic TRUS<br>guided biopsy                |                                                            |            | X                 |                                   |                  |                                          |                      |                                   |
| MRI                                             |                                                            |            |                   |                                   |                  |                                          |                      | X <sup>5</sup>                    |
| MRI-Targeted<br>Biopsy                          |                                                            |            |                   |                                   |                  |                                          |                      | X <sup>5</sup>                    |
| Immediate post-<br>biopsy<br>questionnaire      |                                                            |            | X                 |                                   |                  |                                          |                      |                                   |
| Follow up for<br>results of tests               |                                                            |            |                   | X                                 |                  |                                          |                      |                                   |
| Treatment<br>decision <sup>6</sup>              |                                                            |            |                   | X                                 |                  |                                          |                      |                                   |
| 30-day post-<br>biopsy<br>questionnaire         |                                                            |            |                   | X                                 |                  |                                          |                      |                                   |
| AE/SAE                                          | Complete as required at any time following<br>registration |            |                   |                                   |                  |                                          |                      |                                   |
| Withdrawal Form                                 | Complete as required at any time following<br>registration |            |                   |                                   |                  |                                          |                      |                                   |

|              |                                                         |  |  |  |  |
|--------------|---------------------------------------------------------|--|--|--|--|
| ConMeds Form | Complete as required at any time following registration |  |  |  |  |
|--------------|---------------------------------------------------------|--|--|--|--|

6779 <sup>1</sup>Urine sample will be required PRE and POST DRE, if subject has agreed to the Correlative  
6780 Science component. See correlative manual for instruction.

6781 <sup>2</sup>Urine samples will be collected at select visits, this may include 2 samples, 'Random-First  
6782 catch' and post-DRE samples. See the Correlative Science Manual for further details on  
6783 collection and processing.

6784 <sup>3</sup>Collected at baseline, and annually.

6785 <sup>4</sup>PSA will have been done prior to visit 1 as part of screening.

6786 <sup>5</sup>See protocol Section 10.11.1: If MRI indicates a target, biopsy must be done, and tissue  
6787 must be obtained if subject has agreed to the Correlative Science component. See  
6788 correlative manual for instruction.

6789 <sup>6</sup>After treatment decision men revert to standard of care.

6790

6791

## 6792 **10. Trial Interventions and procedures**

6793

6794 The following procedures will be applied as necessary to subjects enrolled in both  
6795 arm of the trial.

### 6796 **10.1 EQ-5D-5L Questionnaires**

6797

#### 6798 **For all subjects enrolled in trial**

6799 Once enrolled into the study, all men will be asked to fill out an EQ-5D-5L  
6800 questionnaire (Appendix 4), which is a validated 2-page questionnaire which aims to  
6801 evaluate health related quality of life. It takes approximately 2 minutes to complete.

- 6802 • All subjects should complete the baseline questionnaire at the screening visit  
6803 before leaving the department.
- 6804 • Subjects who have a normal MRI and do not require a biopsy will complete an  
6805 EQ-5D-5L questionnaire at Visit 4.
- 6806 • Subjects undergoing MRI-targeted biopsy or a systematic TRUS guided biopsy will  
6807 be given an EQ-5D-5L questionnaire to fill out at 30 days post biopsy. The date  
6808 that the subject should fill out the questionnaires should be written on top of the  
6809 questionnaire. (This can also be done at Visit 4).
- 6810 • All subjects should complete the EQ-5D-5L questionnaire at the 2 year follow up  
6811 visit.

6812

6813

### 6814 **10.2 Multiparametric MRI imaging procedure**

#### 6815 **For subjects in Arm A only**

6816

#### 6817 **10.2.1 MRI Protocol**

6818 A non-endorectal coil MRI will be carried out in 3.0 Tesla scanner with a pelvic  
6819 phased array coil and an automated injector system with the subject in the supine  
6820 position. T2-weighted (T2W), diffusion weighted (DWI) and dynamic contrast

---

6821 enhanced (DCE) scans will be acquired as per the requirements set out by PI-RADS  
6822 v2.  
6823  
6824 Within the specified PiRads-2 framework a common protocol will be formulated by a  
6825 consensus of the radiologists involved in the trial at each site at a startup meeting.  
6826 The highest agreed upon b-value image for DWI (at least 1400s/mm<sup>2</sup>) will be  
6827 selected for all sites to ensure consistency. Similarly, the spatial resolution, contrast  
6828 media, injection rates and dynamic scanning temporal resolution will be matched for  
6829 all sites. An optional multi b value DWI acquisition will be undertaken as well to  
6830 allow for ancillary studies into non log linear apparent diffusion coefficient (ADC)  
6831 models for tumor characterization. This is summarized in an MRI Operations Manual  
6832  
6833  
6834 Subjects will be asked to follow their local standard of care MRI examination  
6835 preparation instructions for the MRI procedure.

### 6836 **10.2.2 MRI reporting**

6837 The MRI will be reported by an experienced radiologist using the MRI Reporting  
6838 Proforma(See Appendix 2) to be filed in the study folder. The MPMRI will be scored  
6839 based on the PI-RADS v2 scoring system [2]. Radiologists will also provide a 5  
6840 pointLikert score for purposes of comparison. Biopsy decisions will be based on the  
6841 PiRads scores.

6842

6843

6844 Lesions in the prostate will be scored on the following scale:

6845 PI-RADS 1 – Very low (clinically significant cancer is highly unlikely to be  
6846 present)

6847 PI-RADS 2 – Low (clinically significant cancer is unlikely to be present)

6848 PI-RADS 3 – Intermediate (the presence of clinically significant cancer is  
6849 equivocal)

6850 PI-RADS 4 – High (clinically significant cancer is likely to be present)

6851 PI-RADS 5 – Very high (clinically significant cancer is highly likely to be  
6852 present)

6853

6854 The location of the suspicious areas in the prostate should be marked on a diagram  
6855 of the prostate (see Appendix2) and the sector numbers containing each suspicious  
6856 area should be recorded in the case report form.

6857

6858 Radiologists will be blinded to the PSA.

6859

6860

6861 Imaging interpretation will be carried out at each site, however ensuring consistency  
6862 and quality of imaging interpretation is crucial. A central imaging site will be  
6863 designated with a lead radiologist (Sunnybrook, MH). A single radiologist at each site  
6864 will perform the interpretation of all images for that site. The designated radiologist  
6865 must have experience of interpreting at least 200 MRI's using PI-RADS 1 or 2.A  
6866 startup meeting involving all radiologists will be held prior to start of accrual where  
6867 each site will bring 5 MRI cases performed at their site for consensus review, scoring

---

6868 and discussion. This will provide a commonality of approach to interpretation among  
6869 the radiologists before the study begins. After this startup meeting each site will  
6870 send one set of MRI images and its interpretation for central review for site  
6871 qualification.

6872  
6873 A copy of all images will be sent on CD/DVD to the central site for archiving.

### 6874 **10.3 No target identified on MPMRI (PiRads 1 or 2)**

#### 6875 **For subjects in Arm A only, who do not require a biopsy**

6876 Men who have MRIs that do not identify any suspicious lesion will not receive a  
6877 biopsy. These subjects will benefit from being part of the trial as a result of not  
6878 having to undergo an invasive biopsy procedure, avoiding the discomfort associated  
6879 with the procedure, the risk of being diagnosed with clinically insignificant cancer  
6880 and the risk of sepsis associated with the biopsy procedure. Studies suggest that if  
6881 the MRI does not identify areas suspicious for cancer there is an 85-95% chance that  
6882 clinically significant cancer is not present [28, 34, 35].

6883  
6884 As soon as the results of the MRI are discussed with the subject, their treatment  
6885 decision will be recorded and they will return to standard of care management. As  
6886 part of standard of care these subjects can undergo further PSA surveillance and / or  
6887 prostate biopsies if indicated.

### 6888 **10.4 MRI-Targeted biopsy**

#### 6889 **For subjects in Arm A who do require a biopsy**

#### 6890 **10.4.1 MRI choice of targets for targeted biopsy**

6891 Men whose prostates contain a suspicious area with a PI-RADS score of 3,4 or 5 will  
6892 subsequently undergo targeted biopsy by a Urologist or Radiologist experienced in  
6893 MRI-targeted biopsy. Operator experience (number of targeted biopsies performed  
6894 to date) will be recorded before each procedure. The number of biopsy operators  
6895 should be kept to the minimum number possible.

6896  
6897 Targets will be stratified by PI-RADS score and if the same score then by size and  
6898 labeled T1, T2, T3...etc. If there are more than 3 lesions with a score of 3 or more  
6899 only T1-T3 will be targeted. The radiologist should record the sectors involved with  
6900 tumor in order of most to least involved using the PI-RADS v2 sector scheme.  
6901 The number of biopsy operators should be kept to the minimum number possible.

6902  
6903 Subjects in the MRI cohort will not have systematic biopsies, with one exception.  
6904 Those whose MRI is grade 3M (a multifocal pattern suggesting multifocal small  
6905 volume cancer, with PSA Density >0.15 and no focal lesion), a systematic 12 core  
6906 biopsy will be conducted.

#### 6907 **10.4.2 MRI Biopsy**

6908 The procedure will be performed in the outpatient departments of sites possessing  
6909 the required equipment by a clinician competent in TRUS/MRI-targeted biopsy. An  
6910 operator must have performed at least 50 targeted biopsy cases on the TRUS/MRI



---

6911 fusion system at their institution before they are qualified to participate as an  
6912 operator in the study.  
6913  
6914 Coumarin anticoagulant, clopidogrel treatment and other relevant  
6915 anticoagulants/antiplatelets will be discontinued up to 10 days before biopsy and  
6916 advice sought as to appropriate substitutes if indicated. Aspirin will be continued at  
6917 the discretion of the physician doing the biopsy.  
6918  
6919 Prophylactic quinolone antibiotics shall be given as per local guidelines. Biopsies will  
6920 be performed via the trans-rectal route or via the trans-perineal route depending  
6921 upon local practice.  
6922  
6923 Targeted biopsies should be performed by software-assisted fusion devices  
6924 (i.e.(Artemis, made by Eigen, or Urostation, by Koelis)[34, 36, 37, 40,41].This  
6925 software is safe and poses no risks to the subject since the same CE-marked  
6926 ultrasound probes that are designed to perform the biopsy when performed as  
6927 standard of care biopsy are used during targeted biopsy. Should the operator wish to  
6928 not use the information provided by the software registration system and use  
6929 cognitive (visual) registration alone they can do so, but should indicate this on the  
6930 subject's case report form.  
6931  
6932 The samples per target will be 4cores spread across the target region for a maximum  
6933 total of 12 cores as a maximum of 3 targets can be identified. Biopsies should be  
6934 conducted in order meaning T1 then T2 then T3.  
6935  
6936 Biopsy cores from different suspicious areas will be aliquoted separately. The vials  
6937 will be labeled "T1a-d", "T2a-d" and "T3a-d" (according to how many targets there  
6938 are) which should match the assignment of suspicious areas by the radiologist on the  
6939 MRI report. The order of lettering a-d should match the order in which the biopsies  
6940 were performed in each region. The first biopsy should be at the center of the target  
6941 and the remaining fanning out from the center. Each core from the same suspicious  
6942 area must be submitted separately. Alternative methods of storing cores that allow  
6943 identification of the order of score samples from each target are acceptable.  
6944

## 6945 **10.5 Systematic TRUS guided biopsy**

### 6946 **For all subjects in Arm B**

6947 Systematic TRUS guided biopsy is the current standard of care for the diagnosis of  
6948 prostate cancer [4, 17]. Systematic TRUS guided biopsy can be performed at the local  
6949 site of recruitment.  
6950

6951 A clinician competent in systematic TRUS guided biopsy will perform the procedure.  
6952 The experience of the operator (number of systematic TRUS guided biopsies  
6953 performed to date) will be recorded prior to each procedure. Software that guides  
6954 clinicians in placing biopsy cores should not be used.  
6955

6956 Coumarin anticoagulant, clopidogrel treatment and other relevant  
6957 anticoagulant/antiplatelet medication will be discontinued5 to 10 days before biopsy

---

6958 and advice sought as to appropriate substitutes if indicated. Aspirin will be continued  
6959 at the discretion of the physician doing the biopsy.

6960

6961 The subject will be positioned in left lateral position. 10-12 core biopsies will be  
6962 taken as per guidelines [42] under appropriate anaesthesia. Biopsies will be directed  
6963 to the peripheral zone (See Appendix 3 for standardized method for conducting 12-  
6964 core systematic TRUS guided biopsy). Prophylactic quinolone antibiotics shall be  
6965 given as per local guidelines.

## 6966 **10.6 Pathology**

6967 The 2005 International Society of Urological Pathology guidelines for Gleason  
6968 Grading of Prostatic Carcinoma will be followed [43].

6969

6970 For men undergoing MRI-targeted biopsy it is required that pathology reported per  
6971 suspicious area targeted and per targeted core. For systematic TRUS guided biopsy,  
6972 each core will be reported and graded.

## 6973 **10.7 Post-procedural care**

### 6974 **For all subjects in ARMS A and B receiving a biopsy**

6975 After a biopsy procedure the subject can be discharged within 2-3 weeks for results  
6976 of the histopathology and treatment options to be discussed.

## 6977 **10.8 Immediate post-biopsy questionnaire**

### 6978 **For all subjects in ARMS A and B receiving a biopsy**

6979 A modified version of a self-reported questionnaire validated previously [39] in the  
6980 assessment of post-biopsy complications will be completed immediately post-biopsy  
6981 after MRI-TB and after systematic TRUS guided biopsy (Appendix 7). The subject  
6982 should complete the immediate post-biopsy questionnaire before they leave the  
6983 department. It aims to assess intensity of discomfort and pain associated with the  
6984 procedure.

## 6985 **10.9 30-day post-biopsy questionnaire**

### 6986 **For all subjects in ARMS A and B receiving a biopsy**

6987 A modified version of a self-reported questionnaire validated previously [39] in the  
6988 assessment of post-biopsy complications at 30 days post-biopsy should be given to  
6989 all subjects undergoing MRI-TB or systematic TRUS guided biopsy to take home  
6990 (Appendix 8). The subject should fill this out on day 30 following the procedure. It  
6991 should take 5 minutes to fill out. The date that the participant should complete the  
6992 questionnaire should be written on top of the questionnaire. Data on specific biopsy-  
6993 related complications including pain, fever, hematuria, hematochezia,  
6994 hematospermia, urinary retention and urinary incontinence will be recorded. Any  
6995 other adverse events will not be recorded. Contact with healthcare and resource  
6996 used data following the biopsy will also be ascertained. The completed questionnaire  
6997 can be returned to the investigator in a pre-addressed envelope.

6998

6999 Subjects should be reminded at 30 days to complete this questionnaire.

---

7000 **10.10 Results and treatment decision (Visit 4)**

7001 The results of the biopsies and/or MRI will be explained to the subject by the clinical  
7002 care team during this visit, which is approximately 2-3 weeks after the biopsy.

7003 The research team should record the treatment decision in the subject file.

7004 Possibilities for treatment decision include but are not limited to:

- 7005 • Further diagnostic test (e.g. PSA, biopsy, MRI)
- 7006 • Active Surveillance
- 7007 • Radical treatment (e.g. radical prostatectomy, radical radiotherapy)
- 7008 • Focal therapy (e.g. high intensity focused ultrasound, cryotherapy)
- 7009 • Hormone therapy

7010 **10.11 Follow up period**

7011 All study participants will be followed up for up to two years or until they have  
7012 radical treatment. Each year, subjects will be surveyed to obtain the following  
7013 information:

- 7014 • time to cancer diagnosis
- 7015 • Gleason score progression
- 7016 • time to intervention on active surveillance
- 7017 • time on active surveillance
- 7018 • PSA

7019

7020 **10.11.1 Indications for biopsies off protocol**

7021 For subjects who are not biopsied due to a negative MRI, have negative or non-  
7022 significant systematic biopsies, or who have a positive MRI but no or non-significant  
7023 cancer on targeted biopsy, the following are guidelines for subjects management  
7024 during the 2 year follow up period.

7025 It is an accepted standard of care in Ontario for subjects on active surveillance or  
7026 with a prior negative biopsy who have a worsening risk profile to undergo mpMRI  
7027 followed by targeted biopsy. We propose the following guidelines for risk profile  
7028 assessment and consideration of repeat biopsy

7029 Subjects should continue to be followed with semi-annual PSA and DRE. A biopsy  
7030 should be considered under one or more of the following circumstances:

- 7031 1. For men with PSA density < 0.15, biopsy if an increase in PSA density > 0.15.
- 7032 2. For men with PSA density > 0.15, or a baseline PSA > 10, biopsy if a 50% increase  
7033 in PSA in 1 year.
- 7034 3. Biopsy if a doubling of the risk of high grade cancer according to the NCI  
7035 nomogram.
- 7036 4. Biopsy if development of a suspicious nodule on DRE.
- 7037

---

7038 5. For men with a positive study MRI (especially PI-rads 4 or 5) and a targeted biopsy  
7039 which was negative or showed only Gleason 6 cancer, biopsy if there is a 50% or  
7040 more increase in PSA over 1 year or a PSA density > 0.15.

7041

7042 18. For men on the systematic biopsy arm which was negative or showed only  
7043 Gleason 6 cancer, biopsy if there is a 50% or more increase in PSA over 1 year or  
7044 a PSA density > 0.15. An MRI and targeted biopsy may be warranted in these  
7045 subjects.

7046

7047

7048 These are guidelines and should be interpreted with clinical judgment.

7049

7050 Follow-up will cease once treatment beyond active surveillance is undertaken  
7051 (prostatectomy, radiation therapy, focal therapy, etc.)

7052 PSA and biopsy results will be evaluated in subjects in whom the 2 year MRI  
7053 identifies a target.

## 7054 **10.12 Additional tests for biomarker discovery - Optional**

7055 Though not related to the primary outcome of this study, this cohort represents a  
7056 unique opportunity to obtain human samples for future biomarker discovery studies.  
7057 Participants will be consented to provide a blood, urine, semen, and tissue sample  
7058 after the consent and screen visit, and subsequent visits for storage and use in future  
7059 biomarker studies. In addition, men will be consented for use of the prostate biopsy  
7060 tissue in the biomarker discovery studies.

7061

7062 We propose two initial biomarker analyses for men recruited to the PRECISE study.  
7063 First we propose testing the utility of existing validated tests, these potentially  
7064 include the Genomic Prostate Score (OncotypeDx) [44] and a recently developed  
7065 multiple Kallikrein biomarker test[45]. We will test the hypothesis that alongside  
7066 conventional PSA measurements, the multiple Kallikrein test or other serum  
7067 biomarker test, may identify subjects whose MRI was initially negative for prostate  
7068 cancer, but who are at high risk of harboring clinically significant disease as detected  
7069 by the secondary MRI at 2 years. We will also test the association between serum  
7070 biomarkers and clinically significant or clinically insignificant prostate cancer  
7071 detected during the PRECISE study. We will also explore the potential for the  
7072 Genomic Prostate Score to provide additional information over and above Gleason  
7073 grade. These studies will be separately funded from PRECISE.

7074

7075 Sequential blood sampling during the 2 years of follow up (prior to a 2 year MRI) will  
7076 be planned to assess markers which might identify men at higher risk of developing  
7077 prostate cancer.

### 7078 **10.12.1 Samples to be collected for future biomarker discovery work** 7079 **(Optional)**

7080 Participants will be asked to consent to provide a blood, urine, semen, and tissue  
7081 sample after the consent and screen visit and subsequent visits for storage and use  
7082 in future biomarker studies. This will involve a separate consent form.

- 
- 7083 Samples include:
- 7084 • Blood –10mls serum, 15mls plasma, 10mls whole blood, 5mls buffy coat
  - 7085 • Urine – 75 mls urine
  - 7086 • Semen-1-5 cc (single ejaculate)
  - 7087 • Tissue-unstained biopsy sections -15 unstained slides from cancer, and
  - 7088 -15 unstained slide from non-cancer cores
  - 7089 (if possible)

### 7090 **10.13 Long-term data linkage – Permission to Contact**

7091 The cohort of men who consent to participate in this study represent a uniquely  
7092 characterized group. Their long-term outcomes will contribute to our understanding  
7093 of the epidemiology of prostate cancer beyond the questions being addressed in this  
7094 study.

7095  
7096 Permission to Contact (PTC) is a feasible mechanism to engage subjects in research  
7097 programs. This will allow researchers to contact study participants in the future to  
7098 assess their willingness to respond to questionnaires. This potentially enables  
7099 research that would complement the planned long-term follow up in terms of health  
7100 status, for obtaining information about future biopsies not included in the study, and  
7101 allow assessment of quality of life.

### 7102 **10.14 End of Study**

7103 The end of study assessment comprises an essential safety evaluation that should be  
7104 completed prior to discharging any subject from the study.

- 7105 • Adverse events;
- 7106 • PSA measurement;
- 7107 • EQ-5D-5L questionnaire;
- 7108 • An MRI in those who did NOT have a biopsy;
- 7109 • Complete CRF.

### 7110 **10.15 Risks and Benefits to Participants**

7111 An important consideration of this study is that men are being randomized to one of  
7112 two biopsy techniques when it is not known which will be more effective. Both  
7113 diagnostic tests are currently used in clinical practice at the institutions involved in  
7114 the trial. Though systematic TRUS guided biopsy could be considered standard of  
7115 care, there is enough evidence to support the concept that MRI-targeted biopsy may  
7116 be at least as effective as systematic TRUS guided biopsy[27].

#### 7117 **10.15.1 Risks to subjects**

7118 The intervention proposed in this trial (MRI-biopsy) do not offer participants any  
7119 more risk than if they underwent standard of care (systematic TRUS guided biopsy)  
7120 for the diagnosis of prostate cancer.

##### 7121 **10.15.1.1 Risk of Systematic TRUS guided biopsy**

7122 Systematic TRUS guided biopsy can be associated with discomfort, haematuria,  
7123 haematospermia and dysuria in a large proportion of subjects, which is self-resolving  
7124 (See Table 4). There is a 4% risk of systemic urosepsis[46].

7125 **10.15.1.2 Risks of MPMRI**

7126 MRI is associated with few risks. It is a safe procedure used in everyday clinical  
 7127 practice (See Table 4). Small risks of allergic reactions are associated with the  
 7128 intravenous administration of gadolinium, the contrast agent used in MRI scans. The  
 7129 study uses a low molecular weight Gd chelate as a contrast agent (Gadovist, Bayer,  
 7130 gadobutrol – generic). This contrast agent is used routinely for contrast enhanced  
 7131 MRI and is approved by Health Canada. Subjects will be screened for any  
 7132 contraindications to Gd injection or to MRI as per current clinical Dept of Medical  
 7133 Imaging protocols at each institution. The commonest reported sides effects are of  
 7134 limited duration and mild to moderate in intensity and include headache,  
 7135 vasodilation, injection site pain, nausea, dizziness, rash, and dyspnea. The incidence  
 7136 of these are <1%. Severe life threatening reactions such as severe anaphylaxis occur  
 7137 very rarely, about 1:10,000-1: 100,000. These are treatable with epinephrine and  
 7138 steroids. The risk of death is <1:100,000. There is a known risk of nephrogenic  
 7139 systemic fibrosis, a potentially fatal condition in subjects with impaired renal  
 7140 function, with an eGFR <30ml/min/1.73m<sup>2</sup>. These subjects are ineligible for this  
 7141 study.

7142 **10.15.1.3 Risks of MRI-targeted biopsy**

7143 MRI-targeted biopsy is associated with similar risks to the standard of care  
 7144 systematic TRUS guided biopsy. As fewer biopsy cores are being taken with MRI-  
 7145 targeted biopsy, the theoretical risk of adverse events associated may be less than  
 7146 that of systematic TRUS guided biopsy. In addition, as a proportion of men may not  
 7147 require a biopsy (approximately 30%) on a group level there will be reduced number  
 7148 of men experiencing these complications, which is one of the major advantages of an  
 7149 MRI-based approach.

7150

7151 **Table 4: Adverse events associated with procedures**

7152

| Side Effect \ Procedure | Systematic TRUS guided biopsy (Standard of care)   | MRI                                                                                     | MRI-targeted biopsy                                         |
|-------------------------|----------------------------------------------------|-----------------------------------------------------------------------------------------|-------------------------------------------------------------|
| Pain / discomfort       | Some have discomfort<br>Some have pain             | Intravenous cannulation (to allow contrast administration) can cause minimal discomfort | Similar / reduced compared to systematic TRUS guided biopsy |
| Dysuria                 | Majority have dysuria (self-resolving in 2-3 days) | No                                                                                      | Similar / reduced compared to systematic TRUS guided biopsy |
| Haematuria              | Majority (self-resolving, 2-3 days)                | No                                                                                      | Similar / reduced compared to systematic TRUS guided biopsy |
| Haemospermia            | Majority (self-resolving, 1-2 weeks)               | No                                                                                      | Similar / reduced compared to systematic TRUS guided biopsy |
| Erectile dysfunction    | 30% (self resolving after 1-2 months)              | No                                                                                      | Similar / reduced compared to systematic TRUS guided biopsy |

|                                |             |                                                                                                                                                                                               |                                                             |
|--------------------------------|-------------|-----------------------------------------------------------------------------------------------------------------------------------------------------------------------------------------------|-------------------------------------------------------------|
| Urinary Tract infection        | 1-8 %       | No                                                                                                                                                                                            | Similar / reduced compared to systematic TRUS guided biopsy |
| Systemic urosepsis             | 2-4%        | No                                                                                                                                                                                            | Similar / reduced compared to systematic TRUS guided biopsy |
| Urinary retention              | 1%          | No                                                                                                                                                                                            | Similar / reduced compared to systematic TRUS guided biopsy |
| Contrast allergy               | N/A         | Rare<br>< 1 in 10000 – severe allergic reaction (breathing problems)<br>< 1 in 2000 – moderate allergic reaction (nausea and vomiting)<br>< 1 in 250 – mild allergic reaction (rash, itching) | N/A                                                         |
| Adverse effects of antibiotics | Rare<br><1% | N/A                                                                                                                                                                                           | Rare<br><1%                                                 |

7153  
7154  
7155

### 7156 **10.15.2 Benefits to subjects**

7157 Subjects enrolled in this trial will benefit from the following:

- 7158 • Subjects in both arms may benefit from receiving a diagnostic test for suspected  
7159 prostate cancer and will receive further treatment if required. The research team  
7160 will also ensure streamlined diagnostic investigations to promptly conduct the  
7161 diagnostic test and communicate the test outcome for the subject.
- 7162 • Subjects enrolled in the trial will benefit from the dedicated research team  
7163 involved in their care in addition to the clinical team normally involved in their  
7164 care.
- 7165 • Subjects will benefit from additional discussions regarding the trial, which could  
7166 increase their understanding of prostate cancer and help them to make a more  
7167 informed decision about their health.
- 7168 • Subjects randomized to the MRI arm may benefit by avoiding a biopsy. This will  
7169 remove any risk of post-biopsy infection. MRI-randomized subjects may also  
7170 benefit from a reduced probability of having a clinically insignificant prostate  
7171 cancer diagnosed. Clinically insignificant prostate cancer is often treated  
7172 definitively per subject preference despite the lack of evidence supporting the  
7173 need. All definitive local therapies for prostate cancer carry the risk of peri-  
7174 operative complications as well as long-term risk of incontinence and erectile  
7175 dysfunction.

7176

---

7177 **10.16 Concomitant medications**

7178 **10.16.1 Permitted Medications**

7179 All concomitant medications taken during the study will be recorded in the CRF with  
7180 indication, dose information and dates of administration. The definition of which  
7181 medication would be considered outside the routine medical practice is up to the  
7182 discretion of the investigator. All dietary and herbal supplement usage will be  
7183 recorded in the CRF.

7184 **10.16.2 Non-Drug Therapies**

7185 Any occurrence of prostate-related surgical and/or non-surgical (or minimally  
7186 invasive) intervention during the conduct of the study will be recorded in the CRF.  
7187

7188 **11. Schedule of Study Visits**

7189 **11.1 Visit 1 (Screening/Randomization): Screening, Consent,**  
7190 **Randomization**

7191 **For all subjects enrolled in trial**

7192 Screening will occur any time following the referral of the subject. Ideally, this will be  
7193 performed as soon as possible following receipt of referral.

7194 Subjects will be consented only after they have had time to consider the study. This  
7195 may happen on the same visit as the screening visit.

7196 Randomization can happen immediately after the consent form is signed and  
7197 eligibility is confirmed.

7198

7199 Once enrolled into the study, subjects will be asked to fill out an EQ-5D-5L  
7200 questionnaire (Appendix 4), which is a validated 2-page questionnaire representing  
7201 health related quality of life. It takes approximately 2 minutes to complete. This  
7202 questionnaires should be completed at the screening visit before the subject leaves  
7203 the clinic.

7204

7205 If a subject agrees to the optional informed consent, from randomization until any  
7206 point prior to a biopsy, optional blood, urine, semen and tissue samples will be  
7207 collected for correlative studies.

7208

7209 Even if PSA testing was done prior to Visit 1, PSA should be obtained at Visit 1.

7210

7211 **11.2 Visit 2 (MRI): ARM A, for men randomized to MRI**

7212 This will occur approximately within one week of randomization. Men will receive an  
7213 MRI (see Section 10.2.)

7214 **11.3 Visit 3 (Biopsy): ARM A, MRI-Targeted Biopsy of Prostate**

7215 **For men randomized to ARM A, who have a lesion identified by MRI.** This  
7216 appointment will follow approximately one-two weeks of MRI.

7217



---

7218 Depending on local Urology service structure, an appointment for a biopsy may need  
7219 to be booked at the same time as the MRI is booked (i.e. immediately after  
7220 randomization) in order for a biopsy to occur in timely fashion. If the results of the  
7221 MRI show that a biopsy is not required, then the biopsy appointment can be used  
7222 instead of Visit 4 for follow up of results and treatment decision.

7223

7224 Men with a positive MRI (i.e. PI-RADS score of 3-5) will receive a MRI targeted biopsy  
7225 of the prostate (see Section 10.6). Men will complete an Immediate Post Biopsy  
7226 Questionnaire (Appendix 7) ideally completed and returned immediately after a  
7227 biopsy, before the subject leaves the department.

7228

7229 Subjects will be given a 30-day post-biopsy questionnaire to take home after biopsy  
7230 and complete as instructed on day 30 post-biopsy. This is to be returned by post or  
7231 at the 30 day follow up appointment (Visit 4). If Visit 4 is earlier than 30 days post  
7232 biopsy then this questionnaire can be given to the research team when 30 days is  
7233 finally complete. If Visit 4 is on or later than 30 days then this can be returned at the  
7234 Visit 4 appointment. As long as questionnaire is completed at 30-60 days post-  
7235 biopsy, it will be acceptable, however, the questionnaire should be completed as  
7236 close as possible to 30 days post-biopsy.

7237

7238 At 30-days post biopsy interval, a member of the research team will call the subject  
7239 to remind them to complete and return the 30-day questionnaires.

#### 7240 **11.4 Visit 3 (Biopsy): ARM B, for men randomized to a systematic** 7241 **TRUS-biopsy**

7242 **For men randomized to ARM B only.**

7243

7244 Men will receive a standardized TRUS-guided biopsy(see Section 10.7.) Men will  
7245 complete an Immediate Post Biopsy Questionnaire (Appendix 7) ideally completed  
7246 and returned immediately after the biopsy.

7247 Subjects will be given a 30-day post-biopsy questionnaire to take home after biopsy  
7248 and completed as instructed on day 30 post-biopsy. This is to be returned by post or  
7249 at the 30 day follow up appointment (Visit 4). If Visit 4 is earlier than 30 days post  
7250 biopsy then this questionnaire can be given to the research team when 30 days is  
7251 reached. If Visit 4 is on or later than 30 days then this can be returned at the Visit 4  
7252 appointment. As long as the questionnaire is completed at 30-60 days post-biopsy, it  
7253 will be acceptable, however the questionnaire should be completed as close as  
7254 possible to 30 days post-biopsy.

7255

7256 At 30-days post biopsy a member of the research team will call the subject to remind  
7257 them to complete and return the 30-day questionnaires.

#### 7258 **11.5 Visit 4 (Post-test follow up): ARM A, for men who did not receive a** 7259 **biopsy**

7260 This appointment will include a follow up meeting with the investigator to discuss  
7261 the results of the MRI as well as treatment decisions. This follow up should occur

---

7262 after the availability of the MRI report. At this visit the subject will also complete a  
7263 30-day post intervention EQ-5D-5L Questionnaire.

7264

7265 Subjects will complete a Post-MRI 30-day questionnaire (Appendix 8), which has been  
7266 posted to them by the research team. If Visit 4 is earlier than 30 days post MRI then  
7267 this questionnaire can be given to the research team when 30-days is finally  
7268 complete. If Visit 4 is on or later than 30 days then this can be returned at the Visit 4  
7269 appointment. As long as questionnaire is completed at 30-60 days post-MRI, it will  
7270 be acceptable, however the questionnaire should be completed as close as possible  
7271 to 30 days post-MRI.

7272

7273 At 30-days post MRI, a member of the research team will call the subject to remind  
7274 them to complete the 30-day questionnaires.

### 7275 **11.6 Visit 4 (Post-test follow up): For all men who received a biopsy**

7276 This appointment will include a follow up meeting with the investigator to discuss  
7277 the results of the biopsy as well as treatment decisions. This should be completed as  
7278 soon as possible following the availability of any pathology results. The follow up  
7279 appointment should be within 1 month of the biopsy. Depending on local Urology  
7280 service structure, these results may need to be discussed at an MDT meeting to  
7281 inform treatment decision.

7282

7283 The research team should record the treatment decision in the subject file.

7284

7285 Possibilities for treatment decision include but are not limited to:

- 7286 • Further diagnostic test (e.g. PSA, biopsy, MRI)
- 7287 • Active Surveillance
- 7288 • Radical treatment (e.g. radical prostatectomy, radical radiotherapy)
- 7289 • Focal therapy (e.g. high intensity focused ultrasound, cryotherapy)
- 7290 • Hormone therapy

7291

7292 At this visit the subject will also receive a 30-day post intervention EQ-5D-5L  
7293 Questionnaire to complete. Subjects will also complete a 30-day Post Biopsy  
7294 questionnaire (Appendix 8), which has been posted to them by the research team.  
7295 The questionnaire needs to be completed on the 30<sup>th</sup> day post-intervention (i.e. post  
7296 biopsy). However it will be accepted if completed up to 72 hours prior to or after the  
7297 30<sup>th</sup> day. A telephone reminder from the research team to the subject can take  
7298 place.

7299

### 7300 **11.7 Visit 5 (6 month follow up):26 week follow up**

7301 All subjects will have a 26 week visit

7302 Subjects will have the following:

- 7303 • Vitals, DRE
- 7304 • PSA
- 7305 • Optional sample collection (blood, urine)

---

7306 **11.8 Visit 6(1 year follow up): 52 week follow up**

7307 All subjects are planned to have a 52 week follow up visit.

7308 Subjects will be followed to obtain the following information on an annual basis:

- 7309 • Vitals, DRE
- 7310 • time to cancer diagnosis;
- 7311 • Gleason score progression;
- 7312 • time to intervention on active surveillance;
- 7313 • time on active surveillance;
- 7314 • results of PSA tests.
- 7315 • Time to follow up biopsy and/or mpMRI if performed (see follow up
- 7316 guidelines)
- 7317 • Indication for follow up biopsy
- 7318 • Was MRI performed prior to follow up biopsy
- 7319 • Was the biopsy systematic, targeted only or both systematic + targets, not
- 7320 done because of negative MRI
- 7321 • Optional sample collection (blood, urine)
- 7322

7323 Those subjects randomized to ARM A but who did not have an MRI-targeted biopsy  
7324 will have an additional MRI at Visit 6 (year 2).

7325 **11.9 Visit 7 (18 month follow up): 78 week follow up**

7326 All subjects will have a 78 week visit

7327 Subjects will have the following:

- 7328 • Vitals, DRE
- 7329 • PSA
- 7330 • Optional sample collection (blood, urine)

7331

7332 **11.10 Visit 8 (2 year follow up): End of study**

7333 All study participants will be followed for up to two years or until they undergo  
7334 radical treatment

7335 Subjects will be followed to obtain the following information on an annual basis:

- 7336 • Vitals, DRE
- 7337 • time to cancer diagnosis;
- 7338 • Gleason score progression;
- 7339 • time to intervention on active surveillance;
- 7340 • time on active surveillance;
- 7341 • results of PSA tests.
- 7342 • Optional sample collection (blood, urine)
- 7343
- 7344 • Time to follow up biopsy and/or mpMRI if performed (see follow up
- 7345 guidelines)
- 7346 ○ Indication for follow up biopsy
- 7347 ○ Was MRI performed prior to follow up biopsy

---

7348                   ○ Was the biopsy systematic, targets only or both systematic + targets,  
7349                   not done because of negative mpMRI

7350

7351

7352 Follow-up will cease once treatment beyond active surveillance is undertaken  
7353 (prostatectomy, radiation therapy, focal therapy, etc.).

7354

7355 Those subjects randomized to ARM A but who did not have an MRI-targeted biopsy  
7356 will have an additional MRI at Visit 8.

7357

## 7358 **12. Randomization**

### 7359 **12.1 Randomization Procedure**

7360 Written informed consent will be obtained from all eligible subjects prior to  
7361 commencing any study related procedures. The Ontario Clinical Oncology Group  
7362 (OCOG) Coordinating and Methods Centre (CMC) located at the Research Centre,  
7363 Juravinski Hospital and Cancer Centre, Hamilton, Ontario will centrally coordinate  
7364 subject randomization. Subjects will be allocated to the two treatment arms in an  
7365 approximate 1:1 ratio by use of a dynamic allocation scheme[47].

7366

7367 After documentation of written informed consent and confirmation of subject  
7368 eligibility, clinical centres will randomize the subject by accessing the CMC's web-  
7369 based Interactive Registration/Randomization System (IRIS). Prior to randomization  
7370 and treatment allocation, the subjects' individualized risk of high-grade prostate  
7371 cancer, obtained using the PCPTRC 2.0 calculator found at  
7372 <http://deb.uthscsa.edu/URORiskCalc/Pages/calcs.jsp> must be determined.

### 7373 **12.2 Stratification**

7374 Eligible, consenting subjects will be stratified by: (1) individualized risk of high-grade  
7375 prostate cancer (5% to 25%, >25%); and (2) clinical centre

### 7376 **12.3 Blinding and measures taken to avoid bias**

7377 This study is unblinded, and all subjects will be aware of the treatment that they are  
7378 receiving. As the MRI scan is unique to one of the arms it will not be possible to blind  
7379 the participants or investigators as to what intervention is being received. Therefore,  
7380 participants will be informed which arm they have been allocated to. Where  
7381 possible, the data will be coded so as to blind individuals analyzing the data from  
7382 which of the groups the data was from. Summary details of randomized allocation  
7383 and outcomes will not be made available (unless specifically authorized by the Trial  
7384 Steering Committee and/or Data Monitoring Committee) in order to maintain the  
7385 overall blind of the trial.

7386

7387 Radiologists will be blinded to subject information. (e.g. PSA level Radiologists will be  
7388 aware that the subject is part of the trial.

7389 Pathologists will be blinded to the cohort allocation. Concealment may be  
7390 challenging due to the different number of cores in the two groups, but this is  
7391 unavoidable. This is unlikely to represent a significant source of bias.

---

7392

7393

### 7394 **13. Data**

7395

7396 Type of data to be collected:

- 7397 • EQ-5D–5L questionnaires. These will measure quality of life and will be measured  
7398 at specific times throughout the trial.
- 7399 • Systematic TRUS guided biopsy– pathology – categorical (e.g. Gleason grade) and  
7400 continuous data
- 7401 • MRI – diagram representing MRI; categorical data for areas and scores of  
7402 suspicion (e.g. Sector 1p, score of suspicion 4/5)
- 7403 • MRI-targeted biopsy – pathology – categorical (e.g. Gleason grade) and  
7404 continuous data
- 7405 • Post-biopsy immediate and 30-day questionnaires – categorical data (e.g. fevers  
7406 yes/no)
- 7407 • Treatment decisions – categorical data (e.g. radical treatment)
- 7408 • PSA – continuous data (e.g. value of PSA in ng/ml)

7409

7410 Please see **Appendix1** for the time window for data collection.

7411

### 7412 **14. Statistical Considerations**

#### 7413 **14.1 Sample Size Calculation**

##### 7414 **STATISTICAL methods**

##### 7415 **Primary Analysis**

7416 Absolute differences in the proportion of clinically significant cancer detected  
7417 between arms will be calculated and compared using the Clopper-Pearson method.  
7418 If the lower boundary of an one-sided, 97.5% confidence interval for the difference  
7419 in detection rates of MPMRI-TB compared to systematic TRUS guided biopsy is less  
7420 than -5% then MPMRI-TB will be deemed non-inferior. In the event that the lower  
7421 bound is greater than zero, superiority can be claimed.

7422

7423 A supportive analysis will be performed by using a logistic regression model,  
7424 evaluating the odds ratio for detecting high grade cancers, adjusted for stratification  
7425 factors. MRI-guided biopsy would be considered non-inferior if the lower bound of  
7426 the two-sided, 95% confidence interval for the odds ratio exceeds 0.78. This lower  
7427 bound was calculated to approximate an absolute 5% difference of interest (NOTE:  
7428 the unadjusted odds ratio is 0.78 when treatment A is 30% and treatment B is 25%).

7429

##### 7430 **Secondary Analyses**

7431 For each secondary outcome, where appropriate, a difference in proportions with  
7432 95% CI, or a difference in means with 95% CI, as appropriate, will be presented.  
7433 Differences in the 1-year and 2-year rates along with 95% CI will be calculated for  
7434 time-to-event outcomes.

7435

---

7436  $\chi^2$  tests, t-tests or Wilcoxon rank sum tests, and log-rank tests will be used to test for  
7437 differences between allocation arms in secondary outcomes. Logistic regression and  
7438 Cox proportional hazards regression will be used to examine the effect of allocation  
7439 arm on outcomes, adjusted for stratification factors. All secondary outcomes will be  
7440 two-sided and statistical significance will be set at the  $\alpha=0.05$  level. No statistical  
7441 adjustments will be made due to multiple testing, however, results for secondary  
7442 outcomes will be interpreted cautiously, acknowledging that tests were performed  
7443 on secondary outcomes and numerous secondary tests were performed. Figures and  
7444 tables will be used to illustrate results of interest.

7445

#### 7446 **Treatment Allocation and Stratification**

7447 Subjects will be allocated to the two allocation arms in an approximate 1:1 ratio by  
7448 use of a dynamic allocation scheme. Specifically, the first 20 subjects will be  
7449 randomly allocated to arm in an approximate 1:1 ratio. After the first 20 subjects, a  
7450 biased coin method will be used, whereby the number of subjects within each  
7451 stratum will be calculated, and the next eligible subject will be allocated (with  
7452 probability  $p=0.8$ ) to the arm which reduces the imbalance. If no imbalance exists,  
7453 allocation to each arm will occur with probability  $p=0.5$ .

7454

#### 7455 Stratification

7456 For treatment allocation, the subjects' individualized risk of high-grade prostate  
7457 cancer will be determined. Risk will be assessed using the PCPTRC 2.0 calculator,  
7458 found at <http://deb.uthscsa.edu/URORiskCalc/Pages/calcs.jsp>. Eligible, consenting  
7459 subjects will be stratified by:

7460 (1) individualized risk of high-grade prostate cancer (5% to 25%, >25%);

7461 (2) clinical centre.

7462

#### 7463 **Sample Size**

7464 Rates of clinically significant cancer (Gleason  $\geq 7$ ) detection from targeted-alone  
7465 biopsy in a population with no prior biopsy have been shown to be 42% [37] and  
7466 50% from another study [36].

7467

7468 Rates of clinically significant cancer detection from one the largest studies of  
7469 systematic TRUS guided biopsy in men without prior biopsy are shown to be 27%  
7470 [49]. Therefore, based on these results, it may be assumed that targeted-biopsy will  
7471 detect clinically significant cancer in >15% more men (i.e. 42% versus 27%) than  
7472 systematic TRUS guided biopsy.

7473

7474 For this study, it will be conservatively hypothesized that systematic TRUS guided  
7475 biopsy will detect clinically significant cancer in 30% of men, and targeted biopsy will  
7476 detect clinically significant cancer in 10% more men (i.e. 40% total) than systematic  
7477 TRUS guided biopsy. For the non-inferiority hypothesis, using 90% power and 2.5%  
7478 one sided-alpha, assuming a targeted biopsy detection rate of clinically significant  
7479 cancer of 40%, and a detection rate for systematic TRUS guided biopsy of 30% and  
7480 using a margin of clinical unimportance of 5%, 211 men per arm will be required. The  
7481 choice of 5% as the margin of non-inferiority represents a difference that would be  
7482 considered clinically important.

7483

---

7484 Thus total men required in study = **422**.

7485

7486 To account potential withdrawal / loss to follow up and the effect of stratification,  
7487 the sample size will be inflated by 5%, and a target of **450 men** will be recruited.

7488

7489 Note that the rate of clinically significant cancers is very dependent on the  
7490 population registered for this study. It is possible that fewer (or more) subjects will  
7491 have clinically significant cancers than what is initially hypothesized. However, if the  
7492 population rate of clinically significant cancers is less (i.e. the systematic TRUS guided  
7493 biopsy detection rate is <30%) and other statistical assumptions remain as stated  
7494 previously, the statistical power will increase. The minimum statistical power would  
7495 be obtained if the clinically significant cancer detection rate was 45% for systematic  
7496 TRUS guided biopsy and 55% for targeted biopsy, which would still achieve >84%  
7497 power. Therefore, the sample size is sufficient to ensure non-inferiority, even if the  
7498 rate of clinically significant cancer in the population is miss-specified, assuming an  
7499 absolute difference of 10% between targeted and systematic TRUS guided  
7500 biopsydetection rates, and a 5% margin of non-inferiority.

7501

### 7502 **Statistical Conventions**

7503 For categorical data, tables will be presented showing the n and percentage  
7504 (n/N\*100%) of subjects. Analyses will be presented by study allocation arm  
7505 separately.

7506

7507 Duration of time will be described in either years, months or weeks, and calculated  
7508 using: (last date – first date + 1) / X, where X=365.25 for years, X=30.4 for months, or  
7509 X=7 for weeks. Example: Age (in years) will be calculated as: (randomization date –  
7510 date of birth + 1)/365.25.

7511

7512 Transformations of the data in order to meet statistical assumptions may be  
7513 considered. Type-1 error will be set to 5%. Standard diagnostic tools will be used to  
7514 assess any of the model fittings. All the statistical analysis will be carried out using  
7515 SAS version-9 and over for Windows (Cary, NC) or R version 3.2.2. (www.r-  
7516 project.org) or higher.

7517

### 7518 **Missing Data**

7519 Missing values for the primary endpoint will be examined closely. Sources and  
7520 reasons for the absence of data incurred as a result of subjects lost-to-follow up,  
7521 dropouts, and intermittent missing values will be described and explored by various  
7522 summary statistics as well as graphical displays between the two allocation arms.  
7523 Subjects' lost-to-follow up or dropouts will be explored and the characteristics of  
7524 those subjects will be described by allocation arm and tested using Fisher's exact  
7525 tests or Wilcoxon rank sum tests.

7526

7527 Missing data for secondary endpoints will be described. The methods for evaluating  
7528 missing data of the primary endpoint may be employed for endpoints of interest. For  
7529 summarization of baseline data, the following conventions will be used for partial  
7530 missing date information occurring prior to randomization (e.g. for medical history  
7531 or prior treatment). If year is missing, the date will be set at missing. If year is

---

7532 available, but month and date is missing, the month and date will be set to July 1<sup>st</sup> of  
7533 the respective year. If date is missing, but year and month available, the day will be  
7534 set to the 15<sup>th</sup> of the respective month.

## 7535 **14.2 Interim Analyses**

7536  
7537 The Trial Steering Committee (TSC), Data Safety and Monitoring Committee (DSMC)  
7538 or Trial PI may recommend cessation of the trial or suggestion modifications to trial  
7539 conduct if there are concerns about subject safety or futility. Unless otherwise  
7540 specified by one of these bodies, a futility analysis will be performed after  
7541 approximately 200 subjects are enrolled and have their primary outcome  
7542 ascertained. Simulation will be used to estimate the conditional probability of futility  
7543 assuming the study was to continue to completion, and assuming the clinically  
7544 significant cancer detection rate is 30% in both arms. If the conditional probability is  
7545 0.95 or higher that continuation of the study will result in a negative result, the  
7546 DSMC will recommend a suspension of recruitment to the trial, and initiation of a  
7547 quality assurance review. A decision to permanently close the study or continue with  
7548 accrual will be determined by the Steering Committee, based on the results of the  
7549 quality assurance review, and the recommendation of the DSMC.

7550

### 7551 **Timing of Final Analysis**

7552 A single, final, analysis will occur after all subjects have undergone their initial biopsy  
7553 and all data related to the initial biopsy is documented and validated. Follow-up  
7554 analyses will be conducted after all subjects have completed two years of follow-up.

## 7555 **14.3 Populations:**

7556 The per protocol, study population will consist of all subjects who satisfy all eligibility  
7557 criteria and are randomized to the study, who undergo MPMRI-TB or systematic  
7558 TRUS guided biopsy and have their primary outcome measured. This population will  
7559 be used for the primary analysis of non-inferiority.

7560 The intent-to-treat (ITT) population will consist of all subjects randomized to the  
7561 study, regardless of any protocol violations or if they do not complete the study as  
7562 defined in the protocol. The ITT population will be used as a supportive analysis of  
7563 the primary analysis, for all safety analyses, and for any analysis investigating  
7564 superiority.

## 7565 **14.4 Primary Outcome**

### 7566 **14.4.1 Detection rate of clinically significant cancer**

7567 The proportion of men in each arm with clinically significant cancer (Gleason  $\geq 7$ ) will  
7568 be calculated based on histology results from biopsy procedures. Analysis will be on  
7569 the intention to treat population.

7570

7571 Absolute differences in proportion of clinically significant cancer detected between  
7572 arms will be calculated and compared. If the lower boundary of the 97.5%  
7573 confidence interval for the difference in detection rates of MPMRI-TB compared to  
7574 systematic TRUS guided biopsy is less than -5% then MPMRI-TB will be deemed non-



---

7575 inferior. In the event that the lower bound is greater than zero, superiority can be  
7576 claimed.

7577

7578 The primary analysis will be conducted once all subjects have completed visit 4,  
7579 when the results of the biopsy or MRI are given to the subject.

7580

## 7581 **14.5 Secondary Outcomes**

7582 For each secondary outcome, where appropriate, a difference in proportions with  
7583 95% CI, or a difference in means with 95% CI, as appropriate, will be presented.

7584

### 7585 **14.5.1 Proportion of men in each arm with clinically insignificant 7586 cancer detected**

7587 The proportion of men in each arm with clinically insignificant cancer (Gleason <7)  
7588 will be calculated based on histology results from biopsy procedures. In addition, the  
7589 numbers with clinically insignificant cancer identified by MRI alone will also be  
7590 included.

7591

### 7592 **14.5.2 Proportion of men in each arm with Gleason $\geq 4+3$ detected**

7593 The proportion of men in each arm with Gleason  $\geq 4+3$  will be calculated based on  
7594 histology results from biopsy procedures. In addition, the numbers with clinically  
7595 insignificant cancer identified by MRI alone will also be included.

7596

### 7597 **14.5.3 Proportion of men in MPMRI arm who avoid biopsy.**

7598

### 7599 **14.5.4 Proportion of men in the MRI arm whom the PI-RADS score for 7600 suspicion of clinically significant cancer was 3, 4 or 5 but no clinically 7601 significant cancer was detected.**

7602 The proportion of men in each arm whom the PI-RADS score for suspicion of  
7603 clinically significant cancer was 3, 4 or 5 but no clinically significant cancer was  
7604 detected, will be calculated based on histology results from biopsy procedures.

7605

### 7606 **14.5.5 Proportion of men in each arm who go on to definitive local 7607 treatment (e.g. radical prostatectomy, radiotherapy, brachytherapy) or 7608 systemic treatment (e.g. hormone therapy, chemotherapy)**

7609

7610

7611

### 7612 **14.5.8 Proportion of men with a negative MRI who progress within 24 7613 months after their study MRI, or who are upgraded within 24 months**

7614 Men with a negative MRI who do not undergo a biopsy will have a follow-up MRI 2  
7615 years after their study MRI. We will determine the proportion of men whose  
7616 subsequent MRI shows a PI-RADS 3 or greater lesion. The results of targeted biopsy  
7617 of those lesions will be recorded and analyzed. The number of men who are  
7618 upgraded to Gleason  $\geq 7$  due to an off-protocol biopsy will also be recorded.

---

7619

#### 7620 **14.5.9 Proportion of men with post-biopsy adverse events**

7621 Immediate post-biopsy discomfort and pain will be characterized by intensity using  
7622 the numerical analogue score. Scores for each arm will be compared. 30-day biopsy  
7623 specific complications and adverse events will be characterized according to their  
7624 presence, absence, duration and how much of a problem the symptoms caused the  
7625 subject. Whether the subject had contact with health care providers/system will also  
7626 be recorded. The proportion of individuals experiencing each symptom, proportion  
7627 in whom that symptom caused a problem and proportion who had contact with  
7628 healthcare providers/system will be calculated and compared qualitatively between  
7629 arms utilizing classification systems validated in previous studies [39]. The biopsy  
7630 specific complications that will be compared include pain, urinary retention, fever,  
7631 pain, erectile dysfunction, urinary incontinence, haematuria, haematochezia and  
7632 haemotospermia.

7633

7634 Any post-biopsy complications up to 30-days post biopsy procedure will be tabulated  
7635 and listed by duration and management.

7636

#### 7637 **14.5.10 Health related quality of life**

7638 EQ-5D-5L descriptive domain summary indices and visual analogue scores will be  
7639 assessed at baseline, at 2 years and changes will be compared between arms.

7640

7641 EQ-5D was selected as a simple, low burden quality of life instrument that will  
7642 provide validated information on symptoms, particularly anxiety, that could be  
7643 compared across disease states and studies. Other subject-reported outcomes  
7644 directly linked to the interventions will be captured in the post-biopsy surveys. Since  
7645 it provides utilities, these will be incorporated into a secondary economic analysis if  
7646 the results permit.

7647

#### 7648 **14.5.11 Proportion Gleason score upgrading in men undergoing radical 7649 prostatectomy**

7650 Of the men who undergo radical prostatectomy, the proportion who have cancer  
7651 upgraded from the biopsy histopathology to the radical prostatectomy  
7652 histopathology in each arm will be calculated and compared.

7653

#### 7654 **14.5.12 Cost Outcomes**

7655 As the study design for clinical outcomes is one of non-inferiority, the primary  
7656 economic analysis will be **cost minimization analysis**. The perspective of the  
7657 economic analysis will be that of the public payer. The primary goal of the analysis  
7658 will be to support arguments for public funding. Thus the costs of participant  
7659 burden, logistical challenges, and expense of obtaining societal costs, will not be  
7660 evaluated.

7661

##### 7662 **14.5.12.1 Data collection:**

7663 As part of the informed consent process, participants in Ontario will also  
7664 consent to having their Ontario Health Insurance Number recorded, to be  
7665 later transferred to the Institute for Clinical Evaluative Sciences (ICES) where

---

7666 it will be linked to a number of administrative claims databases recording  
7667 health system resource utilization such as physician billing [Ontario Health  
7668 Insurance Plan (OHIP)]; laboratory and diagnostic tests (OHIP); hospitalization  
7669 and surgery [Discharge Abstract Database (DAD)]; medications [Ontario Drug  
7670 Benefit (ODB) Formulary, New Drug Funding Program (NDFP), and Activity  
7671 Level Reporting (ALR)]; clinic and emergency department visits [National  
7672 Ambulatory Care Reporting System (NACRS), Emergency Department visits];  
7673 radiation (ALR); homecare (Home Care databases) and a few additional ones  
7674 as determined necessary (e.g., Long-term care, Mental Health, Diabetes. The  
7675 overall, number and proportion of health system resources will be  
7676 determined. In this way we can capture comprehensive resource utilization  
7677 related to on-trial management including any adverse events.

#### 7678 **14.5.12.2 Health Insurance number handling and security**

7679 As the economic implications of this study are of prime importance to some  
7680 of the funders, the request for data linkage will be part of the main consent  
7681 form. If a participant indicates to the study team that they decline or  
7682 withdraw consent, the OHIP number will be recorded as 9999-999-999-XX.  
7683 The OHIP numbers will stay with the participating institution until after  
7684 accrual is complete, and then they will all be transferred at one time under  
7685 data sharing agreements between ICES and each institution. Data will be  
7686 transferred using a secure electronic file transfer system established by ICES  
7687 and managed by authorized ICES personnel responsible for receiving  
7688 data. The file transfer system uses security safeguards including encryption  
7689 and authentication.

7690  
7691 ICES is a Prescribed Entity under the Personal Health Information Protection  
7692 Act (PHIPA), and can receive and use personal health information for  
7693 purposes of analysis and compiling statistical information and other research.  
7694 Its policies and procedures for privacy protection and data security have been  
7695 approved by Ontario's Privacy Commissioner. ICES is a secure facility, video-  
7696 monitored and requiring passkeys to access private offices and  
7697 computers. ICES has extensive experience in the protection of confidentiality  
7698 when using such data. It has a UNIX-based network that cannot be accessed  
7699 externally. ICES data facilities are fully 'moated' (no connections to other  
7700 computers). At ICES, routine procedures for data backup are instituted by a  
7701 data management team. The data is burned onto a CD or placed on an  
7702 external hard drive and placed in a locked vault. All ICES staff and scientific  
7703 affiliates are required to sign agreements of confidentiality annually. Internal  
7704 audits are conducted to monitor compliance with ICES policies, standards and  
7705 procedures.

7706  
7707 Study data with direct personal identifiers such as OHIP numbers will  
7708 reside on a dedicated and secure server at ICES and will only be  
7709 accessible by a named Data Covenantor. The Covenantor will encode  
7710 the OHIP number, replacing it with an ICES key number (IKN) (a code)  
7711 and transferring it to a "moated" server for the study project. (The  
7712 Data Covenantor is an ICES person named in our data sharing

---

7713 agreements and identified to the Office of the Information and  
7714 Privacy Commissioner, who can access personal health information at  
7715 ICES for the purposes of receiving, coding, transferring or destroying  
7716 personal health information.) The coded study data will only be made  
7717 available to the Principal Investigator and project staff directly  
7718 responsible for data analysis (under the supervision of the  
7719 investigator). No subject, physician or institution will be identified in  
7720 the reporting of results  
7721

### 7722 **14.5.12.3 Cost calculation**

7723 Once the utilization of health services is determined from those cases linked  
7724 to administrative databases, publicly available costs (2016\$CAN) will be  
7725 applied to health services. Costs for physician and laboratory services will be  
7726 determined by applying that year's fee code. Costs for hospital care will be  
7727 estimated using the Canadian Institute for Health Information (CIHI) Resource  
7728 Intensity Weight method for the most recently available year. Outpatient  
7729 prescription drug costs for participants not covered by ODB (those under age  
7730 65 and not on social assistance) will be considered to be the same as the trial  
7731 arm-specific average for those with coverage. Costs will then be inflated  
7732 using the healthcare-specific Consumer Price Index reported by Statistics  
7733 Canada into constant Canadian dollars for the year the study ends. Due to the  
7734 short time horizon, discounting will not be applied.

### 7735 **14.5.12.4 Primary Analysis**

7736 A within-trial analysis will be conducted to calculate the total cost for each  
7737 arm and mean cost per subject for each arm. Frequency distributions and  
7738 measures of central tendency (e.g. means and medians) will be determined  
7739 for each resource category (e.g. hospitalizations) for each arm of the study.  
7740 Confidence intervals for the difference in costs and resource utilization  
7741 between the strategies overall and for each resource category will also be  
7742 calculated. Univariate comparisons between the groups will be made  
7743 primarily using nonparametric tests, such as Wilcoxon rank-sum test. In the  
7744 primary analysis, assuming equivalence in the primary outcome, an arm with  
7745 significantly lower mean costs will be considered the economically most  
7746 attractive approach.

7747  
7748 Should the clinical trial find a difference between the two arms on the  
7749 primary endpoint, an incremental cost-benefit analysis will be calculated by  
7750 deriving the additional cost per case of clinically significant cancer diagnosed,  
7751 according to the following equation:

7752

$$\text{Cost-benefit} = \frac{\text{Cost}_{(\text{Arm A})} - \text{Cost}_{(\text{Arm B})}}{\text{Diagnoses}_{(\text{Arm A})} - \text{Diagnoses}_{(\text{Arm B})}}$$

7753 The cost of avoiding each additional case of clinically insignificant cancer  
7754 diagnosed may also be similarly calculated. Consideration will be given to

---

7755 extending this analysis using economic modeling with incorporation of utility  
7756 values from the EQ-5D to allow a lifetime perspective to be taken and the  
7757 estimation of quality adjusted life years (QALYs).

#### 7758 **14.5.12.5 Secondary Cost Analyses**

7759 One and multi-way sensitivity analyses will be carried out around major cost  
7760 drivers by varying the costs over their observed ranges and conducting  
7761 threshold analyses where appropriate. Sensitivity analyses will also be  
7762 performed to evaluate potential limitations in the data, such as ODB costs as  
7763 described above (though the proportion without ODB coverage should be  
7764 similar in the two arms, and it is not expected to be a major cost-driver).

7765

7766

7767

#### 7768 **14.5.13 Missing Data**

7769 The impact of missing data will be explored in all analyses; sensitivity  
7770 analyses/multiple imputation will be performed as appropriate.

7771

### 7772 **15. Participant compliance and withdrawal**

7773

7774 The study will be completed when at least 422 subjects have been randomized, have  
7775 undergone a diagnostic test and completed follow up. Compliance to randomized  
7776 treatment will be assessed by monitoring the completed forms, e.g. the systematic  
7777 TRUS guided biopsy form or the MRI-targeted biopsy form.

7778

7779 In consenting to the study, subjects are consenting to study monitoring, imaging and  
7780 biopsy procedures, follow-up, data collection and analysis. Subjects are allowed to  
7781 withdraw consent at any stage and their care will not be affected in any way. All  
7782 communication surrounding the withdrawal and its reasons should be noted in the  
7783 subject's record. Such cases should be reported to the PRECISE Study Operations  
7784 Office. Data up to the time of withdrawal can be included in the study.

7785

7786 As the study diagnostic tests are for suspected cancer it is not anticipated that there  
7787 will be significant loss to follow up.

7788

#### 7789 **15.1 Subject Withdrawal from Study**

7790 A subject may discontinue participation in this study at any time at the investigator's  
7791 discretion or at the request of the subject.

7792

7793 If a subject discontinues at or before Visit 1 (randomization), he is not required to  
7794 complete end of study assessments.

7795

7796 If a subject discontinues after Visit 1 (randomization) for any reason, the investigator  
7797 should make every effort to complete the activities bulleted below.

7798

- 7799
- End of study assessments as outlined in **Section 10.17.**

- 
- 7800 • Any occurrence of death, prostatic surgical intervention, non-surgical treatment  
7801 for prostate cancer after study withdrawal should be documented in the CRF and  
7802 source documents.

7803

7804 Subjects who are discontinued from the study after randomization will not be  
7805 replaced. Subjects withdrawn from the study retain their subject number if already  
7806 given. New subjects will be allocated a new subject number.

7807

7808 In the event that a subject is prematurely discontinued from the study at any time  
7809 due to an AE, the procedures describe in **Section 16.3** must be followed.

7810

7811 Subjects should be withdrawn from the study for any of the following criteria:

7812

- Non-compliance with the requirements of the study.

7813

- Request to discontinue treatment. This request can be made by either the  
7814 subject or the investigator.

7815

- Develops progressive disease.

7816

## 7817 **15.2 Study completion**

7818 The primary end point will be reached when the last subject entered has their  
7819 systematic biopsy or MRI and targeted biopsy if indicated. All subjects will be  
7820 followed for up to 2 years following study entry or until they have radical treatment.  
7821 Subjects who are found to have significant prostate cancer and are treated will not  
7822 be included in follow up for this period. This includes subjects diagnosed as part of  
7823 study protocol, and subjects diagnosed during the follow up period by standard-of-  
7824 care procedures. However, post MRI/biopsy questionnaires will not be required  
7825 following non-protocol based procedures.

7826

## 7827 **16. Data Monitoring, Quality Control and Safety**

### 7828 **16.1 Stopping / discontinuation rules**

7829 The study will be completed when 450 participants have been randomized,  
7830 undergone a diagnostic test and completed follow up.

7831

7832 The Trial Steering Committee (TSC), Data Safety and Monitoring Committee (DSMC)  
7833 or Trial PI may recommend cessation of the trial or suggestion modifications to trial  
7834 conduct if there are concerns about subject safety or futility. See Section 14.2.1 for  
7835 further details on the interim analysis. Appropriate documentation as per the PI's  
7836 requirement will be completed if stopping the trial is necessary and the ethics  
7837 committee will be informed.

7838

7839 As the study is unblinded there will be no need for randomization code breaks.

7840

### 7841 **16.2 Monitoring, quality control and assurance**

7842

7843 Members of the trial team will be Good Clinical Practice (or equivalent) trained.

---

7844

7845 An independent DSMC will be appointed to monitor subject safety and the rate of  
7846 recruitment of subjects in the study. They will meet at least once a year whilst the  
7847 trial is ongoing for routine review of safety data and trial progression. They have the  
7848 power to call additional meetings and review data at any point in the trial should  
7849 they wish to do so.

7850

7851 The PI may also arrange an independent trial monitor to review the study data.

## 7852 **16.3 Assessment of safety**

7853 The investigator is responsible for the detection and documentation of events  
7854 meeting the criteria and definition of an AE or SAE as provided in this protocol.  
7855 During this study, when there is a safety evaluation, the investigator or site staff will  
7856 be responsible for detecting AEs and SAEs, as detailed in this section of the protocol.

### 7857 **16.3.1 Definition of an Adverse Event (AE)**

7858 Adverse events (AE) will be defined as “any untoward medical occurrence in a  
7859 clinical trial subject undergoing any intervention in the trial, which does not  
7860 necessarily have a causal relationship with this treatment”.

7861

7862 Only adverse events specific to biopsy-related complications including pain, fever,  
7863 hematuria, hematochezia, hematospermia, urinary retention and urinary  
7864 incontinence will be recorded. Any other adverse events will not be recorded. Please  
7865 refer to section 16.3.6 of the protocol.

### 7866 **16.3.2 Definition of a Serious Adverse Event (SAE)**

7867 Serious adverse events (SAE) will be defined as “any untoward medical occurrence as  
7868 a result of any intervention in the trial that:

7869 **(a) results in death**

7870 **(b) is life-threatening**

7871 The term ‘life-threatening’ in the definition of ‘serious’ refers to an event in which  
7872 the subject was at risk of death at the time of the event. It does not refer to an  
7873 event, which hypothetically might have caused death, if it were more severe.

7874 **(c) requires hospitalisation or prolongation of existing hospitalisation**

7875 In general, hospitalization signifies that the subject has been detained (usually  
7876 involving at least an overnight stay) at a hospital or emergency ward for observation  
7877 and/or treatment that would not have been appropriate in the physicians’ office or  
7878 outpatient setting. Complications that occur during hospitalization are AEs. If a  
7879 complication prolongs hospitalization or fulfils any other serious criteria, the event is  
7880 serious. When in doubt as to whether ‘hospitalization’; occurred or was necessary,  
7881 the AE should be considered serious. Hospitalization for elective treatment of a pre-  
7882 existing condition that did not worsen from baseline is not considered an AE.

7883 **(d) results in disability / incapacity**

7884 The term disability means substantial disruption of a person’s ability to conduct  
7885 normal life functions. This definition is not intended to include experiences of  
7886 relatively minor medical significance such as uncomplicated headache, nausea,  
7887 vomiting, diarrhea, influenza and accidental trauma (e.g. sprained ankle) which may

---

7888 interfere or prevent everyday life functions but do not constitute a substantial  
7889 disruption.  
7890 **(e) is a congenital abnormality/birth defect.**  
7891 Medical or scientific judgement should be exercised in deciding whether reporting is  
7892 appropriate in other situations, such as important medical events that may not be  
7893 immediately life threatening or result in death or hospitalization but may jeopardise  
7894 the subject or may require medical or surgical intervention to prevent one of the  
7895 outcomes listed in the above definition. These should also be considered serious.  
7896 Examples of such events are invasive or malignant cancers, intensive treatment in an  
7897 emergency room or at home for allergic bronchospasm, blood dyscrasias or  
7898 convulsions that do not result in hospitalization, or development of drug  
7899 dependence or drug abuse.

### 7900 **16.3.3 Disease-Related Events or Outcomes Not Qualifying as SAEs**

7901 An event which is part of the natural course of the disease under study (i.e., disease  
7902 progression) does not need to be reported as a serious adverse event. Progression of  
7903 the subject's neoplasia will be recorded in the clinical assessments in the CRF. Death  
7904 due to progressive disease is to be recorded on 'Record of Death' CRF page and not  
7905 as an SAE. However, if the progression of the underlying disease is greater than that  
7906 which would normally be expected for the subject, or if the investigator considers  
7907 that there was a causal relationship between treatment with study medication or  
7908 protocol design/procedures and the disease progression, then this must be reported  
7909 as an SAE. Any new primary cancer must be reported as an SAE.

### 7910 **16.3.4 Lack of Efficacy**

7911 "Lack of efficacy" will not be reported as an AE. The signs and symptoms or clinical  
7912 sequelae resulting from lack of efficacy will be reported if they fulfill the AE or SAE  
7913 definition (including clarifications).

### 7914 **16.3.5 Clinical Laboratory Abnormalities and Other Abnormal 7915 Assessments as AEs and SAEs**

7916 Abnormal laboratory findings or other abnormal assessments that are judged by the  
7917 investigator as **clinically significant** (CS) will be recorded as AEs or SAEs if they meet  
7918 the definition of an AE or SAE. Clinically significant abnormal laboratory findings or  
7919 other abnormal assessments that are detected during the study or are present at  
7920 baseline and significantly worsen following the start of the study will be reported as  
7921 AEs or SAEs. However, clinically significant abnormal findings or other abnormal  
7922 assessments that are associated with the disease being studied, unless judged by the  
7923 investigator as more severe than expected for the subject's condition or that are  
7924 present or detected at the start of the study and do not worsen, will not be reported  
7925 as AEs or SAEs.

7926  
7927 The trial interventions are routinely carried out in clinical practice for investigation of  
7928 suspected cancer and the risks of the interventions are therefore not any greater  
7929 than if a man was not part of the trial. The risks of the procedures are relatively low,  
7930 as detailed in Section 11.  
7931



---

7932 The investigator will exercise his or her medical and scientific judgment in deciding  
7933 whether an abnormal laboratory finding or other abnormal assessment is clinically  
7934 significant.

### 7935 **16.3.6 Recording/Reporting AEs and SAEs**

7936 The first AE reporting period for this study begins at randomization and  
7937 will be recorded until 30-days post-biopsy. In the event that the subject does not  
7938 undergo biopsy, AEs and SAEs should be recorded until 30-days post MRI.

7939  
7940 Only adverse events specific to biopsy-related complications including pain, fever,  
7941 hematuria, hematochezia, hematospermia, urinary retention and urinary  
7942 incontinence will be recorded. Any other adverse events will not be recorded.

7943  
7944 AEs will be recorded by a member of the research team or clinical team on an AE  
7945 report form. All SAEs must be recorded on a SAE report form. Completed AEs and  
7946 SAE report forms should be sent to the CTG who will keep a log of AEs and SAEs. AE  
7947 and SAE logs will be reviewed by the DSMC.

7948  
7949 For the purposes of this study, only those AEs deemed POSSIBLY, PROBABLY, or  
7950 DEFINITELY related to the study procedures (ie, MRI or biopsy), or meets the criteria  
7951 as a SAE, will be collected and reported.

7952  
7953 Expected AEs includes the following:

- 7954 • Pain
- 7955 • Blood in the urine
- 7956 • Blood in the semen
- 7957 • Blood in the stool or back passage
- 7958 • Erectile dysfunction
- 7959 • Urinary incontinence
- 7960 • Urinary tract infection
- 7961 • Fevers

7962  
7963 In addition, small risks of allergic reactions are associated with the intravenous  
7964 administration of gadolinium, the contrast agent used in MRI scans, as described in  
7965 section 10.18.1.2. This contrast agent is used consistently in MRI scanning and is not  
7966 limited to this trial.

7967  
7968 If any of these symptoms are accompanied by events consistent with the definition  
7969 of an SAE as specified above, then the event will be considered an SAE.

7970  
7971 The Trial Coordinator, Principle Investigator or Chief Investigator should be informed  
7972 of any SAE within 24 hours.

7973 All SAE report forms must be completed and the SAE logs updated. All SAEs must be  
7974 followed up until a resolution is reached (i.e. recovered, recovering, recovered with  
7975 sequelae, fatal, not recovered or unknown).

7976

---

7977 Local sites may have specific institutional protocols for reporting SAEs, which should  
7978 be followed in addition.

7979

7980 When an AE/SAE occurs, it is the responsibility of the investigator to review all  
7981 documentation relative to the event. The investigator will then record all relevant  
7982 information regarding an AE/SAE on the CRF.

7983

7984 The investigator will attempt to establish a diagnosis of the event based on signs,  
7985 symptoms and/or other clinical information. In such cases, the diagnosis should be  
7986 documented as the AE/SAE and not the individual signs/symptoms.

### 7987 **16.3.7 Evaluating AEs and SAEs**

#### 7988 **16.3.7.1 Assessment of Intensity**

7989

7990 The investigator will make an assessment of intensity for each AE and SAE reported  
7991 during the study. Degree of severity and change in severity will be recorded by  
7992 means of National Cancer Institute, Common Terminology Criteria for Adverse  
7993 Events (NCI CTCAE), version 4.03.

7994

7995 If the event is not listed in the NCI CTCAE (v.4.03), the assessment will be based on  
7996 the investigator's clinical judgment. The intensity of each AE and SAE recorded in the  
7997 CRF should be assigned to one of the following categories:

7998

7999 **Mild:** An event that is easily tolerated by the subject, causing minimal discomfort  
8000 and not interfering with everyday activities.

8001 **Moderate:** An event that is sufficiently discomforting to interfere with normal  
8002 everyday activities.

8003 **Severe:** An event that prevents normal everyday activities.

8004

8005 An event that is classified as severe should not be confused with a SAE. Severity is a  
8006 category utilized for rating the intensity of an event; both AEs and SAEs can be  
8007 assessed as severe.

#### 8008 **16.3.7.2 Assessment of Causality**

8009 The investigator is obligated to assess the relationship between investigational  
8010 product and the occurrence of each AE/SAE. The investigator will use clinical  
8011 judgment to determine the relationship. Alternative causes and the temporal  
8012 relationship of the event to the investigational product will be considered and  
8013 investigated. The investigator will also consult the CIB and or Product Information,  
8014 for marketed products, in the determination of his/her assessment.

### 8015 **16.3.8 Follow-up of AEs and SAEs**

8016 After the initial AE/SAE report, the investigator is required to proactively follow each  
8017 subject and provide further information to the PI of the study, on the subject's  
8018 condition.

8019

---

8020 All AEs and SAEs documented at a previous visit/contact and are ongoing, will be  
8021 reviewed at subsequent visits/contacts.

8022

8023 All AEs and SAEs will be followed until resolution, until the condition stabilizes, until  
8024 the event is otherwise explained or until the subject is lost to follow-up. Once  
8025 resolved, the appropriate AE/SAE CRF page(s) will be updated. The investigator will  
8026 ensure that follow-up includes any supplemental investigations as may be indicated  
8027 to elucidate the nature and/or causality of the AE or SAE.

8028

8029 The PI may request that the investigator perform or arrange for the conduct of  
8030 supplemental measurements and/or evaluations to elucidate as fully as possible the  
8031 nature and/or causality of the AE or SAE. The investigator is obligated to assist. If a  
8032 subject dies during participation in the study or during a recognized follow-up  
8033 period, the PI will be provided with any post-mortem findings.

8034

8035 New or updated information will be recorded on the originally completed SAE CRF,  
8036 with all changes signed and dated by the investigator or designate. The updated SAE  
8037 CRF should be resent to the PI.

### 8038 **16.3.9 Prompt Reporting of SAEs**

8039 Once the investigator determines that an event meets the protocol definition of an  
8040 SAE, the SAE will be reported to the PI (CURC) within 24 hours.

8041

#### 8042 **16.3.9.1 Responsibility for Reporting Serious Adverse Events to PI**

8043 The Site Investigator must immediately inform the PI (CURC) of all SAE (within 24  
8044 hours) at the following fax number: 1-416-480-6121.

8045

8046 The PI contact list for SAE receipt, fax numbers, telephone numbers and mailing  
8047 addresses is as follows:

8048 Dr. Laurence Klotz

8049 c/o Marlene Keabadjian

8050 Sunnybrook Health Sciences Centre

8051 2075 Bayview Avenue A304

8052 Toronto, Ontario M4N 3M5 Canada

8053 Phone: (416) 480-6100 ext 2890

8054 E-mail: [Laurence.Klotz@sunnybrook.ca](mailto:Laurence.Klotz@sunnybrook.ca)

8055 [Marlene.keabadjian@sunnybrook.ca](mailto:Marlene.keabadjian@sunnybrook.ca)

#### 8056 **16.3.9.2 Completion and Transmission of the SAE Reports**

8057 Once an investigator becomes aware that an SAE has occurred in a study subject,  
8058 she/he will report the information to the PI within 24 hours. The SAE CRF will always  
8059 be completed as thoroughly as possible with all available details of the event, signed  
8060 by the investigator (or designee), and forwarded to the PI within the designated time  
8061 frames. If the investigator does not have all information regarding as SAE, he/she will  
8062 not wait to receive additional information before notifying the PI of the event and  
8063 completing the form. The form will be updated when additional information is  
8064 received.

---

8065

8066 The investigator will always provide an assessment of causality at the time of the  
8067 initial report as described in Section 16.3.6.2.

### 8068 **16.3.10 Post-study AEs and SAEs**

8069 If the investigator learns of any SAE at any time after a subject has been discharged  
8070 from the study, and such event(s) is (are) reasonably related to the study  
8071 intervention, the investigator should promptly notify the PI (CURC).

8072

## 8073 **17. Study Administration**

### 8074 **17.1 Regulatory and Ethical Considerations**

8075 An important consideration is that men are being randomized to one of two biopsy  
8076 techniques when it is not known which will be more effective in diagnosing clinically  
8077 significant prostate cancer. Both diagnostic tests are currently used in everyday  
8078 clinical practice at the institutions involved in the trial. Though systematic TRUS  
8079 guided biopsy could be considered standard of care, there is enough evidence to  
8080 support the concept that MPMRI-targeted biopsy may be as effective, if not more so,  
8081 than systematic TRUS guided biopsy[27]. This study aims to confirm this.

#### 8082 **17.1.1 Ethical Conduct of the Study and Ethics Approval**

8083 The PI and each participating site will obtain approval to conduct the study from the  
8084 Research Ethics Board (REB) prior to initiating the study.

8085

8086 Participating sites from Ontario will use the Ontario Cancer Research Ethics Board  
8087 (OCREB) as their Board of Record.

8088 This study will be conducted in accordance with 'good clinical practice' (GCP) and all  
8089 applicable regulatory requirements, including where applicable, the 2013 version of  
8090 the Declaration of Helsinki.

8091

8092 The investigator is responsible for ensuring that this protocol, the site's informed  
8093 consent form and any other information that will be present to potential subjects  
8094 are reviewed and approved by the appropriate REB. The investigator agrees to allow  
8095 the REB direct access to all relevant regulatory documents. The PI will provide the  
8096 site investigator(s) with relevant document(s)/data that are needed for REB review  
8097 and approval of the study. Before CRFs can be shipped to the site, the PI must  
8098 receive copies of the REB approval, the approved informed consent form and any  
8099 other information that the REB has approved for presentation to potential subjects.

8100

8101 If the protocol, the informed consent form or any other information that the REB has  
8102 approved for presentation to potential subjects is amended during the study, the  
8103 site investigator(s) is responsible for ensuring the REB reviews and approves, where  
8104 applicable, these amended documents. The site investigator(s) must follow all  
8105 applicable regulatory requirements pertaining to the use of an amended informed  
8106 consent form including obtaining the REB approval of the amended form before new  
8107 subjects consent to take part in the study using this version of the form. Copies of  
8108 the REB approval of the amended informed consent form/other information and the

---

8109 approved amended informed consent form/other information must be forwarded to  
8110 the PI promptly.

### 8111 **17.1.2 Informed Consent**

8112 Informed consent will be obtained before the subject can participate in the study.  
8113 The contents and process of obtaining informed consent will be in accordance with  
8114 all applicable regulatory requirements.

8115  
8116 The subject's consent to participate in the study should be obtained after a full  
8117 explanation has been provided of the procedures to be given. Subjects should be  
8118 given sufficient time (at least 24 hours) after being given the study subject  
8119 information sheet to consider and discuss participation in the study with family and  
8120 friends.

8121  
8122 A contact number will be given to the subject should he wish to discuss any aspect of  
8123 the study. Following this, the clinician will determine that the subject is fully  
8124 informed of the study and their participation, in accordance with Good Clinical  
8125 Practice Guidelines. Subjects will always be asked to sign a consent form. One copy  
8126 will be given to the subject, one copy will be kept with subject's hospital notes and  
8127 one copy should be kept in the local investigator's file.

### 8128 **17.1.3 Investigator Reporting Requirements**

8129 The investigator is responsible for reporting SAEs to the REB in accordance with all  
8130 applicable regulations. Furthermore, the investigator may be required to provide  
8131 periodic safety updates on the conduct of the study at his or her site and notification  
8132 of study closure to the REB.

### 8133 **17.2 Study Monitoring**

8134 This study will be monitored by a CRA. The CRA will contact the sites by telephone  
8135 on a predetermined basis and would conduct a monitoring visits based on the data  
8136 entered in the EDC and queries.

8137

8138 During these contacts, the monitor will:

- 8139 • Check the progress of the study
- 8140 • Review study data collected
- 8141 • Conduct source document verification
- 8142 • Identify any issues and address their resolution

8143

8144 This will be done in order to verify that the:

- 8145 • Data are authentic, accurate and complete
- 8146 • Safety and rights of subjects are being protected
- 8147 • Study is conducted in accordance with the currently approved protocol (and  
8148 any amendments), GCP and all applicable regulatory requirements

8149

8150 The investigator agrees to allow CRA personnel direct access to all relevant  
8151 documents and to allocate his/her time and the time of his/her staff to CRA  
8152 personnel to discuss findings and any relevant issues.

---

8153 **17.3 Quality Assurance**

8154 To ensure compliance with GCP and all applicable regulatory requirements,  
8155 regulatory agencies may conduct a regulatory inspection of the study. Such  
8156 audits/inspections can occur at any time during or after completion of the study. If  
8157 an audit or inspection occurs, the investigator and institution agree to allow the  
8158 auditor/inspector direct access to all relevant documents and to allocate his/her  
8159 time and the time of his/her staff to the auditor/inspector to discuss findings and  
8160 any relevant issues.

8161 **17.4 Study and Site Closure**

8162 Upon completion of the study, the site investigator(s) will conduct the following  
8163 activities:

- 8164 • Return of all study data to the Sponsor (CURC)
- 8165 • Submission of all study data and data queries to OCOG
- 8166 • Review of site study records for completeness

8167  
8168 In addition, the Principal Investigator has the right to temporarily suspend or  
8169 prematurely discontinue this study either at a single site or at all sites at any time for  
8170 reasons including but not limited to, safety or ethical issues or severe non-  
8171 compliance. If the PI determines such action is needed, the PI will discuss this with  
8172 the site investigator (including the reasons for taking such action) at that time. When  
8173 feasible, the PI will provide advance notification to the site investigator of the  
8174 impending action prior to it taking effect.

8175  
8176 Individual site Investigators may also terminate their participation in the study at any  
8177 time. If the investigator determines such action is needed, the investigator will  
8178 discuss this with the PI(including the reasons for taking such action) at that time.  
8179 When feasible, the investigator will provide advance notification to the PI of the  
8180 impending action prior to it taking effect.

8181  
8182 The PI will promptly inform all other investigators and/or institutions conducting the  
8183 study if the study is suspended or terminated for safety reasons and will also inform  
8184 the regulatory authorities of the suspension or termination of the study and the  
8185 reason(s) for the action. If required by applicable regulations, the investigator must  
8186 inform the REB promptly and provide the reason for the suspension or termination.

8187  
8188 If the study is prematurely discontinued, all study data must be returned to the PI. In  
8189 addition, the investigator has the responsibility to return any used/unused clinical  
8190 supplies.

8191  
8192 Financial compensation to investigators and/or institutions will be in accordance  
8193 with the agreement established between the investigator and the PI.

8194 **17.5 Records Retention**

8195 Following closure of the study, the site investigator(s) must maintain all site study  
8196 records in a safe and secure location. The records must be maintained to allow easy  
8197 and timely retrieval when needed and whenever feasible, to allow any subsequent

---

8198 review of data in conjunction with assessment of the facility, supporting systems and  
8199 staff.

8200

8201 The site investigator(s) will retain study records to comply with all applicable  
8202 regulatory requirements. The minimum retention time will meet the strictest  
8203 standard applicable to that site for the study as dictated by any institutional  
8204 requirements or local laws or regulations of Health Canada standards/procedures;  
8205 otherwise, the retention period will default to 25 years.

8206

8207 The site investigator(s) must inform the PI of any changes in the archival  
8208 arrangements, including but not limited to the following: archival at an off-site  
8209 facility, transfer of ownership of the records in the event the investigator leaves the  
8210 site. The PI should be informed of this change if it affects their access to the  
8211 information in case of an audit.

## 8212 **17.6 Data Management**

8213 Subject data are collected by the investigator or designee using the CRF within an  
8214 Electronic Data Capture (EDC) system. Subject data necessary for analysis and  
8215 reporting will be entered/transmitted into a validated database. Clinical data  
8216 management will be performed in accordance with applicable standards and data  
8217 cleaning procedures. Database lock will occur when data management quality  
8218 control procedures are completed.

## 8219 **17.7 Publication**

8220 The results from the study will be analyzed and published as soon as possible and is  
8221 appropriate. All study-related communications can only be presented or published  
8222 after approval from all relevant members involved in the trial.

8223

8224 All publications shall include appropriate indication named authors as agreed on by  
8225 the members involved in the trial. For the main study reports, senior and first  
8226 authorship will be determined by agreement of the Chief Investigator, the Principle  
8227 Investigator at time of manuscript drafting. Authorship will be based on  
8228 recommendations of the International Committee of Medical Journal Editors  
8229 ([www.ICMJE.org](http://www.ICMJE.org)) where all authors meet the following for criteria:

8230

- 8231 9. Substantial contributions to the conception or design of the work; or the  
8232 acquisition, analysis, or interpretation of data for the work; AND  
8233 10. Drafting the work or revising it critically for important intellectual content;  
8234 AND  
8235 11. Final approval of the version to be published; AND  
8236 12. Agreement to be accountable for all aspects of the work in ensuring that  
8237 questions related to the accuracy or integrity of any part of the work are  
8238 appropriately investigated and resolved.

8239

8240 If there are no named authors (i.e. group authorship) then a writing committee will  
8241 be identified that would usually include these people. The clinical trials.gov

---

8242 registration number that will be allocated to this trial will be attached to any  
8243 publications resulting from this trial.  
8244  
8245 Trial funding agencies (OICR, PCC and collaborators as appropriate) will be  
8246 acknowledged in all publications.  
8247  
8248 The members of the trial steering committee will be listed with their affiliations in  
8249 the acknowledgements/appendix of the main publication.  
8250  
8251



8252  
8253  
8254  
8255  
8256  
8257  
8258  
8259  
8260  
8261  
8262  
8263  
8264  
8265  
8266  
8267  
8268  
8269  
8270  
8271  
8272  
8273  
8274  
8275  
8276  
8277  
8278  
8279  
8280  
8281  
8282  
8283  
8284  
8285  
8286  
8287  
8288  
8289  
8290  
8291  
8292  
8293  
8294  
8295

---

## 18. References

1. Cooperberg MR, Carroll PR, Klotz L: **Active surveillance for prostate cancer: progress and promise.** *Journal of clinical oncology : official journal of the American Society of Clinical Oncology* 2011, **29**(27):3669-3676.
2. **PI-RADS(TM) Prostate Imaging – Reporting and Data System V.2.** In.: American College of Radiology; 2015.
3. Dickinson L, Ahmed HU, Allen C, Barentsz JO, Carey B, Futterer JJ, Heijmink SW, Hoskin PJ, Kirkham A, Padhani AR *et al*: **Magnetic resonance imaging for the detection, localisation, and characterisation of prostate cancer: recommendations from a European consensus meeting.** *Eur Urol* 2011, **59**(4):477-494.
4. Heidenreich A, Bastian PJ, Bellmunt J, Bolla M, Joniau S, van der Kwast T, Mason M, Matveev V, Wiegel T, Zattoni F *et al*: **EAU guidelines on prostate cancer. part 1: screening, diagnosis, and local treatment with curative intent-update 2013.** *Eur Urol* 2014, **65**(1):124-137.
5. Center MM, Jemal A, Lortet-Tieulent J, Ward E, Ferlay J, Brawley O, Bray F: **International variation in prostate cancer incidence and mortality rates.** *Eur Urol* 2012, **61**(6):1079-1092.
6. **American Cancer Society Prostate Cancer Key Statistics.** Accessed 1st November 2014. Accessed from: <http://www.cancer.org/cancer/prostatecancer/detailedguide/prostate-cancer-key-statistics>[<http://www.cancer.org/cancer/prostatecancer/detailedguide/prostate-cancer-key-statistics>]
7. Loeb S, Heuvel vD, Zhu X, Bangma CH, Schroder FH, Roobol MJ: **Reply from Authors re: Alexandre R. Zlotta, Robert K. Nam. To Biopsy or Not to Biopsy: Thou Shall Think Twice.** *Eur Urol* 2012;**61**:11157. *European urology* 2012, **61**(6):1117-1118.
8. Stamey TA, Freiha FS, McNeal JE, Redwine EA, Whittemore AS, Schmid HP: **Localized prostate cancer. Relationship of tumor volume to clinical significance for treatment of prostate cancer.** *Cancer* 1993, **71**(3 Suppl):933-938.
9. Ahmed HU, Hu Y, Carter T, Arumainayagam N, Lecornet E, Freeman A, Hawkes D, Barratt DC, Emberton M: **Characterizing clinically significant prostate cancer using template prostate mapping biopsy.** *J Urol* 2011, **186**(2):458-464.
10. Netto GJ: **Tumor volume threshold of insignificant prostate cancer--was Dr. Stamey right all along?***J Urol* 2011, **185**(1):10-11.
11. Mowatt G, Scotland G, Boachie C, Cruickshank M, Ford JA, Fraser C, Kurban L, Lam TB, Padhani AR, Royle J *et al*: **The diagnostic accuracy and cost-effectiveness of magnetic resonance spectroscopy and enhanced magnetic resonance imaging techniques in aiding the**

- 
- 8296 **localisation of prostate abnormalities for biopsy: a systematic review**  
8297 **and economic evaluation.** *Health technology assessment* 2013,  
8298 **17(20):vii-xix, 1-281.**
- 8299 12. Morash C, Tey R, Agbassi C, Klotz L, McGowan T, Srigley J, Evans A:  
8300 **Active surveillance for the management of localized prostate cancer:**  
8301 **Guideline recommendations.** *Canadian Urological Association journal =*  
8302 *Journal de l'Association des urologues du Canada* 2015, **9(5-6):171-178.**
- 8303 13. Wilt TJ, Brawer MK, Jones KM, Barry MJ, Aronson WJ, Fox S, Gingrich  
8304 JR, Wei JT, Gilhooly P, Grob BM *et al*: **Radical prostatectomy versus**  
8305 **observation for localized prostate cancer.** *N Engl J Med* 2012,  
8306 **367(3):203-213.**
- 8307 14. Litwin MS, Lubeck DP, Spitalny GM, Henning JM, Carroll PR: **Mental**  
8308 **health in men treated for early stage prostate carcinoma: a**  
8309 **posttreatment, longitudinal quality of life analysis from the Cancer of**  
8310 **the Prostate Strategic Urologic Research Endeavor.** *Cancer* 2002,  
8311 **95(1):54-60.**
- 8312 15. Dall'Era MA, Albertsen PC, Bangma C, Carroll PR, Carter HB, Cooperberg  
8313 MR, Freedland SJ, Klotz LH, Parker C, Soloway MS: **Active surveillance**  
8314 **for prostate cancer: a systematic review of the literature.** *Eur Urol*  
8315 2012, **62(6):976-983.**
- 8316 16. Wilt TJ, MacDonald R, Rutks I, Shamliyan TA, Taylor BC, Kane RL:  
8317 **Systematic review: comparative effectiveness and harms of**  
8318 **treatments for clinically localized prostate cancer.** *Annals of internal*  
8319 *medicine* 2008, **148(6):435-448.**
- 8320 17. **CG58 Prostate cancer: NICE guidance**  
8321 [<http://guidance.nice.org.uk/CG58/NICEGuidance/pdf/English>]
- 8322 18. Nevoux P, Ouzzane A, Ahmed HU, Emberton M, Montironi R, Presti Jr  
8323 JC, Villers A: **Quantitative tissue analyses of prostate cancer foci in an**  
8324 **unselected cystoprostatectomy series.** *BJU Int* 2011.
- 8325 19. Sedelaar JP, Vijverberg PL, De Reijke TM, de la Rosette JJ, Kil PJ,  
8326 Braeckman JG, Hendriks AJ: **Transrectal ultrasound in the diagnosis of**  
8327 **prostate cancer: state of the art and perspectives.** *Eur Urol* 2001,  
8328 **40(3):275-284.**
- 8329 20. Scattoni V, Zlotta A, Montironi R, Schulman C, Rigatti P, Montorsi F:  
8330 **Extended and saturation prostatic biopsy in the diagnosis and**  
8331 **characterisation of prostate cancer: a critical analysis of the literature.**  
8332 *Eur Urol* 2007, **52(5):1309-1322.**
- 8333 21. Djavan B, Ravery V, Zlotta A, Dobronski P, Dobrovits M, Fakhari M, Seitz  
8334 C, Susani M, Borkowski A, Boccon-Gibod L *et al*: **Prospective evaluation**  
8335 **of prostate cancer detected on biopsies 1, 2, 3 and 4: when should we**  
8336 **stop?** *J Urol* 2001, **166(5):1679-1683.**
- 8337 22. Ahmed HU, Kirkham A, Arya M, Illing R, Freeman A, Allen C, Emberton  
8338 M: **Is it time to consider a role for MRI before prostate biopsy?** *Nat Rev*  
8339 *Clin Oncol* 2009, **6(4):197-206.**

- 
- 8340 23. Bossuyt PM, Reitsma JB, Bruns DE, Gatsonis CA, Glasziou PP, Irwig LM,  
8341 Lijmer JG, Moher D, Rennie D, de Vet HC: **Towards complete and**  
8342 **accurate reporting of studies of diagnostic accuracy: the STARD**  
8343 **initiative.** *Clin Radiol* 2003, **58**(8):575-580.
- 8344 24. White S, Hricak H, Forstner R, Kurhanewicz J, Vigneron DB, Zaloudek CJ,  
8345 Weiss JM, Narayan P, Carroll PR: **Prostate cancer: effect of postbiopsy**  
8346 **hemorrhage on interpretation of MR images.** *Radiology* 1995,  
8347 **195**(2):385-390.
- 8348 25. Tanimoto A, Nakashima J, Kohno H, Shinmoto H, Kuribayashi S:  
8349 **Prostate cancer screening: the clinical value of diffusion-weighted**  
8350 **imaging and dynamic MR imaging in combination with T2-weighted**  
8351 **imaging.** *J Magn Reson Imaging* 2007, **25**(1):146-152.
- 8352 26. Kirkham AP, Emberton M, Allen C: **How good is MRI at detecting and**  
8353 **characterising cancer within the prostate?***Eur Urol* 2006, **50**(6):1163-  
8354 1174; discussion 1175.
- 8355 27. Moore CM, Robertson NL, Arsanious N, Middleton T, Villers A, Klotz L,  
8356 Taneja SS, Emberton M: **Image-guided prostate biopsy using magnetic**  
8357 **resonance imaging-derived targets: a systematic review.** *Eur Urol*  
8358 2013, **63**(1):125-140.
- 8359 28. Villers A, Puech P, Mouton D, Leroy X, Ballereau C, Lemaitre L: **Dynamic**  
8360 **contrast enhanced, pelvic phased array magnetic resonance imaging**  
8361 **of localized prostate cancer for predicting tumor volume: correlation**  
8362 **with radical prostatectomy findings.** *J Urol* 2006, **176**(6 Pt 1):2432-  
8363 2437.
- 8364 29. Wu LM, Xu JR, Ye YQ, Lu Q, Hu JN: **The clinical value of diffusion-**  
8365 **weighted imaging in combination with T2-weighted imaging in**  
8366 **diagnosing prostate carcinoma: a systematic review and meta-**  
8367 **analysis.** *AJR Am J Roentgenol* 2012, **199**(1):103-110.
- 8368 30. Wu LM, Xu JR, Gu HY, Hua J, Chen J, Zhang W, Zhu J, Ye YQ, Hu J:  
8369 **Usefulness of diffusion-weighted magnetic resonance imaging in the**  
8370 **diagnosis of prostate cancer.** *Acad Radiol* 2012, **19**(10):1215-1224.
- 8371 31. Umbehr M, Bachmann LM, Held U, Kessler TM, Sulser T, Weishaupt D,  
8372 Kurhanewicz J, Steurer J: **Combined magnetic resonance imaging and**  
8373 **magnetic resonance spectroscopy imaging in the diagnosis of prostate**  
8374 **cancer: a systematic review and meta-analysis.** *Eur Urol* 2009,  
8375 **55**(3):575-590.
- 8376 32. Yamamoto T, Musunuru B, Vesprini D, Zhang L, Ghanem G, Loblaw A,  
8377 Klotz L: **Metastatic Prostate Cancer in Men Initially Managed with**  
8378 **Active Surveillance.** *The Journal of urology* 2015.
- 8379 33. Klotz L, Vesprini D, Sethukavalan P, Jethava V, Zhang L, Jain S,  
8380 Yamamoto T, Mamedov A, Loblaw A: **Long-term follow-up of a large**  
8381 **active surveillance cohort of patients with prostate cancer.** *Journal of*  
8382 *clinical oncology : official journal of the American Society of Clinical*  
8383 *Oncology* 2015, **33**(3):272-277.

- 
- 8384 34. Hoeks CM, Somford DM, van Oort IM, Vergunst H, Oddens JR, Smits  
8385 GA, Roobol MJ, Bul M, Hambroek T, Witjes JA *et al*: **Value of 3-T**  
8386 **Multiparametric Magnetic Resonance Imaging and Magnetic**  
8387 **Resonance-Guided Biopsy for Early Risk Restratification in Active**  
8388 **Surveillance of Low-Risk Prostate Cancer: A Prospective Multicenter**  
8389 **Cohort Study.** *Invest Radiol* 2013.
- 8390 35. Abd-Alazeez M, Ahmed HU, Arya M, Charman SC, Anastasiadis E,  
8391 Freeman A, Emberton M, Kirkham A: **The accuracy of multiparametric**  
8392 **MRI in men with negative biopsy and elevated PSA level-Can it rule**  
8393 **out clinically significant prostate cancer?***Urol Oncol* 2013.
- 8394 36. Kasivisvanathan V, Dufour R, Moore CM, Ahmed HU, Abd-Alazeez M,  
8395 Charman SC, Freeman A, Allen C, Kirkham A, van der Meulen J *et al*:  
8396 **Transperineal magnetic resonance image-targeted prostate biopsy**  
8397 **versus transperineal template prostate biopsy in the detection of**  
8398 **clinically significant prostate cancer.** *J Urol* 2012.
- 8399 37. Haffner J, Lemaitre L, Puech P, Haber GP, Leroy X, Jones JS, Villers A:  
8400 **Role of magnetic resonance imaging before initial biopsy: comparison**  
8401 **of magnetic resonance imaging-targeted and systematic biopsy for**  
8402 **significant prostate cancer detection.** *BJU Int* 2011, **108**(8 Pt 2):E171-  
8403 178.
- 8404 38. Siddiqui MM, Rais-Bahrami S, Turkbey B, George AK, Rothwax J, Shakir  
8405 N, Okoro C, Raskolnikov D, Parnes HL, Linehan WM *et al*: **Comparison**  
8406 **of MR/ultrasound fusion-guided biopsy with ultrasound-guided**  
8407 **biopsy for the diagnosis of prostate cancer.** *Jama* 2015, **313**(4):390-  
8408 397.
- 8409 39. Rosario DJ, Lane JA, Metcalfe C, Donovan JL, Doble A, Goodwin L, Davis  
8410 M, Catto JW, Avery K, Neal DE *et al*: **Short term outcomes of prostate**  
8411 **biopsy in men tested for cancer by prostate specific antigen:**  
8412 **prospective evaluation within ProtecT study.** *BMJ* 2012, **344**:d7894.
- 8413 40. Siddiqui MM, Rais-Bahrami S, Truong H, Stamatakis L, Vourganti S, Nix  
8414 J, Hoang AN, Walton-Diaz A, Shuch B, Weintraub M *et al*: **Magnetic**  
8415 **Resonance Imaging/Ultrasound-Fusion Biopsy Significantly Upgrades**  
8416 **Prostate Cancer Versus Systematic 12-core Transrectal Ultrasound**  
8417 **Biopsy.** *Eur Urol* 2013.
- 8418 41. Wysock JS, Rosenkrantz AB, Huang WC, Stifelman MD, Lepor H, Deng  
8419 FM, Melamed J, Taneja SS: **A Prospective, Blinded Comparison of**  
8420 **Magnetic Resonance (MR) Imaging-Ultrasound Fusion and Visual**  
8421 **Estimation in the Performance of MR-targeted Prostate Biopsy: The**  
8422 **PROFUS Trial.** *Eur Urol* 2013.
- 8423 42. **Undertaking a transrectal ultrasound guided biopsy of the prostate.**  
8424 **Public Health England Prostate Cancer Risk Management Programme**  
8425 **Guidelines.** [http://www.cancerscreening.nhs.uk/prostate/pcrmp-guide-](http://www.cancerscreening.nhs.uk/prostate/pcrmp-guide-1.html)  
8426 [1.html](http://www.cancerscreening.nhs.uk/prostate/pcrmp-guide-1.html) [<http://www.cancerscreening.nhs.uk/prostate/pcrmp-guide-1.html>]

- 
- 8427 43. Epstein JI, Allsbrook WC, Jr., Amin MB, Egevad LL, Committee IG: **The**  
8428 **2005 International Society of Urological Pathology (ISUP) Consensus**  
8429 **Conference on Gleason Grading of Prostatic Carcinoma.** *The American*  
8430 *journal of surgical pathology* 2005, **29**(9):1228-1242.
- 8431 44. Cullen J, Rosner IL, Brand TC, Zhang N, Tsiatis AC, Moncur J, Ali A, Chen  
8432 Y, Knezevic D, Maddala T *et al*: **A Biopsy-based 17-gene Genomic**  
8433 **Prostate Score Predicts Recurrence After Radical Prostatectomy and**  
8434 **Adverse Surgical Pathology in a Racially Diverse Population of Men**  
8435 **with Clinically Low- and Intermediate-risk Prostate Cancer.** *European*  
8436 *urology* 2015, **68**(1):123-131.
- 8437 45. Bryant RJ, Sjoberg DD, Vickers AJ, Robinson MC, Kumar R, Marsden L,  
8438 Davis M, Scardino PT, Donovan J, Neal DE *et al*: **Predicting High-Grade**  
8439 **Cancer at Ten-Core Prostate Biopsy Using Four Kallikrein Markers**  
8440 **Measured in Blood in the ProtecT Study.** *Journal of the National*  
8441 *Cancer Institute* 2015, **107**(7).
- 8442 46. Nam RK, Cheung P, Herschorn S, Saskin R, Su J, Klotz LH, Chang M,  
8443 Kulkarni GS, Lee Y, Kodama RT *et al*: **Incidence of complications other**  
8444 **than urinary incontinence or erectile dysfunction after radical**  
8445 **prostatectomy or radiotherapy for prostate cancer: a population-**  
8446 **based cohort study.** *The Lancet Oncology* 2014, **15**(2):223-231.
- 8447 47. Pocock SJ, Simon R: **Sequential treatment assignment with balancing**  
8448 **for prognostic factors in the controlled clinical trial.** *Biometrics* 1975,  
8449 **31**(1):103-115.
- 8450 48. Moore CM, Kasivisvanathan V, Eggener S, Emberton M, Futterer JJ, Gill  
8451 IS, Grubb Iii RL, Hadaschik B, Klotz L, Margolis DJ *et al*: **Standards of**  
8452 **Reporting for MRI-targeted Biopsy Studies (START) of the Prostate:**  
8453 **Recommendations from an International Working Group.** *Eur Urol*  
8454 2013, **64**(4):544-552.
- 8455 49. Presti JC, Jr.: **Prostate biopsy: how many cores are enough?** *Urologic*  
8456 *oncology* 2003, **21**(2):135-140.  
8457  
8458

8459 **Appendices**

8460 **Appendix 1: Time windows for data collection**

8461

8462 For the overall schedule of visits for each arm please see Section 9.3, Tables 1-3

8463 For details on time windows permitted for each trial intervention to be completed  
8464 please see Table 5 below.

8465

8466 Table 5: Details of time windows permitted for all trial interventions.

8467

| Contact and Purpose if not clear                                                                                                                                     | Time window permitted +/-30 days of scheduled visit                                                                                                                                                                                                                                                                                                                                                                                                  |
|----------------------------------------------------------------------------------------------------------------------------------------------------------------------|------------------------------------------------------------------------------------------------------------------------------------------------------------------------------------------------------------------------------------------------------------------------------------------------------------------------------------------------------------------------------------------------------------------------------------------------------|
| <b>Visit 1</b><br><br>Screening (eligibility review, med hx,)                                                                                                        | Any time following referral of subject.<br><br>Ideally perform as soon as possible following receipt of referral.                                                                                                                                                                                                                                                                                                                                    |
| <b>Visit 1</b><br><br>Consent<br><br>Vitals, DRE<br><br>Randomization<br><br>EQ-5D-5L Questionnaire (baseline)<br><br>Optional blood, urine, semen and tissue sample | Complete only once subject has had 24 hours after receiving the patient information to fully consider the study.<br><br>Ideally on same visit as screening.<br><br>Complete at screening<br><br>Immediately after consent form signed and eligibility is confirmed.<br><br>Complete immediately after consent form is signed<br><br>Complete after additional informed consent signed, after randomization and up until any point prior to a biopsy. |
| <b>Visit 2</b><br><br>MRI                                                                                                                                            | Only for men randomized to this arm.<br><br>Any time following randomization. Ideally within 1 week of randomization.                                                                                                                                                                                                                                                                                                                                |

|                                                                                                          |                                                                                                                                                                                                                                                                                                                                                                                                                                                                                                                                                                                                                                                                                                                                                                                        |
|----------------------------------------------------------------------------------------------------------|----------------------------------------------------------------------------------------------------------------------------------------------------------------------------------------------------------------------------------------------------------------------------------------------------------------------------------------------------------------------------------------------------------------------------------------------------------------------------------------------------------------------------------------------------------------------------------------------------------------------------------------------------------------------------------------------------------------------------------------------------------------------------------------|
| <p><b>Visit 3</b></p> <p>MRI-Targeted Biopsy of Prostate</p>                                             | <p>Only for men randomized to this arm who have a lesion on MRI that needs a biopsy.</p> <p>Any time following the MRI being reported, ideally within 1 week of MRI.</p> <p>Depending on local Urology service structure, an appointment for a biopsy may need to be booked at the same time as the MRI is booked (i.e. immediately after randomization) in order for a slot to be secured for a biopsy to occur in timely fashion.</p> <p>If it is determined from the MRI that a biopsy is not required then the biopsy appointment can be used instead of Visit 4 for follow up of results and treatment decision.</p>                                                                                                                                                              |
| <p><b>Visit 3</b></p> <p>Systematic TRUS guided biopsy</p>                                               | <p>Only for men randomized to this arm.</p> <p>Any time following randomization. Ideally within 4 weeks of randomization.</p>                                                                                                                                                                                                                                                                                                                                                                                                                                                                                                                                                                                                                                                          |
| <p><b>Visit 3</b></p> <p>Immediate post-biopsy questionnaire</p> <p>30-day post-biopsy questionnaire</p> | <p>Should be completed and returned immediately after a biopsy, before the subject leaves the department. As long as questionnaire completed within 24 hours it will be acceptable.</p> <p>To be given to subject to take home after biopsy and completed as instructed on day 30 post-biopsy.</p> <p>To be returned by post or at follow up appointment (Visit 4).</p> <p>If Visit 4 is earlier than 30 days post biopsy then this questionnaire can be given to the research team when 30 days is finally complete.</p> <p>If Visit 4 is on or later than 30 days then this can be returned at the Visit 4 appointment.</p> <p>As long as questionnaire is completed at 30-60 days post-biopsy, it will be acceptable. Ideally the questionnaire should be completed as close as</p> |

|                                                                                                             |                                                                                                                                                                                                                                                                                                                                                                                                                                                                                              |
|-------------------------------------------------------------------------------------------------------------|----------------------------------------------------------------------------------------------------------------------------------------------------------------------------------------------------------------------------------------------------------------------------------------------------------------------------------------------------------------------------------------------------------------------------------------------------------------------------------------------|
| Telephone reminder                                                                                          | <p>possible to 30 days post-biopsy.</p> <p>At 30-days post biopsy a member of the research team will phone the subject to remind them to fill out the 30-day questionnaires</p>                                                                                                                                                                                                                                                                                                              |
| <p><b>Visit 4</b></p> <p>Follow up for results<br/>And treatment Decision</p> <p>EQ-5D-5L Questionnaire</p> | <p>Should be completed as soon as possible following the availability of any pathology results. Alternatively, if a man is in the MRI arm and the MRI is negative, this follow up should occur after the availability of the MRI report. Ideally the follow up appointment should be within 6 weeks of randomization.</p> <p>Depending on local Urology service structure, these results may need to be discussed at an MDT meeting to inform treatment decision.</p> <p>To be completed</p> |
| <p><b>Visit 5</b><br/><b>26 week follow up</b></p>                                                          | <ul style="list-style-type: none"> <li>• Vitals, DRE</li> <li>• PSA</li> <li>• Optional blood, urine</li> </ul>                                                                                                                                                                                                                                                                                                                                                                              |
| <p><b>Visit 6</b><br/>1 year follow up<br/>52 week follow up visit</p>                                      | <p>The following information will be obtained on an annual basis:</p> <ul style="list-style-type: none"> <li>• Vitals, DRE</li> <li>• time to cancer diagnosis;</li> <li>• Gleason score progression;</li> <li>• time to intervention on active surveillance;</li> <li>• time on active surveillance;</li> <li>• results of PSA tests.</li> <li>• results of any off protocol biopsies or MRI</li> <li>• optional sample collection (blood, urine)</li> </ul>                                |
| <p><b>Visit 7</b><br/><b>78 week follow up</b></p>                                                          | <ul style="list-style-type: none"> <li>• Vitals, DRE</li> <li>• PSA</li> <li>• Optional blood, urine</li> </ul>                                                                                                                                                                                                                                                                                                                                                                              |



**Visit 8**

104 week follow up visit

The following information will be obtained on an annual basis:

- Vitals, DRE
- time to cancer diagnosis;
- Gleason score progression;
- time to intervention on active surveillance;
- time on active surveillance;
- results of PSA tests.
- Optional sample collection (blood, urine)

Those subjects randomized to ARM A but who did not have an MPMRI-targeted biopsy will have an additional MPMRI at Visit 8. This will be followed by a targeted-biopsy if results of MRI are positive (PI-RADS 3-5).

Follow-up will cease once treatment beyond active surveillance is undertaken (prostatectomy, radiation therapy, focal therapy, etc.).

8468

8469

8470

---

## Appendix 2: MPMRI Reporting Proforma

8471

8472

8473

**Date of MRI scan:**

|                      |                      |                      |                      |                      |                      |                      |                      |                      |
|----------------------|----------------------|----------------------|----------------------|----------------------|----------------------|----------------------|----------------------|----------------------|
| <input type="text"/> |
| day                  |                      |                      | month                |                      |                      | year                 |                      |                      |

**Date of Report:**

|                      |                      |                      |                      |                      |                      |                      |                      |                      |
|----------------------|----------------------|----------------------|----------------------|----------------------|----------------------|----------------------|----------------------|----------------------|
| <input type="text"/> |
| day                  |                      |                      | month                |                      |                      | year                 |                      |                      |

**Reporting Radiologist:**

8474

8475

8476

8477 Radiologists should annotate this diagram with up to 3 suspicious areas  
 8478 scoring 3 or greater on the PI-RADS v2 scale of suspicion. The three most  
 8479 suspicious areas should be annotated, each with the score clearly marked.  
 8480 "T1" should be the area with the greatest degree of suspicion. If  
 8481 applicable, "T2" should be the area with the next greatest degree of  
 8482 suspicion and finally if applicable, "T3" should be the area with the next  
 8483 greatest degree of suspicion. For each suspicious area, triaxial  
 8484 measurements should be recorded with all 3 measurements in orthogonal  
 8485 planes provided whenever possible. In the PZ, lesions should be measured  
 8486 on ADC. In the TZ, lesions should be measured on T2W. If lesion  
 8487 measurement is difficult or compromised on ADC (for PZ) or T2W (for TZ),  
 8488 measurement should be made on the sequence that show the lesion best.  
 8489 For example, coronal measurements may be best performed in the  
 8490 peripheral zone on T2 images.

8491

8492

8493

8494

8495

8496

8497

8498

8499

8500

8501

8502

8503

8504

8505

8506

8507

8508

8509

8510

8511  
8512  
8513  
8514  
8515  
8516  
8517  
8518  
8519  
8520  
8521  
8522  
8523  
8524  
8525  
8526  
8527  
8528  
8529  
8530  
8531  
8532  
8533  
8534  
8535  
8536  
8537  
8538  
8539  
8540  
8541  
8542  
8543  
8544  
8545  
8546  
8547  
8548  
8549  
8550  
8551  
8552  
8553  
8554

NO DCE (Part 1 or 2) – T2/DWI/ADC  
**DO NOT VIEW DCE – YOU SHOULD NOT KNOW THE PSA**

Draw lesions on diagram below annotating each with the T index (i.e T1; T2...)

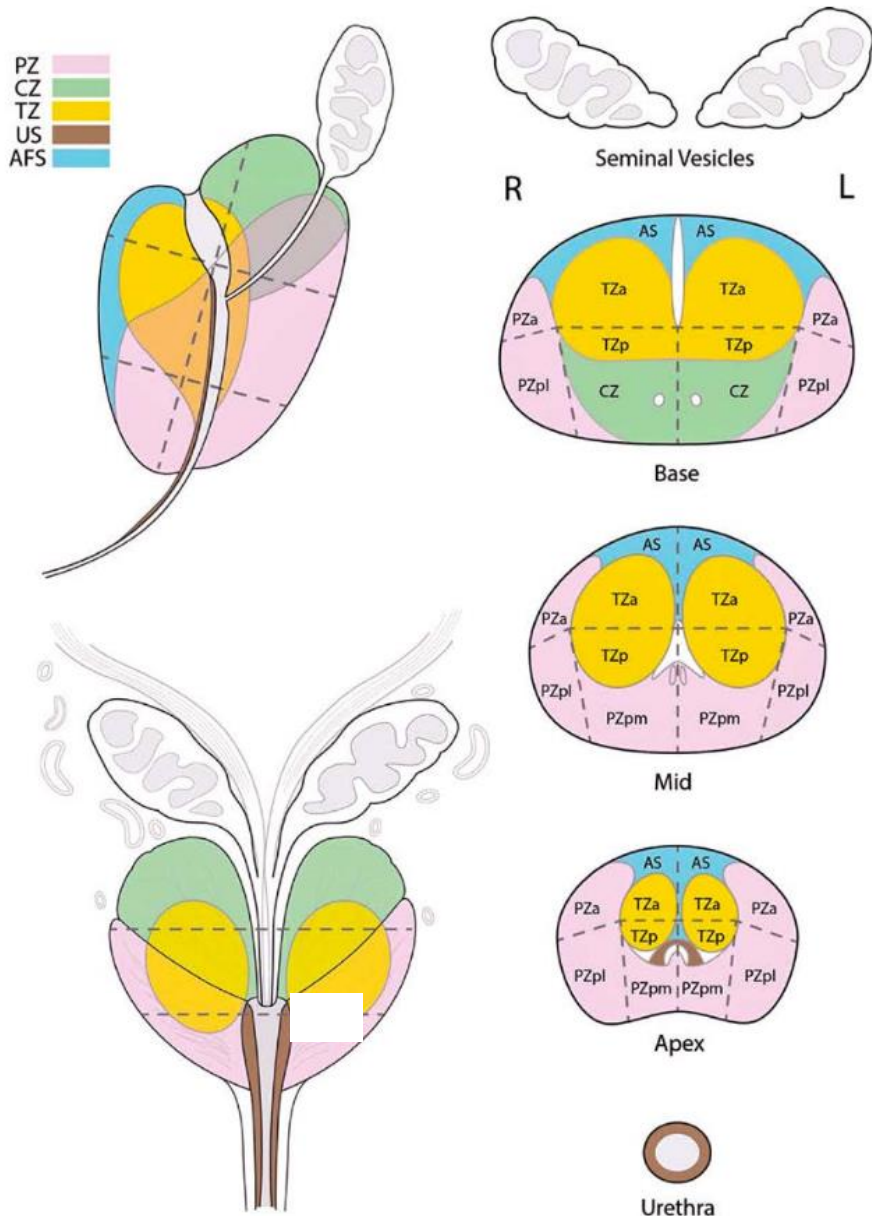

8555  
8556  
8557  
8558  
8559

---

NO DCE (Part 1 or 2) – T2/DWI/ADC  
**DO NOT VIEW DCE – YOU SHOULD NOT KNOW THE  
PSA**

- Image quality:**     **Good**  
                           **Minor image quality issues**  
                           **Acceptable for diagnosis**  
                           **Unacceptable**

8560  
8561  
8562  
8563  
8564  
8565  
8566  
8567

**If image quality is not good please comment:**

\_\_\_\_\_

\_\_\_\_\_

\_\_\_\_\_

---

8568  
8569  
8570  
8571

**How to record locations**

**Location Code Format:** (L/R), (B/M/A), Pi-RadsZone (AS, TZa, TZp, CZ, PZa, PZpl, PZpm)

8572  
8573  
8574

Number of candidate tumor sites: \_\_\_\_\_

8575  
8576

*Target 1 (Highest Pi-Rads score and then largest):*

Present (Y/N): \_\_\_\_\_

8577

Overall Pi-Rads Score(1-5): \_\_\_\_\_ Your Likert Score(1-5): \_\_\_\_\_

8578

Pi-Rads Score (T2) (1-5) : \_\_\_\_\_ Pi-Rads Score (DWI) (1-5): \_\_\_\_\_

8579

Mean ADC: \_\_\_\_\_ Min ADC – single voxel: \_\_\_\_\_ mm<sup>2</sup>/s

8580

x10<sup>-6</sup>

8581

Size: \_\_\_\_\_ x \_\_\_\_\_ x \_\_\_\_\_ mm (Ax1 > Ax2 x SI)

8582

Location(s) (largest to smallest area involved):

8583

\_\_\_\_\_, \_\_\_\_\_, \_\_\_\_\_, \_\_\_\_\_

8584

\_\_\_\_\_, \_\_\_\_\_, \_\_\_\_\_, \_\_\_\_\_ (as per location code

8585

format above)

8586

Extraprostatic extension (Y/N/E-equivocal): \_\_\_\_\_

8587

8588

*Target 2:*

8589

Present (Y/N): \_\_\_\_\_

8590

Overall Pi-Rads Score(1-5): \_\_\_\_\_ Your Likert Score(1-5): \_\_\_\_\_

8591

Pi-Rads Score (T2) (1-5) : \_\_\_\_\_ Pi-Rads Score (DWI) (1-5): \_\_\_\_\_

8592

Mean ADC: \_\_\_\_\_ Min ADC – single voxel: \_\_\_\_\_ mm<sup>2</sup>/s

8593

x10<sup>-6</sup>

8594

Size: \_\_\_\_\_ x \_\_\_\_\_ x \_\_\_\_\_ mm (Ax1 > Ax2 x SI)

8595

Location(s) (largest to smallest area involved):

8596

\_\_\_\_\_, \_\_\_\_\_, \_\_\_\_\_, \_\_\_\_\_

8597

\_\_\_\_\_, \_\_\_\_\_, \_\_\_\_\_, \_\_\_\_\_ (as per location code

8598

format above)

8599

Extraprostatic extension (Y/N/E-equivocal): \_\_\_\_\_

8600

8601

8602

8603 Target 3:

8604 Present (Y/N): \_\_\_\_\_

8605 Overall Pi-Rads Score(1-5): \_\_\_\_\_ Your Likert Score(1-5): \_\_\_\_\_

8606 Pi-Rads Score (T2) (1-5) : \_\_\_\_\_ Pi-Rads Score (DWI) (1-5): \_\_\_\_\_

8607 Mean ADC: \_\_\_\_\_ Min ADC – single voxel: \_\_\_\_\_ mm<sup>2</sup>/s  
8608 x10<sup>-6</sup>

8609 Size: \_\_\_\_\_x\_\_\_\_\_ x \_\_\_\_\_mm (Ax1 > Ax2 x SI)

8610 Location(s) (largest to smallest area involved):

8611 \_\_\_\_\_, \_\_\_\_\_, \_\_\_\_\_, \_\_\_\_\_

8612 \_\_\_\_\_, \_\_\_\_\_, \_\_\_\_\_, \_\_\_\_\_ (as per location code  
8613 format above)

8614 Extraprostatic extension (Y/N/E-equivocal): \_\_\_\_\_

8615

8616 There are more than 3 targets seen (Y/N): \_\_\_\_\_

8617 If yes give describe:

8618 \_\_\_\_\_

8619 \_\_\_\_\_

8620 \_\_\_\_\_

8621 \_\_\_\_\_

8622

8623 LSV invasion (Y/N/E): \_\_\_\_\_ RSV invasion (Y/N/E): \_\_\_\_\_

8624

8625 Adenopathy (Y/N): \_\_\_\_\_

8626

8627 Worst Pi-Rads Score: \_\_\_\_\_

8628

8629 Other Findings:

8630 \_\_\_\_\_

8631 \_\_\_\_\_

8632 \_\_\_\_\_

8633 \_\_\_\_\_

8634

|       |      |       |      |       |      |                |       |    |
|-------|------|-------|------|-------|------|----------------|-------|----|
| _____ | (SI) | _____ | (AP) | _____ | (LR) | <b>Volume:</b> | _____ | cc |
| cm    | x    | cm    | x    | cm    |      |                |       |    |

8635

8636

8637

8638

8639

8640

8641

8642

8643

8644

8645

8646

8647

8648

8649  
8650  
8651  
8652  
8653  
  
8654  
8655  
8656  
8657  
8658  
8659  
8660  
8661  
8662  
8663  
8664  
8665  
8666  
8667  
8668  
8669  
8670  
8671  
8672  
8673  
8674  
8675  
8676  
8677  
8678  
8679  
8680  
8681  
8682  
8683  
8684  
8685  
8686  
8687  
8688  
8689  
8690  
8691  
8692

---

DCE (Part 2 or 2) – T2/DWI/ADC/DCE  
**VIEW DCE – YOU SHOULD NOT KNOW THE PSA**

- Image quality (including DCE):**
- Good**
  - Minor image quality issues (still acceptable)**
  - Acceptable for diagnosis**
  - Unacceptable**

If image quality is not good please comment:

\_\_\_\_\_

\_\_\_\_\_

\_\_\_\_\_

Number of candidate tumor sites: \_\_\_\_\_

There was a change in lesions number or rank when adding DCE sequence  
**(Y/N):** \_\_\_\_\_

If Yes, please give the correspondence between Target numbers with and without DCE (i.e. Target 1 without DCE = Target x with DCE) and **fill in all fields below to avoid confusion. Also draw lesions on diagram below again**

**Correspondence:**

Old T1 = New T\_\_\_\_      Old T2 = New T\_\_\_\_      Old T3 = New  
T\_\_\_\_

8693  
8694  
8695  
8696

**If there is change from Part 1 please redraw all lesions on diagram below annotating each with the T index (i.e T1; T2...)**

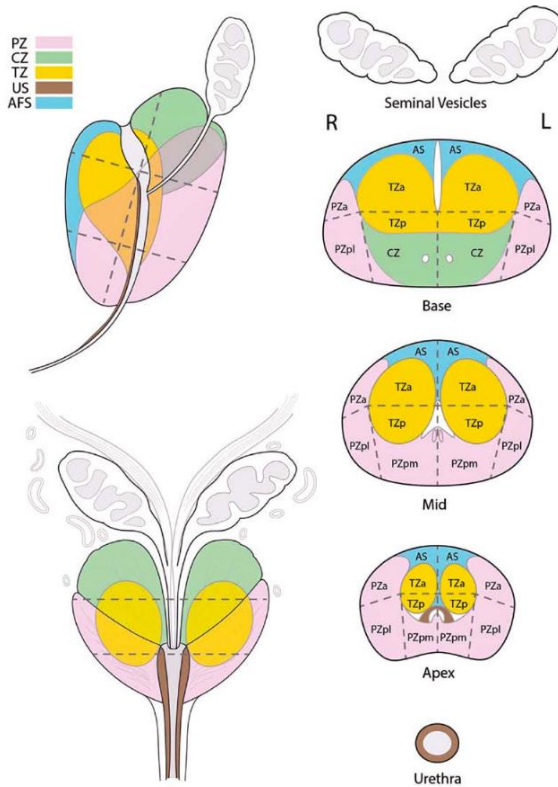

8697

8698 Target 1:

8699 Present (Y/N): \_\_\_\_\_

8700 Change from Part 1 (Y/N): \_\_\_\_\_,

8701 **If YES, complete ALL sections below**

8702 **If NO change in scores, ONLY complete DCE PiRads score below.**

8703 **All other entries are assumed = to Part 1**

8704 Overall Pi-Rads Score: \_\_\_\_\_ Your Likert Score: \_\_\_\_\_

8705 Pi-Rads Score (T2) : \_\_\_\_\_ Pi-Rads Score (DWI): \_\_\_\_\_ **Pi-Rads Score (DCE, 0,1): \_\_\_\_\_**

8706  
8707  
8708 Mean ADC: \_\_\_\_\_ Min ADC – single voxel: \_\_\_\_\_ mm<sup>2</sup>/s  
8709 x10<sup>-6</sup>

8710 Size: \_\_\_\_\_ x \_\_\_\_\_ x \_\_\_\_\_ mm (Ax1 > Ax2 x SI)

8711 Location(s) (largest to smallest area involved):

8712 \_\_\_\_\_ / \_\_\_\_\_ / \_\_\_\_\_ / \_\_\_\_\_

8713 \_\_\_\_\_ / \_\_\_\_\_ / \_\_\_\_\_ / \_\_\_\_\_

8714 Extraprostatic extension (Y/N/E-equivocal): \_\_\_\_\_

8715

8716 Target 2:

8717 Present (Y/N): \_\_\_\_\_

8718 Change from Part 1 (Y/N): \_\_\_\_\_

8719 **If YES, complete ALL sections below**

8720 **If NO change in scores, ONLY complete DCE PiRads score below.**

8721 **All other entries are assumed = to Part 1**

8722

8723

8724 Overall Pi-Rads Score: \_\_\_\_\_ Your Likert Score: \_\_\_\_\_

8725 Pi-Rads Score (T2) : \_\_\_\_\_ Pi-Rads Score (DWI): \_\_\_\_\_ **Pi-Rads Score (DCE,**

8726 **0,1):** \_\_\_\_\_

8727 Mean ADC: \_\_\_\_\_ Min ADC – single voxel: \_\_\_\_\_ mm<sup>2</sup>/s

8728 x10<sup>-6</sup>

8729 Size: \_\_\_\_\_x\_\_\_\_\_ x \_\_\_\_\_mm (Ax1 > Ax2 x SI)

8730 Location(s) (largest to smallest area involved):

8731 \_\_\_\_\_/\_\_\_\_\_/\_\_\_\_\_/\_\_\_\_\_

8732 \_\_\_\_\_/\_\_\_\_\_/\_\_\_\_\_/\_\_\_\_\_

8733 Extraprostatic extension (Y/N/E-equivocal): \_\_\_\_\_

8734

8735 Target 3:

8736 Present (Y/N): \_\_\_\_\_

8737 Change from Part 1 (Y/N): \_\_\_\_\_

8738 **If YES, complete ALL sections below**

8739 **If NO change in scores, ONLY complete DCE PiRads score below.**

8740 **All other entries are assumed = to Part 1**

8741 Overall Pi-Rads Score: \_\_\_\_\_ Your Likert Score: \_\_\_\_\_

8742 Pi-Rads Score (T2) : \_\_\_\_\_ Pi-Rads Score (DWI): \_\_\_\_\_ **Pi-Rads Score (DCE,**

8743 **0,1):** \_\_\_\_\_

8744 Mean ADC: \_\_\_\_\_ Min ADC – single voxel: \_\_\_\_\_ mm<sup>2</sup>/s

8745 x10<sup>-6</sup>

8746 Size: \_\_\_\_\_x\_\_\_\_\_ x \_\_\_\_\_mm (Ax1 > Ax2 x SI)

8747 Location(s) (largest to smallest area involved):

8748 \_\_\_\_\_/\_\_\_\_\_/\_\_\_\_\_/\_\_\_\_\_

8749 \_\_\_\_\_/\_\_\_\_\_/\_\_\_\_\_/\_\_\_\_\_

8750 Extraprostatic extension (Y/N/E-equivocal): \_\_\_\_\_

8751

8752 There are more than 3 targets seen (Y/N): \_\_\_\_\_

8753 If yes give describe:

8754 \_\_\_\_\_

8755 \_\_\_\_\_

8756 \_\_\_\_\_

8757 \_\_\_\_\_

8758

8759 LSV invasion (Y/N/E): \_\_\_\_\_ RSV invasion (Y/N/E): \_\_\_\_\_

8760

8761 Adenopathy (Y/N): \_\_\_\_\_

8762

8763 Worst Pi-Rads Score: \_\_\_\_\_

8764

8765 Other Findings:

8766 \_\_\_\_\_

8767 \_\_\_\_\_

8768 \_\_\_\_\_

8769 \_\_\_\_\_

8770

8771 **Safety:**

8772 Was there an immediate reaction to Gd contrast injection (Y/N): \_\_\_\_\_

8773



---

8774 If yes, please give details:

8775

8776

8777

**Will subject require an TRUS/MRI-fused No Yes  
biopsy (Pi-Rads  $\geq 3$ )?**

8778

8779 Please send this form and a DVD with the images AND completed MRI

8780 Report to:

8781

8782 Marlene Kebabdjian

8783 Sunnybrook Health Sciences Center

8784 *Urology Research, A304*

8785 2075 Bayview Avenue

8786 Toronto, Ontario M4N 3M5

8787

8788

---

8789

8790

8791

8792

8793

8794

8795

8796

8797

8798

8799

8800

8801

8802

8803

8804

8805

8806

8807

8808

8809

8810

8811

8812

8813

8814

8815

8816

8817

8818

8819

8820

8821

8822

8823

8824

8825

8826

8827

### Appendix 3: Example of systematic TRUS guided biopsy schema

8828

8829 Figure depicting 12-core systematic TRUS guided biopsyschema that sites are  
8830 recommended to follow. Axial/coronal sections of a prostate gland (left) showing  
8831 biopsy courses of the 12 biopsies performed under ultrasound guidance with an end  
8832 fire probe. Upperright: axial planes in the sagittal view. a, base; b, mid-gland; c,  
8833 apex.F romHaffneret al[37].



8834

---

8835 **Appendix 4: 2-page EQ-5D-5L Questionnaire**

8836 Under each heading, please tick the ONE box that best describes your health TODAY

8837

8838 **MOBILITY**

8839 I have no problems in walking about

8840 I have slight problems in walking about

8841 I have moderate problems in walking about

8842 I have severe problems in walking about

8843 I am unable to walk about

8844

8845 **SELF-CARE**

8846 I have no problems washing or dressing myself

8847 I have slight problems washing or dressing myself

8848 I have moderate problems washing or dressing myself

8849 I have severe problems washing or dressing myself

8850 I am unable to wash or dress myself

8851

8852 **USUAL ACTIVITIES** (*e.g. work, study, housework,*

8853 *family or leisure activities*)

8854 I have no problems doing my usual activities

8855 I have slight problems doing my usual activities

8856 I have moderate problems doing my usual activities

8857 I have severe problems doing my usual activities

8858 I am unable to do my usual activities

8859

8860 **PAIN / DISCOMFORT**

8861 I have no pain or discomfort

8862 I have slight pain or discomfort

8863 I have moderate pain or discomfort

8864 I have severe pain or discomfort

8865 I have extreme pain or discomfort

8866

8867 **ANXIETY / DEPRESSION**

8868 I am not anxious or depressed

8869 I am slightly anxious or depressed

8870 I am moderately anxious or depressed

8871 I am severely anxious or depressed

8872 I am extremely anxious or depressed

8873

8874 © 1990 EuroQol Group. EQ-5D™ is a trade mark of the EuroQol Group

8875 • We would like to know how good or bad your health  
8876 is TODAY.

The best health  
you can imagine

8877 • This scale is numbered from 0 to 100.

8878 • 100 means the best health you can imagine.

8879 0 means the worst health you can imagine.

8880 • Mark an X on the scale to indicate how your health is  
8881 TODAY.

8882 • Now, please write the number you marked on the  
8883 scale in the box below.

8884

8885

8886

8887

8888

8889

YOUR HEALTH TODAY=



The worst health  
you can imagine

**Appendix 5: Immediate post biopsy questionnaire**

**Immediate post-biopsy questionnaire**

*Please ask the patient to fill this out after the biopsy, before they leave the department.*

Please tick the box corresponding to the number, which describes how you felt immediately after the biopsy procedure:

1. Overall, how much discomfort did the biopsy procedure cause you?

|                          |                          |                            |                          |                          |                          |                          |                          |                                  |                          |                          |
|--------------------------|--------------------------|----------------------------|--------------------------|--------------------------|--------------------------|--------------------------|--------------------------|----------------------------------|--------------------------|--------------------------|
| 0                        | 1                        | 2                          | 3                        | 4                        | 5                        | 6                        | 7                        | 8                                | 9                        | 10                       |
| <input type="checkbox"/> | <input type="checkbox"/> | <input type="checkbox"/>   | <input type="checkbox"/> | <input type="checkbox"/> | <input type="checkbox"/> | <input type="checkbox"/> | <input type="checkbox"/> | <input type="checkbox"/>         | <input type="checkbox"/> | <input type="checkbox"/> |
| <b>No Discomfort</b>     |                          | <b>Moderate Discomfort</b> |                          |                          |                          |                          |                          | <b>Worst Discomfort Possible</b> |                          |                          |

2. Overall, how much pain did the biopsy procedure cause you?

|                          |                          |                          |                          |                          |                          |                          |                          |                            |                          |                          |
|--------------------------|--------------------------|--------------------------|--------------------------|--------------------------|--------------------------|--------------------------|--------------------------|----------------------------|--------------------------|--------------------------|
| 0                        | 1                        | 2                        | 3                        | 4                        | 5                        | 6                        | 7                        | 8                          | 9                        | 10                       |
| <input type="checkbox"/>   | <input type="checkbox"/> | <input type="checkbox"/> |
| <b>No Pain</b>           |                          | <b>Moderate Pain</b>     |                          |                          |                          |                          |                          | <b>Worst pain Possible</b> |                          |                          |

- ?
- ?
- ?
- ?
- ?
- ?
- ?
- ?
- ?
- ?
- ?
- ?
- ?
- ?
- ?
- ?
- ?
- ?
- ?
- ?

**Please complete the next page of questions**

---

Did you experience any of the following in the month **before** your biopsy procedure.  
For each question, tick the box that applies:

3. Fevers

Yes  
  
1

No  
  
2

4. Blood in the urine

Yes  
  
1

No  
  
2

5. Blood in the semen

Yes  
  
1

No  
  
2

6. Blood in the stools or from the back passage

Yes  
  
1

No  
  
2

7. Acute urinary retention, meaning the painful inability to pass urine which was relieved by passing a catheter into the bladder through the penis

Yes  
  
1

No  
  
2

8. Erectile dysfunction, meaning the persistent inability to get and maintain an erection sufficient to allow satisfactory sexual performance

Yes  
  
1

No  
  
2

9. Urinary incontinence, meaning any undesired leakage of urine

Yes  
  
1

No  
  
2

10. Urinary tract infection diagnosed by a healthcare professional

Yes  
  
1

No  
  
2

11. Pain at the site where the biopsies were taken from

Yes  
  
1

No  
  
2

**Thank you for completing the questionnaire. Please hand this to a member of staff before you leave. Please ensure you are given the 30-day questionnaire for completion at 30 days following the biopsy.**

8893

**Appendix 6: 30-day post biopsy questionnaire**

**30-day post biopsy questionnaire**

30-days after the biopsy procedure, the patient should complete this questionnaire:

Did you experience the following problem in the 30-days after the biopsy procedure:

1. Fevers

Yes  No

1 2

2. If you answered yes, specify on which days after the biopsy you had this? (*tick as many boxes as are applicable*)

Days: 0-2 3-5 6-10 11-15 16-20 21-30

|   |   |   |   |   |   |
|---|---|---|---|---|---|
|   |   |   |   |   |   |
| 1 | 2 | 3 | 4 | 5 | 6 |

3. If you answered yes, how much of a problem was this for you? (*tick one box*)

Not a problem at all Minor Problem Moderate Problem Major Problem

1 2 3 4

Did you experience the following problem in the 30-days after the biopsy procedure:

4. Blood in the urine

Yes  No

1 2

5. If you answered yes, specify on which days after the biopsy you had this? (*tick as many boxes as are applicable*)

Days: 0-2 3-5 6-10 11-15 16-20 21-30

|   |   |   |   |   |   |
|---|---|---|---|---|---|
|   |   |   |   |   |   |
| 1 | 2 | 3 | 4 | 5 | 6 |

6. If you answered yes, how much of a problem was this for you? (*tick one box*)

Not a problem at all Minor Problem Moderate Problem Major Problem

1 2 3 4

Did you experience the following problem in the 30-days after the biopsy procedure:

7. Blood in the semen

Yes  No

1 2

8. If you answered yes, specify on which days after the biopsy you had this? (*tick as many boxes as are applicable*)

Days: 0-2 3-5 6-10 11-15 16-20 21-30

|   |   |   |   |   |   |
|---|---|---|---|---|---|
|   |   |   |   |   |   |
| 1 | 2 | 3 | 4 | 5 | 6 |

9. If you answered yes, how much of a problem was this for you? (*tick one box*)

Not a problem at all Minor Problem Moderate Problem Major Problem

1 2 3 4

Did you experience the following problem in the 30-days after the biopsy procedure:

10. Blood in the stools or from the back passage

Yes  No   
1 2

11. If you answered yes, how long after the biopsy did you have this for? (*tick one*)

Days: 0-2 3-5 6-10 11-15 16-20 21-30

|                          |                          |                          |                          |                          |                          |
|--------------------------|--------------------------|--------------------------|--------------------------|--------------------------|--------------------------|
| <input type="checkbox"/> |
| 1                        | 2                        | 3                        | 4                        | 5                        | 6                        |

12. If you answered yes, how much of a problem was this for you? (*tick one box*)

Not a problem at all Minor Problem Moderate Problem Major Problem

|                          |                          |                          |                          |
|--------------------------|--------------------------|--------------------------|--------------------------|
| <input type="checkbox"/> | <input type="checkbox"/> | <input type="checkbox"/> | <input type="checkbox"/> |
| 1                        | 2                        | 3                        | 4                        |

Did you experience the following problem in the 30-days after the biopsy procedure:

13. Acute urinary retention, meaning the painful inability to pass urine which was relieved by passing a catheter into the bladder through the penis

Yes  No   
1 2

14. If you answered yes, how long after the biopsy did this occur? (*tick one*)

Days: 0-2 3-5 6-10 11-15 16-20 21-30

|                          |                          |                          |                          |                          |                          |
|--------------------------|--------------------------|--------------------------|--------------------------|--------------------------|--------------------------|
| <input type="checkbox"/> |
| 1                        | 2                        | 3                        | 4                        | 5                        | 6                        |

15. If you answered yes, how much of a problem was this for you? (*tick one box*)

Not a problem at all Minor Problem Moderate Problem Major Problem

|                          |                          |                          |                          |
|--------------------------|--------------------------|--------------------------|--------------------------|
| <input type="checkbox"/> | <input type="checkbox"/> | <input type="checkbox"/> | <input type="checkbox"/> |
| 1                        | 2                        | 3                        | 4                        |

Did you experience the following problem in the 30-days after the biopsy procedure:

16. Erectile dysfunction, meaning the persistent inability to get and maintain an erection sufficient to allow satisfactory sexual performance

Yes  No   
1 2

17. If you answered yes, how long after the biopsy did you have this for? (*tick one*)

Days: 0-2 3-5 6-10 11-15 16-20 21-30

|                          |                          |                          |                          |                          |                          |
|--------------------------|--------------------------|--------------------------|--------------------------|--------------------------|--------------------------|
| <input type="checkbox"/> |
| 1                        | 2                        | 3                        | 4                        | 5                        | 6                        |

18. If you answered yes, how much of a problem was this for you? (*tick one box*)

Not a problem at all Minor Problem Moderate Problem Major Problem

|                          |                          |                          |                          |
|--------------------------|--------------------------|--------------------------|--------------------------|
| <input type="checkbox"/> | <input type="checkbox"/> | <input type="checkbox"/> | <input type="checkbox"/> |
| 1                        | 2                        | 3                        | 4                        |

8896



Did you experience the following problem in the 30-days after the biopsy procedure:

19. Urinary incontinence, meaning any undesired leakage of urine

Yes  No   
1 2

20. If you answered yes, how long after the biopsy did you have this for? (*tick one*)

Days: 0-2 3-5 6-10 11-15 16-20 21-30

|                          |                          |                          |                          |                          |                          |
|--------------------------|--------------------------|--------------------------|--------------------------|--------------------------|--------------------------|
| <input type="checkbox"/> |
| 1                        | 2                        | 3                        | 4                        | 5                        | 6                        |

21. If you answered yes, how much of a problem was this for you? (*tick one box*)

Not a problem at all Minor Problem Moderate Problem Major Problem

1 2 3 4

Did you experience the following problem in the 30-days after the biopsy procedure:

22. Urinary tract infection diagnosed by a healthcare professional

Yes  No   
1 2

23. If you answered yes, how long after the biopsy did this occur after? (*tick one*)

Days: 0-2 3-5 6-10 11-15 16-20 21-30

|                          |                          |                          |                          |                          |                          |
|--------------------------|--------------------------|--------------------------|--------------------------|--------------------------|--------------------------|
| <input type="checkbox"/> |
| 1                        | 2                        | 3                        | 4                        | 5                        | 6                        |

24. If you answered yes, how much of a problem was this for you? (*tick one box*)

Not a problem at all Minor Problem Moderate Problem Major Problem

1 2 3 4

Did you experience the following problem in the 30-days after the biopsy procedure:

25. Pain at the site where the biopsies were taken from

Yes  No   
1 2

26. If you answered yes, how long after the biopsy did you have this for? (*tick one*)

Days: 0-2 3-5 6-10 11-15 16-20 21-30

|                          |                          |                          |                          |                          |                          |
|--------------------------|--------------------------|--------------------------|--------------------------|--------------------------|--------------------------|
| <input type="checkbox"/> |
| 1                        | 2                        | 3                        | 4                        | 5                        | 6                        |

27. If you answered yes, how much of a problem was this for you? (*tick one box*)

Not a problem at all Minor Problem Moderate Problem Major Problem

1 2 3 4

8897

28. Please list any **new** medications that you have taken **since the biopsy**. Do not list your regular medications but do list any **new** medications started related to the biopsy. Think especially about any painkillers or antibiotics that you may have taken. Only list the medications if you have taken them. An example is given in the first box:

| Name of medication        | Dosage       | Number of doses per day | Number of days |
|---------------------------|--------------|-------------------------|----------------|
| <i>e.g. ciprofloxacin</i> | <i>500mg</i> | <i>2</i>                | <i>3</i>       |
|                           |              |                         |                |
|                           |              |                         |                |
|                           |              |                         |                |
|                           |              |                         |                |
|                           |              |                         |                |
|                           |              |                         |                |
|                           |              |                         |                |

29. Since the biopsy, have you had contacts with hospital services for reasons related to the biopsy, which were unplanned and not part of the routine study visits?

*Please answer yes if you have had any unplanned contact with any healthcare staff e.g. doctor, nurse, other. Please also answer yes if you have had any unplanned consultations with healthcare staff over the phone*

Yes  
  
 1

No  
  
 2

30. If yes, please answer describe:

(i) who the contact was with (e.g. nurse/doctor/other)

(ii) reason for contact (e.g. concern over fevers)

(iii) manner of contact (e.g. telephone/attendance at outpatient clinic/attendance in accident and emergency)

(iv) any treatment you received (please be as specific as possible e.g. "I was admitted to the ward and treated for an infection of the blood stream for 5 days of intravenous antibiotics with 1.2g co-amoxiclav three times a day and I had 2 days of painkillers with intravenous paracetamol 1g four times a day"):

8898

31. How many times, if any, have you attended the accident and emergency department?

32. How many nights, if any, have you been admitted to hospital as an inpatient?

33. How many days, if any, have you been admitted to a day ward in hospital without staying the night?

34. How many days, if any, have you been admitted to an intensive care unit for?

35. Since the biopsy, have you had contact with the community healthcare team for reasons related to the biopsy?

*Please answer yes if you have had any contact with any healthcare staff in the community e.g. GP, practice nurse, community nurse, other. Please also answer yes if you have had any consultations with community healthcare staff over the phone*

Yes

1

No

2

36. If yes, please answer describe:

(i) who the contact was with (e.g. nurse/doctor/other)

(ii) reason for contact (e.g. concern over fevers)

(iii) manner of contact (e.g. telephone/attendance at GP surgery/home visit)

(iv) any treatment you received (please be as specific as possible e.g. "I received 5 days of oral antibiotics for a urinary tract infection- 625mg co-amoxiclav three times a day and I had 2 days of painkillers with paracetamol 1g four times a day"):

8899

8900

37. Have you felt unwell in any other way that we have not asked that you feel is due to the biopsy?

Yes  
  
1

No  
  
2

38. If you answered yes, please describe:

39. If you answered yes, how long after the biopsy did you have this for? (*tick one*)

| Days: | 0-2                      | 3-5                      | 6-10                     | 11-15                    | 16-20                    | 21-30                    |
|-------|--------------------------|--------------------------|--------------------------|--------------------------|--------------------------|--------------------------|
|       | <input type="checkbox"/> |
|       | 1                        | 2                        | 3                        | 4                        | 5                        | 6                        |

40. If you answered yes, how much of a problem was this for you? (*tick one box*)

Not a problem

at all  
  
1

Minor Problem

2

Moderate Problem

3

Major Problem

4

41. If **another biopsy** in the future was medically necessary, how much of a problem would it be for you to undergo the same procedure? (*tick one box*)

Not a problem

at all  
  
1

Minor Problem

2

Moderate Problem

3

Major Problem

4

?

?

**Thank you for completing the questionnaire. Please post the questionnaire in the pre-paid self-addressed envelope or give to the research team at your next visit. Please contact us if you have any queries.**

?

8901  
8902

8903

8904 June 30, 2017

8905

---

**PRECISE Trial: Amendment 3**

8906

**Summary of Changes**

8907 The purpose of this Amendment is to provide comprehensive explanation regarding  
8908 the correlative sample collection, it's custodianship and it's intended use.

8909 The Amendment also identifies the collaborators involved in the PRECISE Trial.

8910 In addition, minor administrative changes were made to the current protocol to  
8911 avoid discrepancy. Minor errors were corrected.

8912 The following changes were made:

- 8913 • Version date to reflect Amendment 3: 30 June 2017
- 8914 • Study Objectives: Page 3, Secondary Objectives: #7 has been rephrased, to  
8915 be more explanatory.
- 8916 • Section 5.2 Methods: additional paragraph identifying the plan for MRI  
8917 follow up.
- 8918 • Section 9.2 Study Trial Schema: The trial schema has been revised to  
8919 reflect the MRI follow-up schedule.
- 8920 • Section 9.3 Table 1: DRE has been given it's own line item, no longer being  
8921 done at 6 and 18 months.
- 8922 • Section 9.3 Table 1: Urine will no longer be collected at 6 and 18 months.
- 8923 • Section 9.3 Table 2: DRE has been given it's own line item, no longer being  
8924 done at 6 and 18 months.
- 8925 • Section 9.3 Table 2: Urine will no longer be collected at 6 and 18 months.
- 8926 • Section 9.3 Table 3: DRE has been given it's own line item, no longer being  
8927 done at 6 and 18 months.
- 8928 • Section 9.3 Table 3: Urine will no longer be collected at 6 and 18 months.
- 8929 • Section 10.11: All patients in both Arm A and B who have remained  
8930 undiagnosed or untreated (on active surveillance) will have a follow up  
8931 MRI 2 years after study entry.
- 8932 • Section 10.12 Additional tests for biomarker discovery-Optional: the  
8933 addition of general information regarding the assays being collected.
- 8934 • Addition of Section 10.12.2 Correlative Science Component: The addition  
8935 of comprehensive information regarding Correlative Science Component  
8936 -inclusion of biomarker, urine, semen, tissue testing; information has  
8937 been added to this section to reflect the biomaterial testing that will take  
8938 place during the study by each collaborator.
- 8939 • Addition of collaborators and banking address in newly added Section  
8940 10.12.2
- 8941 • Deletion of 'completed AEs' from page 54
- 8942 • Deletion of 'The first' in Section 16.3.6 Recording/Reporting AEs and SAEs
- 8943 • Appendix 2: MPMRI Reporting Proforma: revised, for clarity.

8944

8945

---

8946 **1. Title Page**

8947 *Full title:*

8948 **A phase III multi-centre open-label randomized controlled trial of**  
8949 **multi-parametric magnetic resonance imaging (MRI)-targeted biopsy**  
8950 **compared to systematic trans-rectal ultrasound (TRUS) guided biopsy**  
8951 **for the diagnosis of prostate cancer in men without prior biopsy.**

8952

8953 **3. Short title: Prostate Evaluation for Clinically Important disease:**  
8954 **MRI vs Standard Evaluation procedures. (PRECISE)**

8955

8956 **Date: 30 June 2017**

8957 **Version 4.0**

8958

8959 **Sponsor:**

8960 Canadian Urology Research Consortium (CURC)

8961

8962 **Principal Investigator:**

8963 Dr. Laurence Klotz

8964 Professor of Surgery, University of Toronto

8965 Sunnybrook Health Sciences Centre

8966 2075 Bayview Avenue, #MG 408

8967 Toronto Ontario M4N3M5 Canada

8968 Voice 416 480 4673

8969 Fax 416 480 6121

8970

8971 **Co-Principal Investigators:**

8972 Dr. Masoom A. Haider

8973 Sunnybrook Health Sciences Centre

8974 2075 Bayview Avenue, Room AG 57

8975 Toronto Ontario M4N 3M5 Canada

8976

8977 Dr. Andrew Loblaw

8978 Sunnybrook Health Sciences Centre

8979 2075 Bayview Avenue, Room T2 161

8980 Toronto Ontario M4N 3M5 Canada

8981

8982 **Co- Investigators:**

8983 Dr. Laurent Milot

8984 Sunnybrook Health Sciences Centre

8985 2075 Bayview Avenue, Room AG 279

8986 Toronto Ontario M4N 3M5 Canada

8987

8988 Dr. Craig Earle

8989 Sunnybrook Health Sciences Centre

8990 2075 Bayview Avenue

8991 Toronto Ontario M4N 3M5 Canada

8992  
8993  
8994  
8995  
8996  
8997  
8998  
8999  
9000  
9001  
9002  
9003  
9004  
9005  
9006  
9007  
9008  
9009  
9010  
9011  
9012  
9013  
9014  
9015  
9016  
9017  
9018  
9019  
9020  
9021  
9022  
9023  
9024  
9025  
9026  
9027  
9028

---

**Confidential**

The information provided in this document is strictly confidential and is intended solely for the guidance of the clinical investigation. Reproduction or disclosure of this document - whether in part or in full - to parties not associated with the clinical investigation, or its use for any other purpose, without the prior written consent of the PI is not permitted.

**2. Signature of Investigators**

**A phase III multi-centre open-label randomized controlled trial of multi-parametric magnetic resonance imaging (MRI)-targeted biopsy compared to systematic trans-rectal ultrasound (TRUS) guided biopsy for the diagnosis of prostate cancer in men without prior biopsy.**

**Date: 30 June 2017**

**Version 4.0**

The signatory agrees to the content of the final clinical study protocol as presented.

Signature: \_\_\_\_\_

Name: \_\_\_\_\_

Title: \_\_\_\_\_

Date: \_\_\_\_\_

Site name: \_\_\_\_\_

### 3. Synopsis

|                      |                                                                                                                                                                                                                                                                                                                                                                                                                                                                                                                                                                                                                                                                                                                                                                                                                                                                                                                                                                                                                                                                                                                                                                                                                                                                                                                                                                                                                                                                                                                                                                                                                                                                                                                                                                                                                                                                                                                                                               |
|----------------------|---------------------------------------------------------------------------------------------------------------------------------------------------------------------------------------------------------------------------------------------------------------------------------------------------------------------------------------------------------------------------------------------------------------------------------------------------------------------------------------------------------------------------------------------------------------------------------------------------------------------------------------------------------------------------------------------------------------------------------------------------------------------------------------------------------------------------------------------------------------------------------------------------------------------------------------------------------------------------------------------------------------------------------------------------------------------------------------------------------------------------------------------------------------------------------------------------------------------------------------------------------------------------------------------------------------------------------------------------------------------------------------------------------------------------------------------------------------------------------------------------------------------------------------------------------------------------------------------------------------------------------------------------------------------------------------------------------------------------------------------------------------------------------------------------------------------------------------------------------------------------------------------------------------------------------------------------------------|
| Title                | A phase III multi-centre, open-label randomized controlled trial of multi-parametric magnetic resonance imaging (MRI)-targeted biopsy compared to systematic trans-rectal ultrasound (TRUS) guided biopsy for the diagnosis of prostate cancer in men without prior biopsy.                                                                                                                                                                                                                                                                                                                                                                                                                                                                                                                                                                                                                                                                                                                                                                                                                                                                                                                                                                                                                                                                                                                                                                                                                                                                                                                                                                                                                                                                                                                                                                                                                                                                                   |
| Short Title          | <u>P</u> rostate <u>E</u> valuation for <u>C</u> linically <u>I</u> mportant disease: MRI vs <u>S</u> tandard <u>E</u> valuation procedures. (PRECISE)                                                                                                                                                                                                                                                                                                                                                                                                                                                                                                                                                                                                                                                                                                                                                                                                                                                                                                                                                                                                                                                                                                                                                                                                                                                                                                                                                                                                                                                                                                                                                                                                                                                                                                                                                                                                        |
| Clinical study phase | Phase III                                                                                                                                                                                                                                                                                                                                                                                                                                                                                                                                                                                                                                                                                                                                                                                                                                                                                                                                                                                                                                                                                                                                                                                                                                                                                                                                                                                                                                                                                                                                                                                                                                                                                                                                                                                                                                                                                                                                                     |
| Study Objectives     | <p><b>Primary Objective</b></p> <p>To determine whether the proportion of men with clinically significant cancer (Gleason <math>\geq 7</math>) detected by MRI-targeted biopsy is no less than systematic TRUS guided biopsy.</p> <p><b>Secondary Objectives</b></p> <ol style="list-style-type: none"> <li>40. To determine whether the proportion of men with clinically significant cancer (Gleason <math>\geq 7</math>) detected by MRI-targeted biopsy is greater than systematic TRUS guided biopsy.</li> <li>41. Proportion of men in each arm with clinically insignificant cancer detected.</li> <li>42. Proportion of men in each arm with Gleason <math>\geq 4+3</math> detected.</li> <li>43. Proportion of men in MRI arm who avoid biopsy.</li> <li>44. Proportion of men in the MRI arm whom the PI-RADS score for suspicion of clinically significant cancer was 3, 4 or 5 but no clinically significant cancer was detected.</li> <li>45. Proportion of men in each arm who go on to definitive local treatment (e.g. radical prostatectomy, radiotherapy, brachytherapy) or systemic treatment (e.g. hormone therapy, chemotherapy).</li> <li>46. Proportion of men in each arm who do not have significant cancer found at baseline who develop a positive MRI and/or have a progressive lesion found on MRI and/or have Gleason <math>\geq 7</math> cancer detected on a repeat biopsy (systematic or targeted) by 2 years</li> <li>47. Proportion of men with post-biopsy adverse events</li> <li>48. Health-related quality of life scores.</li> <li>49. Proportion with Gleason grade upgrading in men undergoing radical prostatectomy.</li> <li>50. To determine the cost per diagnosis of cancer.</li> <li>51. To determine the impact of the addition of Gd based contrast compared to a non contrast abbreviated MRI protocol on target yield</li> <li>52. To determine if a radiologist Likert score not based on PI-</li> </ol> |



|                                           |                                                                                                                                                                                                                                                                                                                                                                                                                                                                                                                                                                                                                                                                                                                                    |
|-------------------------------------------|------------------------------------------------------------------------------------------------------------------------------------------------------------------------------------------------------------------------------------------------------------------------------------------------------------------------------------------------------------------------------------------------------------------------------------------------------------------------------------------------------------------------------------------------------------------------------------------------------------------------------------------------------------------------------------------------------------------------------------|
|                                           | RADS has a better target yield than PI-RADS_Rads alone                                                                                                                                                                                                                                                                                                                                                                                                                                                                                                                                                                                                                                                                             |
| Test procedures                           | Subjects will be randomized to either<br><b>ARM A:</b> multi-parametric magnetic resonance imaging (MRI) which, depending on outcome, may be followed by (MRI)-targeted biopsy.<br><b>ARM B:</b> systematic trans-rectal ultrasound (TRUS) guided biopsy.<br>Subjects in both arms will complete a number of different questionnaires and will have PSA measurements taken. If subjects consent to participate in correlative studies, they will also need to provide blood, urine, semen and tissue samples at pre-specified time points.                                                                                                                                                                                         |
| Indication                                | Clinical suspicion of prostate cancer, based on PSA or results of digital rectal exam, with no prior biopsy.                                                                                                                                                                                                                                                                                                                                                                                                                                                                                                                                                                                                                       |
| Diagnosis and main criteria for inclusion | In order to be eligible, <u>all</u> inclusion criteria must be met.<br>16. Men at least 18 years of age referred with clinical suspicion of prostate cancer who have been advised to have a prostate biopsy;<br>17. $\geq 5\%$ chance of high-grade prostate cancer as calculated using individualized risk assessment of prostate cancer calculator, PCPTRC 2.0, found at <a href="http://deb.uthscsa.edu/URORiskCalc/Pages/calcs.jsp">http://deb.uthscsa.edu/URORiskCalc/Pages/calcs.jsp</a> ; For men under age 55, the default age of 55 should be entered on the risk calculator.<br>18. Serum PSA $\leq 20$ ng/ml;<br>19. Fit to undergo all procedures listed in protocol;<br>20. Able to provide written informed consent. |
| Exclusion Criteria                        | Men who meet the following criteria at the time of screening will be excluded:<br>19. Prior prostate biopsy;<br>20. Prior treatment for prostate cancer;<br>21. Contraindication to MRI (e.g. claustrophobia, pacemaker, estimated GFR $\leq 50$ mls/min);<br>22. Contraindication to prostate biopsy;<br>23. Men in whom artifact would reduce the quality of the MRI; i.e, previous hip replacement surgery, metallic hip replacement or extensive pelvic orthopaedic metal work;<br>24. Unfit to undergo any procedures listed in protocol.                                                                                                                                                                                     |
| Study Design                              | This is a multi-centre open-label, randomized two arm study. Men are either randomized to receive MRI or a systematic trans-rectal ultrasound (TRUS) guided biopsy.                                                                                                                                                                                                                                                                                                                                                                                                                                                                                                                                                                |
| Methodology                               | Eligible subjects will be randomized in a 1:1 ratio to receive either (ARM A) multi-parametric magnetic resonance imaging (MRI) which, depending on outcome, may be followed by (MRI)-targeted biopsy, or (ARM B) systematic trans-rectal ultrasound (TRUS) guided biopsy. The time frame for data collection is shown in Appendix 1.<br><u>All subjects</u> will have a PSA test prior to, or at Visit 1, and will                                                                                                                                                                                                                                                                                                                |

|                               |                                                                                                                                                                                                                                                                                                                                                                                                                                                                                                                                                                                                                                                                                                                                                                                                                                                                                                                                                                                                                                                                                                                                                                                                                                                                                                                                                                                                                                                                                                                                                                                                                                                                                                                                               |
|-------------------------------|-----------------------------------------------------------------------------------------------------------------------------------------------------------------------------------------------------------------------------------------------------------------------------------------------------------------------------------------------------------------------------------------------------------------------------------------------------------------------------------------------------------------------------------------------------------------------------------------------------------------------------------------------------------------------------------------------------------------------------------------------------------------------------------------------------------------------------------------------------------------------------------------------------------------------------------------------------------------------------------------------------------------------------------------------------------------------------------------------------------------------------------------------------------------------------------------------------------------------------------------------------------------------------------------------------------------------------------------------------------------------------------------------------------------------------------------------------------------------------------------------------------------------------------------------------------------------------------------------------------------------------------------------------------------------------------------------------------------------------------------------|
|                               | <p>complete a baseline EQ-5D-5L questionnaire. In addition, they will contribute optional blood, urine, semen and tissue samples if they consent to correlative studies.</p> <p><u>All subjects in ARM A</u> will complete an EQ-5D-5L questionnaire and an immediate post-MRI/TRUS Fusion Biopsy questionnaire following the MRI.</p> <p><u>Subjects in ARM A who do not receive a subsequent biopsy</u> will complete an EQ-5D-5L questionnaire when they find out the results of the MRI 3 weeks (<math>\pm</math> 1 week) after the procedure. They will have another MRI and PSA test 2 years after the initial MRI. When they complete the study after 2 years of follow up, they will complete another EQ-5D-5L questionnaire.</p> <p><u>Subjects in ARM A who do receive a MRI-targeted biopsy</u> will complete an immediate post-biopsy questionnaire at the time of the biopsy, another EQ-5D-5L questionnaire and a 30-day post biopsy questionnaire when they find out the results of the biopsy, 3 weeks (<math>\pm</math> 1 week) after the procedure. They will have an additional PSA test every 6 months for two years, and at the end of 2 years of follow up, they will complete another EQ-5D-5L questionnaire.</p> <p><u>All subjects in ARM B</u> will complete an immediate post-biopsy questionnaire following the standardized TRUS-guided biopsy. They will complete another EQ-5D-5L questionnaire and a 30-day post biopsy questionnaire when they find out the results of the biopsy, 3 weeks (<math>\pm</math> 1 week) after the procedure. They will have an additional PSA test every 6 months for two years, and at the end of 2 years of follow up, they will complete another EQ-5D-5L questionnaire.</p> |
| Type of control               | This is an open-label randomized study.                                                                                                                                                                                                                                                                                                                                                                                                                                                                                                                                                                                                                                                                                                                                                                                                                                                                                                                                                                                                                                                                                                                                                                                                                                                                                                                                                                                                                                                                                                                                                                                                                                                                                                       |
| Number of subjects            | This study requires 422 subjects (211 in each arm). To account for potential withdrawal / loss to follow up and the effect of stratification, the sample size will be inflated by 5%, and a target of <b>450 men</b> will be recruited.                                                                                                                                                                                                                                                                                                                                                                                                                                                                                                                                                                                                                                                                                                                                                                                                                                                                                                                                                                                                                                                                                                                                                                                                                                                                                                                                                                                                                                                                                                       |
| Primary endpoint              | The proportion of men in each arm with clinically significant cancer (Gleason $\geq$ 7) will be calculated based on histology results from biopsy procedures. Analysis will be on the per protocol study population.                                                                                                                                                                                                                                                                                                                                                                                                                                                                                                                                                                                                                                                                                                                                                                                                                                                                                                                                                                                                                                                                                                                                                                                                                                                                                                                                                                                                                                                                                                                          |
| Secondary endpoints           | See section 7.4                                                                                                                                                                                                                                                                                                                                                                                                                                                                                                                                                                                                                                                                                                                                                                                                                                                                                                                                                                                                                                                                                                                                                                                                                                                                                                                                                                                                                                                                                                                                                                                                                                                                                                                               |
| Plan for statistical analysis | See section 14.0.                                                                                                                                                                                                                                                                                                                                                                                                                                                                                                                                                                                                                                                                                                                                                                                                                                                                                                                                                                                                                                                                                                                                                                                                                                                                                                                                                                                                                                                                                                                                                                                                                                                                                                                             |
| Funding                       | The total budget for this trial is \$3,000,000. (see attached).Ontario Institute for Cancer Research (OICR) has committed to \$1,500,000 in support of this study (letter appended).We hope to obtain the additional \$1,500,000 from the Movember Accelerated Translational Research Grant Competition                                                                                                                                                                                                                                                                                                                                                                                                                                                                                                                                                                                                                                                                                                                                                                                                                                                                                                                                                                                                                                                                                                                                                                                                                                                                                                                                                                                                                                       |

9031  
9032

---

|      |                                                                                          |           |
|------|------------------------------------------------------------------------------------------|-----------|
| 9033 | <b>Table of Contents</b>                                                                 |           |
| 9034 | <b>1. TITLE PAGE</b> .....                                                               | <b>1</b>  |
| 9035 | <b>2. SIGNATURE OF INVESTIGATORS</b> .....                                               | <b>11</b> |
| 9036 | <b>3. SYNOPSIS</b> .....                                                                 | <b>12</b> |
| 9037 | <b>4. ABBREVIATIONS AND DEFINITIONS</b> .....                                            | <b>18</b> |
| 9038 | <b>5. TRIAL SUMMARY</b> .....                                                            | <b>19</b> |
| 9039 | 5.1 AIM AND RATIONALE .....                                                              | 19        |
| 9040 | 5.2 METHODS .....                                                                        | 191       |
| 9041 | 5.3 PARTICIPATING SITES.....                                                             | 21        |
| 9042 | 5.4 STUDY OUTCOMES .....                                                                 | 21        |
| 9043 | 5.4.1 <i>Primary outcome</i> .....                                                       | 21        |
| 9044 | 5.4.2 <i>Secondary outcomes</i> .....                                                    | 21        |
| 9045 | <b>6. BACKGROUND</b> .....                                                               | <b>22</b> |
| 9046 | 6.1 PROSTATE CANCER DIAGNOSIS .....                                                      | 22        |
| 9047 | 6.2 CLINICALLY SIGNIFICANT VERSUS CLINICALLY INSIGNIFICANT PROSTATE CANCER.....          | 22        |
| 9048 | 6.3 CURRENT STANDARD OF CARE: SYSTEMATIC TRUS GUIDED BIOPSY .....                        | 23        |
| 9049 | 6.4 THE EMERGING ROLE OF MRI IN PROSTATE CANCER DIAGNOSIS AND TREATMENT .....            | 23        |
| 9050 | 6.4.1 <i>The role of imaging in prostate cancer diagnosis</i> .....                      | 23        |
| 9051 | 6.4.2 <i>Limitations of early MRI studies in prostate cancer</i> .....                   | 23        |
| 9052 | 6.4.3 <i>Emerging role of MRI in the diagnosis of prostate cancer</i> .....              | 24        |
| 9053 | 6.4.4 <i>Prostate cancer detection rates of MRI-targeted biopsy are similar to other</i> |           |
| 9054 | <i>methods</i> .....                                                                     | 26        |
| 9055 | 6.4.5 <i>Limitations of studies reporting MPMRI-targeted prostate biopsy</i> .....       | 26        |
| 9056 | 6.5 NOVELTY OF PRECISE .....                                                             | 27        |
| 9057 | <b>7. TRIAL OBJECTIVES</b> .....                                                         | <b>27</b> |
| 9058 | 7.1 OVERALL AIM .....                                                                    | 27        |
| 9059 | 7.2 HYPOTHESES .....                                                                     | 27        |
| 9060 | 7.3 PRIMARY OBJECTIVE.....                                                               | 27        |
| 9061 | 7.4 SECONDARY OBJECTIVES .....                                                           | 28        |
| 9062 | 7.5 EXPLANATION FOR NON-INFERIORITY HYPOTHESIS .....                                     | 28        |
| 9063 | 7.6 ANTICIPATED TIMELINE OF STUDY PROGRESSION .....                                      | 28        |
| 9064 | <b>8. STUDY POPULATION</b> .....                                                         | <b>29</b> |
| 9065 | 8.1 NUMBER OF SUBJECTS .....                                                             | 29        |
| 9066 | 8.2 SUBJECT INCLUSION CRITERIA .....                                                     | 29        |
| 9067 | 8.3 SUBJECT EXCLUSION CRITERIA.....                                                      | 29        |
| 9068 | <b>9. STUDY DESIGN</b> .....                                                             | <b>30</b> |
| 9069 | 9.1 STUDY DESIGN .....                                                                   | 30        |
| 9070 | 9.2 STUDY TRIAL SCHEMA.....                                                              | 31        |
| 9071 | 9.3 TIMELINE OF SUBJECT CONTACT .....                                                    | 32        |
| 9072 | <b>10. TRIAL INTERVENTIONS AND PROCEDURES</b> .....                                      | <b>36</b> |
| 9073 | 10.1 EQ-5D-5L QUESTIONNAIRES.....                                                        | 36        |
| 9074 | 10.2 MULTIPARAMETRIC MRI IMAGING PROCEDURE .....                                         | 36        |
| 9075 | 10.2.1 <i>MRI Protocol</i> .....                                                         | 36        |
| 9076 | 10.2.2 <i>MRI reporting</i> .....                                                        | 37        |
| 9077 | 10.3 NO TARGET IDENTIFIED ON MPMRI (PIRADS 1 OR 2).....                                  | 38        |
| 9078 | 10.4 MRI-TARGETED BIOPSY .....                                                           | 38        |
| 9079 | 10.4.1 <i>MRI choice of targets for targeted biopsy</i> .....                            | 38        |

|      |                                                                                      |           |
|------|--------------------------------------------------------------------------------------|-----------|
| 9080 | 10.4.2 MRI Biopsy .....                                                              | 39        |
| 9081 | 10.5 SYSTEMATIC TRUS GUIDED BIOPSY .....                                             | 402       |
| 9082 | 10.6 PATHOLOGY .....                                                                 | 40        |
| 9083 | 10.7 POST-PROCEDURAL CARE .....                                                      | 40        |
| 9084 | 10.8 IMMEDIATE POST-BIOPSY QUESTIONNAIRE .....                                       | 40        |
| 9085 | 10.9 30-DAY POST-BIOPSY QUESTIONNAIRE.....                                           | 41        |
| 9086 | 10.10 RESULTS AND TREATMENT DECISION (VISIT 4).....                                  | 41        |
| 9087 | 10.11 FOLLOW UP PERIOD.....                                                          | 42        |
| 9088 | 10.12 ADDITIONAL TESTS FOR BIOMARKER DISCOVERY - OPTIONAL .....                      | 43        |
| 9089 | 10.12.1 Samples to be collected for future biomarker discovery work (Optional) ..... | 43        |
| 9090 | 10.13 LONG-TERM DATA LINKAGE – PERMISSION TO CONTACT .....                           | 43        |
| 9091 | 10.14 END OF STUDY .....                                                             | 44        |
| 9092 | 10.15 RISKS AND BENEFITS TO PARTICIPANTS .....                                       | 44        |
| 9093 | 10.15.1 Risks to subjects.....                                                       | 44        |
| 9094 | 10.15.2 Benefits to subjects.....                                                    | 46        |
| 9095 | 10.16 CONCOMITANT MEDICATIONS .....                                                  | 46        |
| 9096 | 10.16.1 Permitted Medications .....                                                  | 46        |
| 9097 | 10.16.2 Non-Drug Therapies.....                                                      | 46        |
| 9098 | <b>11. SCHEDULE OF STUDY VISITS .....</b>                                            | <b>47</b> |
| 9099 | 11.1 VISIT 1 (SCREENING/RANDOMIZATION): SCREENING, CONSENT, RANDOMIZATION.....       | 47        |
| 9100 | 11.2 VISIT 2 (MRI): ARM A, FOR MEN RANDOMIZED TO MRI .....                           | 47        |
| 9101 | 11.3 VISIT 3 (BIOPSY): ARM A, MRI-TARGETED BIOPSY OF PROSTATE .....                  | 47        |
| 9102 | 11.4 VISIT 3 (BIOPSY): ARM B, FOR MEN RANDOMIZED TO A SYSTEMATIC TRUS-BIOPSY .....   | 48        |
| 9103 | 11.5 VISIT 4 (POST-TEST FOLLOW UP): ARM A, FOR MEN WHO DID NOT RECEIVE A BIOPSY..... | 49        |
| 9104 | 11.6 VISIT 4 (POST-TEST FOLLOW UP): FOR ALL MEN WHO RECEIVED A BIOPSY .....          | 49        |
| 9105 | 11.7 VISIT 5 ( 6 MONTH FOLLOW UP):.....                                              | 40        |
| 9106 | 11.8 VISIT 6 (1 YEAR FOLLOW UP): 52 WEEK FOLLOW UP .....                             | 49        |
| 9107 | 11.9 VISIT 7 (18 MONTH FOLLOW UP):.....                                              | 41        |
| 9108 | 11.8 VISIT 8 (2 YEAR FOLLOW UP): END OF STUDY.....                                   | 50        |
| 9109 | <b>12. RANDOMIZATION .....</b>                                                       | <b>50</b> |
| 9110 | 12.1 REGISTRATION AND RANDOMIZATION PROCEDURE.....                                   | 50        |
| 9111 | 12.2 STRATIFICATION.....                                                             | 51        |
| 9112 | 12.3 BLINDING AND MEASURES TAKEN TO AVOID BIAS .....                                 | 51        |
| 9113 | <b>13. DATA.....</b>                                                                 | <b>51</b> |
| 9114 | <b>14. STATISTICAL CONSIDERATIONS .....</b>                                          | <b>52</b> |
| 9115 | 14.1 SAMPLE SIZE CALCULATION .....                                                   | 52        |
| 9116 | 14.2 INTERIM ANALYSIS .....                                                          | 46        |
| 9117 | 14.3 POPULATIONS: .....                                                              | 55        |
| 9118 | 14.4 PRIMARY OUTCOME.....                                                            | 55        |
| 9119 | 14.5 SECONDARY OUTCOMES .....                                                        | 55        |
| 9120 | <b>15. PARTICIPANT COMPLIANCE AND WITHDRAWAL .....</b>                               | <b>59</b> |
| 9121 | 15.1 SUBJECT WITHDRAWAL FROM STUDY.....                                              | 59        |
| 9122 | 15.2 STUDY COMPLETION .....                                                          | 60        |
| 9123 | <b>16. DATA MONITORING, QUALITY CONTROL AND SAFETY.....</b>                          | <b>60</b> |
| 9124 | 16.1 STOPPING / DISCONTINUATION RULES .....                                          | 60        |
| 9125 | 16.2 MONITORING, QUALITY CONTROL AND ASSURANCE .....                                 | 61        |
| 9126 | 16.3 ASSESSMENT OF SAFETY .....                                                      | 61        |
| 9127 | 16.3.1 Definition of an Adverse Event (AE) .....                                     | 61        |
| 9128 | 16.3.2 Definition of a Serious Adverse Event (SAE).....                              | 61        |
| 9129 | 16.3.3 Disease-Related Events or Outcomes Not Qualifying as SAEs.....                | 62        |

|      |                                                                                           |           |
|------|-------------------------------------------------------------------------------------------|-----------|
| 9130 | <i>16.3.4 Lack of Efficacy</i> .....                                                      | 62        |
| 9131 | <i>16.3.5 Clinical Laboratory Abnormalities and Other Abnormal Assessments as AEs and</i> |           |
| 9132 | <i>SAEs</i> .....                                                                         | 62        |
| 9133 | <i>16.3.6 Recording/Reporting AEs and SAEs</i> .....                                      | 63        |
| 9134 | <i>16.3.7 Evaluating AEs and SAEs</i> .....                                               | 64        |
| 9135 | <i>16.3.8 Follow-up of AEs and SAEs</i> .....                                             | 65        |
| 9136 | <i>16.3.9 Prompt Reporting of SAEs</i> .....                                              | 65        |
| 9137 | <i>16.3.10 Post-study AEs and SAEs</i> .....                                              | 66        |
| 9138 | <b>17. STUDY ADMINISTRATION</b> .....                                                     | <b>66</b> |
| 9139 | 17.1 REGULATORY AND ETHICAL CONSIDERATIONS.....                                           | 66        |
| 9140 | 17.1.1 <i>Ethical Conduct of the Study and Ethics Approval</i> .....                      | 66        |
| 9141 | 17.1.2 <i>Informed Consent</i> .....                                                      | 67        |
| 9142 | 17.1.3 <i>Investigator Reporting Requirements</i> .....                                   | 67        |
| 9143 | 17.2 STUDY MONITORING .....                                                               | 67        |
| 9144 | 17.3 QUALITY ASSURANCE.....                                                               | 68        |
| 9145 | 17.4 STUDY AND SITE CLOSURE .....                                                         | 68        |
| 9146 | 17.5 RECORDS RETENTION .....                                                              | 69        |
| 9147 | 17.6 DATA MANAGEMENT .....                                                                | 69        |
| 9148 | 17.7 PUBLICATION .....                                                                    | 69        |
| 9149 | <b>18. REFERENCES</b> .....                                                               | <b>71</b> |
| 9150 | <b>APPENDICES</b> .....                                                                   | <b>76</b> |
| 9151 | APPENDIX 1: TIME WINDOWS FOR DATA COLLECTION .....                                        | 76        |
| 9152 | APPENDIX 2: MPMRI REPORTING PROFORMA .....                                                | 81        |
| 9153 | APPENDIX 3: EXAMPLE OF SYSTEMATIC TRUS GUIDED BIOPSYSCHEMA.....                           | 83        |
| 9154 | APPENDIX 4: 2-PAGE EQ-5D-5L QUESTIONNAIRE .....                                           | 84        |
| 9155 | APPENDIX 5: IMMEDIATE POST BIOPSY QUESTIONNAIRE.....                                      | 83        |
| 9156 | APPENDIX 6: 30-DAY POST BIOPSY QUESTIONNAIRE.....                                         | 86        |
| 9157 |                                                                                           |           |
| 9158 |                                                                                           |           |
| 9159 |                                                                                           |           |
| 9160 |                                                                                           |           |

---

#### 9161 4. Abbreviations and definitions

##### 9162 Abbreviations:

|      |          |                                                     |
|------|----------|-----------------------------------------------------|
| 9163 |          |                                                     |
| 9164 | ADC      | Apparent diffusion coefficient                      |
| 9165 | CI       | Confidence interval                                 |
| 9166 | CRF      | Case report form                                    |
| 9167 | DSMC     | Data Safety and Monitoring Committee                |
| 9168 | DRE      | Digital rectal examination                          |
| 9169 | DWI      | Diffusion weighted imaging                          |
| 9170 | DCE      | Dynamic contrast enhancement                        |
| 9171 | EDC      | Electronic Data Capture                             |
| 9172 | ITT      | Intention to treat                                  |
| 9173 | MCCL     | Maximum cancer core length                          |
| 9174 | MPMRI    | Multi-parametric MRI, used interchangeably with MRI |
| 9175 |          | in this protocol.                                   |
| 9176 | MPMRI-TB | Multi-parametric magnetic resonance image-targeted  |
| 9177 |          | biopsy of the prostate                              |
| 9178 | MRI      | Magnetic resonance imaging, used interchangeably    |
| 9179 |          | with MPMRI in this protocol                         |
| 9180 | MRI-TB   | Magnetic resonance imaging targeted biopsy          |
| 9181 | MRS      | Magnetic resonance spectroscopy                     |
| 9182 | PI       | Principal Investigator                              |
| 9183 | PI-RADS  | Prostate Imaging Reporting and Data System          |
| 9184 | PTC      | Permission to Contact                               |
| 9185 | PSA      | Prostate specific antigen                           |
| 9186 | REB      | Research Ethics Board                               |
| 9187 | STARD    | Standards for the reporting of diagnostic studies   |
| 9188 | TRUS     | Trans-rectal ultrasound                             |
| 9189 | TSC      | Trial Steering Committee                            |
| 9190 | T2W      | T2-weighted imaging                                 |

9191

9192

##### 9193 Definitions:

9194

|      |                               |                                                |
|------|-------------------------------|------------------------------------------------|
| 9195 | MPMRI-targeted biopsy         | A biopsy technique where an MPMRI scan is      |
| 9196 |                               | used to determine the location of a suspicious |
| 9197 |                               | target prior to biopsy.                        |
| 9198 |                               |                                                |
| 9199 | Systematic TRUS guided biopsy | A biopsy approach where conduct of procedure   |
| 9200 |                               | is not influenced by findings on MRI imaging.  |
| 9201 |                               | Currently this is the standard of care for     |
| 9202 |                               | prostate cancer in the province of Ontario.    |

9203

9204

9205

9206  
9207

---

## 5. Trial summary

### 5.1 Aim and Rationale

9209

9210 The standard pathway for prostate cancer diagnosis is trans-rectal ultrasound guided  
9211 (TRUS) biopsy of the prostate following an elevated PSA. TRUS guidance is  
9212 performed primarily for anatomic guidance as the ultrasound poorly discriminates  
9213 between cancerous and non-cancerous tissue. TRUS guided prostate biopsies are  
9214 concentrated in areas of the peripheral zone, thought to harbor the majority of  
9215 cancer.

9216

9217 An alternative pathway for prostate cancer diagnosis in men with elevated PSA is to  
9218 perform multi-parametric magnetic resonance imaging (MPMRI) to localize cancer.  
9219 This information is used to direct a subsequent biopsy, known as an MRI-targeted  
9220 biopsy. MRI-targeted biopsy has been shown in preliminary studies to detect a  
9221 similar or greater amount of clinically significant cancer than systematic TRUS guided  
9222 biopsy and has several other potential advantages including: the ability to  
9223 differentiate between clinically significant and insignificant cancer, reducing  
9224 unnecessary biopsy and fewer numbers of biopsy cores, reducing biopsy-related  
9225 side-effects.

9226

9227 A 'clinically insignificant cancer' is cancer that is unlikely to progress or to affect an  
9228 individual's life expectancy and therefore does not warrant treatment. However  
9229 when diagnosed with low grade cancer that is likely to be insignificant, a large  
9230 proportion of subjects request treatment in case a more significant cancer is  
9231 present[1]. A challenge in this area is that subjects are typically not aware that their  
9232 cancer is clinically insignificant, and often view the early diagnosis and aggressive  
9233 treatment they have been subjected to as life-saving.

9234 A prostate cancer detection procedure that differentiates clinically significant cancer  
9235 from clinically insignificant cancer is therefore a major unmet need.

9236

9237 The potential implications of this trial include:

9238

9239

9240

9241

9242

9243

9244

9245

9246

9247

9248

- A redefinition of the prostate cancer diagnostic pathway;
- A reduction in the number of subjects undergoing prostate biopsy;
- A reduction in the number of biopsy cores taken per subject;
- A reduction in biopsy-related adverse events including sepsis and pain;
- A reduction in the over-diagnosis of clinically insignificant prostate cancer;
- A reduction in the economic burden of diagnosing and treating prostate cancer.



---

9249 **5.2 Methods**

9250

9251 Men referred with clinical suspicion of prostate cancer who have had no prior biopsy  
9252 are randomized to either systematic TRUS guided biopsy(standard of care) or to a  
9253 multi-parametric MRI (MPMRI) arm (the investigational arm). In the MRI arm, areas  
9254 of the prostate are scored on a 5-point scale of suspicion for clinically significant  
9255 cancer based on the Prostate Imaging Reporting and Data System

9256 (PI-RADS) v2[2]:

9257 PI-RADS 1 – Very low (clinically significant cancer is highly unlikely to be  
9258 present)

9259 PI-RADS 2 – Low (clinically significant cancer is unlikely to be present)

9260 PI-RADS 3 – Intermediate (the presence of clinically significant cancer is  
9261 equivocal)

9262 PI-RADS 4 – High (clinically significant cancer is likely to be present)

9263 PI-RADS 5 – Very high (clinically significant cancer is highly likely to be  
9264 present)

9265

9266 Each suspicious area will be given a separate score as described by consensus  
9267 meeting recommendations [2, 3]. Lesions scoring 3, 4 or 5 will undergo targeted  
9268 biopsy; up to three suspicious areas will be targeted.

9269

9270 In the control arm, subjects will undergo a standard 12 core systematic TRUS guided  
9271 biopsy as per standard recommendations[4]. Suspicious sonographic lesions will be  
9272 targeted (12 cores *in toto*).

9273

9274 Pathologic findings from all biopsies will be recorded and will undergo statistical  
9275 analysis (see statistics section, 14.0).

9276

9277 In both arms, self-reported questionnaires to capture biopsy-specific side effects will  
9278 be administered immediately post-procedure, and at the post-procedure  
9279 appointment which will take place 3 weeks ( $\pm$  1 week) after the procedure. Euro QOL  
9280 group 5 domain EQ-5D-5L questionnaires or a comparable QOL instrument will also  
9281 be completed at baseline (prior to MRI or TRUS biopsy), 24 hours post MRI and 24  
9282 hours post-biopsy. Men will be followed up for 30-days post intervention and until a  
9283 treatment decision is made and recorded. Pathology results from men requiring a  
9284 radical prostatectomy will be recorded.

9285

9286 Men will complete the trial after they complete treatment for prostate cancer  
9287 (radical prostatectomy) or the required follow-up procedures for each arm are met  
9288 (see study timelines, section 9.3). Once men complete the trial, they revert to  
9289 standard of care.

9290

9291 Annual questionnaires will be administered for all men with negative biopsy in both  
9292 arms during a two-year follow-up period to determine cancer and treatment status.

9293

---

9294 No diagnostic test is perfect, and even with the best test some cancers may be  
9295 missed. To minimize the risk of false negatives, men with negative biopsy results will  
9296 be followed with serial PSA testing; PSA levels will increase if cancer is present.  
9297 In both arms in addition to serial PSA testing all men who have no cancer found at  
9298 systematic biopsy or targeted biopsy, have a negative MRI or enter active  
9299 surveillance will have a followup MRI at 24. If a new Pi-Rads  $\geq 3$  lesion is found on  
9300 the followup MRI or there is progression of an existing lesion this lesion will undergo  
9301 targeted biopsy as part of standard of care.

9302  
9303 As recruitment is expected to take up to 24 months (see section 7.6) and each  
9304 subject will be followed up for two years, the estimated maximal duration of this  
9305 study is four years in total. The primary endpoint will be reached at approximately 2  
9306 years after study initiation.

### 9307 **5.3 Participating Sites**

9308 This is a multi-centre study. Institutions participating in the study must be able to  
9309 perform both the systematic TRUS guided biopsy and the MRI-TB. They must be able  
9310 to randomize men to one of these two diagnostic tests.

9311  
9312 We expect to recruit 3-6 subjects per month per site, based on recruitment rates  
9313 from previous diagnostic trials performed by the centers involved. A typical centre  
9314 sees 15-30 eligible men per month. We expect 5 recruitment sites, with 100 men to  
9315 be recruited at each site over an 18-24 month period (see section 7.6).

### 9316 **5.4 Study outcomes**

#### 9317 **5.4.1 Primary outcome**

9318 To determine whether the proportion of men with clinically significant cancer  
9319 (Gleason  $\geq 7$ ) detected by MRI-targeted biopsy is no less than systematic TRUS  
9320 guided biopsy.

#### 9321 **5.4.2 Secondary outcomes**

- 9322 40. To determine whether the proportion of men with clinically significant cancer  
9323 (Gleason  $\geq 7$ ) detected by MRI-targeted biopsy is greater than systematic TRUS  
9324 guided biopsy.
- 9325 41. Proportion of men in each arm with clinically insignificant cancer detected.
- 9326 42. Proportion of men in each arm with Gleason  $\geq 4+3$  detected.
- 9327 43. Proportion of men in MRI arm who avoid biopsy.
- 9328 44. Proportion of men in the MRI arm whom the PI-RADS score for suspicion of  
9329 clinically significant cancer was 3, 4 or 5 but no clinically significant cancer was  
9330 detected.
- 9331 45. Proportion of men in each arm who go on to definitive local treatment (e.g.  
9332 radical prostatectomy, radiotherapy, brachytherapy) or systemic treatment (e.g.  
9333 hormone therapy, chemotherapy).
- 9334 46. Proportion of men in each arm who do not have significant cancer found at  
9335 baseline who develop a positive MRI and/or have a progressive lesion found on  
9336 MRI and/or have Gleason  $\geq 7$  cancer detected on a repeat biopsy (systematic or

- 
- 9337 targeted) by 2 years.
- 9338 47. Proportion of men with post-biopsy adverse events
- 9339 48. Health-related quality of life scores.
- 9340 49. Proportion with Gleason grade upgrading in men undergoing radical
- 9341 prostatectomy.
- 9342 50. To determine the cost per diagnosis of cancer.
- 9343 51. To determine the impact of the addition of Gd based contrast compared to a non
- 9344 contrast abbreviated MRI protocol on target yield
- 9345 52. To determine if a radiologist Likert score not based on PI-RADS has a better
- 9346 target yield than PI-RADS alone
- 9347
- 9348

## 9349 **6. Background**

### 9350 **6.1 Prostate cancer diagnosis**

9351 Prostate cancer is the most common male cancer in the Western world with an

9352 incidence of 24,000 new cases in Canada and 233,000 in the USA[5, 6]. It is the

9353 second most common cause of cancer death in European and North American men,

9354 with 2,900 deaths per year in Canada and 90,000 deaths per year in Europe[5, 6].

9355 The incidence of the disease has increased by 22% over the last decade due to the

9356 widespread use of the prostate specific antigen (PSA) blood test; by 2030 the

9357 Canadian Cancer Society estimates the incidence of prostate cancer will be 42,225.As

9358 prostate cancer is a histopathological diagnosis, men with raised PSA or abnormal

9359 digital rectal examination (DRE) are usually referred for a prostate biopsy. Over one

9360 million prostate biopsies are performed in North America and Europe every year[7].

9361

### 9362 **6.2 Clinically significant versus clinically insignificant prostate cancer**

9363

9364 Clinically significant prostate cancer is cancer that is likely to progress and affect a

9365 man's life expectancy if left untreated. Though there is no universally agreed upon

9366 definition on what histological parameters define clinically significant cancer, most

9367 agree that larger volume cancers with a higher Gleason grade are more likely to be

9368 clinically significant; an historically accepted threshold is a tumour volume above

9369 0.5milliliters or any Gleason pattern 4 or 5 cancer[8-11].

9370

9371 This definition is likely overly stringent. An increasing consensus views all Gleason

9372 pattern 3 (Gleason score 6) cancers and many Gleason3 plus small amounts of

9373 pattern 4 cancers as likely insignificant[12]. About half of newly diagnosed prostate

9374 cancers fall into this category, and are unlikely to progress and affect a man's life

9375 expectancy if left untreated. The widespread use of PSA testing has led to more men

9376 being diagnosed with insignificant cancer that does not warrant any treatment [13];

9377 however they are typically monitored closely with active surveillance. This is

9378 associated with anxiety about harbouring untreated cancer, and the negative

9379 psychological effects of being a 'survivor' [14]. Men diagnosed with low risk prostate

9380 cancer are also subjected to serial biopsies and other tests, requiring long term

9381 follow up. Further, many men with low risk disease receive radical treatment, either

---

9382 because their physicians are not advocates of surveillance or because of anxiety  
9383 [15].These treatments may expose them to morbidity including urinary incontinence  
9384 and erectile dysfunction [16]. Thus, diagnostic tests that clearly differentiate  
9385 clinically significant cancer from clinically insignificant cancer will help reduce patient  
9386 anxiety, alleviate further testing, and avoid radical treatment and associated  
9387 morbidities.  
9388

### 9389 **6.3 Current standard of care: systematic TRUS guided biopsy**

9390 The European association of Urology and NICE guidelines recommend systematic  
9391 TRUS guided biopsy as the current standard of care for the diagnosis of prostate  
9392 cancer [4, 17].This procedure has several advantages: it can be delivered quickly in  
9393 an outpatient clinic under local anesthetic, it can be offered at most Urology centres,  
9394 and the expertise is widely distributed.  
9395

9396 Limitations of systematic TRUS guided biopsy are as follows: the procedure requires  
9397 the operator to take 10-12 samples in the peripheral zone, where it is thought that  
9398 the majority of prostate cancer can be found (See Appendix 2)[18]. The ultrasound  
9399 guidance used during the procedure is useful for visualizing the prostate and  
9400 assessing the location of the needle within the prostate but has a poor ability to  
9401 discriminate tumour from normal tissue [19], which means that the systematic TRUS  
9402 guided biopsy can potentially miss some cancer. Systematic TRUS guided biopsy has  
9403 been shown to have a high false negative rate of 30-45% [20, 21].As a systematic  
9404 TRUS guided biopsy is not specifically targeted to the location of a suspected  
9405 significant cancer, there is also a greater chance that a significant cancer may be  
9406 missed.

### 9407 **6.4 The emerging role of MRI in prostate cancer diagnosis and** 9408 **treatment**

#### 9409 **6.4.1 The role of imaging in prostate cancer diagnosis**

9410 Although used to diagnose many other solid organ cancers such as breast, renal and  
9411 colorectal cancer, imaging is not part of the traditional prostate cancer diagnostic  
9412 pathway. Imaging in prostate cancer, is typically limited to stage the disease  
9413 following histological diagnosis. Magnetic resonance imaging (MRI) is used in many  
9414 centres to assess for extra-capsular extension during prostate cancer staging. In the  
9415 past five years however, the possibility of using multi-parametric MRI (MPMRI)for  
9416 diagnosing prostate cancer prior to biopsy, has generated tremendous interest[22].

#### 9417 **6.4.2 Limitations of early MRI studies in prostate cancer**

9418 Early literature reported conflicting results on the ability of MRI to detect prostate  
9419 cancer. A recent systematic review of the literature showed that the quality of  
9420 studies evaluating MRI was disappointing [22]. Limitations of reported studies  
9421 include:

- 9422 • **Poor reporting standards.** Many early studies failed to closely follow  
9423 published guidelines for the standards of reporting of diagnostic studies  
9424 (STARD) [23].

- 
- 9425
- 9426
- 9427
- 9428
- 9429
- 9430
- 9431
- 9432
- 9433
- 9434
- 9435
- 9436
- 9437
- 9438
- 9439
- 9440
- 9441
- 9442
- 9443
- **Biopsy artifact.** The majority of early studies evaluated MRI after biopsy. Evidence has shown that post-biopsy hemorrhage can remain for several months and affect interpretation of the image [24].
  - **Poor reference standards.** Many early studies use systematic TRUS guided biopsy as a reference standard, which due to its limitations, can influence the validity of the index test of MRI. Using radical prostatectomy specimens as reference standards can lead to a selection bias, as MRI is only validated in men with disease characteristics that require radical prostatectomy. Further, correlation of radical prostatectomy specimen with an MRI image is not without difficulty given the shrinkage (10-20%), distortion, absent perfusion, orientation and tissue loss as a result of specimen trimming.
  - **Incomplete analysis of the prostate.** Many early studies only evaluate the validity of MRI in the peripheral zone, even though studies have shown that around 25% of prostate cancers may be located in the transition zone [18].
  - **Segmentation.** Many early studies artificially divide the prostate into a number of segments in order to increase the amount of data obtained and the power of the analysis. Segments should not be treated as independent regions of interest, and this should be factored into the analysis.

#### 9444 **6.4.3 Emerging role of MRI in the diagnosis of prostate cancer**

9445 Since the publication of these early reports, improvements in diagnostic technology  
9446 have changed the field and more evidence supporting the role of pre-biopsy MRI has  
9447 been published. Magnetic field strength has increased from 0.5 Tesla to 1.5 Tesla  
9448 and 3.0 Tesla. The introduction of shorter pulse sequences allows faster image  
9449 acquisition and the addition of functional sequences including magnetic resonance  
9450 spectroscopy (MRS), diffusion weighted imaging (DWI) and dynamic contrast  
9451 enhanced imaging (DCE). Clinicians are increasingly aware of and are accounting for  
9452 biopsy artifacts.

9453

9454 The combination of anatomical sequences (T2-weighted imaging) and functional  
9455 sequences (MRS and/or DWI and/or DCE) is termed multi-parametric MRI.  
9456 Combining the sequences improves the validity of the test [25, 26].

9457

9458 A systematic review determined that 60% of men with a clinical suspicion of prostate  
9459 cancer will have a suspicious area identified on MRI [27]. In studies correlating MRI  
9460 with radical prostatectomy specimens, MRI demonstrates sensitivity, specificity,  
9461 positive predictive value and negative predictive value of 90%, 88%, 77% and 95%  
9462 respectively for the identification of prostate tumours greater than 0.5ml [28].  
9463 Systematic reviews and meta-analysis of recent studies have demonstrated  
9464 sensitivity and specificity consistently between 70-90% for the detection of clinically  
9465 significant prostate cancer[26, 29-31].

9466

9467 As a result of this accumulating evidence, MRI is increasingly used in clinical practice  
9468 in the diagnostic pathway for prostate cancer. The results of MRI can influence the  
9469 decision to perform a prostate biopsy, as well as the technique and targeting used  
9470 during the biopsy.

---

9471

9472 MRI has tremendous potential to enhance the outcome of men on active  
9473 surveillance. 30% of men diagnosed with low risk prostate cancer (Gleason 6, PSA <  
9474 10) harbor higher-grade disease. This occult high-grade disease “*the wolf in sheep’s*  
9475 *clothing*”, is responsible for the 3-5% of prostate cancer deaths that have been  
9476 reported in long term surveillance series that did not incorporate MRI[32, 33]. The  
9477 early use of MRI in men on surveillance has the potential both to reduce the need  
9478 for confirmatory biopsies, and to identify the *wolf in sheep’s clothing* earlier, prior to  
9479 the development of metastasis.

9480

9481 This was the rationale for the very successful ASIST study, which recently successfully  
9482 completed its accrual. The ASIST study was led by Dr. Klotz (PI), and sponsored *in*  
9483 *toto* by the Ontario Institute of Cancer Research. The project was managed by the  
9484 Canadian Urology Research Consortium (CURC). It randomized 273 men recently  
9485 diagnosed with low risk prostate cancer, on surveillance, between systematic  
9486 confirmatory biopsy and MRI with targeted and systematic biopsy. The primary end  
9487 point, similar to PRECISE, was the proportion of men in each group with Gleason 7 or  
9488 higher prostate cancer. The study had numerous secondary end points and  
9489 correlative science components. We expect to report the initial results by 3Q  
9490 2016. We believe that the success and potential impact of the ASIST trial has created  
9491 strong momentum to proceed with the PRECISE trial, which has even greater  
9492 potential to substantially influence prostate cancer screening and diagnosis.

#### 9493 **6.4.3.1 MRI can influence the decision to perform a prostate biopsy**

9494 With reported negative predictive values of 95% [28, 34,35], MRI can help determine  
9495 whether a prostate biopsy is necessary; if the MRI does not identify a suspicious area  
9496 the biopsy can be avoided. Using MRI, 40-50% of men referred with clinical suspicion  
9497 of prostate cancer might avoid a biopsy [27]. The recent National Institute for Health  
9498 Research (NIHR) Health Technology Assessment (HTA) report [11] acknowledged the  
9499 value of MRI in this context. The NIHR HTA report suggests that using MRI to reduce  
9500 the number of men who undergo biopsy, can be cost effective despite the costs  
9501 associated with MRI[11]. Cost savings for the publically funded health care system  
9502 accrue as a result of reduced number of biopsies and costs of attendant  
9503 complications, and reduced treatment of clinically insignificant cancer.

#### 9504 **6.4.3.2 MRI can influence the biopsy technique**

9505 For men who receive a MRI scan and then go on to biopsy of the prostate, the MRI  
9506 information is used to influence the prostate biopsy technique. This is known as MRI-  
9507 targeted biopsy (MRI-TB) of the prostate, and can be carried out in a number of  
9508 ways.

9509

9510 The biopsy operator can use the MRI images or report to direct biopsies into the  
9511 area of the prostate where the tumour is located. The location of the tumour on the  
9512 MRI (carried out in advance) is registered to the real-time ultrasound images with  
9513 the use of software (software assisted registration or image-fusion) or without the  
9514 use of software (visual registration or cognitive registration), while the prostate is  
9515 visualized in real-time using trans rectal ultrasound. MRI-TB can also be conducted  
9516 directly “in-bore”, where the biopsy is conducted within an MRI scanner where the

---

9517 target identified on MRI during a prior diagnostic scan is biopsied using guidance  
9518 from serial MRI scans during the biopsy procedure, performed in an open magnet.  
9519

9520 For the PRECISE study, the biopsy will be performed using an image fusion-targeting  
9521 device. Two devices have been FDA approved: the Artemis, made by Eigen, and the  
9522 Urostation, made by Koelis. These devices import the MR target into the TRUS  
9523 image, and direct the biopsy needle into the target.

#### 9524 **6.4.4 Prostate cancer detection rates of MRI-targeted biopsy are** 9525 **similar to other methods**

9526 A systematic review determined that 60% of men with a clinical suspicion of prostate  
9527 cancer will have a suspicious area identified on MRI [27]. One study found that a  
9528 prostate biopsy strategy using only MPMRI-targeted cores resulted in the same  
9529 detection rate of clinically significant cancer as 20-sector transperineal biopsies[36].  
9530 Other studies also show that a targeted-alone approach would detect a similar  
9531 amount of clinically significant cancer when compared to a 10-12 core systematic  
9532 TRUS guided biopsy[37]. A targeted-alone approach detects 17% less clinically  
9533 insignificant cancer compared to systematic TRUS guided biopsy[38].  
9534

9535 The detection rates achieved with a targeted-alone biopsy strategy require fewer  
9536 biopsy cores than systematic TRUS guided biopsy. Thus on a per-core analysis,  
9537 targeted biopsy is more efficient than systematic TRUS guided biopsy, with cancer  
9538 detected in 30% of all targeted cores in a pooled analysis of 1252 targeted cores  
9539 compared to 7% of all systematic TRUS guided biopsy cores in a pooled analysis of  
9540 5441 systematic cores [27]. As well, the MRI targeted biopsy provides more material  
9541 for histopathological analysis as the maximum cancer core length obtained from  
9542 targeted biopsies can be greater than that obtained from systematic biopsies[37].  
9543

9544 Robust comparative evidence from randomized controlled trials is needed to  
9545 determine if MRI scans can improve our ability over systematic TRUS guided biopsy  
9546 to diagnose clinically significant cancer and our ability to avoid detecting clinically  
9547 insignificant cancer.  
9548

#### 9549 **6.4.5 Limitations of studies reporting MPMRI-targeted prostate biopsy**

9550 Despite encouraging results of MRI-targeted biopsy, it is not yet part of routine  
9551 clinical practice for prostate cancer diagnosis. Most existing studies have cohort  
9552 study designs which make interpretation difficult as they do not conform well to  
9553 STARD [23] recommendations [27]. Limitations of these studies include:

- 9554 • **Broad definition of the study population.** The cancer detection rates depend on  
9555 the prevalence of the condition in the population being investigated. This varies  
9556 amongst men with no prior biopsy, prior negative biopsy and prior positive  
9557 biopsy. In many studies the detection rates are not attributable to a clearly  
9558 defined population.
- 9559 • **MRI conduct and reporting.** The detail in which MRI is conducted and  
9560 interpreted varies greatly amongst published studies.

---

9561 • **Reporting of cancer detection.** The cancer detection by systematic and targeted  
9562 cores is not always presented separately and cancer detection is not always  
9563 specified by clinical significance. These are both essential in order to evaluate the  
9564 technique.  
9565 There is a strong need for a randomized controlled trial comparing MRI-targeted  
9566 biopsy to systematic TRUS guided biopsy so that the role of this technique in clinical  
9567 practice can be established.

## 9568 **6.5 Novelty of PRECISE**

9569 PRECISE is the first randomized study in biopsy-naïve men in which men are  
9570 randomized to an MRI targeted-alone biopsy arm (i.e. no biopsies of MR-normal  
9571 areas of prostate and no biopsy at all if the MR is non-suspicious) or a systematic  
9572 TRUS guided biopsy arm. This will allow evaluation of the efficacy of the MRI-  
9573 targeted biopsy approach in the detection of clinically significant cancer. In order to  
9574 evaluate a biopsy technique that could replace standard of care, the standard of care  
9575 test, i.e. systematic TRUS guided biopsy, must be included in one of the arms to  
9576 allow a direct comparison.

9577  
9578 Other constituencies with an interest in MRI in prostate cancer (University College,  
9579 London; Lille, France; Oslo, Norway; Heidelberg, Germany; New York University, New  
9580 York) have considered similar studies, however in these centres MRI has largely  
9581 replaced systematic TRUS guided biopsy, notwithstanding the lack of evidence to  
9582 date. As a result, these centres have acknowledged that randomization to a standard  
9583 biopsy arm (ie systematic TRUS guided biopsy) would no longer be feasible as  
9584 equipoise has been lost.

9585  
9586 In Ontario, and in almost all other Canadian provinces, prostate MPMRI is not  
9587 recommended for the indication of an elevated PSA in men who have not had a  
9588 biopsy. In this country, men at risk for prostate cancer, in almost all cases, proceed  
9589 to a TRUS guided systematic biopsy. We believe that the opportunity to avoid a  
9590 biopsy will make entry into this trial very appealing to potential candidates. Further,  
9591 the barriers, both financial and physical, to obtaining a quality MRI outside of the  
9592 health care system are substantial. Thus we believe men who are randomized to the  
9593 systemic biopsy arm will in almost all cases proceed with biopsy avoiding significant  
9594 contamination (i.e. men randomized to the systematic biopsy arm seeking out an  
9595 MRI instead).

## 9596 **7. Trial objectives**

### 9598 **7.1 Overall aim**

9599 The aim of this study is to assess the efficacy of MRI-targeted biopsy compared to  
9600 standard of care systematic TRUS guided biopsy in the detection of clinically  
9601 significant and clinically insignificant prostate cancer in men without prior biopsy.  
9602 The implication of this trial is that MRI-targeted biopsy could replace systematic  
9603 TRUS guided biopsy as the standard of care in the diagnosis of prostate cancer.



---

9604 **7.2 Hypotheses**

9605 The proportion of men with clinically significant cancer detected by MRI-targeted  
9606 biopsy will be no less than that detected by systematic TRUS guided biopsy.

9607 **7.3 Primary Objective**

9608 To determine whether the proportion of men with clinically significant cancer  
9609 (Gleason  $\geq 7$ ) detected by MRI-targeted biopsy is no less than systematic TRUS  
9610 guided biopsy.

9611 **7.4 Secondary Objectives**

9612 53. To determine whether the proportion of men with clinically significant cancer  
9613 (Gleason  $\geq 7$ ) detected by MRI-targeted biopsy is greater than systematic TRUS  
9614 guided biopsy.

9615 54. Proportion of men in each arm with clinically insignificant cancer detected.

9616 55. Proportion of men in each arm with Gleason  $\geq 4+3$  detected.

9617 56. Proportion of men in MRI arm who avoid biopsy.

9618 57. Proportion of men in the MRI arm whom the PI-RADS score for suspicion of  
9619 clinically significant cancer was 3, 4 or 5 but no clinically significant cancer was  
9620 detected.

9621 58. Proportion of men in each arm who go on to definitive local treatment (e.g.  
9622 radical prostatectomy, radiotherapy, brachytherapy) or systemic treatment (e.g.  
9623 hormone therapy, chemotherapy).

9624 59. Proportion of men in each arm who do not have significant cancer found at  
9625 baseline who develop a positive MRI and/or have a progressive lesion found on  
9626 MRI and/or have Gleason  $\geq 7$  cancer detected on a repeat biopsy (systematic or  
9627 targeted) by 2 years.

9628 60. Proportion of men with post-biopsy adverse events

9629 61. Health-related quality of life scores.

9630 62. Proportion with Gleason grade upgrading in men undergoing radical  
9631 prostatectomy.

9632 63. To determine the cost per diagnosis of cancer.

9633 64. To determine the impact of the addition of Gd based contrast compared to a non  
9634 contrast abbreviated MRI protocol on target yield

9635 65. To determine if a radiologist Likert score not based on Pi-Rads has a better target  
9636 yield than Pi\_Rads alone

9637

9638

9639 **7.5 Explanation for non-inferiority hypothesis**

9640 Due to the putative advantages of MRI-TB in reducing the number of men who  
9641 require a biopsy, reducing the number of cores required in each man who is  
9642 biopsied, more accurate representation of disease burden, less insignificant disease  
9643 detected and reducing the number of men at risk of complications of biopsy, the  
9644 primary outcome of detection of clinically significant cancer in each arm will be  
9645 compared using a non-inferiority hypothesis. Even if a similar amount of clinically  
9646 significant cancer is identified by MRI-TB to systematic TRUS guided biopsy, these

9647 advantages would support the use of MRI-TB instead of systematic TRUS guided  
9648 biopsy in clinical practice.  
9649

## 9650 **7.6 Anticipated timeline of study progression**

9651 The study will commence once sponsorship, ethical approval and local approvals  
9652 have been obtained at a participating site and once site initiation training has  
9653 occurred and a letter of site activation has been issued from the coordinating centre.  
9654 Additional sites may join after the study has commenced. At this time, five sites will  
9655 participate. Assuming a minimum recruitment rate of 3-6 men per site per month,  
9656 recruitment will be complete by 24 months, if not sooner. If accrual is slower than  
9657 expected, an additional 1-2 sites will be recruited for year 2.  
9658

| Month | Number of Sites | Total recruitment |
|-------|-----------------|-------------------|
| 0     | 2               | 0                 |
| 3     | 4               | 18-36             |
| 6     | 5               | 54-108            |
| 9     | 5               | 99-198            |
| 12    | 5               | 144-288           |
| 15    | 5               | 189-378           |
| 18    | 5               | 234-468           |
| 21    | 5               | 279-558           |
| 24    | 5               | 324-648           |

9659

## 9660 **8. Study Population**

### 9661 **8.1 Number of Subjects**

9662 Approximately 450 men with a clinical suspicion of prostate cancer, based on PSA or  
9663 results of digital rectal exam, with no prior biopsy will be eligible for participation.  
9664 Subjects must satisfy all inclusion and exclusion criteria. A sufficient number will be  
9665 enrolled (estimate: 450) to achieve at least 211 completed subjects per arm.

### 9666 **8.2 Subject inclusion criteria**

9667 In order to be eligible, all inclusion criteria must be met:

- 9668 19. Men at least 18 years of age referred with clinical suspicion of prostate cancer  
9669 who have been advised to have a prostate biopsy;
- 9670 20.  $\geq 5\%$  chance of high-grade prostate cancer as calculated using individualized risk  
9671 assessment of prostate cancer calculator, PCPTRC 2.0, found at  
9672 <http://deb.uthscsa.edu/URORiskCalc/Pages/calcs.jsp> For men under age 55,  
9673 the default age of 55 should be entered on the risk calculator.
- 9674 21. Serum PSA  $\leq 20$ ng/ml within 3 months of randomization
- 9675 22. Fit to undergo all procedures listed in protocol;
- 9676 23. Able to provide written informed consent.

### 9677 **8.3 Subject exclusion criteria**

9678 Men who meet the following criteria at the time of screening will be excluded:

- 9679 19. Prior prostate biopsy

- 
- 9680 20. Prior treatment for prostate cancer  
9681 21. Contraindication to MRI (e.g. claustrophobia, pacemaker, estimated GFR  
9682 ≤50mls/min)  
9683 22. Contraindication to prostate biopsy  
9684 23. Men in whom artifact would reduce the quality of the MRI, i.e. previous hip  
9685 replacement surgery, metallic hip replacement or extensive pelvic orthopaedic  
9686 metal work  
9687 24. Unfit to undergo any procedures listed in protocol.  
9688

## 9689 **9. Study design**

### 9690 **9.1 Study design**

9691 The study is a multi-centre, open-label randomized controlled trial, with men  
9692 randomized in a 1:1 ratio to one of two arms (see Trial Schema, section 9.2). Men in  
9693 Arm A will undergo a MRI followed by either a targeted biopsy of suspicious areas or  
9694 will be followed for two years if there is no suspicious areas identified by MRI. The  
9695 unbiopsied men will have a repeat MRI at 2 years. Men in Arm B will undergo a 12-  
9696 core systematic TRUS guided biopsy. All men in the study will be followed for two  
9697 years or until they have had radical treatment (whichever comes first).  
9698

9699  
9700  
9701

## 9.2 Study Trial Schema

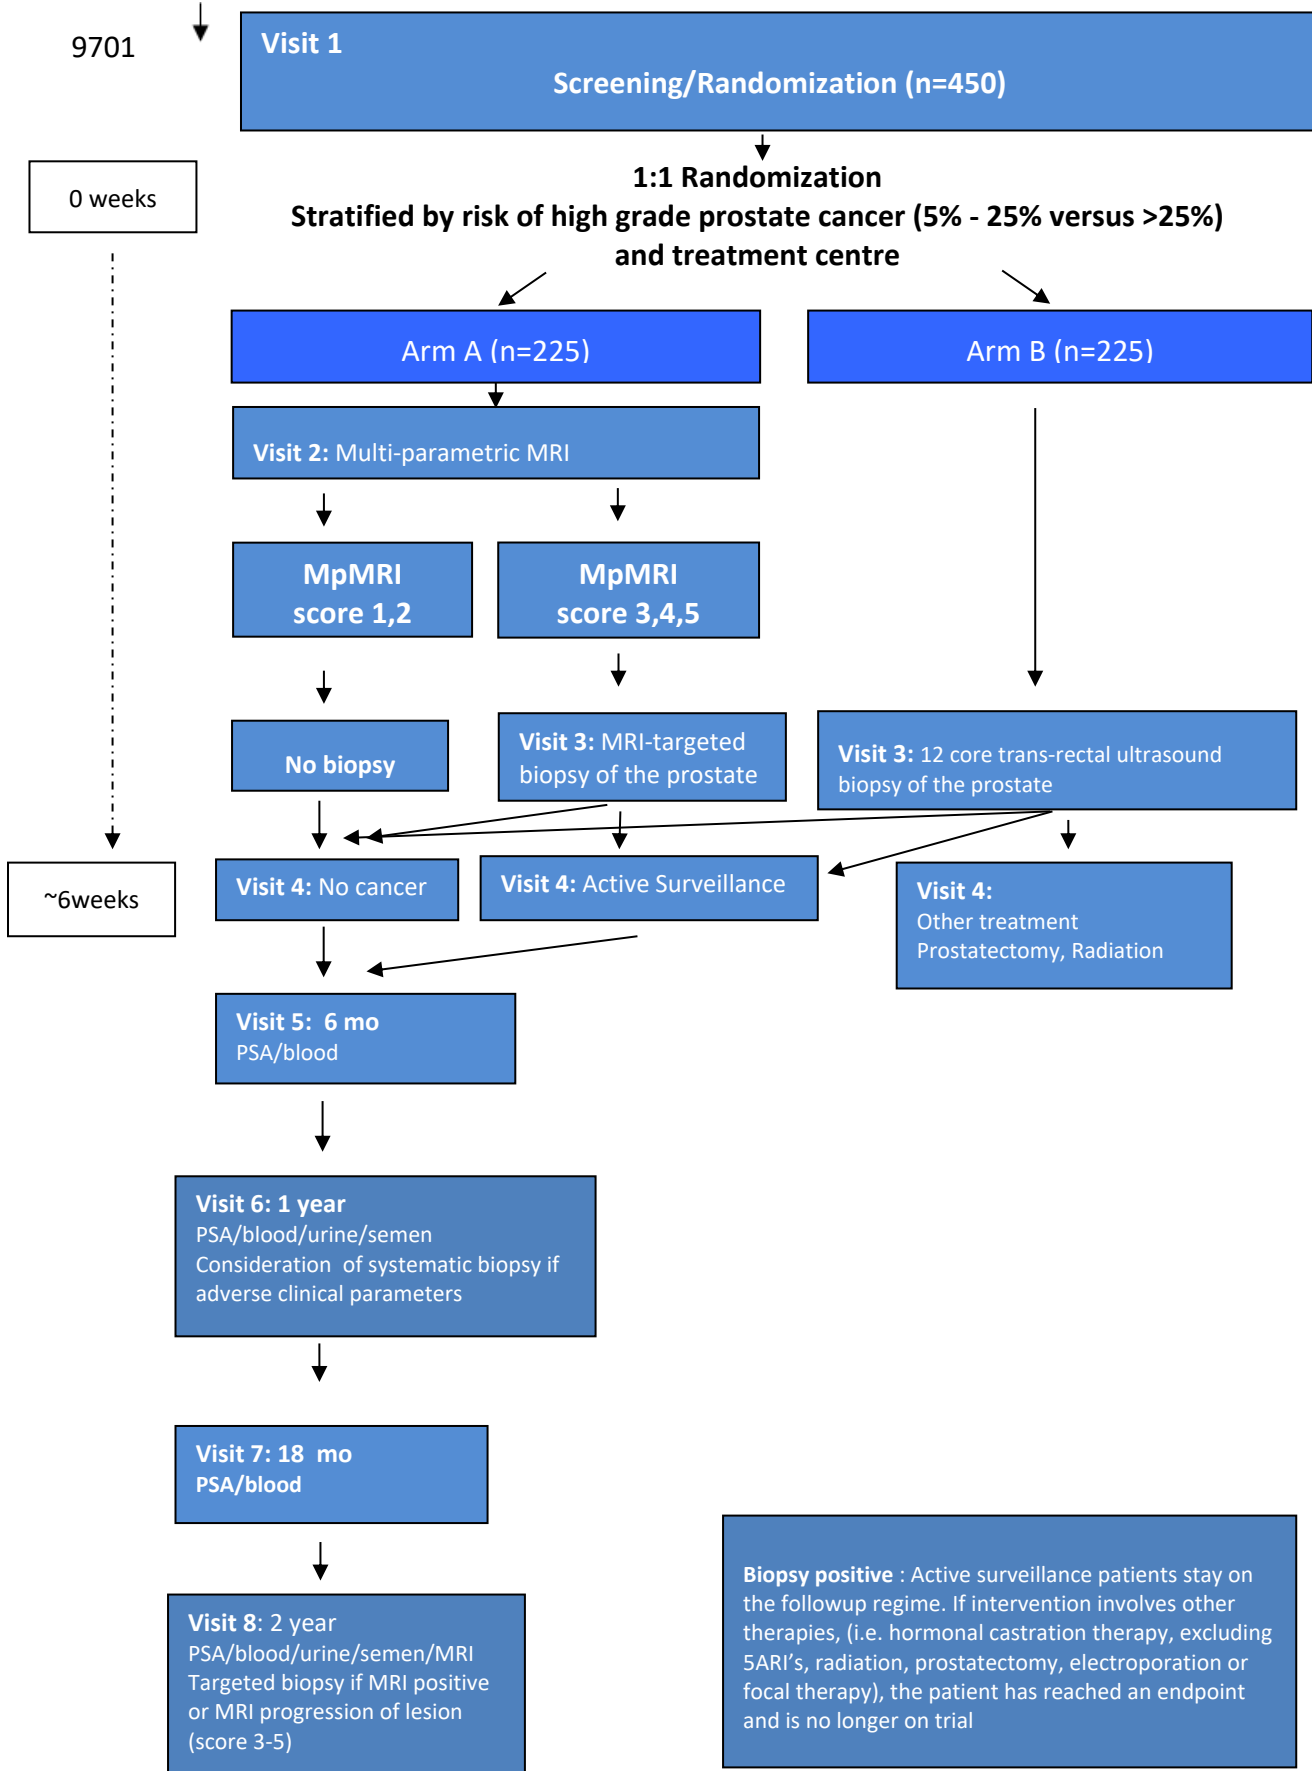

9702 **9.3 Timeline of subject contact**

9703 Tables 1, 2 and 3 illustrate the three individual subject pathways possible in the trial.

9704 The individual pathway that each subject experiences is dependent on both the arm he is randomized to and results of the tests.

9706

9707 **Table 1: ARM A: Men randomized to MRI arm who have a normal MRI and do not require**  
 9708 **a biopsy**

|                                            | Visit 1<br>Screening/<br>Randomization                  | Visit<br>2<br>MRI | Visit<br>3<br>N/A | Visit 4<br>Post-<br>Test | Visit 5<br>6 mos | Visit 6<br>1 year<br>follow<br>up | Visit 7<br>18<br>mos | Visit 8<br>2 year<br>follow<br>up |
|--------------------------------------------|---------------------------------------------------------|-------------------|-------------------|--------------------------|------------------|-----------------------------------|----------------------|-----------------------------------|
| <b>Weeks:</b>                              | 0                                                       | 1                 | 2                 | 5                        | 26               | 52                                | 78                   | 104                               |
| Consent                                    | X                                                       |                   |                   |                          |                  |                                   |                      |                                   |
| Screening (eligibility<br>review, med hx,  | X                                                       |                   |                   |                          |                  |                                   |                      |                                   |
| Vitals,                                    | X                                                       |                   |                   |                          |                  | X                                 |                      | X                                 |
| DRE <sup>1</sup>                           | X                                                       |                   |                   |                          |                  | X                                 |                      | X                                 |
| Randomization                              | X                                                       |                   |                   |                          |                  |                                   |                      |                                   |
| EQ-5D-5L                                   | X                                                       |                   |                   | X                        |                  |                                   |                      | X                                 |
| Correlative sample<br>collection:          |                                                         |                   |                   |                          |                  |                                   |                      |                                   |
| • blood                                    | X                                                       |                   |                   |                          | X                | X                                 | X                    | X                                 |
| • urine <sup>2</sup>                       | X                                                       |                   |                   |                          |                  | X                                 |                      | X                                 |
| • semen <sup>3</sup>                       | X                                                       |                   |                   |                          |                  | X                                 |                      | X                                 |
| • tissue-NA                                |                                                         |                   |                   |                          |                  |                                   |                      |                                   |
| Creatinine                                 | X                                                       |                   |                   |                          |                  |                                   |                      |                                   |
| PSA <sup>4</sup>                           | X                                                       |                   |                   |                          | X                | X                                 | X                    | X                                 |
| Systematic TRUS<br>guided biopsy           |                                                         |                   |                   |                          |                  |                                   |                      |                                   |
| MRI                                        |                                                         | X                 |                   |                          |                  |                                   |                      | X <sup>5</sup>                    |
| MRI-Targeted<br>Biopsy                     |                                                         |                   |                   |                          |                  |                                   |                      | X if<br>target                    |
| Immediate post-<br>biopsy<br>questionnaire |                                                         |                   |                   |                          |                  |                                   |                      |                                   |
| Follow up for<br>results of tests          |                                                         |                   |                   | X                        |                  |                                   |                      |                                   |
| Treatment decision <sup>6</sup>            |                                                         |                   |                   | X                        |                  |                                   |                      |                                   |
| 30-day post-biopsy<br>questionnaire        |                                                         |                   |                   |                          |                  |                                   |                      |                                   |
| AE/SAE                                     | Complete as required at any time following registration |                   |                   |                          |                  |                                   |                      |                                   |
| Withdrawal Form                            | Complete as required at any time following registration |                   |                   |                          |                  |                                   |                      |                                   |
| ConMeds Form                               | Complete as required at any time following registration |                   |                   |                          |                  |                                   |                      |                                   |

9709

---

9710 <sup>1</sup>Urine sample will be required PRE and POST DRE, if subject has agreed to the Correlative  
9711 Science component. See correlative manual for instruction.  
9712 <sup>2</sup>Urine samples will be collected at select visits, this may include 2 samples, 'Random-First  
9713 catch' and post-DRE samples. See the Correlative Science Manual for further details on  
9714 collection and processing.  
9715 <sup>3</sup>Collected at baseline, and annually.  
9716 <sup>4</sup>PSA will have been done prior to visit 1 as part of screening.  
9717 <sup>5</sup> If MRI indicates a target, biopsy must be done  
9718 <sup>6</sup>After treatment decision men revert to standard of care.  
9719

9720  
9721

**Table 2: ARM A: Men randomized to MRI arm who have a lesion on MRI and require a biopsy**

|                                              | Visit 1<br>Screening<br>/<br>Randomization                 | Visit<br>2<br>MRI | Visit 3<br>Biopsy | Visit 4<br>Post-<br>test | Visit 5<br>6 mos | Visit 6<br>1 year<br>follow<br>up | Visit<br>7<br>18<br>mos | Visit 8<br>2 year<br>follo<br>w up |
|----------------------------------------------|------------------------------------------------------------|-------------------|-------------------|--------------------------|------------------|-----------------------------------|-------------------------|------------------------------------|
| <b>Weeks:</b>                                | 0                                                          | 1                 | 2                 | 6                        | 26               | 52                                | 78                      | 104                                |
| Consent                                      | X                                                          |                   |                   |                          |                  |                                   |                         |                                    |
| Screening<br>(eligibility review,<br>med hx) | X                                                          |                   |                   |                          |                  |                                   |                         |                                    |
| Vitals,                                      | X                                                          |                   |                   |                          |                  | X                                 |                         | X                                  |
| DRE <sup>1</sup>                             | X                                                          |                   |                   |                          |                  | X                                 |                         | X                                  |
| Randomization                                | X                                                          |                   |                   |                          |                  |                                   |                         |                                    |
| EQ-5D-5L                                     | X                                                          |                   |                   | X                        |                  |                                   |                         | X                                  |
| Correlative<br>sample collection:<br>• blood | X                                                          |                   |                   |                          | X                | X                                 | X                       | X                                  |
| • urine <sup>2</sup>                         | X                                                          |                   |                   |                          |                  | X                                 |                         | X                                  |
| • semen <sup>3</sup>                         | X                                                          |                   |                   |                          |                  | X                                 |                         | X                                  |
| • tissue <sup>4</sup>                        |                                                            |                   | X                 |                          |                  |                                   |                         | X                                  |
| Creatinine                                   | X                                                          |                   |                   |                          |                  |                                   |                         |                                    |
| PSA <sup>5</sup>                             | X                                                          |                   |                   |                          | X                | X                                 | X                       | X                                  |
| Systematic TRUS<br>guided biopsy             |                                                            |                   |                   |                          |                  |                                   |                         |                                    |
| MRI                                          |                                                            | X                 |                   |                          |                  |                                   |                         | X <sup>6</sup>                     |
| MRI-Targeted<br>Biopsy                       |                                                            |                   | X                 |                          |                  |                                   |                         | X <sup>6</sup>                     |
| Immediate post-<br>biopsy<br>questionnaire   |                                                            |                   | X                 |                          |                  |                                   |                         |                                    |
| Follow up for<br>results of tests            |                                                            |                   |                   | X                        |                  |                                   |                         |                                    |
| Treatment<br>decision <sup>7</sup>           |                                                            |                   |                   | X                        |                  |                                   |                         |                                    |
| 30-day post-<br>biopsy<br>questionnaire      |                                                            |                   |                   | X                        |                  |                                   |                         |                                    |
| AE/SAE                                       | Complete as required at any time following<br>registration |                   |                   |                          |                  |                                   |                         |                                    |
| Withdrawal Form                              | Complete as required at any time following<br>registration |                   |                   |                          |                  |                                   |                         |                                    |
| ConMeds Form                                 | Complete as required at any time following<br>registration |                   |                   |                          |                  |                                   |                         |                                    |

9722  
9723

---

9724 <sup>1</sup>Urine sample will be required PRE and POST DRE, if subject has agreed to the Correlative  
9725 Science component. See correlative manual for instruction.  
9726 <sup>2</sup>Urine samples will be collected at select visits, this may include 2 samples, 'Random-First  
9727 catch' and post-DRE samples. See the Correlative Science Manual for further details on  
9728 collection and processing.  
9729 <sup>3</sup>Collected at baseline, and annually.  
9730 <sup>4</sup> tissue should be obtained if subject has agreed to the Correlative Science component. See  
9731 correlative manual for instruction.  
9732 <sup>5</sup>PSA will have been done prior to visit 1 as part of screening.  
9733 <sup>6</sup>See protocol Section 10.11.1: If MRI indicates a target, biopsy must be done, and tissue  
9734 obtained for correlative science studies if subject has agreed to the Correlative Science  
9735 component. See correlative manual for instruction.  
9736 <sup>7</sup>After treatment decision men revert to standard of care.  
9737  
9738  
9739  
9740  
9741  
9742  
9743  
9744  
9745  
9746  
9747  
9748  
9749  
9750  
9751  
9752  
9753  
9754  
9755  
9756  
9757  
9758  
9759  
9760  
9761  
9762  
9763  
9764  
9765  
9766  
9767  
9768  
9769  
9770  
9771  
9772  
9773  
9774



**Table 3: ARM B: Men randomized to systematic TRUS guided biopsy arm**

|                                              | Visit 1<br>Screening/<br>Randomization                  | Visit<br>2 | Visit 3<br>Biopsy | Visit 4<br>Post-<br>test<br>visit | Visit 5<br>6 mos | Visit<br>6<br>1<br>year<br>follo<br>w up | Visit 7<br>18<br>mos | Visit 8<br>2 year<br>follow<br>up |
|----------------------------------------------|---------------------------------------------------------|------------|-------------------|-----------------------------------|------------------|------------------------------------------|----------------------|-----------------------------------|
| <b>Weeks:</b>                                | 0                                                       | 1          | 2                 | 6                                 | 26               | 52                                       | 52                   | 104                               |
| Consent                                      | X                                                       |            |                   |                                   |                  |                                          |                      |                                   |
| Screening<br>(eligibility review,<br>med hx) | X                                                       |            |                   |                                   |                  |                                          |                      |                                   |
| Vitals,                                      | X                                                       |            |                   |                                   |                  | X                                        |                      | X                                 |
| DRE <sup>1</sup>                             | X                                                       |            |                   |                                   |                  | X                                        |                      | X                                 |
| Randomization                                | X                                                       |            |                   |                                   |                  |                                          |                      |                                   |
| EQ-5D-5L                                     | X                                                       |            |                   | X                                 |                  |                                          |                      | X                                 |
| Correlative sample<br>collection:<br>• blood | X                                                       |            |                   |                                   | X                | X                                        | X                    | X                                 |
| • urine <sup>2</sup>                         | X                                                       |            |                   |                                   |                  | X                                        |                      | X                                 |
| • semen <sup>3</sup>                         | X                                                       |            |                   |                                   |                  | X                                        |                      | X                                 |
| • tissue                                     |                                                         |            | X                 |                                   |                  |                                          |                      |                                   |
| Creatinine                                   | X                                                       |            |                   |                                   |                  |                                          |                      |                                   |
| PSA <sup>4</sup>                             | X                                                       |            |                   |                                   | X                | X                                        | X                    | X                                 |
| Systematic TRUS<br>guided biopsy             |                                                         |            | X                 |                                   |                  |                                          |                      |                                   |
| MRI                                          |                                                         |            |                   |                                   |                  |                                          |                      | X <sup>5</sup>                    |
| MRI-Targeted<br>Biopsy                       |                                                         |            |                   |                                   |                  |                                          |                      | X <sup>5</sup>                    |
| Immediate post-<br>biopsy<br>questionnaire   |                                                         |            | X                 |                                   |                  |                                          |                      |                                   |
| Follow up for<br>results of tests            |                                                         |            |                   | X                                 |                  |                                          |                      |                                   |
| Treatment<br>decision <sup>6</sup>           |                                                         |            |                   | X                                 |                  |                                          |                      |                                   |
| 30-day post-biopsy<br>questionnaire          |                                                         |            |                   | X                                 |                  |                                          |                      |                                   |
| AE/SAE                                       | Complete as required at any time following registration |            |                   |                                   |                  |                                          |                      |                                   |
| Withdrawal Form                              | Complete as required at any time following registration |            |                   |                                   |                  |                                          |                      |                                   |
| ConMeds Form                                 | Complete as required at any time following registration |            |                   |                                   |                  |                                          |                      |                                   |

---

9778 <sup>1</sup>Urine sample will be required PRE and POST DRE, if subject has agreed to the Correlative  
9779 Science component. See correlative manual for instruction.

9780 <sup>2</sup>Urine samples will be collected at select visits, this may include 2 samples, 'Random-First  
9781 catch' and post-DRE samples. See the Correlative Science Manual for further details on  
9782 collection and processing.

9783 <sup>3</sup>Collected at baseline, and annually.

9784 <sup>4</sup>PSA will have been done prior to visit 1 as part of screening.

9785 <sup>5</sup>See protocol Section 10.11.1: If MRI indicates a target, biopsy must be done, and tissue  
9786 obtained for correlative science studies if subject has agreed to the Correlative Science  
9787 component. See correlative manual for instruction.

9788 <sup>6</sup>After treatment decision men revert to standard of care.

9789

9790

## 9791 **10. Trial Interventions and procedures**

9792

9793 The following procedures will be applied as necessary to subjects enrolled in both  
9794 arm of the trial.

### 9795 **10.1 EQ-5D-5L Questionnaires**

9796

#### 9797 **For all subjects enrolled in trial**

9798 Once enrolled into the study, all men will be asked to fill out an EQ-5D-5L  
9799 questionnaire (Appendix 4), which is a validated 2-page questionnaire which aims to  
9800 evaluate health related quality of life. It takes approximately 2 minutes to complete.

- 9801 • All subjects should complete the baseline questionnaire at the screening visit  
9802 before leaving the department.
- 9803 • Subjects who have a normal MRI and do not require a biopsy will complete an  
9804 EQ-5D-5L questionnaire at Visit 4.
- 9805 • Subjects undergoing MRI-targeted biopsy or a systematic TRUS guided biopsy will  
9806 be given an EQ-5D-5L questionnaire to fill out at 30 days post biopsy. The date  
9807 that the subject should fill out the questionnaires should be written on top of the  
9808 questionnaire. (This can also be done at Visit 4).
- 9809 • All subjects should complete the EQ-5D-5L questionnaire at the 2 year follow up  
9810 visit.

9811

9812

### 9813 **10.2 Multiparametric MRI imaging procedure**

#### 9814 **For subjects in Arm A only**

9815

#### 9816 **10.2.1 MRI Protocol**

9817 A non-endorectal coil MRI will be carried out in 3.0 Tesla scanner with a pelvic  
9818 phased array coil and an automated injector system with the subject in the supine  
9819 position. T2-weighted (T2W), diffusion weighted (DWI) and dynamic contrast  
9820 enhanced (DCE) scans will be acquired as per the requirements set out by PI-RADS  
9821 v2.

9822

---

9823 Within the specified PI-RADS 2 framework a common protocol will be formulated by  
9824 a consensus of the radiologists involved in the trial at each site at a startup meeting.  
9825 The highest agreed upon b-value image for DWI (at least 1400s/mm<sup>2</sup>) will be  
9826 selected for all sites to ensure consistency. Similarly, the spatial resolution, contrast  
9827 media, injection rates and dynamic scanning temporal resolution will be matched for  
9828 all sites. An optional multi b value DWI acquisition will be undertaken as well to  
9829 allow for ancillary studies into non log linear apparent diffusion coefficient (ADC)  
9830 models for tumor characterization. This is summarized in an MRI Operations Manual  
9831  
9832  
9833 Subjects will be asked to follow their local standard of care MRI examination  
9834 preparation instructions for the MRI procedure.

### 9835 **10.2.2 MRI reporting**

9836 The MRI will be reported by an experienced radiologist using the MRI Reporting  
9837 Proforma(See Appendix 2) to be filed in the study folder. The MPMRI will be scored  
9838 based on the PI-RADS v2 scoring system [2]. Radiologists will also provide a 5  
9839 point Likert score for purposes of comparison. Biopsy decisions will be based on the  
9840 PI-RADS scores.

9841

9842

9843 Lesions in the prostate will be scored on the following scale:

9844 PI-RADS 1 – Very low (clinically significant cancer is highly unlikely to be  
9845 present)

9846 PI-RADS 2 – Low (clinically significant cancer is unlikely to be present)

9847 PI-RADS 3 – Intermediate (the presence of clinically significant cancer is  
9848 equivocal)

9849 PI-RADS 4 – High (clinically significant cancer is likely to be present)

9850 PI-RADS 5 – Very high (clinically significant cancer is highly likely to be  
9851 present)

9852

9853 The location of the suspicious areas in the prostate should be marked on a diagram  
9854 of the prostate (see Appendix 2) and the sector numbers containing each suspicious  
9855 area should be recorded in the case report form.

9856

9857 Radiologists will be blinded to the PSA.

9858

9859

9860 Imaging interpretation will be carried out at each site, however ensuring consistency  
9861 and quality of imaging interpretation is crucial. A central imaging site will be  
9862 designated with a lead radiologist (Sunnybrook, MH). A single radiologist at each site  
9863 will perform the interpretation of all images for that site. The designated radiologist  
9864 must have experience of interpreting at least 200 MRI's using PI-RADS 1 or 2.A  
9865 startup meeting involving all radiologists will be held prior to start of accrual where  
9866 each site will bring 5 MRI cases performed at their site for consensus review, scoring  
9867 and discussion. This will provide a commonality of approach to interpretation among  
9868 the radiologists before the study begins. After this startup meeting each site will

---

9869 send one set of MRI images and its interpretation for central review for site  
9870 qualification.

9871

9872 A copy of all images will be sent on CD/DVD to the central site for archiving.

### 9873 **10.3 No target identified on MPMRI (PI-RADS 1 or 2)**

#### 9874 **For subjects in Arm A only, who do not require a biopsy**

9875 Men who have MRIs that do not identify any suspicious lesion will not receive a  
9876 biopsy. These subjects will benefit from being part of the trial as a result of not  
9877 having to undergo an invasive biopsy procedure, avoiding the discomfort associated  
9878 with the procedure, the risk of being diagnosed with clinically insignificant cancer  
9879 and the risk of sepsis associated with the biopsy procedure. Studies suggest that if  
9880 the MRI does not identify areas suspicious for cancer there is an 85-95% chance that  
9881 clinically significant cancer is not present [28, 34, 35].

9882

9883 As soon as the results of the MRI are discussed with the subject, their treatment  
9884 decision will be recorded and they will return to standard of care management. As  
9885 part of standard of care these subjects can undergo further PSA surveillance and / or  
9886 prostate biopsies if indicated.

### 9887 **10.4 MRI-Targeted biopsy**

#### 9888 **For subjects in Arm A who do require a biopsy**

#### 9889 **10.4.1 MRI choice of targets for targeted biopsy**

9890 Men whose prostates contain a suspicious area with a PI-RADS score of 3, 4 or 5 will  
9891 subsequently undergo targeted biopsy by a Urologist or Radiologist experienced in  
9892 MRI-targeted biopsy. Operator experience (number of targeted biopsies performed  
9893 to date) will be recorded before each procedure. The number of biopsy operators  
9894 should be kept to the minimum number possible.

9895

9896 Targets will be stratified by PI-RADS score and if the same score then by size and  
9897 labeled T1, T2, T3...etc. If there are more than 3 lesions with a score of 3 or more  
9898 only T1-T3 will be targeted. The radiologist should record the sectors involved with  
9899 tumor in order of most to least involved using the PI-RADS v2 sector scheme.

9900 The number of biopsy operators should be kept to the minimum number possible.

9901

9902 Subjects in the MRI cohort will not have systematic biopsies, with one exception.

9903 Those whose MRI is grade 3M (a multifocal pattern suggesting multifocal small  
9904 volume cancer, with PSA Density >0.15 and no focal lesion), a systematic 12 core  
9905 biopsy will be conducted.

#### 9906 **10.4.2 MRI Biopsy**

9907 The procedure will be performed in the outpatient departments of sites possessing  
9908 the required equipment by a clinician competent in TRUS/MRI-targeted biopsy. An  
9909 operator must have performed at least 50 targeted biopsy cases on the TRUS/MRI  
9910 fusion system at their institution before they are qualified to participate as an  
9911 operator in the study.

---

9912  
9913 Coumarin anticoagulant, clopidogrel treatment and other relevant  
9914 anticoagulants/antiplatelets will be discontinued up to 10 days before biopsy and  
9915 advice sought as to appropriate substitutes if indicated. Aspirin will be continued at  
9916 the discretion of the physician doing the biopsy.  
9917  
9918 Prophylactic quinolone antibiotics shall be given as per local guidelines. Biopsies will  
9919 be performed via the trans-rectal route or via the trans-perineal route depending  
9920 upon local practice.  
9921  
9922 Targeted biopsies should be performed by software-assisted fusion devices  
9923 (i.e.(Artemis, made by Eigen, or Urostation, by Koelis)[34, 36, 37, 40,41].This  
9924 software is safe and poses no risks to the subject since the same CE-marked  
9925 ultrasound probes that are designed to perform the biopsy when performed as  
9926 standard of care biopsy are used during targeted biopsy. Should the operator wish to  
9927 not use the information provided by the software registration system and use  
9928 cognitive (visual) registration alone they can do so, but should indicate this on the  
9929 subject’s case report form.  
9930  
9931 The samples per target will be 4cores spread across the target region for a maximum  
9932 total of 12 cores as a maximum of 3 targets can be identified. Biopsies should be  
9933 conducted in order meaning T1 then T2 then T3.  
9934  
9935 Biopsy cores from different suspicious areas will be aliquoted separately. The vials  
9936 will be labeled “T1a-d”, “T2a-d” and “T3a-d” (according to how many targets there  
9937 are) which should match the assignment of suspicious areas by the radiologist on the  
9938 MRI report. The order of lettering a-d should match the order in which the biopsies  
9939 were performed in each region. The first biopsy should be at the center of the target  
9940 and the remaining fanning out from the center. Each core from the same suspicious  
9941 area must be submitted separately. Alternative methods of storing cores that allow  
9942 identification of the order of score samples from each target are acceptable.  
9943  
9944 **10.5 Systematic TRUS guided biopsy**  
9945 **For all subjects in Arm B**  
9946 Systematic TRUS guided biopsy is the current standard of care for the diagnosis of  
9947 prostate cancer [4, 17]. Systematic TRUS guided biopsy can be performed at the local  
9948 site of recruitment.  
9949  
9950 A clinician competent in systematic TRUS guided biopsy will perform the procedure.  
9951 The experience of the operator (number of systematic TRUS guided biopsies  
9952 performed to date) will be recorded prior to each procedure. Software that guides  
9953 clinicians in placing biopsy cores should not be used.  
9954  
9955 Coumarin anticoagulant, clopidogrel treatment and other relevant  
9956 anticoagulant/antiplatelet medication will be discontinued5 to 10 days before biopsy  
9957 and advice sought as to appropriate substitutes if indicated. Aspirin will be continued  
9958 at the discretion of the physician doing the biopsy.

---

9959

9960 The subject will be positioned in left lateral position. 10-12 core biopsies will be  
9961 taken as per guidelines [42] under appropriate anaesthesia. Biopsies will be directed  
9962 to the peripheral zone (See Appendix 3 for standardized method for conducting 12-  
9963 core systematic TRUS guided biopsy). Prophylactic quinolone antibiotics shall be  
9964 given as per local guidelines.

### 9965 **10.6 Pathology**

9966 The 2005 International Society of Urological Pathology guidelines for Gleason  
9967 Grading of Prostatic Carcinoma will be followed [43].

9968

9969 For men undergoing MRI-targeted biopsy it is required that pathology reported per  
9970 suspicious area targeted and per targeted core. For systematic TRUS guided biopsy,  
9971 each core will be reported and graded.

### 9972 **10.7 Post-procedural care**

9973 **For all subjects in ARMS A and B receiving a biopsy**

9974 After a biopsy procedure the subject can be discharged within 2-3 weeks for results  
9975 of the histopathology and treatment options to be discussed.

### 9976 **10.8 Immediate post-biopsy questionnaire**

9977 **For all subjects in ARMS A and B receiving a biopsy**

9978 A modified version of a self-reported questionnaire validated previously [39] in the  
9979 assessment of post-biopsy complications will be completed immediately post-biopsy  
9980 after MRI-TB and after systematic TRUS guided biopsy (Appendix 7). The subject  
9981 should complete the immediate post-biopsy questionnaire before they leave the  
9982 department. It aims to assess intensity of discomfort and pain associated with the  
9983 procedure.

### 9984 **10.9 30-day post-biopsy questionnaire**

9985 **For all subjects in ARMS A and B receiving a biopsy**

9986 A modified version of a self-reported questionnaire validated previously [39] in the  
9987 assessment of post-biopsy complications at 30 days post-biopsy should be given to  
9988 all subjects undergoing MRI-TB or systematic TRUS guided biopsy to take home  
9989 (Appendix 8). The subject should fill this out on day 30 following the procedure. It  
9990 should take 5 minutes to fill out. The date that the participant should complete the  
9991 questionnaire should be written on top of the questionnaire. Data on specific biopsy-  
9992 related complications including pain, fever, hematuria, hematochezia,  
9993 hematospermia, urinary retention and urinary incontinence will be recorded. Any  
9994 other adverse events will not be recorded. Contact with healthcare and resource  
9995 used data following the biopsy will also be ascertained. The completed questionnaire  
9996 can be returned to the investigator in a pre-addressed envelope.

9997

9998 Subjects should be reminded at 30 days to complete this questionnaire.

---

9999 **10.10 Results and treatment decision (Visit 4)**

10000 The results of the biopsies and/or MRI will be explained to the subject by the clinical  
10001 care team during this visit, which is approximately 2-3 weeks after the biopsy.

10002 The research team should record the treatment decision in the subject file.

10003 Possibilities for treatment decision include but are not limited to:

- 10004 • Further diagnostic test (e.g. PSA, biopsy, MRI)
- 10005 • Active Surveillance
- 10006 • Radical treatment (e.g. radical prostatectomy, radical radiotherapy)
- 10007 • Focal therapy (e.g. high intensity focused ultrasound, cryotherapy)
- 10008 • Hormone therapy

10009 **10.11 Follow up period**

10010 All study participants will be followed up for up to two years or until they have  
10011 radical treatment. Each year, subjects will be surveyed to obtain the following  
10012 information:

- 10013 • time to cancer diagnosis
- 10014 • Gleason score progression
- 10015 • time to intervention on active surveillance
- 10016 • time on active surveillance
- 10017 • PSA
- 10018 • All subjects in both Arm A and B who have remained either undiagnosed or  
10019 untreated (on active surveillance) will have a follow up MRI 2 years after  
10020 study entry.

10021

10022 **10.11.1 Indications for biopsies off protocol**

10023 For subjects who are not biopsied due to a negative MRI, have negative or non-  
10024 significant systematic biopsies, or who have a positive MRI but no or non-significant  
10025 cancer on targeted biopsy, the following are guidelines for subjects management  
10026 during the 2 year follow up period.

10027 It is an accepted standard of care in Ontario for subjects on active surveillance or  
10028 with a prior negative biopsy who have a worsening risk profile to undergo mpMRI  
10029 followed by targeted biopsy. We propose the following guidelines for risk profile  
10030 assessment and consideration of repeat biopsy

10031 Subjects should continue to be followed with semi-annual PSA and DRE. A biopsy  
10032 should be considered under one or more of the following circumstances:

- 10033 1. For men with PSA density < 0.15, biopsy if an increase in PSA density > 0.15.
- 10034 2. For men with PSA density > 0.15, or a baseline PSA > 10, biopsy if a 50% increase  
10035 in PSA in 1 year.
- 10036 3. Biopsy if a doubling of the risk of high grade cancer according to the NCI  
10037 nomogram.

---

10038 4. Biopsy if development of a suspicious nodule on DRE.  
10039  
10040 5. For men with a positive study MRI (especially PI-RADS 4 or 5) and a  
10041 targeted biopsy which was negative or showed only Gleason 6 cancer, biopsy if  
10042 there is a 50% or more increase in PSA over 1 year or a PSA density > 0.15.  
10043  
10044 24. For men on the systematic biopsy arm which was negative or showed only  
10045 Gleason 6 cancer, biopsy if there is a 50% or more increase in PSA over 1 year or  
10046 a PSA density > 0.15. An MRI and targeted biopsy may be warranted in these  
10047 subjects.  
10048  
10049  
10050 These are guidelines and should be interpreted with clinical judgment.  
10051  
10052 Follow-up will cease once treatment beyond active surveillance is undertaken  
10053 (prostatectomy, radiation therapy, focal therapy, etc.)  
10054 PSA and biopsy results will be evaluated in subjects in whom the 2 year MRI  
10055 identifies a target.

#### 10056 **10.12 Additional tests for biomarker discovery - Optional**

10057 Though not related to the primary outcome of this study, this cohort represents a  
10058 unique opportunity to obtain human samples for future biomarker discovery studies.  
10059 Participants will be consented to provide a blood, urine, semen, and tissue sample  
10060 after the consent and screen visit, and subsequent visits for storage and use in future  
10061 biomarker studies. In addition, men will be consented for use of the prostate biopsy  
10062 tissue in the biomarker discovery studies.  
10063

10064 We propose two initial biomarker analyses for men recruited to the PRECISE study.  
10065 First we propose testing the utility of several genetic assays. These include the  
10066 SELECT MDx test (a urine based genomic assay), the Telo PC test (an analysis of  
10067 telomere structure in circulating tumour cells), the Exosome Dx assay (urine based  
10068 exosome assay), the Mitomics assay (circulating mitochondrial DNA deletion assay),  
10069 and the MDNA test (a urine based microRNA assay). We will test the hypothesis that  
10070 alongside conventional PSA measurements, these tests may identify subjects whose  
10071 MRI was initially negative for prostate cancer, but who are at high risk of harboring  
10072 clinically significant disease as detected by the secondary MRI at 2 years. We will  
10073 also test the association between serum biomarkers and clinically significant or  
10074 clinically insignificant prostate cancer detected during the PRECISE study. We will  
10075 also explore the potential for these assays to provide additional information over  
10076 and above Gleason grade. These studies will be separately funded from PRECISE.  
10077

10078 Sequential blood sampling during the 2 years of follow up (prior to a 2 year MRI) will  
10079 be planned to assess markers which might identify men at higher risk of developing  
10080 prostate cancer.



---

10081 **10.12.1 Samples to be collected for future biomarker discovery work**  
10082 **(Optional)**

10083 Participants will be asked to consent to provide a blood, urine, semen, and tissue  
10084 sample after the consent and screen visit and subsequent visits for storage and use  
10085 in future biomarker studies. This will involve a separate consent form.

10086 Samples include:

- 10087 • Blood –10mls serum, 15mls plasma, 10mls whole blood, 5mls buffy coat
- 10088 • Urine – 75 mls urine
- 10089 • Semen-1-5 cc (single ejaculate)
- 10090 • Tissue-unstained biopsy sections -15 unstained slides from cancer, and  
10091 -15 unstained slide from non-cancer cores  
10092 (if possible)

10093

10094 **10.12.2 Correlative Science Component**

10095

10096 Within this protocol biomarker and genetic validation studies and biomarker  
10097 discovery research will be incorporated to correlate molecular readouts with the  
10098 presence of Gleason 4 or 5 pattern on biopsy. The goal of these studies is to  
10099 develop a liquid based assay (serum, plasma, CTCs, urine, or semen) which  
10100 accurately predicts the presence of clinically significant cancer. The correlative  
10101 science component of Precise constitutes a major initiative, with multiple  
10102 collaborators and planned studies. These are briefly summarized below.

10103

10104 Biomaterials (serum, plasma, buffy coat, PRE/POST DRE urine and tissue from  
10105 biopsies) will be collected at times specified in the protocol. Sample collection will be  
10106 restricted to subjects who have agreed to provide these samples in a separate  
10107 optional informed consent. If a subject withdraws consent for the additional  
10108 biomarker and genetic testing, subject's samples will be destroyed. The investigator  
10109 must notify the sponsor site contact who will request the samples destruction.

10110 Biomaterials for the correlative science studies will be identified with a unique  
10111 identification code, date of collection and will not contain any personal identification  
10112 information. The samples will be shipped to a secure long-term storage facility,  
10113 identified as the Ontario Institute for Cancer Research, located at 661 University Ave,  
10114 Suite 510, Toronto, ON M5G 0A3. Samples for the correlative science studies will be shipped  
10115 stored and analyzed according to specified, specialized procedures in the Precise Correlative  
10116 Science Manual.

10117

10118 A group of investigators led by Drs. Paul Boutros (OICR) and George Rodriguez  
10119 (UWO) have obtained funding for a correlative science study nested in the Precise  
10120 trial. This study is termed the 'Translational Research Initiative in Prostate Cancer',  
10121 or TRIPC. Biomaterial will be collected for these studies as above. A summary of  
10122 the planned studies is as follows:

10123

10124 [Urine: The TRIPC project will measure the proteomes of urine specimens using](#)  
10125 [either a whole proteome assay or Selective Reaction Monitoring - Mass](#)  
10126 [Spectroscopy \(SRM-MS\) or Peptide Reaction Mass Spectroscopy \(PRM-MS\) for a](#)  
10127 [panel of ~50 peptides. These peptides will be used to score two published](#)  
10128 [biomarkers of disease aggressivity](#)

---

10129 (<https://www.nature.com/articles/ncomms11906>). The PRECISE data will then be  
10130 used to retrain the parameters and weights of the biomarkers as an exploratory  
10131 analysis.

10132

10133 Blood: Genotypes will be measured using either DNA-sequencing or genotyping  
10134 arrays. The resulting data will be used to score five distinct biomarkers: a germline-  
10135 incidence biomarker created by the PRACTICAL GWAS consortium, a biomarker of  
10136 aggressive prostate cancer created by the PRACTICAL GWAS consortium, a panel of  
10137 DNA repair genes identified by the SU2C group and two biomarkers of disease  
10138 aggression identified by the CPC-GENE network. The PRECISE data will then be used  
10139 to retrain the parameters and weights of the CPC-GENE biomarkers as an  
10140 exploratory analysis. Second, methylation of cell-free DNA will be assessed using  
10141 microarray platforms (either tiling or CpG island arrays) to score two existing  
10142 signatures of aggressive prostate cancer.

10143

10144 Tissue

10145 Tumour biopsies will be subject to OncoScan microarray profiling and/or DNA  
10146 sequencing to measure methylome, somatic single nucleotide variants, copy number  
10147 aberrations, genomic rearrangements and mitochondrial copy number. Seven  
10148 signatures of aggressive prostate cancer will be scored: the proportion of the  
10149 genome altered (PGA, Lalonde et al. Lancet Oncology), 100-locus and 31-locus  
10150 signatures (Lalonde et al. European Urology), a multi-modal signature (Fraser et al.  
10151 Nature), a mitochondrial signature (Hopkins et al. Nature Communications), and two  
10152 unpublished signatures developed by the CPC-GENE network: of tumour evolution  
10153 and of the tumour methylome. The PRECISE data will be used to retrain the  
10154 parameters and weights of the biomarkers as an exploratory analysis.

10155

10156

10157 A second group, led by Dr. Keith Jarvi, will analyze semen for biomarkers of  
10158 significant prostate cancer. They will utilize **deep targeted Next-Generation  
10159 sequencing of cell-free DNA and tumor cells Isolated from semen.**

10160

- 10161 • **Contact information:** Dr. Keith Jarvi/Dr. Andrei Drabovich  
10162 Murray Koffler Urologic Wellness Centre, 60 Murray Street, 6/F  
10163 Toronto, ON M5T 3L9

10164

10165 Semen has potentially high amounts of exfoliated prostate epithelial cells and high  
10166 concentrations of prostate-derived cell-free DNA amenable to measurement by the  
10167 deep next generation DNA sequencing. The clear advantage of semen is its use as a  
10168 fluid for biomarker identification as well as a clinical specimen for non-invasive  
10169 diagnostics. In addition, semen and SP analysis may facilitate early cancer diagnosis  
10170 since exfoliated PCa cells and PCa-specific cell-free DNA will appear in semen much  
10171 earlier and prior to destruction of prostate-blood barrier and diffusion of cells and  
10172 cell-free DNA into the blood.

10173 Dr. Jarvi's group will focus on known gene fusions and point mutations in exomes of  
10174 genes frequently mutated in PCa. They used the next generation DNA sequencing  
10175 data uploaded to the cBioPortal. That included 841 primary prostate cancer tissues

---

10176 sequenced by the Cancer Genome Atlas, Broad Institute and Memorial Sloan  
10177 Kettering Cancer Center. As a result, they identified a panel of 30 genes (26 genes  
10178 with 271 recurrent or potentially recurrent missense mutations and 4 gene fusions)  
10179 which provided sensitivity of 92% at theoretical 100% specificity for detection of  
10180 PCa. Upon protocol optimization, they will first complete a pilot study and sequence  
10181 cell-free DNA in 24 SP samples from men with PCa, 12 seminal plasma (SP) samples  
10182 from men with a negative biopsy and 12 SP samples from healthy fertile men. They  
10183 will then validate the diagnostic performance of the 30-gene panel in 288 SP  
10184 samples from men with low-grade, intermediate-grade, high-grade PCa, negative  
10185 biopsy, prostate inflammation and healthy men.

10186 They will also develop an approach for immunomagnetic isolation of prostate  
10187 epithelial cells and PCa cells from semen. They propose that PCa cells isolated from  
10188 semen may function as a non-invasive 'liquid biopsy' tool for the accurate diagnosis  
10189 and subtyping of PCa. Exfoliated prostate epithelial cells and PCa cells will be isolated  
10190 using magnetic beads coated with monoclonal antibodies or high-affinity aptamers  
10191 for the prostate-specific membrane antigen (PSMA). Since PSMA is cell-surface  
10192 protein exclusively expressed in prostate cells, this procedure will enrich prostate  
10193 epithelial cells and PCa cells, but deplete spermatozoa and leukocytes. Protocols for  
10194 cell isolation will include the use of either centrifugation or magnetic-activated cell  
10195 sorting. Genomic DNA will be extracted, purified and analyzed by the next  
10196 generation sequencing. Using semen samples from post-vasectomy semen, they will  
10197 investigate the impact of spermatozoa on the efficiency of isolation of prostate  
10198 epithelial cells.

10199  
10200 The following collaborators will also be receiving biomaterial specimens (blood  
10201 and/or urine and/or semen). The goals of each of these groups is to correlate a  
10202 biomarker readout with the likelihood of prostate cancer, and of clinically significant  
10203 cancer. The planned assays are summarized briefly as follows

- 10204
- 10205 • 3D Signatures
- 10206 MaRS Centre, South Tower  
10207 101 College Street, Suite 200  
10208 Toronto, Ontario, Canada M5G 1L7

10209  
10210 This group will be examining the telomere structure of circulating tumour cells  
10211 (CTCs) using an established assay, the Telo PC test. The results of a 50 patient  
10212 prostate cancer pilot study in men with intermediate risk prostate cancer who  
10213 underwent radical prostatectomy showed that the TeloPC assay correctly predicted  
10214 the status/aggressiveness of disease in each of the study's patients.<sup>1</sup> While all  
10215 patients were diagnosed as intermediate risk using conventional biopsies prior to  
10216 surgery, only 21 of the 50 patients who underwent RP showed disease upgrading  
10217 upon post-surgical analysis and therefore were suitable for prostate removal. The  
10218 TeloPC assay correctly predicted that 29 of the 50 patients had a stable form of  
10219 prostate cancer.

10220  
10221 The TeloPC assay includes filtration-based circulating tumour cell (CTC) enrichment  
10222 combined with 3-dimensional (3D) analysis of telomeres to obtain 3D telomere

- 
- 10223 profiles of PCa patients with low-intermediate risk category.
- 10224       • MiR Diagnostics  
10225           1 Discovery Drive  
10226           Rensselaer, NY 12144
- 10227 This group will be examining urinary microRNAs. A panel of 56 miRNAs and  
10228 snoRNAs, which have been demonstrated to be predictive of clinically significant  
10229 prostate cancer, will be interrogated.
- 10230  
10231  
10232
- 10233       • Exosome Diagnostics, Inc.  
10234           266 2 nd Ave.  
10235           Waltham, MA 02451
- 10236  
10237 This group will be interrogating non-coding RNAs extracted from urinary exosomes.  
10238 They will assay exosomal RNA for three biomarkers known to be expressed in men  
10239 with high-grade prostate cancer, using an algorithm that integrates this three-gene  
10240 signature,
- 10241
- 10242       • MDNA Life Sciences, Inc.  
10243           2054 Vista Parkway, Suite 400  
10244           West Palm Beach, FL 33411
- 10245  
10246 This group will evaluate the performance of the Prostate Mitomics test. This is a  
10247 blood-based screening test which evaluates free plasma DNA for the presence of a  
10248 mitochondrial DNA deletion. This deletion has been demonstrated to be associated  
10249 with high grade prostate cancer. Nucleic acids will be extracted from each plasma  
10250 sample using a commercially available reagent kit. The Prostate Mitomic Test is a  
10251 quantitative real-time PCR test for a 3.4kb mitochondrial DNA deletion correlated  
10252 with prostate cancer. Each sample will also be profiled for novel mitochondrial  
10253 DNA mutations using standard laboratory techniques such as quantitative real-time  
10254 PCR. Mutation frequency will be compared to clinical outcomes.
- 10255
- 10256       • Dr. Keith Jarvi/Dr. Andrei Drabovich  
10257           Murray Koffler Urologic Wellness Centre  
10258           60 Murray Street, 6/F  
10259           Toronto, ON M5T 3L9
- 10260  
10261 This group will interrogate prostatic epithelial cells in seminal fluid for the presence  
10262 of genetic alterations known to be associated with high grade prostate cancer.
- 10263
- 10264       • MDx Health. Inc  
10265           15279 Alton Parkway, Suite 100  
10266           Irvine, CA 926188
- 10267

---

10268 This group will perform the Select MDx assay, a two gene mRNA assay performed on  
10269 urine, to evaluate its performance in predicting the presence of clinically significant  
10270 prostate cancer.  
10271

### 10272 **10.13 Long-term data linkage – Permission to Contact**

10273 The cohort of men who consent to participate in this study represent a uniquely  
10274 characterized group. Their long-term outcomes will contribute to our understanding  
10275 of the epidemiology of prostate cancer beyond the questions being addressed in this  
10276 study.

10277  
10278 Permission to Contact (PTC) is a feasible mechanism to engage subjects in research  
10279 programs. This will allow researchers to contact study participants in the future to  
10280 assess their willingness to respond to questionnaires. This potentially enables  
10281 research that would complement the planned long-term follow up in terms of health  
10282 status, for obtaining information about future biopsies not included in the study, and  
10283 allow assessment of quality of life.

### 10284 **10.14 End of Study**

10285 The end of study assessment comprises an essential safety evaluation that should be  
10286 completed prior to discharging any subject from the study.

- 10287
- 10288 • Adverse events;
  - 10289 • PSA measurement;
  - 10290 • EQ-5D-5L questionnaire;
  - 10291 • An MRI in those who did NOT have a biopsy;
  - Complete CRF.

### 10292 **10.15 Risks and Benefits to Participants**

10293 An important consideration of this study is that men are being randomized to one of  
10294 two biopsy techniques when it is not known which will be more effective. Both  
10295 diagnostic tests are currently used in clinical practice at the institutions involved in  
10296 the trial. Though systematic TRUS guided biopsy could be considered standard of  
10297 care, there is enough evidence to support the concept that MRI-targeted biopsy may  
10298 be at least as effective as systematic TRUS guided biopsy[27].

#### 10299 **10.15.1 Risks to subjects**

10300 The intervention proposed in this trial (MRI-biopsy) do not offer participants any  
10301 more risk than if they underwent standard of care (systematic TRUS guided biopsy)  
10302 for the diagnosis of prostate cancer.

##### 10303 **10.15.1.1 Risk of Systematic TRUS guided biopsy**

10304 Systematic TRUS guided biopsy can be associated with discomfort, haematuria,  
10305 haematospermia and dysuria in a large proportion of subjects, which is self-resolving  
10306 (See Table 4). There is a 4% risk of systemic urosepsis[46].

10307

**10.15.1.2 Risks of MPMRI**

10308

10309

10310

10311

10312

10313

10314

10315

10316

10317

10318

10319

10320

10321

10322

10323

MRI is associated with few risks. It is a safe procedure used in everyday clinical practice (See Table 4). Small risks of allergic reactions are associated with the intravenous administration of gadolinium, the contrast agent used in MRI scans. The study uses a low molecular weight Gd chelate as a contrast agent (Gadovist, Bayer, gadobutrol – generic). This contrast agent is used routinely for contrast enhanced MRI and is approved by Health Canada. Subjects will be screened for any contraindications to Gd injection or to MRI as per current clinical Dept of Medical Imaging protocols at each institution. The commonest reported sides effects are of limited duration and mild to moderate in intensity and include headache, vasodilation, injection site pain, nausea, dizziness, rash, and dyspnea. The incidence of these are <1%. Severe life threatening reactions such as severe anaphylaxis occur very rarely, about 1:10,000-1: 100,000. These are treatable with epinephrine and steroids. The risk of death is <1:100,000. There is a known risk of nephrogenic systemic fibrosis, a potentially fatal condition in subjects with impaired renal function, with an eGFR<30ml/min/1.73m<sup>2</sup>. These subjects are ineligible for this study.

10324

**10.15.1.3 Risks of MRI-targeted biopsy**

10325

10326

10327

10328

10329

10330

10331

10332

MRI-targeted biopsy is associated with similar risks to the standard of care systematic TRUS guided biopsy. As fewer biopsy cores are being taken with MRI-targeted biopsy, the theoretical risk of adverse events associated may be less than that of systematic TRUS guided biopsy. In addition, as a proportion of men may not require a biopsy (approximately 30%) on a group level there will be reduced number of men experiencing these complications, which is one of the major advantages of an MRI-based approach.

10333

**Table 4: Adverse events associated with procedures**

10334

| Side Effect \ Procedure | Systematic TRUS guided biopsy (Standard of care)   | MRI                                                                                     | MRI-targeted biopsy                                         |
|-------------------------|----------------------------------------------------|-----------------------------------------------------------------------------------------|-------------------------------------------------------------|
| Pain / discomfort       | Some have discomfort<br>Some have pain             | Intravenous cannulation (to allow contrast administration) can cause minimal discomfort | Similar / reduced compared to systematic TRUS guided biopsy |
| Dysuria                 | Majority have dysuria (self-resolving in 2-3 days) | No                                                                                      | Similar / reduced compared to systematic TRUS guided biopsy |
| Haematuria              | Majority (self-resolving, 2-3 days)                | No                                                                                      | Similar / reduced compared to systematic TRUS guided biopsy |
| Haemospermia            | Majority (self-resolving, 1-2 weeks)               | No                                                                                      | Similar / reduced compared to systematic TRUS guided biopsy |
| Erectile dysfunction    | 30% (self resolving after 1-2 months)              | No                                                                                      | Similar / reduced compared to systematic TRUS guided biopsy |

|                                |             |                                                                                                                                                                                               |                                                             |
|--------------------------------|-------------|-----------------------------------------------------------------------------------------------------------------------------------------------------------------------------------------------|-------------------------------------------------------------|
| Urinary Tract infection        | 1-8 %       | No                                                                                                                                                                                            | Similar / reduced compared to systematic TRUS guided biopsy |
| Systemic urosepsis             | 2-4%        | No                                                                                                                                                                                            | Similar / reduced compared to systematic TRUS guided biopsy |
| Urinary retention              | 1%          | No                                                                                                                                                                                            | Similar / reduced compared to systematic TRUS guided biopsy |
| Contrast allergy               | N/A         | Rare<br>< 1 in 10000 – severe allergic reaction (breathing problems)<br>< 1 in 2000 – moderate allergic reaction (nausea and vomiting)<br>< 1 in 250 – mild allergic reaction (rash, itching) | N/A                                                         |
| Adverse effects of antibiotics | Rare<br><1% | N/A                                                                                                                                                                                           | Rare<br><1%                                                 |

10335  
10336  
10337

### 10338 **10.15.2 Benefits to subjects**

10339 Subjects enrolled in this trial will benefit from the following:

- 10340 • Subjects in both arms may benefit from receiving a diagnostic test for suspected prostate cancer and will receive further treatment if required. The research team
- 10341 will also ensure streamlined diagnostic investigations to promptly conduct the
- 10342 diagnostic test and communicate the test outcome for the subject.
- 10343
- 10344 • Subjects enrolled in the trial will benefit from the dedicated research team
- 10345 involved in their care in addition to the clinical team normally involved in their
- 10346 care.
- 10347 • Subjects will benefit from additional discussions regarding the trial, which could
- 10348 increase their understanding of prostate cancer and help them to make a more
- 10349 informed decision about their health.
- 10350 • Subjects randomized to the MRI arm may benefit by avoiding a biopsy. This will
- 10351 remove any risk of post-biopsy infection. MRI-randomized subjects may also
- 10352 benefit from a reduced probability of having a clinically insignificant prostate
- 10353 cancer diagnosed. Clinically insignificant prostate cancer is often treated
- 10354 definitively per subject preference despite the lack of evidence supporting the
- 10355 need. All definitive local therapies for prostate cancer carry the risk of peri-
- 10356 operative complications as well as long-term risk of incontinence and erectile
- 10357 dysfunction.
- 10358

---

10359 **10.16 Concomitant medications**

10360 **10.16.1 Permitted Medications**

10361 All concomitant medications taken during the study will be recorded in the CRF with  
10362 indication, dose information and dates of administration. The definition of which  
10363 medication would be considered outside the routine medical practice is up to the  
10364 discretion of the investigator. All dietary and herbal supplement usage will be  
10365 recorded in the CRF.

10366 **10.16.2 Non-Drug Therapies**

10367 Any occurrence of prostate-related surgical and/or non-surgical (or minimally  
10368 invasive) intervention during the conduct of the study will be recorded in the CRF.  
10369

10370 **11. Schedule of Study Visits**

10371 **11.1 Visit 1 (Screening/Randomization): Screening, Consent,**  
10372 **Randomization**

10373 **For all subjects enrolled in trial**

10374 Screening will occur any time following the referral of the subject. Ideally, this will be  
10375 performed as soon as possible following receipt of referral.

10376 Subjects will be consented only after they have had time to consider the study. This  
10377 may happen on the same visit as the screening visit.

10378 Randomization can happen immediately after the consent form is signed and  
10379 eligibility is confirmed.

10380

10381 Once enrolled into the study, subjects will be asked to fill out an EQ-5D-5L  
10382 questionnaire (Appendix 4), which is a validated 2-page questionnaire representing  
10383 health related quality of life. It takes approximately 2 minutes to complete. This  
10384 questionnaires should be completed at the screening visit before the subject leaves  
10385 the clinic.

10386

10387 If a subject agrees to the optional informed consent, from randomization until any  
10388 point prior to a biopsy, optional blood, urine, semen and tissue samples will be  
10389 collected for correlative studies.

10390

10391 Even if PSA testing was done prior to Visit 1, PSA should be obtained at Visit 1.

10392

10393 **11.2 Visit 2 (MRI): ARM A, for men randomized to MRI**

10394 This will occur approximately within one week of randomization. Men will receive an  
10395 MRI (see Section 10.2.)

10396 **11.3 Visit 3 (Biopsy): ARM A, MRI-Targeted Biopsy of Prostate**

10397 **For men randomized to ARM A, who have a lesion identified by MRI.** This  
10398 appointment will follow approximately one-two weeks of MRI.

10399



---

10400 Depending on local Urology service structure, an appointment for a biopsy may need  
10401 to be booked at the same time as the MRI is booked (i.e. immediately after  
10402 randomization) in order for a biopsy to occur in timely fashion. If the results of the  
10403 MRI show that a biopsy is not required, then the biopsy appointment can be used  
10404 instead of Visit 4 for follow up of results and treatment decision.

10405  
10406 Men with a positive MRI (i.e. PI-RADS score of 3-5) will receive a MRI targeted biopsy  
10407 of the prostate (see Section 10.6). Men will complete an Immediate Post Biopsy  
10408 Questionnaire (Appendix 7) ideally completed and returned immediately after a  
10409 biopsy, before the subject leaves the department.

10410  
10411 Subjects will be given a 30-day post-biopsy questionnaire to take home after biopsy  
10412 and complete as instructed on day 30 post-biopsy. This is to be returned by post or  
10413 at the 30 day follow up appointment (Visit 4). If Visit 4 is earlier than 30 days post  
10414 biopsy then this questionnaire can be given to the research team when 30 days is  
10415 finally complete. If Visit 4 is on or later than 30 days then this can be returned at the  
10416 Visit 4 appointment. As long as questionnaire is completed at 30-60 days post-  
10417 biopsy, it will be acceptable, however, the questionnaire should be completed as  
10418 close as possible to 30 days post-biopsy.

10419  
10420 At the 30-days post biopsy interval, a member of the research team will call the  
10421 subject to remind them to complete and return the 30-day questionnaires.

#### 10422 **11.4 Visit 3 (Biopsy): ARM B, for men randomized to a systematic** 10423 **TRUS-biopsy**

10424 **For men randomized to ARM B only.**

10425  
10426 Men will receive a standardized TRUS-guided biopsy(see Section 10.7.) Men will  
10427 complete an Immediate Post Biopsy Questionnaire (Appendix 7) ideally completed  
10428 and returned immediately after the biopsy.

10429 Subjects will be given a 30-day post-biopsy questionnaire to take home after biopsy  
10430 and it is to be completed as instructed on day 30 post-biopsy. This is to be returned  
10431 by post or at the 30 day follow up appointment (Visit 4). If Visit 4 is earlier than 30  
10432 days post biopsy then this questionnaire can be given to the research team when 30  
10433 days is reached. If Visit 4 is on or later than 30 days then this can be returned at the  
10434 Visit 4 appointment. As long as the questionnaire is completed at 30-60 days post-  
10435 biopsy, it will be acceptable, however the questionnaire should be completed as  
10436 close as possible to 30 days post-biopsy.

10437  
10438 At 30-days post biopsy a member of the research team will call the subject to remind  
10439 them to complete and return the 30-day questionnaires.

#### 10440 **11.5 Visit 4 (Post-test follow up): ARM A, for men who did not receive a** 10441 **biopsy**

10442 This appointment will include a follow up meeting with the investigator to discuss  
10443 the results of the MRI as well as treatment decisions. This follow up should occur

---

10444 after the availability of the MRI report. At this visit the subject will also complete a  
10445 30-day post intervention EQ-5D-5L Questionnaire.  
10446  
10447 Subjects will complete a Post-MRI 30-day questionnaire (Appendix 8), which has been  
10448 posted to them by the research team. If Visit 4 is earlier than 30 days post MRI then  
10449 this questionnaire can be given to the research team when 30-days is finally  
10450 complete. If Visit 4 is on or later than 30 days then this can be returned at the Visit 4  
10451 appointment. As long as the questionnaire is completed at 30-60 days post-MRI, it  
10452 will be acceptable, however the questionnaire should be completed as close as  
10453 possible to 30 days post-MRI.  
10454  
10455 At 30-days post MRI, a member of the research team will call the subject to remind  
10456 them to complete the 30-day questionnaires.

10457 **11.6 Visit 4 (Post-test follow up): For all men who received a biopsy**

10458 This appointment will include a follow up meeting with the investigator to discuss  
10459 the results of the biopsy as well as treatment decisions. This should be completed as  
10460 soon as possible following the availability of any pathology results. The follow up  
10461 appointment should be within 1 month of the biopsy. Depending on local Urology  
10462 service structure, these results may need to be discussed at an MDT meeting to  
10463 inform treatment decision.  
10464

10465 The research team should record the treatment decision in the subject file.  
10466

10467 Possibilities for treatment decision include but are not limited to:

- 10468 • Further diagnostic test (e.g. PSA, biopsy, MRI)
  - 10469 • Active Surveillance
  - 10470 • Radical treatment (e.g. radical prostatectomy, radical radiotherapy)
  - 10471 • Focal therapy (e.g. high intensity focused ultrasound, cryotherapy)
  - 10472 • Hormone therapy
- 10473

10474 At this visit the subject will also receive a 30-day post intervention EQ-5D-5L  
10475 Questionnaire to complete. Subjects will also complete a 30-day Post Biopsy  
10476 questionnaire (Appendix 8), which has been posted to them by the research team.  
10477 The questionnaire needs to be completed on the 30<sup>th</sup> day post-intervention (i.e. post  
10478 biopsy). However it will be accepted if completed up to 72 hours prior to or after the  
10479 30<sup>th</sup> day. A telephone reminder from the research team to the subject can take  
10480 place.  
10481

10482 **11.7 Visit 5 (6 month follow up):26 week follow up**

10483 All subjects will have a 26 week visit

10484 Subjects will have the following:

- 10485 • Vitals, DRE
- 10486 • PSA
- 10487 • Optional sample collection (blood)

---

10488 **11.8 Visit 6 (1 year follow up): 52 week follow up**

10489 All subjects are planned to have a 52 week follow up visit.

10490 Subjects will be followed to obtain the following information on an annual basis:

- 10491 • Vitals, DRE
- 10492 • time to cancer diagnosis;
- 10493 • Gleason score progression;
- 10494 • time to intervention on active surveillance;
- 10495 • time on active surveillance;
- 10496 • results of PSA tests.
- 10497 • Time to follow up biopsy and/or mpMRI if performed (see follow up
- 10498 guidelines)
- 10499 • Indication for follow up biopsy
- 10500 • Was MRI performed prior to follow up biopsy
- 10501 • Was the biopsy systematic, targeted only or both systematic + targets, not
- 10502 done because of negative MRI
- 10503 • Optional sample collection (blood, urine)

10504

10505 Those subjects randomized to ARM A but who did not have an MRI-targeted biopsy  
10506 will have an additional MRI at Visit 6 (year 2).

10507 **11.9 Visit 7 (18 month follow up): 78 week follow up**

10508 All subjects will have a 78 week visit

10509 Subjects will have the following:

- 10510 • Vitals, DRE
- 10511 • PSA
- 10512 • Optional sample collection (blood)

10513

10514 **11.10 Visit 8 (2 year follow up): End of study**

10515 All study participants will be followed for up to two years or until they undergo  
10516 radical treatment

10517 Subjects will be followed to obtain the following information on an annual basis:

- 10518 • Vitals, DRE
- 10519 • time to cancer diagnosis;
- 10520 • Gleason score progression;
- 10521 • time to intervention on active surveillance;
- 10522 • time on active surveillance;
- 10523 • results of PSA tests.
- 10524 • Optional sample collection (blood, urine)
- 10525
- 10526 • Time to follow up biopsy and/or mpMRI if performed (see follow up
- 10527 guidelines)
- 10528 ○ Indication for follow up biopsy
- 10529 ○ Was MRI performed prior to follow up biopsy

---

10530                   ○ Was the biopsy systematic, targets only or both systematic + targets,  
10531                   not done because of negative mpMRI

10532

10533

10534   Follow-up will cease once treatment beyond active surveillance is undertaken  
10535   (prostatectomy, radiation therapy, focal therapy, etc.).

10536

10537   Those subjects randomized to ARM A but who did not have an MRI-targeted biopsy  
10538   will have an additional MRI at Visit 8.

10539

## 10540   **12. Randomization**

### 10541   **12.1 Randomization Procedure**

10542   Written informed consent will be obtained from all eligible subjects prior to  
10543   commencing any study related procedures. The Ontario Clinical Oncology Group  
10544   (OCOG) Coordinating and Methods Centre (CMC) located at the Research Centre,  
10545   Juravinski Hospital and Cancer Centre, Hamilton, Ontario will centrally coordinate  
10546   subject randomization. Subjects will be allocated to the two treatment arms in an  
10547   approximate 1:1 ratio by use of a dynamic allocation scheme[47].

10548

10549   After documentation of written informed consent and confirmation of subject  
10550   eligibility, clinical centres will randomize the subject by accessing the CMC's web-  
10551   based Interactive Registration/Randomization System (IRIS). Prior to randomization  
10552   and treatment allocation, the subjects' individualized risk of high-grade prostate  
10553   cancer, obtained using the PCPTRC 2.0 calculator found at  
10554   <http://deb.uthscsa.edu/URORiskCalc/Pages/calcs.jsp> must be determined.

### 10555   **12.2 Stratification**

10556   Eligible, consenting subjects will be stratified by: (1) individualized risk of high-grade  
10557   prostate cancer (5% to 25%, >25%); and (2) clinical centre

### 10558   **12.3 Blinding and measures taken to avoid bias**

10559   This study is unblinded, and all subjects will be aware of the treatment that they are  
10560   receiving. As the MRI scan is unique to one of the arms it will not be possible to blind  
10561   the participants or investigators as to what intervention is being received. Therefore,  
10562   participants will be informed which arm they have been allocated to. Where  
10563   possible, the data will be coded so as to blind individuals analyzing the data from  
10564   which of the groups the data was from. Summary details of randomized allocation  
10565   and outcomes will not be made available (unless specifically authorized by the Trial  
10566   Steering Committee and/or Data Monitoring Committee) in order to maintain the  
10567   overall blind of the trial.

10568

10569   Radiologists will be blinded to subject information. (e.g. PSA level Radiologists will be  
10570   aware that the subject is part of the trial.

10571   Pathologists will be blinded to the cohort allocation. Concealment may be  
10572   challenging due to the different number of cores in the two groups, but this is  
10573   unavoidable. This is unlikely to represent a significant source of bias.

10574

10575

10576 **13. Data**

10577

10578 Type of data to be collected:

- 10579 • EQ-5D–5L questionnaires. These will measure quality of life and which will be
- 10580 measured at specific times throughout the trial.
- 10581 • Systematic TRUS guided biopsy– pathology – categorical (e.g. Gleason grade) and
- 10582 continuous data
- 10583 • MRI – diagram representing MRI; categorical data for areas and scores of
- 10584 suspicion (e.g. Sector 1p, score of suspicion 4/5)
- 10585 • MRI-targeted biopsy – pathology – categorical (e.g. Gleason grade) and
- 10586 continuous data
- 10587 • Post-biopsy immediate and 30-day questionnaires – categorical data (e.g. fevers
- 10588 yes/no)
- 10589 • Treatment decisions – categorical data (e.g. radical treatment)
- 10590 • PSA – continuous data (e.g. value of PSA in ng/ml)

10591

10592 Please see **Appendix1** for the time window for data collection.

10593

10594 **14. Statistical Considerations**

10595 **14.1 Sample Size Calculation**

10596 **STATISTICAL methods**

10597 **Primary Analysis**

10598 Absolute differences in the proportion of clinically significant cancer detected

10599 between arms will be calculated and compared using the Clopper-Pearson method.

10600 If the lower boundary of an one-sided, 97.5% confidence interval for the difference

10601 in detection rates of MPMRI-TB compared to systematic TRUS guided biopsy is less

10602 than -5% then MPMRI-TB will be deemed non-inferior. In the event that the lower

10603 bound is greater than zero, superiority can be claimed.

10604

10605 A supportive analysis will be performed by using a logistic regression model,

10606 evaluating the odds ratio for detecting high grade cancers, adjusted for stratification

10607 factors. MRI-guided biopsy would be considered non-inferior if the lower bound of

10608 the two-sided, 95% confidence interval for the odds ratio exceeds 0.78. This lower

10609 bound was calculated to approximate an absolute 5% difference of interest (NOTE:

10610 the unadjusted odds ratio is 0.78 when treatment A is 30% and treatment B is 25%).

10611

10612 **Secondary Analyses**

10613 For each secondary outcome, where appropriate, a difference in proportions with

10614 95% CI, or a difference in means with 95% CI, as appropriate, will be presented.

10615 Differences in the 1-year and 2-year rates along with 95% CI will be calculated for

10616 time-to-event outcomes.

10617

---

10618  $\chi^2$  tests, t-tests or Wilcoxon rank sum tests, and log-rank tests will be used to test for  
10619 differences between allocation arms in secondary outcomes. Logistic regression and  
10620 Cox proportional hazards regression will be used to examine the effect of allocation  
10621 arm on outcomes, adjusted for stratification factors. All secondary outcomes will be  
10622 two-sided and statistical significance will be set at the  $\alpha=0.05$  level. No statistical  
10623 adjustments will be made due to multiple testing, however, results for secondary  
10624 outcomes will be interpreted cautiously, acknowledging that tests were performed  
10625 on secondary outcomes and numerous secondary tests were performed. Figures and  
10626 tables will be used to illustrate results of interest.

10627

### 10628 **Treatment Allocation and Stratification**

10629 Subjects will be allocated to the two allocation arms in an approximate 1:1 ratio by  
10630 use of a dynamic allocation scheme. Specifically, the first 20 subjects will be  
10631 randomly allocated to arm in an approximate 1:1 ratio. After the first 20 subjects, a  
10632 biased coin method will be used, whereby the number of subjects within each  
10633 stratum will be calculated, and the next eligible subject will be allocated (with  
10634 probability  $p=0.8$ ) to the arm which reduces the imbalance. If no imbalance exists,  
10635 allocation to each arm will occur with probability  $p=0.5$ .

10636

#### 10637 Stratification

10638 For treatment allocation, the subjects' individualized risk of high-grade prostate  
10639 cancer will be determined. Risk will be assessed using the PCPTRC 2.0 calculator,  
10640 found at <http://deb.uthscsa.edu/URORiskCalc/Pages/calcs.jsp>. Eligible, consenting  
10641 subjects will be stratified by:

- 10642 (1) individualized risk of high-grade prostate cancer (5% to 25%, >25%);
- 10643 (2) clinical centre.

10644

#### 10645 **Sample Size**

10646 Rates of clinically significant cancer (Gleason  $\geq 7$ ) detection from targeted-alone  
10647 biopsy in a population with no prior biopsy have been shown to be 42% [37] and  
10648 50% from another study [36].

10649

10650 Rates of clinically significant cancer detection from one the largest studies of  
10651 systematic TRUS guided biopsy in men without prior biopsy are shown to be 27%  
10652 [49]. Therefore, based on these results, it may be assumed that targeted-biopsy will  
10653 detect clinically significant cancer in >15% more men (i.e. 42% versus 27%) than  
10654 systematic TRUS guided biopsy.

10655

10656 For this study, it will be conservatively hypothesized that systematic TRUS guided  
10657 biopsy will detect clinically significant cancer in 30% of men, and targeted biopsy will  
10658 detect clinically significant cancer in 10% more men (i.e. 40% total) than systematic  
10659 TRUS guided biopsy. For the non-inferiority hypothesis, using 90% power and 2.5%  
10660 one sided-alpha, assuming a targeted biopsy detection rate of clinically significant  
10661 cancer of 40%, and a detection rate for systematic TRUS guided biopsy of 30% and  
10662 using a margin of clinical unimportance of 5%, 211 men per arm will be required. The  
10663 choice of 5% as the margin of non-inferiority represents a difference that would be  
10664 considered clinically important.

10665

---

10666 Thus total men required in study = **422**.

10667

10668 To account for potential withdrawal / loss to follow up and the effect of  
10669 stratification, the sample size will be inflated by 5%, and a target of **450 men** will be  
10670 recruited.

10671

10672 Note that the rate of clinically significant cancers is very dependent on the  
10673 population registered for this study. It is possible that fewer (or more) subjects will  
10674 have clinically significant cancers than what is initially hypothesized. However, if the  
10675 population rate of clinically significant cancers is less (i.e. the systematic TRUS guided  
10676 biopsy detection rate is <30%) and other statistical assumptions remain as stated  
10677 previously, the statistical power will increase. The minimum statistical power would  
10678 be obtained if the clinically significant cancer detection rate was 45% for systematic  
10679 TRUS guided biopsy and 55% for targeted biopsy, which would still achieve >84%  
10680 power. Therefore, the sample size is sufficient to ensure non-inferiority, even if the  
10681 rate of clinically significant cancer in the population is miss-specified, assuming an  
10682 absolute difference of 10% between targeted and systematic TRUS guided  
10683 biopsydetection rates, and a 5% margin of non-inferiority.

10684

#### 10685 **Statistical Conventions**

10686 For categorical data, tables will be presented showing the n and percentage  
10687 (n/N\*100%) of subjects. Analyses will be presented by study allocation arm  
10688 separately.

10689

10690 Duration of time will be described in either years, months or weeks, and calculated  
10691 using: (last date – first date + 1) / X, where X=365.25 for years, X=30.4 for months, or  
10692 X=7 for weeks. Example: Age (in years) will be calculated as: (randomization date –  
10693 date of birth + 1)/365.25.

10694

10695 Transformations of the data in order to meet statistical assumptions may be  
10696 considered. Type-1 error will be set to 5%. Standard diagnostic tools will be used to  
10697 assess any of the model fittings. All the statistical analysis will be carried out using  
10698 SAS version-9 and over for Windows (Cary, NC) or R version 3.2.2. (www.r-  
10699 project.org) or higher.

10700

#### 10701 **Missing Data**

10702 Missing values for the primary endpoint will be examined closely. Sources and  
10703 reasons for the absence of data incurred as a result of subjects lost-to-follow up,  
10704 dropouts, and intermittent missing values will be described and explored by various  
10705 summary statistics as well as graphical displays between the two allocation arms.  
10706 Subjects' lost-to-follow up or dropouts will be explored and the characteristics of  
10707 those subjects will be described by allocation arm and tested using Fisher's exact  
10708 tests or Wilcoxon rank sum tests.

10709

10710 Missing data for secondary endpoints will be described. The methods for evaluating  
10711 missing data of the primary endpoint may be employed for endpoints of interest. For  
10712 summarization of baseline data, the following conventions will be used for partial  
10713 missing date information occurring prior to randomization (e.g. for medical history

---

10714 or prior treatment). If year is missing, the date will be set at missing. If year is  
10715 available, but month and date is missing, the month and date will be set to July 1<sup>st</sup> of  
10716 the respective year. If date is missing, but year and month available, the day will be  
10717 set to the 15<sup>th</sup> of the respective month.

## 10718 **14.2 Interim Analyses**

10719

10720 The Trial Steering Committee (TSC), Data Safety and Monitoring Committee (DSMC)  
10721 or Trial PI may recommend cessation of the trial or suggestion modifications to trial  
10722 conduct if there are concerns about subject safety or futility. Unless otherwise  
10723 specified by one of these bodies, a futility analysis will be performed after  
10724 approximately 200 subjects are enrolled and have their primary outcome  
10725 ascertained. Simulation will be used to estimate the conditional probability of futility  
10726 assuming the study was to continue to completion, and assuming the clinically  
10727 significant cancer detection rate is 30% in both arms. If the conditional probability is  
10728 0.95 or higher that continuation of the study will result in a negative result, the  
10729 DSMC will recommend a suspension of recruitment to the trial, and initiation of a  
10730 quality assurance review. A decision to permanently close the study or continue with  
10731 accrual will be determined by the Steering Committee, based on the results of the  
10732 quality assurance review, and the recommendation of the DSMC.

10733

### 10734 **Timing of Final Analysis**

10735 A single, final, analysis will occur after all subjects have undergone their initial biopsy  
10736 and all data related to the initial biopsy is documented and validated. Follow-up  
10737 analyses will be conducted after all subjects have completed two years of follow-up.

## 10738 **14.3 Populations:**

10739 The per protocol, study population will consist of all subjects who satisfy all eligibility  
10740 criteria and are randomized to the study, who undergo MPMRI-TB or systematic  
10741 TRUS guided biopsy and have their primary outcome measured. This population will  
10742 be used for the primary analysis of non-inferiority.

10743 The intent-to-treat (ITT) population will consist of all subjects randomized to the  
10744 study, regardless of any protocol violations or if they do not complete the study as  
10745 defined in the protocol. The ITT population will be used as a supportive analysis of  
10746 the primary analysis, for all safety analyses, and for any analysis investigating  
10747 superiority.

## 10748 **14.4 Primary Outcome**

### 10749 **14.4.1 Detection rate of clinically significant cancer**

10750 The proportion of men in each arm with clinically significant cancer (Gleason  $\geq 7$ ) will  
10751 be calculated based on histology results from biopsy procedures. Analysis will be on  
10752 the intention to treat population.

10753

10754 Absolute differences in proportion of clinically significant cancer detected between  
10755 arms will be calculated and compared. If the lower boundary of the 97.5%  
10756 confidence interval for the difference in detection rates of MPMRI-TB compared to



---

10757 systematic TRUS guided biopsy is less than -5% then MPMRI-TB will be deemed non-  
10758 inferior. In the event that the lower bound is greater than zero, superiority can be  
10759 claimed.

10760

10761 The primary analysis will be conducted once all subjects have completed visit 4,  
10762 when the results of the biopsy or MRI are given to the subject.

10763

## 10764 **14.5 Secondary Outcomes**

10765 For each secondary outcome, where appropriate, a difference in proportions with  
10766 95% CI, or a difference in means with 95% CI, as appropriate, will be presented.

10767

### 10768 **14.5.1 Proportion of men in each arm with clinically insignificant 10769 cancer detected**

10770 The proportion of men in each arm with clinically insignificant cancer (Gleason <7)  
10771 will be calculated based on histology results from biopsy procedures. In addition, the  
10772 numbers with clinically insignificant cancer identified by MRI alone will also be  
10773 included.

10774

### 10775 **14.5.2 Proportion of men in each arm with Gleason $\geq 4+3$ detected**

10776 The proportion of men in each arm with Gleason  $\geq 4+3$  will be calculated based on  
10777 histology results from biopsy procedures. In addition, the numbers with clinically  
10778 insignificant cancer identified by MRI alone will also be included.

10779

### 10780 **14.5.3 Proportion of men in MPMRI arm who avoid biopsy.**

10781

### 10782 **14.5.4 Proportion of men in the MRI arm whom the PI-RADS score for 10783 suspicion of clinically significant cancer was 3, 4 or 5 but no clinically 10784 significant cancer was detected.**

10785 The proportion of men in each arm whom the PI-RADS score for suspicion of  
10786 clinically significant cancer was 3, 4 or 5 but no clinically significant cancer was  
10787 detected, will be calculated based on histology results from biopsy procedures.

10788

### 10789 **14.5.5 Proportion of men in each arm who go on to definitive local 10790 treatment (e.g. radical prostatectomy, radiotherapy, brachytherapy) or 10791 systemic treatment (e.g. hormone therapy, chemotherapy)**

10792

10793

10794

### 10795 **14.5.8 Proportion of men with a negative MRI who progress within 24 10796 months after their study MRI, or who are upgraded within 24 months**

10797 Men with a negative MRI who do not undergo a biopsy will have a follow-up MRI 2  
10798 years after their study MRI. We will determine the proportion of men whose  
10799 subsequent MRI shows a PI-RADS 3 or greater lesion. The results of targeted biopsy

---

10800 of those lesions will be recorded and analyzed. The number of men who are  
10801 upgraded to Gleason  $\geq 7$  due to an off-protocol biopsy will also be recorded.  
10802

#### 10803 **14.5.9 Proportion of men with post-biopsy adverse events**

10804 Immediate post-biopsy discomfort and pain will be characterized by intensity using  
10805 the numerical analogue score. Scores for each arm will be compared. 30-day biopsy  
10806 specific complications and adverse events will be characterized according to their  
10807 presence, absence, duration and how much of a problem the symptoms caused the  
10808 subject. Whether the subject had contact with health care providers/system will also  
10809 be recorded. The proportion of individuals experiencing each symptom, proportion  
10810 in whom that symptom caused a problem and proportion who had contact with  
10811 healthcare providers/system will be calculated and compared qualitatively between  
10812 arms utilizing classification systems validated in previous studies [39]. The biopsy  
10813 specific complications that will be compared include pain, urinary retention, fever,  
10814 pain, erectile dysfunction, urinary incontinence, haematuria, haematochezia  
10815 and haematospermia.

10816  
10817 Any post-biopsy complications up to 30-days post biopsy procedure will be tabulated  
10818 and listed by duration and management.  
10819

#### 10820 **14.5.10 Health related quality of life**

10821 EQ-5D-5L descriptive domain summary indices and visual analogue scores will be  
10822 assessed at baseline, at 2 years and changes will be compared between arms.  
10823

10824 EQ-5D was selected as a simple, low burden quality of life instrument that will  
10825 provide validated information on symptoms, particularly anxiety, that could be  
10826 compared across disease states and studies. Other subject-reported outcomes  
10827 directly linked to the interventions will be captured in the post-biopsy surveys. Since  
10828 it provides utilities, these will be incorporated into a secondary economic analysis if  
10829 the results permit.  
10830

#### 10831 **14.5.11 Proportion Gleason score upgrading in men undergoing radical 10832 prostatectomy**

10833 Of the men who undergo radical prostatectomy, the proportion who have cancer  
10834 upgraded from the biopsy histopathology to the radical prostatectomy  
10835 histopathology in each arm will be calculated and compared.  
10836

#### 10837 **14.5.12 Cost Outcomes**

10838 As the study design for clinical outcomes is one of non-inferiority, the primary  
10839 economic analysis will be **cost minimization analysis**. The perspective of the  
10840 economic analysis will be that of the public payer. The primary goal of the analysis  
10841 will be to support arguments for public funding. Thus the costs of participant  
10842 burden, logistical challenges, and expense of obtaining societal costs, will not be  
10843 evaluated.  
10844

##### 10845 **14.5.12.1 Data collection:**

---

10846 As part of the informed consent process, participants in Ontario will also  
10847 consent to having their Ontario Health Insurance Number recorded, to be  
10848 later transferred to the Institute for Clinical Evaluative Sciences (ICES) where  
10849 it will be linked to a number of administrative claims databases recording  
10850 health system resource utilization such as physician billing [Ontario Health  
10851 Insurance Plan (OHIP); laboratory and diagnostic tests (OHIP); hospitalization  
10852 and surgery [Discharge AbstractDatabase (DAD)]; medications [Ontario Drug  
10853 Benefit (ODB) Formulary, New Drug Funding Program (NDFP), and Activity  
10854 Level Reporting (ALR)]; clinic and emergency department visits [National  
10855 Ambulatory Care Reporting System (NACRS), Emergency Department visits];  
10856 radiation (ALR); homecare (Home Care databases) and a few additional ones  
10857 as determined necessary (e.g., Long-term care, Mental Health, Diabetes. The  
10858 overall, number and proportion of health system resources will be  
10859 determined. In this way we can capture comprehensive resource utilization  
10860 related to on-trial management including any adverse events.

#### 10861 **14.5.12.2 Health Insurance number handling and security**

10862 As the economic implications of this study are of prime importance to some  
10863 of the funders, the request for data linkage will be part of the main consent  
10864 form. If a participant indicates to the study team that they decline or  
10865 withdraw consent, the OHIP number will be recorded as 9999-999-999-XX.  
10866 The OHIP numbers will stay with the participating institution until after  
10867 accrual is complete, and then they will all be transferred at one time under  
10868 data sharing agreements between ICES and each institution. Data will be  
10869 transferred using a secure electronic file transfer system established by ICES  
10870 and managed by authorized ICES personnel responsible for receiving  
10871 data. The file transfer system uses security safeguards including encryption  
10872 and authentication.

10873  
10874 ICES is a Prescribed Entity under the Personal Health Information Protection  
10875 Act (PHIPA), and can receive and use personal health information for  
10876 purposes of analysis and compiling statistical information and other research.  
10877 Its policies and procedures for privacy protection and data security have been  
10878 approved by Ontario's Privacy Commissioner. ICES is a secure facility, video-  
10879 monitored and requiring passkeys to access private offices and  
10880 computers. ICES has extensive experience in the protection of confidentiality  
10881 when using such data. It has a UNIX-based network that cannot be accessed  
10882 externally. ICES data facilities are fully 'moated' (no connections to other  
10883 computers). At ICES, routine procedures for data backup are instituted by a  
10884 data management team. The data is burned onto a CD or placed on an  
10885 external hard drive and placed in a locked vault. All ICES staff and scientific  
10886 affiliates are required to sign agreements of confidentiality annually. Internal  
10887 audits are conducted to monitor compliance with ICES policies, standards and  
10888 procedures.

10889  
10890 Study data with direct personal identifiers such as OHIP numbers will  
10891 reside on a dedicated and secure server at ICES and will only be  
10892 accessible by a named Data Covenantor. The Covenantor will encode

---

10893 the OHIP number, replacing it with an ICES key number (IKN) (a code)  
10894 and transferring it to a “moated” server for the study project. (The  
10895 Data Covenantor is an ICES person named in our data sharing  
10896 agreements and identified to the Office of the Information and  
10897 Privacy Commissioner, who can access personal health information at  
10898 ICES for the purposes of receiving, coding, transferring or destroying  
10899 personal health information.) The coded study data will only be made  
10900 available to the Principal Investigator and project staff directly  
10901 responsible for data analysis (under the supervision of the  
10902 investigator). No subject, physician or institution will be identified in  
10903 the reporting of results  
10904

### 10905 **14.5.12.3 Cost calculation**

10906 Once the utilization of health services is determined from those cases linked  
10907 to administrative databases, publicly available costs (2016\$CAN) will be  
10908 applied to health services. Costs for physician and laboratory services will be  
10909 determined by applying that year’s fee code. Costs for hospital care will be  
10910 estimated using the Canadian Institute for Health Information (CIHI) Resource  
10911 Intensity Weight method for the most recently available year. Outpatient  
10912 prescription drug costs for participants not covered by ODB (those under age  
10913 65 and not on social assistance) will be considered to be the same as the trial  
10914 arm-specific average for those with coverage. Costs will then be inflated  
10915 using the healthcare-specific Consumer Price Index reported by Statistics  
10916 Canada into constant Canadian dollars for the year the study ends. Due to the  
10917 short time horizon, discounting will not be applied.

### 10918 **14.5.12.4 Primary Analysis**

10919 A within-trial analysis will be conducted to calculate the total cost for each  
10920 arm and mean cost per subject for each arm. Frequency distributions and  
10921 measures of central tendency (e.g. means and medians) will be determined  
10922 for each resource category (e.g. hospitalizations) for each arm of the study.  
10923 Confidence intervals for the difference in costs and resource utilization  
10924 between the strategies overall and for each resource category will also be  
10925 calculated. Univariate comparisons between the groups will be made  
10926 primarily using nonparametric tests, such as Wilcoxon rank-sum test. In the  
10927 primary analysis, assuming equivalence in the primary outcome, an arm with  
10928 significantly lower mean costs will be considered the economically most  
10929 attractive approach.

10930  
10931 Should the clinical trial find a difference between the two arms on the  
10932 primary endpoint, an incremental cost-benefit analysis will be calculated by  
10933 deriving the additional cost per case of clinically significant cancer diagnosed,  
10934 according to the following equation:

10935

$$\text{Cost-benefit} = \frac{\text{Cost}_{(\text{Arm A})} - \text{Cost}_{(\text{Arm B})}}{\quad}$$

10936 The cost of avoiding each additional case of clinically insignificant cancer  
10937 diagnosed may also be similarly calculated. Consideration will be given to  
10938 extending this analysis using economic modeling with incorporation of utility  
10939 values from the EQ-5D to allow a lifetime perspective to be taken and the  
10940 estimation of quality adjusted life years (QALYs).

#### 10941 **14.5.12.5 Secondary Cost Analyses**

10942 One and multi-way sensitivity analyses will be carried out around major cost  
10943 drivers by varying the costs over their observed ranges and conducting  
10944 threshold analyses where appropriate. Sensitivity analyses will also be  
10945 performed to evaluate potential limitations in the data, such as ODB costs as  
10946 described above (though the proportion without ODB coverage should be  
10947 similar in the two arms, and it is not expected to be a major cost-driver).

10948

10949

10950

#### 10951 **14.5.13 Missing Data**

10952 The impact of missing data will be explored in all analyses; sensitivity  
10953 analyses/multiple imputation will be performed as appropriate.

10954

### 10955 **15. Participant compliance and withdrawal**

10956

10957 The study will be completed when at least 422 subjects have been randomized, have  
10958 undergone a diagnostic test and completed follow up. Compliance to randomized  
10959 treatment will be assessed by monitoring the completed forms, e.g. the systematic  
10960 TRUS guided biopsy form or the MRI-targeted biopsy form.

10961

10962 In consenting to the study, subjects are consenting to study monitoring, imaging and  
10963 biopsy procedures, follow-up, data collection and analysis. Subjects are allowed to  
10964 withdraw consent at any stage and their care will not be affected in any way. All  
10965 communication surrounding the withdrawal and its reasons should be noted in the  
10966 subject's record. Such cases should be reported to the PRECISE Study Operations  
10967 Office. Data up to the time of withdrawal can be included in the study.

10968

10969 As the study diagnostic tests are for suspected cancer it is not anticipated that there  
10970 will be significant loss to follow up.

10971

#### 10972 **15.1 Subject Withdrawal from Study**

10973 A subject may discontinue participation in this study at any time at the investigator's  
10974 discretion or at the request of the subject.

10975

10976 If a subject discontinues at or before Visit 1 (randomization), he is not required to  
10977 complete end of study assessments.

10978

---

10979 If a subject discontinues after Visit 1 (randomization) for any reason, the investigator  
10980 should make every effort to complete the activities bulleted below.  
10981  
10982 • End of study assessments as outlined in **Section 10.17**.  
10983 • Any occurrence of death, prostatic surgical intervention, non-surgical treatment  
10984 for prostate cancer after study withdrawal should be documented in the CRF and  
10985 source documents.  
10986  
10987 Subjects who are discontinued from the study after randomization will not be  
10988 replaced. Subjects withdrawn from the study retain their subject number if already  
10989 given. New subjects will be allocated a new subject number.  
10990  
10991 In the event that a subject is prematurely discontinued from the study at any time  
10992 due to an AE, the procedures describe in **Section 16.3** must be followed.  
10993  
10994 Subjects should be withdrawn from the study for any of the following criteria:  
10995 • Non-compliance with the requirements of the study.  
10996 • Request to discontinue treatment. This request can be made by either the  
10997 subject or the investigator.  
10998 • Develops progressive disease.  
10999

## 11000 **15.2 Study completion**

11001 The primary end point will be reached when the last subject entered has their  
11002 systematic biopsy or MRI and targeted biopsy if indicated. All subjects will be  
11003 followed for up to 2 years following study entry or until they have radical treatment.  
11004 Subjects who are found to have significant prostate cancer and are treated will not  
11005 be included in follow up for this period. This includes subjects diagnosed as part of  
11006 study protocol, and subjects diagnosed during the follow up period by standard-of-  
11007 care procedures. However, post MRI/biopsy questionnaires will not be required  
11008 following non-protocol based procedures.  
11009

## 11010 **16. Data Monitoring, Quality Control and Safety**

### 11011 **16.1 Stopping / discontinuation rules**

11012 The study will be completed when 450 participants have been randomized,  
11013 undergone a diagnostic test and completed follow up.  
11014

11015 The Trial Steering Committee (TSC), Data Safety and Monitoring Committee (DSMC)  
11016 or Trial PI may recommend cessation of the trial or suggestion modifications to trial  
11017 conduct if there are concerns about subject safety or futility. See Section 14.2.1 for  
11018 further details on the interim analysis. Appropriate documentation as per the PI's  
11019 requirement will be completed if stopping the trial is necessary and the ethics  
11020 committee will be informed.  
11021

11022 As the study is unblinded there will be no need for randomization code breaks.  
11023

---

11024 **16.2 Monitoring, quality control and assurance**

11025

11026 Members of the trial team will be Good Clinical Practice (or equivalent) trained.

11027

11028 An independent DSMC will be appointed to monitor subject safety and the rate of  
11029 recruitment of subjects in the study. They will meet at least once a year whilst the  
11030 trial is ongoing for routine review of safety data and trial progression. They have the  
11031 power to call additional meetings and review data at any point in the trial should  
11032 they wish to do so.

11033

11034 The PI may also arrange an independent trial monitor to review the study data.

11035 **16.3 Assessment of safety**

11036 The investigator is responsible for the detection and documentation of events  
11037 meeting the criteria and definition of an AE or SAE as provided in this protocol.

11038 During this study, when there is a safety evaluation, the investigator or site staff will  
11039 be responsible for detecting AEs and SAEs, as detailed in this section of the protocol.

11040 **16.3.1 Definition of an Adverse Event (AE)**

11041 Adverse events (AE) will be defined as “any untoward medical occurrence in a  
11042 clinical trial subject undergoing any intervention in the trial, which does not  
11043 necessarily have a causal relationship with this treatment”.

11044

11045 Only adverse events specific to biopsy-related complications including pain, fever,  
11046 hematuria, hematochezia, hematospermia, urinary retention and urinary  
11047 incontinence will be recorded. Any other adverse events will not be recorded. Please  
11048 refer to section 16.3.6 of the protocol.

11049 **16.3.2 Definition of a Serious Adverse Event (SAE)**

11050 Serious adverse events (SAE) will be defined as “any untoward medical occurrence as  
11051 a result of any intervention in the trial that:

11052 **(a) results in death**

11053 **(b) is life-threatening**

11054 The term ‘life-threatening’ in the definition of ‘serious’ refers to an event in which  
11055 the subject was at risk of death at the time of the event. It does not refer to an  
11056 event, which hypothetically might have caused death, if it were more severe.

11057 **(c) requires hospitalisation or prolongation of existing hospitalisation**

11058 In general, hospitalization signifies that the subject has been detained (usually  
11059 involving at least an overnight stay) at a hospital or emergency ward for observation  
11060 and/or treatment that would not have been appropriate in the physicians’ office or  
11061 outpatient setting. Complications that occur during hospitalization are AEs. If a  
11062 complication prolongs hospitalization or fulfils any other serious criteria, the event is  
11063 serious. When in doubt as to whether ‘hospitalization’; occurred or was necessary,  
11064 the AE should be considered serious. Hospitalization for elective treatment of a pre-  
11065 existing condition that did not worsen form baseline is not considered an AE.

11066 **(d) results in disability / incapacity**

---

11067 The term disability means substantial disruption of a person’s ability to conduct  
11068 normal life functions. This definition is not intended to include experiences of  
11069 relatively minor medical significance such as uncomplicated headache, nausea,  
11070 vomiting, diarrhea, influenza and accidental trauma (e.g. sprained ankle) which may  
11071 interfere or prevent everyday life functions but do not constitute a substantial  
11072 disruption.

11073 **(e) is a congenital abnormality/birth defect.**

11074 Medical or scientific judgement should be exercised in deciding whether reporting is  
11075 appropriate in other situations, such as important medical events that may not be  
11076 immediately life threatening or result in death or hospitalization but may jeopardise  
11077 the subject or may require medical or surgical intervention to prevent one of the  
11078 outcomes listed in the above definition. These should also be considered serious.  
11079 Examples of such events are invasive or malignant cancers, intensive treatment in an  
11080 emergency room or at home for allergic bronchospasm, blood dyscrasias or  
11081 convulsions that do not result in hospitalization, or development of drug  
11082 dependence or drug abuse.

### 11083 **16.3.3 Disease-Related Events or Outcomes Not Qualifying as SAEs**

11084 An event which is part of the natural course of the disease under study (i.e., disease  
11085 progression) does not need to be reported as a serious adverse event. Progression of  
11086 the subject's neoplasia will be recorded in the clinical assessments in the CRF. Death  
11087 due to progressive disease is to be recorded on 'Record of Death' CRF page and not  
11088 as an SAE. However, if the progression of the underlying disease is greater than that  
11089 which would normally be expected for the subject, or if the investigator considers  
11090 that there was a causal relationship between treatment with study medication or  
11091 protocol design/procedures and the disease progression, then this must be reported  
11092 as an SAE. Any new primary cancer must be reported as an SAE.

### 11093 **16.3.4 Lack of Efficacy**

11094 “Lack of efficacy” will not be reported as an AE. The signs and symptoms or clinical  
11095 sequelae resulting from lack of efficacy will be reported if they fulfill the AE or SAE  
11096 definition (including clarifications).

### 11097 **16.3.5 Clinical Laboratory Abnormalities and Other Abnormal 11098 Assessments as AEs and SAEs**

11099 Abnormal laboratory findings or other abnormal assessments that are judged by the  
11100 investigator as **clinically significant** (CS) will be recorded as AEs or SAEs if they meet  
11101 the definition of an AE or SAE. Clinically significant abnormal laboratory findings or  
11102 other abnormal assessments that are detected during the study or are present at  
11103 baseline and significantly worsen following the start of the study will be reported as  
11104 AEs or SAEs. However, clinically significant abnormal findings or other abnormal  
11105 assessments that are associated with the disease being studied, unless judged by the  
11106 investigator as more severe than expected for the subject’s condition or that are  
11107 present or detected at the start of the study and do not worsen, will not be reported  
11108 as AEs or SAEs.  
11109



---

11110 The trial interventions are routinely carried out in clinical practice for investigation of  
11111 suspected cancer and the risks of the interventions are therefore not any greater  
11112 than if a man was not part of the trial. The risks of the procedures are relatively low,  
11113 as detailed in Section 11.

11114  
11115 The investigator will exercise his or her medical and scientific judgment in deciding  
11116 whether an abnormal laboratory finding or other abnormal assessment is clinically  
11117 significant.

### 11118 **16.3.6 Recording/Reporting AEs and SAEs**

11119 The AE reporting period for this study begins at randomization and  
11120 will be recorded until 30-days post-biopsy. In the event that the subject does not  
11121 undergo biopsy, AEs and SAEs should be recorded until 30-days post MRI.

11122  
11123 Only adverse events specific to biopsy-related complications including pain, fever,  
11124 hematuria, hematochezia, hematospermia, urinary retention and urinary  
11125 incontinence will be recorded. Any other adverse events will not be recorded.

11126  
11127 AEs will be recorded by a member of the research team or clinical team on an AE  
11128 report form. All SAEs must be recorded on a SAE report form. SAE report forms  
11129 should be sent to the CTG who will keep a log of AEs and SAEs. AE and SAE logs will  
11130 be reviewed by the DSMC.

11131  
11132 For the purposes of this study, only those AEs deemed POSSIBLY, PROBABLY, or  
11133 DEFINITELY related to the study procedures (ie, MRI or biopsy), or meets the criteria  
11134 as a SAE, will be collected and reported.

11135  
11136 Expected AEs includes the following:

- 11137 • Pain
- 11138 • Blood in the urine
- 11139 • Blood in the semen
- 11140 • Blood in the stool or back passage
- 11141 • Erectile dysfunction
- 11142 • Urinary incontinence
- 11143 • Urinary tract infection
- 11144 • Fevers

11145  
11146 In addition, small risks of allergic reactions are associated with the intravenous  
11147 administration of gadolinium, the contrast agent used in MRI scans, as described in  
11148 section 10.18.1.2. This contrast agent is used consistently in MRI scanning and is not  
11149 limited to this trial.

11150  
11151 If any of these symptoms are accompanied by events consistent with the definition  
11152 of an SAE as specified above, then the event will be considered an SAE.

11153  
11154 The Trial Coordinator, Principle Investigator or Chief Investigator should be informed  
11155 of any SAE within 24 hours.

---

11156 All SAE report forms must be completed and the SAE logs updated. All SAEs must be  
11157 followed up until a resolution is reached (i.e. recovered, recovering, recovered with  
11158 sequelae, fatal, not recovered or unknown).

11159

11160 Local sites may have specific institutional protocols for reporting SAEs, which should  
11161 be followed in addition.

11162

11163 When an AE/SAE occurs, it is the responsibility of the investigator to review all  
11164 documentation relative to the event. The investigator will then record all relevant  
11165 information regarding an AE/SAE on the CRF.

11166

11167 The investigator will attempt to establish a diagnosis of the event based on signs,  
11168 symptoms and/or other clinical information. In such cases, the diagnosis should be  
11169 documented as the AE/SAE and not the individual signs/symptoms.

### 11170 **16.3.7 Evaluating AEs and SAEs**

#### 11171 **16.3.7.1 Assessment of Intensity**

11172

11173 The investigator will make an assessment of intensity for each AE and SAE reported  
11174 during the study. Degree of severity and change in severity will be recorded by  
11175 means of National Cancer Institute, Common Terminology Criteria for Adverse  
11176 Events (NCI CTCAE), version 4.03.

11177

11178 If the event is not listed in the NCI CTCAE (v.4.03), the assessment will be based on  
11179 the investigator's clinical judgment. The intensity of each AE and SAE recorded in the  
11180 CRF should be assigned to one of the following categories:

11181

11182 **Mild:** An event that is easily tolerated by the subject, causing minimal discomfort  
11183 and not interfering with everyday activities.

11184 **Moderate:** An event that is sufficiently discomforting to interfere with normal  
11185 everyday activities.

11186 **Severe:** An event that prevents normal everyday activities.

11187

11188 An event that is classified as severe should not be confused with a SAE. Severity is a  
11189 category utilized for rating the intensity of an event; both AEs and SAEs can be  
11190 assessed as severe.

#### 11191 **16.3.7.2 Assessment of Causality**

11192 The investigator is obligated to assess the relationship between investigational  
11193 product and the occurrence of each AE/SAE. The investigator will use clinical  
11194 judgment to determine the relationship. Alternative causes and the temporal  
11195 relationship of the event to the investigational product will be considered and  
11196 investigated. The investigator will also consult the CIB and or Product Information,  
11197 for marketed products, in the determination of his/her assessment.

---

11198 **16.3.8 Follow-up of AEs and SAEs**

11199 After the initial AE/SAE report, the investigator is required to proactively follow each  
11200 subject and provide further information to the PI of the study, on the subject's  
11201 condition.

11202

11203 All AEs and SAEs documented at a previous visit/contact and are ongoing, will be  
11204 reviewed at subsequent visits/contacts.

11205

11206 All AEs and SAEs will be followed until resolution, until the condition stabilizes, until  
11207 the event is otherwise explained or until the subject is lost to follow-up. Once  
11208 resolved, the appropriate AE/SAE CRF page(s) will be updated. The investigator will  
11209 ensure that follow-up includes any supplemental investigations as may be indicated  
11210 to elucidate the nature and/or causality of the AE or SAE.

11211

11212 The PI may request that the investigator perform or arrange for the conduct of  
11213 supplemental measurements and/or evaluations to elucidate as fully as possible the  
11214 nature and/or causality of the AE or SAE. The investigator is obligated to assist. If a  
11215 subject dies during participation in the study or during a recognized follow-up  
11216 period, the PI will be provided with any post-mortem findings.

11217

11218 New or updated information will be recorded on the originally completed SAE CRF,  
11219 with all changes signed and dated by the investigator or designate. The updated SAE  
11220 CRF should be resent to the PI.

11221 **16.3.9 Prompt Reporting of SAEs**

11222 Once the investigator determines that an event meets the protocol definition of an  
11223 SAE, the SAE will be reported to the PI (CURC) within 24 hours.

11224

11225 **16.3.9.1 Responsibility for Reporting Serious Adverse Events to PI**

11226 The Site Investigator must immediately inform the PI (CURC) of all SAEs (within 24  
11227 hours) at the following fax number: 1-416-480-6121.

11228

11229 The PI contact list for SAE receipt, fax numbers, telephone numbers and mailing  
11230 addresses is as follows:

11231 Dr. Laurence Klotz

11232 c/o Marlene Kebabdjian

11233 Sunnybrook Health Sciences Centre

11234 2075 Bayview Avenue A304

11235 Toronto, Ontario M4N 3M5 Canada

11236 Phone: (416) 480-6100 ext 2890

11237 E-mail: [Laurence.Klotz@sunnybrook.ca](mailto:Laurence.Klotz@sunnybrook.ca)

11238 [Marlene.kebabdjian@sunnybrook.ca](mailto:Marlene.kebabdjian@sunnybrook.ca)

11239 **16.3.9.2 Completion and Transmission of the SAE Reports**

11240 Once an investigator becomes aware that an SAE has occurred in a study subject,  
11241 she/he will report the information to the PI within 24 hours. The SAE CRF will always  
11242 be completed as thoroughly as possible with all available details of the event, signed

---

11243 by the investigator (or designee), and forwarded to the PI within the designated time  
11244 frames. If the investigator does not have all information regarding as SAE, he/she will  
11245 not wait to receive additional information before notifying the PI of the event and  
11246 completing the form. The form will be updated when additional information is  
11247 received.

11248  
11249 The investigator will always provide an assessment of causality at the time of the  
11250 initial report as described in Section 16.3.6.2.

### 11251 **16.3.10 Post-study AEs and SAEs**

11252 If the investigator learns of any SAE at any time after a subject has been discharged  
11253 from the study, and such event(s) is (are) reasonably related to the study  
11254 intervention, the investigator should promptly notify the PI (CURC).

11255

## 11256 **17. Study Administration**

### 11257 **17.1 Regulatory and Ethical Considerations**

11258 An important consideration is that men are being randomized to one of two biopsy  
11259 techniques when it is not known which will be more effective in diagnosing clinically  
11260 significant prostate cancer. Both diagnostic tests are currently used in everyday  
11261 clinical practice at the institutions involved in the trial. Though systematic TRUS  
11262 guided biopsy could be considered standard of care, there is enough evidence to  
11263 support the concept that MPMRI-targeted biopsy may be as effective, if not more so,  
11264 than systematic TRUS guided biopsy[27]. This study aims to confirm this.

#### 11265 **17.1.1 Ethical Conduct of the Study and Ethics Approval**

11266 The PI and each participating site will obtain approval to conduct the study from the  
11267 Research Ethics Board (REB) prior to initiating the study.

11268

11269 Participating sites from Ontario will use the Ontario Cancer Research Ethics Board  
11270 (OCREB) as their Board of Record.

11271 This study will be conducted in accordance with 'good clinical practice' (GCP) and all  
11272 applicable regulatory requirements, including where applicable, the 2013 version of  
11273 the Declaration of Helsinki.

11274

11275 The investigator is responsible for ensuring that this protocol, the site's informed  
11276 consent form and any other information that will be present to potential subjects  
11277 are reviewed and approved by the appropriate REB. The investigator agrees to allow  
11278 the REB direct access to all relevant regulatory documents. The PI will provide the  
11279 site investigator(s) with relevant document(s)/data that are needed for REB review  
11280 and approval of the study. Before CRFs can be shipped to the site, the PI must  
11281 receive copies of the REB approval, the approved informed consent form and any  
11282 other information that the REB has approved for presentation to potential subjects.

11283

11284 If the protocol, the informed consent form or any other information that the REB has  
11285 approved for presentation to potential subjects is amended during the study, the  
11286 site investigator(s) is responsible for ensuring the REB reviews and approves, where

---

11287 applicable, these amended documents. The site investigator(s) must follow all  
11288 applicable regulatory requirements pertaining to the use of an amended informed  
11289 consent form including obtaining the REB approval of the amended form before new  
11290 subjects consent to take part in the study using this version of the form. Copies of  
11291 the REB approval of the amended informed consent form/other information and the  
11292 approved amended informed consent form/other information must be forwarded to  
11293 the PI promptly.

### 11294 **17.1.2 Informed Consent**

11295 Informed consent will be obtained before the subject can participate in the study.  
11296 The contents and process of obtaining informed consent will be in accordance with  
11297 all applicable regulatory requirements.

11298  
11299 The subject's consent to participate in the study should be obtained after a full  
11300 explanation has been provided of the procedures to be given. Subjects should be  
11301 given sufficient time (at least 24 hours) after being given the study subject  
11302 information sheet to consider and discuss participation in the study with family and  
11303 friends.

11304  
11305 A contact number will be given to the subject should he wish to discuss any aspect of  
11306 the study. Following this, the clinician will determine that the subject is fully  
11307 informed of the study and their participation, in accordance with Good Clinical  
11308 Practice Guidelines. Subjects will always be asked to sign a consent form. One copy  
11309 will be given to the subject, one copy will be kept with subject's hospital notes and  
11310 one copy should be kept in the local investigator's file.

### 11311 **17.1.3 Investigator Reporting Requirements**

11312 The investigator is responsible for reporting SAEs to the REB in accordance with all  
11313 applicable regulations. Furthermore, the investigator may be required to provide  
11314 periodic safety updates on the conduct of the study at his or her site and notification  
11315 of study closure to the REB.

### 11316 **17.2 Study Monitoring**

11317 This study will be monitored by a CRA. The CRA will contact the sites by telephone  
11318 on a predetermined basis and would conduct a monitoring visits based on the data  
11319 entered in the EDC and queries.

11320  
11321 During these contacts, the monitor will:

- 11322 • Check the progress of the study
- 11323 • Review study data collected
- 11324 • Conduct source document verification
- 11325 • Identify any issues and address their resolution

11326  
11327 This will be done in order to verify that the:

- 11328 • Data are authentic, accurate and complete
- 11329 • Safety and rights of subjects are being protected
- 11330 • Study is conducted in accordance with the currently approved protocol (and

---

11331 any amendments), GCP and all applicable regulatory requirements

11332

11333 The investigator agrees to allow CRA personnel direct access to all relevant  
11334 documents and to allocate his/her time and the time of his/her staff to CRA  
11335 personnel to discuss findings and any relevant issues.

### 11336 **17.3 Quality Assurance**

11337 To ensure compliance with GCP and all applicable regulatory requirements,  
11338 regulatory agencies may conduct a regulatory inspection of the study. Such  
11339 audits/inspections can occur at any time during or after completion of the study. If  
11340 an audit or inspection occurs, the investigator and institution agree to allow the  
11341 auditor/inspector direct access to all relevant documents and to allocate his/her  
11342 time and the time of his/her staff to the auditor/inspector to discuss findings and  
11343 any relevant issues.

### 11344 **17.4 Study and Site Closure**

11345 Upon completion of the study, the site investigator(s) will conduct the following  
11346 activities:

- 11347 • Return of all study data to the Sponsor (CURC)
- 11348 • Submission of all study data and data queries to OCOG
- 11349 • Review of site study records for completeness

11350

11351 In addition, the Principal Investigator has the right to temporarily suspend or  
11352 prematurely discontinue this study either at a single site or at all sites at any time for  
11353 reasons including but not limited to, safety or ethical issues or severe non-  
11354 compliance. If the PI determines such action is needed, the PI will discuss this with  
11355 the site investigator (including the reasons for taking such action) at that time. When  
11356 feasible, the PI will provide advance notification to the site investigator of the  
11357 impending action prior to it taking effect.

11358

11359 Individual site Investigators may also terminate their participation in the study at any  
11360 time. If the investigator determines such action is needed, the investigator will  
11361 discuss this with the PI(including the reasons for taking such action) at that time.  
11362 When feasible, the investigator will provide advance notification to the PI of the  
11363 impending action prior to it taking effect.

11364

11365 The PI will promptly inform all other investigators and/or institutions conducting the  
11366 study if the study is suspended or terminated for safety reasons and will also inform  
11367 the regulatory authorities of the suspension or termination of the study and the  
11368 reason(s) for the action. If required by applicable regulations, the investigator must  
11369 inform the REB promptly and provide the reason for the suspension or termination.

11370

11371 If the study is prematurely discontinued, all study data must be returned to the PI. In  
11372 addition, the investigator has the responsibility to return any used/unused clinical  
11373 supplies.

11374

---

11375 Financial compensation to investigators and/or institutions will be in accordance  
11376 with the agreement established between the investigator and the PI.

### 11377 **17.5 Records Retention**

11378 Following closure of the study, the site investigator(s) must maintain all site study  
11379 records in a safe and secure location. The records must be maintained to allow easy  
11380 and timely retrieval when needed and whenever feasible, to allow any subsequent  
11381 review of data in conjunction with assessment of the facility, supporting systems and  
11382 staff.

11383  
11384 The site investigator(s) will retain study records to comply with all applicable  
11385 regulatory requirements. The minimum retention time will meet the strictest  
11386 standard applicable to that site for the study as dictated by any institutional  
11387 requirements or local laws or regulations of Health Canada standards/procedures;  
11388 otherwise, the retention period will default to 25 years.

11389  
11390 The site investigator(s) must inform the PI of any changes in the archival  
11391 arrangements, including but not limited to the following: archival at an off-site  
11392 facility, transfer of ownership of the records in the event the investigator leaves the  
11393 site. The PI should be informed of this change if it affects their access to the  
11394 information in case of an audit.

### 11395 **17.6 Data Management**

11396 Subject data are collected by the investigator or designee using the CRF within an  
11397 Electronic Data Capture (EDC) system. Subject data necessary for analysis and  
11398 reporting will be entered/transmitted into a validated database. Clinical data  
11399 management will be performed in accordance with applicable standards and data  
11400 cleaning procedures. Database lock will occur when data management quality  
11401 control procedures are completed.

### 11402 **17.7 Publication**

11403 The results from the study will be analyzed and published as soon as possible and is  
11404 appropriate. All study-related communications can only be presented or published  
11405 after approval from all relevant members involved in the trial.

11406  
11407 All publications shall include appropriate indication named authors as agreed on by  
11408 the members involved in the trial. For the main study reports, senior and first  
11409 authorship will be determined by agreement of the Chief Investigator, the Principle  
11410 Investigator at time of manuscript drafting. Authorship will be based on  
11411 recommendations of the International Committee of Medical Journal Editors  
11412 ([www.ICMJE.org](http://www.ICMJE.org)) where all authors meet the following for criteria:

- 11413  
11414       13. Substantial contributions to the conception or design of the work; or the  
11415       acquisition, analysis, or interpretation of data for the work; AND  
11416       14. Drafting the work or revising it critically for important intellectual content;  
11417       AND  
11418       15. Final approval of the version to be published; AND

---

11419 16. Agreement to be accountable for all aspects of the work in ensuring that  
11420 questions related to the accuracy or integrity of any part of the work are  
11421 appropriately investigated and resolved.  
11422  
11423 If there are no named authors (i.e. group authorship) then a writing committee will  
11424 be identified that would usually include these people. The clinical trials.gov  
11425 registration number that will be allocated to this trial will be attached to any  
11426 publications resulting from this trial.  
11427  
11428 Trial funding agencies (OICR, PCC and collaborators as appropriate) will be  
11429 acknowledged in all publications.  
11430  
11431 The members of the trial steering committee will be listed with their affiliations in  
11432 the acknowledgements/appendix of the main publication.  
11433  
11434



11435  
11436  
11437  
11438  
11439  
11440  
11441  
11442  
11443  
11444  
11445  
11446  
11447  
11448  
11449  
11450  
11451  
11452  
11453  
11454  
11455  
11456  
11457  
11458  
11459  
11460  
11461  
11462  
11463  
11464  
11465  
11466  
11467  
11468  
11469  
11470  
11471  
11472  
11473  
11474  
11475  
11476  
11477  
11478

---

## 18. References

1. Cooperberg MR, Carroll PR, Klotz L: **Active surveillance for prostate cancer: progress and promise.** *Journal of clinical oncology : official journal of the American Society of Clinical Oncology* 2011, **29**(27):3669-3676.
2. **PI-RADS(TM) Prostate Imaging – Reporting and Data System V.2.** In.: American College of Radiology; 2015.
3. Dickinson L, Ahmed HU, Allen C, Barentsz JO, Carey B, Futterer JJ, Heijmink SW, Hoskin PJ, Kirkham A, Padhani AR *et al*: **Magnetic resonance imaging for the detection, localisation, and characterisation of prostate cancer: recommendations from a European consensus meeting.** *Eur Urol* 2011, **59**(4):477-494.
4. Heidenreich A, Bastian PJ, Bellmunt J, Bolla M, Joniau S, van der Kwast T, Mason M, Matveev V, Wiegel T, Zattoni F *et al*: **EAU guidelines on prostate cancer. part 1: screening, diagnosis, and local treatment with curative intent-update 2013.** *Eur Urol* 2014, **65**(1):124-137.
5. Center MM, Jemal A, Lortet-Tieulent J, Ward E, Ferlay J, Brawley O, Bray F: **International variation in prostate cancer incidence and mortality rates.** *Eur Urol* 2012, **61**(6):1079-1092.
6. **American Cancer Society Prostate Cancer Key Statistics. Accessed 1st November 2014. Accessed from:**  
<http://www.cancer.org/cancer/prostatecancer/detailedguide/prostate-cancer-key-statistics>[<http://www.cancer.org/cancer/prostatecancer/detailedguide/prostate-cancer-key-statistics>]
7. Loeb S, Heuvel vD, Zhu X, Bangma CH, Schroder FH, Roobol MJ: **Reply from Authors re: Alexandre R. Zlotta, Robert K. Nam. To Biopsy or Not to Biopsy: Thou Shall Think Twice.** *Eur Urol* 2012;**61**:11157. *European urology* 2012, **61**(6):1117-1118.
8. Stamey TA, Freiha FS, McNeal JE, Redwine EA, Whittemore AS, Schmid HP: **Localized prostate cancer. Relationship of tumor volume to clinical significance for treatment of prostate cancer.** *Cancer* 1993, **71**(3 Suppl):933-938.
9. Ahmed HU, Hu Y, Carter T, Arumainayagam N, Lecornet E, Freeman A, Hawkes D, Barratt DC, Emberton M: **Characterizing clinically significant prostate cancer using template prostate mapping biopsy.** *J Urol* 2011, **186**(2):458-464.
10. Netto GJ: **Tumor volume threshold of insignificant prostate cancer--was Dr. Stamey right all along?***J Urol* 2011, **185**(1):10-11.
11. Mowatt G, Scotland G, Boachie C, Cruickshank M, Ford JA, Fraser C, Kurban L, Lam TB, Padhani AR, Royle J *et al*: **The diagnostic accuracy and cost-effectiveness of magnetic resonance spectroscopy and enhanced magnetic resonance imaging techniques in aiding the**

- 
- 11479            **localisation of prostate abnormalities for biopsy: a systematic review**  
11480            **and economic evaluation.** *Health technology assessment* 2013,  
11481            **17(20):vii-xix, 1-281.**
- 11482    12.    Morash C, Tey R, Agbassi C, Klotz L, McGowan T, Srigley J, Evans A:  
11483            **Active surveillance for the management of localized prostate cancer:**  
11484            **Guideline recommendations.** *Canadian Urological Association journal =*  
11485            *Journal de l'Association des urologues du Canada* 2015, **9(5-6):171-178.**
- 11486    13.    Wilt TJ, Brawer MK, Jones KM, Barry MJ, Aronson WJ, Fox S, Gingrich  
11487            JR, Wei JT, Gilhooly P, Grob BM *et al*: **Radical prostatectomy versus**  
11488            **observation for localized prostate cancer.** *N Engl J Med* 2012,  
11489            **367(3):203-213.**
- 11490    14.    Litwin MS, Lubeck DP, Spitalny GM, Henning JM, Carroll PR: **Mental**  
11491            **health in men treated for early stage prostate carcinoma: a**  
11492            **posttreatment, longitudinal quality of life analysis from the Cancer of**  
11493            **the Prostate Strategic Urologic Research Endeavor.** *Cancer* 2002,  
11494            **95(1):54-60.**
- 11495    15.    Dall'Era MA, Albertsen PC, Bangma C, Carroll PR, Carter HB, Cooperberg  
11496            MR, Freedland SJ, Klotz LH, Parker C, Soloway MS: **Active surveillance**  
11497            **for prostate cancer: a systematic review of the literature.** *Eur Urol*  
11498            2012, **62(6):976-983.**
- 11499    16.    Wilt TJ, MacDonald R, Rutks I, Shamliyan TA, Taylor BC, Kane RL:  
11500            **Systematic review: comparative effectiveness and harms of**  
11501            **treatments for clinically localized prostate cancer.** *Annals of internal*  
11502            *medicine* 2008, **148(6):435-448.**
- 11503    17.    **CG58 Prostate cancer: NICE guidance**  
11504            [<http://guidance.nice.org.uk/CG58/NICEGuidance/pdf/English>]
- 11505    18.    Nevoux P, Ouzzane A, Ahmed HU, Emberton M, Montironi R, Presti Jr  
11506            JC, Villers A: **Quantitative tissue analyses of prostate cancer foci in an**  
11507            **unselected cystoprostatectomy series.** *BJU Int* 2011.
- 11508    19.    Sedelaar JP, Vijverberg PL, De Reijke TM, de la Rosette JJ, Kil PJ,  
11509            Braeckman JG, Hendriks AJ: **Transrectal ultrasound in the diagnosis of**  
11510            **prostate cancer: state of the art and perspectives.** *Eur Urol* 2001,  
11511            **40(3):275-284.**
- 11512    20.    Scattoni V, Zlotta A, Montironi R, Schulman C, Rigatti P, Montorsi F:  
11513            **Extended and saturation prostatic biopsy in the diagnosis and**  
11514            **characterisation of prostate cancer: a critical analysis of the literature.**  
11515            *Eur Urol* 2007, **52(5):1309-1322.**
- 11516    21.    Djavan B, Ravery V, Zlotta A, Dobronski P, Dobrovits M, Fakhari M, Seitz  
11517            C, Susani M, Borkowski A, Boccon-Gibod L *et al*: **Prospective evaluation**  
11518            **of prostate cancer detected on biopsies 1, 2, 3 and 4: when should we**  
11519            **stop?** *J Urol* 2001, **166(5):1679-1683.**
- 11520    22.    Ahmed HU, Kirkham A, Arya M, Illing R, Freeman A, Allen C, Emberton  
11521            M: **Is it time to consider a role for MRI before prostate biopsy?** *Nat Rev*  
11522            *Clin Oncol* 2009, **6(4):197-206.**

- 
- 11523 23. Bossuyt PM, Reitsma JB, Bruns DE, Gatsonis CA, Glasziou PP, Irwig LM,  
11524 Lijmer JG, Moher D, Rennie D, de Vet HC: **Towards complete and**  
11525 **accurate reporting of studies of diagnostic accuracy: the STARD**  
11526 **initiative.** *Clin Radiol* 2003, **58**(8):575-580.
- 11527 24. White S, Hricak H, Forstner R, Kurhanewicz J, Vigneron DB, Zaloudek CJ,  
11528 Weiss JM, Narayan P, Carroll PR: **Prostate cancer: effect of postbiopsy**  
11529 **hemorrhage on interpretation of MR images.** *Radiology* 1995,  
11530 **195**(2):385-390.
- 11531 25. Tanimoto A, Nakashima J, Kohno H, Shinmoto H, Kuribayashi S:  
11532 **Prostate cancer screening: the clinical value of diffusion-weighted**  
11533 **imaging and dynamic MR imaging in combination with T2-weighted**  
11534 **imaging.** *J Magn Reson Imaging* 2007, **25**(1):146-152.
- 11535 26. Kirkham AP, Emberton M, Allen C: **How good is MRI at detecting and**  
11536 **characterising cancer within the prostate?***Eur Urol* 2006, **50**(6):1163-  
11537 1174; discussion 1175.
- 11538 27. Moore CM, Robertson NL, Arsanious N, Middleton T, Villers A, Klotz L,  
11539 Taneja SS, Emberton M: **Image-guided prostate biopsy using magnetic**  
11540 **resonance imaging-derived targets: a systematic review.** *Eur Urol*  
11541 2013, **63**(1):125-140.
- 11542 28. Villers A, Puech P, Mouton D, Leroy X, Ballereau C, Lemaitre L: **Dynamic**  
11543 **contrast enhanced, pelvic phased array magnetic resonance imaging**  
11544 **of localized prostate cancer for predicting tumor volume: correlation**  
11545 **with radical prostatectomy findings.** *J Urol* 2006, **176**(6 Pt 1):2432-  
11546 2437.
- 11547 29. Wu LM, Xu JR, Ye YQ, Lu Q, Hu JN: **The clinical value of diffusion-**  
11548 **weighted imaging in combination with T2-weighted imaging in**  
11549 **diagnosing prostate carcinoma: a systematic review and meta-**  
11550 **analysis.** *AJR Am J Roentgenol* 2012, **199**(1):103-110.
- 11551 30. Wu LM, Xu JR, Gu HY, Hua J, Chen J, Zhang W, Zhu J, Ye YQ, Hu J:  
11552 **Usefulness of diffusion-weighted magnetic resonance imaging in the**  
11553 **diagnosis of prostate cancer.** *Acad Radiol* 2012, **19**(10):1215-1224.
- 11554 31. Umbehr M, Bachmann LM, Held U, Kessler TM, Sulser T, Weishaupt D,  
11555 Kurhanewicz J, Steurer J: **Combined magnetic resonance imaging and**  
11556 **magnetic resonance spectroscopy imaging in the diagnosis of prostate**  
11557 **cancer: a systematic review and meta-analysis.** *Eur Urol* 2009,  
11558 **55**(3):575-590.
- 11559 32. Yamamoto T, Musunuru B, Vesprini D, Zhang L, Ghanem G, Loblaw A,  
11560 Klotz L: **Metastatic Prostate Cancer in Men Initially Managed with**  
11561 **Active Surveillance.** *The Journal of urology* 2015.
- 11562 33. Klotz L, Vesprini D, Sethukavalan P, Jethava V, Zhang L, Jain S,  
11563 Yamamoto T, Mamedov A, Loblaw A: **Long-term follow-up of a large**  
11564 **active surveillance cohort of patients with prostate cancer.** *Journal of*  
11565 *clinical oncology : official journal of the American Society of Clinical*  
11566 *Oncology* 2015, **33**(3):272-277.

- 
- 11567 34. Hoeks CM, Somford DM, van Oort IM, Vergunst H, Oddens JR, Smits  
11568 GA, Roobol MJ, Bul M, Hambroek T, Witjes JA *et al*: **Value of 3-T**  
11569 **Multiparametric Magnetic Resonance Imaging and Magnetic**  
11570 **Resonance-Guided Biopsy for Early Risk Restratification in Active**  
11571 **Surveillance of Low-Risk Prostate Cancer: A Prospective Multicenter**  
11572 **Cohort Study.** *Invest Radiol* 2013.
- 11573 35. Abd-Alazeez M, Ahmed HU, Arya M, Charman SC, Anastasiadis E,  
11574 Freeman A, Emberton M, Kirkham A: **The accuracy of multiparametric**  
11575 **MRI in men with negative biopsy and elevated PSA level-Can it rule**  
11576 **out clinically significant prostate cancer?***Urol Oncol* 2013.
- 11577 36. Kasivisvanathan V, Dufour R, Moore CM, Ahmed HU, Abd-Alazeez M,  
11578 Charman SC, Freeman A, Allen C, Kirkham A, van der Meulen J *et al*:  
11579 **Transperineal magnetic resonance image-targeted prostate biopsy**  
11580 **versus transperineal template prostate biopsy in the detection of**  
11581 **clinically significant prostate cancer.** *J Urol* 2012.
- 11582 37. Haffner J, Lemaitre L, Puech P, Haber GP, Leroy X, Jones JS, Villers A:  
11583 **Role of magnetic resonance imaging before initial biopsy: comparison**  
11584 **of magnetic resonance imaging-targeted and systematic biopsy for**  
11585 **significant prostate cancer detection.** *BJU Int* 2011, **108**(8 Pt 2):E171-  
11586 178.
- 11587 38. Siddiqui MM, Rais-Bahrami S, Turkbey B, George AK, Rothwax J, Shakir  
11588 N, Okoro C, Raskolnikov D, Parnes HL, Linehan WM *et al*: **Comparison**  
11589 **of MR/ultrasound fusion-guided biopsy with ultrasound-guided**  
11590 **biopsy for the diagnosis of prostate cancer.** *Jama* 2015, **313**(4):390-  
11591 397.
- 11592 39. Rosario DJ, Lane JA, Metcalfe C, Donovan JL, Doble A, Goodwin L, Davis  
11593 M, Catto JW, Avery K, Neal DE *et al*: **Short term outcomes of prostate**  
11594 **biopsy in men tested for cancer by prostate specific antigen:**  
11595 **prospective evaluation within ProtecT study.** *BMJ* 2012, **344**:d7894.
- 11596 40. Siddiqui MM, Rais-Bahrami S, Truong H, Stamatakis L, Vourganti S, Nix  
11597 J, Hoang AN, Walton-Diaz A, Shuch B, Weintraub M *et al*: **Magnetic**  
11598 **Resonance Imaging/Ultrasound-Fusion Biopsy Significantly Upgrades**  
11599 **Prostate Cancer Versus Systematic 12-core Transrectal Ultrasound**  
11600 **Biopsy.** *Eur Urol* 2013.
- 11601 41. Wysock JS, Rosenkrantz AB, Huang WC, Stifelman MD, Lepor H, Deng  
11602 FM, Melamed J, Taneja SS: **A Prospective, Blinded Comparison of**  
11603 **Magnetic Resonance (MR) Imaging-Ultrasound Fusion and Visual**  
11604 **Estimation in the Performance of MR-targeted Prostate Biopsy: The**  
11605 **PROFUS Trial.** *Eur Urol* 2013.
- 11606 42. **Undertaking a transrectal ultrasound guided biopsy of the prostate.**  
11607 **Public Health England Prostate Cancer Risk Management Programme**  
11608 **Guidelines.** [http://www.cancerscreening.nhs.uk/prostate/pcrmp-guide-](http://www.cancerscreening.nhs.uk/prostate/pcrmp-guide-1.html)  
11609 [1.html](http://www.cancerscreening.nhs.uk/prostate/pcrmp-guide-1.html)[<http://www.cancerscreening.nhs.uk/prostate/pcrmp-guide-1.html>]

- 
- 11610 43. Epstein JI, Allsbrook WC, Jr., Amin MB, Egevad LL, Committee IG: **The**  
11611 **2005 International Society of Urological Pathology (ISUP) Consensus**  
11612 **Conference on Gleason Grading of Prostatic Carcinoma.** *The American*  
11613 *journal of surgical pathology* 2005, **29**(9):1228-1242.
- 11614 44. Cullen J, Rosner IL, Brand TC, Zhang N, Tsiatis AC, Moncur J, Ali A, Chen  
11615 Y, Knezevic D, Maddala T *et al*: **A Biopsy-based 17-gene Genomic**  
11616 **Prostate Score Predicts Recurrence After Radical Prostatectomy and**  
11617 **Adverse Surgical Pathology in a Racially Diverse Population of Men**  
11618 **with Clinically Low- and Intermediate-risk Prostate Cancer.** *European*  
11619 *urology* 2015, **68**(1):123-131.
- 11620 45. Bryant RJ, Sjoberg DD, Vickers AJ, Robinson MC, Kumar R, Marsden L,  
11621 Davis M, Scardino PT, Donovan J, Neal DE *et al*: **Predicting High-Grade**  
11622 **Cancer at Ten-Core Prostate Biopsy Using Four Kallikrein Markers**  
11623 **Measured in Blood in the ProtecT Study.** *Journal of the National*  
11624 *Cancer Institute* 2015, **107**(7).
- 11625 46. Nam RK, Cheung P, Herschorn S, Saskin R, Su J, Klotz LH, Chang M,  
11626 Kulkarni GS, Lee Y, Kodama RT *et al*: **Incidence of complications other**  
11627 **than urinary incontinence or erectile dysfunction after radical**  
11628 **prostatectomy or radiotherapy for prostate cancer: a population-**  
11629 **based cohort study.** *The Lancet Oncology* 2014, **15**(2):223-231.
- 11630 47. Pocock SJ, Simon R: **Sequential treatment assignment with balancing**  
11631 **for prognostic factors in the controlled clinical trial.** *Biometrics* 1975,  
11632 **31**(1):103-115.
- 11633 48. Moore CM, Kasivisvanathan V, Eggener S, Emberton M, Futterer JJ, Gill  
11634 IS, Grubb Iii RL, Hadaschik B, Klotz L, Margolis DJ *et al*: **Standards of**  
11635 **Reporting for MRI-targeted Biopsy Studies (START) of the Prostate:**  
11636 **Recommendations from an International Working Group.** *Eur Urol*  
11637 2013, **64**(4):544-552.
- 11638 49. Presti JC, Jr.: **Prostate biopsy: how many cores are enough?** *Urologic*  
11639 *oncology* 2003, **21**(2):135-140.  
11640  
11641

11642

**Appendices**

11643

**Appendix 1: Time windows for data collection**

11644

11645 For the overall schedule of visits for each arm please see Section 9.3, Tables 1-3

11646 For details on time windows permitted for each trial intervention to be completed

11647 please see Table 5 below.

11648

11649 Table 5: Details of time windows permitted for all trial interventions.

11650

| Contact and Purpose if not clear                                                                                                                                     | Time window permitted +/-30 days of scheduled visit                                                                                                                                                                                                                                                                                                                                                                                                  |
|----------------------------------------------------------------------------------------------------------------------------------------------------------------------|------------------------------------------------------------------------------------------------------------------------------------------------------------------------------------------------------------------------------------------------------------------------------------------------------------------------------------------------------------------------------------------------------------------------------------------------------|
| <b>Visit 1</b><br><br>Screening (eligibility review, med hx,)                                                                                                        | Any time following referral of subject.<br><br>Ideally perform as soon as possible following receipt of referral.                                                                                                                                                                                                                                                                                                                                    |
| <b>Visit 1</b><br><br>Consent<br><br>Vitals, DRE<br><br>Randomization<br><br>EQ-5D-5L Questionnaire (baseline)<br><br>Optional blood, urine, semen and tissue sample | Complete only once subject has had 24 hours after receiving the patient information to fully consider the study.<br><br>Ideally on same visit as screening.<br><br>Complete at screening<br><br>Immediately after consent form signed and eligibility is confirmed.<br><br>Complete immediately after consent form is signed<br><br>Complete after additional informed consent signed, after randomization and up until any point prior to a biopsy. |
| <b>Visit 2</b><br><br>MRI                                                                                                                                            | Only for men randomized to this arm.<br><br>Any time following randomization. Ideally within 1 week of randomization.                                                                                                                                                                                                                                                                                                                                |

|                                                                                                          |                                                                                                                                                                                                                                                                                                                                                                                                                                                                                                                                                                                                                                                                                                                                                                                        |
|----------------------------------------------------------------------------------------------------------|----------------------------------------------------------------------------------------------------------------------------------------------------------------------------------------------------------------------------------------------------------------------------------------------------------------------------------------------------------------------------------------------------------------------------------------------------------------------------------------------------------------------------------------------------------------------------------------------------------------------------------------------------------------------------------------------------------------------------------------------------------------------------------------|
| <p><b>Visit 3</b></p> <p>MRI-Targeted Biopsy of Prostate</p>                                             | <p>Only for men randomized to this arm who have a lesion on MRI that needs a biopsy.</p> <p>Any time following the MRI being reported, ideally within 1 week of MRI.</p> <p>Depending on local Urology service structure, an appointment for a biopsy may need to be booked at the same time as the MRI is booked (i.e. immediately after randomization) in order for a slot to be secured for a biopsy to occur in timely fashion.</p> <p>If it is determined from the MRI that a biopsy is not required then the biopsy appointment can be used instead of Visit 4 for follow up of results and treatment decision.</p>                                                                                                                                                              |
| <p><b>Visit 3</b></p> <p>Systematic TRUS guided biopsy</p>                                               | <p>Only for men randomized to this arm.</p> <p>Any time following randomization. Ideally within 4 weeks of randomization.</p>                                                                                                                                                                                                                                                                                                                                                                                                                                                                                                                                                                                                                                                          |
| <p><b>Visit 3</b></p> <p>Immediate post-biopsy questionnaire</p> <p>30-day post-biopsy questionnaire</p> | <p>Should be completed and returned immediately after a biopsy, before the subject leaves the department. As long as questionnaire completed within 24 hours it will be acceptable.</p> <p>To be given to subject to take home after biopsy and completed as instructed on day 30 post-biopsy.</p> <p>To be returned by post or at follow up appointment (Visit 4).</p> <p>If Visit 4 is earlier than 30 days post biopsy then this questionnaire can be given to the research team when 30 days is finally complete.</p> <p>If Visit 4 is on or later than 30 days then this can be returned at the Visit 4 appointment.</p> <p>As long as questionnaire is completed at 30-60 days post-biopsy, it will be acceptable. Ideally the questionnaire should be completed as close as</p> |

|                                                                                                             |                                                                                                                                                                                                                                                                                                                                                                                                                                                                                              |
|-------------------------------------------------------------------------------------------------------------|----------------------------------------------------------------------------------------------------------------------------------------------------------------------------------------------------------------------------------------------------------------------------------------------------------------------------------------------------------------------------------------------------------------------------------------------------------------------------------------------|
| Telephone reminder                                                                                          | <p>possible to 30 days post-biopsy.</p> <p>At 30-days post biopsy a member of the research team will phone the subject to remind them to fill out the 30-day questionnaires</p>                                                                                                                                                                                                                                                                                                              |
| <p><b>Visit 4</b></p> <p>Follow up for results<br/>And treatment Decision</p> <p>EQ-5D-5L Questionnaire</p> | <p>Should be completed as soon as possible following the availability of any pathology results. Alternatively, if a man is in the MRI arm and the MRI is negative, this follow up should occur after the availability of the MRI report. Ideally the follow up appointment should be within 6 weeks of randomization.</p> <p>Depending on local Urology service structure, these results may need to be discussed at an MDT meeting to inform treatment decision.</p> <p>To be completed</p> |
| <p><b>Visit 5</b><br/><b>26 week follow up</b></p>                                                          | <ul style="list-style-type: none"> <li>• Vitals, DRE</li> <li>• PSA</li> <li>• Optional blood</li> </ul>                                                                                                                                                                                                                                                                                                                                                                                     |
| <p><b>Visit 6</b><br/>1 year follow up<br/>52 week follow up visit</p>                                      | <p>The following information will be obtained on an annual basis:</p> <ul style="list-style-type: none"> <li>• Vitals, DRE</li> <li>• time to cancer diagnosis;</li> <li>• Gleason score progression;</li> <li>• time to intervention on active surveillance;</li> <li>• time on active surveillance;</li> <li>• results of PSA tests.</li> <li>• results of any off protocol biopsies or MRI</li> <li>• optional sample collection (blood, urine)</li> </ul>                                |
| <p><b>Visit 7</b><br/><b>78 week follow up</b></p>                                                          | <ul style="list-style-type: none"> <li>• Vitals, DRE</li> <li>• PSA</li> <li>• Optional blood</li> </ul>                                                                                                                                                                                                                                                                                                                                                                                     |



**Visit 8**

104 week follow up visit

The following information will be obtained on an annual basis:

- Vitals, DRE
- time to cancer diagnosis;
- Gleason score progression;
- time to intervention on active surveillance;
- time on active surveillance;
- results of PSA tests.
- Optional sample collection (blood, urine)

Those subjects randomized to ARM A but who did not have an MPMRI-targeted biopsy will have an additional MPMRI at Visit 8. This will be followed by a targeted-biopsy if results of MRI are positive (PI-RADS 3-5).

All patients in both Arm A and B who have remained undiagnosed or untreated (on active surveillance) will have a follow up MRI 2 years after study entry.

Follow-up will cease once treatment beyond active surveillance is undertaken (prostatectomy, radiation therapy, focal therapy, etc.).

11651

11652

11653  
11654  
11655  
11656

---

## Appendix 2: MPMRI Reporting Proforma

**Date of MRI scan:**

|                      |                      |                      |                      |                      |                      |                      |                      |                      |
|----------------------|----------------------|----------------------|----------------------|----------------------|----------------------|----------------------|----------------------|----------------------|
| <input type="text"/> |
| day                  |                      |                      | month                |                      |                      | year                 |                      |                      |

**Date of Report:**

|                      |                      |                      |                      |                      |                      |                      |                      |                      |
|----------------------|----------------------|----------------------|----------------------|----------------------|----------------------|----------------------|----------------------|----------------------|
| <input type="text"/> |
| day                  |                      |                      | month                |                      |                      | year                 |                      |                      |

**Reporting Radiologist:**

11657  
11658  
11659  
11660

**Form Completion Instructions:**

11661 Radiologists should annotate this diagram with up to 3 suspicious areas  
11662 scoring 3 or greater on the PI-RADS v2 scale of suspicion. The three most  
11663 suspicious areas should be annotated, each with the score clearly marked.  
11664

11665 "T1" should be the area with the greatest degree of suspicion. If  
11666 applicable, "T2" should be the area with the next greatest degree of  
11667 suspicion and finally if applicable, "T3" should be the area with the next  
11668 greatest degree of suspicion.

11669  
11670 For each suspicious area, triaxial measurements should be recorded with  
11671 all 3 measurements in orthogonal planes provided whenever possible. In  
11672 the PZ, lesions should be measured on ADC. In the TZ, lesions should be  
11673 measured on T2W.  
11674

11675 If lesion measurement is difficult or compromised on ADC (for PZ) or T2W  
11676 (for TZ), measurement should be made on the sequence that show the  
11677 lesion best. For example, coronal measurements may be best performed  
11678 in the peripheral zone on T2 images.  
11679

11680

**IMPORTANT SUBMISSION INSTRUCTIONS:**

11681

11682  
11683 **Please send this completed case report form and a DVD with the images AND**  
11684 **completed MRI Report to:**

11685

11686 Marlene Kebabdjian  
11687 Sunnybrook Health Sciences Centre  
11688 Urology Research, A304  
11689 2075 Bayview Avenue, A304  
11690 Toronto, Ontario, M4N 3M5

11691  
11692  
11693  
11694  
11695

11696  
 11697  
 11698  
 11699  
 11700  
 11701  
 11702  
 11703  
 11704  
 11705  
 11706  
 11707  
 11708  
 11709  
 11710  
 11711  
 11712  
 11713  
 11714  
 11715  
 11716  
 11717  
 11718  
 11719  
 11720  
 11721  
 11722  
 11723  
 11724  
 11725  
 11726  
 11727  
 11728  
 11729  
 11730  
 11731  
 11732  
 11733  
 11734  
 11735  
 11736  
 11737  
 11738  
 11739  
 11740  
 11741  
 11742

**NO DCE (Part 1 or 2) – T2/DWI/ADC  
 DO NOT VIEW DCE – YOU SHOULD NOT KNOW THE  
 PSA**

**Draw lesions on diagram below annotating each with the T index (i.e T1; T2...)**

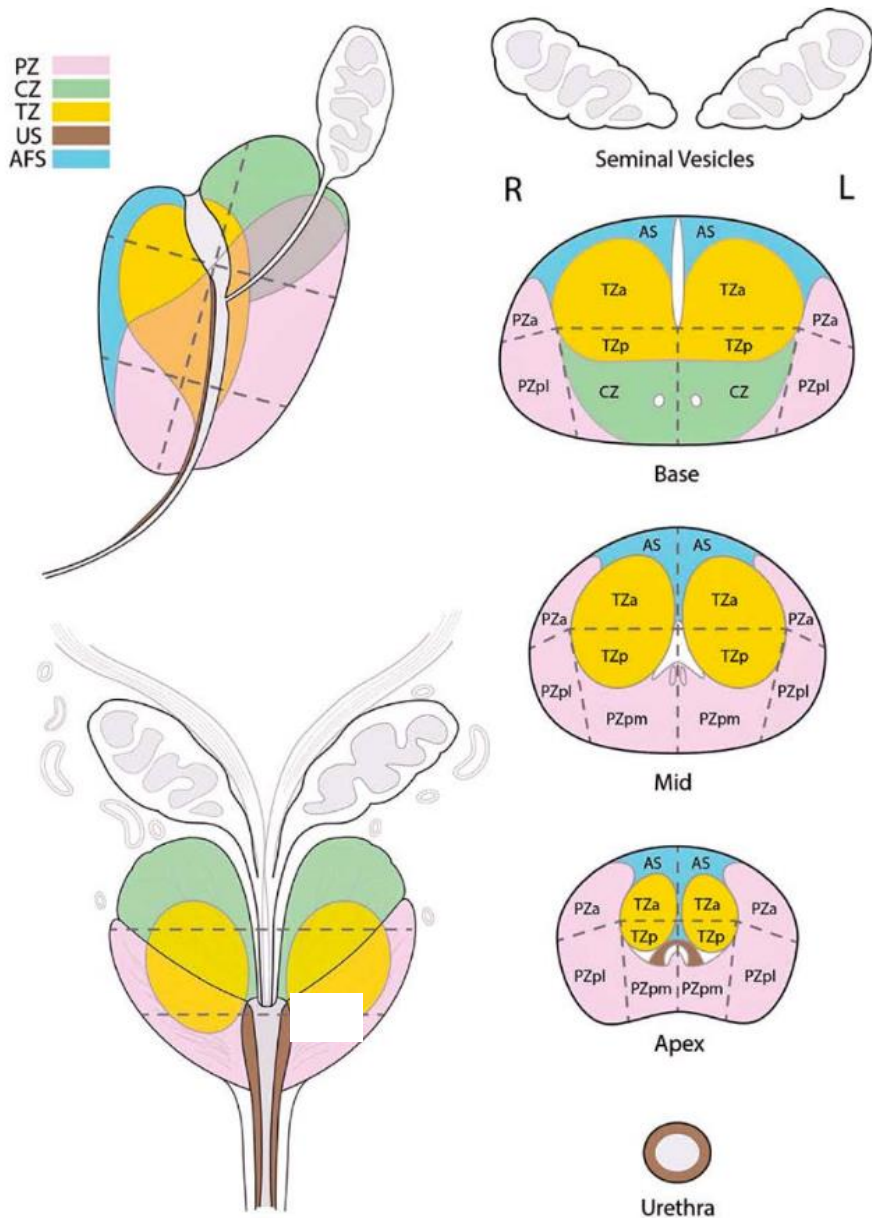

11743  
11744  
11745  
11746  
11747

---

NO DCE (Part 1 or 2) – T2/DWI/ADC  
**DO NOT VIEW DCE – YOU SHOULD NOT KNOW THE  
PSA**

- Image quality:**     Good  
**(DWI + T2)**         Minor image quality issues (still acceptable)  
                           Unacceptable but some lesions seen warranting biopsy  
                           Unacceptable, can't interpret at all

11748  
11749  
11750  
11751  
11752  
11753  
11754  
11755

**If image quality is not good please comment:**

\_\_\_\_\_

\_\_\_\_\_

\_\_\_\_\_

---

11756

**How to record locations**

11757  
11758  
11759

**Location Code Format:** (L/R), (B/M/A), Pi-RadsZone (AS, TZa, TZp, CZ, PZa, PZpl, PZpm)

11760

Number of candidate tumor sites: \_\_\_\_\_ I

11761

**If none, please proceed to Section B**

11762

11763

11764

11765

**Section A:**

11766

**Target 1** (*Highest Pi-Rads score and then largest*):

11767

Present (Y/N): \_\_\_\_\_

11768

Overall Pi-Rads Score(1-5): \_\_\_\_\_ Your Likert Score(1-5): \_\_\_\_\_

11769

Pi-Rads Score (T2) (1-5) : \_\_\_\_\_ Pi-Rads Score (DWI) (1-5): \_\_\_\_\_

11770

Mean ADC: \_\_\_\_\_ Min ADC – single voxel: \_\_\_\_\_ mm<sup>2</sup>/s

11771

x10<sup>-6</sup>  
Size: \_\_\_\_\_ x \_\_\_\_\_ x \_\_\_\_\_ mm (Ax1 > Ax2 x SI)

11772

Location(s) (largest to smallest area involved):

11773

\_\_\_\_\_, \_\_\_\_\_, \_\_\_\_\_, \_\_\_\_\_

11774

\_\_\_\_\_, \_\_\_\_\_, \_\_\_\_\_, \_\_\_\_\_ (as per location code  
format above)

11775

11776

11777

11778

Extraprostatic extension:  No     Yes     Equivocal \_\_\_\_\_

11779

11780

**Target 2:**

11781

Present (Y/N): \_\_\_\_\_

11782

Overall Pi-Rads Score(1-5): \_\_\_\_\_ Your Likert Score(1-5): \_\_\_\_\_

11783

Pi-Rads Score (T2) (1-5) : \_\_\_\_\_ Pi-Rads Score (DWI) (1-5): \_\_\_\_\_

11784

Mean ADC: \_\_\_\_\_ Min ADC – single voxel: \_\_\_\_\_ mm<sup>2</sup>/s

11785

x10<sup>-6</sup>  
Size: \_\_\_\_\_ x \_\_\_\_\_ x \_\_\_\_\_ mm (Ax1 > Ax2 x SI)

11786

11787

11788 Location(s) (largest to smallest area involved):  
 11789 \_\_\_\_\_/\_\_\_\_\_/\_\_\_\_\_/\_\_\_\_\_  
 11790 \_\_\_\_\_/\_\_\_\_\_/\_\_\_\_\_/\_\_\_\_\_ (as per location code  
 11791 format above)  
 11792 Extraprostatic extension:  No  Yes  Equivocal  
 11793  
 11794

11795 **Target 3:**

11796 Present (Y/N): \_\_\_\_\_  
 11797 Overall Pi-Rads Score(1-5): \_\_\_\_\_ Your Likert Score(1-5): \_\_\_\_\_  
 11798 Pi-Rads Score (T2) (1-5) : \_\_\_\_\_ Pi-Rads Score (DWI) (1-5): \_\_\_\_\_  
 11799 Mean ADC: \_\_\_\_\_ Min ADC – single voxel: \_\_\_\_\_ mm<sup>2</sup>/s  
 11800 x10<sup>-6</sup>

11801 Size: \_\_\_\_\_x\_\_\_\_\_x\_\_\_\_\_mm (Ax1 > Ax2 x SI)  
 11802 Location(s) (largest to smallest area involved):  
 11803 \_\_\_\_\_/\_\_\_\_\_/\_\_\_\_\_/\_\_\_\_\_  
 11804 \_\_\_\_\_/\_\_\_\_\_/\_\_\_\_\_/\_\_\_\_\_ (as per location code  
 11805 format above)  
 11806

11807 Extraprostatic extension:  No  Yes  Equivocal  
 11808

11809 There are more than 3 targets seen (Y/N): \_\_\_\_\_  
 11810 If yes give describe:

11811 \_\_\_\_\_  
 11812 \_\_\_\_\_  
 11813 \_\_\_\_\_

11814 **Section B:**

|                                                                                                                  |                                                                                                                  |
|------------------------------------------------------------------------------------------------------------------|------------------------------------------------------------------------------------------------------------------|
| <b>LSV invasion:</b> <input type="checkbox"/> No <input type="checkbox"/> Yes <input type="checkbox"/> Equivocal | <b>RSV invasion:</b> <input type="checkbox"/> No <input type="checkbox"/> Yes <input type="checkbox"/> Equivocal |
| <b>Adenopathy:</b> <input type="checkbox"/> No <input type="checkbox"/> Yes <input type="checkbox"/> Equivocal   | <b>Worst PI-RADS Score:</b> _____                                                                                |

11816  
 11817  
 11818  
 11819  
 11820  
 11821  
 11822  
 11823

Other Findings:

|       |      |       |      |       |      |                |       |    |
|-------|------|-------|------|-------|------|----------------|-------|----|
| _____ | (SI) | _____ | (AP) | _____ | (LR) | <b>Volume:</b> | _____ | cc |
| cm    | x    | cm    | x    | cm    |      |                |       |    |

11824  
 11825  
 11826  
 11827  
 11828  
 11829  
 11830  
 11831  
 11832  
 11833

11834  
11835  
11836  
11837  
11838  
11839  
11840

---

DCE (Part 2 or 2) – T2/DWI/ADC/DCE  
**VIEW DCE – YOU SHOULD NOT KNOW THE PSA**

**Image quality  
of DCE + DWI +  
T2:**

- Good**
- Minor image quality issues (still acceptable)**
- Unacceptable but some lesions seen warranting biopsy**
- Unacceptable, can't interpret at all**

11841  
11842  
11843  
11844  
11845  
11846  
11847

If image quality is not good please comment:

---

---

---

11848

Number of candidate tumor sites: \_\_\_\_\_

11849

**If none, please proceed to Section C**

11850

11851

There was a change in lesions number or rank when adding DCE

11852

sequence:  No  Yes

11853

If Yes, please give the correspondence between Target numbers

11854

with and without DCE (i.e. Target 1 without DCE = Target x with

11855

DCE) and **fill in all fields below to avoid confusion. Also draw**

11856

**lesions on diagram below again**

11857

11858

**Also draw lesions on diagram on next page again.**

11859

11860

11861

11862

**Correspondence:**

11863

Old T1 = New T\_\_\_\_\_

Old T2 = New T\_\_\_\_\_

Old T3 = New

11864

T\_\_\_\_\_

11865

11866

11867

11868

11869

11870

11871

11872

11873

11874

11875

11876

11877  
 11878  
 11879  
 11880  
 11881  
 11882  
 11883  
 11884  
 11885  
 11886

**If there is change from Part 1 please redraw all lesions on diagram below annotating each with the T index (i.e T1; T2...)**

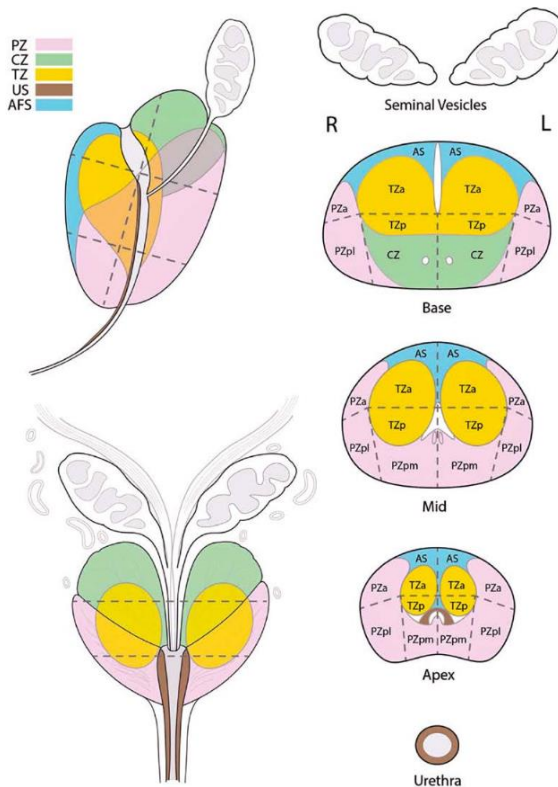

11887

**Target 1:**

Present:  No  Yes

Change from Part 1:  No  Yes

**If YES, complete ALL sections below**

**If NO change in scores, ONLY complete DCE PiRads score below.**

**All other entries are assumed = to Part 1**

Overall Pi-Rads Score: \_\_\_\_\_ Your Likert Score: \_\_\_\_\_

Pi-Rads Score (T2) : \_\_\_\_\_ Pi-Rads Score (DWI): \_\_\_\_\_

**Pi-Rads Score (DCE, 0,1): \_\_\_\_\_**

11897

Mean ADC: \_\_\_\_\_ Min ADC – single voxel: \_\_\_\_\_ mm<sup>2</sup>/s  
 x10<sup>-6</sup>

Size: \_\_\_\_\_ x \_\_\_\_\_ x \_\_\_\_\_ mm (Ax1 > Ax2 x SI)

Location(s) (largest to smallest area involved):

\_\_\_\_\_, \_\_\_\_\_, \_\_\_\_\_, \_\_\_\_\_

\_\_\_\_\_, \_\_\_\_\_, \_\_\_\_\_, \_\_\_\_\_

Extraprostatic extension:  No  Yes  Equivocal

11905

11906  
11907  
11908  
11909  
11910  
11911  
11912  
11913  
11914  
11915  
11916  
11917  
11918  
11919  
11920  
11921  
11922  
11923  
11924  
11925  
11926  
11927  
11928  
11929  
11930  
11931  
11932  
11933  
11934  
11935  
11936  
11937  
11938  
11939  
11940  
11941  
11942  
11943  
11944  
11945  
11946  
11947  
11948  
11949  
11950  
11951  
11952  
11953  
11954  
11955  
11956

---

**Target 2:**

Present:  No  Yes

Change from Part 1:  No  Yes

**If YES, complete ALL sections below**

**If NO change in scores, ONLY complete DCE PiRads score below.**

**All other entries are assumed = to Part 1**

Overall Pi-Rads Score: \_\_\_\_\_ Your Likert Score: \_\_\_\_\_

Pi-Rads Score (T2) : \_\_\_\_\_ Pi-Rads Score (DWI): \_\_\_\_\_

**Pi-Rads Score (DCE, 0,1):** \_\_\_\_\_

Mean ADC: \_\_\_\_\_ Min ADC – single voxel: \_\_\_\_\_ mm<sup>2</sup>/s  
x10<sup>-6</sup>

Size: \_\_\_\_\_x\_\_\_\_\_ x \_\_\_\_\_mm (Ax1 > Ax2 x SI)

Location(s) (largest to smallest area involved):

\_\_\_\_\_ / \_\_\_\_\_ / \_\_\_\_\_ / \_\_\_\_\_

\_\_\_\_\_ / \_\_\_\_\_ / \_\_\_\_\_ / \_\_\_\_\_

Extraprostatic extension:  No  Yes  Equivocal

**Target 3:**

Present:  No  Yes

Change from Part 1:  No  Yes

**If YES, complete ALL sections below**

**If NO change in scores, ONLY complete DCE PiRads score below.**

**All other entries are assumed = to Part 1**

Overall Pi-Rads Score: \_\_\_\_\_ Your Likert Score: \_\_\_\_\_

Pi-Rads Score (T2) : \_\_\_\_\_ Pi-Rads Score (DWI): \_\_\_\_\_

**Pi-Rads Score (DCE, 0,1):** \_\_\_\_\_

Mean ADC: \_\_\_\_\_ Min ADC – single voxel: \_\_\_\_\_ mm<sup>2</sup>/s  
x10<sup>-6</sup>

Size: \_\_\_\_\_x\_\_\_\_\_ x \_\_\_\_\_mm (Ax1 > Ax2 x SI)

Location(s) (largest to smallest area involved):

\_\_\_\_\_ / \_\_\_\_\_ / \_\_\_\_\_ / \_\_\_\_\_

\_\_\_\_\_ / \_\_\_\_\_ / \_\_\_\_\_ / \_\_\_\_\_

Extraprostatic extension:  No  Yes

There are more than 3 targets seen (Y/N): \_\_\_\_\_

If yes give describe:

\_\_\_\_\_

\_\_\_\_\_

\_\_\_\_\_

\_\_\_\_\_

Section C:

**LSV invasion:**  No  Yes  Equivocal

**RSV invasion:**  No  Yes   
Equivocal





12009  
12010

---

12011 **Appendix 3: Example of systematic TRUS guided biopsy schema**

12012

12013 Figure depicting 12-core systematic TRUS guided biopsyschema that sites are  
12014 recommended to follow. Axial/coronal sections of a prostate gland (left) showing  
12015 biopsy courses of the 12 biopsies performed under ultrasound guidance with an end  
12016 fire probe. Upperright: axial planes in the sagittal view. a, base; b, mid-gland; c,

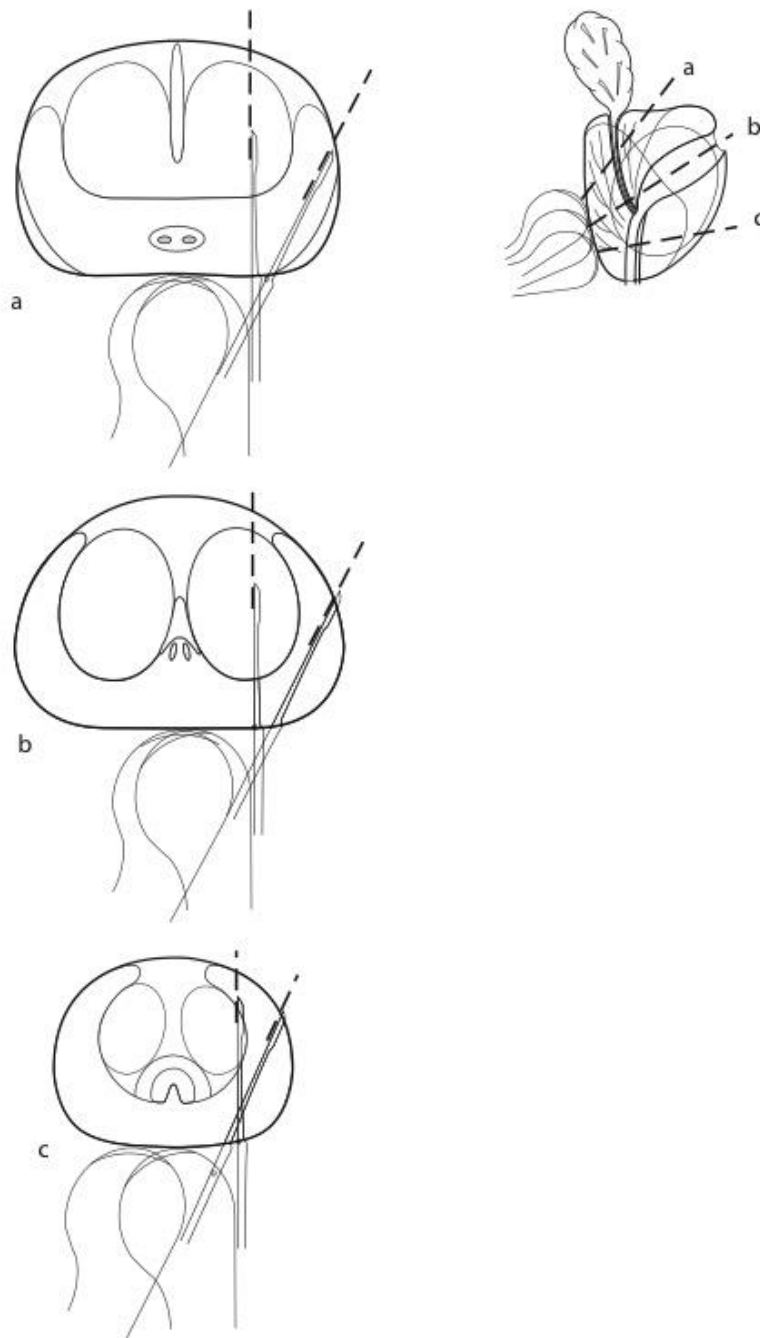

12018

12019 **Appendix 4: 2-page EQ-5D-5L Questionnaire**

12020 Under each heading, please tick the ONE box that best describes your health TODAY

12021

12022 **MOBILITY**

12023 I have no problems in walking about

12024 I have slight problems in walking about

- 
- 12025 I have moderate problems in walking about
- 12026 I have severe problems in walking about
- 12027 I am unable to walk about
- 12028
- 12029 **SELF-CARE**
- 12030 I have no problems washing or dressing myself
- 12031 I have slight problems washing or dressing myself
- 12032 I have moderate problems washing or dressing myself
- 12033 I have severe problems washing or dressing myself
- 12034 I am unable to wash or dress myself
- 12035
- 12036 **USUAL ACTIVITIES** (*e.g. work, study, housework,*  
12037 *family or leisure activities*)
- 12038 I have no problems doing my usual activities
- 12039 I have slight problems doing my usual activities
- 12040 I have moderate problems doing my usual activities
- 12041 I have severe problems doing my usual activities
- 12042 I am unable to do my usual activities
- 12043
- 12044 **PAIN / DISCOMFORT**
- 12045 I have no pain or discomfort
- 12046 I have slight pain or discomfort
- 12047 I have moderate pain or discomfort
- 12048 I have severe pain or discomfort
- 12049 I have extreme pain or discomfort
- 12050
- 12051 **ANXIETY / DEPRESSION**
- 12052 I am not anxious or depressed
- 12053 I am slightly anxious or depressed
- 12054 I am moderately anxious or depressed
- 12055 I am severely anxious or depressed
- 12056 I am extremely anxious or depressed
- 12057
- 12058 © 1990 EuroQol Group. EQ-5D™ is a trade mark of the EuroQol Group

12059

12060 • We would like to know how good or bad your health  
12061 is TODAY.

The best health  
you can imagine

12062 • This scale is numbered from 0 to 100.

12063 • 100 means the best health you can imagine.

12064 0 means the worst health you can imagine.

12065 • Mark an X on the scale to indicate how your health is  
12066 TODAY.

12067 • Now, please write the number you marked on the  
12068 scale in the box below.

12069

12070

12071

12072

12073

12074

YOUR HEALTH TODAY=

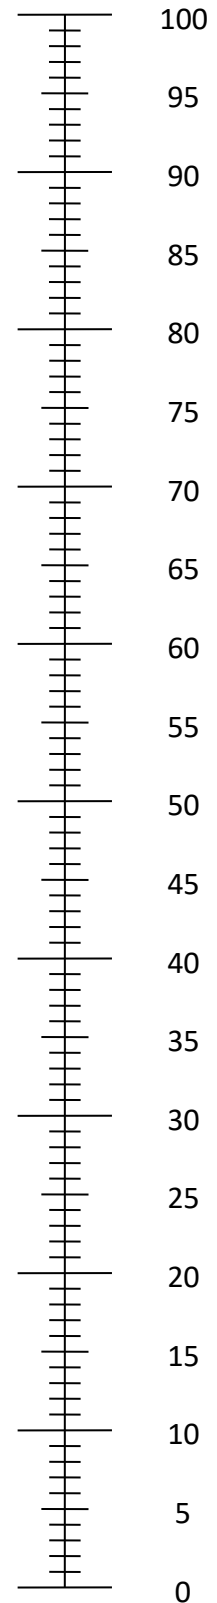

The worst health  
you can imagine

---

## Appendix 5: Immediate post biopsy questionnaire

### Immediate post-biopsy questionnaire

*Please ask the patient to fill this out after the biopsy, before they leave the department.*

Please tick the box corresponding to the number, which describes how you felt immediately after the biopsy procedure:

1. Overall, how much discomfort did the biopsy procedure cause you?

|                          |                          |                          |                            |                          |                          |                          |                          |                                  |                          |                          |
|--------------------------|--------------------------|--------------------------|----------------------------|--------------------------|--------------------------|--------------------------|--------------------------|----------------------------------|--------------------------|--------------------------|
| 0                        | 1                        | 2                        | 3                          | 4                        | 5                        | 6                        | 7                        | 8                                | 9                        | 10                       |
| <input type="checkbox"/> | <input type="checkbox"/> | <input type="checkbox"/> | <input type="checkbox"/>   | <input type="checkbox"/> | <input type="checkbox"/> | <input type="checkbox"/> | <input type="checkbox"/> | <input type="checkbox"/>         | <input type="checkbox"/> | <input type="checkbox"/> |
| <b>No Discomfort</b>     |                          |                          | <b>Moderate Discomfort</b> |                          |                          |                          |                          | <b>Worst Discomfort Possible</b> |                          |                          |

2. Overall, how much pain did the biopsy procedure cause you?

|                          |                          |                          |                          |                          |                          |                          |                          |                            |                          |                          |
|--------------------------|--------------------------|--------------------------|--------------------------|--------------------------|--------------------------|--------------------------|--------------------------|----------------------------|--------------------------|--------------------------|
| 0                        | 1                        | 2                        | 3                        | 4                        | 5                        | 6                        | 7                        | 8                          | 9                        | 10                       |
| <input type="checkbox"/>   | <input type="checkbox"/> | <input type="checkbox"/> |
| <b>No Pain</b>           |                          |                          | <b>Moderate Pain</b>     |                          |                          |                          |                          | <b>Worst pain Possible</b> |                          |                          |

- ?
- ?
- ?
- ?
- ?
- ?
- ?
- ?
- ?
- ?
- ?
- ?
- ?
- ?
- ?
- ?
- ?
- ?
- ?
- ?
- ?

**Please complete the next page of questions**

---

Did you experience any of the following in the month **before** your biopsy procedure.  
For each question, tick the box that applies:

3. Fevers

Yes  
  
1

No  
  
2

4. Blood in the urine

Yes  
  
1

No  
  
2

5. Blood in the semen

Yes  
  
1

No  
  
2

6. Blood in the stools or from the back passage

Yes  
  
1

No  
  
2

7. Acute urinary retention, meaning the painful inability to pass urine which was relieved by passing a catheter into the bladder through the penis

Yes  
  
1

No  
  
2

8. Erectile dysfunction, meaning the persistent inability to get and maintain an erection sufficient to allow satisfactory sexual performance

Yes  
  
1

No  
  
2

9. Urinary incontinence, meaning any undesired leakage of urine

Yes  
  
1

No  
  
2

10. Urinary tract infection diagnosed by a healthcare professional

Yes  
  
1

No  
  
2

11. Pain at the site where the biopsies were taken from

Yes  
  
1

No  
  
2

**Thank you for completing the questionnaire. Please hand this to a member of staff before you leave. Please ensure you are given the 30-day questionnaire for completion at 30 days following the biopsy.**

12078

**Appendix 6: 30-day post biopsy questionnaire**

**30-day post biopsy questionnaire**

30-days after the biopsy procedure, the patient should complete this questionnaire:

Did you experience the following problem in the 30-days after the biopsy procedure:

1. Fevers

Yes  No

1 2

2. If you answered yes, specify on which days after the biopsy you had this? (*tick as many boxes as are applicable*)

Days: 0-2 3-5 6-10 11-15 16-20 21-30

|   |   |   |   |   |   |
|---|---|---|---|---|---|
|   |   |   |   |   |   |
| 1 | 2 | 3 | 4 | 5 | 6 |

3. If you answered yes, how much of a problem was this for you? (*tick one box*)

Not a problem at all Minor Problem Moderate Problem Major Problem

1 2 3 4

Did you experience the following problem in the 30-days after the biopsy procedure:

4. Blood in the urine

Yes  No

1 2

5. If you answered yes, specify on which days after the biopsy you had this? (*tick as many boxes as are applicable*)

Days: 0-2 3-5 6-10 11-15 16-20 21-30

|   |   |   |   |   |   |
|---|---|---|---|---|---|
|   |   |   |   |   |   |
| 1 | 2 | 3 | 4 | 5 | 6 |

6. If you answered yes, how much of a problem was this for you? (*tick one box*)

Not a problem at all Minor Problem Moderate Problem Major Problem

1 2 3 4

Did you experience the following problem in the 30-days after the biopsy procedure:

7. Blood in the semen

Yes  No

1 2

8. If you answered yes, specify on which days after the biopsy you had this? (*tick as many boxes as are applicable*)

Days: 0-2 3-5 6-10 11-15 16-20 21-30

|   |   |   |   |   |   |
|---|---|---|---|---|---|
|   |   |   |   |   |   |
| 1 | 2 | 3 | 4 | 5 | 6 |

9. If you answered yes, how much of a problem was this for you? (*tick one box*)

Not a problem at all Minor Problem Moderate Problem Major Problem

1 2 3 4



Did you experience the following problem in the 30-days after the biopsy procedure:

10. Blood in the stools or from the back passage

Yes  No   
1 2

11. If you answered yes, how long after the biopsy did you have this for? (*tick one*)

Days: 0-2 3-5 6-10 11-15 16-20 21-30

|                          |                          |                          |                          |                          |                          |
|--------------------------|--------------------------|--------------------------|--------------------------|--------------------------|--------------------------|
| <input type="checkbox"/> |
| 1                        | 2                        | 3                        | 4                        | 5                        | 6                        |

12. If you answered yes, how much of a problem was this for you? (*tick one box*)

Not a problem at all Minor Problem Moderate Problem Major Problem

|                          |                          |                          |                          |
|--------------------------|--------------------------|--------------------------|--------------------------|
| <input type="checkbox"/> | <input type="checkbox"/> | <input type="checkbox"/> | <input type="checkbox"/> |
| 1                        | 2                        | 3                        | 4                        |

Did you experience the following problem in the 30-days after the biopsy procedure:

13. Acute urinary retention, meaning the painful inability to pass urine which was relieved by passing a catheter into the bladder through the penis

Yes  No   
1 2

14. If you answered yes, how long after the biopsy did this occur? (*tick one*)

Days: 0-2 3-5 6-10 11-15 16-20 21-30

|                          |                          |                          |                          |                          |                          |
|--------------------------|--------------------------|--------------------------|--------------------------|--------------------------|--------------------------|
| <input type="checkbox"/> |
| 1                        | 2                        | 3                        | 4                        | 5                        | 6                        |

15. If you answered yes, how much of a problem was this for you? (*tick one box*)

Not a problem at all Minor Problem Moderate Problem Major Problem

|                          |                          |                          |                          |
|--------------------------|--------------------------|--------------------------|--------------------------|
| <input type="checkbox"/> | <input type="checkbox"/> | <input type="checkbox"/> | <input type="checkbox"/> |
| 1                        | 2                        | 3                        | 4                        |

Did you experience the following problem in the 30-days after the biopsy procedure:

16. Erectile dysfunction, meaning the persistent inability to get and maintain an erection sufficient to allow satisfactory sexual performance

Yes  No   
1 2

17. If you answered yes, how long after the biopsy did you have this for? (*tick one*)

Days: 0-2 3-5 6-10 11-15 16-20 21-30

|                          |                          |                          |                          |                          |                          |
|--------------------------|--------------------------|--------------------------|--------------------------|--------------------------|--------------------------|
| <input type="checkbox"/> |
| 1                        | 2                        | 3                        | 4                        | 5                        | 6                        |

18. If you answered yes, how much of a problem was this for you? (*tick one box*)

Not a problem at all Minor Problem Moderate Problem Major Problem

|                          |                          |                          |                          |
|--------------------------|--------------------------|--------------------------|--------------------------|
| <input type="checkbox"/> | <input type="checkbox"/> | <input type="checkbox"/> | <input type="checkbox"/> |
| 1                        | 2                        | 3                        | 4                        |

12081

Did you experience the following problem in the 30-days after the biopsy procedure:

19. Urinary incontinence, meaning any undesired leakage of urine

Yes  No   
1 2

20. If you answered yes, how long after the biopsy did you have this for? (*tick one*)

Days: 0-2 3-5 6-10 11-15 16-20 21-30

|                          |                          |                          |                          |                          |                          |
|--------------------------|--------------------------|--------------------------|--------------------------|--------------------------|--------------------------|
| <input type="checkbox"/> |
| 1                        | 2                        | 3                        | 4                        | 5                        | 6                        |

21. If you answered yes, how much of a problem was this for you? (*tick one box*)

Not a problem at all Minor Problem Moderate Problem Major Problem

1 2 3 4

Did you experience the following problem in the 30-days after the biopsy procedure:

22. Urinary tract infection diagnosed by a healthcare professional

Yes  No   
1 2

23. If you answered yes, how long after the biopsy did this occur after? (*tick one*)

Days: 0-2 3-5 6-10 11-15 16-20 21-30

|                          |                          |                          |                          |                          |                          |
|--------------------------|--------------------------|--------------------------|--------------------------|--------------------------|--------------------------|
| <input type="checkbox"/> |
| 1                        | 2                        | 3                        | 4                        | 5                        | 6                        |

24. If you answered yes, how much of a problem was this for you? (*tick one box*)

Not a problem at all Minor Problem Moderate Problem Major Problem

1 2 3 4

Did you experience the following problem in the 30-days after the biopsy procedure:

25. Pain at the site where the biopsies were taken from

Yes  No   
1 2

26. If you answered yes, how long after the biopsy did you have this for? (*tick one*)

Days: 0-2 3-5 6-10 11-15 16-20 21-30

|                          |                          |                          |                          |                          |                          |
|--------------------------|--------------------------|--------------------------|--------------------------|--------------------------|--------------------------|
| <input type="checkbox"/> |
| 1                        | 2                        | 3                        | 4                        | 5                        | 6                        |

27. If you answered yes, how much of a problem was this for you? (*tick one box*)

Not a problem at all Minor Problem Moderate Problem Major Problem

1 2 3 4

12082

28. Please list any **new** medications that you have taken **since the biopsy**. Do not list your regular medications but do list any **new** medications started related to the biopsy. Think especially about any painkillers or antibiotics that you may have taken. Only list the medications if you have taken them. An example is given in the first box:

| Name of medication        | Dosage       | Number of doses per day | Number of days |
|---------------------------|--------------|-------------------------|----------------|
| <i>e.g. ciprofloxacin</i> | <i>500mg</i> | <i>2</i>                | <i>3</i>       |
|                           |              |                         |                |
|                           |              |                         |                |
|                           |              |                         |                |
|                           |              |                         |                |
|                           |              |                         |                |
|                           |              |                         |                |
|                           |              |                         |                |

29. Since the biopsy, have you had contacts with hospital services for reasons related to the biopsy, which were unplanned and not part of the routine study visits?

*Please answer yes if you have had any unplanned contact with any healthcare staff e.g. doctor, nurse, other. Please also answer yes if you have had any unplanned consultations with healthcare staff over the phone*

Yes

No

1

2

30. If yes, please answer describe:

(i) who the contact was with (*e.g. nurse/doctor/other*)

(ii) reason for contact (*e.g. concern over fevers*)

(iii) manner of contact (*e.g. telephone/attendance at outpatient clinic/attendance in accident and emergency*)

(iv) any treatment you received (please be as specific as possible *e.g. "I was admitted to the ward and treated for an infection of the blood stream for 5 days of intravenous antibiotics with 1.2g co-amoxiclav three times a day and I had 2 days of painkillers with intravenous paracetamol 1g four times a day"*):

12083

31. How many times, if any, have you attended the accident and emergency department?

32. How many nights, if any, have you been admitted to hospital as an inpatient?

33. How many days, if any, have you been admitted to a day ward in hospital without staying the night?

34. How many days, if any, have you been admitted to an intensive care unit for?

35. Since the biopsy, have you had contact with the community healthcare team for reasons related to the biopsy?

*Please answer yes if you have had any contact with any healthcare staff in the community e.g. GP, practice nurse, community nurse, other. Please also answer yes if you have had any consultations with community healthcare staff over the phone*

Yes

1

No

2

36. If yes, please answer describe:

(i) who the contact was with (e.g. nurse/doctor/other)

(ii) reason for contact (e.g. concern over fevers)

(iii) manner of contact (e.g. telephone/attendance at GP surgery/home visit)

(iv) any treatment you received (please be as specific as possible e.g. "I received 5 days of oral antibiotics for a urinary tract infection- 625mg co-amoxiclav three times a day and I had 2 days of painkillers with paracetamol 1g four times a day"):

12084

12085

37. Have you felt unwell in any other way that we have not asked that you feel is due to the biopsy?

Yes  
  
1

No  
  
2

38. If you answered yes, please describe:

39. If you answered yes, how long after the biopsy did you have this for? (*tick one*)

|                          |                          |                          |                          |                          |                          |
|--------------------------|--------------------------|--------------------------|--------------------------|--------------------------|--------------------------|
| Days: 0-2                | 3-5                      | 6-10                     | 11-15                    | 16-20                    | 21-30                    |
| <input type="checkbox"/> |
| 1                        | 2                        | 3                        | 4                        | 5                        | 6                        |

40. If you answered yes, how much of a problem was this for you? (*tick one box*)

Not a problem

at all  
  
1

Minor Problem

2

Moderate Problem

3

Major Problem

4

41. If **another biopsy** in the future was medically necessary, how much of a problem would it be for you to undergo the same procedure? (*tick one box*)

Not a problem

at all  
  
1

Minor Problem

2

Moderate Problem

3

Major Problem

4

?

?

**Thank you for completing the questionnaire. Please post the questionnaire in the pre-paid self-addressed envelope or give to the research team at your next visit. Please contact us if you have any queries.**

?

12086  
12087

12088 April 10, 2018

12089

**PRECISE Trial: Amendment 4**

12090

**Protocol version 5.0: 10 April 2018**

12091

**Summary of Changes**

12092

12093 Minor administrative changes were made throughout the current protocol to avoid  
12094 discrepancy. Minor errors were corrected.

12095 The following changes were made:

12096

- **Version date to reflect:** Amendment 4: 10 April 2018

12097

- **The following has been amended throughout the protocol:** *Inclusion criteria:*

12098

Addition of stipulation: Serum PSA  $\leq$  20ng/ml; **within 3 months of**

12099

**randomization**

12100

**Rationale:** to clarify the need for PSA at screening, without duplicating PSA  
12101 bloodwork

12102

12103

- **ADDITION of EOS/Withdrawal visit on Table 1, 2, 3:** now includes:

12104

EOS/Withdrawal visit, documenting all requirements for this visit.

12105

**Rationale:** to clarify/separate what is needed at a withdrawal visit, and  
12106 EOS study visit independent of the study completion.

12107

- **ADDITION of stipulation to section 10.11.1 Indications for biopsies**  
12108 **off protocol:**

12109

*now includes:* Subjects should continue to be followed with semi-annual

12110

PSA and DRE (not required, at the discretion of the PI).

12111

**Rationale:** to clarify that the DRE is not mandatory and left up to the  
12112 discretion of the PI.

12113

- **ADDITION of tumour bank information to section 10.12.2**  
12114 **Correlative Science Component:**

12115

*the following has been added:* Biomaterial will be stored, anonymized, at

12116

the Ontario Institute of Cancer Research (OICR) Biobank, under the

12117

direction of Dr. John Bartlett. Dr. Bartlett is the Program Director,

12118

[Diagnostic Development](#), at OICR. The material will not be used for

12119

commercial purposes. No personal information will be kept at

12120

OICR. Personal identifying information on the patients in the PRECISE

12121

trial is held by the Ontario Clinical Oncology Group (OCOG), who are

12122

performing the data management function for the study. Access to the

12123

biomaterial will be under the control of the PRECISE steering

12124

committee. Access has already been approved for the Translational

12125

Research in Prostate Cancer (TRIPC) research group led by Dr. Paul

12126

Boutros. Future researchers interested in using the biomaterial will apply

12127

to the Precise steering committee for approval, based on the scientific

12128

merit of the study.

12129

**Rationale:** to provide more information regarding the storage of samples

12130

at OICR.

12131

- **ADDITION of vendor information to section 10.12.2 Correlative**  
12132 **Science Component:**

12133

*The following has been added (3D Signatures):* The urine samples will be

12134

used to establish the sensitivity of the procedures and the precision of the

12135

analytic algorithms to identify those with significant prostate cancer.

---

12136 The long term goal of the project is to develop a non-invasive  
12137 methodology that can be used to identify genetic alterations that identify  
12138 a group of patients at high risk for clinically significant prostate cancer.  
12139 **Rationale:** to provide more information regarding the 3D Signatures  
12140 collection purposes.  
12141 July 24, 2018  
12142

12143  
12144  
12145  
12146  
12147  
12148  
12149  
12150  
12151  
12152  
12153  
12154  
12155  
12156  
12157  
12158  
12159  
12160  
12161  
12162  
12163  
12164  
12165  
12166  
12167  
12168  
12169  
12170  
12171  
12172  
12173  
12174  
12175  
12176  
12177  
12178  
12179  
12180  
12181  
12182  
12183  
12184  
12185  
12186  
12187

---

**1. Title Page**

*Full title:*

**A phase III multi-centre open-label randomized controlled trial of multi-parametric magnetic resonance imaging (MRI)-targeted biopsy compared to systematic trans-rectal ultrasound (TRUS) guided biopsy for the diagnosis of prostate cancer in men without prior biopsy.**

**4. Short title: Prostate Evaluation for Clinically Important disease: MRI vs Standard Evaluation procedures. (PRECISE)**

**Date: 10 April 2018**

**Version 5.0**

**Sponsor:**

Canadian Urology Research Consortium (CURC)

**Principal Investigator:**

Dr. Laurence Klotz  
Professor of Surgery, University of Toronto  
Sunnybrook Health Sciences Centre  
2075 Bayview Avenue, #MG 408  
Toronto Ontario M4N3M5 Canada  
Voice 416 480 4673  
Fax 416 480 6121

**Co-Principal Investigators:**

Dr. Masoom A. Haider  
Sunnybrook Health Sciences Centre  
2075 Bayview Avenue, Room AG 57  
Toronto Ontario M4N 3M5 Canada  
  
Dr. Andrew Loblaw  
Sunnybrook Health Sciences Centre  
2075 Bayview Avenue, Room T2 161  
Toronto Ontario M4N 3M5 Canada

**Co- Investigators:**

Dr. Laurent Milot  
Sunnybrook Health Sciences Centre  
2075 Bayview Avenue, Room AG 279  
Toronto Ontario M4N 3M5 Canada  
  
Dr. Craig Earle



---

12188 Sunnybrook Health Sciences Centre  
12189 2075 Bayview Avenue  
12190 Toronto Ontario M4N 3M5 Canada

12191  
12192

12193 **Confidential**

12194 The information provided in this document is strictly confidential and is intended  
12195 solely for the guidance of the clinical investigation. Reproduction or disclosure of this  
12196 document - whether in part or in full - to parties not associated with the clinical  
12197 investigation, or its use for any other purpose, without the prior written consent of  
12198 the PI is not permitted.

12199  
12200

12201 **2. Signature of Investigators**

12202

12203 **A phase III multi-centre open-label randomized controlled trial of**  
12204 **multi-parametric magnetic resonance imaging (MRI)-targeted biopsy**  
12205 **compared to systematic trans-rectal ultrasound (TRUS) guided biopsy**  
12206 **for the diagnosis of prostate cancer in men without prior biopsy.**

12207

12208 **Date: 10 April 2018**

12209 **Version 5.0**

12210  
12211  
12212

12213 The signatory agrees to the content of the final clinical study protocol as presented.

12214  
12215

12216 Signature: \_\_\_\_\_

12217

12218 Name: \_\_\_\_\_

12219

12220 Title: \_\_\_\_\_

12221

12222 Date: \_\_\_\_\_

12223

12224 Site name: \_\_\_\_\_

12225  
12226  
12227

### 3. Synopsis

|                      |                                                                                                                                                                                                                                                                                                                                                                                                                                                                                                                                                                                                                                                                                                                                                                                                                                                                                                                                                                                                                                                                                                                                                                                                                                                                                                                                                                                                                                                                                                                                                                                                                                                                                                                                                                                                                                                                                            |
|----------------------|--------------------------------------------------------------------------------------------------------------------------------------------------------------------------------------------------------------------------------------------------------------------------------------------------------------------------------------------------------------------------------------------------------------------------------------------------------------------------------------------------------------------------------------------------------------------------------------------------------------------------------------------------------------------------------------------------------------------------------------------------------------------------------------------------------------------------------------------------------------------------------------------------------------------------------------------------------------------------------------------------------------------------------------------------------------------------------------------------------------------------------------------------------------------------------------------------------------------------------------------------------------------------------------------------------------------------------------------------------------------------------------------------------------------------------------------------------------------------------------------------------------------------------------------------------------------------------------------------------------------------------------------------------------------------------------------------------------------------------------------------------------------------------------------------------------------------------------------------------------------------------------------|
| Title                | A phase III multi-centre, open-label randomized controlled trial of multi-parametric magnetic resonance imaging (MRI)-targeted biopsy compared to systematic trans-rectal ultrasound (TRUS) guided biopsy for the diagnosis of prostate cancer in men without prior biopsy.                                                                                                                                                                                                                                                                                                                                                                                                                                                                                                                                                                                                                                                                                                                                                                                                                                                                                                                                                                                                                                                                                                                                                                                                                                                                                                                                                                                                                                                                                                                                                                                                                |
| Short Title          | <u>P</u> rostate <u>E</u> valuation for <u>C</u> linically <u>I</u> mportant disease: MRI vs <u>S</u> tandard <u>E</u> valuation procedures. (PRECISE)                                                                                                                                                                                                                                                                                                                                                                                                                                                                                                                                                                                                                                                                                                                                                                                                                                                                                                                                                                                                                                                                                                                                                                                                                                                                                                                                                                                                                                                                                                                                                                                                                                                                                                                                     |
| Clinical study phase | Phase III                                                                                                                                                                                                                                                                                                                                                                                                                                                                                                                                                                                                                                                                                                                                                                                                                                                                                                                                                                                                                                                                                                                                                                                                                                                                                                                                                                                                                                                                                                                                                                                                                                                                                                                                                                                                                                                                                  |
| Study Objectives     | <p><b>Primary Objective</b></p> <p>To determine whether the proportion of men with clinically significant cancer (Gleason <math>\geq 7</math>) detected by MRI-targeted biopsy is no less than systematic TRUS guided biopsy.</p> <p><b>Secondary Objectives</b></p> <p>53. To determine whether the proportion of men with clinically significant cancer (Gleason <math>\geq 7</math>) detected by MRI-targeted biopsy is greater than systematic TRUS guided biopsy.</p> <p>54. Proportion of men in each arm with clinically insignificant cancer detected.</p> <p>55. Proportion of men in each arm with Gleason <math>\geq 4+3</math> detected.</p> <p>56. Proportion of men in MRI arm who avoid biopsy.</p> <p>57. Proportion of men in the MRI arm whom the PI-RADS score for suspicion of clinically significant cancer was 3, 4 or 5 but no clinically significant cancer was detected.</p> <p>58. Proportion of men in each arm who go on to definitive local treatment (e.g. radical prostatectomy, radiotherapy, brachytherapy) or systemic treatment (e.g. hormone therapy, chemotherapy).</p> <p>59. Proportion of men in each arm who do not have significant cancer found at baseline who develop a positive MRI and/or have a progressive lesion found on MRI and/or have Gleason <math>\geq 7</math> cancer detected on a repeat biopsy (systematic or targeted) by 2 years</p> <p>60. Proportion of men with post-biopsy adverse events</p> <p>61. Health-related quality of life scores.</p> <p>62. Proportion with Gleason grade upgrading in men undergoing radical prostatectomy.</p> <p>63. To determine the cost per diagnosis of cancer.</p> <p>64. To determine the impact of the addition of Gd based contrast compared to a non contrast abbreviated MRI protocol on target yield</p> <p>65. To determine if a radiologist Likert score not based on PI-</p> |

|                                           |                                                                                                                                                                                                                                                                                                                                                                                                                                                                                                                                                                                                                                                                                                                                                                                                                    |
|-------------------------------------------|--------------------------------------------------------------------------------------------------------------------------------------------------------------------------------------------------------------------------------------------------------------------------------------------------------------------------------------------------------------------------------------------------------------------------------------------------------------------------------------------------------------------------------------------------------------------------------------------------------------------------------------------------------------------------------------------------------------------------------------------------------------------------------------------------------------------|
|                                           | RADS has a better target yield than PI-RADS_ alone                                                                                                                                                                                                                                                                                                                                                                                                                                                                                                                                                                                                                                                                                                                                                                 |
| Test procedures                           | <p>Subjects will be randomized to either</p> <p><b>ARM A:</b> multi-parametric magnetic resonance imaging (MRI) which, depending on outcome, may be followed by (MRI)-targeted biopsy.</p> <p><b>ARM B:</b> systematic trans-rectal ultrasound (TRUS) guided biopsy.</p> <p>Subjects in both arms will complete a number of different questionnaires and will have PSA measurements taken. If subjects consent to participate in correlative studies, they will also need to provide blood, urine semen and tissue samples at pre-specified time points.</p>                                                                                                                                                                                                                                                       |
| Indication                                | Clinical suspicion of prostate cancer, based on PSA or results of digital rectal exam, with no prior biopsy.                                                                                                                                                                                                                                                                                                                                                                                                                                                                                                                                                                                                                                                                                                       |
| Diagnosis and main criteria for inclusion | <p>In order to be eligible, <u>all</u> inclusion criteria must be met.</p> <p>21. Men at least 18 years of age referred with clinical suspicion of prostate cancer who have been advised to have a prostate biopsy;</p> <p>22. <math>\geq 5\%</math> chance of high-grade prostate cancer as calculated using individualized risk assessment of prostate cancer calculator, PCPTRC 2.0, found at <a href="http://deb.uthscsa.edu/URORiskCalc/Pages/calcs.jsp">http://deb.uthscsa.edu/URORiskCalc/Pages/calcs.jsp</a>; For men under age 55, the default age of 55 should be entered on the risk calculator.</p> <p>23. Serum PSA <math>\leq 20</math>ng/ml; within 3 months of randomization</p> <p>24. Fit to undergo all procedures listed in protocol;</p> <p>25. Able to provide written informed consent.</p> |
| Exclusion Criteria                        | <p>Men who meet the following criteria at the time of screening will be excluded:</p> <p>25. Prior prostate biopsy;</p> <p>26. Prior treatment for prostate cancer;</p> <p>27. Contraindication to MRI (e.g. claustrophobia, pacemaker, estimated GFR <math>\leq 50</math>mls/min);</p> <p>28. Contraindication to prostate biopsy;</p> <p>29. Men in whom artifact would reduce the quality of the MRI; i.e, previous hip replacement surgery, metallic hip replacement or extensive pelvic orthopaedic metal work;</p> <p>30. Unfit to undergo any procedures listed in protocol.</p>                                                                                                                                                                                                                            |
| Study Design                              | This is a multi-centre open-label, randomized two arm study. Men are either randomized to receive MRI or a systematic trans-rectal ultrasound (TRUS) guided biopsy.                                                                                                                                                                                                                                                                                                                                                                                                                                                                                                                                                                                                                                                |
| Methodology                               | <p>Eligible subjects will be randomized in a 1:1 ratio to receive either (ARM A) multi-parametric magnetic resonance imaging (MRI) which, depending on outcome, may be followed by (MRI)-targeted biopsy, or (ARM B) systematic trans-rectal ultrasound (TRUS) guided biopsy. The time frame for data collection is shown in Appendix 1.</p> <p><u>All subjects</u> will have a PSA test prior to, or at Visit 1, and will</p>                                                                                                                                                                                                                                                                                                                                                                                     |

|                               |                                                                                                                                                                                                                                                                                                                                                                                                                                                                                                                                                                                                                                                                                                                                                                                                                                                                                                                                                                                                                                                                                                                                                                                                                                                                                                                                                                                                                                                                                                                                                                                                                                                                                                                                              |
|-------------------------------|----------------------------------------------------------------------------------------------------------------------------------------------------------------------------------------------------------------------------------------------------------------------------------------------------------------------------------------------------------------------------------------------------------------------------------------------------------------------------------------------------------------------------------------------------------------------------------------------------------------------------------------------------------------------------------------------------------------------------------------------------------------------------------------------------------------------------------------------------------------------------------------------------------------------------------------------------------------------------------------------------------------------------------------------------------------------------------------------------------------------------------------------------------------------------------------------------------------------------------------------------------------------------------------------------------------------------------------------------------------------------------------------------------------------------------------------------------------------------------------------------------------------------------------------------------------------------------------------------------------------------------------------------------------------------------------------------------------------------------------------|
|                               | <p>complete a baseline EQ-5D-5L questionnaire. In addition, they will contribute optional blood, urine semen and tissue samples if they consent to correlative studies.</p> <p><u>All subjects in ARM A</u> will complete an EQ-5D-5L questionnaire and an immediate post-MRI/TRUS Fusion Biopsy questionnaire following the MRI.</p> <p><u>Subjects in ARM A who do not receive a subsequent biopsy</u> will complete an EQ-5D-5L questionnaire when they find out the results of the MRI 3 weeks (<math>\pm</math> 1 week) after the procedure. They will have another MRI and PSA test 2 years after the initial MRI. When they complete the study after 2 years of follow up, they will complete another EQ-5D-5L questionnaire.</p> <p><u>Subjects in ARM A who do receive a MRI-targeted biopsy</u> will complete an immediate post-biopsy questionnaire at the time of the biopsy, another EQ-5D-5L questionnaire and a 30-day post biopsy questionnaire when they find out the results of the biopsy, 3 weeks (<math>\pm</math> 1 week) after the procedure. They will have an additional PSA test every 6 months for two years, and at the end of 2 years of follow up, they will complete another EQ-5D-5L questionnaire.</p> <p><u>All subjects in ARM B</u> will complete an immediate post-biopsy questionnaire following the standardized TRUS-guided biopsy. They will complete another EQ-5D-5L questionnaire and a 30-day post biopsy questionnaire when they find out the results of the biopsy, 3 weeks (<math>\pm</math> 1 week) after the procedure. They will have an additional PSA test every 6 months for two years, and at the end of 2 years of follow up, they will complete another EQ-5D-5L questionnaire.</p> |
| Type of control               | This is an open-label randomized study.                                                                                                                                                                                                                                                                                                                                                                                                                                                                                                                                                                                                                                                                                                                                                                                                                                                                                                                                                                                                                                                                                                                                                                                                                                                                                                                                                                                                                                                                                                                                                                                                                                                                                                      |
| Number of subjects            | This study requires 422 subjects (211 in each arm). To account for potential withdrawal / loss to follow up and the effect of stratification, the sample size will be inflated by 5%, and a target of <b>450 men</b> will be recruited.                                                                                                                                                                                                                                                                                                                                                                                                                                                                                                                                                                                                                                                                                                                                                                                                                                                                                                                                                                                                                                                                                                                                                                                                                                                                                                                                                                                                                                                                                                      |
| Primary endpoint              | The proportion of men in each arm with clinically significant cancer (Gleason $\geq$ 7) will be calculated based on histology results from biopsy procedures. Analysis will be on the per protocol study population.                                                                                                                                                                                                                                                                                                                                                                                                                                                                                                                                                                                                                                                                                                                                                                                                                                                                                                                                                                                                                                                                                                                                                                                                                                                                                                                                                                                                                                                                                                                         |
| Secondary endpoints           | See section 7.4                                                                                                                                                                                                                                                                                                                                                                                                                                                                                                                                                                                                                                                                                                                                                                                                                                                                                                                                                                                                                                                                                                                                                                                                                                                                                                                                                                                                                                                                                                                                                                                                                                                                                                                              |
| Plan for statistical analysis | See section 14.0.                                                                                                                                                                                                                                                                                                                                                                                                                                                                                                                                                                                                                                                                                                                                                                                                                                                                                                                                                                                                                                                                                                                                                                                                                                                                                                                                                                                                                                                                                                                                                                                                                                                                                                                            |
| Funding                       | The total budget for this trial is \$3,000,000. (see attached).Ontario Institute for Cancer Research (OICR) has committed to \$1,500,000 in support of this study (letter appended).We hope to obtain the additional \$1,500,000 from the Movember Accelerated Translational Research Grant Competition                                                                                                                                                                                                                                                                                                                                                                                                                                                                                                                                                                                                                                                                                                                                                                                                                                                                                                                                                                                                                                                                                                                                                                                                                                                                                                                                                                                                                                      |

12230  
12231

---

|       |                                                                                          |           |
|-------|------------------------------------------------------------------------------------------|-----------|
| 12232 | <b>Table of Contents</b>                                                                 |           |
| 12233 | <b>1. TITLE PAGE</b> .....                                                               | <b>1</b>  |
| 12234 | <b>2. SIGNATURE OF INVESTIGATORS</b> .....                                               | <b>11</b> |
| 12235 | <b>3. SYNOPSIS</b> .....                                                                 | <b>12</b> |
| 12236 | <b>4. ABBREVIATIONS AND DEFINITIONS</b> .....                                            | <b>18</b> |
| 12237 | <b>5. TRIAL SUMMARY</b> .....                                                            | <b>19</b> |
| 12238 | 5.1 AIM AND RATIONALE .....                                                              | 19        |
| 12239 | 5.2 METHODS .....                                                                        | 191       |
| 12240 | 5.3 PARTICIPATING SITES.....                                                             | 21        |
| 12241 | 5.4 STUDY OUTCOMES .....                                                                 | 21        |
| 12242 | 5.4.1 <i>Primary outcome</i> .....                                                       | 21        |
| 12243 | 5.4.2 <i>Secondary outcomes</i> .....                                                    | 21        |
| 12244 | <b>6. BACKGROUND</b> .....                                                               | <b>22</b> |
| 12245 | 6.1 PROSTATE CANCER DIAGNOSIS .....                                                      | 22        |
| 12246 | 6.2 CLINICALLY SIGNIFICANT VERSUS CLINICALLY INSIGNIFICANT PROSTATE CANCER.....          | 22        |
| 12247 | 6.3 CURRENT STANDARD OF CARE: SYSTEMATIC TRUS GUIDED BIOPSY .....                        | 23        |
| 12248 | 6.4 THE EMERGING ROLE OF MRI IN PROSTATE CANCER DIAGNOSIS AND TREATMENT .....            | 23        |
| 12249 | 6.4.1 <i>The role of imaging in prostate cancer diagnosis</i> .....                      | 23        |
| 12250 | 6.4.2 <i>Limitations of early MRI studies in prostate cancer</i> .....                   | 23        |
| 12251 | 6.4.3 <i>Emerging role of MRI in the diagnosis of prostate cancer</i> .....              | 24        |
| 12252 | 6.4.4 <i>Prostate cancer detection rates of MRI-targeted biopsy are similar to other</i> |           |
| 12253 | <i>methods</i> .....                                                                     | 26        |
| 12254 | 6.4.5 <i>Limitations of studies reporting MPMRI-targeted prostate biopsy</i> .....       | 26        |
| 12255 | 6.5 NOVELTY OF PRECISE .....                                                             | 27        |
| 12256 | <b>7. TRIAL OBJECTIVES</b> .....                                                         | <b>27</b> |
| 12257 | 7.1 OVERALL AIM .....                                                                    | 27        |
| 12258 | 7.2 HYPOTHESES .....                                                                     | 27        |
| 12259 | 7.3 PRIMARY OBJECTIVE.....                                                               | 27        |
| 12260 | 7.4 SECONDARY OBJECTIVES .....                                                           | 28        |
| 12261 | 7.5 EXPLANATION FOR NON-INFERIORITY HYPOTHESIS .....                                     | 28        |
| 12262 | 7.6 ANTICIPATED TIMELINE OF STUDY PROGRESSION .....                                      | 28        |
| 12263 | <b>8. STUDY POPULATION</b> .....                                                         | <b>29</b> |
| 12264 | 8.1 NUMBER OF SUBJECTS .....                                                             | 29        |
| 12265 | 8.2 SUBJECT INCLUSION CRITERIA .....                                                     | 29        |
| 12266 | 8.3 SUBJECT EXCLUSION CRITERIA.....                                                      | 29        |
| 12267 | <b>9. STUDY DESIGN</b> .....                                                             | <b>30</b> |
| 12268 | 9.1 STUDY DESIGN .....                                                                   | 30        |
| 12269 | 9.2 STUDY TRIAL SCHEMA.....                                                              | 31        |
| 12270 | 9.3 TIMELINE OF SUBJECT CONTACT .....                                                    | 32        |
| 12271 | <b>10. TRIAL INTERVENTIONS AND PROCEDURES</b> .....                                      | <b>36</b> |
| 12272 | 10.1 EQ-5D-5L QUESTIONNAIRES.....                                                        | 36        |
| 12273 | 10.2 MULTIPARAMETRIC MRI IMAGING PROCEDURE .....                                         | 36        |
| 12274 | 10.2.1 <i>MRI Protocol</i> .....                                                         | 36        |
| 12275 | 10.2.2 <i>MRI reporting</i> .....                                                        | 37        |
| 12276 | 10.3 NO TARGET IDENTIFIED ON MPMRI (PIRADS 1 OR 2).....                                  | 38        |
| 12277 | 10.4 MRI-TARGETED BIOPSY .....                                                           | 38        |
| 12278 | 10.4.1 <i>MRI choice of targets for targeted biopsy</i> .....                            | 38        |

|       |                                                                                      |           |
|-------|--------------------------------------------------------------------------------------|-----------|
| 12279 | 10.4.2 MRI Biopsy .....                                                              | 39        |
| 12280 | 10.5 SYSTEMATIC TRUS GUIDED BIOPSY .....                                             | 402       |
| 12281 | 10.6 PATHOLOGY .....                                                                 | 40        |
| 12282 | 10.7 POST-PROCEDURAL CARE .....                                                      | 40        |
| 12283 | 10.8 IMMEDIATE POST-BIOPSY QUESTIONNAIRE .....                                       | 40        |
| 12284 | 10.9 30-DAY POST-BIOPSY QUESTIONNAIRE.....                                           | 41        |
| 12285 | 10.10 RESULTS AND TREATMENT DECISION (VISIT 4).....                                  | 41        |
| 12286 | 10.11 FOLLOW UP PERIOD.....                                                          | 42        |
| 12287 | 10.12 ADDITIONAL TESTS FOR BIOMARKER DISCOVERY - OPTIONAL .....                      | 43        |
| 12288 | 10.12.1 Samples to be collected for future biomarker discovery work (Optional) ..... | 43        |
| 12289 | 10.13 LONG-TERM DATA LINKAGE – PERMISSION TO CONTACT .....                           | 43        |
| 12290 | 10.14 END OF STUDY .....                                                             | 44        |
| 12291 | 10.15 RISKS AND BENEFITS TO PARTICIPANTS .....                                       | 44        |
| 12292 | 10.15.1 Risks to subjects.....                                                       | 44        |
| 12293 | 10.15.2 Benefits to subjects.....                                                    | 46        |
| 12294 | 10.16 CONCOMITANT MEDICATIONS .....                                                  | 46        |
| 12295 | 10.16.1 Permitted Medications .....                                                  | 46        |
| 12296 | 10.16.2 Non-Drug Therapies.....                                                      | 46        |
| 12297 | <b>11. SCHEDULE OF STUDY VISITS .....</b>                                            | <b>47</b> |
| 12298 | 11.1 VISIT 1 (SCREENING/RANDOMIZATION): SCREENING, CONSENT, RANDOMIZATION.....       | 47        |
| 12299 | 11.2 VISIT 2 (MRI): ARM A, FOR MEN RANDOMIZED TO MRI .....                           | 47        |
| 12300 | 11.3 VISIT 3 (BIOPSY): ARM A, MRI-TARGETED BIOPSY OF PROSTATE .....                  | 47        |
| 12301 | 11.4 VISIT 3 (BIOPSY): ARM B, FOR MEN RANDOMIZED TO A SYSTEMATIC TRUS-BIOPSY .....   | 48        |
| 12302 | 11.5 VISIT 4 (POST-TEST FOLLOW UP): ARM A, FOR MEN WHO DID NOT RECEIVE A BIOPSY..... | 49        |
| 12303 | 11.6 VISIT 4 (POST-TEST FOLLOW UP): FOR ALL MEN WHO RECEIVED A BIOPSY .....          | 49        |
| 12304 | 11.7 VISIT 5 ( 6 MONTH FOLLOW UP):.....                                              | 40        |
| 12305 | 11.8 VISIT 6 (1 YEAR FOLLOW UP): 52 WEEK FOLLOW UP .....                             | 49        |
| 12306 | 11.9 VISIT 7 (18 MONTH FOLLOW UP):.....                                              | 41        |
| 12307 | 11.8 VISIT 8 (2 YEAR FOLLOW UP): END OF STUDY.....                                   | 50        |
| 12308 | <b>12. RANDOMIZATION .....</b>                                                       | <b>50</b> |
| 12309 | 12.1 REGISTRATION AND RANDOMIZATION PROCEDURE.....                                   | 50        |
| 12310 | 12.2 STRATIFICATION.....                                                             | 51        |
| 12311 | 12.3 BLINDING AND MEASURES TAKEN TO AVOID BIAS .....                                 | 51        |
| 12312 | <b>13. DATA.....</b>                                                                 | <b>51</b> |
| 12313 | <b>14. STATISTICAL CONSIDERATIONS .....</b>                                          | <b>52</b> |
| 12314 | 14.1 SAMPLE SIZE CALCULATION .....                                                   | 52        |
| 12315 | 14.2 INTERIM ANALYSIS .....                                                          | 46        |
| 12316 | 14.3 POPULATIONS: .....                                                              | 55        |
| 12317 | 14.4 PRIMARY OUTCOME.....                                                            | 55        |
| 12318 | 14.5 SECONDARY OUTCOMES .....                                                        | 55        |
| 12319 | <b>15. PARTICIPANT COMPLIANCE AND WITHDRAWAL .....</b>                               | <b>59</b> |
| 12320 | 15.1 SUBJECT WITHDRAWAL FROM STUDY.....                                              | 59        |
| 12321 | 15.2 STUDY COMPLETION .....                                                          | 60        |
| 12322 | <b>16. DATA MONITORING, QUALITY CONTROL AND SAFETY.....</b>                          | <b>60</b> |
| 12323 | 16.1 STOPPING / DISCONTINUATION RULES .....                                          | 60        |
| 12324 | 16.2 MONITORING, QUALITY CONTROL AND ASSURANCE .....                                 | 61        |
| 12325 | 16.3 ASSESSMENT OF SAFETY .....                                                      | 61        |
| 12326 | 16.3.1 Definition of an Adverse Event (AE) .....                                     | 61        |
| 12327 | 16.3.2 Definition of a Serious Adverse Event (SAE).....                              | 61        |
| 12328 | 16.3.3 Disease-Related Events or Outcomes Not Qualifying as SAEs.....                | 62        |

|       |                                                                                           |           |
|-------|-------------------------------------------------------------------------------------------|-----------|
| 12329 | <i>16.3.4 Lack of Efficacy</i> .....                                                      | 62        |
| 12330 | <i>16.3.5 Clinical Laboratory Abnormalities and Other Abnormal Assessments as AEs and</i> |           |
| 12331 | <i>SAEs</i> .....                                                                         | 62        |
| 12332 | <i>16.3.6 Recording/Reporting AEs and SAEs</i> .....                                      | 63        |
| 12333 | <i>16.3.7 Evaluating AEs and SAEs</i> .....                                               | 64        |
| 12334 | <i>16.3.8 Follow-up of AEs and SAEs</i> .....                                             | 65        |
| 12335 | <i>16.3.9 Prompt Reporting of SAEs</i> .....                                              | 65        |
| 12336 | <i>16.3.10 Post-study AEs and SAEs</i> .....                                              | 66        |
| 12337 | <b>17. STUDY ADMINISTRATION</b> .....                                                     | <b>66</b> |
| 12338 | 17.1 REGULATORY AND ETHICAL CONSIDERATIONS .....                                          | 66        |
| 12339 | 17.1.1 <i>Ethical Conduct of the Study and Ethics Approval</i> .....                      | 66        |
| 12340 | 17.1.2 <i>Informed Consent</i> .....                                                      | 67        |
| 12341 | 17.1.3 <i>Investigator Reporting Requirements</i> .....                                   | 67        |
| 12342 | 17.2 STUDY MONITORING .....                                                               | 67        |
| 12343 | 17.3 QUALITY ASSURANCE.....                                                               | 68        |
| 12344 | 17.4 STUDY AND SITE CLOSURE .....                                                         | 68        |
| 12345 | 17.5 RECORDS RETENTION .....                                                              | 69        |
| 12346 | 17.6 DATA MANAGEMENT .....                                                                | 69        |
| 12347 | 17.7 PUBLICATION .....                                                                    | 69        |
| 12348 | <b>18. REFERENCES</b> .....                                                               | <b>71</b> |
| 12349 | <b>APPENDICES</b> .....                                                                   | <b>76</b> |
| 12350 | APPENDIX 1: TIME WINDOWS FOR DATA COLLECTION .....                                        | 76        |
| 12351 | APPENDIX 2: MPMRI REPORTING PROFORMA .....                                                | 81        |
| 12352 | APPENDIX 3: EXAMPLE OF SYSTEMATIC TRUS GUIDED BIOPSYSCHEMA.....                           | 83        |
| 12353 | APPENDIX 4: 2-PAGE EQ-5D-5L QUESTIONNAIRE .....                                           | 84        |
| 12354 | APPENDIX 5: IMMEDIATE POST BIOPSY QUESTIONNAIRE.....                                      | 83        |
| 12355 | APPENDIX 6: 30-DAY POST BIOPSY QUESTIONNAIRE.....                                         | 86        |
| 12356 |                                                                                           |           |
| 12357 |                                                                                           |           |
| 12358 |                                                                                           |           |
| 12359 |                                                                                           |           |



---

12360 **4. Abbreviations and definitions**

12361 **Abbreviations:**

|       |          |                                                     |
|-------|----------|-----------------------------------------------------|
| 12362 |          |                                                     |
| 12363 | ADC      | Apparent diffusion coefficient                      |
| 12364 | CI       | Confidence interval                                 |
| 12365 | CRF      | Case report form                                    |
| 12366 | DSMC     | Data Safety and Monitoring Committee                |
| 12367 | DRE      | Digital rectal examination                          |
| 12368 | DWI      | Diffusion weighted imaging                          |
| 12369 | DCE      | Dynamic contrast enhancement                        |
| 12370 | EDC      | Electronic Data Capture                             |
| 12371 | ITT      | Intention to treat                                  |
| 12372 | MCCL     | Maximum cancer core length                          |
| 12373 | MPMRI    | Multi-parametric MRI, used interchangeably with MRI |
| 12374 |          | in this protocol.                                   |
| 12375 | MPMRI-TB | Multi-parametric magnetic resonance image-targeted  |
| 12376 |          | biopsy of the prostate                              |
| 12377 | MRI      | Magnetic resonance imaging, used interchangeably    |
| 12378 |          | with MPMRI in this protocol                         |
| 12379 | MRI-TB   | Magnetic resonance imaging targeted biopsy          |
| 12380 | MRS      | Magnetic resonance spectroscopy                     |
| 12381 | PI       | Principal Investigator                              |
| 12382 | PI-RADS  | Prostate Imaging Reporting and Data System          |
| 12383 | PTC      | Permission to Contact                               |
| 12384 | PSA      | Prostate specific antigen                           |
| 12385 | REB      | Research Ethics Board                               |
| 12386 | STARD    | Standards for the reporting of diagnostic studies   |
| 12387 | TRUS     | Trans-rectal ultrasound                             |
| 12388 | TSC      | Trial Steering Committee                            |
| 12389 | T2W      | T2-weighted imaging                                 |

12390

12391

12392 **Definitions:**

12393

|       |                       |                                                |
|-------|-----------------------|------------------------------------------------|
| 12394 | MPMRI-targeted biopsy | A biopsy technique where an MPMRI scan is      |
| 12395 |                       | used to determine the location of a suspicious |
| 12396 |                       | target prior to biopsy.                        |

12397

|       |                               |                                               |
|-------|-------------------------------|-----------------------------------------------|
| 12398 | Systematic TRUS guided biopsy | A biopsy approach where conduct of procedure  |
| 12399 |                               | is not influenced by findings on MRI imaging. |
| 12400 |                               | Currently this is the standard of care for    |
| 12401 |                               | prostate cancer in the province of Ontario.   |

12402

12403

12404

12405  
12406

---

## 5. Trial summary

### 5.1 Aim and Rationale

12408

12409 The standard pathway for prostate cancer diagnosis is trans-rectal ultrasound guided  
12410 (TRUS) biopsy of the prostate following an elevated PSA. TRUS guidance is  
12411 performed primarily for anatomic guidance as the ultrasound poorly discriminates  
12412 between cancerous and non-cancerous tissue. TRUS guided prostate biopsies are  
12413 concentrated in areas of the peripheral zone, thought to harbor the majority of  
12414 cancer.

12415

12416 An alternative pathway for prostate cancer diagnosis in men with elevated PSA is to  
12417 perform multi-parametric magnetic resonance imaging (MPMRI) to localize cancer.  
12418 This information is used to direct a subsequent biopsy, known as an MRI-targeted  
12419 biopsy. MRI-targeted biopsy has been shown in preliminary studies to detect a  
12420 similar or greater amount of clinically significant cancer than systematic TRUS guided  
12421 biopsy and has several other potential advantages including: the ability to  
12422 differentiate between clinically significant and insignificant cancer, reducing  
12423 unnecessary biopsy and fewer numbers of biopsy cores, reducing biopsy-related  
12424 side-effects.

12425

12426 A 'clinically insignificant cancer' is cancer that is unlikely to progress or to affect an  
12427 individual's life expectancy and therefore does not warrant treatment. However  
12428 when diagnosed with low grade cancer that is likely to be insignificant, a large  
12429 proportion of subjects request treatment in case a more significant cancer is  
12430 present[1]. A challenge in this area is that subjects are typically not aware that their  
12431 cancer is clinically insignificant, and often view the early diagnosis and aggressive  
12432 treatment they have been subjected to as life-saving.

12433 A prostate cancer detection procedure that differentiates clinically significant cancer  
12434 from clinically insignificant cancer is therefore a major unmet need.

12435

12436 The potential implications of this trial include:

12437

12438

12439

12440

12441

12442

12443

12444

12445

12446

12447

- A redefinition of the prostate cancer diagnostic pathway;
- A reduction in the number of subjects undergoing prostate biopsy;
- A reduction in the number of biopsy cores taken per subject;
- A reduction in biopsy-related adverse events including sepsis and pain;
- A reduction in the over-diagnosis of clinically insignificant prostate cancer;
- A reduction in the economic burden of diagnosing and treating prostate cancer.

12448  
12449  
12450  
12451  
12452  
12453  
12454  
12455  
12456  
12457  
12458  
12459  
12460  
12461  
12462  
12463  
12464  
12465  
12466  
12467  
12468  
12469  
12470  
12471  
12472  
12473  
12474  
12475  
12476  
12477  
12478  
12479  
12480  
12481  
12482  
12483  
12484  
12485  
12486  
12487  
12488  
12489  
12490  
12491  
12492

---

## 5.2 Methods

Men referred with clinical suspicion of prostate cancer who have had no prior biopsy are randomized to either systematic TRUS guided biopsy(standard of care) or to a multi-parametric MRI (MPMRI) arm (the investigational arm). In the MRI arm, areas of the prostate are scored on a 5-point scale of suspicion for clinically significant cancer based on the Prostate Imaging Reporting and Data System

(PI-RADS) v2[2]:

PI-RADS 1 – Very low (clinically significant cancer is highly unlikely to be present)

PI-RADS 2 – Low (clinically significant cancer is unlikely to be present)

PI-RADS 3 – Intermediate (the presence of clinically significant cancer is equivocal)

PI-RADS 4 – High (clinically significant cancer is likely to be present)

PI-RADS 5 – Very high (clinically significant cancer is highly likely to be present)

Each suspicious area will be given a separate score as described by consensus meeting recommendations [2, 3]. Lesions scoring 3, 4 or 5 will undergo targeted biopsy; up to three suspicious areas will be targeted.

In the control arm, subjects will undergo a standard 12 core systematic TRUS guided biopsy as per standard recommendations[4]. Suspicious sonographic lesions will be targeted (12 cores *in toto*).

Pathologic findings from all biopsies will be recorded and will undergo statistical analysis (see statistics section, 14.0).

In both arms, self-reported questionnaires to capture biopsy-specific side effects will be administered immediately post-procedure, and at the post-procedure appointment which will take place 3 weeks ( $\pm$  1 week) after the procedure. Euro QOL group 5 domain EQ-5D-5L questionnaires or a comparable QOL instrument will also be completed at baseline (prior to MRI or TRUS biopsy), 24 hours post MRI and 24 hours post-biopsy. Men will be followed up for 30-days post intervention and until a treatment decision is made and recorded. Pathology results from men requiring a radical prostatectomy will be recorded.

Men will complete the trial after they complete treatment for prostate cancer (radical prostatectomy) or the required follow-up procedures for each arm are met (see study timelines, section 9.3). Once men complete the trial, they revert to standard of care.

Annual questionnaires will be administered for all men with negative biopsy in both arms during a two-year follow-up period to determine cancer and treatment status.

---

12493 No diagnostic test is perfect, and even with the best test some cancers may be  
12494 missed. To minimize the risk of false negatives, men with negative biopsy results will  
12495 be followed with serial PSA testing; PSA levels will increase if cancer is present.  
12496 In both arms in addition to serial PSA testing all men who have no cancer found at  
12497 systematic biopsy or targeted biopsy, have a negative MRI or enter active  
12498 surveillance will have a followup MRI at 24 months. If a new Pi-Rads  $\geq 3$  lesion is  
12499 found on the followup MRI or there is progression of an existing lesion this lesion will  
12500 undergo targeted biopsy as part of standard of care.

12501  
12502 As recruitment is expected to take up to 24 months (see section 7.6) and each  
12503 subject will be followed up for two years, the estimated maximal duration of this  
12504 study is four years in total. The primary endpoint will be reached at approximately 2  
12505 years after study initiation.

### 12506 **5.3 Participating Sites**

12507 This is a multi-centre study. Institutions participating in the study must be able to  
12508 perform both the systematic TRUS guided biopsy and the MRI-TB. They must be able  
12509 to randomize men to one of these two diagnostic tests.

12510  
12511 We expect to recruit 3-6 subjects per month per site, based on recruitment rates  
12512 from previous diagnostic trials performed by the centers involved. A typical centre  
12513 sees 15-30 eligible men per month. We expect 5 recruitment sites, with 100 men to  
12514 be recruited at each site over an 18-24 month period (see section 7.6).

### 12515 **5.4 Study outcomes**

#### 12516 **5.4.1 Primary outcome**

12517 To determine whether the proportion of men with clinically significant cancer  
12518 (Gleason  $\geq 7$ ) detected by MRI-targeted biopsy is no less than systematic TRUS  
12519 guided biopsy.

#### 12520 **5.4.2 Secondary outcomes**

- 12521 53. To determine whether the proportion of men with clinically significant cancer  
12522 (Gleason  $\geq 7$ ) detected by MRI-targeted biopsy is greater than systematic TRUS  
12523 guided biopsy.
- 12524 54. Proportion of men in each arm with clinically insignificant cancer detected.
- 12525 55. Proportion of men in each arm with Gleason  $\geq 4+3$  detected.
- 12526 56. Proportion of men in MRI arm who avoid biopsy.
- 12527 57. Proportion of men in the MRI arm whom the PI-RADS score for suspicion of  
12528 clinically significant cancer was 3, 4 or 5 but no clinically significant cancer was  
12529 detected.
- 12530 58. Proportion of men in each arm who go on to definitive local treatment (e.g.  
12531 radical prostatectomy, radiotherapy, brachytherapy) or systemic treatment (e.g.  
12532 hormone therapy, chemotherapy).
- 12533 59. Proportion of men in each arm who do not have significant cancer found at  
12534 baseline who develop a positive MRI and/or have a progressive lesion found on  
12535 MRI and/or have Gleason  $\geq 7$  cancer detected on a repeat biopsy (systematic or

- 
- 12536 targeted) by 2 years.
- 12537 60. Proportion of men with post-biopsy adverse events
- 12538 61. Health-related quality of life scores.
- 12539 62. Proportion with Gleason grade upgrading in men undergoing radical
- 12540 prostatectomy.
- 12541 63. To determine the cost per diagnosis of cancer.
- 12542 64. To determine the impact of the addition of Gd based contrast compared to a non
- 12543 contrast abbreviated MRI protocol on target yield
- 12544 65. To determine if a radiologist Likert score not based on PI-RADS has a better
- 12545 target yield than PI-RADS alone
- 12546
- 12547

## 12548 **6. Background**

### 12549 **6.1 Prostate cancer diagnosis**

12550 Prostate cancer is the most common male cancer in the Western world with an

12551 incidence of 24,000 new cases in Canada and 233,000 in the USA[5, 6]. It is the

12552 second most common cause of cancer death in European and North American men,

12553 with 2,900 deaths per year in Canada and 90,000 deaths per year in Europe[5, 6].

12554 The incidence of the disease has increased by 22% over the last decade due to the

12555 widespread use of the prostate specific antigen (PSA) blood test; by 2030 the

12556 Canadian Cancer Society estimates the incidence of prostate cancer will be 42,225.As

12557 prostate cancer is a histopathological diagnosis, men with raised PSA or abnormal

12558 digital rectal examination (DRE) are usually referred for a prostate biopsy. Over one

12559 million prostate biopsies are performed in North America and Europe every year[7].

12560

### 12561 **6.2 Clinically significant versus clinically insignificant prostate cancer**

12562

12563 Clinically significant prostate cancer is cancer that is likely to progress and affect a

12564 man's life expectancy if left untreated. Though there is no universally agreed upon

12565 definition on what histological parameters define clinically significant cancer, most

12566 agree that larger volume cancers with a higher Gleason grade are more likely to be

12567 clinically significant; an historically accepted threshold is a tumour volume above

12568 0.5milliliters or any Gleason pattern 4 or 5 cancer[8-11].

12569

12570 This definition is likely overly stringent. An increasing consensus views all Gleason

12571 pattern 3 (Gleason score 6) cancers and many Gleason3 plus small amounts of

12572 pattern 4 cancers as likely insignificant[12]. About half of newly diagnosed prostate

12573 cancers fall into this category, and are unlikely to progress and affect a man's life

12574 expectancy if left untreated. The widespread use of PSA testing has led to more men

12575 being diagnosed with insignificant cancer that does not warrant any treatment [13];

12576 however they are typically monitored closely with active surveillance. This is

12577 associated with anxiety about harbouring untreated cancer, and the negative

12578 psychological effects of being a 'survivor' [14]. Men diagnosed with low risk prostate

12579 cancer are also subjected to serial biopsies and other tests, requiring long term

12580 follow up. Further, many men with low risk disease receive radical treatment, either

---

12581 because their physicians are not advocates of surveillance or because of anxiety  
12582 [15].These treatments may expose them to morbidity including urinary incontinence  
12583 and erectile dysfunction [16]. Thus, diagnostic tests that clearly differentiate  
12584 clinically significant cancer from clinically insignificant cancer will help reduce patient  
12585 anxiety, alleviate further testing, and avoid radical treatment and associated  
12586 morbidities.  
12587

### 12588 **6.3 Current standard of care: systematic TRUS guided biopsy**

12589 The European association of Urology and NICE guidelines recommend systematic  
12590 TRUS guided biopsy as the current standard of care for the diagnosis of prostate  
12591 cancer [4, 17].This procedure has several advantages: it can be delivered quickly in  
12592 an outpatient clinic under local anesthetic, it can be offered at most Urology centres,  
12593 and the expertise is widely distributed.  
12594

12595 Limitations of systematic TRUS guided biopsy are as follows: the procedure requires  
12596 the operator to take 10-12 samples in the peripheral zone, where it is thought that  
12597 the majority of prostate cancer can be found (See Appendix 2)[18]. The ultrasound  
12598 guidance used during the procedure is useful for visualizing the prostate and  
12599 assessing the location of the needle within the prostate but has a poor ability to  
12600 discriminate tumour from normal tissue [19], which means that the systematic TRUS  
12601 guided biopsy can potentially miss some cancer. Systematic TRUS guided biopsy has  
12602 been shown to have a high false negative rate of 30-45% [20, 21].As a systematic  
12603 TRUS guided biopsy is not specifically targeted to the location of a suspected  
12604 significant cancer, there is also a greater chance that a significant cancer may be  
12605 missed.

### 12606 **6.4 The emerging role of MRI in prostate cancer diagnosis and** 12607 **treatment**

#### 12608 **6.4.1 The role of imaging in prostate cancer diagnosis**

12609 Although used to diagnose many other solid organ cancers such as breast, renal and  
12610 colorectal cancer, imaging is not part of the traditional prostate cancer diagnostic  
12611 pathway. Imaging in prostate cancer, is typically limited to stage the disease  
12612 following histological diagnosis. Magnetic resonance imaging (MRI) is used in many  
12613 centres to assess for extra-capsular extension during prostate cancer staging. In the  
12614 past five years however, the possibility of using multi-parametric MRI (MPMRI)for  
12615 diagnosing prostate cancer prior to biopsy, has generated tremendous interest[22].

#### 12616 **6.4.2 Limitations of early MRI studies in prostate cancer**

12617 Early literature reported conflicting results on the ability of MRI to detect prostate  
12618 cancer. A recent systematic review of the literature showed that the quality of  
12619 studies evaluating MRI was disappointing [22]. Limitations of reported studies  
12620 include:

- 12621 • **Poor reporting standards.** Many early studies failed to closely follow  
12622 published guidelines for the standards of reporting of diagnostic studies  
12623 (STARD) [23].

- 
- 12624
- 12625
- 12626
- 12627
- 12628
- 12629
- 12630
- 12631
- 12632
- 12633
- 12634
- 12635
- 12636
- 12637
- 12638
- 12639
- 12640
- 12641
- 12642
- **Biopsy artifact.** The majority of early studies evaluated MRI after biopsy. Evidence has shown that post-biopsy hemorrhage can remain for several months and affect interpretation of the image [24].
  - **Poor reference standards.** Many early studies use systematic TRUS guided biopsy as a reference standard, which due to its limitations, can influence the validity of the index test of MRI. Using radical prostatectomy specimens as reference standards can lead to a selection bias, as MRI is only validated in men with disease characteristics that require radical prostatectomy. Further, correlation of radical prostatectomy specimen with an MRI image is not without difficulty given the shrinkage (10-20%), distortion, absent perfusion, orientation and tissue loss as a result of specimen trimming.
  - **Incomplete analysis of the prostate.** Many early studies only evaluate the validity of MRI in the peripheral zone, even though studies have shown that around 25% of prostate cancers may be located in the transition zone [18].
  - **Segmentation.** Many early studies artificially divide the prostate into a number of segments in order to increase the amount of data obtained and the power of the analysis. Segments should not be treated as independent regions of interest, and this should be factored into the analysis.

#### 12643 **6.4.3 Emerging role of MRI in the diagnosis of prostate cancer**

12644 Since the publication of these early reports, improvements in diagnostic technology  
12645 have changed the field and more evidence supporting the role of pre-biopsy MRI has  
12646 been published. Magnetic field strength has increased from 0.5 Tesla to 1.5 Tesla  
12647 and 3.0 Tesla. The introduction of shorter pulse sequences allows faster image  
12648 acquisition and the addition of functional sequences including magnetic resonance  
12649 spectroscopy (MRS), diffusion weighted imaging (DWI) and dynamic contrast  
12650 enhanced imaging (DCE). Clinicians are increasingly aware of and are accounting for  
12651 biopsy artifacts.

12652

12653 The combination of anatomical sequences (T2-weighted imaging) and functional  
12654 sequences (MRS and/or DWI and/or DCE) is termed multi-parametric MRI.  
12655 Combining the sequences improves the validity of the test [25, 26].

12656

12657 A systematic review determined that 60% of men with a clinical suspicion of prostate  
12658 cancer will have a suspicious area identified on MRI [27]. In studies correlating MRI  
12659 with radical prostatectomy specimens, MRI demonstrates sensitivity, specificity,  
12660 positive predictive value and negative predictive value of 90%, 88%, 77% and 95%  
12661 respectively for the identification of prostate tumours greater than 0.5ml [28].

12662 Systematic reviews and meta-analysis of recent studies have demonstrated  
12663 sensitivity and specificity consistently between 70-90% for the detection of clinically  
12664 significant prostate cancer[26, 29-31].

12665

12666 As a result of this accumulating evidence, MRI is increasingly used in clinical practice  
12667 in the diagnostic pathway for prostate cancer. The results of MRI can influence the  
12668 decision to perform a prostate biopsy, as well as the technique and targeting used  
12669 during the biopsy.

---

12670

12671 MRI has tremendous potential to enhance the outcome of men on active  
12672 surveillance. 30% of men diagnosed with low risk prostate cancer (Gleason 6, PSA <  
12673 10) harbor higher-grade disease. This occult high-grade disease “*the wolf in sheep’s*  
12674 *clothing*”, is responsible for the 3-5% of prostate cancer deaths that have been  
12675 reported in long term surveillance series that did not incorporate MRI[32, 33]. The  
12676 early use of MRI in men on surveillance has the potential both to reduce the need  
12677 for confirmatory biopsies, and to identify the *wolf in sheep’s clothing* earlier, prior to  
12678 the development of metastasis.

12679

12680 This was the rationale for the very successful ASIST study, which recently successfully  
12681 completed its accrual. The ASIST study was led by Dr. Klotz (PI), and sponsored *in*  
12682 *toto* by the Ontario Institute of Cancer Research. The project was managed by the  
12683 Canadian Urology Research Consortium (CURC). It randomized 273 men recently  
12684 diagnosed with low risk prostate cancer, on surveillance, between systematic  
12685 confirmatory biopsy and MRI with targeted and systematic biopsy. The primary end  
12686 point, similar to PRECISE, was the proportion of men in each group with Gleason 7 or  
12687 higher prostate cancer. The study had numerous secondary end points and  
12688 correlative science components. We expect to report the initial results by 3Q  
12689 2016. We believe that the success and potential impact of the ASIST trial has created  
12690 strong momentum to proceed with the PRECISE trial, which has even greater  
12691 potential to substantially influence prostate cancer screening and diagnosis.

#### 12692 **6.4.3.1 MRI can influence the decision to perform a prostate biopsy**

12693 With reported negative predictive values of 95% [28, 34,35], MRI can help determine  
12694 whether a prostate biopsy is necessary; if the MRI does not identify a suspicious area  
12695 the biopsy can be avoided. Using MRI, 40-50% of men referred with clinical suspicion  
12696 of prostate cancer might avoid a biopsy [27]. The recent National Institute for Health  
12697 Research (NIHR) Health Technology Assessment (HTA) report [11] acknowledged the  
12698 value of MRI in this context. The NIHR HTA report suggests that using MRI to reduce  
12699 the number of men who undergo biopsy, can be cost effective despite the costs  
12700 associated with MRI[11]. Cost savings for the publically funded health care system  
12701 accrue as a result of reduced number of biopsies and costs of attendant  
12702 complications, and reduced treatment of clinically insignificant cancer.

#### 12703 **6.4.3.2 MRI can influence the biopsy technique**

12704 For men who receive a MRI scan and then go on to biopsy of the prostate, the MRI  
12705 information is used to influence the prostate biopsy technique. This is known as MRI-  
12706 targeted biopsy (MRI-TB) of the prostate, and can be carried out in a number of  
12707 ways.

12708

12709 The biopsy operator can use the MRI images or report to direct biopsies into the  
12710 area of the prostate where the tumour is located. The location of the tumour on the  
12711 MRI (carried out in advance) is registered to the real-time ultrasound images with  
12712 the use of software (software assisted registration or image-fusion) or without the  
12713 use of software (visual registration or cognitive registration), while the prostate is  
12714 visualized in real-time using trans rectal ultrasound. MRI-TB can also be conducted  
12715 directly “in-bore”, where the biopsy is conducted within an MRI scanner where the



---

12716 target identified on MRI during a prior diagnostic scan is biopsied using guidance  
12717 from serial MRI scans during the biopsy procedure, performed in an open magnet.  
12718

12719 For the PRECISE study, the biopsy will be performed using an image fusion-targeting  
12720 device. Two devices have been FDA approved: the Artemis, made by Eigen, and the  
12721 Urostation, made by Koelis. These devices import the MR target into the TRUS  
12722 image, and direct the biopsy needle into the target.

#### 12723 **6.4.4 Prostate cancer detection rates of MRI-targeted biopsy are** 12724 **similar to other methods**

12725 A systematic review determined that 60% of men with a clinical suspicion of prostate  
12726 cancer will have a suspicious area identified on MRI [27]. One study found that a  
12727 prostate biopsy strategy using only MPMRI-targeted cores resulted in the same  
12728 detection rate of clinically significant cancer as 20-sector transperineal biopsies[36].  
12729 Other studies also show that a targeted-alone approach would detect a similar  
12730 amount of clinically significant cancer when compared to a 10-12 core systematic  
12731 TRUS guided biopsy[37]. A targeted-alone approach detects 17% less clinically  
12732 insignificant cancer compared to systematic TRUS guided biopsy[38].  
12733

12734 The detection rates achieved with a targeted-alone biopsy strategy require fewer  
12735 biopsy cores than systematic TRUS guided biopsy. Thus on a per-core analysis,  
12736 targeted biopsy is more efficient than systematic TRUS guided biopsy, with cancer  
12737 detected in 30% of all targeted cores in a pooled analysis of 1252 targeted cores  
12738 compared to 7% of all systematic TRUS guided biopsy cores in a pooled analysis of  
12739 5441 systematic cores [27]. As well, the MRI targeted biopsy provides more material  
12740 for histopathological analysis as the maximum cancer core length obtained from  
12741 targeted biopsies can be greater than that obtained from systematic biopsies[37].  
12742

12743 Robust comparative evidence from randomized controlled trials is needed to  
12744 determine if MRI scans can improve our ability over systematic TRUS guided biopsy  
12745 to diagnose clinically significant cancer and our ability to avoid detecting clinically  
12746 insignificant cancer.  
12747

#### 12748 **6.4.5 Limitations of studies reporting MPMRI-targeted prostate biopsy**

12749 Despite encouraging results of MRI-targeted biopsy, it is not yet part of routine  
12750 clinical practice for prostate cancer diagnosis. Most existing studies have cohort  
12751 study designs which make interpretation difficult as they do not conform well to  
12752 STARD [23] recommendations [27]. Limitations of these studies include:

- 12753 • **Broad definition of the study population.** The cancer detection rates depend on  
12754 the prevalence of the condition in the population being investigated. This varies  
12755 amongst men with no prior biopsy, prior negative biopsy and prior positive  
12756 biopsy. In many studies the detection rates are not attributable to a clearly  
12757 defined population.
- 12758 • **MRI conduct and reporting.** The detail in which MRI is conducted and  
12759 interpreted varies greatly amongst published studies.

---

12760 • **Reporting of cancer detection.** The cancer detection by systematic and targeted  
12761 cores is not always presented separately and cancer detection is not always  
12762 specified by clinical significance. These are both essential in order to evaluate the  
12763 technique.  
12764 There is a strong need for a randomized controlled trial comparing MRI-targeted  
12765 biopsy to systematic TRUS guided biopsy so that the role of this technique in clinical  
12766 practice can be established.

## 12767 **6.5 Novelty of PRECISE**

12768 PRECISE is the first randomized study in biopsy-naïve men in which men are  
12769 randomized to an MRI targeted-alone biopsy arm (i.e. no biopsies of MR-normal  
12770 areas of prostate and no biopsy at all if the MR is non-suspicious) or a systematic  
12771 TRUS guided biopsy arm. This will allow evaluation of the efficacy of the MRI-  
12772 targeted biopsy approach in the detection of clinically significant cancer. In order to  
12773 evaluate a biopsy technique that could replace standard of care, the standard of care  
12774 test, i.e. systematic TRUS guided biopsy, must be included in one of the arms to  
12775 allow a direct comparison.

12776  
12777 Other constituencies with an interest in MRI in prostate cancer (University College,  
12778 London; Lille, France; Oslo, Norway; Heidelberg, Germany; New York University, New  
12779 York) have considered similar studies, however in these centres MRI has largely  
12780 replaced systematic TRUS guided biopsy, notwithstanding the lack of evidence to  
12781 date. As a result, these centres have acknowledged that randomization to a standard  
12782 biopsy arm (ie systematic TRUS guided biopsy) would no longer be feasible as  
12783 equipoise has been lost.

12784  
12785 In Ontario, and in almost all other Canadian provinces, prostate MPMRI is not  
12786 recommended for the indication of an elevated PSA in men who have not had a  
12787 biopsy. In this country, men at risk for prostate cancer, in almost all cases, proceed  
12788 to a TRUS guided systematic biopsy. We believe that the opportunity to avoid a  
12789 biopsy will make entry into this trial very appealing to potential candidates. Further,  
12790 the barriers, both financial and physical, to obtaining a quality MRI outside of the  
12791 health care system are substantial. Thus we believe men who are randomized to the  
12792 systemic biopsy arm will in almost all cases proceed with biopsy avoiding significant  
12793 contamination (i.e. men randomized to the systematic biopsy arm seeking out an  
12794 MRI instead).

12795

## 12796 **7. Trial objectives**

### 12797 **7.1 Overall aim**

12798 The aim of this study is to assess the efficacy of MRI-targeted biopsy compared to  
12799 standard of care systematic TRUS guided biopsy in the detection of clinically  
12800 significant and clinically insignificant prostate cancer in men without prior biopsy.  
12801 The implication of this trial is that MRI-targeted biopsy could replace systematic  
12802 TRUS guided biopsy as the standard of care in the diagnosis of prostate cancer.

---

12803 **7.2 Hypotheses**

12804 The proportion of men with clinically significant cancer detected by MRI-targeted  
12805 biopsy will be no less than that detected by systematic TRUS guided biopsy.

12806 **7.3 Primary Objective**

12807 To determine whether the proportion of men with clinically significant cancer  
12808 (Gleason  $\geq 7$ ) detected by MRI-targeted biopsy is no less than systematic TRUS  
12809 guided biopsy.

12810 **7.4 Secondary Objectives**

12811 66. To determine whether the proportion of men with clinically significant cancer  
12812 (Gleason  $\geq 7$ ) detected by MRI-targeted biopsy is greater than systematic TRUS  
12813 guided biopsy.

12814 67. Proportion of men in each arm with clinically insignificant cancer detected.

12815 68. Proportion of men in each arm with Gleason  $\geq 4+3$  detected.

12816 69. Proportion of men in MRI arm who avoid biopsy.

12817 70. Proportion of men in the MRI arm whom the PI-RADS score for suspicion of  
12818 clinically significant cancer was 3, 4 or 5 but no clinically significant cancer was  
12819 detected.

12820 71. Proportion of men in each arm who go on to definitive local treatment (e.g.  
12821 radical prostatectomy, radiotherapy, brachytherapy) or systemic treatment (e.g.  
12822 hormone therapy, chemotherapy).

12823 72. Proportion of men in each arm who do not have significant cancer found at  
12824 baseline who develop a positive MRI and/or have a progressive lesion found on  
12825 MRI and/or have Gleason  $\geq 7$  cancer detected on a repeat biopsy (systematic or  
12826 targeted) by 2 years.

12827 73. Proportion of men with post-biopsy adverse events

12828 74. Health-related quality of life scores.

12829 75. Proportion with Gleason grade upgrading in men undergoing radical  
12830 prostatectomy.

12831 76. To determine the cost per diagnosis of cancer.

12832 77. To determine the impact of the addition of Gd based contrast compared to a non  
12833 contrast abbreviated MRI protocol on target yield

12834 78. To determine if a radiologist Likert score not based on Pi-Rads has a better target  
12835 yield than Pi\_Rads alone

12836

12837

12838 **7.5 Explanation for non-inferiority hypothesis**

12839 Due to the putative advantages of MRI-TB in reducing the number of men who  
12840 require a biopsy, reducing the number of cores required in each man who is  
12841 biopsied, more accurate representation of disease burden, less insignificant disease  
12842 detected and reducing the number of men at risk of complications of biopsy, the  
12843 primary outcome of detection of clinically significant cancer in each arm will be  
12844 compared using a non-inferiority hypothesis. Even if a similar amount of clinically  
12845 significant cancer is identified by MRI-TB to systematic TRUS guided biopsy, these

12846 advantages would support the use of MRI-TB instead of systematic TRUS guided  
12847 biopsy in clinical practice.  
12848

## 12849 **7.6 Anticipated timeline of study progression**

12850 The study will commence once sponsorship, ethical approval and local approvals  
12851 have been obtained at a participating site and once site initiation training has  
12852 occurred and a letter of site activation has been issued from the coordinating centre.  
12853 Additional sites may join after the study has commenced. At this time, five sites will  
12854 participate. Assuming a minimum recruitment rate of 3-6 men per site per month,  
12855 recruitment will be complete by 24 months, if not sooner. If accrual is slower than  
12856 expected, an additional 1-2 sites will be recruited for year 2.  
12857

| Month | Number of Sites | Total recruitment |
|-------|-----------------|-------------------|
| 0     | 2               | 0                 |
| 3     | 4               | 18-36             |
| 6     | 5               | 54-108            |
| 9     | 5               | 99-198            |
| 12    | 5               | 144-288           |
| 15    | 5               | 189-378           |
| 18    | 5               | 234-468           |
| 21    | 5               | 279-558           |
| 24    | 5               | 324-648           |

12858

## 12859 **8. Study Population**

### 12860 **8.1 Number of Subjects**

12861 Approximately 450 men with a clinical suspicion of prostate cancer, based on PSA or  
12862 results of digital rectal exam, with no prior biopsy will be eligible for participation.  
12863 Subjects must satisfy all inclusion and exclusion criteria. A sufficient number will be  
12864 enrolled (estimate: 450) to achieve at least 211 completed subjects per arm.

### 12865 **8.2 Subject inclusion criteria**

12866 In order to be eligible, all inclusion criteria must be met:

- 12867 25. Men at least 18 years of age referred with clinical suspicion of prostate cancer  
12868 who have been advised to have a prostate biopsy;
- 12869 26.  $\geq 5\%$  chance of high-grade prostate cancer as calculated using individualized risk  
12870 assessment of prostate cancer calculator, PCPTRC 2.0, found at  
12871 <http://deb.uthscsa.edu/URORiskCalc/Pages/calcs.jsp> For men under age 55,  
12872 the default age of 55 should be entered on the risk calculator.
- 12873 27. Serum PSA  $\leq 20$ ng/ml within 3 months of randomization
- 12874 28. Fit to undergo all procedures listed in protocol;
- 12875 29. Able to provide written informed consent.

### 12876 **8.3 Subject exclusion criteria**

12877 Men who meet the following criteria at the time of screening will be excluded:

- 12878 25. Prior prostate biopsy

- 
- 12879 26. Prior treatment for prostate cancer  
12880 27. Contraindication to MRI (e.g. claustrophobia, pacemaker, estimated GFR  
12881 ≤50mls/min)  
12882 28. Contraindication to prostate biopsy  
12883 29. Men in whom artifact would reduce the quality of the MRI, i.e. previous hip  
12884 replacement surgery, metallic hip replacement or extensive pelvic orthopaedic  
12885 metal work  
12886 30. Unfit to undergo any procedures listed in protocol.

12887

## 12888 **9. Study design**

### 12889 **9.1 Study design**

12890 The study is a multi-centre, open-label randomized controlled trial, with men  
12891 randomized in a 1:1 ratio to one of two arms (see Trial Schema, section 9.2). Men in  
12892 Arm A will undergo a MRI followed by either a targeted biopsy of suspicious areas or  
12893 will be followed for two years if there is no suspicious areas identified by MRI. The  
12894 unbiopsied men will have a repeat MRI at 2 years. Men in Arm B will undergo a 12-  
12895 core systematic TRUS guided biopsy. All men in the study will be followed for two  
12896 years or until they have had radical treatment (whichever comes first).

12897

12898  
12899  
12900

## 9.2 Study Trial Schema

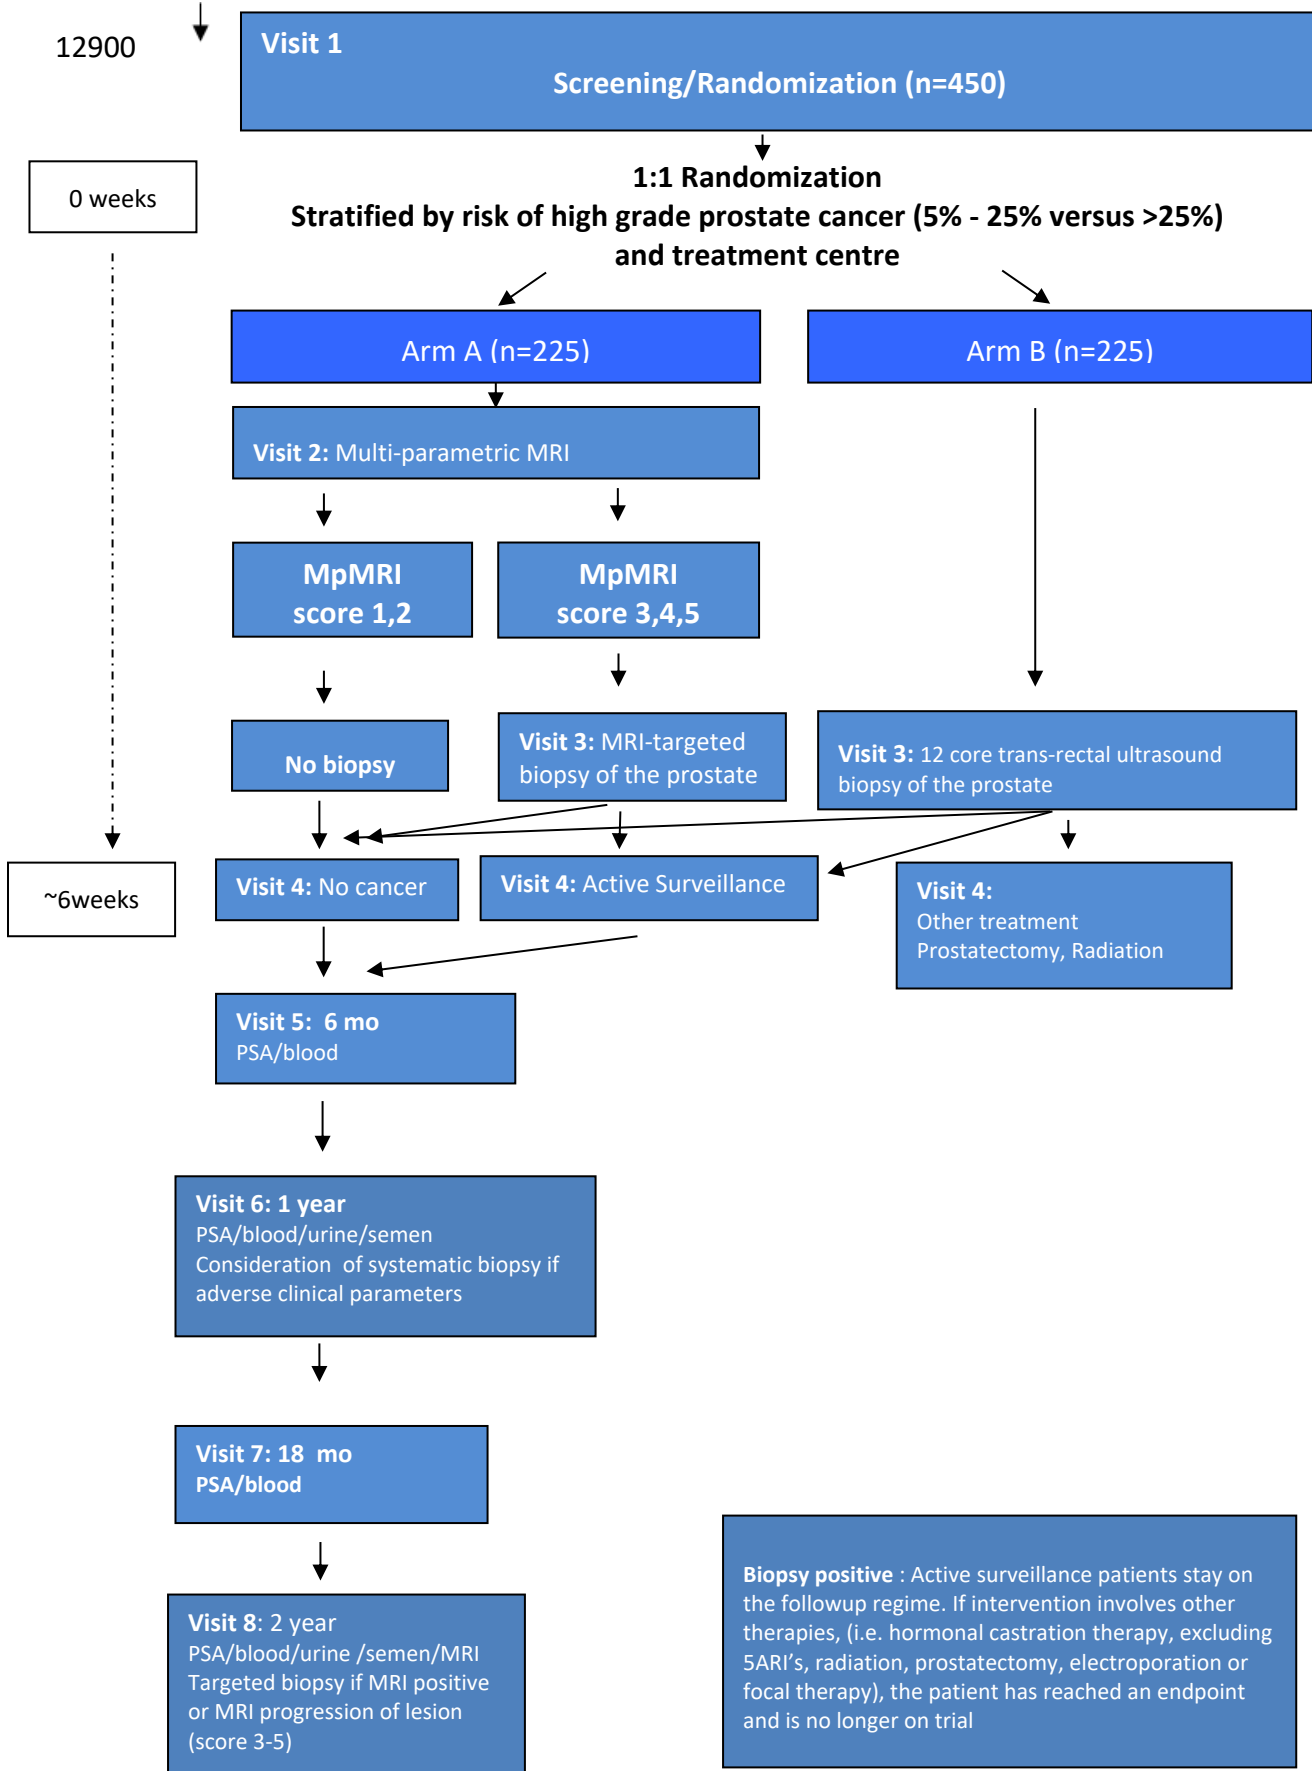

12901 **9.3 Timeline of subject contact**

12902 Tables 1, 2 and 3 illustrate the three individual subject pathways possible in the trial.

12903 The individual pathway that each subject experiences is dependent on both the arm he is randomized to and results of the tests.

12905

12906 **Table 1: ARM A: Men randomized to MRI arm who have a normal MRI and do not require**  
 12907 **a biopsy**

|                                        | Visit 1<br>Screening/<br>Randomization                  | Visit 2<br>MRI | Visit 3<br>N/A | Visit 4<br>Post-<br>Test | Visit 5<br>6 mos | Visit 6<br>1 year<br>follow<br>up | Visit<br>7<br>18<br>mos | Visit 8<br>2 year<br>follow<br>up | EOS/<br>withdrawal |
|----------------------------------------|---------------------------------------------------------|----------------|----------------|--------------------------|------------------|-----------------------------------|-------------------------|-----------------------------------|--------------------|
| <b>Weeks:</b>                          | 0                                                       | 1              | 2              | 5                        | 26               | 52                                | 78                      | 104                               |                    |
| Consent                                | X                                                       |                |                |                          |                  |                                   |                         |                                   |                    |
| Screening (eligibility review, med hx, | X                                                       |                |                |                          |                  |                                   |                         |                                   |                    |
| Vitals,                                | X                                                       |                |                |                          |                  | X                                 |                         | X                                 |                    |
| DRE <sup>1</sup>                       | X <sup>1</sup>                                          |                |                |                          |                  | X                                 |                         | X                                 |                    |
| Randomization                          | X                                                       |                |                |                          |                  |                                   |                         |                                   |                    |
| EQ-5D-5L                               | X                                                       |                |                | X                        |                  |                                   |                         | X                                 | X                  |
| Correlative sample collection:         |                                                         |                |                |                          |                  |                                   |                         |                                   |                    |
| • blood                                | X                                                       |                |                |                          | X                | X                                 | X                       | X                                 |                    |
| • urine <sup>2</sup>                   | X                                                       |                |                |                          |                  | X                                 |                         | X                                 |                    |
| • semen                                | X                                                       |                |                |                          |                  | X                                 |                         | X                                 |                    |
| • tissue-NA                            |                                                         |                |                |                          |                  |                                   |                         |                                   |                    |
| Creatinine <sup>4</sup>                | X <sup>4</sup>                                          |                |                |                          |                  |                                   |                         |                                   |                    |
| PSA <sup>5</sup>                       | X <sup>5</sup>                                          |                |                |                          | X                | X                                 | X                       | X                                 | X                  |
| Systematic TRUS guided biopsy          |                                                         |                |                |                          |                  |                                   |                         |                                   |                    |
| MRI                                    |                                                         | X              |                |                          |                  |                                   |                         | X <sup>6</sup>                    |                    |
| MRI-Targeted Biopsy                    |                                                         |                |                |                          |                  |                                   |                         | X if target                       |                    |
| Immediate post-biopsy questionnaire    |                                                         |                |                |                          |                  |                                   |                         |                                   |                    |
| Follow up for results of tests         |                                                         |                |                | X                        |                  |                                   |                         |                                   |                    |
| Treatment decision <sup>7</sup>        |                                                         |                |                | X                        |                  |                                   |                         |                                   |                    |
| 30-day post-biopsy questionnaire       |                                                         |                |                |                          |                  |                                   |                         |                                   |                    |
| AE/SAE                                 | Complete as required at any time following registration |                |                |                          |                  |                                   |                         |                                   |                    |
| Withdrawal Form                        | Complete as required at any time following registration |                |                |                          |                  |                                   |                         |                                   |                    |
| ConMeds Form                           | Complete as required at any time following registration |                |                |                          |                  |                                   |                         |                                   |                    |

12908

---

12909 <sup>1</sup>Urine sample will be required ONLY if the subject has agreed to the Correlative Science  
12910 collection, for PRE and POST DRE urine samples. See correlative manual for instruction.  
12911 <sup>2</sup>Urine samples will be collected at select visits, this may include 2 samples, 'Random-First  
12912 catch' and post-DRE samples. See the Correlative Science Manual for further details on  
12913 collection and processing.  
12914 <sup>3</sup>Collected at baseline, and annually.  
12915 <sup>4</sup>Creatinine requirements as per institutional Radiology (MRI) SOPs  
12916 <sup>5</sup>PSA greater than 3 months of randomization, must be repeated at screening .  
12917 <sup>6</sup> If MRI indicates a target, biopsy must be done  
12918 <sup>7</sup>After treatment decision men revert to standard of care.  
12919



12920  
12921

**Table 2: ARM A: Men randomized to MRI arm who have a lesion on MRI and require a biopsy**

|                                                 | Visit 1<br>Screening<br>/<br>Randomization                 | Visit 2<br>MRI | Visit 3<br>Biopsy | Visit 4<br>Post-<br>test | Visit 5<br>6 mos | Visit 6<br>1 year<br>follow<br>up | Visit 7<br>18<br>mos | Visit 8<br>2 year<br>follow<br>up | EOS<br>Intervention<br>/<br>withdrawal |
|-------------------------------------------------|------------------------------------------------------------|----------------|-------------------|--------------------------|------------------|-----------------------------------|----------------------|-----------------------------------|----------------------------------------|
| <b>Weeks:</b>                                   | 0                                                          | 1              | 2                 | 6                        | 26               | 52                                | 78                   | 104                               |                                        |
| Consent                                         | X                                                          |                |                   |                          |                  |                                   |                      |                                   |                                        |
| Screening<br>(eligibility<br>review, med hx)    | X                                                          |                |                   |                          |                  |                                   |                      |                                   |                                        |
| Vitals,                                         | X                                                          |                |                   |                          |                  | X                                 |                      | X                                 |                                        |
| DRE <sup>1</sup>                                | X <sup>1</sup>                                             |                |                   |                          |                  | X                                 |                      | X                                 |                                        |
| Randomization                                   | X                                                          |                |                   |                          |                  |                                   |                      |                                   |                                        |
| EQ-5D-5L                                        | X                                                          |                |                   | X                        |                  |                                   |                      | X                                 | X                                      |
| Correlative<br>sample<br>collection:<br>• blood | X                                                          |                |                   |                          | X                | X                                 | X                    | X                                 |                                        |
| • urine <sup>2</sup>                            | X                                                          |                |                   |                          |                  | X                                 |                      | X                                 |                                        |
| • semen                                         | X                                                          |                |                   |                          |                  | X                                 |                      | X                                 |                                        |
| • tissue <sup>4</sup>                           |                                                            |                | X                 |                          |                  |                                   |                      | X                                 |                                        |
| Creatinine <sup>5</sup>                         | X <sup>5</sup>                                             |                |                   |                          |                  |                                   |                      |                                   |                                        |
| PSA <sup>6</sup>                                | X <sup>6</sup>                                             |                |                   |                          | X                | X                                 | X                    | X                                 | X                                      |
| Systematic TRUS<br>guided biopsy                |                                                            |                |                   |                          |                  |                                   |                      |                                   |                                        |
| MRI <sup>7</sup>                                |                                                            | X              |                   |                          |                  |                                   |                      | X <sup>7</sup>                    |                                        |
| MRI-Targeted<br>Biopsy                          |                                                            |                | X                 |                          |                  |                                   |                      | X <sup>7</sup>                    |                                        |
| Immediate post-<br>biopsy<br>questionnaire      |                                                            |                | X                 |                          |                  |                                   |                      |                                   |                                        |
| Follow up for<br>results of tests               |                                                            |                |                   | X                        |                  |                                   |                      |                                   |                                        |
| Treatment<br>decision <sup>8</sup>              |                                                            |                |                   | X                        |                  |                                   |                      |                                   |                                        |
| 30-day post-<br>biopsy<br>questionnaire         |                                                            |                |                   | X                        |                  |                                   |                      |                                   |                                        |
| AE/SAE                                          | Complete as required at any time following<br>registration |                |                   |                          |                  |                                   |                      |                                   | X                                      |
| Withdrawal<br>Form                              | Complete as required at any time following<br>registration |                |                   |                          |                  |                                   |                      |                                   |                                        |
| ConMeds Form                                    | Complete as required at any time following<br>registration |                |                   |                          |                  |                                   |                      |                                   |                                        |

12922  
12923

---

12924 <sup>1</sup>Urine sample will be required ONLY if the subject has agreed to the Correlative Science  
12925 collection, for PRE and POST DRE urine samples. See correlative manual for instruction.  
12926 <sup>2</sup>Urine samples will be collected at select visits, this may include 2 samples, 'Random-First  
12927 catch' and post-DRE samples. See the Correlative Science Manual for further details on  
12928 collection and processing.  
12929 <sup>3</sup>Collected at baseline, and annually.  
12930 <sup>4</sup> tissue should be obtained if subject has agreed to the Correlative Science component. See  
12931 correlative manual for instruction.  
12932 <sup>5</sup> Creatinine requirements as per institutional Radiology (MRI) SOPs  
12933 <sup>6</sup>PSA greater than 3 months of randomization, must be repeated at screening  
12934 <sup>7</sup> See protocol Section 10.11.1: If MRI indicates a target, biopsy must be done, and tissue  
12935 obtained for correlative science studies if subject has agreed to the Correlative Science  
12936 component. See correlative manual for instruction.  
12937 <sup>8</sup>After treatment decision men revert to standard of care.  
12938  
12939  
12940  
12941  
12942  
12943  
12944  
12945  
12946  
12947  
12948  
12949  
12950  
12951  
12952  
12953  
12954  
12955  
12956  
12957  
12958  
12959  
12960  
12961  
12962  
12963  
12964  
12965  
12966  
12967  
12968  
12969  
12970  
12971  
12972  
12973  
12974

12975  
 12976  
 12977  
 12978

**Table 3: ARM B: Men randomized to systematic TRUS guided biopsy arm**

|                                                 | <u>Visit 1</u><br>Screening/<br>Randomization           | <u>Visit 2</u> | <u>Visit 3</u><br>Biopsy | <u>Visit 4</u><br>Post-<br>test<br>visit | <u>Visit 5</u><br>6 mos | <u>Visit 6</u><br>1 year<br>follow<br>up | <u>Visit 7</u><br>18 mos | <u>Visit 8</u><br>2 year<br>follow<br>up | EOS<br>Intervention<br>/withdrawal |
|-------------------------------------------------|---------------------------------------------------------|----------------|--------------------------|------------------------------------------|-------------------------|------------------------------------------|--------------------------|------------------------------------------|------------------------------------|
| <b>Weeks:</b>                                   | 0                                                       | 1              | 2                        | 6                                        | 26                      | 52                                       | 52                       | 104                                      |                                    |
| Consent                                         | X                                                       |                |                          |                                          |                         |                                          |                          |                                          |                                    |
| Screening<br>(eligibility review,<br>med hx)    | X                                                       |                |                          |                                          |                         |                                          |                          |                                          |                                    |
| Vitals,                                         | X                                                       |                |                          |                                          |                         | X                                        |                          | X                                        |                                    |
| DRE <sup>1</sup>                                | X <sup>1</sup>                                          |                |                          |                                          |                         | X                                        |                          | X                                        |                                    |
| Randomization                                   | X                                                       |                |                          |                                          |                         |                                          |                          |                                          |                                    |
| EQ-5D-5L                                        | X                                                       |                |                          | X                                        |                         |                                          |                          | X                                        | X                                  |
| Correlative<br>sample<br>collection:<br>• blood | X                                                       |                |                          |                                          | X                       | X                                        | X                        | X                                        |                                    |
| • urine <sup>2</sup>                            | X                                                       |                |                          |                                          |                         | X                                        |                          | X                                        |                                    |
| • Semen                                         | X                                                       |                |                          |                                          |                         | X                                        |                          | X                                        |                                    |
| • tissue                                        |                                                         |                | X                        |                                          |                         |                                          |                          |                                          |                                    |
| Creatinine <sup>4</sup>                         | X <sup>4</sup>                                          |                |                          |                                          |                         |                                          |                          |                                          |                                    |
| PSA <sup>5</sup>                                | X <sup>5</sup>                                          |                |                          |                                          | X                       | X                                        | X                        | X                                        | X                                  |
| Systematic TRUS<br>guided biopsy                |                                                         |                | X                        |                                          |                         |                                          |                          |                                          |                                    |
| MRI <sup>6</sup>                                |                                                         |                |                          |                                          |                         |                                          |                          | X <sup>6</sup>                           |                                    |
| MRI-Targeted<br>Biopsy                          |                                                         |                |                          |                                          |                         |                                          |                          | X <sup>6</sup>                           |                                    |
| Immediate post-<br>biopsy<br>questionnaire      |                                                         |                | X                        |                                          |                         |                                          |                          |                                          |                                    |
| Follow up for<br>results of tests               |                                                         |                |                          | X                                        |                         |                                          |                          |                                          |                                    |
| Treatment<br>decision <sup>7</sup>              |                                                         |                |                          | X                                        |                         |                                          |                          |                                          |                                    |
| 30-day post-<br>biopsy<br>questionnaire         |                                                         |                |                          | X                                        |                         |                                          |                          |                                          |                                    |
|                                                 |                                                         |                |                          |                                          |                         |                                          |                          |                                          |                                    |
| AE/SAE                                          | Complete as required at any time following registration |                |                          |                                          |                         |                                          |                          |                                          | X                                  |
| Withdrawal Form                                 | Complete as required at any time following registration |                |                          |                                          |                         |                                          |                          |                                          |                                    |
| ConMeds Form                                    | Complete as required at any time following registration |                |                          |                                          |                         |                                          |                          |                                          |                                    |

12979

12980 <sup>1</sup>Urine sample will be required ONLY if the subject has agreed to the Correlative Science  
12981 collection, for PRE and POST DRE urine samples. See correlative manual for instruction.

12982 <sup>2</sup>Urine samples will be collected at select visits, this may include 2 samples, 'Random-First  
12983 catch' and post-DRE samples. See the Correlative Science Manual for further details on  
12984 collection and processing.

12985 <sup>3</sup>Collected at baseline, and annually.

12986 <sup>4</sup> Creatinine requirements as per institutional Radiology (MRI) SOPs

12987 <sup>5</sup>PSA greater than 3 months of randomization, must be repeated at screening

12988 <sup>6</sup> See protocol Section 10.11.1: If MRI indicates a target, biopsy must be done, and tissue  
12989 obtained for correlative science studies if subject has agreed to the Correlative Science  
12990 component. See correlative manual for instruction.

12991 <sup>7</sup>After treatment decision men revert to standard of care.

12992

12993

## 12994 **10. Trial Interventions and procedures**

12995

12996 The following procedures will be applied as necessary to subjects enrolled in both  
12997 arm of the trial.

### 12998 **10.1 EQ-5D-5L Questionnaires**

12999

#### 13000 **For all subjects enrolled in trial**

13001 Once enrolled into the study, all men will be asked to fill out an EQ-5D-5L  
13002 questionnaire (Appendix 4), which is a validated 2-page questionnaire which aims to  
13003 evaluate health related quality of life. It takes approximately 2 minutes to complete.

- 13004 • All subjects should complete the baseline questionnaire at the screening visit  
13005 before leaving the department.
- 13006 • Subjects who have a normal MRI and do not require a biopsy will complete an  
13007 EQ-5D-5L questionnaire at Visit 4.
- 13008 • Subjects undergoing MRI-targeted biopsy or a systematic TRUS guided biopsy will  
13009 be given an EQ-5D-5L questionnaire to fill out at 30 days post biopsy. The date  
13010 that the subject should fill out the questionnaires should be written on top of the  
13011 questionnaire. (This can also be done at Visit 4).
- 13012 • All subjects should complete the EQ-5D-5L questionnaire at the 2 year follow up  
13013 visit.

13014

13015

### 13016 **10.2 Multiparametric MRI imaging procedure**

#### 13017 **For subjects in Arm A only**

13018

#### 13019 **10.2.1 MRI Protocol**

13020 A non-endorectal coil MRI will be carried out in 3.0 Tesla scanner with a pelvic  
13021 phased array coil and an automated injector system with the subject in the supine  
13022 position. T2-weighted (T2W), diffusion weighted (DWI) and dynamic contrast

---

13023 enhanced (DCE) scans will be acquired as per the requirements set out by PI-RADS  
13024 v2.  
13025  
13026 Within the specified PI-RADS 2 framework a common protocol will be formulated by  
13027 a consensus of the radiologists involved in the trial at each site at a startup meeting.  
13028 The highest agreed upon b-value image for DWI (at least 1400s/mm<sup>2</sup>) will be  
13029 selected for all sites to ensure consistency. Similarly, the spatial resolution, contrast  
13030 media, injection rates and dynamic scanning temporal resolution will be matched for  
13031 all sites. An optional multi b value DWI acquisition will be undertaken as well to  
13032 allow for ancillary studies into non log linear apparent diffusion coefficient (ADC)  
13033 models for tumor characterization. This is summarized in an MRI Operations Manual  
13034  
13035  
13036 Subjects will be asked to follow their local standard of care MRI examination  
13037 preparation instructions for the MRI procedure.

### 13038 **10.2.2 MRI reporting**

13039 The MRI will be reported by an experienced radiologist using the MRI Reporting  
13040 Proforma(See Appendix 2) to be filed in the study folder. The MPMRI will be scored  
13041 based on the PI-RADS v2 scoring system [2]. Radiologists will also provide a 5  
13042 pointLikert score for purposes of comparison. Biopsy decisions will be based on the  
13043 PI-RADS scores.

13044  
13045

13046 Lesions in the prostate will be scored on the following scale:

- 13047 PI-RADS 1 – Very low (clinically significant cancer is highly unlikely to be  
13048 present)
- 13049 PI-RADS 2 – Low (clinically significant cancer is unlikely to be present)
- 13050 PI-RADS 3 – Intermediate (the presence of clinically significant cancer is  
13051 equivocal)
- 13052 PI-RADS 4 – High (clinically significant cancer is likely to be present)
- 13053 PI-RADS 5 – Very high (clinically significant cancer is highly likely to be  
13054 present)

13055

13056 The location of the suspicious areas in the prostate should be marked on a diagram  
13057 of the prostate (see Appendix2) and the sector numbers containing each suspicious  
13058 area should be recorded in the case report form.

13059

13060 Radiologists will be blinded to the PSA.

13061

13062

13063 Imaging interpretation will be carried out at each site, however ensuring consistency  
13064 and quality of imaging interpretation is crucial. A central imaging site will be  
13065 designated with a lead radiologist (Sunnybrook, MH). A single radiologist at each site  
13066 will perform the interpretation of all images for that site. The designated radiologist  
13067 must have experience of interpreting at least 200 MRI's using PI-RADS 1 or 2.A  
13068 startup meeting involving all radiologists will be held prior to start of accrual where  
13069 each site will bring 5 MRI cases performed at their site for consensus review, scoring

---

13070 and discussion. This will provide a commonality of approach to interpretation among  
13071 the radiologists before the study begins. After this startup meeting each site will  
13072 send one set of MRI images and its interpretation for central review for site  
13073 qualification.

13074  
13075 A copy of all images will be sent on CD/DVD to the central site for archiving.

### 13076 **10.3 No target identified on MPMRI (PI-RADS 1 or 2)**

#### 13077 **For subjects in Arm A only, who do not require a biopsy**

13078 Men who have MRIs that do not identify any suspicious lesion will not receive a  
13079 biopsy. These subjects will benefit from being part of the trial as a result of not  
13080 having to undergo an invasive biopsy procedure, avoiding the discomfort associated  
13081 with the procedure, the risk of being diagnosed with clinically insignificant cancer  
13082 and the risk of sepsis associated with the biopsy procedure. Studies suggest that if  
13083 the MRI does not identify areas suspicious for cancer there is an 85-95% chance that  
13084 clinically significant cancer is not present [28, 34, 35].

13085  
13086 As soon as the results of the MRI are discussed with the subject, their treatment  
13087 decision will be recorded and they will return to standard of care management. As  
13088 part of standard of care these subjects can undergo further PSA surveillance and / or  
13089 prostate biopsies if indicated.

### 13090 **10.4 MRI-Targeted biopsy**

#### 13091 **For subjects in Arm A who do require a biopsy**

#### 13092 **10.4.1 MRI choice of targets for targeted biopsy**

13093 Men whose prostates contain a suspicious area with a PI-RADS score of 3,4 or 5 will  
13094 subsequently undergo targeted biopsy by a Urologist or Radiologist experienced in  
13095 MRI-targeted biopsy. Operator experience (number of targeted biopsies performed  
13096 to date) will be recorded before each procedure. The number of biopsy operators  
13097 should be kept to the minimum number possible.

13098  
13099 Targets will be stratified by PI-RADS score and if the same score then by size and  
13100 labeled T1, T2, T3...etc. If there are more than 3 lesions with a score of 3 or more  
13101 only T1-T3 will be targeted. The radiologist should record the sectors involved with  
13102 tumor in order of most to least involved using the PI-RADS v2 sector scheme.  
13103 The number of biopsy operators should be kept to the minimum number possible.

13104  
13105 Subjects in the MRI cohort will not have systematic biopsies, with one exception.  
13106 Those whose MRI is grade 3M (a multifocal pattern suggesting multifocal small  
13107 volume cancer, with PSA Density >0.15 and no focal lesion), a systematic 12 core  
13108 biopsy will be conducted.

#### 13109 **10.4.2 MRI Biopsy**

13110 The procedure will be performed in the outpatient departments of sites possessing  
13111 the required equipment by a clinician competent in TRUS/MRI-targeted biopsy. An  
13112 operator must have performed at least 50 targeted biopsy cases on the TRUS/MRI

---

13113 fusion system at their institution before they are qualified to participate as an  
13114 operator in the study.  
13115  
13116 Coumarin anticoagulant, clopidogrel treatment and other relevant  
13117 anticoagulants/antiplatelets will be discontinued up to 10 days before biopsy and  
13118 advice sought as to appropriate substitutes if indicated. Aspirin will be continued at  
13119 the discretion of the physician doing the biopsy.  
13120  
13121 Prophylactic quinolone antibiotics shall be given as per local guidelines. Biopsies will  
13122 be performed via the trans-rectal route or via the trans-perineal route depending  
13123 upon local practice.  
13124  
13125 Targeted biopsies should be performed by software-assisted fusion devices  
13126 (i.e.(Artemis, made by Eigen, or Urostation, by Koelis)[34, 36, 37, 40,41].This  
13127 software is safe and poses no risks to the subject since the same CE-marked  
13128 ultrasound probes that are designed to perform the biopsy when performed as  
13129 standard of care biopsy are used during targeted biopsy. Should the operator wish to  
13130 not use the information provided by the software registration system and use  
13131 cognitive (visual) registration alone they can do so, but should indicate this on the  
13132 subject's case report form.  
13133  
13134 The samples per target will be 4cores spread across the target region for a maximum  
13135 total of 12 cores as a maximum of 3 targets can be identified. Biopsies should be  
13136 conducted in order meaning T1 then T2 then T3.  
13137  
13138 Biopsy cores from different suspicious areas will be aliquoted separately. The vials  
13139 will be labeled "T1a-d", "T2a-d" and "T3a-d" (according to how many targets there  
13140 are) which should match the assignment of suspicious areas by the radiologist on the  
13141 MRI report. The order of lettering a-d should match the order in which the biopsies  
13142 were performed in each region. The first biopsy should be at the center of the target  
13143 and the remaining fanning out from the center. Each core from the same suspicious  
13144 area must be submitted separately. Alternative methods of storing cores that allow  
13145 identification of the order of score samples from each target are acceptable.  
13146

## 13147 **10.5 Systematic TRUS guided biopsy**

### 13148 **For all subjects in Arm B**

13149 Systematic TRUS guided biopsy is the current standard of care for the diagnosis of  
13150 prostate cancer [4, 17]. Systematic TRUS guided biopsy can be performed at the local  
13151 site of recruitment.  
13152

13153 A clinician competent in systematic TRUS guided biopsy will perform the procedure.  
13154 The experience of the operator (number of systematic TRUS guided biopsies  
13155 performed to date) will be recorded prior to each procedure. Software that guides  
13156 clinicians in placing biopsy cores should not be used.  
13157

13158 Coumarin anticoagulant, clopidogrel treatment and other relevant  
13159 anticoagulant/antiplatelet medication will be discontinued5 to 10 days before biopsy

---

13160 and advice sought as to appropriate substitutes if indicated. Aspirin will be continued  
13161 at the discretion of the physician doing the biopsy.

13162

13163 The subject will be positioned in left lateral position. 10-12 core biopsies will be  
13164 taken as per guidelines [42] under appropriate anaesthesia. Biopsies will be directed  
13165 to the peripheral zone (See Appendix 3 for standardized method for conducting 12-  
13166 core systematic TRUS guided biopsy). Prophylactic quinolone antibiotics shall be  
13167 given as per local guidelines.

## 13168 **10.6 Pathology**

13169 The 2005 International Society of Urological Pathology guidelines for Gleason  
13170 Grading of Prostatic Carcinoma will be followed [43].

13171

13172 For men undergoing MRI-targeted biopsy it is required that pathology reported per  
13173 suspicious area targeted and per targeted core. For systematic TRUS guided biopsy,  
13174 each core will be reported and graded.

## 13175 **10.7 Post-procedural care**

### 13176 **For all subjects in ARMS A and B receiving a biopsy**

13177 After a biopsy procedure the subject can be discharged within 2-3 weeks for results  
13178 of the histopathology and treatment options to be discussed.

## 13179 **10.8 Immediate post-biopsy questionnaire**

### 13180 **For all subjects in ARMS A and B receiving a biopsy**

13181 A modified version of a self-reported questionnaire validated previously [39] in the  
13182 assessment of post-biopsy complications will be completed immediately post-biopsy  
13183 after MRI-TB and after systematic TRUS guided biopsy (Appendix 7). The subject  
13184 should complete the immediate post-biopsy questionnaire before they leave the  
13185 department. It aims to assess intensity of discomfort and pain associated with the  
13186 procedure.

## 13187 **10.9 30-day post-biopsy questionnaire**

### 13188 **For all subjects in ARMS A and B receiving a biopsy**

13189 A modified version of a self-reported questionnaire validated previously [39] in the  
13190 assessment of post-biopsy complications at 30 days post-biopsy should be given to  
13191 all subjects undergoing MRI-TB or systematic TRUS guided biopsy to take home  
13192 (Appendix 8). The subject should fill this out on day 30 following the procedure. It  
13193 should take 5 minutes to fill out. The date that the participant should complete the  
13194 questionnaire should be written on top of the questionnaire. Data on specific biopsy-  
13195 related complications including pain, fever, hematuria, hematochezia,  
13196 hematospermia, urinary retention and urinary incontinence will be recorded. Any  
13197 other adverse events will not be recorded. Contact with healthcare and resource  
13198 used data following the biopsy will also be ascertained. The completed questionnaire  
13199 can be returned to the investigator in a pre-addressed envelope.

13200

13201 Subjects should be reminded at 30 days to complete this questionnaire.



---

13202 **10.10 Results and treatment decision (Visit 4)**

13203 The results of the biopsies and/or MRI will be explained to the subject by the clinical  
13204 care team during this visit, which is approximately 2-3 weeks after the biopsy.

13205 The research team should record the treatment decision in the subject file.

13206 Possibilities for treatment decision include but are not limited to:

- 13207 • Further diagnostic test (e.g. PSA, biopsy, MRI)
- 13208 • Active Surveillance
- 13209 • Radical treatment (e.g. radical prostatectomy, radical radiotherapy)
- 13210 • Focal therapy (e.g. high intensity focused ultrasound, cryotherapy)
- 13211 • Hormone therapy

13212 **10.11 Follow up period**

13213 All study participants will be followed up for up to two years or until they have  
13214 radical treatment. Each year, subjects will be surveyed to obtain the following  
13215 information:

- 13216 • time to cancer diagnosis
- 13217 • Gleason score progression
- 13218 • time to intervention on active surveillance
- 13219 • time on active surveillance
- 13220 • PSA
- 13221 • All subjects in both Arm A and B who have remained either undiagnosed or  
13222 untreated (on active surveillance) will have a follow up MRI 2 years after  
13223 study entry.

13224

13225 **10.11.1 Indications for biopsies off protocol**

13226 For subjects who are not biopsied due to a negative MRI, have negative or non-  
13227 significant systematic biopsies, or who have a positive MRI but no or non-significant  
13228 cancer on targeted biopsy, the following are guidelines for subjects management  
13229 during the 2 year follow up period.

13230 It is an accepted standard of care in Ontario for subjects on active surveillance or  
13231 with a prior negative biopsy who have a worsening risk profile to undergo mpMRI  
13232 followed by targeted biopsy. We propose the following guidelines for risk profile  
13233 assessment and consideration of repeat biopsy

13234 Subjects should continue to be followed with semi-annual PSA and DRE (not  
13235 required, at the discretion of the PI). A biopsy should be considered under one or  
13236 more of the following circumstances:

- 13237 1. For men with PSA density < 0.15, biopsy if an increase in PSA density > 0.15.
- 13238 2. For men with PSA density > 0.15, or a baseline PSA > 10, biopsy if a 50% increase  
13239 in PSA in 1 year.
- 13240 3. Biopsy if a doubling of the risk of high grade cancer according to the NCI  
13241 nomogram.

---

13242 4. Biopsy if development of a suspicious nodule on DRE.  
13243  
13244 5. For men with a positive study MRI (especially PI-RADS 4 or 5) and a  
13245 targeted biopsy which was negative or showed only Gleason 6 cancer, biopsy if  
13246 there is a 50% or more increase in PSA over 1 year or a PSA density > 0.15.  
13247  
13248 30. For men on the systematic biopsy arm which was negative or showed only  
13249 Gleason 6 cancer, biopsy if there is a 50% or more increase in PSA over 1 year or  
13250 a PSA density > 0.15. An MRI and targeted biopsy may be warranted in these  
13251 subjects.  
13252  
13253  
13254 These are guidelines and should be interpreted with clinical judgment.  
13255  
13256 Follow-up will cease once treatment beyond active surveillance is undertaken  
13257 (prostatectomy, radiation therapy, focal therapy, etc.)  
13258 PSA and biopsy results will be evaluated in subjects in whom the 2 year MRI  
13259 identifies a target.

## 13260 **10.12 Additional tests for biomarker discovery - Optional**

13261 Though not related to the primary outcome of this study, this cohort represents a  
13262 unique opportunity to obtain human samples for future biomarker discovery studies.  
13263 Participants will be consented to provide a blood, urinesemen, and tissue sample  
13264 after the consent and screen visit, and subsequent visits for storage and use in future  
13265 biomarker studies. In addition, men will be consented for use of the prostate biopsy  
13266 tissue in the biomarker discovery studies.  
13267

13268 We propose two initial biomarker analyses for men recruited to the PRECISE study.  
13269 First we propose testing the utility of several genetic assays. These include the  
13270 SELECT MDx test (a urine based genomic assay), the Telo PC test (an analysis of  
13271 telomere structure in circulating tumour cells), the Exosome Dx assay (urine based  
13272 exosome assay), the Mitomics assay (circulating mitochondrial DNA deletion assay),  
13273 and the MDNA test (a urine based microRNA assay). We will test the hypothesis that  
13274 alongside conventional PSA measurements, these tests may identify subjects whose  
13275 MRI was initially negative for prostate cancer, but who are at high risk of harboring  
13276 clinically significant disease as detected by the secondary MRI at 2 years. We will  
13277 also test the association between serum biomarkers and clinically significant or  
13278 clinically insignificant prostate cancer detected during the PRECISE study. We will  
13279 also explore the potential for these assays to provide additional information over  
13280 and above Gleason grade. These studies will be separately funded from PRECISE.  
13281

13282 Sequential blood sampling during the 2 years of follow up (prior to a 2 year MRI) will  
13283 be planned to assess markers which might identify men at higher risk of developing  
13284 prostate cancer.

---

13285 **10.12.1 Samples to be collected for future biomarker discovery work**  
13286 **(Optional)**

13287 Participants will be asked to consent to provide a blood, urinesemen and tissue  
13288 sample after the consent and screen visit and subsequent visits for storage and use  
13289 in future biomarker studies. This will involve a separate consent form.

13290 Samples include:

- 13291 • Blood –10mls serum, 15mls plasma, 10mls whole blood, 5mls buffy coat
- 13292 • Urine – 75 mls urine
- 13293 • Semen 1-5cc (single ejaculate)
- 13294 • Tissue-unstained biopsy sections -15 unstained slides from cancer, and  
13295 -15 unstained slide from non-cancer cores  
13296 (if possible)

13297

13298 **10.12.2 Correlative Science Component**

13299

13300 Within this protocol biomarker and genetic validation studies and biomarker  
13301 discovery research will be incorporated to correlate molecular readouts with the  
13302 presence of Gleason 4 or 5 pattern on biopsy. The goal of these studies is to  
13303 develop a liquid based assay (serum, plasma, CTCs, urine semen  
13304 ) which accurately predicts the presence of clinically significant cancer. The  
13305 correlative science component of Precise constitutes a major initiative, with multiple  
13306 collaborators and planned studies. These are briefly summarized below.

13307

13308 Biomaterials (serum, plasma, buffy coat, PRE/POST DRE urine and tissue from  
13309 biopsies) will be collected at times specified in the protocol. Sample collection will be  
13310 restricted to subjects who have agreed to provide these samples in a separate  
13311 optional informed consent. If a subject withdraws consent for the additional  
13312 biomarker and genetic testing, subject's samples will be destroyed. The investigator  
13313 must notify the sponsor site contact who will request the samples destruction.

13314 Biomaterials for the correlative science studies will be identified with a unique  
13315 identification code, date of collection and will not contain any personal identification  
13316 information. The samples will be shipped to a secure long-term storage facility,  
13317 identified as the Ontario Institute for Cancer Research, located at 661 University Ave,  
13318 Suite 510, Toronto, ON M5G 0A3. Samples for the correlative science studies will be  
13319 shipped stored and analyzed according to specified, specialized procedures in the  
13320 Precise Correlative Science Manual.

13321

13322 Biomaterial will be stored, anonymized, at the Ontario Institute of Cancer Research  
13323 (OICR) Biobank, under the direction of Dr. John Bartlett. Dr. Bartlett is the Program  
13324 Director, [Diagnostic Development](#), at OICR. The material will not be used for  
13325 commercial purposes. No personal information will be kept at OICR. Personal  
13326 identifying information on the patients in the PRECISE trial is held by the Ontario  
13327 Clinical Oncology Group (OCOG), who are performing the data management function  
13328 for the study. Access to the biomaterial will be under the control of the PRECISE  
13329 steering committee. Access has already been approved for the Translational  
13330 Research in Prostate Cancer (TRIPC) research group led by Dr. Paul Boutros. Future

---

13331 researchers interested in using the biomaterial will apply to the Precise steering  
13332 committee for approval, based on the scientific merit of the study.  
13333  
13334 A group of investigators led by Drs. Paul Boutros (OICR) and George Rodriguez  
13335 (UWO) have obtained funding for a correlative science study nested in the Precise  
13336 trial. This study is termed the 'Translational Research Initiative in Prostate Cancer',  
13337 or TRIPC. Biomaterial will be collected for these studies as above. A summary of  
13338 the planned studies is as follows:  
13339  
13340 Urine: The TRIPC project will measure the proteomes of urine specimens using  
13341 either a whole proteome assay or Selective Reaction Monitoring - Mass  
13342 Spectroscopy (SRM-MS) or Peptide Reaction Mass Spectroscopy (PRM-MS) for a  
13343 panel of ~50 peptides. These peptides will be used to score two published  
13344 biomarkers of disease aggressivity  
13345 (<https://www.nature.com/articles/ncomms11906>). The PRECISE data will then be  
13346 used to retrain the parameters and weights of the biomarkers as an exploratory  
13347 analysis.  
13348  
13349 Blood: Genotypes will be measured using either DNA-sequencing or genotyping  
13350 arrays. The resulting data will be used to score five distinct biomarkers: a germline-  
13351 incidence biomarker created by the PRACTICAL GWAS consortium, a biomarker of  
13352 aggressive prostate cancer created by the PRACTICAL GWAS consortium, a panel of  
13353 DNA repair genes identified by the SU2C group and two biomarkers of disease  
13354 aggression identified by the CPC-GENE network. The PRECISE data will then be used  
13355 to retrain the parameters and weights of the CPC-GENE biomarkers as an  
13356 exploratory analysis. Second, methylation of cell-free DNA will be assessed using  
13357 microarray platforms (either tiling or CpG island arrays) to score two existing  
13358 signatures of aggressive prostate cancer.  
13359  
13360 Tissue  
13361 Tumour biopsies will be subject to OncoScan microarray profiling and/or DNA  
13362 sequencing to measure methylome, somatic single nucleotide variants, copy number  
13363 aberrations, genomic rearrangements and mitochondrial copy number. Seven  
13364 signatures of aggressive prostate cancer will be scored: the proportion of the  
13365 genome altered (PGA, Lalonde et al. Lancet Oncology), 100-locus and 31-locus  
13366 signatures (Lalonde et al. European Urology), a multi-modal signature (Fraser et al.  
13367 Nature), a mitochondrial signature (Hopkins et al. Nature Communications), and two  
13368 unpublished signatures developed by the CPC-GENE network: of tumour evolution  
13369 and of the tumour methylome. The PRECISE data will be used to retrain the  
13370 parameters and weights of the biomarkers as an exploratory analysis.  
13371  
13372  
13373 A second group led by Dr. Keith Jarvi, will analyze semen for biomarkers of  
13374 significant prostate cancer. They will utilize **deep targeted Next Generation**  
13375 **sequencing of cell free DNA and tumor cells isolated from semen.**  
13376  
13377 • **Contact Information:** Dr. Keith Jarvi  
13378 Murray Koffler Urologic Wellness Centre, 60 Murray Street, 6/F

13379  
13380  
13381  
13382  
13383  
13384  
13385  
13386  
13387  
13388  
13389  
13390  
13391  
13392  
13393  
13394  
13395  
13396  
13397  
13398  
13399  
13400  
13401  
13402  
13403  
13404  
13405  
13406  
13407  
13408  
13409  
13410  
13411  
13412  
13413  
13414  
13415  
13416  
13417  
13418  
13419  
13420  
13421  
13422  
13423  
13424  
13425  
13426

---

Toronto, ON M5T 3L9

Semen has potentially high amounts of exfoliated prostate epithelial cells and high concentrations of prostate derived cell free DNA amenable to measurement by the deep next generation DNA sequencing. The clear advantage of semen is its use as a fluid for biomarker identification as well as a clinical specimen for non-invasive diagnostics. In addition, semen and SP analysis may facilitate early cancer diagnosis since exfoliated PCa cells and PCa specific cell free DNA will appear in semen much earlier and prior to destruction of prostate blood barrier and diffusion of cells and cell free DNA into the blood.

Dr. Jarvi's group will focus on known gene fusions and point mutations in exomes of genes frequently mutated in PCa. They used the next generation DNA sequencing data uploaded to the cBioPortal. That included 841 primary prostate cancer tissues sequences by the Cancer Genome Atlas, Broad Institute and Memorial Sloan Kettering Cancer Centre. As a result, they identified a panel of 30 genes (26 genes with 271 recurrent or potentially recurrent missense mutations and 4 gene fusions) which provided sensitivity of 92 % at theoretical 100% specificity for detection of PCa. Upon protocol optimization, they will first complete a pilot study and sequence cell free DNA in 24 SP samples from men with PCa, 12 seminal plasma (SP) samples from men with a negative biopsy and 12 SP samples from healthy fertile men. They will then validate the diagnostic performance of the 30 gene panel in 288 SP samples from men with low grade, intermediate grade, high grade PCa, negative biopsy, prostate inflammation and healthy men.

They will also develop an approach for immunomagnetic isolation of prostate epithelial cells and PCa cells from semen. They propose that PCa cells isolated from semen may function as a non invasive 'liquid biopsy' tool for the accurate diagnosis and subtyping of PCa. Exfoliated prostate epithelial cells and PCa cells will be isolated using magnetic beads coated with monoclonal antibodies or high affinity aptamers for the prostate specific membrane antigen (PSMA). Since PSMA is cell surface protein exclusively expressed in prostate cells, this procedure will enrich prostate epithelial cells and PCa cells, but despite spermatozoa and leukocytes. Protocols for cell isolation will include the use of either centrifugation or magnetic activated cell sorting. Genomic DNA will be extracted, purified and analyzed by the next generation sequencing. Using semen samples from post vasectomy semen, they will investigate the impact of spermatozoa on the efficiency of isolation of prostate epithelial cells.

The following collaborators will also be receiving biomaterial specimens (blood and/or urine semen). The goals of each of these groups is to correlate a biomarker readout with the likelihood of prostate cancer, and of clinically significant cancer. The planned assays are summarized briefly as follows

- 3D Signatures  
MaRS Centre, South Tower  
101 College Street, Suite 200  
Toronto, Ontario, Canada M5G 1L7

---

13427

13428 This group will be examining the telomere structure of circulating tumour cells  
13429 (CTCs) using an established assay, the Telo PC test. The results of a 50 patient  
13430 prostate cancer pilot study in men with intermediate risk prostate cancer who  
13431 underwent radical prostatectomy showed that the TeloPC assay correctly predicted  
13432 the status/aggressiveness of disease in each of the study's patients.<sup>1</sup> While all  
13433 patients were diagnosed as intermediate risk using conventional biopsies prior to  
13434 surgery, only 21 of the 50 patients who underwent RP showed disease upgrading  
13435 upon post-surgical analysis and therefore were suitable for prostate removal. The  
13436 TeloPC assay correctly predicted that 29 of the 50 patients had a stable form of  
13437 prostate cancer.

13438

13439 The TeloPC assay includes filtration-based circulating tumour cell (CTC) enrichment  
13440 combined with 3-dimensional (3D) analysis of telomeres to obtain 3D telomere  
13441 profiles of PCa patients with low-intermediate risk category.

13442

- MiR Diagnostics  
13443 1 Discovery Drive  
13444 Rensselaer, NY 12144

13445

13446 This group will be examining urinary microRNAs and other non-coding RNAs from  
13447 urinary exosomes. A panel of 56 miRNAs and snoRNAs, which have been  
13448 demonstrated to be predictive of clinically significant prostate cancer, will be  
13449 interrogated. The urine samples will be used to establish the sensitivity of the  
13450 procedures and the precision of the analytic algorithms to identify those with  
13451 significant prostate cancer. The long term goal of the project is to develop a non-  
13452 invasive methodology that can be used to identify genetic alterations that identify a  
13453 group of patients at high risk for clinically significant prostate cancer.

13454

13455

13456

13457

- Exosome Diagnostics, Inc.  
13458 266 2 nd Ave.  
13459 Waltham, MA 02451

13460

13461 This group will be interrogating non-coding RNAs extracted from urinary exosomes.  
13462 They will assay exosomal RNA for three biomarkers known to be expressed in men  
13463 with high-grade prostate cancer, using an algorithm that integrates this three-gene  
13464 signature,

13465

13466

- MDNA Life Sciences, Inc.  
13467 2054 Vista Parkway, Suite 400  
13468 West Palm Beach, FL 33411

13469

13470 This group will evaluate the performance of the Prostate Mitomics test. This is a  
13471 blood-based screening test which evaluates free plasma DNA for the presence of a  
13472 mitochondrial DNA deletion. This deletion has been demonstrated to be associated  
13473 with high grade prostate cancer. Nucleic acids will be extracted from each plasma

---

13474 sample using a commercially available reagent kit. The Prostate Mitomic Test is a  
13475 quantitative real-time PCR test for a 3.4kb mitochondrial DNA deletion correlated  
13476 with prostate cancer. Each sample will also be profiled for novel mitochondrial  
13477 DNA mutations using standard laboratory techniques such as quantitative real-time  
13478 PCR. Mutation frequency will be compared to clinical outcomes.

13479  
13480

- 13481 • MDx Health, Inc  
13482 15279 Alton Parkway, Suite 100  
13483 Irvine, CA 926188

13484

13485 This group will perform the Select MDx assay, a two gene mRNA assay performed on  
13486 urine, to evaluate its performance in predicting the presence of clinically significant  
13487 prostate cancer.

13488

### 13489 **10.13 Long-term data linkage – Permission to Contact**

13490 The cohort of men who consent to participate in this study represent a uniquely  
13491 characterized group. Their long-term outcomes will contribute to our understanding  
13492 of the epidemiology of prostate cancer beyond the questions being addressed in this  
13493 study.

13494

13495 Permission to Contact (PTC) is a feasible mechanism to engage subjects in research  
13496 programs. This will allow researchers to contact study participants in the future to  
13497 assess their willingness to respond to questionnaires. This potentially enables  
13498 research that would complement the planned long-term follow up in terms of health  
13499 status, for obtaining information about future biopsies not included in the study, and  
13500 allow assessment of quality of life.

### 13501 **10.14 End of Study**

13502 The end of study assessment comprises an essential safety evaluation that should be  
13503 completed prior to discharging any subject from the study.

- 13504 • Adverse events;
- 13505 • PSA measurement;
- 13506 • EQ-5D-5L questionnaire;
- 13507 • An MRI in those who did NOT have a biopsy;
- 13508 • Complete CRF.

### 13509 **10.15 Risks and Benefits to Participants**

13510 An important consideration of this study is that men are being randomized to one of  
13511 two biopsy techniques when it is not known which will be more effective. Both  
13512 diagnostic tests are currently used in clinical practice at the institutions involved in  
13513 the trial. Though systematic TRUS guided biopsy could be considered standard of  
13514 care, there is enough evidence to support the concept that MRI-targeted biopsy may  
13515 be at least as effective as systematic TRUS guided biopsy[27].

13516 **10.15.1 Risks to subjects**

13517 The intervention proposed in this trial (MRI-biopsy) do not offer participants any  
 13518 more risk than if they underwent standard of care (systematic TRUS guided biopsy)  
 13519 for the diagnosis of prostate cancer.

13520 **10.15.1.1 Risk of Systematic TRUS guided biopsy**

13521 Systematic TRUS guided biopsy can be associated with discomfort, haematuria,  
 13522 haemospermia and dysuria in a large proportion of subjects, which is self-resolving  
 13523 (See Table 4). There is a 4% risk of systemic urosepsis[46].

13524 **10.15.1.2 Risks of MPMRI**

13525 MRI is associated with few risks. It is a safe procedure used in everyday clinical  
 13526 practice (See Table 4). Small risks of allergic reactions are associated with the  
 13527 intravenous administration of gadolinium, the contrast agent used in MRI scans. The  
 13528 study uses a low molecular weight Gd chelate as a contrast agent (Gadovist, Bayer,  
 13529 gadobutrol – generic). This contrast agent is used routinely for contrast enhanced  
 13530 MRI and is approved by Health Canada. Subjects will be screened for any  
 13531 contraindications to Gd injection or to MRI as per current clinical Dept of Medical  
 13532 Imaging protocols at each institution. The commonest reported sides effects are of  
 13533 limited duration and mild to moderate in intensity and include headache,  
 13534 vasodilation, injection site pain, nausea, dizziness, rash, and dyspnea. The incidence  
 13535 of these are <1%. Severe life threatening reactions such as severe anaphylaxis occur  
 13536 very rarely, about 1:10,000-1: 100,000. These are treatable with epinephrine and  
 13537 steroids. The risk of death is <1:100,000. There is a known risk of nephrogenic  
 13538 systemic fibrosis, a potentially fatal condition in subjects with impaired renal  
 13539 function, with an eGFR<30ml/min/1.73m2. These subjects are ineligible for this  
 13540 study.

13541 **10.15.1.3 Risks of MRI-targeted biopsy**

13542 MRI-targeted biopsy is associated with similar risks to the standard of care  
 13543 systematic TRUS guided biopsy. As fewer biopsy cores are being taken with MRI-  
 13544 targeted biopsy, the theoretical risk of adverse events associated may be less than  
 13545 that of systematic TRUS guided biopsy. In addition, as a proportion of men may not  
 13546 require a biopsy (approximately 30%) on a group level there will be reduced number  
 13547 of men experiencing these complications, which is one of the major advantages of an  
 13548 MRI-based approach.

13549

13550 **Table 4: Adverse events associated with procedures**

13551

| Side Effect \ Procedure | Systematic TRUS guided biopsy(Standard of care) | MRI                                                                                     | MRI-targeted biopsy                                         |
|-------------------------|-------------------------------------------------|-----------------------------------------------------------------------------------------|-------------------------------------------------------------|
| Pain / discomfort       | Some have discomfort<br>Some have pain          | Intravenous cannulation (to allow contrast administration) can cause minimal discomfort | Similar / reduced compared to systematic TRUS guided biopsy |



|                                |                                                    |                                                                                                                                                                                               |                                                             |
|--------------------------------|----------------------------------------------------|-----------------------------------------------------------------------------------------------------------------------------------------------------------------------------------------------|-------------------------------------------------------------|
| Dysuria                        | Majority have dysuria (self-resolving in 2-3 days) | No                                                                                                                                                                                            | Similar / reduced compared to systematic TRUS guided biopsy |
| Haematuria                     | Majority (self-resolving, 2-3 days)                | No                                                                                                                                                                                            | Similar / reduced compared to systematic TRUS guided biopsy |
| Haematospermia                 | Majority (self-resolving, 1-2 weeks)               | No                                                                                                                                                                                            | Similar / reduced compared to systematic TRUS guided biopsy |
| Erectile dysfunction           | 30% (self resolving after 1-2 months)              | No                                                                                                                                                                                            | Similar / reduced compared to systematic TRUS guided biopsy |
| Urinary Tract infection        | 1-8 %                                              | No                                                                                                                                                                                            | Similar / reduced compared to systematic TRUS guided biopsy |
| Systemic urosepsis             | 2-4%                                               | No                                                                                                                                                                                            | Similar / reduced compared to systematic TRUS guided biopsy |
| Urinary retention              | 1%                                                 | No                                                                                                                                                                                            | Similar / reduced compared to systematic TRUS guided biopsy |
| Contrast allergy               | N/A                                                | Rare<br>< 1 in 10000 – severe allergic reaction (breathing problems)<br>< 1 in 2000 – moderate allergic reaction (nausea and vomiting)<br>< 1 in 250 – mild allergic reaction (rash, itching) | N/A                                                         |
| Adverse effects of antibiotics | Rare<br><1%                                        | N/A                                                                                                                                                                                           | Rare<br><1%                                                 |

13552

13553

13554

### 13555 **10.15.2 Benefits to subjects**

13556 Subjects enrolled in this trial will benefit from the following:

- 13557 • Subjects in both arms may benefit from receiving a diagnostic test for suspected prostate cancer and will receive further treatment if required. The research team
- 13558 will also ensure streamlined diagnostic investigations to promptly conduct the
- 13559 diagnostic test and communicate the test outcome for the subject.
- 13560
- 13561 • Subjects enrolled in the trial will benefit from the dedicated research team
- 13562 involved in their care in addition to the clinical team normally involved in their
- 13563 care.
- 13564 • Subjects will benefit from additional discussions regarding the trial, which could
- 13565 increase their understanding of prostate cancer and help them to make a more
- 13566 informed decision about their health.

---

13567 • Subjects randomized to the MRI arm may benefit by avoiding a biopsy. This will  
13568 remove any risk of post-biopsy infection. MRI-randomized subjects may also  
13569 benefit from a reduced probability of having a clinically insignificant prostate  
13570 cancer diagnosed. Clinically insignificant prostate cancer is often treated  
13571 definitively per subject preference despite the lack of evidence supporting the  
13572 need. All definitive local therapies for prostate cancer carry the risk of peri-  
13573 operative complications as well as long-term risk of incontinence and erectile  
13574 dysfunction.  
13575

## 13576 **10.16 Concomitant medications**

### 13577 **10.16.1 Permitted Medications**

13578 All concomitant medications taken during the study will be recorded in the CRF with  
13579 indication, dose information and dates of administration. The definition of which  
13580 medication would be considered outside the routine medical practice is up to the  
13581 discretion of the investigator. All dietary and herbal supplement usage will be  
13582 recorded in the CRF.

### 13583 **10.16.2 Non-Drug Therapies**

13584 Any occurrence of prostate-related surgical and/or non-surgical (or minimally  
13585 invasive) intervention during the conduct of the study will be recorded in the CRF.  
13586

## 13587 **11. Schedule of Study Visits**

### 13588 **11.1 Visit 1 (Screening/Randomization): Screening, Consent,** 13589 **Randomization**

#### 13590 **For all subjects enrolled in trial**

13591 Screening will occur any time following the referral of the subject. Ideally, this will be  
13592 performed as soon as possible following receipt of referral.

13593 Subjects will be consented only after they have had time to consider the study. This  
13594 may happen on the same visit as the screening visit.

13595 Randomization can happen immediately after the consent form is signed and  
13596 eligibility is confirmed.

13597

13598 Once enrolled into the study, subjects will be asked to fill out an EQ-5D-5L  
13599 questionnaire (Appendix 4), which is a validated 2-page questionnaire representing  
13600 health related quality of life. It takes approximately 2 minutes to complete. This  
13601 questionnaire should be completed at the screening visit before the subject leaves  
13602 the clinic.

13603

13604 If a subject agrees to the optional informed consent, from randomization until any  
13605 point prior to a biopsy, optional blood, urine semen and tissue samples will be  
13606 collected for correlative studies.

13607

13608 If PSA testing was done greater than 3 months of randomization, this must be  
13609 repeated at screening/Visit 1.

---

13610

13611 **11.2 Visit 2 (MRI): ARM A, for men randomized to MRI**

13612 This will occur approximately within one week of randomization. Men will receive an  
13613 MRI (see Section 10.2.)

13614 **11.3 Visit 3 (Biopsy): ARM A, MRI-Targeted Biopsy of Prostate**

13615 **For men randomized to ARM A, who have a lesion identified by MRI.** This  
13616 appointment will follow approximately one-two weeks of MRI.

13617

13618 Depending on local Urology service structure, an appointment for a biopsy may need  
13619 to be booked at the same time as the MRI is booked (i.e. immediately after  
13620 randomization) in order for a biopsy to occur in timely fashion. If the results of the  
13621 MRI show that a biopsy is not required, then the biopsy appointment can be used  
13622 instead of Visit 4 for follow up of results and treatment decision.

13623

13624 Men with a positive MRI (i.e. PI-RADS score of 3-5) will receive a MRI targeted biopsy  
13625 of the prostate (see Section 10.6). Men will complete an Immediate Post Biopsy  
13626 Questionnaire (Appendix 7) ideally completed and returned immediately after a  
13627 biopsy, before the subject leaves the department.

13628

13629 Subjects will be given a 30-day post-biopsy questionnaire to take home after biopsy  
13630 and complete as instructed on day 30 post-biopsy. This is to be returned by post or  
13631 at the 30 day follow up appointment (Visit 4). If Visit 4 is earlier than 30 days post  
13632 biopsy then this questionnaire can be given to the research team when 30 days is  
13633 finally complete. If Visit 4 is on or later than 30 days then this can be returned at the  
13634 Visit 4 appointment. As long as questionnaire is completed at 30-60 days post-  
13635 biopsy, it will be acceptable, however, the questionnaire should be completed as  
13636 close as possible to 30 days post-biopsy.

13637

13638 At the 30-days post biopsy interval, a member of the research team will call the  
13639 subject to remind them to complete and return the 30-day questionnaires.

13640 **11.4 Visit 3 (Biopsy): ARM B, for men randomized to a systematic**  
13641 **TRUS-biopsy**

13642 **For men randomized to ARM B only.**

13643

13644 Men will receive a standardized TRUS-guided biopsy(see Section 10.7.) Men will  
13645 complete an Immediate Post Biopsy Questionnaire (Appendix 7) ideally completed  
13646 and returned immediately after the biopsy.

13647 Subjects will be given a 30-day post-biopsy questionnaire to take home after biopsy  
13648 and it is to be completed as instructed on day 30 post-biopsy. This is to be returned  
13649 by post or at the 30 day follow up appointment (Visit 4). If Visit 4 is earlier than 30  
13650 days post biopsy then this questionnaire can be given to the research team when 30  
13651 days is reached. If Visit 4 is on or later than 30 days then this can be returned at the  
13652 Visit 4 appointment. As long as the questionnaire is completed at 30-60 days post-

---

13653 biopsy, it will be acceptable, however the questionnaire should be completed as  
13654 close as possible to 30 days post-biopsy.

13655

13656 At 30-days post biopsy a member of the research team will call the subject to remind  
13657 them to complete and return the 30-day questionnaires.

13658 **11.5 Visit 4 (Post-test follow up): ARM A, for men who did not receive a**  
13659 **biopsy**

13660 This appointment will include a follow up meeting with the investigator to discuss  
13661 the results of the MRI as well as treatment decisions. This follow up should occur  
13662 after the availability of the MRI report. At this visit the subject will also complete a  
13663 30-day post intervention EQ-5D-5L Questionnaire.

13664

13665 Subjects will complete a Post-MRI 30-day questionnaire (Appendix 8), which has been  
13666 posted to them by the research team. If Visit 4 is earlier than 30 days post MRI then  
13667 this questionnaire can be given to the research team when 30-days is finally  
13668 complete. If Visit 4 is on or later than 30 days then this can be returned at the Visit 4  
13669 appointment. As long as the questionnaire is completed at 30-60 days post-MRI, it  
13670 will be acceptable, however the questionnaire should be completed as close as  
13671 possible to 30 days post-MRI.

13672

13673 At 30-days post MRI, a member of the research team will call the subject to remind  
13674 them to complete the 30-day questionnaires.

13675 **11.6 Visit 4 (Post-test follow up): For all men who received a biopsy**

13676 This appointment will include a follow up meeting with the investigator to discuss  
13677 the results of the biopsy as well as treatment decisions. This should be completed as  
13678 soon as possible following the availability of any pathology results. The follow up  
13679 appointment should be within 1 month of the biopsy. Depending on local Urology  
13680 service structure, these results may need to be discussed at an MDT meeting to  
13681 inform treatment decision.

13682

13683 The research team should record the treatment decision in the subject file.

13684

13685 Possibilities for treatment decision include but are not limited to:

- 13686 • Further diagnostic test (e.g. PSA, biopsy, MRI)
- 13687 • Active Surveillance
- 13688 • Radical treatment (e.g. radical prostatectomy, radical radiotherapy)
- 13689 • Focal therapy (e.g. high intensity focused ultrasound, cryotherapy)
- 13690 • Hormone therapy

13691

13692 At this visit the subject will also receive a 30-day post intervention EQ-5D-5L  
13693 Questionnaire to complete. Subjects will also complete a 30-day Post Biopsy  
13694 questionnaire (Appendix 8), which has been posted to them by the research team.  
13695 The questionnaire needs to be completed on the 30<sup>th</sup> day post-intervention (i.e. post  
13696 biopsy). However it will be accepted if completed up to 72 hours prior to or after the

---

13697 30<sup>th</sup> day. A telephone reminder from the research team to the subject can take  
13698 place.  
13699

13700 **11.7 Visit 5 (6 month follow up):26 week follow up**

13701 All subjects will have a 26 week visit

13702 Subjects will have the following:

- 13703 • Vitals, DRE (not required, at discretion of PI)
- 13704 • PSA
- 13705 • Optional sample collection (blood)

13706 **11.8 Visit 6 (1 year follow up): 52 week follow up**

13707 All subjects are planned to have a 52 week follow up visit.

13708 Subjects will be followed to obtain the following information on an annual basis:

- 13709 • Vitals, DRE
- 13710 • time to cancer diagnosis;
- 13711 • Gleason score progression;
- 13712 • time to intervention on active surveillance;
- 13713 • time on active surveillance;
- 13714 • results of PSA tests.
- 13715 • Time to follow up biopsy and/or mpMRI if performed (see follow up  
13716 guidelines)
- 13717 • Indication for follow up biopsy
- 13718 • Was MRI performed prior to follow up biopsy
- 13719 • Was the biopsy systematic, targeted only or both systematic + targets, not  
13720 done because of negative MRI
- 13721 • Optional sample collection (blood, urine)

13722

13723 Those subjects randomized to ARM A but who did not have an MRI-targeted biopsy  
13724 will have an additional MRI at Visit 6 (year 2).

13725 **11.9 Visit 7 (18 month follow up): 78 week follow up**

13726 All subjects will have a 78 week visit

13727 Subjects will have the following:

- 13728 • Vitals, DRE (not required, at discretion of PI)
- 13729 • PSA
- 13730 • Optional sample collection (blood)

13731

13732 **11.10 Visit 8 (2 year follow up): End of study**

13733 All study participants will be followed for up to two years or until they undergo  
13734 radical treatment

13735 Subjects will be followed to obtain the following information on an annual basis:

- 13736 • Vitals, DRE
- 13737 • time to cancer diagnosis;
- 13738 • Gleason score progression;

- 
- 13739
- 13740
- 13741
- 13742
- 13743
- 13744
- 13745
- 13746
- 13747
- 13748
- 13749
- 13750
- 13751
- time to intervention on active surveillance;
  - time on active surveillance;
  - results of PSA tests.
  - Optional sample collection (blood, urine)
  - Time to follow up biopsy and/or mpMRI if performed (see follow up guidelines)
    - Indication for follow up biopsy
    - Was MRI performed prior to follow up biopsy
    - Was the biopsy systematic, targets only or both systematic + targets, not done because of negative mpMRI

13752 Follow-up will cease once treatment beyond active surveillance is undertaken  
13753 (prostatectomy, radiation therapy, focal therapy, etc.).

13754

13755 Those subjects randomized to ARM A but who did not have an MRI-targeted biopsy  
13756 will have an additional MRI at Visit 8.

13757

## 13758 **12. Randomization**

### 13759 **12.1 Randomization Procedure**

13760 Written informed consent will be obtained from all eligible subjects prior to  
13761 commencing any study related procedures. The Ontario Clinical Oncology Group  
13762 (OCOG) Coordinating and Methods Centre (CMC) located at the Research Centre,  
13763 Juravinski Hospital and Cancer Centre, Hamilton, Ontario will centrally coordinate  
13764 subject randomization. Subjects will be allocated to the two treatment arms in an  
13765 approximate 1:1 ratio by use of a dynamic allocation scheme[47].

13766

13767 After documentation of written informed consent and confirmation of subject  
13768 eligibility, clinical centres will randomize the subject by accessing the CMC's web-  
13769 based Interactive Registration/Randomization System (IRIS). Prior to randomization  
13770 and treatment allocation, the subjects' individualized risk of high-grade prostate  
13771 cancer, obtained using the PCPTRC 2.0 calculator found at  
13772 <http://deb.uthscsa.edu/URORiskCalc/Pages/calcs.jsp> must be determined.

### 13773 **12.2 Stratification**

13774 Eligible, consenting subjects will be stratified by: (1) individualized risk of high-grade  
13775 prostate cancer (5% to 25%, >25%); and (2) clinical centre

### 13776 **12.3 Blinding and measures taken to avoid bias**

13777 This study is unblinded, and all subjects will be aware of the treatment that they are  
13778 receiving. As the MRI scan is unique to one of the arms it will not be possible to blind  
13779 the participants or investigators as to what intervention is being received. Therefore,  
13780 participants will be informed which arm they have been allocated to. Where  
13781 possible, the data will be coded so as to blind individuals analyzing the data from  
13782 which of the groups the data was from. Summary details of randomized allocation

---

13783 and outcomes will not be made available (unless specifically authorized by the Trial  
13784 Steering Committee and/or Data Monitoring Committee) in order to maintain the  
13785 overall blind of the trial.

13786

13787 Radiologists will be blinded to subject information. (e.g. PSA level Radiologists will be  
13788 aware that the subject is part of the trial.

13789 Pathologists will be blinded to the cohort allocation. Concealment may be  
13790 challenging due to the different number of cores in the two groups, but this is  
13791 unavoidable. This is unlikely to represent a significant source of bias.

13792

13793

### 13794 **13. Data**

13795

13796 Type of data to be collected:

- 13797 • EQ-5D–5L questionnaires. These will measure quality of life and which will be  
13798 measured at specific times throughout the trial.
- 13799 • Systematic TRUS guided biopsy– pathology – categorical (e.g. Gleason grade) and  
13800 continuous data
- 13801 • MRI – diagram representing MRI; categorical data for areas and scores of  
13802 suspicion (e.g. Sector 1p, score of suspicion 4/5)
- 13803 • MRI-targeted biopsy – pathology – categorical (e.g. Gleason grade) and  
13804 continuous data
- 13805 • Post-biopsy immediate and 30-day questionnaires – categorical data (e.g. fevers  
13806 yes/no)
- 13807 • Treatment decisions – categorical data (e.g. radical treatment)
- 13808 • PSA – continuous data (e.g. value of PSA in ng/ml)

13809

13810 Please see **Appendix1** for the time window for data collection.

13811

### 13812 **14. Statistical Considerations**

#### 13813 **14.1 Sample Size Calculation**

##### 13814 **STATISTICAL methods**

##### 13815 **Primary Analysis**

13816 Absolute differences in the proportion of clinically significant cancer detected  
13817 between arms will be calculated and compared using the Clopper-Pearson method.  
13818 If the lower boundary of an one-sided, 97.5% confidence interval for the difference  
13819 in detection rates of MPMRI-TB compared to systematic TRUS guided biopsy is less  
13820 than -5% then MPMRI-TB will be deemed non-inferior. In the event that the lower  
13821 bound is greater than zero, superiority can be claimed.

13822

13823 A supportive analysis will be performed by using a logistic regression model,  
13824 evaluating the odds ratio for detecting high grade cancers, adjusted for stratification  
13825 factors. MRI-guided biopsy would be considered non-inferior if the lower bound of  
13826 the two-sided, 95% confidence interval for the odds ratio exceeds 0.78. This lower

---

13827 bound was calculated to approximate an absolute 5% difference of interest (NOTE:  
13828 the unadjusted odds ratio is 0.78 when treatment A is 30% and treatment B is 25%).  
13829

### 13830 **Secondary Analyses**

13831 For each secondary outcome, where appropriate, a difference in proportions with  
13832 95% CI, or a difference in means with 95% CI, as appropriate, will be presented.  
13833 Differences in the 1-year and 2-year rates along with 95% CI will be calculated for  
13834 time-to-event outcomes.

13835  
13836  $\chi^2$  tests, t-tests or Wilcoxon rank sum tests, and log-rank tests will be used to test for  
13837 differences between allocation arms in secondary outcomes. Logistic regression and  
13838 Cox proportional hazards regression will be used to examine the effect of allocation  
13839 arm on outcomes, adjusted for stratification factors. All secondary outcomes will be  
13840 two-sided and statistical significance will be set at the  $\alpha=0.05$  level. No statistical  
13841 adjustments will be made due to multiple testing, however, results for secondary  
13842 outcomes will be interpreted cautiously, acknowledging that tests were performed  
13843 on secondary outcomes and numerous secondary tests were performed. Figures and  
13844 tables will be used to illustrate results of interest.

13845

### 13846 **Treatment Allocation and Stratification**

13847 Subjects will be allocated to the two allocation arms in an approximate 1:1 ratio by  
13848 use of a dynamic allocation scheme. Specifically, the first 20 subjects will be  
13849 randomly allocated to arm in an approximate 1:1 ratio. After the first 20 subjects, a  
13850 biased coin method will be used, whereby the number of subjects within each  
13851 stratum will be calculated, and the next eligible subject will be allocated (with  
13852 probability  $p=0.8$ ) to the arm which reduces the imbalance. If no imbalance exists,  
13853 allocation to each arm will occur with probability  $p=0.5$ .

13854

#### 13855 Stratification

13856 For treatment allocation, the subjects' individualized risk of high-grade prostate  
13857 cancer will be determined. Risk will be assessed using the PCPTRC 2.0 calculator,  
13858 found at <http://deb.uthscsa.edu/URORiskCalc/Pages/calcs.jsp>. Eligible, consenting  
13859 subjects will be stratified by:

13860 (1) individualized risk of high-grade prostate cancer (5% to 25%, >25%);

13861 (2) clinical centre.

13862

### 13863 **Sample Size**

13864 Rates of clinically significant cancer (Gleason  $\geq 7$ ) detection from targeted-alone  
13865 biopsy in a population with no prior biopsy have been shown to be 42% [37] and  
13866 50% from another study [36].

13867

13868 Rates of clinically significant cancer detection from one the largest studies of  
13869 systematic TRUS guided biopsy in men without prior biopsy are shown to be 27%  
13870 [49]. Therefore, based on these results, it may be assumed that targeted-biopsy will  
13871 detect clinically significant cancer in >15% more men (i.e. 42% versus 27%) than  
13872 systematic TRUS guided biopsy.

13873



---

13874 For this study, it will be conservatively hypothesized that systematic TRUS guided  
13875 biopsy will detect clinically significant cancer in 30% of men, and targeted biopsy will  
13876 detect clinically significant cancer in 10% more men (i.e. 40% total) than systematic  
13877 TRUS guided biopsy. For the non-inferiority hypothesis, using 90% power and 2.5%  
13878 one sided-alpha, assuming a targeted biopsy detection rate of clinically significant  
13879 cancer of 40%, and a detection rate for systematic TRUS guided biopsy of 30% and  
13880 using a margin of clinical unimportance of 5%, 211 men per arm will be required. The  
13881 choice of 5% as the margin of non-inferiority represents a difference that would be  
13882 considered clinically important.

13883  
13884 Thus total men required in study = **422**.

13885  
13886 To account for potential withdrawal / loss to follow up and the effect of  
13887 stratification, the sample size will be inflated by 5%, and a target of **450 men** will be  
13888 recruited.

13889  
13890 Note that the rate of clinically significant cancers is very dependent on the  
13891 population registered for this study. It is possible that fewer (or more) subjects will  
13892 have clinically significant cancers than what is initially hypothesized. However, if the  
13893 population rate of clinically significant cancers is less (i.e. the systematic TRUS guided  
13894 biopsy detection rate is <30%) and other statistical assumptions remain as stated  
13895 previously, the statistical power will increase. The minimum statistical power would  
13896 be obtained if the clinically significant cancer detection rate was 45% for systematic  
13897 TRUS guided biopsy and 55% for targeted biopsy, which would still achieve >84%  
13898 power. Therefore, the sample size is sufficient to ensure non-inferiority, even if the  
13899 rate of clinically significant cancer in the population is miss-specified, assuming an  
13900 absolute difference of 10% between targeted and systematic TRUS guided  
13901 biopsy detection rates, and a 5% margin of non-inferiority.

13902  
13903 **Statistical Conventions**

13904 For categorical data, tables will be presented showing the n and percentage  
13905 (n/N\*100%) of subjects. Analyses will be presented by study allocation arm  
13906 separately.

13907  
13908 Duration of time will be described in either years, months or weeks, and calculated  
13909 using: (last date – first date + 1) / X, where X=365.25 for years, X=30.4 for months, or  
13910 X=7 for weeks. Example: Age (in years) will be calculated as: (randomization date –  
13911 date of birth + 1)/365.25.

13912  
13913 Transformations of the data in order to meet statistical assumptions may be  
13914 considered. Type-1 error will be set to 5%. Standard diagnostic tools will be used to  
13915 assess any of the model fittings. All the statistical analysis will be carried out using  
13916 SAS version-9 and over for Windows (Cary, NC) or R version 3.2.2. (www.r-  
13917 project.org) or higher.

13918  
13919 **Missing Data**

13920 Missing values for the primary endpoint will be examined closely. Sources and  
13921 reasons for the absence of data incurred as a result of subjects lost-to-follow up,

---

13922 dropouts, and intermittent missing values will be described and explored by various  
13923 summary statistics as well as graphical displays between the two allocation arms.  
13924 Subjects' lost-to-follow up or dropouts will be explored and the characteristics of  
13925 those subjects will be described by allocation arm and tested using Fisher's exact  
13926 tests or Wilcoxon rank sum tests.

13927  
13928 Missing data for secondary endpoints will be described. The methods for evaluating  
13929 missing data of the primary endpoint may be employed for endpoints of interest. For  
13930 summarization of baseline data, the following conventions will be used for partial  
13931 missing date information occurring prior to randomization (e.g. for medical history  
13932 or prior treatment). If year is missing, the date will be set at missing. If year is  
13933 available, but month and date is missing, the month and date will be set to July 1<sup>st</sup> of  
13934 the respective year. If date is missing, but year and month available, the day will be  
13935 set to the 15<sup>th</sup> of the respective month.

## 13936 **14.2 Interim Analyses**

13937  
13938 The Trial Steering Committee (TSC), Data Safety and Monitoring Committee (DSMC)  
13939 or Trial PI may recommend cessation of the trial or suggestion modifications to trial  
13940 conduct if there are concerns about subject safety or futility. Unless otherwise  
13941 specified by one of these bodies, a futility analysis will be performed after  
13942 approximately 200 subjects are enrolled and have their primary outcome  
13943 ascertained. Simulation will be used to estimate the conditional probability of futility  
13944 assuming the study was to continue to completion, and assuming the clinically  
13945 significant cancer detection rate is 30% in both arms. If the conditional probability is  
13946 0.95 or higher that continuation of the study will result in a negative result, the  
13947 DSMC will recommend a suspension of recruitment to the trial, and initiation of a  
13948 quality assurance review. A decision to permanently close the study or continue with  
13949 accrual will be determined by the Steering Committee, based on the results of the  
13950 quality assurance review, and the recommendation of the DSMC.

### 13951 13952 **Timing of Final Analysis**

13953 A single, final, analysis will occur after all subjects have undergone their initial biopsy  
13954 and all data related to the initial biopsy is documented and validated. Follow-up  
13955 analyses will be conducted after all subjects have completed two years of follow-up.

## 13956 **14.3 Populations:**

13957 The per protocol, study population will consist of all subjects who satisfy all eligibility  
13958 criteria and are randomized to the study, who undergo MPMRI-TB or systematic  
13959 TRUS guided biopsy and have their primary outcome measured. This population will  
13960 be used for the primary analysis of non-inferiority.

13961 The intent-to-treat (ITT) population will consist of all subjects randomized to the  
13962 study, regardless of any protocol violations or if they do not complete the study as  
13963 defined in the protocol. The ITT population will be used as a supportive analysis of  
13964 the primary analysis, for all safety analyses, and for any analysis investigating  
13965 superiority.

---

13966 **14.4 Primary Outcome**

13967 **14.4.1 Detection rate of clinically significant cancer**

13968 The proportion of men in each arm with clinically significant cancer (Gleason  $\geq 7$ ) will  
13969 be calculated based on histology results from biopsy procedures. Analysis will be on  
13970 the intention to treat population.

13971

13972 Absolute differences in proportion of clinically significant cancer detected between  
13973 arms will be calculated and compared. If the lower boundary of the 97.5%  
13974 confidence interval for the difference in detection rates of MPMRI-TB compared to  
13975 systematic TRUS guided biopsy is less than -5% then MPMRI-TB will be deemed non-  
13976 inferior. In the event that the lower bound is greater than zero, superiority can be  
13977 claimed.

13978

13979 The primary analysis will be conducted once all subjects have completed visit 4,  
13980 when the results of the biopsy or MRI are given to the subject.

13981

13982 **14.5 Secondary Outcomes**

13983 For each secondary outcome, where appropriate, a difference in proportions with  
13984 95% CI, or a difference in means with 95% CI, as appropriate, will be presented.

13985

13986 **14.5.1 Proportion of men in each arm with clinically insignificant  
13987 cancer detected**

13988 The proportion of men in each arm with clinically insignificant cancer (Gleason  $< 7$ )  
13989 will be calculated based on histology results from biopsy procedures. In addition, the  
13990 numbers with clinically insignificant cancer identified by MRI alone will also be  
13991 included.

13992

13993 **14.5.2 Proportion of men in each arm with Gleason  $\geq 4 + 3$  detected**

13994 The proportion of men in each arm with Gleason  $\geq 4 + 3$  will be calculated based on  
13995 histology results from biopsy procedures. In addition, the numbers with clinically  
13996 insignificant cancer identified by MRI alone will also be included.

13997

13998 **14.5.3 Proportion of men in MPMRI arm who avoid biopsy.**

13999

14000 **14.5.4 Proportion of men in the MRI arm whom the PI-RADS score for  
14001 suspicion of clinically significant cancer was 3, 4 or 5 but no clinically  
14002 significant cancer was detected.**

14003 The proportion of men in each arm whom the PI-RADS score for suspicion of  
14004 clinically significant cancer was 3, 4 or 5 but no clinically significant cancer was  
14005 detected, will be calculated based on histology results from biopsy procedures.

14006

14007 **14.5.5 Proportion of men in each arm who go on to definitive local  
14008 treatment (e.g. radical prostatectomy, radiotherapy, brachytherapy) or  
14009 systemic treatment (e.g. hormone therapy, chemotherapy)**

14010  
14011  
14012  
14013  
14014  
14015  
14016  
14017  
14018  
14019  
14020  
14021  
14022  
14023  
14024  
14025  
14026  
14027  
14028  
14029  
14030  
14031  
14032  
14033  
14034  
14035  
14036  
14037  
14038  
14039  
14040  
14041  
14042  
14043  
14044  
14045  
14046  
14047  
14048  
14049  
14050  
14051  
14052  
14053  
14054  
14055

---

#### **14.5.8 Proportion of men with a negative MRI who progress within 24 months after their study MRI, or who are upgraded within 24 months**

Men with a negative MRI who do not undergo a biopsy will have a follow-up MRI 2 years after their study MRI. We will determine the proportion of men whose subsequent MRI shows a PI-RADS 3 or greater lesion. The results of targeted biopsy of those lesions will be recorded and analyzed. The number of men who are upgraded to Gleason  $\geq 7$  due to an off-protocol biopsy will also be recorded.

#### **14.5.9 Proportion of men with post-biopsy adverse events**

Immediate post-biopsy discomfort and pain will be characterized by intensity using the numerical analogue score. Scores for each arm will be compared. 30-day biopsy specific complications and adverse events will be characterized according to their presence, absence, duration and how much of a problem the symptoms caused the subject. Whether the subject had contact with health care providers/system will also be recorded. The proportion of individuals experiencing each symptom, proportion in whom that symptom caused a problem and proportion who had contact with healthcare providers/system will be calculated and compared qualitatively between arms utilizing classification systems validated in previous studies [39]. The biopsy specific complications that will be compared include pain, urinary retention, fever, pain, erectile dysfunction, urinary incontinence, haematuria, haematochezia and haematospermia.

Any post-biopsy complications up to 30-days post biopsy procedure will be tabulated and listed by duration and management.

#### **14.5.10 Health related quality of life**

EQ-5D-5L descriptive domain summary indices and visual analogue scores will be assessed at baseline, at 2 years and changes will be compared between arms.

EQ-5D was selected as a simple, low burden quality of life instrument that will provide validated information on symptoms, particularly anxiety, that could be compared across disease states and studies. Other subject-reported outcomes directly linked to the interventions will be captured in the post-biopsy surveys. Since it provides utilities, these will be incorporated into a secondary economic analysis if the results permit.

#### **14.5.11 Proportion Gleason score upgrading in men undergoing radical prostatectomy**

Of the men who undergo radical prostatectomy, the proportion who have cancer upgraded from the biopsy histopathology to the radical prostatectomy histopathology in each arm will be calculated and compared.

#### **14.5.12 Cost Outcomes**

---

14056 As the study design for clinical outcomes is one of non-inferiority, the primary  
14057 economic analysis will be **cost minimization analysis**. The perspective of the  
14058 economic analysis will be that of the public payer. The primary goal of the analysis  
14059 will be to support arguments for public funding. Thus the costs of participant  
14060 burden, logistical challenges, and expense of obtaining societal costs, will not be  
14061 evaluated.

14062

#### 14063 **14.5.12.1 Data collection:**

14064 As part of the informed consent process, participants in Ontario will also  
14065 consent to having their Ontario Health Insurance Number recorded, to be  
14066 later transferred to the Institute for Clinical Evaluative Sciences (ICES) where  
14067 it will be linked to a number of administrative claims databases recording  
14068 health system resource utilization such as physician billing [Ontario Health  
14069 Insurance Plan (OHIP); laboratory and diagnostic tests (OHIP); hospitalization  
14070 and surgery [Discharge AbstractDatabase (DAD)]; medications [Ontario Drug  
14071 Benefit (ODB) Formulary, New Drug Funding Program (NDFP), and Activity  
14072 Level Reporting (ALR)]; clinic and emergency department visits [National  
14073 Ambulatory Care Reporting System (NACRS), Emergency Department visits];  
14074 radiation (ALR); homecare (Home Care databases) and a few additional ones  
14075 as determined necessary (e.g., Long-term care, Mental Health, Diabetes. The  
14076 overall, number and proportion of health system resources will be  
14077 determined. In this way we can capture comprehensive resource utilization  
14078 related to on-trial management including any adverse events.

#### 14079 **14.5.12.2 Health Insurance number handling and security**

14080 As the economic implications of this study are of prime importance to some  
14081 of the funders, the request for data linkage will be part of the main consent  
14082 form. If a participant indicates to the study team that they decline or  
14083 withdraw consent, the OHIP number will be recorded as 9999-999-999-XX.  
14084 The OHIP numbers will stay with the participating institution until after  
14085 accrual is complete, and then they will all be transferred at one time under  
14086 data sharing agreements between ICES and each institution. Data will be  
14087 transferred using a secure electronic file transfer system established by ICES  
14088 and managed by authorized ICES personnel responsible for receiving  
14089 data. The file transfer system uses security safeguards including encryption  
14090 and authentication.

14091

14092 ICES is a Prescribed Entity under the Personal Health Information Protection  
14093 Act (PHIPA), and can receive and use personal health information for  
14094 purposes of analysis and compiling statistical information and other research.  
14095 Its policies and procedures for privacy protection and data security have been  
14096 approved by Ontario's Privacy Commissioner. ICES is a secure facility, video-  
14097 monitored and requiring passkeys to access private offices and  
14098 computers. ICES has extensive experience in the protection of confidentiality  
14099 when using such data. It has a UNIX-based network that cannot be accessed  
14100 externally. ICES data facilities are fully 'moated' (no connections to other  
14101 computers). At ICES, routine procedures for data backup are instituted by a  
14102 data management team. The data is burned onto a CD or placed on an

---

14103 external hard drive and placed in a locked vault. All ICES staff and scientific  
14104 affiliates are required to sign agreements of confidentiality annually. Internal  
14105 audits are conducted to monitor compliance with ICES policies, standards and  
14106 procedures.

14107  
14108 Study data with direct personal identifiers such as OHIP numbers will  
14109 reside on a dedicated and secure server at ICES and will only be  
14110 accessible by a named Data Covenantor. The Covenantor will encode  
14111 the OHIP number, replacing it with an ICES key number (IKN) (a code)  
14112 and transferring it to a “moated” server for the study project. (The  
14113 Data Covenantor is an ICES person named in our data sharing  
14114 agreements and identified to the Office of the Information and  
14115 Privacy Commissioner, who can access personal health information at  
14116 ICES for the purposes of receiving, coding, transferring or destroying  
14117 personal health information.) The coded study data will only be made  
14118 available to the Principal Investigator and project staff directly  
14119 responsible for data analysis (under the supervision of the  
14120 investigator). No subject, physician or institution will be identified in  
14121 the reporting of results  
14122

#### 14123 **14.5.12.3 Cost calculation**

14124 Once the utilization of health services is determined from those cases linked  
14125 to administrative databases, publicly available costs (2016\$CAN) will be  
14126 applied to health services. Costs for physician and laboratory services will be  
14127 determined by applying that year’s fee code. Costs for hospital care will be  
14128 estimated using the Canadian Institute for Health Information (CIHI) Resource  
14129 Intensity Weight method for the most recently available year. Outpatient  
14130 prescription drug costs for participants not covered by ODB (those under age  
14131 65 and not on social assistance) will be considered to be the same as the trial  
14132 arm-specific average for those with coverage. Costs will then be inflated  
14133 using the healthcare-specific Consumer Price Index reported by Statistics  
14134 Canada into constant Canadian dollars for the year the study ends. Due to the  
14135 short time horizon, discounting will not be applied.

#### 14136 **14.5.12.4 Primary Analysis**

14137 A within-trial analysis will be conducted to calculate the total cost for each  
14138 arm and mean cost per subject for each arm. Frequency distributions and  
14139 measures of central tendency (e.g. means and medians) will be determined  
14140 for each resource category (e.g. hospitalizations)for each arm of the study.  
14141 Confidence intervals for the difference in costs and resource utilization  
14142 between the strategies overall and for each resource category will also be  
14143 calculated. Univariate comparisons between the groups will be made  
14144 primarily using nonparametric tests, such as Wilcoxon rank-sum test. In the  
14145 primary analysis, assuming equivalence in the primary outcome, an arm with  
14146 significantly lower mean costs will be considered the economically most  
14147 attractive approach.  
14148

---

14149 Should the clinical trial find a difference between the two arms on the  
14150 primary endpoint, an incremental cost-benefit analysis will be calculated by  
14151 deriving the additional cost per case of clinically significant cancer diagnosed,  
14152 according to the following equation:

$$\text{Cost-benefit} = \frac{\text{Cost}_{(\text{Arm A})} - \text{Cost}_{(\text{Arm B})}}{\text{Diagnoses}_{(\text{Arm A})} - \text{Diagnoses}_{(\text{Arm B})}}$$

14153 The cost of avoiding each additional case of clinically insignificant cancer  
14154 diagnosed may also be similarly calculated. Consideration will be given to  
14155 extending this analysis using economic modeling with incorporation of utility  
14156 values from the EQ-5D to allow a lifetime perspective to be taken and the  
14157 estimation of quality adjusted life years (QALYs).

#### 14158 **14.5.12.5 Secondary Cost Analyses**

14159 One and multi-way sensitivity analyses will be carried out around major cost  
14160 drivers by varying the costs over their observed ranges and conducting  
14161 threshold analyses where appropriate. Sensitivity analyses will also be  
14162 performed to evaluate potential limitations in the data, such as ODB costs as  
14163 described above (though the proportion without ODB coverage should be  
14164 similar in the two arms, and it is not expected to be a major cost-driver).

14165  
14166  
14167

#### 14168 **14.5.13 Missing Data**

14169 The impact of missing data will be explored in all analyses; sensitivity  
14170 analyses/multiple imputation will be performed as appropriate.

14171

### 14172 **15. Participant compliance and withdrawal**

14173

14174 The study will be completed when at least 422 subjects have been randomized, have  
14175 undergone a diagnostic test and completed follow up. Compliance to randomized  
14176 treatment will be assessed by monitoring the completed forms, e.g. the systematic  
14177 TRUS guided biopsy form or the MRI-targeted biopsy form.

14178

14179 In consenting to the study, subjects are consenting to study monitoring, imaging and  
14180 biopsy procedures, follow-up, data collection and analysis. Subjects are allowed to  
14181 withdraw consent at any stage and their care will not be affected in any way. All  
14182 communication surrounding the withdrawal and its reasons should be noted in the  
14183 subject's record. Such cases should be reported to the PRECISE Study Operations  
14184 Office. Data up to the time of withdrawal can be included in the study.

14185

14186 As the study diagnostic tests are for suspected cancer it is not anticipated that there  
14187 will be significant loss to follow up.

14188

---

14189 **15.1 Subject Withdrawal from Study**

14190 A subject may discontinue participation in this study at any time at the investigator's  
14191 discretion or at the request of the subject.

14192

14193 If a subject discontinues at or before Visit 1 (randomization), he is not required to  
14194 complete end of study assessments.

14195

14196 If a subject discontinues after Visit 1 (randomization) for any reason, the investigator  
14197 should make every effort to complete the activities bulleted below.

14198

14199 • End of study assessments as outlined in **Section 10.14**.

14200 • Any occurrence of death, prostatic surgical intervention, non-surgical treatment  
14201 for prostate cancer after study withdrawal should be documented in the CRF and  
14202 source documents.

14203

14204 Subjects who are discontinued from the study after randomization will not be  
14205 replaced. Subjects withdrawn from the study retain their subject number if already  
14206 given. New subjects will be allocated a new subject number.

14207

14208 In the event that a subject is prematurely discontinued from the study at any time  
14209 due to an AE, the procedures describe in **Section 16.3** must be followed.

14210

14211 Subjects should be withdrawn from the study for any of the following criteria:

14212 • Non-compliance with the requirements of the study.

14213 • Request to discontinue treatment. This request can be made by either the  
14214 subject or the investigator.

14215 • Develops progressive disease.

14216

14217 **15.2 Study completion**

14218 The primary end point will be reached when the last subject entered has their  
14219 systematic biopsy or MRI and targeted biopsy if indicated. All subjects will be  
14220 followed for up to 2 years following study entry or until they have radical treatment.

14221 Subjects who are found to have significant prostate cancer and are treated will not  
14222 be included in follow up for this period. This includes subjects diagnosed as part of  
14223 study protocol, and subjects diagnosed during the follow up period by standard-of-  
14224 care procedures. However, post MRI/biopsy questionnaires will not be required  
14225 following non-protocol based procedures.

14226

14227 **16. Data Monitoring, Quality Control and Safety**

14228 **16.1 Stopping / discontinuation rules**

14229 The study will be completed when 450 participants have been randomized,  
14230 undergone a diagnostic test and completed follow up.

14231



---

14232 The Trial Steering Committee (TSC), Data Safety and Monitoring Committee (DSMC)  
14233 or Trial PI may recommend cessation of the trial or suggestion modifications to trial  
14234 conduct if there are concerns about subject safety or futility. See Section 14.2.1 for  
14235 further details on the interim analysis. Appropriate documentation as per the PI's  
14236 requirement will be completed if stopping the trial is necessary and the ethics  
14237 committee will be informed.

14238

14239 As the study is unblinded there will be no need for randomization code breaks.

14240

## 14241 **16.2 Monitoring, quality control and assurance**

14242

14243 Members of the trial team will be Good Clinical Practice (or equivalent) trained.

14244

14245 An independent DSMC will be appointed to monitor subject safety and the rate of  
14246 recruitment of subjects in the study. They will meet at least once a year whilst the  
14247 trial is ongoing for routine review of safety data and trial progression. They have the  
14248 power to call additional meetings and review data at any point in the trial should  
14249 they wish to do so.

14250

14251 The PI may also arrange an independent trial monitor to review the study data.

## 14252 **16.3 Assessment of safety**

14253 The investigator is responsible for the detection and documentation of events  
14254 meeting the criteria and definition of an AE or SAE as provided in this protocol.

14255 During this study, when there is a safety evaluation, the investigator or site staff will  
14256 be responsible for detecting AEs and SAEs, as detailed in this section of the protocol.

### 14257 **16.3.1 Definition of an Adverse Event (AE)**

14258 Adverse events (AE) will be defined as "any untoward medical occurrence in a  
14259 clinical trial subject undergoing any intervention in the trial, which does not  
14260 necessarily have a causal relationship with this treatment".

14261

14262 Only adverse events specific to biopsy-related complications including pain, fever,  
14263 hematuria, hematochezia, hematospermia, urinary retention and urinary  
14264 incontinence will be recorded. Any other adverse events will not be recorded. Please  
14265 refer to section 16.3.6 of the protocol.

### 14266 **16.3.2 Definition of a Serious Adverse Event (SAE)**

14267 Serious adverse events (SAE) will be defined as "any untoward medical occurrence as  
14268 a result of any intervention in the trial that:

14269 **(a) results in death**

14270 **(b) is life-threatening**

14271 The term 'life-threatening' in the definition of 'serious' refers to an event in which  
14272 the subject was at risk of death at the time of the event. It does not refer to an  
14273 event, which hypothetically might have caused death, if it were more severe.

14274 **(c) requires hospitalisation or prolongation of existing hospitalisation**

---

14275 In general, hospitalization signifies that the subject has been detained (usually  
14276 involving at least an overnight stay) at a hospital or emergency ward for observation  
14277 and/or treatment that would not have been appropriate in the physicians' office or  
14278 outpatient setting. Complications that occur during hospitalization are AEs. If a  
14279 complication prolongs hospitalization or fulfils any other serious criteria, the event is  
14280 serious. When in doubt as to whether 'hospitalization'; occurred or was necessary,  
14281 the AE should be considered serious. Hospitalization for elective treatment of a pre-  
14282 existing condition that did not worsen form baseline is not considered an AE.

14283 **(d) results in disability / incapacity**

14284 The term disability means substantial disruption of a person's ability to conduct  
14285 normal life functions. This definition is not intended to include experiences of  
14286 relatively minor medical significance such as uncomplicated headache, nausea,  
14287 vomiting, diarrhea, influenza and accidental trauma (e.g. sprained ankle) which may  
14288 interfere or prevent everyday life functions but do not constitute a substantial  
14289 disruption.

14290 **(e) is a congenital abnormality/birth defect.**

14291 Medical or scientific judgement should be exercised in deciding whether reporting is  
14292 appropriate in other situations, such as important medical events that may not be  
14293 immediately life threatening or result in death or hospitalization but may jeopardise  
14294 the subject or may require medical or surgical intervention to prevent one of the  
14295 outcomes listed in the above definition. These should also be considered serious.  
14296 Examples of such events are invasive or malignant cancers, intensive treatment in an  
14297 emergency room or at home for allergic bronchospasm, blood dyscrasias or  
14298 convulsions that do not result in hospitalization, or development of drug  
14299 dependence or drug abuse.

14300 **16.3.3 Disease-Related Events or Outcomes Not Qualifying as SAEs**

14301 An event which is part of the natural course of the disease under study (i.e., disease  
14302 progression) does not need to be reported as a serious adverse event. Progression of  
14303 the subject's neoplasia will be recorded in the clinical assessments in the CRF. Death  
14304 due to progressive disease is to be recorded on 'Record of Death' CRF page and not  
14305 as an SAE. However, if the progression of the underlying disease is greater than that  
14306 which would normally be expected for the subject, or if the investigator considers  
14307 that there was a causal relationship between treatment with study medication or  
14308 protocol design/procedures and the disease progression, then this must be reported  
14309 as an SAE. Any new primary cancer must be reported as an SAE.

14310 **16.3.4 Lack of Efficacy**

14311 "Lack of efficacy" will not be reported as an AE. The signs and symptoms or clinical  
14312 sequelae resulting from lack of efficacy will be reported if they fulfill the AE or SAE  
14313 definition (including clarifications).

14314 **16.3.5 Clinical Laboratory Abnormalities and Other Abnormal  
14315 Assessments as AEs and SAEs**

14316 Abnormal laboratory findings or other abnormal assessments that are judged by the  
14317 investigator as **clinically significant** (CS) will be recorded as AEs or SAEs if they meet  
14318 the definition of an AE or SAE. Clinically significant abnormal laboratory findings or

---

14319 other abnormal assessments that are detected during the study or are present at  
14320 baseline and significantly worsen following the start of the study will be reported as  
14321 AEs or SAEs. However, clinically significant abnormal findings or other abnormal  
14322 assessments that are associated with the disease being studied, unless judged by the  
14323 investigator as more severe than expected for the subject's condition or that are  
14324 present or detected at the start of the study and do not worsen, will not be reported  
14325 as AEs or SAEs.

14326

14327 The trial interventions are routinely carried out in clinical practice for investigation of  
14328 suspected cancer and the risks of the interventions are therefore not any greater  
14329 than if a man was not part of the trial. The risks of the procedures are relatively low,  
14330 as detailed in Section 11.

14331

14332 The investigator will exercise his or her medical and scientific judgment in deciding  
14333 whether an abnormal laboratory finding or other abnormal assessment is clinically  
14334 significant.

### 14335 **16.3.6 Recording/Reporting AEs and SAEs**

14336 The AE reporting period for this study begins at randomization and  
14337 will be recorded until 30-days post-biopsy. In the event that the subject does not  
14338 undergo biopsy, AEs and SAEs should be recorded until 30-days post MRI.

14339

14340 Only adverse events specific to biopsy-related complications including pain, fever,  
14341 hematuria, hematochezia, hematospermia, urinary retention and urinary  
14342 incontinence will be recorded. Any other adverse events will not be recorded.

14343

14344 AEs will be recorded by a member of the research team or clinical team on an AE  
14345 report form. All SAEs must be recorded on a SAE report form. SAE report forms  
14346 should be sent to the CTG who will keep a log of AEs and SAEs. AE and SAE logs will  
14347 be reviewed by the DSMC.

14348

14349 For the purposes of this study, only those AEs deemed POSSIBLY, PROBABLY, or  
14350 DEFINITELY related to the study procedures (ie, MRI or biopsy), or meets the criteria  
14351 as a SAE, will be collected and reported.

14352

14353 Expected AEs includes the following:

14354

- Pain
- Blood in the urine
- Blood in the semen
- Blood in the stool or back passage
- Erectile dysfunction
- Urinary incontinence
- Urinary tract infection
- Fevers

14355

14356

14357

14358

14359

14360

14361

14362

14363 In addition, small risks of allergic reactions are associated with the intravenous  
14364 administration of gadolinium, the contrast agent used in MRI scans, as described in

---

14365 section 10.18.1.2. This contrast agent is used consistently in MRI scanning and is not  
14366 limited to this trial.  
14367  
14368 If any of these symptoms are accompanied by events consistent with the definition  
14369 of an SAE as specified above, then the event will be considered an SAE.  
14370  
14371 The Trial Coordinator, Principal Investigator or Chief Investigator should be informed  
14372 of any SAE within 24 hours.  
14373 All SAE report forms must be completed and the SAE logs updated. All SAEs must be  
14374 followed up until a resolution is reached (i.e. recovered, recovering, recovered with  
14375 sequelae, fatal, not recovered or unknown).  
14376  
14377 Local sites may have specific institutional protocols for reporting SAEs, which should  
14378 be followed in addition.  
14379  
14380 When an AE/SAE occurs, it is the responsibility of the investigator to review all  
14381 documentation relative to the event. The investigator will then record all relevant  
14382 information regarding an AE/SAE on the CRF.  
14383  
14384 The investigator will attempt to establish a diagnosis of the event based on signs,  
14385 symptoms and/or other clinical information. In such cases, the diagnosis should be  
14386 documented as the AE/SAE and not the individual signs/symptoms.

### 14387 **16.3.7 Evaluating AEs and SAEs**

#### 14388 **16.3.7.1 Assessment of Intensity**

14389  
14390 The investigator will make an assessment of intensity for each AE and SAE reported  
14391 during the study. Degree of severity and change in severity will be recorded by  
14392 means of National Cancer Institute, Common Terminology Criteria for Adverse  
14393 Events (NCI CTCAE), version 4.03.  
14394  
14395 If the event is not listed in the NCI CTCAE (v.4.03), the assessment will be based on  
14396 the investigator's clinical judgment. The intensity of each AE and SAE recorded in the  
14397 CRF should be assigned to one of the following categories:  
14398  
14399 **Mild:** An event that is easily tolerated by the subject, causing minimal discomfort  
14400 and not interfering with everyday activities.  
14401 **Moderate:** An event that is sufficiently discomforting to interfere with normal  
14402 everyday activities.  
14403 **Severe:** An event that prevents normal everyday activities.  
14404  
14405 An event that is classified as severe should not be confused with a SAE. Severity is a  
14406 category utilized for rating the intensity of an event; both AEs and SAEs can be  
14407 assessed as severe.

---

14408 **16.3.7.2 Assessment of Causality**

14409 The investigator is obligated to assess the relationship between investigational  
14410 product and the occurrence of each AE/SAE. The investigator will use clinical  
14411 judgment to determine the relationship. Alternative causes and the temporal  
14412 relationship of the event to the investigational product will be considered and  
14413 investigated. The investigator will also consult the CIB and or Product Information,  
14414 for marketed products, in the determination of his/her assessment.

14415 **16.3.8 Follow-up of AEs and SAEs**

14416 After the initial AE/SAE report, the investigator is required to proactively follow each  
14417 subject and provide further information to the PI of the study, on the subject's  
14418 condition.

14419  
14420 All AEs and SAEs documented at a previous visit/contact and are ongoing, will be  
14421 reviewed at subsequent visits/contacts.

14422  
14423 All AEs and SAEs will be followed until resolution, until the condition stabilizes, until  
14424 the event is otherwise explained or until the subject is lost to follow-up. Once  
14425 resolved, the appropriate AE/SAE CRF page(s) will be updated. The investigator will  
14426 ensure that follow-up includes any supplemental investigations as may be indicated  
14427 to elucidate the nature and/or causality of the AE or SAE.

14428  
14429 The PI may request that the investigator perform or arrange for the conduct of  
14430 supplemental measurements and/or evaluations to elucidate as fully as possible the  
14431 nature and/or causality of the AE or SAE. The investigator is obligated to assist. If a  
14432 subject dies during participation in the study or during a recognized follow-up  
14433 period, the PI will be provided with any post-mortem findings.

14434  
14435 New or updated information will be recorded on the originally completed SAE CRF,  
14436 with all changes signed and dated by the investigator or designate. The updated SAE  
14437 CRF should be resent to the PI.

14438 **16.3.9 Prompt Reporting of SAEs**

14439 Once the investigator determines that an event meets the protocol definition of an  
14440 SAE, the SAE will be reported to the PI (CURC) within 24 hours.

14441

14442 **16.3.9.1 Responsibility for Reporting Serious Adverse Events to PI**

14443 The Site Investigator must immediately inform the PI (CURC) of all SAEs (within 24  
14444 hours) at the following fax number: 1-416-480-6121.

14445

14446 The PI contact list for SAE receipt, fax numbers, telephone numbers and mailing  
14447 addresses is as follows:

14448 Dr. Laurence Klotz

14449 c/o Marlene Kebabdjian

14450 Sunnybrook Health Sciences Centre

14451 2075 Bayview Avenue A304

---

14452 Toronto, Ontario M4N 3M5 Canada  
14453 Phone: (416) 480-6100 ext 2890  
14454 E-mail: [Laurence.Klotz@sunnybrook.ca](mailto:Laurence.Klotz@sunnybrook.ca)  
14455 [Marlene.kebabdjian@sunnybrook.ca](mailto:Marlene.kebabdjian@sunnybrook.ca)

### 14456 **16.3.9.2 Completion and Transmission of the SAE Reports**

14457 Once an investigator becomes aware that an SAE has occurred in a study subject,  
14458 she/he will report the information to the PI within 24 hours. The SAE CRF will always  
14459 be completed as thoroughly as possible with all available details of the event, signed  
14460 by the investigator (or designee), and forwarded to the PI within the designated time  
14461 frames. If the investigator does not have all information regarding as SAE, he/she will  
14462 not wait to receive additional information before notifying the PI of the event and  
14463 completing the form. The form will be updated when additional information is  
14464 received.

14465  
14466 The investigator will always provide an assessment of causality at the time of the  
14467 initial report as described in Section 16.3.6.2.

### 14468 **16.3.10 Post-study AEs and SAEs**

14469 If the investigator learns of any SAE at any time after a subject has been discharged  
14470 from the study, and such event(s) is (are) reasonably related to the study  
14471 intervention, the investigator should promptly notify the PI (CURC).  
14472

## 14473 **17. Study Administration**

### 14474 **17.1 Regulatory and Ethical Considerations**

14475 An important consideration is that men are being randomized to one of two biopsy  
14476 techniques when it is not known which will be more effective in diagnosing clinically  
14477 significant prostate cancer. Both diagnostic tests are currently used in everyday  
14478 clinical practice at the institutions involved in the trial. Though systematic TRUS  
14479 guided biopsy could be considered standard of care, there is enough evidence to  
14480 support the concept that MPMRI-targeted biopsy may be as effective, if not more so,  
14481 than systematic TRUS guided biopsy[27]. This study aims to confirm this.

#### 14482 **17.1.1 Ethical Conduct of the Study and Ethics Approval**

14483 The PI and each participating site will obtain approval to conduct the study from the  
14484 Research Ethics Board (REB) prior to initiating the study.

14485  
14486 Participating sites from Ontario will use the Ontario Cancer Research Ethics Board  
14487 (OCREB) as their Board of Record.

14488 This study will be conducted in accordance with 'good clinical practice' (GCP) and all  
14489 applicable regulatory requirements, including where applicable, the 2013 version of  
14490 the Declaration of Helsinki.

14491  
14492 The investigator is responsible for ensuring that this protocol, the site's informed  
14493 consent form and any other information that will be present to potential subjects  
14494 are reviewed and approved by the appropriate REB. The investigator agrees to allow

---

14495 the REB direct access to all relevant regulatory documents. The PI will provide the  
14496 site investigator(s) with relevant document(s)/data that are needed for REB review  
14497 and approval of the study. Before CRFs can be shipped to the site, the PI must  
14498 receive copies of the REB approval, the approved informed consent form and any  
14499 other information that the REB has approved for presentation to potential subjects.

14500  
14501 If the protocol, the informed consent form or any other information that the REB has  
14502 approved for presentation to potential subjects is amended during the study, the  
14503 site investigator(s) is responsible for ensuring the REB reviews and approves, where  
14504 applicable, these amended documents. The site investigator(s) must follow all  
14505 applicable regulatory requirements pertaining to the use of an amended informed  
14506 consent form including obtaining the REB approval of the amended form before new  
14507 subjects consent to take part in the study using this version of the form. Copies of  
14508 the REB approval of the amended informed consent form/other information and the  
14509 approved amended informed consent form/other information must be forwarded to  
14510 the PI promptly.

### 14511 **17.1.2 Informed Consent**

14512 Informed consent will be obtained before the subject can participate in the study.  
14513 The contents and process of obtaining informed consent will be in accordance with  
14514 all applicable regulatory requirements.

14515  
14516 The subject's consent to participate in the study should be obtained after a full  
14517 explanation has been provided of the procedures to be given. Subjects should be  
14518 given sufficient time (at least 24 hours) after being given the study subject  
14519 information sheet to consider and discuss participation in the study with family and  
14520 friends.

14521  
14522 A contact number will be given to the subject should he wish to discuss any aspect of  
14523 the study. Following this, the clinician will determine that the subject is fully  
14524 informed of the study and their participation, in accordance with Good Clinical  
14525 Practice Guidelines. Subjects will always be asked to sign a consent form. One copy  
14526 will be given to the subject, one copy will be kept with subject's hospital notes and  
14527 one copy should be kept in the local investigator's file.

### 14528 **17.1.3 Investigator Reporting Requirements**

14529 The investigator is responsible for reporting SAEs to the REB in accordance with all  
14530 applicable regulations. Furthermore, the investigator may be required to provide  
14531 periodic safety updates on the conduct of the study at his or her site and notification  
14532 of study closure to the REB.

### 14533 **17.2 Study Monitoring**

14534 This study will be monitored by a CRA. The CRA will contact the sites by telephone  
14535 on a predetermined basis and would conduct a monitoring visits based on the data  
14536 entered in the EDC and queries.

14537  
14538 During these contacts, the monitor will:

- 
- 14539 • Check the progress of the study
  - 14540 • Review study data collected
  - 14541 • Conduct source document verification
  - 14542 • Identify any issues and address their resolution

14543

14544 This will be done in order to verify that the:

- 14545 • Data are authentic, accurate and complete
- 14546 • Safety and rights of subjects are being protected
- 14547 • Study is conducted in accordance with the currently approved protocol (and
- 14548 any amendments), GCP and all applicable regulatory requirements

14549

14550 The investigator agrees to allow CRA personnel direct access to all relevant  
14551 documents and to allocate his/her time and the time of his/her staff to CRA  
14552 personnel to discuss findings and any relevant issues.

### 14553 **17.3 Quality Assurance**

14554 To ensure compliance with GCP and all applicable regulatory requirements,  
14555 regulatory agencies may conduct a regulatory inspection of the study. Such  
14556 audits/inspections can occur at any time during or after completion of the study. If  
14557 an audit or inspection occurs, the investigator and institution agree to allow the  
14558 auditor/inspector direct access to all relevant documents and to allocate his/her  
14559 time and the time of his/her staff to the auditor/inspector to discuss findings and  
14560 any relevant issues.

### 14561 **17.4 Study and Site Closure**

14562 Upon completion of the study, the site investigator(s) will conduct the following  
14563 activities:

- 14564 • Return of all study data to the Sponsor (CURC)
- 14565 • Submission of all study data and data queries to OCOG
- 14566 • Review of site study records for completeness

14567

14568 In addition, the Principal Investigator has the right to temporarily suspend or  
14569 prematurely discontinue this study either at a single site or at all sites at any time for  
14570 reasons including but not limited to, safety or ethical issues or severe non-  
14571 compliance. If the PI determines such action is needed, the PI will discuss this with  
14572 the site investigator (including the reasons for taking such action) at that time. When  
14573 feasible, the PI will provide advance notification to the site investigator of the  
14574 impending action prior to it taking effect.

14575

14576 Individual site Investigators may also terminate their participation in the study at any  
14577 time. If the investigator determines such action is needed, the investigator will  
14578 discuss this with the PI(including the reasons for taking such action) at that time.  
14579 When feasible, the investigator will provide advance notification to the Plof the  
14580 impending action prior to it taking effect.

14581

14582 The PI will promptly inform all other investigators and/or institutions conducting the  
14583 study if the study is suspended or terminated for safety reasons and will also inform



---

14584 the regulatory authorities of the suspension or termination of the study and the  
14585 reason(s) for the action. If required by applicable regulations, the investigator must  
14586 inform the REB promptly and provide the reason for the suspension or termination.

14587

14588 If the study is prematurely discontinued, all study data must be returned to the PI. In  
14589 addition, the investigator has the responsibility to return any used/unused clinical  
14590 supplies.

14591

14592 Financial compensation to investigators and/or institutions will be in accordance  
14593 with the agreement established between the investigator and the PI.

### 14594 **17.5 Records Retention**

14595 Following closure of the study, the site investigator(s) must maintain all site study  
14596 records in a safe and secure location. The records must be maintained to allow easy  
14597 and timely retrieval when needed and whenever feasible, to allow any subsequent  
14598 review of data in conjunction with assessment of the facility, supporting systems and  
14599 staff.

14600

14601 The site investigator(s) will retain study records to comply with all applicable  
14602 regulatory requirements. The minimum retention time will meet the strictest  
14603 standard applicable to that site for the study as dictated by any institutional  
14604 requirements or local laws or regulations of Health Canada standards/procedures;  
14605 otherwise, the retention period will default to 25 years.

14606

14607 The site investigator(s) must inform the PI of any changes in the archival  
14608 arrangements, including but not limited to the following: archival at an off-site  
14609 facility, transfer of ownership of the records in the event the investigator leaves the  
14610 site. The PI should be informed of this change if it affects their access to the  
14611 information in case of an audit.

### 14612 **17.6 Data Management**

14613 Subject data are collected by the investigator or designee using the CRF within an  
14614 Electronic Data Capture (EDC) system. Subject data necessary for analysis and  
14615 reporting will be entered/transmitted into a validated database. Clinical data  
14616 management will be performed in accordance with applicable standards and data  
14617 cleaning procedures. Database lock will occur when data management quality  
14618 control procedures are completed.

### 14619 **17.7 Publication**

14620 The results from the study will be analyzed and published as soon as possible and is  
14621 appropriate. All study-related communications can only be presented or published  
14622 after approval from all relevant members involved in the trial.

14623

14624 All publications shall include appropriate indication named authors as agreed on by  
14625 the members involved in the trial. For the main study reports, senior and first  
14626 authorship will be determined by agreement of the Chief Investigator, the Principal  
14627 Investigator at time of manuscript drafting. Authorship will be based on

---

14628 recommendations of the International Committee of Medical Journal Editors  
14629 ([www.ICMJE.org](http://www.ICMJE.org)) where all authors meet the following for criteria:  
14630  
14631 17. Substantial contributions to the conception or design of the work; or the  
14632 acquisition, analysis, or interpretation of data for the work; AND  
14633 18. Drafting the work or revising it critically for important intellectual content;  
14634 AND  
14635 19. Final approval of the version to be published; AND  
14636 20. Agreement to be accountable for all aspects of the work in ensuring that  
14637 questions related to the accuracy or integrity of any part of the work are  
14638 appropriately investigated and resolved.  
14639  
14640 If there are no named authors (i.e. group authorship) then a writing committee will  
14641 be identified that would usually include these people. The clinical trials.gov  
14642 registration number that will be allocated to this trial will be attached to any  
14643 publications resulting from this trial.  
14644  
14645 Trial funding agencies (OICR, PCC and collaborators as appropriate) will be  
14646 acknowledged in all publications.  
14647  
14648 The members of the trial steering committee will be listed with their affiliations in  
14649 the acknowledgements/appendix of the main publication.  
14650  
14651

14652  
14653  
14654  
14655  
14656  
14657  
14658  
14659  
14660  
14661  
14662  
14663  
14664  
14665  
14666  
14667  
14668  
14669  
14670  
14671  
14672  
14673  
14674  
14675  
14676  
14677  
14678  
14679  
14680  
14681  
14682  
14683  
14684  
14685  
14686  
14687  
14688  
14689  
14690  
14691  
14692  
14693  
14694  
14695

---

## 18. References

1. Cooperberg MR, Carroll PR, Klotz L: **Active surveillance for prostate cancer: progress and promise.** *Journal of clinical oncology : official journal of the American Society of Clinical Oncology* 2011, **29(27):3669-3676.**
2. **PI-RADS(TM) Prostate Imaging – Reporting and Data System V.2.** In.: American College of Radiology; 2015.
3. Dickinson L, Ahmed HU, Allen C, Barentsz JO, Carey B, Futterer JJ, Heijmink SW, Hoskin PJ, Kirkham A, Padhani AR *et al*: **Magnetic resonance imaging for the detection, localisation, and characterisation of prostate cancer: recommendations from a European consensus meeting.** *Eur Urol* 2011, **59(4):477-494.**
4. Heidenreich A, Bastian PJ, Bellmunt J, Bolla M, Joniau S, van der Kwast T, Mason M, Matveev V, Wiegel T, Zattoni F *et al*: **EAU guidelines on prostate cancer. part 1: screening, diagnosis, and local treatment with curative intent-update 2013.** *Eur Urol* 2014, **65(1):124-137.**
5. Center MM, Jemal A, Lortet-Tieulent J, Ward E, Ferlay J, Brawley O, Bray F: **International variation in prostate cancer incidence and mortality rates.** *Eur Urol* 2012, **61(6):1079-1092.**
6. **American Cancer Society Prostate Cancer Key Statistics. Accessed 1st November 2014. Accessed from:**  
<http://www.cancer.org/cancer/prostatecancer/detailedguide/prostate-cancer-key-statistics>[<http://www.cancer.org/cancer/prostatecancer/detailedguide/prostate-cancer-key-statistics>]
7. Loeb S, Heuvel vD, Zhu X, Bangma CH, Schroder FH, Roobol MJ: **Reply from Authors re: Alexandre R. Zlotta, Robert K. Nam. To Biopsy or Not to Biopsy: Thou Shall Think Twice.** *Eur Urol* 2012;**61:11157.** *European urology* 2012, **61(6):1117-1118.**
8. Stamey TA, Freiha FS, McNeal JE, Redwine EA, Whittemore AS, Schmid HP: **Localized prostate cancer. Relationship of tumor volume to clinical significance for treatment of prostate cancer.** *Cancer* 1993, **71(3 Suppl):933-938.**
9. Ahmed HU, Hu Y, Carter T, Arumainayagam N, Lecornet E, Freeman A, Hawkes D, Barratt DC, Emberton M: **Characterizing clinically significant prostate cancer using template prostate mapping biopsy.** *J Urol* 2011, **186(2):458-464.**
10. Netto GJ: **Tumor volume threshold of insignificant prostate cancer--was Dr. Stamey right all along?***J Urol* 2011, **185(1):10-11.**
11. Mowatt G, Scotland G, Boachie C, Cruickshank M, Ford JA, Fraser C, Kurban L, Lam TB, Padhani AR, Royle J *et al*: **The diagnostic accuracy and cost-effectiveness of magnetic resonance spectroscopy and enhanced magnetic resonance imaging techniques in aiding the**

- 
- 14696 **localisation of prostate abnormalities for biopsy: a systematic review**  
14697 **and economic evaluation.** *Health technology assessment* 2013,  
14698 **17(20):vii-xix, 1-281.**
- 14699 12. Morash C, Tey R, Agbassi C, Klotz L, McGowan T, Srigley J, Evans A:  
14700 **Active surveillance for the management of localized prostate cancer:**  
14701 **Guideline recommendations.** *Canadian Urological Association journal =*  
14702 *Journal de l'Association des urologues du Canada* 2015, **9(5-6):171-178.**
- 14703 13. Wilt TJ, Brawer MK, Jones KM, Barry MJ, Aronson WJ, Fox S, Gingrich  
14704 JR, Wei JT, Gilhooly P, Grob BM *et al*: **Radical prostatectomy versus**  
14705 **observation for localized prostate cancer.** *N Engl J Med* 2012,  
14706 **367(3):203-213.**
- 14707 14. Litwin MS, Lubeck DP, Spitalny GM, Henning JM, Carroll PR: **Mental**  
14708 **health in men treated for early stage prostate carcinoma: a**  
14709 **posttreatment, longitudinal quality of life analysis from the Cancer of**  
14710 **the Prostate Strategic Urologic Research Endeavor.** *Cancer* 2002,  
14711 **95(1):54-60.**
- 14712 15. Dall'Era MA, Albertsen PC, Bangma C, Carroll PR, Carter HB, Cooperberg  
14713 MR, Freedland SJ, Klotz LH, Parker C, Soloway MS: **Active surveillance**  
14714 **for prostate cancer: a systematic review of the literature.** *Eur Urol*  
14715 2012, **62(6):976-983.**
- 14716 16. Wilt TJ, MacDonald R, Rutks I, Shamliyan TA, Taylor BC, Kane RL:  
14717 **Systematic review: comparative effectiveness and harms of**  
14718 **treatments for clinically localized prostate cancer.** *Annals of internal*  
14719 *medicine* 2008, **148(6):435-448.**
- 14720 17. **CG58 Prostate cancer: NICE guidance**  
14721 [<http://guidance.nice.org.uk/CG58/NICEGuidance/pdf/English>]
- 14722 18. Nevoux P, Ouzzane A, Ahmed HU, Emberton M, Montironi R, Presti Jr  
14723 JC, Villers A: **Quantitative tissue analyses of prostate cancer foci in an**  
14724 **unselected cystoprostatectomy series.** *BJU Int* 2011.
- 14725 19. Sedelaar JP, Vijverberg PL, De Reijke TM, de la Rosette JJ, Kil PJ,  
14726 Braeckman JG, Hendriks AJ: **Transrectal ultrasound in the diagnosis of**  
14727 **prostate cancer: state of the art and perspectives.** *Eur Urol* 2001,  
14728 **40(3):275-284.**
- 14729 20. Scattoni V, Zlotta A, Montironi R, Schulman C, Rigatti P, Montorsi F:  
14730 **Extended and saturation prostatic biopsy in the diagnosis and**  
14731 **characterisation of prostate cancer: a critical analysis of the literature.**  
14732 *Eur Urol* 2007, **52(5):1309-1322.**
- 14733 21. Djavan B, Ravery V, Zlotta A, Dobronski P, Dobrovits M, Fakhari M, Seitz  
14734 C, Susani M, Borkowski A, Boccon-Gibod L *et al*: **Prospective evaluation**  
14735 **of prostate cancer detected on biopsies 1, 2, 3 and 4: when should we**  
14736 **stop?** *J Urol* 2001, **166(5):1679-1683.**
- 14737 22. Ahmed HU, Kirkham A, Arya M, Illing R, Freeman A, Allen C, Emberton  
14738 M: **Is it time to consider a role for MRI before prostate biopsy?** *Nat Rev*  
14739 *Clin Oncol* 2009, **6(4):197-206.**

- 
- 14740 23. Bossuyt PM, Reitsma JB, Bruns DE, Gatsonis CA, Glasziou PP, Irwig LM,  
14741 Lijmer JG, Moher D, Rennie D, de Vet HC: **Towards complete and**  
14742 **accurate reporting of studies of diagnostic accuracy: the STARD**  
14743 **initiative.** *Clin Radiol* 2003, **58**(8):575-580.
- 14744 24. White S, Hricak H, Forstner R, Kurhanewicz J, Vigneron DB, Zaloudek CJ,  
14745 Weiss JM, Narayan P, Carroll PR: **Prostate cancer: effect of postbiopsy**  
14746 **hemorrhage on interpretation of MR images.** *Radiology* 1995,  
14747 **195**(2):385-390.
- 14748 25. Tanimoto A, Nakashima J, Kohno H, Shinmoto H, Kuribayashi S:  
14749 **Prostate cancer screening: the clinical value of diffusion-weighted**  
14750 **imaging and dynamic MR imaging in combination with T2-weighted**  
14751 **imaging.** *J Magn Reson Imaging* 2007, **25**(1):146-152.
- 14752 26. Kirkham AP, Emberton M, Allen C: **How good is MRI at detecting and**  
14753 **characterising cancer within the prostate?***Eur Urol* 2006, **50**(6):1163-  
14754 1174; discussion 1175.
- 14755 27. Moore CM, Robertson NL, Arsanious N, Middleton T, Villers A, Klotz L,  
14756 Taneja SS, Emberton M: **Image-guided prostate biopsy using magnetic**  
14757 **resonance imaging-derived targets: a systematic review.** *Eur Urol*  
14758 2013, **63**(1):125-140.
- 14759 28. Villers A, Puech P, Mouton D, Leroy X, Ballereau C, Lemaitre L: **Dynamic**  
14760 **contrast enhanced, pelvic phased array magnetic resonance imaging**  
14761 **of localized prostate cancer for predicting tumor volume: correlation**  
14762 **with radical prostatectomy findings.** *J Urol* 2006, **176**(6 Pt 1):2432-  
14763 2437.
- 14764 29. Wu LM, Xu JR, Ye YQ, Lu Q, Hu JN: **The clinical value of diffusion-**  
14765 **weighted imaging in combination with T2-weighted imaging in**  
14766 **diagnosing prostate carcinoma: a systematic review and meta-**  
14767 **analysis.** *AJR Am J Roentgenol* 2012, **199**(1):103-110.
- 14768 30. Wu LM, Xu JR, Gu HY, Hua J, Chen J, Zhang W, Zhu J, Ye YQ, Hu J:  
14769 **Usefulness of diffusion-weighted magnetic resonance imaging in the**  
14770 **diagnosis of prostate cancer.** *Acad Radiol* 2012, **19**(10):1215-1224.
- 14771 31. Umbehr M, Bachmann LM, Held U, Kessler TM, Sulser T, Weishaupt D,  
14772 Kurhanewicz J, Steurer J: **Combined magnetic resonance imaging and**  
14773 **magnetic resonance spectroscopy imaging in the diagnosis of prostate**  
14774 **cancer: a systematic review and meta-analysis.** *Eur Urol* 2009,  
14775 **55**(3):575-590.
- 14776 32. Yamamoto T, Musunuru B, Vesprini D, Zhang L, Ghanem G, Loblaw A,  
14777 Klotz L: **Metastatic Prostate Cancer in Men Initially Managed with**  
14778 **Active Surveillance.** *The Journal of urology* 2015.
- 14779 33. Klotz L, Vesprini D, Sethukavalan P, Jethava V, Zhang L, Jain S,  
14780 Yamamoto T, Mamedov A, Loblaw A: **Long-term follow-up of a large**  
14781 **active surveillance cohort of patients with prostate cancer.** *Journal of*  
14782 *clinical oncology : official journal of the American Society of Clinical*  
14783 *Oncology* 2015, **33**(3):272-277.

- 
- 14784 34. Hoeks CM, Somford DM, van Oort IM, Vergunst H, Oddens JR, Smits  
14785 GA, Roobol MJ, Bul M, Hambroek T, Witjes JA *et al*: **Value of 3-T**  
14786 **Multiparametric Magnetic Resonance Imaging and Magnetic**  
14787 **Resonance-Guided Biopsy for Early Risk Restratification in Active**  
14788 **Surveillance of Low-Risk Prostate Cancer: A Prospective Multicenter**  
14789 **Cohort Study.** *Invest Radiol* 2013.
- 14790 35. Abd-Alazeez M, Ahmed HU, Arya M, Charman SC, Anastasiadis E,  
14791 Freeman A, Emberton M, Kirkham A: **The accuracy of multiparametric**  
14792 **MRI in men with negative biopsy and elevated PSA level-Can it rule**  
14793 **out clinically significant prostate cancer?***Urol Oncol* 2013.
- 14794 36. Kasivisvanathan V, Dufour R, Moore CM, Ahmed HU, Abd-Alazeez M,  
14795 Charman SC, Freeman A, Allen C, Kirkham A, van der Meulen J *et al*:  
14796 **Transperineal magnetic resonance image-targeted prostate biopsy**  
14797 **versus transperineal template prostate biopsy in the detection of**  
14798 **clinically significant prostate cancer.** *J Urol* 2012.
- 14799 37. Haffner J, Lemaitre L, Puech P, Haber GP, Leroy X, Jones JS, Villers A:  
14800 **Role of magnetic resonance imaging before initial biopsy: comparison**  
14801 **of magnetic resonance imaging-targeted and systematic biopsy for**  
14802 **significant prostate cancer detection.** *BJU Int* 2011, **108**(8 Pt 2):E171-  
14803 178.
- 14804 38. Siddiqui MM, Rais-Bahrami S, Turkbey B, George AK, Rothwax J, Shakir  
14805 N, Okoro C, Raskolnikov D, Parnes HL, Linehan WM *et al*: **Comparison**  
14806 **of MR/ultrasound fusion-guided biopsy with ultrasound-guided**  
14807 **biopsy for the diagnosis of prostate cancer.** *Jama* 2015, **313**(4):390-  
14808 397.
- 14809 39. Rosario DJ, Lane JA, Metcalfe C, Donovan JL, Doble A, Goodwin L, Davis  
14810 M, Catto JW, Avery K, Neal DE *et al*: **Short term outcomes of prostate**  
14811 **biopsy in men tested for cancer by prostate specific antigen:**  
14812 **prospective evaluation within ProtecT study.** *BMJ* 2012, **344**:d7894.
- 14813 40. Siddiqui MM, Rais-Bahrami S, Truong H, Stamatakis L, Vourganti S, Nix  
14814 J, Hoang AN, Walton-Diaz A, Shuch B, Weintraub M *et al*: **Magnetic**  
14815 **Resonance Imaging/Ultrasound-Fusion Biopsy Significantly Upgrades**  
14816 **Prostate Cancer Versus Systematic 12-core Transrectal Ultrasound**  
14817 **Biopsy.** *Eur Urol* 2013.
- 14818 41. Wysock JS, Rosenkrantz AB, Huang WC, Stifelman MD, Lepor H, Deng  
14819 FM, Melamed J, Taneja SS: **A Prospective, Blinded Comparison of**  
14820 **Magnetic Resonance (MR) Imaging-Ultrasound Fusion and Visual**  
14821 **Estimation in the Performance of MR-targeted Prostate Biopsy: The**  
14822 **PROFUS Trial.** *Eur Urol* 2013.
- 14823 42. **Undertaking a transrectal ultrasound guided biopsy of the prostate.**  
14824 **Public Health England Prostate Cancer Risk Management Programme**  
14825 **Guidelines.** [http://www.cancerscreening.nhs.uk/prostate/pcrmp-guide-](http://www.cancerscreening.nhs.uk/prostate/pcrmp-guide-1.html)  
14826 [1.html](http://www.cancerscreening.nhs.uk/prostate/pcrmp-guide-1.html) [<http://www.cancerscreening.nhs.uk/prostate/pcrmp-guide-1.html>]

- 
- 14827 43. Epstein JI, Allsbrook WC, Jr., Amin MB, Egevad LL, Committee IG: **The**  
14828 **2005 International Society of Urological Pathology (ISUP) Consensus**  
14829 **Conference on Gleason Grading of Prostatic Carcinoma.** *The American*  
14830 *journal of surgical pathology* 2005, **29**(9):1228-1242.
- 14831 44. Cullen J, Rosner IL, Brand TC, Zhang N, Tsiatis AC, Moncur J, Ali A, Chen  
14832 Y, Knezevic D, Maddala T *et al*: **A Biopsy-based 17-gene Genomic**  
14833 **Prostate Score Predicts Recurrence After Radical Prostatectomy and**  
14834 **Adverse Surgical Pathology in a Racially Diverse Population of Men**  
14835 **with Clinically Low- and Intermediate-risk Prostate Cancer.** *European*  
14836 *urology* 2015, **68**(1):123-131.
- 14837 45. Bryant RJ, Sjoberg DD, Vickers AJ, Robinson MC, Kumar R, Marsden L,  
14838 Davis M, Scardino PT, Donovan J, Neal DE *et al*: **Predicting High-Grade**  
14839 **Cancer at Ten-Core Prostate Biopsy Using Four Kallikrein Markers**  
14840 **Measured in Blood in the ProtecT Study.** *Journal of the National*  
14841 *Cancer Institute* 2015, **107**(7).
- 14842 46. Nam RK, Cheung P, Herschorn S, Saskin R, Su J, Klotz LH, Chang M,  
14843 Kulkarni GS, Lee Y, Kodama RT *et al*: **Incidence of complications other**  
14844 **than urinary incontinence or erectile dysfunction after radical**  
14845 **prostatectomy or radiotherapy for prostate cancer: a population-**  
14846 **based cohort study.** *The Lancet Oncology* 2014, **15**(2):223-231.
- 14847 47. Pocock SJ, Simon R: **Sequential treatment assignment with balancing**  
14848 **for prognostic factors in the controlled clinical trial.** *Biometrics* 1975,  
14849 **31**(1):103-115.
- 14850 48. Moore CM, Kasivisvanathan V, Eggener S, Emberton M, Futterer JJ, Gill  
14851 IS, Grubb lii RL, Hadaschik B, Klotz L, Margolis DJ *et al*: **Standards of**  
14852 **Reporting for MRI-targeted Biopsy Studies (START) of the Prostate:**  
14853 **Recommendations from an International Working Group.** *Eur Urol*  
14854 2013, **64**(4):544-552.
- 14855 49. Presti JC, Jr.: **Prostate biopsy: how many cores are enough?** *Urologic*  
14856 *oncology* 2003, **21**(2):135-140.  
14857  
14858

14859

## Appendices

14860

### Appendix 1: Time windows for data collection

14861

14862 For the overall schedule of visits for each arm please see Section 9.3, Tables 1-3

14863 For details on time windows permitted for each trial intervention to be completed

14864 please see Table 5 below.

14865

14866 Table 5: Details of time windows permitted for all trial interventions.

14867

| Contact and Purpose if not clear                                                                                                                                    | Time window permitted +/-30 days of scheduled visit                                                                                                                                                                                                                                                                                                                                                                                                  |
|---------------------------------------------------------------------------------------------------------------------------------------------------------------------|------------------------------------------------------------------------------------------------------------------------------------------------------------------------------------------------------------------------------------------------------------------------------------------------------------------------------------------------------------------------------------------------------------------------------------------------------|
| <b>Visit 1</b><br><br>Screening (eligibility review, med hx,)                                                                                                       | Any time following referral of subject.<br><br>Ideally perform as soon as possible following receipt of referral.                                                                                                                                                                                                                                                                                                                                    |
| <b>Visit 1</b><br><br>Consent<br><br>Vitals, DRE<br><br>Randomization<br><br>EQ-5D-5L Questionnaire (baseline)<br><br>Optional blood, urine semen and tissue sample | Complete only once subject has had 24 hours after receiving the patient information to fully consider the study.<br><br>Ideally on same visit as screening.<br><br>Complete at screening<br><br>Immediately after consent form signed and eligibility is confirmed.<br><br>Complete immediately after consent form is signed<br><br>Complete after additional informed consent signed, after randomization and up until any point prior to a biopsy. |
| <b>Visit 2</b><br><br>MRI                                                                                                                                           | Only for men randomized to this arm.<br><br>Any time following randomization. Ideally within 1 week of randomization.                                                                                                                                                                                                                                                                                                                                |



|                                                                                                          |                                                                                                                                                                                                                                                                                                                                                                                                                                                                                                                                                                                                                                                                                                                                                                                        |
|----------------------------------------------------------------------------------------------------------|----------------------------------------------------------------------------------------------------------------------------------------------------------------------------------------------------------------------------------------------------------------------------------------------------------------------------------------------------------------------------------------------------------------------------------------------------------------------------------------------------------------------------------------------------------------------------------------------------------------------------------------------------------------------------------------------------------------------------------------------------------------------------------------|
| <p><b>Visit 3</b></p> <p>MRI-Targeted Biopsy of Prostate</p>                                             | <p>Only for men randomized to this arm who have a lesion on MRI that needs a biopsy.</p> <p>Any time following the MRI being reported, ideally within 1 week of MRI.</p> <p>Depending on local Urology service structure, an appointment for a biopsy may need to be booked at the same time as the MRI is booked (i.e. immediately after randomization) in order for a slot to be secured for a biopsy to occur in timely fashion.</p> <p>If it is determined from the MRI that a biopsy is not required then the biopsy appointment can be used instead of Visit 4 for follow up of results and treatment decision.</p>                                                                                                                                                              |
| <p><b>Visit 3</b></p> <p>Systematic TRUS guided biopsy</p>                                               | <p>Only for men randomized to this arm.</p> <p>Any time following randomization. Ideally within 4 weeks of randomization.</p>                                                                                                                                                                                                                                                                                                                                                                                                                                                                                                                                                                                                                                                          |
| <p><b>Visit 3</b></p> <p>Immediate post-biopsy questionnaire</p> <p>30-day post-biopsy questionnaire</p> | <p>Should be completed and returned immediately after a biopsy, before the subject leaves the department. As long as questionnaire completed within 24 hours it will be acceptable.</p> <p>To be given to subject to take home after biopsy and completed as instructed on day 30 post-biopsy.</p> <p>To be returned by post or at follow up appointment (Visit 4).</p> <p>If Visit 4 is earlier than 30 days post biopsy then this questionnaire can be given to the research team when 30 days is finally complete.</p> <p>If Visit 4 is on or later than 30 days then this can be returned at the Visit 4 appointment.</p> <p>As long as questionnaire is completed at 30-60 days post-biopsy, it will be acceptable. Ideally the questionnaire should be completed as close as</p> |

|                                                                                                             |                                                                                                                                                                                                                                                                                                                                                                                                                                                                                              |
|-------------------------------------------------------------------------------------------------------------|----------------------------------------------------------------------------------------------------------------------------------------------------------------------------------------------------------------------------------------------------------------------------------------------------------------------------------------------------------------------------------------------------------------------------------------------------------------------------------------------|
| Telephone reminder                                                                                          | <p>possible to 30 days post-biopsy.</p> <p>At 30-days post biopsy a member of the research team will phone the subject to remind them to fill out the 30-day questionnaires</p>                                                                                                                                                                                                                                                                                                              |
| <p><b>Visit 4</b></p> <p>Follow up for results<br/>And treatment Decision</p> <p>EQ-5D-5L Questionnaire</p> | <p>Should be completed as soon as possible following the availability of any pathology results. Alternatively, if a man is in the MRI arm and the MRI is negative, this follow up should occur after the availability of the MRI report. Ideally the follow up appointment should be within 6 weeks of randomization.</p> <p>Depending on local Urology service structure, these results may need to be discussed at an MDT meeting to inform treatment decision.</p> <p>To be completed</p> |
| <p><b>Visit 5</b></p> <p><b>26 week follow up</b></p>                                                       | <ul style="list-style-type: none"> <li>• Vitals, DRE</li> <li>• PSA</li> <li>• Optional blood</li> </ul>                                                                                                                                                                                                                                                                                                                                                                                     |
| <p><b>Visit 6</b></p> <p>1 year follow up<br/>52 week follow up visit</p>                                   | <p>The following information will be obtained on an annual basis:</p> <ul style="list-style-type: none"> <li>• Vitals, DRE</li> <li>• time to cancer diagnosis;</li> <li>• Gleason score progression;</li> <li>• time to intervention on active surveillance;</li> <li>• time on active surveillance;</li> <li>• results of PSA tests.</li> <li>• results of any off protocol biopsies or MRI</li> <li>• optional sample collection (blood, urine)</li> </ul>                                |
| <p><b>Visit 7</b></p> <p><b>78 week follow up</b></p>                                                       | <ul style="list-style-type: none"> <li>• Vitals, DRE</li> <li>• PSA</li> <li>• Optional blood</li> </ul>                                                                                                                                                                                                                                                                                                                                                                                     |

**Visit 8**

104 week follow up visit

The following information will be obtained on an annual basis:

- Vitals, DRE
- time to cancer diagnosis;
- Gleason score progression;
- time to intervention on active surveillance;
- time on active surveillance;
- results of PSA tests.
- Optional sample collection (blood, urine)

Those subjects randomized to ARM A but who did not have an MPMRI-targeted biopsy will have an additional MPMRI at Visit 8. This will be followed by a targeted-biopsy if results of MRI are positive (PI-RADS 3-5).

All patients in both Arm A and B who have remained undiagnosed or untreated (on active surveillance) will have a follow up MRI 2 years after study entry.

Follow-up will cease once treatment beyond active surveillance is undertaken (prostatectomy, radiation therapy, focal therapy, etc.).

14868

14869

14870  
14871  
14872  
14873

---

## Appendix 2: MPMRI Reporting Proforma

**Date of MRI scan:**

|                      |                      |                      |                      |                      |                      |                      |                      |
|----------------------|----------------------|----------------------|----------------------|----------------------|----------------------|----------------------|----------------------|
| <input type="text"/> |
| day                  |                      | month                |                      |                      | year                 |                      |                      |

**Date of Report:**

|                      |                      |                      |                      |                      |                      |                      |                      |
|----------------------|----------------------|----------------------|----------------------|----------------------|----------------------|----------------------|----------------------|
| <input type="text"/> |
| day                  |                      | month                |                      |                      | year                 |                      |                      |

**Reporting Radiologist:**

14874  
14875  
14876  
14877

**Form Completion Instructions:**

14878 Radiologists should annotate this diagram with up to 3 suspicious areas  
14879 scoring 3 or greater on the PI-RADS v2 scale of suspicion. The three most  
14880 suspicious areas should be annotated, each with the score clearly marked.

14881  
14882 "T1" should be the area with the greatest degree of suspicion. If  
14883 applicable, "T2" should be the area with the next greatest degree of  
14884 suspicion and finally if applicable, "T3" should be the area with the next  
14885 greatest degree of suspicion.

14886  
14887 For each suspicious area, triaxial measurements should be recorded with  
14888 all 3 measurements in orthogonal planes provided whenever possible. In  
14889 the PZ, lesions should be measured on ADC. In the TZ, lesions should be  
14890 measured on T2W.

14891  
14892 If lesion measurement is difficult or compromised on ADC (for PZ) or T2W  
14893 (for TZ), measurement should be made on the sequence that show the  
14894 lesion best. For example, coronal measurements may be best performed  
14895 in the peripheral zone on T2 images.

14896  
14897

**IMPORTANT SUBMISSION INSTRUCTIONS:**

14898

14900 **Please send this completed case report form and a DVD with the images AND**  
14901 **completed MRI Report to:**

14902

14903 Marlene Kebabdjian  
14904 Sunnybrook Health Sciences Centre  
14905 Urology Research, A304  
14906 2075 Bayview Avenue, A304  
14907 Toronto, Ontario, M4N 3M5

14908  
14909  
14910  
14911  
14912

14913  
 14914  
 14915  
 14916  
 14917  
 14918  
 14919  
 14920  
 14921  
 14922  
 14923  
 14924  
 14925  
 14926  
 14927  
 14928  
 14929  
 14930  
 14931  
 14932  
 14933  
 14934  
 14935  
 14936  
 14937  
 14938  
 14939  
 14940  
 14941  
 14942  
 14943  
 14944  
 14945  
 14946  
 14947  
 14948  
 14949  
 14950  
 14951  
 14952  
 14953  
 14954  
 14955  
 14956  
 14957  
 14958  
 14959

NO DCE (Part 1 or 2) – T2/DWI/ADC  
**DO NOT VIEW DCE – YOU SHOULD NOT KNOW THE PSA**

Draw lesions on diagram below annotating each with the T index (i.e T1; T2...)

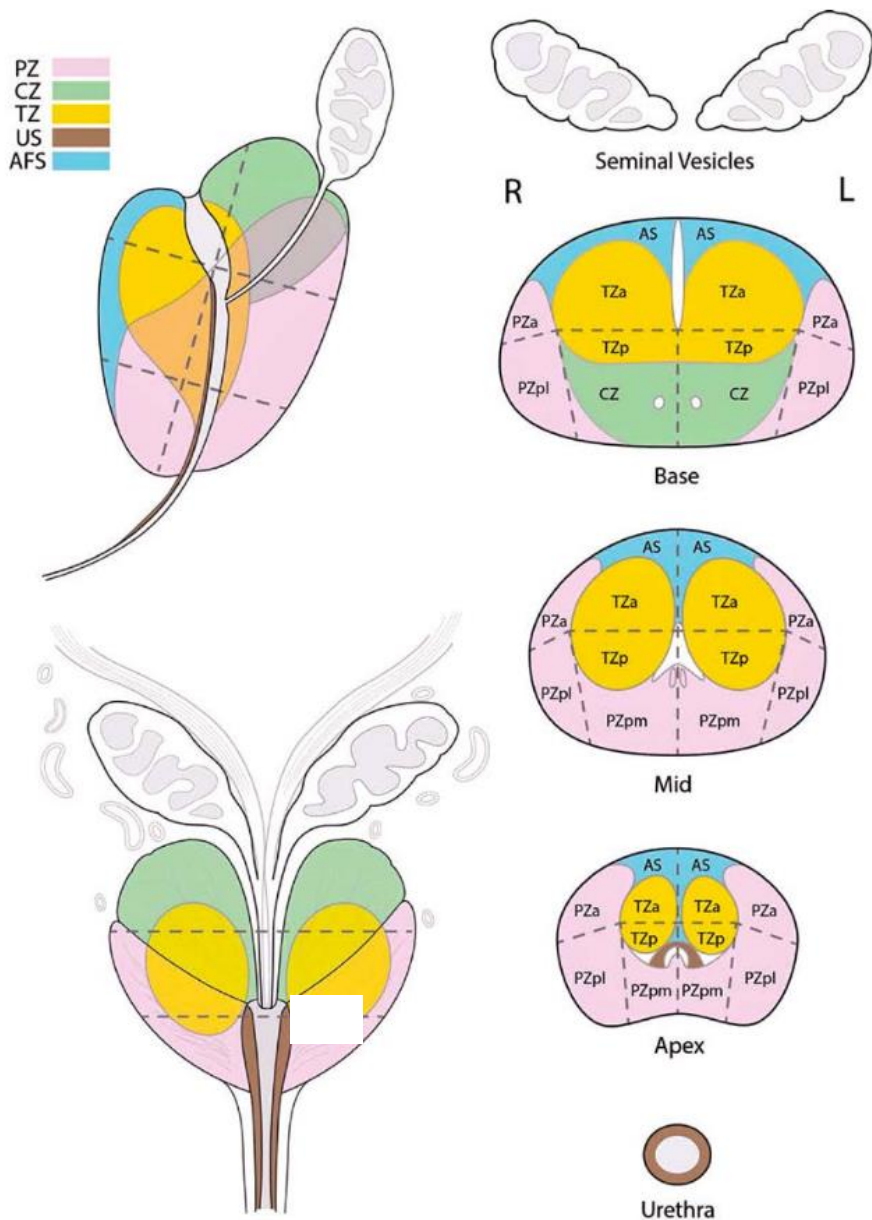

14960  
14961  
14962  
14963  
14964

---

NO DCE (Part 1 or 2) – T2/DWI/ADC  
**DO NOT VIEW DCE – YOU SHOULD NOT KNOW THE  
PSA**

**Image quality:**     Good  
**(DWI + T2)**         Minor image quality issues (still acceptable)  
                               Unacceptable but some lesions seen warranting biopsy  
                               Unacceptable, can't interpret at all

14965  
14966  
14967  
14968  
14969  
14970  
14971  
14972

**If image quality is not good please comment:**

---

---

---

---

---

14973

**How to record locations**

14974  
14975  
14976  
14977  
14978

**Location Code Format:** (L/R), (B/M/A), Pi-RadsZone (AS, TZa, TZp, CZ, PZa, PZpl, PZpm)

14979

Number of candidate tumor sites: \_\_\_\_\_

14980

**If none, please proceed to Section B**

14981

14982

**Section A:**

14983

**Target 1** (*Highest Pi-Rads score and then largest*):

14984

Present (Y/N): \_\_\_\_\_

14985

Overall Pi-Rads Score(1-5): \_\_\_\_\_ Your Likert Score(1-5): \_\_\_\_\_

14986

Pi-Rads Score (T2) (1-5) : \_\_\_\_\_ Pi-Rads Score (DWI) (1-5): \_\_\_\_\_

14987

Mean ADC: \_\_\_\_\_ Min ADC – single voxel: \_\_\_\_\_ mm<sup>2</sup>/s

14988

x10<sup>-6</sup>

14989

Size: \_\_\_\_\_x\_\_\_\_\_ x \_\_\_\_\_mm (Ax1 > Ax2 x SI)

14990

Location(s) (largest to smallest area involved):

14991

\_\_\_\_\_, \_\_\_\_\_, \_\_\_\_\_, \_\_\_\_\_

14992

\_\_\_\_\_, \_\_\_\_\_, \_\_\_\_\_, \_\_\_\_\_ (as per location code

14993

format above)

14994

14995

Extraprostatic extension:  No     Yes     Equivocal \_\_\_\_\_

14996

14997

**Target 2:**

14998

Present (Y/N): \_\_\_\_\_

15000

Overall Pi-Rads Score(1-5): \_\_\_\_\_ Your Likert Score(1-5): \_\_\_\_\_

15001

Pi-Rads Score (T2) (1-5) : \_\_\_\_\_ Pi-Rads Score (DWI) (1-5): \_\_\_\_\_

15002

Mean ADC: \_\_\_\_\_ Min ADC – single voxel: \_\_\_\_\_ mm<sup>2</sup>/s

15003

x10<sup>-6</sup>

15004

Size: \_\_\_\_\_x\_\_\_\_\_ x \_\_\_\_\_mm (Ax1 > Ax2 x SI)

15005 Location(s) (largest to smallest area involved):  
 15006 \_\_\_\_\_/\_\_\_\_\_/\_\_\_\_\_/\_\_\_\_\_  
 15007 \_\_\_\_\_/\_\_\_\_\_/\_\_\_\_\_/\_\_\_\_\_ (as per location code  
 15008 format above)  
 15009 Extraprostatic extension:  No  Yes  Equivocal  
 15010  
 15011

15012 **Target 3:**

15013 Present (Y/N): \_\_\_\_\_  
 15014 Overall Pi-Rads Score(1-5): \_\_\_\_\_ Your Likert Score(1-5): \_\_\_\_\_  
 15015 Pi-Rads Score (T2) (1-5) : \_\_\_\_\_ Pi-Rads Score (DWI) (1-5): \_\_\_\_\_  
 15016 Mean ADC: \_\_\_\_\_ Min ADC – single voxel: \_\_\_\_\_ mm<sup>2</sup>/s  
 15017 x10<sup>-6</sup>  
 15018 Size: \_\_\_\_\_x\_\_\_\_\_x\_\_\_\_\_mm (Ax1 > Ax2 x SI)  
 15019 Location(s) (largest to smallest area involved):

15020 \_\_\_\_\_/\_\_\_\_\_/\_\_\_\_\_/\_\_\_\_\_  
 15021 \_\_\_\_\_/\_\_\_\_\_/\_\_\_\_\_/\_\_\_\_\_ (as per location code  
 15022 format above)  
 15023  
 15024 Extraprostatic extension:  No  Yes  Equivocal  
 15025

15026 There are more than 3 targets seen (Y/N): \_\_\_\_\_  
 15027 If yes give describe:

15028 \_\_\_\_\_  
 15029 \_\_\_\_\_  
 15030 \_\_\_\_\_

15031 **Section B:**

|                                                                                                                  |                                                                                                                  |
|------------------------------------------------------------------------------------------------------------------|------------------------------------------------------------------------------------------------------------------|
| <b>LSV invasion:</b> <input type="checkbox"/> No <input type="checkbox"/> Yes <input type="checkbox"/> Equivocal | <b>RSV invasion:</b> <input type="checkbox"/> No <input type="checkbox"/> Yes <input type="checkbox"/> Equivocal |
| <b>Adenopathy:</b> <input type="checkbox"/> No <input type="checkbox"/> Yes <input type="checkbox"/> Equivocal   | <b>Worst PI-RADS Score:</b> _____                                                                                |

15033  
 15034  
 15035  
 15036  
 15037  
 15038  
 15039  
 15040

Other Findings:

\_\_\_\_\_

|       |      |       |      |       |      |                |       |    |
|-------|------|-------|------|-------|------|----------------|-------|----|
| _____ | (SI) | _____ | (AP) | _____ | (LR) | <b>Volume:</b> | _____ | cc |
| cm    | x    | cm    | x    | cm    |      |                |       |    |

15041  
 15042  
 15043  
 15044  
 15045  
 15046  
 15047  
 15048  
 15049  
 15050

15051  
15052  
15053  
15054  
15055  
15056  
15057

---

DCE (Part 2 or 2) – T2/DWI/ADC/DCE  
**VIEW DCE – YOU SHOULD NOT KNOW THE PSA**

**Image quality  
of DCE + DWI +  
T2:**

- Good**
- Minor image quality issues (still acceptable)**
- Unacceptable but some lesions seen warranting biopsy**
- Unacceptable, can't interpret at all**

15058  
15059  
15060  
15061  
15062  
15063  
15064

If image quality is not good please comment:

---

\_\_\_\_\_

---

\_\_\_\_\_

15065  
15066  
15067

Number of candidate tumor sites: \_\_\_\_\_  
**If none, please proceed to Section C**

15068  
15069

There was a change in lesions number or rank when adding DCE sequence:  No  Yes

15070  
15071  
15072  
15073

If Yes, please give the correspondence between Target numbers with and without DCE (i.e. Target 1 without DCE = Target x with DCE) and **fill in all fields below to avoid confusion. Also draw lesions on diagram below again**

15074  
15075

**Also draw lesions on diagram on next page again.**

15076  
15077  
15078

**Correspondence:**

15079  
15080  
15081

Old T1 = New T\_\_\_\_      Old T2 = New T\_\_\_\_      Old T3 = New  
T\_\_\_\_

15082  
15083  
15084  
15085  
15086  
15087  
15088  
15089  
15090  
15091  
15092  
15093



15094  
 15095  
 15096  
 15097  
 15098  
 15099  
 15100  
 15101  
 15102  
 15103

**If there is change from Part 1 please redraw all lesions on diagram below annotating each with the T index (i.e T1; T2...)**



15104

**Target 1:**

Present:  No  Yes

Change from Part 1:  No  Yes

**If YES, complete ALL sections below**

**If NO change in scores, ONLY complete DCE PiRads score below.**

**All other entries are assumed = to Part 1**

Overall Pi-Rads Score: \_\_\_\_\_ Your Likert Score: \_\_\_\_\_

Pi-Rads Score (T2) : \_\_\_\_\_ Pi-Rads Score (DWI): \_\_\_\_\_

**Pi-Rads Score (DCE, 0,1): \_\_\_\_\_**

15114

Mean ADC: \_\_\_\_\_ Min ADC – single voxel: \_\_\_\_\_ mm<sup>2</sup>/s  
 x10<sup>-6</sup>

Size: \_\_\_\_\_ x \_\_\_\_\_ x \_\_\_\_\_ mm (Ax1 > Ax2 x SI)

Location(s) (largest to smallest area involved):

\_\_\_\_\_ / \_\_\_\_\_ / \_\_\_\_\_ / \_\_\_\_\_

\_\_\_\_\_ / \_\_\_\_\_ / \_\_\_\_\_ / \_\_\_\_\_

Extraprostatic extension:  No  Yes  Equivocal

15122

15123  
15124  
15125  
15126  
15127  
15128  
15129  
15130  
15131  
15132  
15133  
15134  
15135  
15136  
15137  
15138  
15139  
15140  
15141  
15142  
15143  
15144  
15145  
15146  
15147  
15148  
15149  
15150  
15151  
15152  
15153  
15154  
15155  
15156  
15157  
15158  
15159  
15160  
15161  
15162  
15163  
15164  
15165  
15166  
15167  
15168  
15169  
15170  
15171  
15172  
15173

**Target 2:**

Present:  No  Yes

Change from Part 1:  No  Yes

**If YES, complete ALL sections below**

**If NO change in scores, ONLY complete DCE PiRads score below.**

**All other entries are assumed = to Part 1**

Overall Pi-Rads Score: \_\_\_\_\_ Your Likert Score: \_\_\_\_\_

Pi-Rads Score (T2) : \_\_\_\_\_ Pi-Rads Score (DWI): \_\_\_\_\_

**Pi-Rads Score (DCE, 0,1):** \_\_\_\_\_

Mean ADC: \_\_\_\_\_ Min ADC – single voxel: \_\_\_\_\_ mm<sup>2</sup>/s  
x10<sup>-6</sup>

Size: \_\_\_\_\_x\_\_\_\_\_ x \_\_\_\_\_mm (Ax1 > Ax2 x SI)

Location(s) (largest to smallest area involved):

\_\_\_\_\_ / \_\_\_\_\_ / \_\_\_\_\_ / \_\_\_\_\_

\_\_\_\_\_ / \_\_\_\_\_ / \_\_\_\_\_ / \_\_\_\_\_

Extraprostatic extension:  No  Yes  Equivocal

**Target 3:**

Present:  No  Yes

Change from Part 1:  No  Yes

**If YES, complete ALL sections below**

**If NO change in scores, ONLY complete DCE PiRads score below.**

**All other entries are assumed = to Part 1**

Overall Pi-Rads Score: \_\_\_\_\_ Your Likert Score: \_\_\_\_\_

Pi-Rads Score (T2) : \_\_\_\_\_ Pi-Rads Score (DWI): \_\_\_\_\_

**Pi-Rads Score (DCE, 0,1):** \_\_\_\_\_

Mean ADC: \_\_\_\_\_ Min ADC – single voxel: \_\_\_\_\_ mm<sup>2</sup>/s  
x10<sup>-6</sup>

Size: \_\_\_\_\_x\_\_\_\_\_ x \_\_\_\_\_mm (Ax1 > Ax2 x SI)

Location(s) (largest to smallest area involved):

\_\_\_\_\_ / \_\_\_\_\_ / \_\_\_\_\_ / \_\_\_\_\_

\_\_\_\_\_ / \_\_\_\_\_ / \_\_\_\_\_ / \_\_\_\_\_

Extraprostatic extension:  No  Yes

There are more than 3 targets seen (Y/N): \_\_\_\_\_

If yes give describe:

\_\_\_\_\_

\_\_\_\_\_

\_\_\_\_\_

\_\_\_\_\_

Section C:

**LSV invasion:**  No  Yes  Equivocal

**RSV invasion:**  No  Yes   
Equivocal



15226  
15227

---

15228 **Appendix 3: Example of systematic TRUS guided biopsy schema**

15229

15230 Figure depicting 12-core systematic TRUS guided biopsyschema that sites are  
15231 recommended to follow. Axial/coronal sections of a prostate gland (left) showing  
15232 biopsy courses of the 12 biopsies performed under ultrasound guidance with an end  
15233 fire probe. Upperright: axial planes in the sagittal view. a, base; b, mid-gland; c,

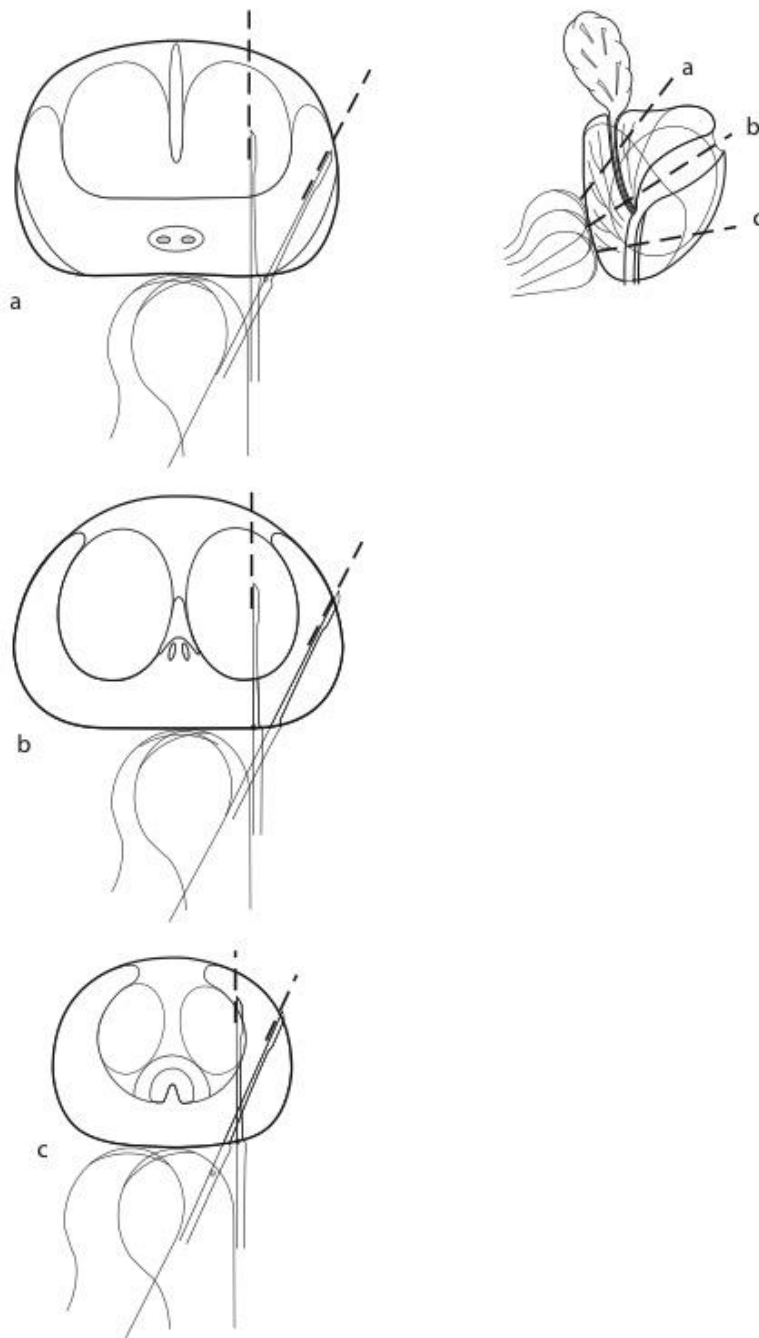

15235

15236 **Appendix 4: 2-page EQ-5D-5L Questionnaire**

15237 Under each heading, please tick the ONE box that best describes your health TODAY

15238

15239 **MOBILITY**

15240 I have no problems in walking about

15241 I have slight problems in walking about

- 
- 15242 I have moderate problems in walking about
- 15243 I have severe problems in walking about
- 15244 I am unable to walk about
- 15245
- 15246 **SELF-CARE**
- 15247 I have no problems washing or dressing myself
- 15248 I have slight problems washing or dressing myself
- 15249 I have moderate problems washing or dressing myself
- 15250 I have severe problems washing or dressing myself
- 15251 I am unable to wash or dress myself
- 15252
- 15253 **USUAL ACTIVITIES** (*e.g. work, study, housework,*  
15254 *family or leisure activities*)
- 15255 I have no problems doing my usual activities
- 15256 I have slight problems doing my usual activities
- 15257 I have moderate problems doing my usual activities
- 15258 I have severe problems doing my usual activities
- 15259 I am unable to do my usual activities
- 15260
- 15261 **PAIN / DISCOMFORT**
- 15262 I have no pain or discomfort
- 15263 I have slight pain or discomfort
- 15264 I have moderate pain or discomfort
- 15265 I have severe pain or discomfort
- 15266 I have extreme pain or discomfort
- 15267
- 15268 **ANXIETY / DEPRESSION**
- 15269 I am not anxious or depressed
- 15270 I am slightly anxious or depressed
- 15271 I am moderately anxious or depressed
- 15272 I am severely anxious or depressed
- 15273 I am extremely anxious or depressed
- 15274
- 15275 © 1990 EuroQol Group. EQ-5D™ is a trade mark of the EuroQol Group

15276

15277 • We would like to know how good or bad your health  
15278 is TODAY.

The best health  
you can imagine

15279 • This scale is numbered from 0 to 100.

15280 • 100 means the best health you can imagine.

15281 0 means the worst health you can imagine.

15282 • Mark an X on the scale to indicate how your health is  
15283 TODAY.

15284 • Now, please write the number you marked on the  
15285 scale in the box below.

15286

15287

15288

15289

15290

15291

YOUR HEALTH TODAY=

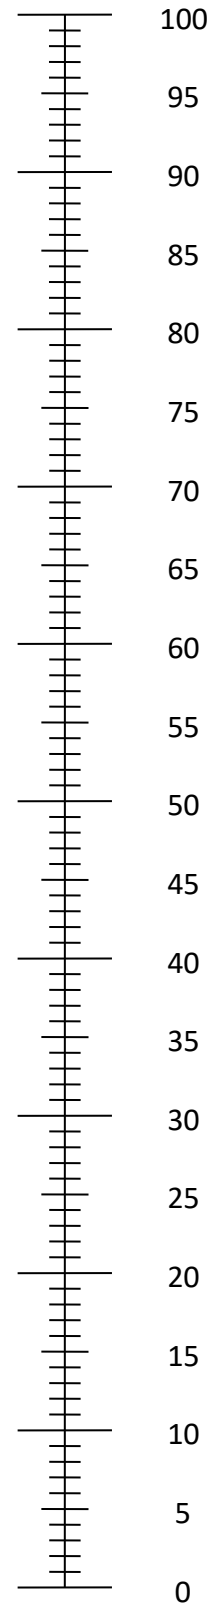

The worst health  
you can imagine

### Appendix 5: Immediate post biopsy questionnaire

#### Immediate post-biopsy questionnaire

Please ask the patient to fill this out after the biopsy, before they leave the department.

Please tick the box corresponding to the number, which describes how you felt immediately after the biopsy procedure:

1. Overall, how much discomfort did the biopsy procedure cause you?

|                          |                          |                          |                          |                          |                          |                          |                          |                           |                          |                          |
|--------------------------|--------------------------|--------------------------|--------------------------|--------------------------|--------------------------|--------------------------|--------------------------|---------------------------|--------------------------|--------------------------|
| 0                        | 1                        | 2                        | 3                        | 4                        | 5                        | 6                        | 7                        | 8                         | 9                        | 10                       |
| <input type="checkbox"/>  | <input type="checkbox"/> | <input type="checkbox"/> |
| No Discomfort            |                          |                          | Moderate Discomfort      |                          |                          |                          |                          | Worst Discomfort Possible |                          |                          |

2. Overall, how much pain did the biopsy procedure cause you?

|                          |                          |                          |                          |                          |                          |                          |                          |                          |                          |                          |
|--------------------------|--------------------------|--------------------------|--------------------------|--------------------------|--------------------------|--------------------------|--------------------------|--------------------------|--------------------------|--------------------------|
| 0                        | 1                        | 2                        | 3                        | 4                        | 5                        | 6                        | 7                        | 8                        | 9                        | 10                       |
| <input type="checkbox"/> |
| No Pain                  |                          |                          | Moderate Pain            |                          |                          |                          |                          | Worst pain Possible      |                          |                          |

- 
- 
- 
- 
- 
- 
- 
- 
- 
- 
- 
- 
- 
- 
- 
- 
- 
- 
- 
- 

Please complete the next page of questions



---

Did you experience any of the following in the month **before** your biopsy procedure.  
For each question, tick the box that applies:

3. Fevers

Yes  
  
1

No  
  
2

4. Blood in the urine

Yes  
  
1

No  
  
2

5. Blood in the semen

Yes  
  
1

No  
  
2

6. Blood in the stools or from the back passage

Yes  
  
1

No  
  
2

7. Acute urinary retention, meaning the painful inability to pass urine which was relieved by passing a catheter into the bladder through the penis

Yes  
  
1

No  
  
2

8. Erectile dysfunction, meaning the persistent inability to get and maintain an erection sufficient to allow satisfactory sexual performance

Yes  
  
1

No  
  
2

9. Urinary incontinence, meaning any undesired leakage of urine

Yes  
  
1

No  
  
2

10. Urinary tract infection diagnosed by a healthcare professional

Yes  
  
1

No  
  
2

11. Pain at the site where the biopsies were taken from

Yes  
  
1

No  
  
2

**Thank you for completing the questionnaire. Please hand this to a member of staff before you leave. Please ensure you are given the 30-day questionnaire for completion at 30 days following the biopsy.**

15295

**Appendix 6: 30-day post biopsy questionnaire**

**30-day post biopsy questionnaire**

30-days after the biopsy procedure, the patient should complete this questionnaire:

Did you experience the following problem in the 30-days after the biopsy procedure:

1. Fevers

Yes  No

1 2

2. If you answered yes, specify on which days after the biopsy you had this? (*tick as many boxes as are applicable*)

Days: 0-2 3-5 6-10 11-15 16-20 21-30

|   |   |   |   |   |   |
|---|---|---|---|---|---|
|   |   |   |   |   |   |
| 1 | 2 | 3 | 4 | 5 | 6 |

3. If you answered yes, how much of a problem was this for you? (*tick one box*)

Not a problem at all Minor Problem Moderate Problem Major Problem

1 2 3 4

Did you experience the following problem in the 30-days after the biopsy procedure:

4. Blood in the urine

Yes  No

1 2

5. If you answered yes, specify on which days after the biopsy you had this? (*tick as many boxes as are applicable*)

Days: 0-2 3-5 6-10 11-15 16-20 21-30

|   |   |   |   |   |   |
|---|---|---|---|---|---|
|   |   |   |   |   |   |
| 1 | 2 | 3 | 4 | 5 | 6 |

6. If you answered yes, how much of a problem was this for you? (*tick one box*)

Not a problem at all Minor Problem Moderate Problem Major Problem

1 2 3 4

Did you experience the following problem in the 30-days after the biopsy procedure:

7. Blood in the semen

Yes  No

1 2

8. If you answered yes, specify on which days after the biopsy you had this? (*tick as many boxes as are applicable*)

Days: 0-2 3-5 6-10 11-15 16-20 21-30

|   |   |   |   |   |   |
|---|---|---|---|---|---|
|   |   |   |   |   |   |
| 1 | 2 | 3 | 4 | 5 | 6 |

9. If you answered yes, how much of a problem was this for you? (*tick one box*)

Not a problem at all Minor Problem Moderate Problem Major Problem

1 2 3 4

Did you experience the following problem in the 30-days after the biopsy procedure:

10. Blood in the stools or from the back passage

Yes  No   
1 2

11. If you answered yes, how long after the biopsy did you have this for? (*tick one*)

Days: 0-2 3-5 6-10 11-15 16-20 21-30

|                          |                          |                          |                          |                          |                          |
|--------------------------|--------------------------|--------------------------|--------------------------|--------------------------|--------------------------|
| <input type="checkbox"/> |
| 1                        | 2                        | 3                        | 4                        | 5                        | 6                        |

12. If you answered yes, how much of a problem was this for you? (*tick one box*)

Not a problem at all Minor Problem Moderate Problem Major Problem

|                          |                          |                          |                          |
|--------------------------|--------------------------|--------------------------|--------------------------|
| <input type="checkbox"/> | <input type="checkbox"/> | <input type="checkbox"/> | <input type="checkbox"/> |
| 1                        | 2                        | 3                        | 4                        |

Did you experience the following problem in the 30-days after the biopsy procedure:

13. Acute urinary retention, meaning the painful inability to pass urine which was relieved by passing a catheter into the bladder through the penis

Yes  No   
1 2

14. If you answered yes, how long after the biopsy did this occur? (*tick one*)

Days: 0-2 3-5 6-10 11-15 16-20 21-30

|                          |                          |                          |                          |                          |                          |
|--------------------------|--------------------------|--------------------------|--------------------------|--------------------------|--------------------------|
| <input type="checkbox"/> |
| 1                        | 2                        | 3                        | 4                        | 5                        | 6                        |

15. If you answered yes, how much of a problem was this for you? (*tick one box*)

Not a problem at all Minor Problem Moderate Problem Major Problem

|                          |                          |                          |                          |
|--------------------------|--------------------------|--------------------------|--------------------------|
| <input type="checkbox"/> | <input type="checkbox"/> | <input type="checkbox"/> | <input type="checkbox"/> |
| 1                        | 2                        | 3                        | 4                        |

Did you experience the following problem in the 30-days after the biopsy procedure:

16. Erectile dysfunction, meaning the persistent inability to get and maintain an erection sufficient to allow satisfactory sexual performance

Yes  No   
1 2

17. If you answered yes, how long after the biopsy did you have this for? (*tick one*)

Days: 0-2 3-5 6-10 11-15 16-20 21-30

|                          |                          |                          |                          |                          |                          |
|--------------------------|--------------------------|--------------------------|--------------------------|--------------------------|--------------------------|
| <input type="checkbox"/> |
| 1                        | 2                        | 3                        | 4                        | 5                        | 6                        |

18. If you answered yes, how much of a problem was this for you? (*tick one box*)

Not a problem at all Minor Problem Moderate Problem Major Problem

|                          |                          |                          |                          |
|--------------------------|--------------------------|--------------------------|--------------------------|
| <input type="checkbox"/> | <input type="checkbox"/> | <input type="checkbox"/> | <input type="checkbox"/> |
| 1                        | 2                        | 3                        | 4                        |

15298

Did you experience the following problem in the 30-days after the biopsy procedure:

19. Urinary incontinence, meaning any undesired leakage of urine

Yes  No   
1 2

20. If you answered yes, how long after the biopsy did you have this for? (*tick one*)

Days: 0-2 3-5 6-10 11-15 16-20 21-30

|                          |                          |                          |                          |                          |                          |
|--------------------------|--------------------------|--------------------------|--------------------------|--------------------------|--------------------------|
| <input type="checkbox"/> |
| 1                        | 2                        | 3                        | 4                        | 5                        | 6                        |

21. If you answered yes, how much of a problem was this for you? (*tick one box*)

Not a problem at all Minor Problem Moderate Problem Major Problem

1 2 3 4

Did you experience the following problem in the 30-days after the biopsy procedure:

22. Urinary tract infection diagnosed by a healthcare professional

Yes  No   
1 2

23. If you answered yes, how long after the biopsy did this occur after? (*tick one*)

Days: 0-2 3-5 6-10 11-15 16-20 21-30

|                          |                          |                          |                          |                          |                          |
|--------------------------|--------------------------|--------------------------|--------------------------|--------------------------|--------------------------|
| <input type="checkbox"/> |
| 1                        | 2                        | 3                        | 4                        | 5                        | 6                        |

24. If you answered yes, how much of a problem was this for you? (*tick one box*)

Not a problem at all Minor Problem Moderate Problem Major Problem

1 2 3 4

Did you experience the following problem in the 30-days after the biopsy procedure:

25. Pain at the site where the biopsies were taken from

Yes  No   
1 2

26. If you answered yes, how long after the biopsy did you have this for? (*tick one*)

Days: 0-2 3-5 6-10 11-15 16-20 21-30

|                          |                          |                          |                          |                          |                          |
|--------------------------|--------------------------|--------------------------|--------------------------|--------------------------|--------------------------|
| <input type="checkbox"/> |
| 1                        | 2                        | 3                        | 4                        | 5                        | 6                        |

27. If you answered yes, how much of a problem was this for you? (*tick one box*)

Not a problem at all Minor Problem Moderate Problem Major Problem

1 2 3 4

15299

28. Please list any **new** medications that you have taken **since the biopsy**. Do not list your regular medications but do list any **new** medications started related to the biopsy. Think especially about any painkillers or antibiotics that you may have taken. Only list the medications if you have taken them. An example is given in the first box:

| Name of medication        | Dosage       | Number of doses per day | Number of days |
|---------------------------|--------------|-------------------------|----------------|
| <i>e.g. ciprofloxacin</i> | <i>500mg</i> | <i>2</i>                | <i>3</i>       |
|                           |              |                         |                |
|                           |              |                         |                |
|                           |              |                         |                |
|                           |              |                         |                |
|                           |              |                         |                |
|                           |              |                         |                |
|                           |              |                         |                |

29. Since the biopsy, have you had contacts with hospital services for reasons related to the biopsy, which were unplanned and not part of the routine study visits?

*Please answer yes if you have had any unplanned contact with any healthcare staff e.g. doctor, nurse, other. Please also answer yes if you have had any unplanned consultations with healthcare staff over the phone*

Yes

1

No

2

30. If yes, please answer describe:

(i) who the contact was with (*e.g. nurse/doctor/other*)

(ii) reason for contact (*e.g. concern over fevers*)

(iii) manner of contact (*e.g. telephone/attendance at outpatient clinic/attendance in accident and emergency*)

(iv) any treatment you received (please be as specific as possible *e.g. "I was admitted to the ward and treated for an infection of the blood stream for 5 days of intravenous antibiotics with 1.2g co-amoxiclav three times a day and I had 2 days of painkillers with intravenous paracetamol 1g four times a day"*):

15300

31. How many times, if any, have you attended the accident and emergency department?

32. How many nights, if any, have you been admitted to hospital as an inpatient?

33. How many days, if any, have you been admitted to a day ward in hospital without staying the night?

34. How many days, if any, have you been admitted to an intensive care unit for?

35. Since the biopsy, have you had contact with the community healthcare team for reasons related to the biopsy?

*Please answer yes if you have had any contact with any healthcare staff in the community e.g. GP, practice nurse, community nurse, other. Please also answer yes if you have had any consultations with community healthcare staff over the phone*

Yes

1

No

2

36. If yes, please answer describe:

(i) who the contact was with (e.g. nurse/doctor/other)

(ii) reason for contact (e.g. concern over fevers)

(iii) manner of contact (e.g. telephone/attendance at GP surgery/home visit)

(iv) any treatment you received (please be as specific as possible e.g. "I received 5 days of oral antibiotics for a urinary tract infection- 625mg co-amoxiclav three times a day and I had 2 days of painkillers with paracetamol 1g four times a day"):

15301

15302

37. Have you felt unwell in any other way that we have not asked that you feel is due to the biopsy?

Yes  
  
1

No  
  
2

38. If you answered yes, please describe:

39. If you answered yes, how long after the biopsy did you have this for? (*tick one*)

|                          |                          |                          |                          |                          |                          |
|--------------------------|--------------------------|--------------------------|--------------------------|--------------------------|--------------------------|
| Days: 0-2                | 3-5                      | 6-10                     | 11-15                    | 16-20                    | 21-30                    |
| <input type="checkbox"/> |
| 1                        | 2                        | 3                        | 4                        | 5                        | 6                        |

40. If you answered yes, how much of a problem was this for you? (*tick one box*)

Not a problem

at all  
  
1

Minor Problem

  
2

Moderate Problem

  
3

Major Problem

  
4

41. If **another biopsy** in the future was medically necessary, how much of a problem would it be for you to undergo the same procedure? (*tick one box*)

Not a problem

at all  
  
1

Minor Problem

  
2

Moderate Problem

  
3

Major Problem

  
4

?

?

**Thank you for completing the questionnaire. Please post the questionnaire in the pre-paid self-addressed envelope or give to the research team at your next visit. Please contact us if you have any queries.**

?

15303

15304

15305

15306
