# Supplementary material
Source: PubMed Central journal article supplement (PMC7863017)
Supplement: jamaoncol-e207589-s002.pdf [file jamaoncol-e207589-s002.pdf]

```

1   %let dir=W:/OCOG/PRECISION/data/May 2020/;
2
3   libname cwd 'W:/OCOG/PRECISION/data/May 2020/';
NOTE: Libref CWD was successfully assigned as follows:
      Engine:          V9
      Physical Name:  W:\OCOG\PRECISION\data\May 2020
4   libname cwd2 'W:/OCOG/PRECISION/data/Apr 2020/v2/';
NOTE: Libref CWD2 was successfully assigned as follows:
      Engine:          V9
      Physical Name:  W:\OCOG\PRECISION\data\Apr 2020\v2
5
6   OPTIONS FMTSEARCH=(cwd);
7   PROC FORMAT library = cwd;
8   ***** FORMATS DEFINITION SECTION - BEGINS *****;
9
10  VALUE T1086X
11     1 = 'Biopsy Negative'
12     2 = 'Biopsy Positive'
13     .A = 'Not Applicable'
14     .B = 'Flag'
15     .C = 'Missing';
NOTE: Format T1086X is already on the library CWD.FORMATS.
NOTE: Format T1086X has been written to CWD.FORMATS.
16  VALUE T1087X
17     1 = '<= 20 cc'
18     2 = '21 - 34 cc'
19     3 = '35 - 49 cc'
20     4 = '>= 50 cc'
21     .A = 'Not Applicable'
22     .B = 'Flag'
23     .C = 'Missing';
NOTE: Format T1087X is already on the library CWD.FORMATS.
NOTE: Format T1087X has been written to CWD.FORMATS.
24  VALUE T1167X
25     1 = 'For Cause'
26     2 = 'Suspicion'
27     3 = 'Other'

```

28 .A = 'Not Applicable'

29 .B = 'Flag'

30 .C = 'Missing';

NOTE: Format T1167X is already on the library CWD.FORMATS.

NOTE: Format T1167X has been written to CWD.FORMATS.

31 VALUE T1168X

32 1 = '0'

33 2 = '1'

34 3 = '2'

35 4 = '3'

36 5 = '>3'

37 .A = 'Not Applicable'

38 .B = 'Flag'

39 .C = 'Missing';

NOTE: Format T1168X is already on the library CWD.FORMATS.

NOTE: Format T1168X has been written to CWD.FORMATS.

40 VALUE T1187X

41 1 = '1 - Resolution of previous features suspicious on MRI'

42 2 = '2 - Reduction in volume and/or conspicuity of previous features suspicious on MRI'

43 3 = '3 - Stable MRI appearance: no new focal/diffuse lesions'

44 4 = '4 - Significant increase in size and/or conspicuity of features suspicious for prostate cancer'

45 5 = '5 - Definitive radiologic stage progression'

46 .A = 'Not Applicable'

47 .B = 'Flag'

48 .C = 'Missing';

NOTE: Format T1187X is already on the library CWD.FORMATS.

NOTE: Format T1187X has been written to CWD.FORMATS.

49 VALUE T190X

50 1 = '1 or Mild'

51 2 = '2 or Moderate'

52 3 = '3 or Severe'

53 4 = '4 or Life-threatening/disabling'

54 5 = '5 or Death'

55 .A = 'Not Applicable'

56 .B = 'Flag'

57 .C = 'Missing';

NOTE: Format T190X is already on the library CWD.FORMATS.

NOTE: Format T190X has been written to CWD.FORMATS.

58 VALUE T24X

59 1 = 'Completely resolved'

60 2 = 'Resolved with Sequelae'

61 3 = 'Chronic'

62 4 = 'Death'

63 .A = 'Not Applicable'

64 .B = 'Flag'

65 .C = 'Missing';

NOTE: Format T24X is already on the library CWD.FORMATS.

NOTE: Format T24X has been written to CWD.FORMATS.

66 VALUE T335X

67 1 = 'OD - once daily'

68 2 = 'QOD - every other day'

69 3 = 'BID - twice daily'

70 4 = 'TID - 3 times daily'

71 5 = 'QID - 4 times daily'

72 6 = 'QM - once a month'

73 7 = 'Q2M - every 2 months'

74 8 = 'Q3M - every 3 months'

75 9 = 'PRN - as needed'

76 .A = 'Not Applicable'

```
77      .B = 'Flag'
78      .C = 'Missing';
NOTE: Format T335X is already on the library CWD.FORMATS.
NOTE: Format T335X has been written to CWD.FORMATS.
79  VALUE T381X
80      1 = 'HGPIN'
81      2 = 'ASAP'
82      3 = 'Acute Inflammation'
83      4 = 'Chronic Inflammation'
84      5 = 'Acute & Chronic Inflammation'
85      6 = 'Other'
86      .A = 'Not Applicable'
87      .B = 'Flag'
88      .C = 'Missing';
NOTE: Format T381X is already on the library CWD.FORMATS.
NOTE: Format T381X has been written to CWD.FORMATS.
89  VALUE T437X
90      1 = 'Present'
91      2 = 'Absent'
92      3 = 'Not applicable'
93      .B = 'Flag'
94      .C = 'Missing';
NOTE: Format T437X is already on the library CWD.FORMATS.
NOTE: Format T437X has been written to CWD.FORMATS.
95  VALUE T510X
96      1 = 'Negative'
97      2 = 'Positive'
98      .A = 'Not Applicable'
99      .B = 'Flag'
100     .C = 'Missing';
NOTE: Format T510X is already on the library CWD.FORMATS.
NOTE: Format T510X has been written to CWD.FORMATS.
101  VALUE T512X
102     1 = 'Cancer'
103     2 = 'No Cancer'
104     3 = 'Equivocal'
105     .A = 'Not Applicable'
106     .B = 'Flag'
107     .C = 'Missing';
NOTE: Format T512X is already on the library CWD.FORMATS.
NOTE: Format T512X has been written to CWD.FORMATS.
108  VALUE T692X
109     1 = 'Adenocarcinoma'
110     2 = 'Other'
111     .A = 'Not Applicable'
112     .B = 'Flag'
113     .C = 'Missing';
NOTE: Format T692X is already on the library CWD.FORMATS.
NOTE: Format T692X has been written to CWD.FORMATS.
114  VALUE T702X
115     1 = 'Normal termination, study protocol completed'
116     2 = 'Early termination'
117     .A = 'Not Applicable'
118     .B = 'Flag'
119     .C = 'Missing';
NOTE: Format T702X is already on the library CWD.FORMATS.
NOTE: Format T702X has been written to CWD.FORMATS.
120  VALUE T749X
121     1 = 'No'
122     2 = 'Yes'
123     3 = 'Equivocal'
```

```
124     .A = 'Not Applicable'
125     .B = 'Flag'
126     .C = 'Missing';
NOTE: Format T749X is already on the library CWD.FORMATS.
NOTE: Format T749X has been written to CWD.FORMATS.
127 VALUE T756X
128     1 = 'No'
129     2 = 'Yes'
130     3 = 'Not applicable'
131     .B = 'Flag'
132     .C = 'Missing';
NOTE: Format T756X is already on the library CWD.FORMATS.
NOTE: Format T756X has been written to CWD.FORMATS.
133 VALUE T763X
134     1 = 'No'
135     2 = 'Yes'
136     3 = 'Not required'
137     .A = 'Not Applicable'
138     .B = 'Flag'
139     .C = 'Missing';
NOTE: Format T763X is already on the library CWD.FORMATS.
NOTE: Format T763X has been written to CWD.FORMATS.
140 VALUE T915X
141     1 = 'No'
142     2 = 'Yes, specify'
143     3 = 'Don`t know'
144     .A = 'Not Applicable'
145     .B = 'Flag'
146     .C = 'Missing';
NOTE: Format T915X is already on the library CWD.FORMATS.
NOTE: Format T915X has been written to CWD.FORMATS.
147 VALUE T918X
148     1 = 'Possible'
149     2 = 'Probable'
150     3 = 'Definitely'
151     .A = 'Not Applicable'
152     .B = 'Flag'
153     .C = 'Missing';
NOTE: Format T918X is already on the library CWD.FORMATS.
NOTE: Format T918X has been written to CWD.FORMATS.
154 VALUE T919X
155     1 = 'Progressive prostate cancer'
156     2 = 'Other cancer'
157     3 = 'Other cause'
158     4 = 'Unknown'
159     .A = 'Not Applicable'
160     .B = 'Flag'
161     .C = 'Missing';
NOTE: Format T919X is already on the library CWD.FORMATS.
NOTE: Format T919X has been written to CWD.FORMATS.
162 VALUE T923X
163     1 = 'Good'
164     2 = 'Minor image quality issues'
165     3 = 'Acceptable for diagnosis'
166     4 = 'Unacceptable'
167     .A = 'Not Applicable'
168     .B = 'Flag'
169     .C = 'Missing';
NOTE: Format T923X is already on the library CWD.FORMATS.
NOTE: Format T923X has been written to CWD.FORMATS.
170 VALUE T924X
```

```
171     1 = 'L'
172     2 = 'R'
173     .A = 'Not Applicable'
174     .B = 'Flag'
175     .C = 'Missing';
NOTE: Format T924X is already on the library CWD.FORMATS.
NOTE: Format T924X has been written to CWD.FORMATS.
176 VALUE T925X
177     1 = 'B'
178     2 = 'M'
179     3 = 'A'
180     .A = 'Not Applicable'
181     .B = 'Flag'
182     .C = 'Missing';
NOTE: Format T925X is already on the library CWD.FORMATS.
NOTE: Format T925X has been written to CWD.FORMATS.
183 VALUE T926X
184     1 = 'AS'
185     2 = 'TZa'
186     3 = 'TZp'
187     4 = 'CZ'
188     5 = 'PZa'
189     6 = 'PZpl'
190     7 = 'PZpm'
191     .A = 'Not Applicable'
192     .B = 'Flag'
193     .C = 'Missing';
NOTE: Format T926X is already on the library CWD.FORMATS.
NOTE: Format T926X has been written to CWD.FORMATS.
194 VALUE T927X
195     1 = 'Result of MpMRI is Negative (PIRADS 1,2) -> No Biopsy'
196     2 = 'Result of TRUS Biopsy'
197     3 = 'Result of MRI-targeted Biopsy'
198     .A = 'Not Applicable'
199     .B = 'Flag'
200     .C = 'Missing';
NOTE: Format T927X is already on the library CWD.FORMATS.
NOTE: Format T927X has been written to CWD.FORMATS.
201 VALUE T928X
202     1 = 'Systematic'
203     2 = 'Targeted only'
204     3 = 'Both Systematic and Targets'
205     .A = 'Not Applicable'
206     .B = 'Flag'
207     .C = 'Missing';
NOTE: Format T928X is already on the library CWD.FORMATS.
NOTE: Format T928X has been written to CWD.FORMATS.
208 VALUE T929X
209     1 = 'Radical prostatectomy'
210     2 = 'Radical radiotherapy'
211     .A = 'Not Applicable'
212     .B = 'Flag'
213     .C = 'Missing';
NOTE: Format T929X is already on the library CWD.FORMATS.
NOTE: Format T929X has been written to CWD.FORMATS.
214 VALUE T930X
215     1 = 'High intensity focused ultrasound'
216     2 = 'Cryotherapy'
217     .A = 'Not Applicable'
218     .B = 'Flag'
219     .C = 'Missing';
```

NOTE: Format T930X is already on the library CWD.FORMATS.

NOTE: Format T930X has been written to CWD.FORMATS.

```
220 VALUE T931X
221     1 = 'Systematic'
222     2 = 'Targeted only'
223     3 = 'Both Systematic and Targets'
224     4 = 'Not done because of negative mpMRI'
225     .A = 'Not Applicable'
226     .B = 'Flag'
227     .C = 'Missing';
```

NOTE: Format T931X is already on the library CWD.FORMATS.

NOTE: Format T931X has been written to CWD.FORMATS.

```
228 VALUE T932X
229     1 = 'Treatment completed for prostate cancer'
230     2 = 'Request by local investigator and/or principal investigator'
231     3 = 'Non-compliance with the requirements of the study'
232     4 = 'Death'
233     5 = 'Request by subject and withdrawal of subject`s consent'
234     6 = 'Subject develops progressive disease'
235     7 = 'Lost to follow-up'
236     8 = 'Other'
237     .A = 'Not Applicable'
238     .B = 'Flag'
239     .C = 'Missing';
```

NOTE: Format T932X is already on the library CWD.FORMATS.

NOTE: Format T932X has been written to CWD.FORMATS.

```
240 VALUE T933X
241     1 = '1 - External Beam - prostate only'
242     2 = '2 - External Beam - prostate and pelvis'
243     3 = '3 - Brachytherapy'
244     4 = '4 - Both external beam - prostate only and brachytherapy'
245     5 = '5 - HIFU'
246     6 = '6 - Other'
247     .A = 'Not Applicable'
248     .B = 'Flag'
249     .C = 'Missing';
```

NOTE: Format T933X is already on the library CWD.FORMATS.

NOTE: Format T933X has been written to CWD.FORMATS.

```
250 VALUE T934X
251     1 = 'Radical Prostatectomy'
252     2 = 'Other'
253     .A = 'Not Applicable'
254     .B = 'Flag'
255     .C = 'Missing';
```

NOTE: Format T934X is already on the library CWD.FORMATS.

NOTE: Format T934X has been written to CWD.FORMATS.

```
256 VALUE T935X
257     1 = 'High intensity focused ultrasound (HIFU)'
258     2 = 'Cryotherapy'
259     3 = 'Other'
260     .A = 'Not Applicable'
261     .B = 'Flag'
262     .C = 'Missing';
```

NOTE: Format T935X is already on the library CWD.FORMATS.

NOTE: Format T935X has been written to CWD.FORMATS.

```
263 VALUE T936X
264     1 = 'Cardiovascular'
265     2 = 'Respiratory'
266     3 = 'Gastrointestinal'
267     4 = 'Hepatic/Biliary'
268     5 = 'Genitourinary / Reproductive'
```

269 6 = 'Renal'  
270 7 = 'Endocrine / Metabolic'  
271 8 = 'Musculoskeletal'  
272 9 = 'Hematologic-Lymphatic'  
273 10 = 'Neurological / Psychiatric'  
274 11 = 'Dermatologic'  
275 12 = 'Immunologic'  
276 13 = 'Procedures and Surgeries'  
277 14 = 'Other'  
278 .A = 'Not Applicable'  
279 .B = 'Flag'  
280 .C = 'Missing';

NOTE: Format T936X is already on the library CWD.FORMATS.

NOTE: Format T936X has been written to CWD.FORMATS.

281 VALUE T938X

282 1 = 'I have no Probs in walking about'  
283 2 = 'I have slight Probs in walking about'  
284 3 = 'I have moderate Probs in walking about'  
285 4 = 'I have severe Probs in walking about'  
286 5 = 'I am unable to walk about'  
287 .A = 'Not Applicable'  
288 .B = 'Flag'  
289 .C = 'Missing';

NOTE: Format T938X is already on the library CWD.FORMATS.

NOTE: Format T938X has been written to CWD.FORMATS.

290 VALUE T939X

291 1 = 'I have no Probs washing or dressing myself'  
292 2 = 'I have slight Probs washing or dressing myself'  
293 3 = 'I have moderate Probs washing or dressing myself'  
294 4 = 'I have severe Probs washing or dressing myself'  
295 5 = 'I am unable to wash or dress myself'  
296 .A = 'Not Applicable'  
297 .B = 'Flag'  
298 .C = 'Missing';

NOTE: Format T939X is already on the library CWD.FORMATS.

NOTE: Format T939X has been written to CWD.FORMATS.

299 VALUE T940X

300 1 = 'I have no Probs doing my usual activities'  
301 2 = 'I have slight Probs doing my usual activities'  
302 3 = 'I have moderate Probs doing my usual activities'  
303 4 = 'I have severe Probs doing my usual activities'  
304 5 = 'I am unable to do my usual activities'  
305 .A = 'Not Applicable'  
306 .B = 'Flag'  
307 .C = 'Missing';

NOTE: Format T940X is already on the library CWD.FORMATS.

NOTE: Format T940X has been written to CWD.FORMATS.

308 VALUE T941X

309 1 = 'I have no pain or discomfort'  
310 2 = 'I have slight pain or discomfort'  
311 3 = 'I have moderate pain or discomfort'  
312 4 = 'I have severe pain or discomfort'  
313 5 = 'I have extreme pain or discomfort'  
314 .A = 'Not Applicable'  
315 .B = 'Flag'  
316 .C = 'Missing';

NOTE: Format T941X is already on the library CWD.FORMATS.

NOTE: Format T941X has been written to CWD.FORMATS.

317 VALUE T942X

318 1 = 'I am not anxious or depressed'  
319 2 = 'I am slightly anxious or depressed'

```
320     3 = 'I am moderately anxious or depressed'
321     4 = 'I am severely anxious or depressed'
322     5 = 'I am extremely anxious or depressed'
323     .A = 'Not Applicable'
324     .B = 'Flag'
325     .C = 'Missing';
NOTE: Format T942X is already on the library CWD.FORMATS.
NOTE: Format T942X has been written to CWD.FORMATS.
326 VALUE T943X
327     1 = '0 - 2'
328     2 = '3 - 5'
329     3 = '6 - 10'
330     4 = '11 - 15'
331     5 = '16 - 20'
332     6 = '21 - 30'
333     .A = 'Not Applicable'
334     .B = 'Flag'
335     .C = 'Missing';
NOTE: Format T943X is already on the library CWD.FORMATS.
NOTE: Format T943X has been written to CWD.FORMATS.
336 VALUE T944X
337     1 = 'Not a Prob at all'
338     2 = 'Minor Prob'
339     3 = 'Moderate Prob'
340     4 = 'Major Prob'
341     .A = 'Not Applicable'
342     .B = 'Flag'
343     .C = 'Missing';
NOTE: Format T944X is already on the library CWD.FORMATS.
NOTE: Format T944X has been written to CWD.FORMATS.
344 VALUE T945X
345     1 = 'African American'
346     2 = 'Asian'
347     3 = 'Caucasian'
348     4 = 'Hispanic'
349     5 = 'Other'
350     .A = 'Not Applicable'
351     .B = 'Flag'
352     .C = 'Missing';
NOTE: Format T945X is already on the library CWD.FORMATS.
NOTE: Format T945X has been written to CWD.FORMATS.
353 VALUE T946X
354     1 = 'Focal'
355     2 = 'Complete'
356     .A = 'Not Applicable'
357     .B = 'Flag'
358     .C = 'Missing';
NOTE: Format T946X is already on the library CWD.FORMATS.
NOTE: Format T946X has been written to CWD.FORMATS.
359 VALUE T947X
360     1 = 'Identified'
361     2 = 'Not Identified'
362     3 = 'N/A'
363     .A = 'Not Applicable'
364     .B = 'Flag'
365     .C = 'Missing';
NOTE: Format T947X is already on the library CWD.FORMATS.
NOTE: Format T947X has been written to CWD.FORMATS.
366 VALUE T948X
367     1 = 'HG PIN'
368     2 = 'ASAP'
```



```
369     3 = 'Not Applicable'
370     4 = 'Other'
371     .B = 'Flag'
372     .C = 'Missing';
NOTE: Format T948X is already on the library CWD.FORMATS.
NOTE: Format T948X has been written to CWD.FORMATS.
373 VALUE T954X
374     1 = 'Slight'
375     2 = 'Moderate'
376     3 = 'Gross'
377     .A = 'Not Applicable'
378     .B = 'Flag'
379     .C = 'Missing';
NOTE: Format T954X is already on the library CWD.FORMATS.
NOTE: Format T954X has been written to CWD.FORMATS.
380 VALUE T955X
381     1 = '<= 20 cc'
382     2 = '20 - 35 cc'
383     3 = '36 - 50 cc'
384     4 = '>= 50 cc'
385     .A = 'Not Applicable'
386     .B = 'Flag'
387     .C = 'Missing';
NOTE: Format T955X is already on the library CWD.FORMATS.
NOTE: Format T955X has been written to CWD.FORMATS.
388 VALUE T956X
389     1 = 'Normal, no palpable tumour'
390     2 = 'Abnormal, palpable nodule <= 1.5 cm'
391     3 = 'Abnormal, palpable nodule > 1.5 cm'
392     4 = 'Abnormal, palpable nodules both lobes'
393     .A = 'Not Applicable'
394     .B = 'Flag'
395     .C = 'Missing';
NOTE: Format T956X is already on the library CWD.FORMATS.
NOTE: Format T956X has been written to CWD.FORMATS.
396 VALUE T957X
397     1 = 'Bone Scan'
398     2 = 'CT'
399     3 = 'MRI'
400     4 = 'Other'
401     .A = 'Not Applicable'
402     .B = 'Flag'
403     .C = 'Missing';
NOTE: Format T957X is already on the library CWD.FORMATS.
NOTE: Format T957X has been written to CWD.FORMATS.
404 VALUE T958X
405     1 = 'Nurse'
406     2 = 'Doctor'
407     3 = 'Other'
408     .A = 'Not Applicable'
409     .B = 'Flag'
410     .C = 'Missing';
NOTE: Format T958X is already on the library CWD.FORMATS.
NOTE: Format T958X has been written to CWD.FORMATS.
411 VALUE T959X
412     1 = 'Telephone'
413     2 = 'Attendance at outpatient clinic'
414     3 = 'Attendance in accident and emergency'
415     4 = 'Other'
416     .A = 'Not Applicable'
417     .B = 'Flag'
```

```
418 .C = 'Missing';
NOTE: Format T959X is already on the library CWD.FORMATS.
NOTE: Format T959X has been written to CWD.FORMATS.
419 VALUE T960X
420 1 = 'Telephone'
421 2 = 'Attendance at GP surgery'
422 3 = 'Home visit'
423 4 = 'Other'
424 .A = 'Not Applicable'
425 .B = 'Flag'
426 .C = 'Missing';
NOTE: Format T960X is already on the library CWD.FORMATS.
NOTE: Format T960X has been written to CWD.FORMATS.
427 VALUE T962X
428 1 = 'Good'
429 2 = 'Minor image quality issues (still acceptable)'
430 3 = 'Unacceptable but some lesions seen warranting biopsy'
431 4 = 'Unacceptable, cannot interpret at all'
432 .A = 'Not Applicable'
433 .B = 'Flag'
434 .C = 'Missing';
NOTE: Format T962X is already on the library CWD.FORMATS.
NOTE: Format T962X has been written to CWD.FORMATS.
435 VALUE T963X
436 1 = 'No (Pi-Rads 1, 2)'
437 2 = 'Yes (Pi-Rads 3, 4 or 5)'
438 .A = 'Not Applicable'
439 .B = 'Flag'
440 .C = 'Missing';
NOTE: Format T963X is already on the library CWD.FORMATS.
NOTE: Format T963X has been written to CWD.FORMATS.
441 VALUE T965X
442 1 = '1 - none'
443 2 = '2 - con med'
444 3 = '3 - diagnostic test'
445 4 = '4 - other'
446 .A = 'Not Applicable'
447 .B = 'Flag'
448 .C = 'Missing';
NOTE: Format T965X is already on the library CWD.FORMATS.
NOTE: Format T965X has been written to CWD.FORMATS.
449 VALUE T966X
450 1 = 'Yes'
451 2 = 'No'
452 .A = 'Not Applicable'
453 .B = 'Flag'
454 .C = 'Missing';
NOTE: Format T966X is already on the library CWD.FORMATS.
NOTE: Format T966X has been written to CWD.FORMATS.
455 VALUE T967X
456 1 = 'mg'
457 2 = 'tablet'
458 3 = 'capsule'
459 4 = 'unit'
460 5 = 'drop'
461 6 = 'other'
462 .A = 'Not Applicable'
463 .B = 'Flag'
464 .C = 'Missing';
NOTE: Format T967X is already on the library CWD.FORMATS.
NOTE: Format T967X has been written to CWD.FORMATS.
```

```

465 VALUE T979X
466     1 = 'T1a'
467     2 = 'T1b'
468     3 = 'T1c'
469     4 = 'T1d'
470     5 = 'T2a'
471     6 = 'T2b'
472     7 = 'T2c'
473     8 = 'T2d'
474     9 = 'T3a'
475    10 = 'T3b'
476    11 = 'T3c'
477    12 = 'T3d'
478    13 = 'Unknown'
479    14 = 'Not Available'
480     .A = 'Not Applicable'
481     .B = 'Flag'
482     .C = 'Missing';
NOTE: Format T979X is already on the library CWD.FORMATS.
NOTE: Format T979X has been written to CWD.FORMATS.
483 VALUE T980X
484     1 = 'Left'
485     2 = 'Right'
486     3 = 'Unk'
487     .A = 'Not Applicable'
488     .B = 'Flag'
489     .C = 'Missing';
NOTE: Format T980X is already on the library CWD.FORMATS.
NOTE: Format T980X has been written to CWD.FORMATS.
490 VALUE T981X
491     1 = 'Lateral'
492     2 = 'Medial'
493     3 = 'Unk'
494     .A = 'Not Applicable'
495     .B = 'Flag'
496     .C = 'Missing';
NOTE: Format T981X is already on the library CWD.FORMATS.
NOTE: Format T981X has been written to CWD.FORMATS.
497 VALUE T982X
498     1 = 'Base'
499     2 = 'Mid'
500     3 = 'Apex'
501     4 = 'Unk'
502     .A = 'Not Applicable'
503     .B = 'Flag'
504     .C = 'Missing';
NOTE: Format T982X is already on the library CWD.FORMATS.
NOTE: Format T982X has been written to CWD.FORMATS.
505 VALUE Q1X
506     .A = ' '
507     1 = 'No'
508     2 = 'Yes';
NOTE: Format Q1X is already on the library CWD.FORMATS.
NOTE: Format Q1X has been written to CWD.FORMATS.
509 VALUE Q41X
510     .A = ' '
511     1 = '5% to 25%'
512     2 = '> 25%';
NOTE: Format Q41X is already on the library CWD.FORMATS.
NOTE: Format Q41X has been written to CWD.FORMATS.
513 VALUE dates3m

```

```

514     low-high = [date9.]
515     .A = 'N/A'
516     .B = 'Flag'
517     .C = 'Missing';
NOTE: Format DATES3M is already on the library CWD.FORMATS.
NOTE: Format DATES3M has been written to CWD.FORMATS.
518 VALUE times3m
519     low-high = [hhmm5.]
520     .A = 'N/A'
521     .B = 'Flag'
522     .C = 'Missing';
NOTE: Format TIMES3M is already on the library CWD.FORMATS.
NOTE: Format TIMES3M has been written to CWD.FORMATS.
523 VALUE noyes3m
524     1 = 'No'
525     2 = 'Yes'
526     .A = 'N/A'
527     .B = 'Flag'
528     .C = 'Missing';
NOTE: Format NOYES3M is already on the library CWD.FORMATS.
NOTE: Format NOYES3M has been written to CWD.FORMATS.
529 VALUE missing
530     low-high = [8.2]
531     .A = 'N/A'
532     .B = 'Flag'
533     .C = 'Missing';
NOTE: Format MISSING is already on the library CWD.FORMATS.
NOTE: Format MISSING has been written to CWD.FORMATS.
534 VALUE chkd3m
535     1 = 'Not checked'
536     2 = 'Checked'
537     .A = 'N/A'
538     .B = 'Flag'
539     .C = 'Missing';
NOTE: Format CHKD3M is already on the library CWD.FORMATS.
NOTE: Format CHKD3M has been written to CWD.FORMATS.
540 VALUE truefals
541     1 = 'False'
542     2 = 'True'
543     .A = 'N/A'
544     .B = 'Flag'
545     .C = 'Missing';
NOTE: Format TRUEFALS is already on the library CWD.FORMATS.
NOTE: Format TRUEFALS has been written to CWD.FORMATS.
546 RUN;

NOTE: PROCEDURE FORMAT used (Total process time):
      real time           0.17 seconds
      cpu time            0.15 seconds

547
548 ***** DATA INPUT SECTION - BEGINS *****;
549
550 DATA eq5d;
551     set cwd.EQ5D;
552 INFILE "&dir.PRECISE_EQ5D.dat" LRECL=468 DSD DLM='^';
553 MISSING A B C;
554 INPUT
555 VisitCRFID : 10.
556 PID : 8.

```

```
557 PINIT : $10.
558 VDate : date9.
559 VNum : 8.
560 VType : $50.
561 DocVer : 8.
562 TrtCode : 8.
563 TrtDesc : $250.
564 StratumCode : 8.
565 StratumDesc : $250.
566 RegDate : date9.
567 CentreCode : 8.
568 CentreName : $250.
569 DocReceivedDate : date9.
570 DocEnteredDate : date9.
571 QuestCompletedDate : date9.
572 CompletedQuest : 8.
573 NotCompleteSpecify : $250.
574 Mobility : 8.
575 SelfCare : 8.
576 UsualActivities : 8.
577 PainDiscomfort : 8.
578 AnxietyDepression : 8.
579 StateOfHealthScore : 12.2
580 CRFComment : $250.
581 ;
582 FORMAT
583 VDATE date9.
584 REGDATE date9.
585 DOCRECEIVEDDATE date9.
586 DOCENTEREDDATE date9.
587 QuestCompletedDate dates3m9.
588 CompletedQuest T966X.
589 Mobility T938X.
590 SelfCare T939X.
591 UsualActivities T940X.
592 PainDiscomfort T941X.
593 AnxietyDepression T942X.
594 StateOfHealthScore missing7.
595 ;
596 LABEL
597 VisitCRFID = 'VisitCRFID'
598 PID = 'Patient ID'
599 PINIT = 'Patient Initials'
600 VDate = 'Visit Date'
601 VNum = 'Visit Number'
602 VType = 'Visit Type'
603 Docver = 'Document Version'
604 TrtCode = 'Treatment Code'
605 TrtDesc = 'Treatment Description'
606 StratumCode = 'Stratum Code'
607 StratumDesc = 'Stratum Description'
608 RegDate = 'Registration Date'
609 CentreCode = 'Centre Code'
610 CentreName = 'Centre Name'
611 DocReceivedDate = 'Document Received Date'
612 DocEnteredDate = 'Document Entered Date'
613 QuestCompletedDate = 'QuestCompletedDate'
614 CompletedQuest = 'CompletedQuest'
615 NotCompleteSpecify = 'NotCompleteSpecify'
616 Mobility = 'Mobility'
617 SelfCare = 'SelfCare'
```

```
618 UsualActivities = 'UsualActivities'
619 PainDiscomfort = 'PainDiscomfort'
620 AnxietyDepression = 'AnxietyDepression'
621 StateOfHealthScore = 'StateOfHealthScore'
622 CRFComment = 'CRFComment'
623 ;
624 RUN;
```

NOTE: The infile "W:/OCOG/PRECISION/data/May 2020/PRECISE\_EQ5D.dat" is:  
Filename=W:\OCOG\PRECISION\data\May 2020\PRECISE\_EQ5D.dat,  
RECFM=V,LRECL=468,File Size (bytes)=293100,  
Last Modified=07May2020:11:51:49,  
Create Time=07May2020:11:51:49

NOTE: 1095 records were read from the infile "W:/OCOG/PRECISION/data/May 2020/PRECISE\_EQ5D.dat".

The minimum record length was 217.

The maximum record length was 468.

NOTE: There were 1095 observations read from the data set CWD.EQ5D.

NOTE: The data set WORK.EQ5D has 1095 observations and 26 variables.

NOTE: DATA statement used (Total process time):

real time                   0.10 seconds

cpu time                    0.07 seconds

```
625
626 DATA qimmpb;
627     set cwd.QIMMPB;
628 INFILE "&dir.PRECISE_QIMMPB.dat" LRECL=410 DSD DLM='^';
629 MISSING A B C;
630 INPUT
631 VisitCRFID : 10.
632 PID : 8.
633 PINIT : $10.
634 VDate : date9.
635 VNum : 8.
636 VType : $50.
637 DocVer : 8.
638 TrtCode : 8.
639 TrtDesc : $250.
640 StratumCode : 8.
641 StratumDesc : $250.
642 RegDate : date9.
643 CentreCode : 8.
644 CentreName : $250.
645 DocReceivedDate : date9.
646 DocEnteredDate : date9.
647 QuestCompletedDate : date9.
648 BiopsyDate : date9.
649 CompletedQuest : 8.
650 NotCompleteSpecify : $250.
651 Discomfort : 12.2
652 Pain : 12.2
653 Fevers : 8.
654 BloodUrine : 8.
655 BloodSemen : 8.
656 BloodStool : 8.
657 AcuteUrinaryRetention : 8.
658 ErectileDysfunction : 8.
659 UrinaryIncontinence : 8.
660 UrinaryTractInfection : 8.
```

```

661 PainBiopsiesTaken : 8.
662 CRFComment : $250.
663 ;
664 FORMAT
665 VDATE date9.
666 REGDATE date9.
667 DOCRECEIVEDDATE date9.
668 DOCENTEREDDATE date9.
669 QuestCompletedDate dates3m9.
670 BiopsyDate dates3m9.
671 CompletedQuest T966X.
672 Discomfort missing7.
673 Pain missing7.
674 Fevers T966X.
675 BloodUrine T966X.
676 BloodSemen T966X.
677 BloodStool T966X.
678 AcuteUrinaryRetention T966X.
679 ErectileDysfunction T966X.
680 UrinaryIncontinence T966X.
681 UrinaryTractInfection T966X.
682 PainBiopsiesTaken T966X.
683 ;
684 LABEL
685 VisitCRFID = 'VisitCRFID'
686 PID = 'Patient ID'
687 PINIT = 'Patient Initials'
688 VDate = 'Visit Date'
689 VNum = 'Visit Number'
690 VType = 'Visit Type'
691 Docver = 'Document Version'
692 TrtCode = 'Treatment Code'
693 TrtDesc = 'Treatment Description'
694 StratumCode = 'Stratum Code'
695 StratumDesc = 'Stratum Description'
696 RegDate = 'Registration Date'
697 CentreCode = 'Centre Code'
698 CentreName = 'Centre Name'
699 DocReceivedDate = 'Document Received Date'
700 DocEnteredDate = 'Document Entered Date'
701 QuestCompletedDate = 'QuestCompletedDate'
702 BiopsyDate = 'BiopsyDate'
703 CompletedQuest = 'CompletedQuest'
704 NotCompleteSpecify = 'NotCompleteSpecify'
705 Discomfort = 'Discomfort'
706 Pain = 'Pain'
707 Fevers = 'Fevers'
708 BloodUrine = 'BloodUrine'
709 BloodSemen = 'BloodSemen'
710 BloodStool = 'BloodStool'
711 AcuteUrinaryRetention = 'AcuteUrinaryRetention'
712 ErectileDysfunction = 'ErectileDysfunction'
713 UrinaryIncontinence = 'UrinaryIncontinence'
714 UrinaryTractInfection = 'UrinaryTractInfection'
715 PainBiopsiesTaken = 'PainBiopsiesTaken'
716 CRFComment = 'CRFComment'
717 ;
718 RUN;

```

NOTE: The infile "W:/OCOG/PRECISION/data/May 2020/PRECISE\_QIMMPB.dat" is:  
 Filename=W:\OCOG\PRECISION\data\May 2020\PRECISE\_QIMMPB.dat,

RECFM=V,LRECL=410,File Size (bytes)=96801,  
Last Modified=07May2020:11:51:49,  
Create Time=07May2020:11:51:49

NOTE: 339 records were read from the infile "W:/OCOG/PRECISION/data/May  
2020/PRECISE\_QIMMPB.dat".

The minimum record length was 240.

The maximum record length was 410.

NOTE: There were 339 observations read from the data set CWD.QIMMPB.

NOTE: The data set WORK.QIMMPB has 339 observations and 32 variables.

NOTE: DATA statement used (Total process time):

real time 0.06 seconds

cpu time 0.04 seconds

```
719
720 DATA q30dpb;
721     set cwd.Q30DPB;
722 INFILE "&dir.PRECISE_Q30DPB.dat" LRECL=586 DSD DLM='^';
723 MISSING A B C;
724 INPUT
725 VisitCRFID : 10.
726 PID : 8.
727 PINIT : $10.
728 VDate : date9.
729 VNum : 8.
730 VType : $50.
731 DocVer : 8.
732 TrtCode : 8.
733 TrtDesc : $250.
734 StratumCode : 8.
735 StratumDesc : $250.
736 RegDate : date9.
737 CentreCode : 8.
738 CentreName : $250.
739 DocReceivedDate : date9.
740 DocEnteredDate : date9.
741 QuestCompletedDate : date9.
742 BiopsyDate : date9.
743 CompletedQuest : 8.
744 NotCompleteSpecify : $250.
745 Fevers : 8.
746 Fever0_2 : 8.
747 Fever3_5 : 8.
748 Fever6_10 : 8.
749 Fever11_15 : 8.
750 Fever16_20 : 8.
751 Fever21_30 : 8.
752 FeversSpecifyProb : 8.
753 BloodUrine : 8.
754 BloodUrine0_2 : 8.
755 BloodUrine3_5 : 8.
756 BloodUrine6_10 : 8.
757 BloodUrine11_15 : 8.
758 BloodUrine16_20 : 8.
759 BloodUrine21_30 : 8.
760 BloodUrineSpecifyProb : 8.
761 BloodSemen : 8.
762 BloodSemen0_2 : 8.
763 BloodSemen3_5 : 8.
764 BloodSemen6_10 : 8.
```



765 BloodSemen11\_15 : 8.  
766 BloodSemen16\_20 : 8.  
767 BloodSemen21\_30 : 8.  
768 BloodSemenSpecifyProb : 8.  
769 BloodStool : 8.  
770 BloodStoolSpecifyDays : 8.  
771 BloodStoolSpecifyProb : 8.  
772 AcuteUrinaryRetention : 8.  
773 AcuteUrinaryRetentionSpecifyDays : 8.  
774 AcuteUrinaryRetentionSpecifyProb : 8.  
775 ErectileDysfunction : 8.  
776 ErectileDysfunctionSpecifyDays : 8.  
777 ErectileDysfunctionSpecifyProble : 8.  
778 UrinaryIncontinence : 8.  
779 UrinaryIncontinenceSpecifyDays : 8.  
780 UrinaryIncontinenceSpecifyProble : 8.  
781 UrinaryTractInfection : 8.  
782 UrinaryTractInfectionSpecifyDays : 8.  
783 UrinaryTractInfectionSpecifyProb : 8.  
784 PainBiopsiesTaken : 8.  
785 PainBiopsiesTakenSpecifyDays : 8.  
786 PainBiopsiesTakenSpecifyProb : 8.  
787 UnplannedHospitalVisit : 8.  
788 NumAttendedER : 12.2  
789 NightsAdmittedInpatient : 12.2  
790 DaysAdmittedDayWard : 12.2  
791 DaysAdmittedICU : 12.2  
792 CommunityHealthcareVisit : 8.  
793 FeltUnwell : 8.  
794 FeltUnwellSpecify : \$250.  
795 FeltUnwellSpecifyDays : 8.  
796 FeltUnwellSpecifyProb : 8.  
797 AnotherBiopsy : 8.  
798 CRFComment : \$250.  
799 ;  
800 FORMAT  
801 VDATE date9.  
802 REGDATE date9.  
803 DOCRECEIVEDDATE date9.  
804 DOCENTEREDDATE date9.  
805 QuestCompletedDate dates3m9.  
806 BiopsyDate dates3m9.  
807 CompletedQuest T966X.  
808 Fevers T966X.  
809 Fever0\_2 truefals7.  
810 Fever3\_5 truefals7.  
811 Fever6\_10 truefals7.  
812 Fever11\_15 truefals7.  
813 Fever16\_20 truefals7.  
814 Fever21\_30 truefals7.  
815 FeversSpecifyProb T944X.  
816 BloodUrine T966X.  
817 BloodUrine0\_2 truefals7.  
818 BloodUrine3\_5 truefals7.  
819 BloodUrine6\_10 truefals7.  
820 BloodUrine11\_15 truefals7.  
821 BloodUrine16\_20 truefals7.  
822 BloodUrine21\_30 truefals7.  
823 BloodUrineSpecifyProb T944X.  
824 BloodSemen T966X.  
825 BloodSemen0\_2 truefals7.

```
826 BloodSemen3_5 truefals7.
827 BloodSemen6_10 truefals7.
828 BloodSemen11_15 truefals7.
829 BloodSemen16_20 truefals7.
830 BloodSemen21_30 truefals7.
831 BloodSemenSpecifyProb T944X.
832 BloodStool T966X.
833 BloodStoolSpecifyDays T943X.
834 BloodStoolSpecifyProb T944X.
835 AcuteUrinaryRetention T966X.
836 AcuteUrinaryRetentionSpecifyDays T943X.
837 AcuteUrinaryRetentionSpecifyProb T944X.
838 ErectileDysfunction T966X.
839 ErectileDysfunctionSpecifyDays T943X.
840 ErectileDysfunctionSpecifyProble T944X.
841 UrinaryIncontinence T966X.
842 UrinaryIncontinenceSpecifyDays T943X.
843 UrinaryIncontinenceSpecifyProble T944X.
844 UrinaryTractInfection T966X.
845 UrinaryTractInfectionSpecifyDays T943X.
846 UrinaryTractInfectionSpecifyProb T944X.
847 PainBiopsiesTaken T966X.
848 PainBiopsiesTakenSpecifyDays T943X.
849 PainBiopsiesTakenSpecifyProb T944X.
850 UnplannedHospitalVisit T966X.
851 NumAttendedER missing7.
852 NightsAdmittedInpatient missing7.
853 DaysAdmittedDayWard missing7.
854 DaysAdmittedICU missing7.
855 CommunityHealthcareVisit T966X.
856 FeltUnwell T966X.
857 FeltUnwellSpecifyDays T943X.
858 FeltUnwellSpecifyProb T944X.
859 AnotherBiopsy T944X.
860 ;
861 LABEL
862 VisitCRFID = 'VisitCRFID'
863 PID = 'Patient ID'
864 PINIT = 'Patient Initials'
865 VDate = 'Visit Date'
866 VNum = 'Visit Number'
867 VType = 'Visit Type'
868 Docver = 'Document Version'
869 TrtCode = 'Treatment Code'
870 TrtDesc = 'Treatment Description'
871 StratumCode = 'Stratum Code'
872 StratumDesc = 'Stratum Description'
873 RegDate = 'Registration Date'
874 CentreCode = 'Centre Code'
875 CentreName = 'Centre Name'
876 DocReceivedDate = 'Document Received Date'
877 DocEnteredDate = 'Document Entered Date'
878 QuestCompletedDate = 'QuestCompletedDate'
879 BiopsyDate = 'BiopsyDate'
880 CompletedQuest = 'CompletedQuest'
881 NotCompleteSpecify = 'NotCompleteSpecify'
882 Fevers = 'Fevers'
883 Fever0_2 = 'Fever0_2'
884 Fever3_5 = 'Fever3_5'
885 Fever6_10 = 'Fever6_10'
886 Fever11_15 = 'Fever11_15'
```

```

887 Fever16_20 = 'Fever16_20'
888 Fever21_30 = 'Fever21_30'
889 FeversSpecifyProb = 'FeversSpecifyProb'
890 BloodUrine = 'BloodUrine'
891 BloodUrine0_2 = 'BloodUrine0_2'
892 BloodUrine3_5 = 'BloodUrine3_5'
893 BloodUrine6_10 = 'BloodUrine6_10'
894 BloodUrine11_15 = 'BloodUrine11_15'
895 BloodUrine16_20 = 'BloodUrine16_20'
896 BloodUrine21_30 = 'BloodUrine21_30'
897 BloodUrineSpecifyProb = 'BloodUrineSpecifyProb'
898 BloodSemen = 'BloodSemen'
899 BloodSemen0_2 = 'BloodSemen0_2'
900 BloodSemen3_5 = 'BloodSemen3_5'
901 BloodSemen6_10 = 'BloodSemen6_10'
902 BloodSemen11_15 = 'BloodSemen11_15'
903 BloodSemen16_20 = 'BloodSemen16_20'
904 BloodSemen21_30 = 'BloodSemen21_30'
905 BloodSemenSpecifyProb = 'BloodSemenSpecifyProb'
906 BloodStool = 'BloodStool'
907 BloodStoolSpecifyDays = 'BloodStoolSpecifyDays'
908 BloodStoolSpecifyProb = 'BloodStoolSpecifyProb'
909 AcuteUrinaryRetention = 'AcuteUrinaryRetention'
910 AcuteUrinaryRetentionSpecifyDays = 'AcuteUrinaryRetentionSpecifyDays'
911 AcuteUrinaryRetentionSpecifyProb = 'AcuteUrinaryRetentionSpecifyProb'
912 ErectileDysfunction = 'ErectileDysfunction'
913 ErectileDysfunctionSpecifyDays = 'ErectileDysfunctionSpecifyDays'
914 ErectileDysfunctionSpecifyProble = 'ErectileDysfunctionSpecifyProb'
915 UrinaryIncontinence = 'UrinaryIncontinence'
916 UrinaryIncontinenceSpecifyDays = 'UrinaryIncontinenceSpecifyDays'
917 UrinaryIncontinenceSpecifyProble = 'UrinaryIncontinenceSpecifyProb'
918 UrinaryTractInfection = 'UrinaryTractInfection'
919 UrinaryTractInfectionSpecifyDays = 'UrinaryTractInfectionSpecifyDays'
920 UrinaryTractInfectionSpecifyProb = 'UrinaryTractInfectionSpecifyProb'
921 PainBiopsiesTaken = 'PainBiopsiesTaken'
922 PainBiopsiesTakenSpecifyDays = 'PainBiopsiesTakenSpecifyDays'
923 PainBiopsiesTakenSpecifyProb = 'PainBiopsiesTakenSpecifyProb'
924 UnplannedHospitalVisit = 'UnplannedHospitalVisit'
925 NumAttendedER = 'NumAttendedER'
926 NightsAdmittedInpatient = 'NightsAdmittedInpatient'
927 DaysAdmittedDayWard = 'DaysAdmittedDayWard'
928 DaysAdmittedICU = 'DaysAdmittedICU'
929 CommunityHealthcareVisit = 'CommunityHealthcareVisit'
930 FeltUnwell = 'FeltUnwell'
931 FeltUnwellSpecify = 'FeltUnwellSpecify'
932 FeltUnwellSpecifyDays = 'FeltUnwellSpecifyDays'
933 FeltUnwellSpecifyProb = 'FeltUnwellSpecifyProb'
934 AnotherBiopsy = 'AnotherBiopsy'
935 CRFComment = 'CRFComment'
936 ;
937 RUN;

```

NOTE: The infile "W:/OCOG/PRECISION/data/May 2020/PRECISE\_Q30DPB.dat" is:  
 Filename=W:\OCOG\PRECISION\data\May 2020\PRECISE\_Q30DPB.dat,  
 RECFM=V,LRECL=586,File Size (bytes)=128127,  
 Last Modified=07May2020:11:51:49,  
 Create Time=07May2020:11:51:49

NOTE: 337 records were read from the infile "W:/OCOG/PRECISION/data/May 2020/PRECISE\_Q30DPB.dat".  
 The minimum record length was 339.

The maximum record length was 584.

NOTE: There were 337 observations read from the data set CWD.Q30DPB.

NOTE: The data set WORK.Q30DPB has 337 observations and 76 variables.

NOTE: DATA statement used (Total process time):

|           |              |
|-----------|--------------|
| real time | 0.12 seconds |
| cpu time  | 0.11 seconds |

```
938
939 DATA q30dpb1;
940   set cwd.Q30DPB1;
941   INFILE "&dir.PRECISE_Q30DPB1.dat" LRECL=317 DSD DLM='^';
942   MISSING A B C;
943   INPUT
944   VisitCRFID : 10.
945   PID : 8.
946   PINIT : $10.
947   VDate : date9.
948   VNum : 8.
949   VType : $50.
950   DocVer : 8.
951   TrtCode : 8.
952   TrtDesc : $250.
953   StratumCode : 8.
954   StratumDesc : $250.
955   RegDate : date9.
956   CentreCode : 8.
957   CentreName : $250.
958   DocReceivedDate : date9.
959   DocEnteredDate : date9.
960   RowNum : $50.
961   NumDosesPerDay : 12.2
962   MedName : $250.
963   NumDays : 12.2
964   Dosage : $250.
965   ;
966   FORMAT
967   VDATE date9.
968   REGDATE date9.
969   DOCRECEIVEDDATE date9.
970   DOCENTEREDDATE date9.
971   RowNum $50.
972   NumDosesPerDay missing7.
973   NumDays missing7.
974   ;
975   LABEL
976   VisitCRFID = 'VisitCRFID'
977   PID = 'Patient ID'
978   PINIT = 'Patient Initials'
979   VDate = 'Visit Date'
980   VNum = 'Visit Number'
981   VType = 'Visit Type'
982   Docver = 'Document Version'
983   TrtCode = 'Treatment Code'
984   TrtDesc = 'Treatment Description'
985   StratumCode = 'Stratum Code'
986   StratumDesc = 'Stratum Description'
987   RegDate = 'Registration Date'
988   CentreCode = 'Centre Code'
989   CentreName = 'Centre Name'
990   DocReceivedDate = 'Document Received Date'
```

```
991 DocEnteredDate = 'Document Entered Date'
992 RowNum = 'RowNum'
993 NumDosesPerDay = 'NumDosesPerDay'
994 MedName = 'MedName'
995 NumDays = 'NumDays'
996 Dosage = 'Dosage'
997 ;
998 RUN;
```

NOTE: The infile "W:/OCOG/PRECISION/data/May 2020/PRECISE\_Q30DPB1.dat" is:  
Filename=W:\OCOG\PRECISION\data\May 2020\PRECISE\_Q30DPB1.dat,  
RECFM=V,LRECL=317,File Size (bytes)=79848,  
Last Modified=07May2020:11:51:49,  
Create Time=07May2020:11:51:49

NOTE: 279 records were read from the infile "W:/OCOG/PRECISION/data/May 2020/PRECISE\_Q30DPB1.dat".

The minimum record length was 244.

The maximum record length was 317.

One or more lines were truncated.

NOTE: There were 279 observations read from the data set CWD.Q30DPB1.

NOTE: The data set WORK.Q30DPB1 has 279 observations and 21 variables.

NOTE: DATA statement used (Total process time):

real time 0.06 seconds

cpu time 0.03 seconds

```
999
1000 DATA q30dpb2;
1001     set cwd.Q30DPB2;
1002 INFILE "&dir.PRECISE_Q30DPB2.dat" LRECL=426 DSD DLM='^';
1003 MISSING A B C;
1004 INPUT
1005 VisitCRFID : 10.
1006 PID : 8.
1007 PINIT : $10.
1008 VDate : date9.
1009 VNum : 8.
1010 VType : $50.
1011 DocVer : 8.
1012 TrtCode : 8.
1013 TrtDesc : $250.
1014 StratumCode : 8.
1015 StratumDesc : $250.
1016 RegDate : date9.
1017 CentreCode : 8.
1018 CentreName : $250.
1019 DocReceivedDate : date9.
1020 DocEnteredDate : date9.
1021 RowNum : $50.
1022 HOthContactMannerSpecify : $250.
1023 HOthContactSpecify : $250.
1024 HContactManner : 8.
1025 HContact : 8.
1026 HContactReason : $250.
1027 HTreatmentReceived : $250.
1028 ;
1029 FORMAT
1030 VDATE date9.
1031 REGDATE date9.
1032 DOCRECEIVEDDATE date9.
```

```

1033 DOCENTEREDDATE date9.
1034 RowNum $50.
1035 HContactManner T959X.
1036 HContact T958X.
1037 ;
1038 LABEL
1039 VisitCRFID = 'VisitCRFID'
1040 PID = 'Patient ID'
1041 PINIT = 'Patient Initials'
1042 VDate = 'Visit Date'
1043 VNum = 'Visit Number'
1044 VType = 'Visit Type'
1045 Docver = 'Document Version'
1046 TrtCode = 'Treatment Code'
1047 TrtDesc = 'Treatment Description'
1048 StratumCode = 'Stratum Code'
1049 StratumDesc = 'Stratum Description'
1050 RegDate = 'Registration Date'
1051 CentreCode = 'Centre Code'
1052 CentreName = 'Centre Name'
1053 DocReceivedDate = 'Document Received Date'
1054 DocEnteredDate = 'Document Entered Date'
1055 RowNum = 'RowNum'
1056 HOthContactMannerSpecify = 'HOthContactMannerSpecify'
1057 HOthContactSpecify = 'HOthContactSpecify'
1058 HContactManner = 'HContactManner'
1059 HContact = 'HContact'
1060 HContactReason = 'HContactReason'
1061 HTreatmentReceived = 'HTreatmentReceived'
1062 ;
1063 RUN;

```

NOTE: The infile "W:/OCOG/PRECISION/data/May 2020/PRECISE\_Q30DPB2.dat" is:  
 Filename=W:\OCOG\PRECISION\data\May 2020\PRECISE\_Q30DPB2.dat,  
 RECFM=V,LRECL=426,File Size (bytes)=102748,  
 Last Modified=07May2020:11:51:49,  
 Create Time=07May2020:11:51:49

NOTE: 338 records were read from the infile "W:/OCOG/PRECISION/data/May 2020/PRECISE\_Q30DPB2.dat".

The minimum record length was 268.  
 The maximum record length was 426.  
 One or more lines were truncated.

NOTE: There were 338 observations read from the data set CWD.Q30DPB2.  
 NOTE: The data set WORK.Q30DPB2 has 338 observations and 23 variables.

NOTE: DATA statement used (Total process time):  
 real time 0.06 seconds  
 cpu time 0.03 seconds

```

1064
1065 DATA q30dpb3;
1066     set cwd.Q30DPB3;
1067 INFILE "&dir.PRECISE_Q30DPB3.dat" LRECL=402 DSD DLM='^';
1068 MISSING A B C;
1069 INPUT
1070 VisitCRFID : 10.
1071 PID : 8.
1072 PINIT : $10.
1073 VDate : date9.
1074 VNum : 8.

```

```

1075 VType : $50.
1076 DocVer : 8.
1077 TrtCode : 8.
1078 TrtDesc : $250.
1079 StratumCode : 8.
1080 StratumDesc : $250.
1081 RegDate : date9.
1082 CentreCode : 8.
1083 CentreName : $250.
1084 DocReceivedDate : date9.
1085 DocEnteredDate : date9.
1086 RowNum : $50.
1087 COthContactSpecify : $250.
1088 COthContactMannerSpecify : $250.
1089 CContactManner : 8.
1090 CContact : 8.
1091 CTreatmentReceived : $250.
1092 CContactReason : $250.
1093 ;
1094 FORMAT
1095 VDATE date9.
1096 REGDATE date9.
1097 DOCRECEIVEDDATE date9.
1098 DOCENTEREDDATE date9.
1099 RowNum $50.
1100 CContactManner T960X.
1101 CContact T958X.
1102 ;
1103 LABEL
1104 VisitCRFID = 'VisitCRFID'
1105 PID = 'Patient ID'
1106 PINIT = 'Patient Initials'
1107 VDate = 'Visit Date'
1108 VNum = 'Visit Number'
1109 VType = 'Visit Type'
1110 Docver = 'Document Version'
1111 TrtCode = 'Treatment Code'
1112 TrtDesc = 'Treatment Description'
1113 StratumCode = 'Stratum Code'
1114 StratumDesc = 'Stratum Description'
1115 RegDate = 'Registration Date'
1116 CentreCode = 'Centre Code'
1117 CentreName = 'Centre Name'
1118 DocReceivedDate = 'Document Received Date'
1119 DocEnteredDate = 'Document Entered Date'
1120 RowNum = 'RowNum'
1121 COthContactSpecify = 'COthContactSpecify'
1122 COthContactMannerSpecify = 'COthContactMannerSpecify'
1123 CContactManner = 'CContactManner'
1124 CContact = 'CContact'
1125 CTreatmentReceived = 'CTreatmentReceived'
1126 CContactReason = 'CContactReason'
1127 ;
1128 RUN;

```

NOTE: The infile "W:/OCOG/PRECISION/data/May 2020/PRECISE\_Q30DPB3.dat" is:  
 Filename=W:\OCOG\PRECISION\data\May 2020\PRECISE\_Q30DPB3.dat,  
 RECFM=V,LRECL=402,File Size (bytes)=101447,  
 Last Modified=07May2020:11:51:49,  
 Create Time=07May2020:11:51:49

NOTE: 336 records were read from the infile "W:/OCOG/PRECISION/data/May 2020/PRECISE\_Q30DPB3.dat".

The minimum record length was 268.

The maximum record length was 402.

NOTE: There were 336 observations read from the data set CWD.Q30DPB3.

NOTE: The data set WORK.Q30DPB3 has 336 observations and 23 variables.

NOTE: DATA statement used (Total process time):

real time 0.07 seconds

cpu time 0.04 seconds

1129

1130 DATA basepsa;

1131 set cwd.BASEPSA;

1132 INFILE "&dir.PRECISE\_BASEPSA.dat" LRECL=381 DSD DLM='^';

1133 MISSING A B C;

1134 INPUT

1135 VisitCRFID : 10.

1136 PID : 8.

1137 PINIT : \$10.

1138 VDate : date9.

1139 VNum : 8.

1140 VType : \$50.

1141 DocVer : 8.

1142 TrtCode : 8.

1143 TrtDesc : \$250.

1144 StratumCode : 8.

1145 StratumDesc : \$250.

1146 RegDate : date9.

1147 CentreCode : 8.

1148 CentreName : \$250.

1149 DocReceivedDate : date9.

1150 DocEnteredDate : date9.

1151 V1PSADate : date9.

1152 V1PSAResult : 12.2

1153 CRFComment : \$250.

1154 ;

1155 FORMAT

1156 VDATE date9.

1157 REGDATE date9.

1158 DOCRECEIVEDDATE date9.

1159 DOCENTEREDDATE date9.

1160 V1PSADate dates3m9.

1161 V1PSAResult missing7.

1162 ;

1163 LABEL

1164 VisitCRFID = 'VisitCRFID'

1165 PID = 'Patient ID'

1166 PINIT = 'Patient Initials'

1167 VDate = 'Visit Date'

1168 VNum = 'Visit Number'

1169 VType = 'Visit Type'

1170 Docver = 'Document Version'

1171 TrtCode = 'Treatment Code'

1172 TrtDesc = 'Treatment Description'

1173 StratumCode = 'Stratum Code'

1174 StratumDesc = 'Stratum Description'

1175 RegDate = 'Registration Date'

1176 CentreCode = 'Centre Code'

1177 CentreName = 'Centre Name'

1178 DocReceivedDate = 'Document Received Date'



```
1179 DocEnteredDate = 'Document Entered Date'
1180 V1PSADate = 'V1PSADate'
1181 V1PSAResult = 'V1PSAResult'
1182 CRFComment = 'CRFComment'
1183 ;
1184 RUN;
```

NOTE: The infile "W:/OCOG/PRECISION/data/May 2020/PRECISE\_BASEPSA.dat" is:  
Filename=W:\OCOG\PRECISION\data\May 2020\PRECISE\_BASEPSA.dat,  
RECFM=V,LRECL=381,File Size (bytes)=115287,  
Last Modified=07May2020:11:51:49,  
Create Time=07May2020:11:51:49

NOTE: 453 records were read from the infile "W:/OCOG/PRECISION/data/May 2020/PRECISE\_BASEPSA.dat".

The minimum record length was 201.

The maximum record length was 381.

One or more lines were truncated.

NOTE: There were 453 observations read from the data set CWD.BASEPSA.

NOTE: The data set WORK.BASEPSA has 453 observations and 19 variables.

NOTE: DATA statement used (Total process time):

real time 0.04 seconds

cpu time 0.03 seconds

```
1185
1186 DATA basepsa1;
1187     set cwd.BASEPSA1;
1188     INFILE "&dir.PRECISE_BASEPSA1.dat" LRECL=306 DSD DLM='^';
1189     MISSING A B C;
1190     INPUT
1191     VisitCRFID : 10.
1192     PID : 8.
1193     PINIT : $10.
1194     VDate : date9.
1195     VNum : 8.
1196     VType : $50.
1197     DocVer : 8.
1198     TrtCode : 8.
1199     TrtDesc : $250.
1200     StratumCode : 8.
1201     StratumDesc : $250.
1202     RegDate : date9.
1203     CentreCode : 8.
1204     CentreName : $250.
1205     DocReceivedDate : date9.
1206     DocEnteredDate : date9.
1207     RowNum : $50.
1208     PriorV1PSAResult : 12.2
1209     PriorV1PSADate : date9.
1210     ;
1211     FORMAT
1212     VDATE date9.
1213     REGDATE date9.
1214     DOCRECEIVEDDATE date9.
1215     DOCENTEREDDATE date9.
1216     RowNum $50.
1217     PriorV1PSAResult missing7.
1218     PriorV1PSADate dates3m9.
1219     ;
1220     LABEL
```

```
1221 VisitCRFID = 'VisitCRFID'
1222 PID = 'Patient ID'
1223 PINIT = 'Patient Initials'
1224 VDate = 'Visit Date'
1225 VNum = 'Visit Number'
1226 VType = 'Visit Type'
1227 Docver = 'Document Version'
1228 TrtCode = 'Treatment Code'
1229 TrtDesc = 'Treatment Description'
1230 StratumCode = 'Stratum Code'
1231 StratumDesc = 'Stratum Description'
1232 RegDate = 'Registration Date'
1233 CentreCode = 'Centre Code'
1234 CentreName = 'Centre Name'
1235 DocReceivedDate = 'Document Received Date'
1236 DocEnteredDate = 'Document Entered Date'
1237 RowNum = 'RowNum'
1238 PriorV1PSAResult = 'PriorV1PSAResult'
1239 PriorV1PSADate = 'PriorV1PSADate'
1240 ;
1241 RUN;
```

NOTE: The infile "W:/OCOG/PRECISION/data/May 2020/PRECISE\_BASEPSA1.dat" is:  
Filename=W:\OCOG\PRECISION\data\May 2020\PRECISE\_BASEPSA1.dat,  
RECFM=V,LRECL=306,File Size (bytes)=272490,  
Last Modified=07May2020:11:51:49,  
Create Time=07May2020:11:51:49

NOTE: 985 records were read from the infile "W:/OCOG/PRECISION/data/May 2020/PRECISE\_BASEPSA1.dat".

The minimum record length was 236.

The maximum record length was 306.

NOTE: There were 985 observations read from the data set CWD.BASEPSA1.

NOTE: The data set WORK.BASEPSA1 has 985 observations and 19 variables.

NOTE: DATA statement used (Total process time):

real time 0.07 seconds

cpu time 0.04 seconds

```
1242
1243 DATA fuppsa;
1244     set cwd.FUPPPSA;
1245     INFILE "&dir.PRECISE_FUPPPSA.dat" LRECL=314 DSD DLM='^';
1246     MISSING A B C;
1247     INPUT
1248     VisitCRFID : 10.
1249     PID : 8.
1250     PINIT : $10.
1251     VDate : date9.
1252     VNum : 8.
1253     VType : $50.
1254     DocVer : 8.
1255     TrtCode : 8.
1256     TrtDesc : $250.
1257     StratumCode : 8.
1258     StratumDesc : $250.
1259     RegDate : date9.
1260     CentreCode : 8.
1261     CentreName : $250.
1262     DocReceivedDate : date9.
1263     DocEnteredDate : date9.
```

```
1264 CRFComment : $250.
1265 ;
1266 FORMAT
1267 VDATE date9.
1268 REGDATE date9.
1269 DOCRECEIVEDDATE date9.
1270 DOCENTEREDDATE date9.
1271 ;
1272 LABEL
1273 VisitCRFID = 'VisitCRFID'
1274 PID = 'Patient ID'
1275 PINIT = 'Patient Initials'
1276 VDate = 'Visit Date'
1277 VNum = 'Visit Number'
1278 VType = 'Visit Type'
1279 Docver = 'Document Version'
1280 TrtCode = 'Treatment Code'
1281 TrtDesc = 'Treatment Description'
1282 StratumCode = 'Stratum Code'
1283 StratumDesc = 'Stratum Description'
1284 RegDate = 'Registration Date'
1285 CentreCode = 'Centre Code'
1286 CentreName = 'Centre Name'
1287 DocReceivedDate = 'Document Received Date'
1288 DocEnteredDate = 'Document Entered Date'
1289 CRFComment = 'CRFComment'
1290 ;
1291 RUN;
```

NOTE: The infile "W:/OCOG/PRECISION/data/May 2020/PRECISE\_FUPPSA.dat" is:  
Filename=W:\OCOG\PRECISION\data\May 2020\PRECISE\_FUPPSA.dat,  
RECFM=V,LRECL=314,File Size (bytes)=185588,  
Last Modified=07May2020:11:51:49,  
Create Time=07May2020:11:51:49

NOTE: 795 records were read from the infile "W:/OCOG/PRECISION/data/May 2020/PRECISE\_FUPPSA.dat".

The minimum record length was 194.  
The maximum record length was 314.  
One or more lines were truncated.

NOTE: There were 795 observations read from the data set CWD.FUPPSA.

NOTE: The data set WORK.FUPPSA has 795 observations and 17 variables.

NOTE: DATA statement used (Total process time):

|           |              |
|-----------|--------------|
| real time | 0.06 seconds |
| cpu time  | 0.01 seconds |

```
1292
1293 DATA fuppsa1;
1294     set cwd.FUPPSA1;
1295 INFILE "&dir.PRECISE_FUPPSA1.dat" LRECL=306 DSD DLM='^';
1296 MISSING A B C;
1297 INPUT
1298 VisitCRFID : 10.
1299 PID : 8.
1300 PINIT : $10.
1301 VDate : date9.
1302 VNum : 8.
1303 VType : $50.
1304 DocVer : 8.
1305 TrtCode : 8.
```

```

1306 TrtDesc : $250.
1307 StratumCode : 8.
1308 StratumDesc : $250.
1309 RegDate : date9.
1310 CentreCode : 8.
1311 CentreName : $250.
1312 DocReceivedDate : date9.
1313 DocEnteredDate : date9.
1314 RowNum : $50.
1315 PriorV1PSAResult : 12.2
1316 PriorV1PSADate : date9.
1317 ;
1318 FORMAT
1319 VDATE date9.
1320 REGDATE date9.
1321 DOCRECEIVEDDATE date9.
1322 DOCENTEREDDATE date9.
1323 RowNum $50.
1324 PriorV1PSAResult missing7.
1325 PriorV1PSADate dates3m9.
1326 ;
1327 LABEL
1328 VisitCRFID = 'VisitCRFID'
1329 PID = 'Patient ID'
1330 PINIT = 'Patient Initials'
1331 VDate = 'Visit Date'
1332 VNum = 'Visit Number'
1333 VType = 'Visit Type'
1334 Docver = 'Document Version'
1335 TrtCode = 'Treatment Code'
1336 TrtDesc = 'Treatment Description'
1337 StratumCode = 'Stratum Code'
1338 StratumDesc = 'Stratum Description'
1339 RegDate = 'Registration Date'
1340 CentreCode = 'Centre Code'
1341 CentreName = 'Centre Name'
1342 DocReceivedDate = 'Document Received Date'
1343 DocEnteredDate = 'Document Entered Date'
1344 RowNum = 'RowNum'
1345 PriorV1PSAResult = 'PriorV1PSAResult'
1346 PriorV1PSADate = 'PriorV1PSADate'
1347 ;
1348 RUN;

```

NOTE: The infile "W:/OCOG/PRECISION/data/May 2020/PRECISE\_FUPPSA1.dat" is:  
 Filename=W:\OCOG\PRECISION\data\May 2020\PRECISE\_FUPPSA1.dat,  
 RECFM=V,LRECL=306,File Size (bytes)=230579,  
 Last Modified=07May2020:11:51:49,  
 Create Time=07May2020:11:51:49

NOTE: 828 records were read from the infile "W:/OCOG/PRECISION/data/May 2020/PRECISE\_FUPPSA1.dat".

The minimum record length was 233.

The maximum record length was 306.

NOTE: There were 828 observations read from the data set CWD.FUPPSA1.

NOTE: The data set WORK.FUPPSA1 has 828 observations and 19 variables.

NOTE: DATA statement used (Total process time):

real time 0.04 seconds

cpu time 0.04 seconds

```

1349
1350 DATA medhx;
1351     set cwd.MEDHX;
1352 INFILE "&dir.PRECISE_MEDHX.dat" LRECL=496 DSD DLM='^';
1353 MISSING A B C;
1354 INPUT
1355 VisitCRFID : 10.
1356 PID : 8.
1357 PINIT : $10.
1358 VDate : date9.
1359 VNum : 8.
1360 VType : $50.
1361 DocVer : 8.
1362 TrtCode : 8.
1363 TrtDesc : $250.
1364 StratumCode : 8.
1365 StratumDesc : $250.
1366 RegDate : date9.
1367 CentreCode : 8.
1368 CentreName : $250.
1369 DocReceivedDate : date9.
1370 DocEnteredDate : date9.
1371 MedHis : 8.
1372 CRFComment : $250.
1373 ;
1374 FORMAT
1375 VDATE date9.
1376 REGDATE date9.
1377 DOCRECEIVEDDATE date9.
1378 DOCENTEREDDATE date9.
1379 MedHis truefals7.
1380 ;
1381 LABEL
1382 VisitCRFID = 'VisitCRFID'
1383 PID = 'Patient ID'
1384 PINIT = 'Patient Initials'
1385 VDate = 'Visit Date'
1386 VNum = 'Visit Number'
1387 VType = 'Visit Type'
1388 Docver = 'Document Version'
1389 TrtCode = 'Treatment Code'
1390 TrtDesc = 'Treatment Description'
1391 StratumCode = 'Stratum Code'
1392 StratumDesc = 'Stratum Description'
1393 RegDate = 'Registration Date'
1394 CentreCode = 'Centre Code'
1395 CentreName = 'Centre Name'
1396 DocReceivedDate = 'Document Received Date'
1397 DocEnteredDate = 'Document Entered Date'
1398 MedHis = 'MedHis'
1399 CRFComment = 'CRFComment'
1400 ;
1401 RUN;

```

NOTE: The infile "W:/OCOG/PRECISION/data/May 2020/PRECISE\_MEDHX.dat" is:  
 Filename=W:\OCOG\PRECISION\data\May 2020\PRECISE\_MEDHX.dat,  
 RECFM=V,LRECL=496,File Size (bytes)=109232,  
 Last Modified=07May2020:11:51:49,  
 Create Time=07May2020:11:51:49

NOTE: 452 records were read from the infile "W:/OCOG/PRECISION/data/May

2020/PRECISE\_MEDHX.dat".

The minimum record length was 199.

The maximum record length was 496.

NOTE: There were 452 observations read from the data set CWD.MEDHX.

NOTE: The data set WORK.MEDHX has 452 observations and 18 variables.

NOTE: DATA statement used (Total process time):

real time 0.06 seconds

cpu time 0.01 seconds

```
1402
1403 DATA medhx1;
1404     set cwd.MEDHX1;
1405 INFILE "&dir.PRECISE_MEDHX1.dat" LRECL=384 DSD DLM='^';
1406 MISSING A B C;
1407 INPUT
1408 VisitCRFID : 10.
1409 PID : 8.
1410 PINIT : $10.
1411 VDate : date9.
1412 VNum : 8.
1413 VType : $50.
1414 DocVer : 8.
1415 TrtCode : 8.
1416 TrtDesc : $250.
1417 StratumCode : 8.
1418 StratumDesc : $250.
1419 RegDate : date9.
1420 CentreCode : 8.
1421 CentreName : $250.
1422 DocReceivedDate : date9.
1423 DocEnteredDate : date9.
1424 RowNum : $50.
1425 OthSiteSpecify : $250.
1426 Site : 8.
1427 MedHisTerm : $250.
1428 Ongoing : 8.
1429 YearDiagnosed : 8.
1430 ;
1431 FORMAT
1432 VDATE date9.
1433 REGDATE date9.
1434 DOCRECEIVEDDATE date9.
1435 DOCENTEREDDATE date9.
1436 RowNum $50.
1437 Site T936X.
1438 Ongoing truefals7.
1439 YearDiagnosed missing7.
1440 ;
1441 LABEL
1442 VisitCRFID = 'VisitCRFID'
1443 PID = 'Patient ID'
1444 PINIT = 'Patient Initials'
1445 VDate = 'Visit Date'
1446 VNum = 'Visit Number'
1447 VType = 'Visit Type'
1448 Docver = 'Document Version'
1449 TrtCode = 'Treatment Code'
1450 TrtDesc = 'Treatment Description'
1451 StratumCode = 'Stratum Code'
1452 StratumDesc = 'Stratum Description'
```

```
1453 RegDate = 'Registration Date'
1454 CentreCode = 'Centre Code'
1455 CentreName = 'Centre Name'
1456 DocReceivedDate = 'Document Received Date'
1457 DocEnteredDate = 'Document Entered Date'
1458 RowNum = 'RowNum'
1459 OthSiteSpecify = 'OthSiteSpecify'
1460 Site = 'Site'
1461 MedHisTerm = 'MedHisTerm'
1462 Ongoing = 'Ongoing'
1463 YearDiagnosed = 'YearDiagnosed'
1464 ;
1465 RUN;
```

NOTE: The infile "W:/OCOG/PRECISION/data/May 2020/PRECISE\_MEDHX1.dat" is:  
Filename=W:\OCOG\PRECISION\data\May 2020\PRECISE\_MEDHX1.dat,  
RECFM=V,LRECL=384,File Size (bytes)=559716,  
Last Modified=07May2020:11:51:49,  
Create Time=07May2020:11:51:49

NOTE: 1886 records were read from the infile "W:/OCOG/PRECISION/data/May 2020/PRECISE\_MEDHX1.dat".

The minimum record length was 252.

The maximum record length was 384.

NOTE: There were 1886 observations read from the data set CWD.MEDHX1.

NOTE: The data set WORK.MEDHX1 has 1886 observations and 22 variables.

NOTE: DATA statement used (Total process time):

real time 0.09 seconds

cpu time 0.01 seconds

```
1466
1467 DATA dpe;
1468     set cwd.DPE;
1469 INFILE "&dir.PRECISE_DPE.dat" LRECL=741 DSD DLM='^';
1470 MISSING A B C;
1471 INPUT
1472 VisitCRFID : 10.
1473 PID : 8.
1474 PINIT : $10.
1475 VDate : date9.
1476 VNum : 8.
1477 VType : $50.
1478 DocVer : 8.
1479 TrtCode : 8.
1480 TrtDesc : $250.
1481 StratumCode : 8.
1482 StratumDesc : $250.
1483 RegDate : date9.
1484 CentreCode : 8.
1485 CentreName : $250.
1486 DocReceivedDate : date9.
1487 DocEnteredDate : date9.
1488 DOB : date9.
1489 Race : 8.
1490 RaceSpecify : $250.
1491 FamilyHistory : 8.
1492 FamilyHistoryFather : 8.
1493 FamilyHistoryBrother : 8.
1494 FamilyHistorySon : 8.
1495 FamilyHistoryOther : 8.
```

```
1496 FamilyHistoryOtherSpecify : $250.
1497 PhysicalAssessmentDate : date9.
1498 Height : 12.2
1499 Weight : 12.2
1500 BPSystolic : 12.2
1501 BPDiastolic : 12.2
1502 HeartRate : 12.2
1503 ECOG : 12.2
1504 DigitalRectalExam : 8.
1505 Size : 8.
1506 Size_2 : 8.
1507 PalpableTumour : 8.
1508 RenalImpairment : 8.
1509 CreatinineCollection : 8.
1510 CreatinineDate : date9.
1511 CreatinineResult : 12.2
1512 CRFComment : $250.
1513 ;
1514 FORMAT
1515 VDATE date9.
1516 REGDATE date9.
1517 DOCRECEIVEDDATE date9.
1518 DOCENTEREDDATE date9.
1519 DOB dates3m9.
1520 Race T945X.
1521 FamilyHistory T915X.
1522 FamilyHistoryFather truefals7.
1523 FamilyHistoryBrother truefals7.
1524 FamilyHistorySon truefals7.
1525 FamilyHistoryOther truefals7.
1526 PhysicalAssessmentDate dates3m9.
1527 Height missing7.
1528 Weight missing7.
1529 BPSystolic missing7.
1530 BPDiastolic missing7.
1531 HeartRate missing7.
1532 ECOG missing7.
1533 DigitalRectalExam T763X.
1534 Size T955X.
1535 Size_2 T1087X.
1536 PalpableTumour T956X.
1537 RenalImpairment truefals7.
1538 CreatinineCollection truefals7.
1539 CreatinineDate dates3m9.
1540 CreatinineResult missing7.
1541 ;
1542 LABEL
1543 VisitCRFID = 'VisitCRFID'
1544 PID = 'Patient ID'
1545 PINIT = 'Patient Initials'
1546 VDate = 'Visit Date'
1547 VNum = 'Visit Number'
1548 VType = 'Visit Type'
1549 Docver = 'Document Version'
1550 TrtCode = 'Treatment Code'
1551 TrtDesc = 'Treatment Description'
1552 StratumCode = 'Stratum Code'
1553 StratumDesc = 'Stratum Description'
1554 RegDate = 'Registration Date'
1555 CentreCode = 'Centre Code'
1556 CentreName = 'Centre Name'
```



```
1557 DocReceivedDate = 'Document Received Date'
1558 DocEnteredDate = 'Document Entered Date'
1559 DOB = 'DOB'
1560 Race = 'Race'
1561 RaceSpecify = 'RaceSpecify'
1562 FamilyHistory = 'FamilyHistory'
1563 FamilyHistoryFather = 'FamilyHistoryFather'
1564 FamilyHistoryBrother = 'FamilyHistoryBrother'
1565 FamilyHistorySon = 'FamilyHistorySon'
1566 FamilyHistoryOther = 'FamilyHistoryOther'
1567 FamilyHistoryOtherSpecify = 'FamilyHistoryOtherSpecify'
1568 PhysicalAssessmentDate = 'PhysicalAssessmentDate'
1569 Height = 'Height'
1570 Weight = 'Weight'
1571 BPSystolic = 'BPSystolic'
1572 BPDiastolic = 'BPDiastolic'
1573 HeartRate = 'HeartRate'
1574 ECOG = 'ECOG'
1575 DigitalRectalExam = 'DigitalRectalExam'
1576 Size = 'Size'
1577 Size_2 = 'Size_2'
1578 PalpableTumour = 'PalpableTumour'
1579 RenalImpairment = 'RenalImpairment'
1580 CreatinineCollection = 'CreatinineCollection'
1581 CreatinineDate = 'CreatinineDate'
1582 CreatinineResult = 'CreatinineResult'
1583 CRFComment = 'CRFComment'
1584 ;
1585 RUN;
```

NOTE: The infile "W:/OCOG/PRECISION/data/May 2020/PRECISE\_DPE.dat" is:  
Filename=W:\OCOG\PRECISION\data\May 2020\PRECISE\_DPE.dat,  
RECFM=V,LRECL=741,File Size (bytes)=154944,  
Last Modified=07May2020:11:51:49,  
Create Time=07May2020:11:51:49

NOTE: 453 records were read from the infile "W:/OCOG/PRECISION/data/May 2020/PRECISE\_DPE.dat".

The minimum record length was 290.

The maximum record length was 741.

NOTE: There were 453 observations read from the data set CWD.DPE.

NOTE: The data set WORK.DPE has 453 observations and 41 variables.

NOTE: DATA statement used (Total process time):

real time 0.09 seconds

cpu time 0.06 seconds

```
1586
1587 DATA conmeds;
1588     set cwd.CONMEDS;
1589 INFILE "&dir.PRECISE_CONMEDS.dat" LRECL=433 DSD DLM='^';
1590 MISSING A B C;
1591 INPUT
1592 VisitCRFID : 10.
1593 PID : 8.
1594 PINIT : $10.
1595 VDate : date9.
1596 VNum : 8.
1597 VType : $50.
1598 DocVer : 8.
1599 TrtCode : 8.
```

```

1600 TrtDesc : $250.
1601 StratumCode : 8.
1602 StratumDesc : $250.
1603 RegDate : date9.
1604 CentreCode : 8.
1605 CentreName : $250.
1606 DocReceivedDate : date9.
1607 DocEnteredDate : date9.
1608 NoMed : 8.
1609 CRFComment : $250.
1610 ;
1611 FORMAT
1612 VDATE date9.
1613 REGDATE date9.
1614 DOCRECEIVEDDATE date9.
1615 DOCENTEREDDATE date9.
1616 NoMed truefals7.
1617 ;
1618 LABEL
1619 VisitCRFID = 'VisitCRFID'
1620 PID = 'Patient ID'
1621 PINIT = 'Patient Initials'
1622 VDate = 'Visit Date'
1623 VNum = 'Visit Number'
1624 VType = 'Visit Type'
1625 Docver = 'Document Version'
1626 TrtCode = 'Treatment Code'
1627 TrtDesc = 'Treatment Description'
1628 StratumCode = 'Stratum Code'
1629 StratumDesc = 'Stratum Description'
1630 RegDate = 'Registration Date'
1631 CentreCode = 'Centre Code'
1632 CentreName = 'Centre Name'
1633 DocReceivedDate = 'Document Received Date'
1634 DocEnteredDate = 'Document Entered Date'
1635 NoMed = 'NoMed'
1636 CRFComment = 'CRFComment'
1637 ;
1638 RUN;

```

NOTE: The infile "W:/OCOG/PRECISION/data/May 2020/PRECISE\_CONMEDS.dat" is:  
 Filename=W:\OCOG\PRECISION\data\May 2020\PRECISE\_CONMEDS.dat,  
 RECFM=V,LRECL=433,File Size (bytes)=521231,  
 Last Modified=07May2020:11:51:49,  
 Create Time=07May2020:11:51:49

NOTE: 2216 records were read from the infile "W:/OCOG/PRECISION/data/May 2020/PRECISE\_CONMEDS.dat".

The minimum record length was 196.

The maximum record length was 433.

NOTE: There were 2216 observations read from the data set CWD.CONMEDS.

NOTE: The data set WORK.CONMEDS has 2216 observations and 18 variables.

NOTE: DATA statement used (Total process time):

real time 0.10 seconds

cpu time 0.06 seconds

```

1639
1640 DATA conmeds1;
1641     set cwd.CONMEDS1;
1642 INFILE "&dir.PRECISE_CONMEDS1.dat" LRECL=616 DSD DLM='^';

```

```
1643 MISSING A B C;
1644 INPUT
1645 VisitCRFID : 10.
1646 PID : 8.
1647 PINIT : $10.
1648 VDate : date9.
1649 VNum : 8.
1650 VType : $50.
1651 DocVer : 8.
1652 TrtCode : 8.
1653 TrtDesc : $250.
1654 StratumCode : 8.
1655 StratumDesc : $250.
1656 RegDate : date9.
1657 CentreCode : 8.
1658 CentreName : $250.
1659 DocReceivedDate : date9.
1660 DocEnteredDate : date9.
1661 RowNum : $50.
1662 MedUnit : 8.
1663 MedFreq : 8.
1664 MedDose : 12.2
1665 MedIndication : $250.
1666 OthMedUnitSpecify : $250.
1667 Medication : $250.
1668 MedStartDate : $11.
1669 MedStopDate : $11.
1670 MedOngoing : 8.
1671 ;
1672 FORMAT
1673 VDATE date9.
1674 REGDATE date9.
1675 DOCRECEIVEDDATE date9.
1676 DOCENTEREDDATE date9.
1677 RowNum $50.
1678 MedUnit T967X.
1679 MedFreq T335X.
1680 MedDose missing7.
1681 MedOngoing truefals7.
1682 ;
1683 LABEL
1684 VisitCRFID = 'VisitCRFID'
1685 PID = 'Patient ID'
1686 PINIT = 'Patient Initials'
1687 VDate = 'Visit Date'
1688 VNum = 'Visit Number'
1689 VType = 'Visit Type'
1690 Docver = 'Document Version'
1691 TrtCode = 'Treatment Code'
1692 TrtDesc = 'Treatment Description'
1693 StratumCode = 'Stratum Code'
1694 StratumDesc = 'Stratum Description'
1695 RegDate = 'Registration Date'
1696 CentreCode = 'Centre Code'
1697 CentreName = 'Centre Name'
1698 DocReceivedDate = 'Document Received Date'
1699 DocEnteredDate = 'Document Entered Date'
1700 RowNum = 'RowNum'
1701 MedUnit = 'MedUnit'
1702 MedFreq = 'MedFreq'
1703 MedDose = 'MedDose'
```

```
1704 MedIndication = 'MedIndication'
1705 OthMedUnitSpecify = 'OthMedUnitSpecify'
1706 Medication = 'Medication'
1707 MedStartDate = 'MedStartDate'
1708 MedStopDate = 'MedStopDate'
1709 MedOngoing = 'MedOngoing'
1710 ;
1711 RUN;
```

NOTE: The infile "W:/OCOG/PRECISION/data/May 2020/PRECISE\_CONMEDS1.dat" is:  
Filename=W:\OCOG\PRECISION\data\May 2020\PRECISE\_CONMEDS1.dat,  
RECFM=V,LRECL=616,File Size (bytes)=3284435,  
Last Modified=07May2020:11:51:49,  
Create Time=07May2020:11:51:49

NOTE: 10046 records were read from the infile "W:/OCOG/PRECISION/data/May 2020/PRECISE\_CONMEDS1.dat".

The minimum record length was 255.

The maximum record length was 616.

NOTE: There were 10046 observations read from the data set CWD.CONMEDS1.

NOTE: The data set WORK.CONMEDS1 has 10046 observations and 26 variables.

NOTE: DATA statement used (Total process time):

real time                   0.54 seconds

cpu time                    0.28 seconds

```
1712
1713 DATA trus;
1714     set cwd.TRUS;
1715     INFILE "&dir.PRECISE_TRUS.dat" LRECL=1017 DSD DLM='^';
1716     MISSING A B C;
1717     INPUT
1718     VisitCRFID : 10.
1719     PID : 8.
1720     PINIT : $10.
1721     VDate : date9.
1722     VNum : 8.
1723     VType : $50.
1724     DocVer : 8.
1725     TrtCode : 8.
1726     TrtDesc : $250.
1727     StratumCode : 8.
1728     StratumDesc : $250.
1729     RegDate : date9.
1730     CentreCode : 8.
1731     CentreName : $250.
1732     DocReceivedDate : date9.
1733     DocEnteredDate : date9.
1734     TRUSBiopsyDate : date9.
1735     TRUSBiopsyResult : 8.
1736     TissueSample : 8.
1737     KITId : $250.
1738     BiopsyOperator : $250.
1739     LtLatBaseCancer : 8.
1740     LtLatBaseGleason1 : 12.2
1741     LtLatBaseGleason2 : 12.2
1742     LtLatBaseGleasonRes : 12.2
1743     LtLatBaseTumour : 12.2
1744     LtLatBaseNonTumour : 8.
1745     LtLatBaseOtherSpecify : $250.
1746     LtLatMidCancer : 8.
```

1747 LtLatMidGleason1 : 12.2  
1748 LtLatMidGleason2 : 12.2  
1749 LtLatMidGleasonRes : 12.2  
1750 LtLatMidTumour : 12.2  
1751 LtLatMidNonTumour : 8.  
1752 LtLatMidOtherSpecify : \$250.  
1753 LtLatApexCancer : 8.  
1754 LtLatApexGleason1 : 12.2  
1755 LtLatApexGleason2 : 12.2  
1756 LtLatApexGleasonRes : 12.2  
1757 LtLatApexTumour : 12.2  
1758 LtLatApexNonTumour : 8.  
1759 LtLatApexOtherSpecify : \$250.  
1760 LtMedBaseCancer : 8.  
1761 LtMedBaseGleason1 : 12.2  
1762 LtMedBaseGleason2 : 12.2  
1763 LtMedBaseGleasonRes : 12.2  
1764 LtMedBaseTumour : 12.2  
1765 LtMedBaseNonTumour : 8.  
1766 LtMedBaseOtherSpecify : \$250.  
1767 LtMedMidCancer : 8.  
1768 LtMedMidGleason1 : 12.2  
1769 LtMedMidGleason2 : 12.2  
1770 LtMedMidGleasonRes : 12.2  
1771 LtMedMidTumour : 12.2  
1772 LtMedMidNonTumour : 8.  
1773 LtMedMidOtherSpecify : \$250.  
1774 LtMedApexCancer : 8.  
1775 LtMedApexGleason1 : 12.2  
1776 LtMedApexGleason2 : 12.2  
1777 LtMedApexGleasonRes : 12.2  
1778 LtMedApexTumour : 12.2  
1779 LtMedApexNonTumour : 8.  
1780 LtMedApexOtherSpecify : \$250.  
1781 RtMedBaseCancer : 8.  
1782 RtMedBaseGleason1 : 12.2  
1783 RtMedBaseGleason2 : 12.2  
1784 RtMedBaseGleasonRes : 12.2  
1785 RtMedBaseTumour : 12.2  
1786 RtMedBaseNonTumour : 8.  
1787 RtMedBaseOtherSpecify : \$250.  
1788 RtMedMidCancer : 8.  
1789 RtMedMidGleason1 : 12.2  
1790 RtMedMidGleason2 : 12.2  
1791 RtMedMidGleasonRes : 12.2  
1792 RtMedMidTumour : 12.2  
1793 RtMedMidNonTumour : 8.  
1794 RtMedMidOtherSpecify : \$250.  
1795 RtMedApexCancer : 8.  
1796 RtMedApexGleason1 : 12.2  
1797 RtMedApexGleason2 : 12.2  
1798 RtMedApexGleasonRes : 12.2  
1799 RtMedApexTumour : 12.2  
1800 RtMedApexNonTumour : 8.  
1801 RtMedApexOtherSpecify : \$250.  
1802 RtLatBaseCancer : 8.  
1803 RtLatBaseGleason1 : 12.2  
1804 RtLatBaseGleason2 : 12.2  
1805 RtLatBaseGleasonRes : 12.2  
1806 RtLatBaseTumour : 12.2  
1807 RtLatBaseNonTumour : 8.

1808 RtLatBaseOtherSpecify : \$250.  
1809 RtLatMidCancer : 8.  
1810 RtLatMidGleason1 : 12.2  
1811 RtLatMidGleason2 : 12.2  
1812 RtLatMidGleasonRes : 12.2  
1813 RtLatMidTumour : 12.2  
1814 RtLatMidNonTumour : 8.  
1815 RtLatMidOtherSpecify : \$250.  
1816 RtLatApexCancer : 8.  
1817 RtLatApexGleason1 : 12.2  
1818 RtLatApexGleason2 : 12.2  
1819 RtLatApexGleasonRes : 12.2  
1820 RtLatApexTumour : 12.2  
1821 RtLatApexNonTumour : 8.  
1822 RtLatApexOtherSpecify : \$250.  
1823 GlobalGleason1 : 12.2  
1824 GlobalGleason2 : 12.2  
1825 GlobalGleasonRes : 12.2  
1826 PercentGleason : 12.2  
1827 TotalCoresSubmitted : 12.2  
1828 NumPositiveCores : 12.2  
1829 TumourVolume : 12.2  
1830 IDC : 8.  
1831 PeriprostaticFatInvasion : 8.  
1832 SeminalVesicleInvasion : 8.  
1833 LymphVascularInvasion : 8.  
1834 PerineuralInvasion : 8.  
1835 CRFComment : \$250.  
1836 ;  
1837 FORMAT  
1838 VDATE date9.  
1839 REGDATE date9.  
1840 DOCRECEIVEDDATE date9.  
1841 DOCENTEREDDATE date9.  
1842 TRUSBiopsyDate dates3m9.  
1843 TRUSBiopsyResult T510X.  
1844 TissueSample truefals7.  
1845 LtLatBaseCancer truefals7.  
1846 LtLatBaseGleason1 missing7.  
1847 LtLatBaseGleason2 missing7.  
1848 LtLatBaseGleasonRes missing7.  
1849 LtLatBaseTumour missing7.  
1850 LtLatBaseNonTumour T948X.  
1851 LtLatMidCancer truefals7.  
1852 LtLatMidGleason1 missing7.  
1853 LtLatMidGleason2 missing7.  
1854 LtLatMidGleasonRes missing7.  
1855 LtLatMidTumour missing7.  
1856 LtLatMidNonTumour T948X.  
1857 LtLatApexCancer truefals7.  
1858 LtLatApexGleason1 missing7.  
1859 LtLatApexGleason2 missing7.  
1860 LtLatApexGleasonRes missing7.  
1861 LtLatApexTumour missing7.  
1862 LtLatApexNonTumour T948X.  
1863 LtMedBaseCancer truefals7.  
1864 LtMedBaseGleason1 missing7.  
1865 LtMedBaseGleason2 missing7.  
1866 LtMedBaseGleasonRes missing7.  
1867 LtMedBaseTumour missing7.  
1868 LtMedBaseNonTumour T948X.

1869 LtMedMidCancer truefals7.  
1870 LtMedMidGleason1 missing7.  
1871 LtMedMidGleason2 missing7.  
1872 LtMedMidGleasonRes missing7.  
1873 LtMedMidTumour missing7.  
1874 LtMedMidNonTumour T948X.  
1875 LtMedApexCancer truefals7.  
1876 LtMedApexGleason1 missing7.  
1877 LtMedApexGleason2 missing7.  
1878 LtMedApexGleasonRes missing7.  
1879 LtMedApexTumour missing7.  
1880 LtMedApexNonTumour T948X.  
1881 RtMedBaseCancer truefals7.  
1882 RtMedBaseGleason1 missing7.  
1883 RtMedBaseGleason2 missing7.  
1884 RtMedBaseGleasonRes missing7.  
1885 RtMedBaseTumour missing7.  
1886 RtMedBaseNonTumour T948X.  
1887 RtMedMidCancer truefals7.  
1888 RtMedMidGleason1 missing7.  
1889 RtMedMidGleason2 missing7.  
1890 RtMedMidGleasonRes missing7.  
1891 RtMedMidTumour missing7.  
1892 RtMedMidNonTumour T948X.  
1893 RtMedApexCancer truefals7.  
1894 RtMedApexGleason1 missing7.  
1895 RtMedApexGleason2 missing7.  
1896 RtMedApexGleasonRes missing7.  
1897 RtMedApexTumour missing7.  
1898 RtMedApexNonTumour T948X.  
1899 RtLatBaseCancer truefals7.  
1900 RtLatBaseGleason1 missing7.  
1901 RtLatBaseGleason2 missing7.  
1902 RtLatBaseGleasonRes missing7.  
1903 RtLatBaseTumour missing7.  
1904 RtLatBaseNonTumour T948X.  
1905 RtLatMidCancer truefals7.  
1906 RtLatMidGleason1 missing7.  
1907 RtLatMidGleason2 missing7.  
1908 RtLatMidGleasonRes missing7.  
1909 RtLatMidTumour missing7.  
1910 RtLatMidNonTumour T948X.  
1911 RtLatApexCancer truefals7.  
1912 RtLatApexGleason1 missing7.  
1913 RtLatApexGleason2 missing7.  
1914 RtLatApexGleasonRes missing7.  
1915 RtLatApexTumour missing7.  
1916 RtLatApexNonTumour T948X.  
1917 GlobalGleason1 missing7.  
1918 GlobalGleason2 missing7.  
1919 GlobalGleasonRes missing7.  
1920 PercentGleason missing7.  
1921 TotalCoresSubmitted missing7.  
1922 NumPositiveCores missing7.  
1923 TumourVolume missing7.  
1924 IDC T437X.  
1925 PeriprostaticFatInvasion T947X.  
1926 SeminalVesicleInvasion T947X.  
1927 LymphVascularInvasion T947X.  
1928 PerineuralInvasion T437X.  
1929 ;

1930 LABEL  
1931 VisitCRFID = 'VisitCRFID'  
1932 PID = 'Patient ID'  
1933 PINIT = 'Patient Initials'  
1934 VDate = 'Visit Date'  
1935 VNum = 'Visit Number'  
1936 VType = 'Visit Type'  
1937 Docver = 'Document Version'  
1938 TrtCode = 'Treatment Code'  
1939 TrtDesc = 'Treatment Description'  
1940 StratumCode = 'Stratum Code'  
1941 StratumDesc = 'Stratum Description'  
1942 RegDate = 'Registration Date'  
1943 CentreCode = 'Centre Code'  
1944 CentreName = 'Centre Name'  
1945 DocReceivedDate = 'Document Received Date'  
1946 DocEnteredDate = 'Document Entered Date'  
1947 TRUSBiopsyDate = 'TRUSBiopsyDate'  
1948 TRUSBiopsyResult = 'TRUSBiopsyResult'  
1949 TissueSample = 'TissueSample'  
1950 KITId = 'KITId'  
1951 BiopsyOperator = 'BiopsyOperator'  
1952 LtLatBaseCancer = 'LtLatBaseCancer'  
1953 LtLatBaseGleason1 = 'LtLatBaseGleason1'  
1954 LtLatBaseGleason2 = 'LtLatBaseGleason2'  
1955 LtLatBaseGleasonRes = 'LtLatBaseGleasonRes'  
1956 LtLatBaseTumour = 'LtLatBaseTumour'  
1957 LtLatBaseNonTumour = 'LtLatBaseNonTumour'  
1958 LtLatBaseOtherSpecify = 'LtLatBaseOtherSpecify'  
1959 LtLatMidCancer = 'LtLatMidCancer'  
1960 LtLatMidGleason1 = 'LtLatMidGleason1'  
1961 LtLatMidGleason2 = 'LtLatMidGleason2'  
1962 LtLatMidGleasonRes = 'LtLatMidGleasonRes'  
1963 LtLatMidTumour = 'LtLatMidTumour'  
1964 LtLatMidNonTumour = 'LtLatMidNonTumour'  
1965 LtLatMidOtherSpecify = 'LtLatMidOtherSpecify'  
1966 LtLatApexCancer = 'LtLatApexCancer'  
1967 LtLatApexGleason1 = 'LtLatApexGleason1'  
1968 LtLatApexGleason2 = 'LtLatApexGleason2'  
1969 LtLatApexGleasonRes = 'LtLatApexGleasonRes'  
1970 LtLatApexTumour = 'LtLatApexTumour'  
1971 LtLatApexNonTumour = 'LtLatApexNonTumour'  
1972 LtLatApexOtherSpecify = 'LtLatApexOtherSpecify'  
1973 LtMedBaseCancer = 'LtMedBaseCancer'  
1974 LtMedBaseGleason1 = 'LtMedBaseGleason1'  
1975 LtMedBaseGleason2 = 'LtMedBaseGleason2'  
1976 LtMedBaseGleasonRes = 'LtMedBaseGleasonRes'  
1977 LtMedBaseTumour = 'LtMedBaseTumour'  
1978 LtMedBaseNonTumour = 'LtMedBaseNonTumour'  
1979 LtMedBaseOtherSpecify = 'LtMedBaseOtherSpecify'  
1980 LtMedMidCancer = 'LtMedMidCancer'  
1981 LtMedMidGleason1 = 'LtMedMidGleason1'  
1982 LtMedMidGleason2 = 'LtMedMidGleason2'  
1983 LtMedMidGleasonRes = 'LtMedMidGleasonRes'  
1984 LtMedMidTumour = 'LtMedMidTumour'  
1985 LtMedMidNonTumour = 'LtMedMidNonTumour'  
1986 LtMedMidOtherSpecify = 'LtMedMidOtherSpecify'  
1987 LtMedApexCancer = 'LtMedApexCancer'  
1988 LtMedApexGleason1 = 'LtMedApexGleason1'  
1989 LtMedApexGleason2 = 'LtMedApexGleason2'  
1990 LtMedApexGleasonRes = 'LtMedApexGleasonRes'



```
1991 LtMedApexTumour = 'LtMedApexTumour'
1992 LtMedApexNonTumour = 'LtMedApexNonTumour'
1993 LtMedApexOtherSpecify = 'LtMedApexOtherSpecify'
1994 RtMedBaseCancer = 'RtMedBaseCancer'
1995 RtMedBaseGleason1 = 'RtMedBaseGleason1'
1996 RtMedBaseGleason2 = 'RtMedBaseGleason2'
1997 RtMedBaseGleasonRes = 'RtMedBaseGleasonRes'
1998 RtMedBaseTumour = 'RtMedBaseTumour'
1999 RtMedBaseNonTumour = 'RtMedBaseNonTumour'
2000 RtMedBaseOtherSpecify = 'RtMedBaseOtherSpecify'
2001 RtMedMidCancer = 'RtMedMidCancer'
2002 RtMedMidGleason1 = 'RtMedMidGleason1'
2003 RtMedMidGleason2 = 'RtMedMidGleason2'
2004 RtMedMidGleasonRes = 'RtMedMidGleasonRes'
2005 RtMedMidTumour = 'RtMedMidTumour'
2006 RtMedMidNonTumour = 'RtMedMidNonTumour'
2007 RtMedMidOtherSpecify = 'RtMedMidOtherSpecify'
2008 RtMedApexCancer = 'RtMedApexCancer'
2009 RtMedApexGleason1 = 'RtMedApexGleason1'
2010 RtMedApexGleason2 = 'RtMedApexGleason2'
2011 RtMedApexGleasonRes = 'RtMedApexGleasonRes'
2012 RtMedApexTumour = 'RtMedApexTumour'
2013 RtMedApexNonTumour = 'RtMedApexNonTumour'
2014 RtMedApexOtherSpecify = 'RtMedApexOtherSpecify'
2015 RtLatBaseCancer = 'RtLatBaseCancer'
2016 RtLatBaseGleason1 = 'RtLatBaseGleason1'
2017 RtLatBaseGleason2 = 'RtLatBaseGleason2'
2018 RtLatBaseGleasonRes = 'RtLatBaseGleasonRes'
2019 RtLatBaseTumour = 'RtLatBaseTumour'
2020 RtLatBaseNonTumour = 'RtLatBaseNonTumour'
2021 RtLatBaseOtherSpecify = 'RtLatBaseOtherSpecify'
2022 RtLatMidCancer = 'RtLatMidCancer'
2023 RtLatMidGleason1 = 'RtLatMidGleason1'
2024 RtLatMidGleason2 = 'RtLatMidGleason2'
2025 RtLatMidGleasonRes = 'RtLatMidGleasonRes'
2026 RtLatMidTumour = 'RtLatMidTumour'
2027 RtLatMidNonTumour = 'RtLatMidNonTumour'
2028 RtLatMidOtherSpecify = 'RtLatMidOtherSpecify'
2029 RtLatApexCancer = 'RtLatApexCancer'
2030 RtLatApexGleason1 = 'RtLatApexGleason1'
2031 RtLatApexGleason2 = 'RtLatApexGleason2'
2032 RtLatApexGleasonRes = 'RtLatApexGleasonRes'
2033 RtLatApexTumour = 'RtLatApexTumour'
2034 RtLatApexNonTumour = 'RtLatApexNonTumour'
2035 RtLatApexOtherSpecify = 'RtLatApexOtherSpecify'
2036 GlobalGleason1 = 'GlobalGleason1'
2037 GlobalGleason2 = 'GlobalGleason2'
2038 GlobalGleasonRes = 'GlobalGleasonRes'
2039 PercentGleason = 'PercentGleason'
2040 TotalCoresSubmitted = 'TotalCoresSubmitted'
2041 NumPositiveCores = 'NumPositiveCores'
2042 TumourVolume = 'TumourVolume'
2043 IDC = 'IDC'
2044 PeriprostaticFatInvasion = 'PeriprostaticFatInvasion'
2045 SeminalVesicleInvasion = 'SeminalVesicleInvasion'
2046 LymphVascularInvasion = 'LymphVascularInvasion'
2047 PerineuralInvasion = 'PerineuralInvasion'
2048 CRFComment = 'CRFComment'
2049 ;
2050 RUN;
```

NOTE: The infile "W:/OCOG/PRECISION/data/May 2020/PRECISE\_TRUS.dat" is:  
Filename=W:\OCOG\PRECISION\data\May 2020\PRECISE\_TRUS.dat,  
RECFM=V,LRECL=1017,File Size (bytes)=126119,  
Last Modified=07May2020:11:51:49,  
Create Time=07May2020:11:51:49

NOTE: 202 records were read from the infile "W:/OCOG/PRECISION/data/May 2020/PRECISE\_TRUS.dat".

The minimum record length was 490.

The maximum record length was 1017.

NOTE: There were 202 observations read from the data set CWD.TRUS.

NOTE: The data set WORK.TRUS has 202 observations and 118 variables.

NOTE: DATA statement used (Total process time):

real time                   0.21 seconds

cpu time                    0.12 seconds

```
2051
2052 DATA trus1;
2053     set cwd.TRUS1;
2054     INFILE "&dir.PRECISE_TRUS1.dat" LRECL=352 DSD DLM='^';
2055     MISSING A B C;
2056     INPUT
2057     VisitCRFID : 10.
2058     PID : 8.
2059     PINIT : $10.
2060     VDate : date9.
2061     VNum : 8.
2062     VType : $50.
2063     DocVer : 8.
2064     TrtCode : 8.
2065     TrtDesc : $250.
2066     StratumCode : 8.
2067     StratumDesc : $250.
2068     RegDate : date9.
2069     CentreCode : 8.
2070     CentreName : $250.
2071     DocReceivedDate : date9.
2072     DocEnteredDate : date9.
2073     RowNum : $50.
2074     OthSiteNonTumour : 8.
2075     OthSiteGleason1 : 12.2
2076     OthSiteTumour : 12.2
2077     OthSiteGleasonRes : 12.2
2078     OthSiteGleason2 : 12.2
2079     OthSiteCancer : 8.
2080     OthSiteNonTumourOthSpecify : $250.
2081     OthSiteSpecify : $250.
2082     ;
2083     FORMAT
2084     VDATE date9.
2085     REGDATE date9.
2086     DOCRECEIVEDDATE date9.
2087     DOCENTEREDDATE date9.
2088     RowNum $50.
2089     OthSiteNonTumour T381X.
2090     OthSiteGleason1 missing7.
2091     OthSiteTumour missing7.
2092     OthSiteGleasonRes missing7.
2093     OthSiteGleason2 missing7.
2094     OthSiteCancer truefals7.
```

```

2095 ;
2096 LABEL
2097 VisitCRFID = 'VisitCRFID'
2098 PID = 'Patient ID'
2099 PINIT = 'Patient Initials'
2100 VDate = 'Visit Date'
2101 VNum = 'Visit Number'
2102 VType = 'Visit Type'
2103 Docver = 'Document Version'
2104 TrtCode = 'Treatment Code'
2105 TrtDesc = 'Treatment Description'
2106 StratumCode = 'Stratum Code'
2107 StratumDesc = 'Stratum Description'
2108 RegDate = 'Registration Date'
2109 CentreCode = 'Centre Code'
2110 CentreName = 'Centre Name'
2111 DocReceivedDate = 'Document Received Date'
2112 DocEnteredDate = 'Document Entered Date'
2113 RowNum = 'RowNum'
2114 OthSiteNonTumour = 'OthSiteNonTumour'
2115 OthSiteGleason1 = 'OthSiteGleason1'
2116 OthSiteTumour = 'OthSiteTumour'
2117 OthSiteGleasonRes = 'OthSiteGleasonRes'
2118 OthSiteGleason2 = 'OthSiteGleason2'
2119 OthSiteCancer = 'OthSiteCancer'
2120 OthSiteNonTumourOthSpecify = 'OthSiteNonTumourOthSpecify'
2121 OthSiteSpecify = 'OthSiteSpecify'
2122 ;
2123 RUN;

```

NOTE: The infile "W:/OCOG/PRECISION/data/May 2020/PRECISE\_TRUS1.dat" is:  
 Filename=W:\OCOG\PRECISION\data\May 2020\PRECISE\_TRUS1.dat,  
 RECFM=V,LRECL=352,File Size (bytes)=59031,  
 Last Modified=07May2020:11:51:49,  
 Create Time=07May2020:11:51:49

NOTE: 201 records were read from the infile "W:/OCOG/PRECISION/data/May 2020/PRECISE\_TRUS1.dat".

The minimum record length was 256.

The maximum record length was 352.

NOTE: There were 201 observations read from the data set CWD.TRUS1.

NOTE: The data set WORK.TRUS1 has 201 observations and 25 variables.

NOTE: DATA statement used (Total process time):

real time 0.06 seconds

cpu time 0.00 seconds

```

2124
2125 DATA targetedmri;
2126     set cwd.TARGETEDMRI;
2127     INFILE "&dir.PRECISE_TARGETEDMRI.dat" LRECL=1102 DSD DLM='^';
2128     MISSING A B C;
2129     INPUT
2130     VisitCRFID : 10.
2131     PID : 8.
2132     PINIT : $10.
2133     VDate : date9.
2134     VNum : 8.
2135     VType : $50.
2136     DocVer : 8.
2137     TrtCode : 8.

```

2138 TrtDesc : \$250.  
2139 StratumCode : 8.  
2140 StratumDesc : \$250.  
2141 RegDate : date9.  
2142 CentreCode : 8.  
2143 CentreName : \$250.  
2144 DocReceivedDate : date9.  
2145 DocEnteredDate : date9.  
2146 BiopsyDate : date9.  
2147 MRITargetedBiopsyResult : 8.  
2148 TissueSample : 8.  
2149 KITId : \$250.  
2150 BiopsyOperatorName : \$250.  
2151 GlobalGleason1 : 12.2  
2152 GlobalGleason2 : 12.2  
2153 GlobalGleasonScore : 12.2  
2154 PercentGleason : 12.2  
2155 TotalCoresSubmitted : 12.2  
2156 NumPositiveCores : 12.2  
2157 TumourVolume : 12.2  
2158 IDCCribriformPattern : 8.  
2159 PeriprostaticFatInvasion : 8.  
2160 SeminalVesicleInvasion : 8.  
2161 LymphVascularInvasion : 8.  
2162 PerineuralInvasion : 8.  
2163 CRFComment : \$250.  
2164 ;  
2165 FORMAT  
2166 VDATE date9.  
2167 REGDATE date9.  
2168 DOCRECEIVEDDATE date9.  
2169 DOCENTEREDDATE date9.  
2170 BiopsyDate dates3m9.  
2171 MRITargetedBiopsyResult T510X.  
2172 TissueSample truefals7.  
2173 GlobalGleason1 missing7.  
2174 GlobalGleason2 missing7.  
2175 GlobalGleasonScore missing7.  
2176 PercentGleason missing7.  
2177 TotalCoresSubmitted missing7.  
2178 NumPositiveCores missing7.  
2179 TumourVolume missing7.  
2180 IDCCribriformPattern T437X.  
2181 PeriprostaticFatInvasion T947X.  
2182 SeminalVesicleInvasion T947X.  
2183 LymphVascularInvasion T947X.  
2184 PerineuralInvasion T437X.  
2185 ;  
2186 LABEL  
2187 VisitCRFID = 'VisitCRFID'  
2188 PID = 'Patient ID'  
2189 PINIT = 'Patient Initials'  
2190 VDate = 'Visit Date'  
2191 VNum = 'Visit Number'  
2192 VType = 'Visit Type'  
2193 Docver = 'Document Version'  
2194 TrtCode = 'Treatment Code'  
2195 TrtDesc = 'Treatment Description'  
2196 StratumCode = 'Stratum Code'  
2197 StratumDesc = 'Stratum Description'  
2198 RegDate = 'Registration Date'

```

2199 CentreCode = 'Centre Code'
2200 CentreName = 'Centre Name'
2201 DocReceivedDate = 'Document Received Date'
2202 DocEnteredDate = 'Document Entered Date'
2203 BiopsyDate = 'BiopsyDate'
2204 MRITargetedBiopsyResult = 'MRITargetedBiopsyResult'
2205 TissueSample = 'TissueSample'
2206 KITId = 'KITId'
2207 BiopsyOperatorName = 'BiopsyOperatorName'
2208 GlobalGleason1 = 'GlobalGleason1'
2209 GlobalGleason2 = 'GlobalGleason2'
2210 GlobalGleasonScore = 'GlobalGleasonScore'
2211 PercentGleason = 'PercentGleason'
2212 TotalCoresSubmitted = 'TotalCoresSubmitted'
2213 NumPositiveCores = 'NumPositiveCores'
2214 TumourVolume = 'TumourVolume'
2215 IDCCribriiformPattern = 'IDCCribriiformPattern'
2216 PeriprostaticFatInvasion = 'PeriprostaticFatInvasion'
2217 SeminalVesicleInvasion = 'SeminalVesicleInvasion'
2218 LymphVascularInvasion = 'LymphVascularInvasion'
2219 PerineuralInvasion = 'PerineuralInvasion'
2220 CRFComment = 'CRFComment'
2221 ;
2222 RUN;

```

NOTE: The infile "W:/OCOG/PRECISION/data/May 2020/PRECISE\_TARGETEDMRI.dat" is:

```

Filename=W:\OCOG\PRECISION\data\May 2020\PRECISE_TARGETEDMRI.dat,
RECFM=V,LRECL=1102,File Size (bytes)=50160,
Last Modified=07May2020:11:51:49,
Create Time=07May2020:11:51:49

```

NOTE: 152 records were read from the infile "W:/OCOG/PRECISION/data/May 2020/PRECISE\_TARGETEDMRI.dat".

The minimum record length was 261.

The maximum record length was 1102.

NOTE: There were 152 observations read from the data set CWD.TARGETEDMRI.

NOTE: The data set WORK.TARGETEDMRI has 152 observations and 34 variables.

NOTE: DATA statement used (Total process time):

```

real time          0.07 seconds
cpu time           0.01 seconds

```

```

2223
2224 DATA targetedmri1;
2225     set cwd.TARGETEDMRI1;
2226 INFILE "&dir.PRECISE_TARGETEDMRI1.dat" LRECL=468 DSD DLM='^';
2227 MISSING A B C;
2228 INPUT
2229 VisitCRFID : 10.
2230 PID : 8.
2231 PINIT : $10.
2232 VDate : date9.
2233 VNum : 8.
2234 VType : $50.
2235 DocVer : 8.
2236 TrtCode : 8.
2237 TrtDesc : $250.
2238 StratumCode : 8.
2239 StratumDesc : $250.
2240 RegDate : date9.

```

```
2241 CentreCode : 8.
2242 CentreName : $250.
2243 DocReceivedDate : date9.
2244 DocEnteredDate : date9.
2245 RowNum : $50.
2246 Location1 : 8.
2247 Location2 : 8.
2248 TargetNum : 8.
2249 Location3 : 8.
2250 NonTumour : 8.
2251 GleasonScore : 12.2
2252 CoreInvolved : 12.2
2253 Gleason1 : 12.2
2254 Gleason2 : 12.2
2255 Cancer : 8.
2256 Comments : $250.
2257 OthSpecify : $250.
2258 OthSiteOthSpecify : $250.
2259 OthSiteNonTumour : 8.
2260 OthSiteComments : $250.
2261 OthSiteSpecify : $250.
2262 OthSiteGleasonScore : 12.2
2263 OthSiteCancer : 8.
2264 OthSiteCoreInvolved : 12.2
2265 OthSiteGleason2 : 12.2
2266 OthSiteTargetNum : 8.
2267 OthSiteGleason1 : 12.2
2268 ;
2269 FORMAT
2270 VDATE date9.
2271 REGDATE date9.
2272 DOCRECEIVEDDATE date9.
2273 DOCENTEREDDATE date9.
2274 RowNum $50.
2275 Location1 T980X.
2276 Location2 T981X.
2277 TargetNum T979X.
2278 Location3 T982X.
2279 NonTumour T948X.
2280 GleasonScore missing7.
2281 CoreInvolved missing7.
2282 Gleason1 missing7.
2283 Gleason2 missing7.
2284 Cancer truefals7.
2285 OthSiteNonTumour T948X.
2286 OthSiteGleasonScore missing7.
2287 OthSiteCancer truefals7.
2288 OthSiteCoreInvolved missing7.
2289 OthSiteGleason2 missing7.
2290 OthSiteTargetNum T979X.
2291 OthSiteGleason1 missing7.
2292 ;
2293 LABEL
2294 VisitCRFID = 'VisitCRFID'
2295 PID = 'Patient ID'
2296 PINIT = 'Patient Initials'
2297 VDate = 'Visit Date'
2298 VNum = 'Visit Number'
2299 VType = 'Visit Type'
2300 Docver = 'Document Version'
2301 TrtCode = 'Treatment Code'
```

```

2302 TrtDesc = 'Treatment Description'
2303 StratumCode = 'Stratum Code'
2304 StratumDesc = 'Stratum Description'
2305 RegDate = 'Registration Date'
2306 CentreCode = 'Centre Code'
2307 CentreName = 'Centre Name'
2308 DocReceivedDate = 'Document Received Date'
2309 DocEnteredDate = 'Document Entered Date'
2310 RowNum = 'RowNum'
2311 Location1 = 'Location1'
2312 Location2 = 'Location2'
2313 TargetNum = 'TargetNum'
2314 Location3 = 'Location3'
2315 NonTumour = 'NonTumour'
2316 GleasonScore = 'GleasonScore'
2317 CoreInvolved = 'CoreInvolved'
2318 Gleason1 = 'Gleason1'
2319 Gleason2 = 'Gleason2'
2320 Cancer = 'Cancer'
2321 Comments = 'Comments'
2322 OthSpecify = 'OthSpecify'
2323 OthSiteOthSpecify = 'OthSiteOthSpecify'
2324 OthSiteNonTumour = 'OthSiteNonTumour'
2325 OthSiteComments = 'OthSiteComments'
2326 OthSiteSpecify = 'OthSiteSpecify'
2327 OthSiteGleasonScore = 'OthSiteGleasonScore'
2328 OthSiteCancer = 'OthSiteCancer'
2329 OthSiteCoreInvolved = 'OthSiteCoreInvolved'
2330 OthSiteGleason2 = 'OthSiteGleason2'
2331 OthSiteTargetNum = 'OthSiteTargetNum'
2332 OthSiteGleason1 = 'OthSiteGleason1'
2333 ;
2334 RUN;

```

NOTE: The infile "W:/OCOG/PRECISION/data/May 2020/PRECISE\_TARGETEDMRI1.dat" is:

```

Filename=W:\OCOG\PRECISION\data\May 2020\PRECISE_TARGETEDMRI1.dat,
RECFM=V,LRECL=468,File Size (bytes)=302311,
Last Modified=07May2020:11:51:49,
Create Time=07May2020:11:51:49

```

NOTE: 889 records were read from the infile "W:/OCOG/PRECISION/data/May 2020/PRECISE\_TARGETEDMRI1.dat".

The minimum record length was 288.

The maximum record length was 468.

NOTE: There were 889 observations read from the data set CWD.TARGETEDMRI1.

NOTE: The data set WORK.TARGETEDMRI1 has 889 observations and 39 variables.

NOTE: DATA statement used (Total process time):

```

real time          0.10 seconds
cpu time           0.10 seconds

```

```

2335
2336 DATA treat;
2337     set cwd.TREAT;
2338     INFILE "&dir.PRECISE_TREAT.dat" LRECL=621 DSD DLM='^';
2339     MISSING A B C;
2340     INPUT
2341     VisitCRFID : 10.
2342     PID : 8.
2343     PINIT : $10.

```

2344 VDate : date9.  
2345 VNum : 8.  
2346 VType : \$50.  
2347 DocVer : 8.  
2348 TrtCode : 8.  
2349 TrtDesc : \$250.  
2350 StratumCode : 8.  
2351 StratumDesc : \$250.  
2352 RegDate : date9.  
2353 CentreCode : 8.  
2354 CentreName : \$250.  
2355 DocReceivedDate : date9.  
2356 DocEnteredDate : date9.  
2357 AssessmentDate : date9.  
2358 Result : 8.  
2359 BiopsyResultSpecify : 8.  
2360 FurtherDiagnosticTest : 8.  
2361 PSA : 8.  
2362 MRI : 8.  
2363 BiopsyTestSpecify : 8.  
2364 Biopsy : 8.  
2365 ASStartDate : date9.  
2366 ActiveSurveillance : 8.  
2367 RadicalTreatment : 8.  
2368 RadicalTreatmentSpecify : 8.  
2369 MITSpecifyDetails : 8.  
2370 MITSpecify : 8.  
2371 MIT : 8.  
2372 HormoneTherapy : 8.  
2373 HormoneSpecify : \$250.  
2374 OthTreatment : 8.  
2375 OthTreatmentSpecify : \$250.  
2376 AE : 8.  
2377 CRFComment : \$250.  
2378 ;  
2379 FORMAT  
2380 VDATE date9.  
2381 REGDATE date9.  
2382 DOCRECEIVEDDATE date9.  
2383 DOCENTEREDDATE date9.  
2384 AssessmentDate dates3m9.  
2385 Result T927X.  
2386 BiopsyResultSpecify T510X.  
2387 FurtherDiagnosticTest truefals7.  
2388 PSA truefals7.  
2389 MRI truefals7.  
2390 BiopsyTestSpecify T928X.  
2391 Biopsy truefals7.  
2392 ASStartDate dates3m9.  
2393 ActiveSurveillance truefals7.  
2394 RadicalTreatment truefals7.  
2395 RadicalTreatmentSpecify T929X.  
2396 MITSpecifyDetails T946X.  
2397 MITSpecify T930X.  
2398 MIT truefals7.  
2399 HormoneTherapy truefals7.  
2400 OthTreatment truefals7.  
2401 AE truefals7.  
2402 ;  
2403 LABEL  
2404 VisitCRFID = 'VisitCRFID'



```
2405 PID = 'Patient ID'
2406 PINIT = 'Patient Initials'
2407 VDate = 'Visit Date'
2408 VNum = 'Visit Number'
2409 VType = 'Visit Type'
2410 Docver = 'Document Version'
2411 TrtCode = 'Treatment Code'
2412 TrtDesc = 'Treatment Description'
2413 StratumCode = 'Stratum Code'
2414 StratumDesc = 'Stratum Description'
2415 RegDate = 'Registration Date'
2416 CentreCode = 'Centre Code'
2417 CentreName = 'Centre Name'
2418 DocReceivedDate = 'Document Received Date'
2419 DocEnteredDate = 'Document Entered Date'
2420 AssessmentDate = 'AssessmentDate'
2421 Result = 'Result'
2422 BiopsyResultSpecify = 'BiopsyResultSpecify'
2423 FurtherDiagnosticTest = 'FurtherDiagnosticTest'
2424 PSA = 'PSA'
2425 MRI = 'MRI'
2426 BiopsyTestSpecify = 'BiopsyTestSpecify'
2427 Biopsy = 'Biopsy'
2428 ASStartDate = 'ASStartDate'
2429 ActiveSurveillance = 'ActiveSurveillance'
2430 RadicalTreatment = 'RadicalTreatment'
2431 RadicalTreatmentSpecify = 'RadicalTreatmentSpecify'
2432 MITSpecifyDetails = 'MITSpecifyDetails'
2433 MITSpecify = 'MITSpecify'
2434 MIT = 'MIT'
2435 HormoneTherapy = 'HormoneTherapy'
2436 HormoneSpecify = 'HormoneSpecify'
2437 OthTreatment = 'OthTreatment'
2438 OthTreatmentSpecify = 'OthTreatmentSpecify'
2439 AE = 'AE'
2440 CRFComment = 'CRFComment'
2441 ;
2442 RUN;
```

NOTE: The infile "W:/OCOG/PRECISION/data/May 2020/PRECISE\_TREAT.dat" is:  
Filename=W:\OCOG\PRECISION\data\May 2020\PRECISE\_TREAT.dat,  
RECFM=V,LRECL=621,File Size (bytes)=126370,  
Last Modified=07May2020:11:51:49,  
Create Time=07May2020:11:51:49

NOTE: 409 records were read from the infile "W:/OCOG/PRECISION/data/May 2020/PRECISE\_TREAT.dat".

The minimum record length was 257.

The maximum record length was 621.

NOTE: There were 409 observations read from the data set CWD.TREAT.

NOTE: The data set WORK.TREAT has 409 observations and 37 variables.

NOTE: DATA statement used (Total process time):

real time 0.09 seconds

cpu time 0.07 seconds

```
2443
2444 DATA correlative;
2445     set cwd.CORRELATIVE;
2446 INFILE "&dir.PRECISE_CORRELATIVE.dat" LRECL=481 DSD DLM='^';
2447 MISSING A B C;
```

```
2448 INPUT
2449 VisitCRFID : 10.
2450 PID : 8.
2451 PINIT : $10.
2452 VDate : date9.
2453 VNum : 8.
2454 VType : $50.
2455 DocVer : 8.
2456 TrtCode : 8.
2457 TrtDesc : $250.
2458 StratumCode : 8.
2459 StratumDesc : $250.
2460 RegDate : date9.
2461 CentreCode : 8.
2462 CentreName : $250.
2463 DocReceivedDate : date9.
2464 DocEnteredDate : date9.
2465 BloodSample : 8.
2466 BloodSampleKITID : $250.
2467 BloodSampleDate : date9.
2468 UrineSample : 8.
2469 PREDRESample : 8.
2470 PREDREKITID : $250.
2471 PREDRESampleDate : date9.
2472 PostDRESample : 8.
2473 POSTDREKITID : $250.
2474 PostDRESampleDate : date9.
2475 SemenSample : 8.
2476 SemenSampleDate : date9.
2477 Comment : $250.
2478 CRFComment : $250.
2479 ;
2480 FORMAT
2481 VDATE date9.
2482 REGDATE date9.
2483 DOCRECEIVEDDATE date9.
2484 DOCENTEREDDATE date9.
2485 BloodSample truefals7.
2486 BloodSampleDate dates3m9.
2487 UrineSample truefals7.
2488 PREDRESample truefals7.
2489 PREDRESampleDate dates3m9.
2490 PostDRESample truefals7.
2491 PostDRESampleDate dates3m9.
2492 SemenSample truefals7.
2493 SemenSampleDate dates3m9.
2494 ;
2495 LABEL
2496 VisitCRFID = 'VisitCRFID'
2497 PID = 'Patient ID'
2498 PINIT = 'Patient Initials'
2499 VDate = 'Visit Date'
2500 VNum = 'Visit Number'
2501 VType = 'Visit Type'
2502 Docver = 'Document Version'
2503 TrtCode = 'Treatment Code'
2504 TrtDesc = 'Treatment Description'
2505 StratumCode = 'Stratum Code'
2506 StratumDesc = 'Stratum Description'
2507 RegDate = 'Registration Date'
2508 CentreCode = 'Centre Code'
```

```
2509 CentreName = 'Centre Name'
2510 DocReceivedDate = 'Document Received Date'
2511 DocEnteredDate = 'Document Entered Date'
2512 BloodSample = 'BloodSample'
2513 BloodSampleKITID = 'BloodSampleKITID'
2514 BloodSampleDate = 'BloodSampleDate'
2515 UrineSample = 'UrineSample'
2516 PREDRESample = 'PREDRESample'
2517 PREDREKITID = 'PREDREKITID'
2518 PREDRESampleDate = 'PREDRESampleDate'
2519 PostDRESample = 'PostDRESample'
2520 POSTDREKITID = 'POSTDREKITID'
2521 PostDRESampleDate = 'PostDRESampleDate'
2522 SemenSample = 'SemenSample'
2523 SemenSampleDate = 'SemenSampleDate'
2524 Comment = 'Comment'
2525 CRFComment = 'CRFComment'
2526 ;
2527 RUN;
```

NOTE: The infile "W:/OCOG/PRECISION/data/May 2020/PRECISE\_CORRELATIVE.dat" is:

```
Filename=W:\OCOG\PRECISION\data\May 2020\PRECISE_CORRELATIVE.dat,
RECFM=V,LRECL=481,File Size (bytes)=327709,
Last Modified=07May2020:11:51:49,
Create Time=07May2020:11:51:49
```

NOTE: 1054 records were read from the infile "W:/OCOG/PRECISION/data/May 2020/PRECISE\_CORRELATIVE.dat".

The minimum record length was 243.

The maximum record length was 481.

NOTE: There were 1054 observations read from the data set CWD.CORRELATIVE.

NOTE: The data set WORK.CORRELATIVE has 1054 observations and 30 variables.

NOTE: DATA statement used (Total process time):

```
real time          0.10 seconds
cpu time           0.06 seconds
```

```
2528
2529 DATA ca;
2530     set cwd.CA;
2531 INFILE "&dir.PRECISE_CA.dat" LRECL=732 DSD DLM='^';
2532 MISSING A B C;
2533 INPUT
2534 VisitCRFID : 10.
2535 PID : 8.
2536 PINIT : $10.
2537 VDate : date9.
2538 VNum : 8.
2539 VType : $50.
2540 DocVer : 8.
2541 TrtCode : 8.
2542 TrtDesc : $250.
2543 StratumCode : 8.
2544 StratumDesc : $250.
2545 RegDate : date9.
2546 CentreCode : 8.
2547 CentreName : $250.
2548 DocReceivedDate : date9.
2549 DocEnteredDate : date9.
2550 AssessmentDate : date9.
```

2551 Height : 12.2  
2552 Weight : 12.2  
2553 BPSystolic : 12.2  
2554 BPDiastolic : 12.2  
2555 HeartRate : 12.2  
2556 ECOG : 12.2  
2557 DigitalRectalExam : 8.  
2558 Enlargement : 8.  
2559 Size\_2 : 8.  
2560 Size : 8.  
2561 PalpableTumour : 8.  
2562 ReceiveTreat : 8.  
2563 ActiveSurveillance : 8.  
2564 MRI : 8.  
2565 ASEndedDate : date9.  
2566 MRIReason : \$250.  
2567 ProgressionCancer : 8.  
2568 US : 8.  
2569 Radiology : 8.  
2570 USReason : \$250.  
2571 ProstateBiopsy\_2 : 8.  
2572 ProstateBiopsy : 8.  
2573 ProstageBiopsyDate : date9.  
2574 BiopsyResult : 8.  
2575 GleasonScore1 : 12.2  
2576 GleasonScore2 : 12.2  
2577 GleasonScoreResult : 12.2  
2578 BiopsyDetails : 8.  
2579 MRIPriorFUPBiopsy : 8.  
2580 FUPBiopsy : 8.  
2581 FUPBiopsyReason : \$250.  
2582 AE : 8.  
2583 CRFComment : \$250.  
2584 ;  
2585 FORMAT  
2586 VDATE date9.  
2587 REGDATE date9.  
2588 DOCRECEIVEDDATE date9.  
2589 DOCENTEREDDATE date9.  
2590 AssessmentDate dates3m9.  
2591 Height missing7.  
2592 Weight missing7.  
2593 BPSystolic missing7.  
2594 BPDiastolic missing7.  
2595 HeartRate missing7.  
2596 ECOG missing7.  
2597 DigitalRectalExam T763X.  
2598 Enlargement T954X.  
2599 Size\_2 T1087X.  
2600 Size T955X.  
2601 PalpableTumour T956X.  
2602 ReceiveTreat T756X.  
2603 ActiveSurveillance truefals7.  
2604 MRI T756X.  
2605 ASEndedDate dates3m9.  
2606 ProgressionCancer truefals7.  
2607 US T756X.  
2608 Radiology truefals7.  
2609 ProstateBiopsy\_2 T756X.  
2610 ProstateBiopsy truefals7.  
2611 ProstageBiopsyDate dates3m9.

```
2612 BiopsyResult T1086X.
2613 GleasonScore1 missing7.
2614 GleasonScore2 missing7.
2615 GleasonScoreResult missing7.
2616 BiopsyDetails T931X.
2617 MRIPriorFUPBiopsy truefals7.
2618 FUPBiopsy truefals7.
2619 AE truefals7.
2620 ;
2621 LABEL
2622 VisitCRFID = 'VisitCRFID'
2623 PID = 'Patient ID'
2624 PINIT = 'Patient Initials'
2625 VDate = 'Visit Date'
2626 VNum = 'Visit Number'
2627 VType = 'Visit Type'
2628 Docver = 'Document Version'
2629 TrtCode = 'Treatment Code'
2630 TrtDesc = 'Treatment Description'
2631 StratumCode = 'Stratum Code'
2632 StratumDesc = 'Stratum Description'
2633 RegDate = 'Registration Date'
2634 CentreCode = 'Centre Code'
2635 CentreName = 'Centre Name'
2636 DocReceivedDate = 'Document Received Date'
2637 DocEnteredDate = 'Document Entered Date'
2638 AssessmentDate = 'AssessmentDate'
2639 Height = 'Height'
2640 Weight = 'Weight'
2641 BPSystolic = 'BPSystolic'
2642 BPDiastolic = 'BPDiastolic'
2643 HeartRate = 'HeartRate'
2644 ECOG = 'ECOG'
2645 DigitalRectalExam = 'DigitalRectalExam'
2646 Enlargement = 'Enlargement'
2647 Size_2 = 'Size_2'
2648 Size = 'Size'
2649 PalpableTumour = 'PalpableTumour'
2650 ReceiveTreat = 'ReceiveTreat'
2651 ActiveSurveillance = 'ActiveSurveillance'
2652 MRI = 'MRI'
2653 ASEndedDate = 'ASEndedDate'
2654 MRIReason = 'MRIReason'
2655 ProgressionCancer = 'ProgressionCancer'
2656 US = 'US'
2657 Radiology = 'Radiology'
2658 USReason = 'USReason'
2659 ProstateBiopsy_2 = 'ProstateBiopsy_2'
2660 ProstateBiopsy = 'ProstateBiopsy'
2661 ProstageBiopsyDate = 'ProstageBiopsyDate'
2662 BiopsyResult = 'BiopsyResult'
2663 GleasonScore1 = 'GleasonScore1'
2664 GleasonScore2 = 'GleasonScore2'
2665 GleasonScoreResult = 'GleasonScoreResult'
2666 BiopsyDetails = 'BiopsyDetails'
2667 MRIPriorFUPBiopsy = 'MRIPriorFUPBiopsy'
2668 FUPBiopsy = 'FUPBiopsy'
2669 FUPBiopsyReason = 'FUPBiopsyReason'
2670 AE = 'AE'
2671 CRFComment = 'CRFComment'
2672 ;
```

2673 RUN;

NOTE: The infile "W:/OCOG/PRECISION/data/May 2020/PRECISE\_CA.dat" is:  
Filename=W:\OCOG\PRECISION\data\May 2020\PRECISE\_CA.dat,  
RECFM=V,LRECL=732,File Size (bytes)=264599,  
Last Modified=07May2020:11:51:49,  
Create Time=07May2020:11:51:49

NOTE: 792 records were read from the infile "W:/OCOG/PRECISION/data/May 2020/PRECISE\_CA.dat".

The minimum record length was 272.

The maximum record length was 732.

NOTE: There were 792 observations read from the data set CWD.CA.

NOTE: The data set WORK.CA has 792 observations and 50 variables.

NOTE: DATA statement used (Total process time):

real time 0.12 seconds

cpu time 0.04 seconds

2674

2675 DATA cal;

2676 set cwd.CA1;

2677 INFILE "&dir.PRECISE\_CA1.dat" LRECL=304 DSD DLM='^';

2678 MISSING A B C;

2679 INPUT

2680 VisitCRFID : 10.

2681 PID : 8.

2682 PINIT : \$10.

2683 VDate : date9.

2684 VNum : 8.

2685 VType : \$50.

2686 DocVer : 8.

2687 TrtCode : 8.

2688 TrtDesc : \$250.

2689 StratumCode : 8.

2690 StratumDesc : \$250.

2691 RegDate : date9.

2692 CentreCode : 8.

2693 CentreName : \$250.

2694 DocReceivedDate : date9.

2695 DocEnteredDate : date9.

2696 RowNum : \$50.

2697 RadExamMethod : 8.

2698 RadExamResult : 8.

2699 RadExamMethodSpecify : \$250.

2700 RadExamDate : date9.

2701 ;

2702 FORMAT

2703 VDATE date9.

2704 REGDATE date9.

2705 DOCRECEIVEDDATE date9.

2706 DOCENTEREDDATE date9.

2707 RowNum \$50.

2708 RadExamMethod T957X.

2709 RadExamResult T512X.

2710 RadExamDate dates3m9.

2711 ;

2712 LABEL

2713 VisitCRFID = 'VisitCRFID'

2714 PID = 'Patient ID'

2715 PINIT = 'Patient Initials'

```
2716 VDate = 'Visit Date'
2717 VNum = 'Visit Number'
2718 VType = 'Visit Type'
2719 Docver = 'Document Version'
2720 TrtCode = 'Treatment Code'
2721 TrtDesc = 'Treatment Description'
2722 StratumCode = 'Stratum Code'
2723 StratumDesc = 'Stratum Description'
2724 RegDate = 'Registration Date'
2725 CentreCode = 'Centre Code'
2726 CentreName = 'Centre Name'
2727 DocReceivedDate = 'Document Received Date'
2728 DocEnteredDate = 'Document Entered Date'
2729 RowNum = 'RowNum'
2730 RadExamMethod = 'RadExamMethod'
2731 RadExamResult = 'RadExamResult'
2732 RadExamMethodSpecify = 'RadExamMethodSpecify'
2733 RadExamDate = 'RadExamDate'
2734 ;
2735 RUN;
```

NOTE: The infile "W:/OCOG/PRECISION/data/May 2020/PRECISE\_CA1.dat" is:  
Filename=W:\OCOG\PRECISION\data\May 2020\PRECISE\_CA1.dat,  
RECFM=V,LRECL=304,File Size (bytes)=17864,  
Last Modified=07May2020:11:51:49,  
Create Time=07May2020:11:51:49

NOTE: 64 records were read from the infile "W:/OCOG/PRECISION/data/May 2020/PRECISE\_CA1.dat".

The minimum record length was 250.

The maximum record length was 304.

NOTE: There were 64 observations read from the data set CWD.CA1.

NOTE: The data set WORK.CA1 has 64 observations and 21 variables.

NOTE: DATA statement used (Total process time):

real time 0.07 seconds

cpu time 0.04 seconds

```
2736
2737 DATA intervention;
2738     set cwd.INTERVENTION;
2739 INFILE "&dir.PRECISE_INTERVENTION.dat" LRECL=457 DSD DLM='^';
2740 MISSING A B C;
2741 INPUT
2742 VisitCRFID : 10.
2743 PID : 8.
2744 PINIT : $10.
2745 VDate : date9.
2746 VNum : 8.
2747 VType : $50.
2748 DocVer : 8.
2749 TrtCode : 8.
2750 TrtDesc : $250.
2751 StratumCode : 8.
2752 StratumDesc : $250.
2753 RegDate : date9.
2754 CentreCode : 8.
2755 CentreName : $250.
2756 DocReceivedDate : date9.
2757 DocEnteredDate : date9.
2758 ActiveSurveillance : 8.
```

```
2759 ASStartDate : date9.
2760 ASStopDate : date9.
2761 AssessmentDate : date9.
2762 ProstateRelatedIntervention : 8.
2763 ADR : 8.
2764 Chemotherapy : 8.
2765 Radiotherapy : 8.
2766 Surgery : 8.
2767 MinimallyInvasive : 8.
2768 HormonalTherapy : 8.
2769 CRFComment : $250.
2770 ;
2771 FORMAT
2772 VDATE date9.
2773 REGDATE date9.
2774 DOCRECEIVEDDATE date9.
2775 DOCENTEREDDATE date9.
2776 ActiveSurveillance truefals7.
2777 ASStartDate dates3m9.
2778 ASStopDate dates3m9.
2779 AssessmentDate dates3m9.
2780 ProstateRelatedIntervention truefals7.
2781 ADR truefals7.
2782 Chemotherapy truefals7.
2783 Radiotherapy truefals7.
2784 Surgery truefals7.
2785 MinimallyInvasive truefals7.
2786 HormonalTherapy truefals7.
2787 ;
2788 LABEL
2789 VisitCRFID = 'VisitCRFID'
2790 PID = 'Patient ID'
2791 PINIT = 'Patient Initials'
2792 VDate = 'Visit Date'
2793 VNum = 'Visit Number'
2794 VType = 'Visit Type'
2795 Docver = 'Document Version'
2796 TrtCode = 'Treatment Code'
2797 TrtDesc = 'Treatment Description'
2798 StratumCode = 'Stratum Code'
2799 StratumDesc = 'Stratum Description'
2800 RegDate = 'Registration Date'
2801 CentreCode = 'Centre Code'
2802 CentreName = 'Centre Name'
2803 DocReceivedDate = 'Document Received Date'
2804 DocEnteredDate = 'Document Entered Date'
2805 ActiveSurveillance = 'ActiveSurveillance'
2806 ASStartDate = 'ASStartDate'
2807 ASStopDate = 'ASStopDate'
2808 AssessmentDate = 'AssessmentDate'
2809 ProstateRelatedIntervention = 'ProstateRelatedIntervention'
2810 ADR = 'ADR'
2811 Chemotherapy = 'Chemotherapy'
2812 Radiotherapy = 'Radiotherapy'
2813 Surgery = 'Surgery'
2814 MinimallyInvasive = 'MinimallyInvasive'
2815 HormonalTherapy = 'HormonalTherapy'
2816 CRFComment = 'CRFComment'
2817 ;
2818 RUN;
```



NOTE: The infile "W:/OCOG/PRECISION/data/May 2020/PRECISE\_INTERVENTION.dat" is:

Filename=W:\OCOG\PRECISION\data\May 2020\PRECISE\_INTERVENTION.dat,  
RECFM=V,LRECL=457,File Size (bytes)=47589,  
Last Modified=07May2020:11:51:49,  
Create Time=07May2020:11:51:49

NOTE: 172 records were read from the infile "W:/OCOG/PRECISION/data/May 2020/PRECISE\_INTERVENTION.dat".

The minimum record length was 224.

The maximum record length was 457.

NOTE: There were 172 observations read from the data set CWD.INTERVENTION.

NOTE: The data set WORK.INTERVENTION has 172 observations and 28 variables.

NOTE: DATA statement used (Total process time):

real time 0.06 seconds

cpu time 0.01 seconds

```
2819
2820 DATA intervention1;
2821     set cwd.INTERVENTION1;
2822 INFILE "&dir.PRECISE_INTERVENTION1.dat" LRECL=344 DSD DLM='^';
2823 MISSING A B C;
2824 INPUT
2825 VisitCRFID : 10.
2826 PID : 8.
2827 PINIT : $10.
2828 VDate : date9.
2829 VNum : 8.
2830 VType : $50.
2831 DocVer : 8.
2832 TrtCode : 8.
2833 TrtDesc : $250.
2834 StratumCode : 8.
2835 StratumDesc : $250.
2836 RegDate : date9.
2837 CentreCode : 8.
2838 CentreName : $250.
2839 DocReceivedDate : date9.
2840 DocEnteredDate : date9.
2841 RowNum : $50.
2842 ADRRegimen : $250.
2843 ADRRegimenStartDate : date9.
2844 ADRRegimenStopDate : date9.
2845 ;
2846 FORMAT
2847 VDATE date9.
2848 REGDATE date9.
2849 DOCRECEIVEDDATE date9.
2850 DOCENTEREDDATE date9.
2851 RowNum $50.
2852 ADRRegimenStartDate dates3m9.
2853 ADRRegimenStopDate dates3m9.
2854 ;
2855 LABEL
2856 VisitCRFID = 'VisitCRFID'
2857 PID = 'Patient ID'
2858 PINIT = 'Patient Initials'
2859 VDate = 'Visit Date'
2860 VNum = 'Visit Number'
2861 VType = 'Visit Type'
```

```
2862 Docver = 'Document Version'
2863 TrtCode = 'Treatment Code'
2864 TrtDesc = 'Treatment Description'
2865 StratumCode = 'Stratum Code'
2866 StratumDesc = 'Stratum Description'
2867 RegDate = 'Registration Date'
2868 CentreCode = 'Centre Code'
2869 CentreName = 'Centre Name'
2870 DocReceivedDate = 'Document Received Date'
2871 DocEnteredDate = 'Document Entered Date'
2872 RowNum = 'RowNum'
2873 ADRRegimen = 'ADRRegimen'
2874 ADRRegimenStartDate = 'ADRRegimenStartDate'
2875 ADRRegimenStopDate = 'ADRRegimenStopDate'
2876 ;
2877 RUN;
```

NOTE: The infile "W:/OCOG/PRECISION/data/May 2020/PRECISE\_INTERVENTION1.dat" is:  
Filename=W:\OCOG\PRECISION\data\May 2020\PRECISE\_INTERVENTION1.dat,  
RECFM=V,LRECL=344,File Size (bytes)=53813,  
Last Modified=07May2020:11:51:49,  
Create Time=07May2020:11:51:49

NOTE: 192 records were read from the infile "W:/OCOG/PRECISION/data/May 2020/PRECISE\_INTERVENTION1.dat".

The minimum record length was 241.

The maximum record length was 344.

NOTE: There were 192 observations read from the data set CWD.INTERVENTION1.

NOTE: The data set WORK.INTERVENTION1 has 192 observations and 20 variables.

NOTE: DATA statement used (Total process time):  
real time 0.03 seconds  
cpu time 0.01 seconds

```
2878
2879 DATA intervention2;
2880     set cwd.INTERVENTION2;
2881     INFILE "&dir.PRECISE_INTERVENTION2.dat" LRECL=302 DSD DLM='^';
2882     MISSING A B C;
2883     INPUT
2884     VisitCRFID : 10.
2885     PID : 8.
2886     PINIT : $10.
2887     VDate : date9.
2888     VNum : 8.
2889     VType : $50.
2890     DocVer : 8.
2891     TrtCode : 8.
2892     TrtDesc : $250.
2893     StratumCode : 8.
2894     StratumDesc : $250.
2895     RegDate : date9.
2896     CentreCode : 8.
2897     CentreName : $250.
2898     DocReceivedDate : date9.
2899     DocEnteredDate : date9.
2900     RowNum : $50.
2901     ChemoRegimen : $250.
2902     ChemoRegimenStartDate : date9.
```

```

2903 ChemoRegimenStopDate : date9.
2904 ;
2905 FORMAT
2906 VDATE date9.
2907 REGDATE date9.
2908 DOCRECEIVEDDATE date9.
2909 DOCENTEREDDATE date9.
2910 RowNum $50.
2911 ChemoRegimenStartDate dates3m9.
2912 ChemoRegimenStopDate dates3m9.
2913 ;
2914 LABEL
2915 VisitCRFID = 'VisitCRFID'
2916 PID = 'Patient ID'
2917 PINIT = 'Patient Initials'
2918 VDate = 'Visit Date'
2919 VNum = 'Visit Number'
2920 VType = 'Visit Type'
2921 Docver = 'Document Version'
2922 TrtCode = 'Treatment Code'
2923 TrtDesc = 'Treatment Description'
2924 StratumCode = 'Stratum Code'
2925 StratumDesc = 'Stratum Description'
2926 RegDate = 'Registration Date'
2927 CentreCode = 'Centre Code'
2928 CentreName = 'Centre Name'
2929 DocReceivedDate = 'Document Received Date'
2930 DocEnteredDate = 'Document Entered Date'
2931 RowNum = 'RowNum'
2932 ChemoRegimen = 'ChemoRegimen'
2933 ChemoRegimenStartDate = 'ChemoRegimenStartDate'
2934 ChemoRegimenStopDate = 'ChemoRegimenStopDate'
2935 ;
2936 RUN;

```

```

NOTE: The infile "W:/OCOG/PRECISION/data/May
2020/PRECISE_INTERVENTION2.dat" is:
  Filename=W:\OCOG\PRECISION\data\May 2020\PRECISE_INTERVENTION2.dat,
  RECFM=V,LRECL=302,File Size (bytes)=47328,
  Last Modified=07May2020:11:51:49,
  Create Time=07May2020:11:51:49

```

```

NOTE: 172 records were read from the infile "W:/OCOG/PRECISION/data/May
2020/PRECISE_INTERVENTION2.dat".
  The minimum record length was 241.
  The maximum record length was 302.

```

```

NOTE: There were 172 observations read from the data set CWD.INTERVENTION2.
NOTE: The data set WORK.INTERVENTION2 has 172 observations and 20
variables.

```

```

NOTE: DATA statement used (Total process time):
  real time          0.03 seconds
  cpu time           0.00 seconds

```

```

2937
2938 DATA intervention3;
2939   set cwd.INTERVENTION3;
2940 INFILE "&dir.PRECISE_INTERVENTION3.dat" LRECL=392 DSD DLM='^';
2941 MISSING A B C;
2942 INPUT
2943 VisitCRFID : 10.

```

```

2944 PID : 8.
2945 PINIT : $10.
2946 VDate : date9.
2947 VNum : 8.
2948 VType : $50.
2949 DocVer : 8.
2950 TrtCode : 8.
2951 TrtDesc : $250.
2952 StratumCode : 8.
2953 StratumDesc : $250.
2954 RegDate : date9.
2955 CentreCode : 8.
2956 CentreName : $250.
2957 DocReceivedDate : date9.
2958 DocEnteredDate : date9.
2959 RowNum : $50.
2960 RadiotherapyType : 8.
2961 RadiotherapyTotalDose : 12.2
2962 OthRadiotherapyTypeSpecify : $250.
2963 RadiotherapyStartDate : date9.
2964 RadiotherapyStopDate : date9.
2965 ;
2966 FORMAT
2967 VDATE date9.
2968 REGDATE date9.
2969 DOCRECEIVEDDATE date9.
2970 DOCENTEREDDATE date9.
2971 RowNum $50.
2972 RadiotherapyType T933X.
2973 RadiotherapyTotalDose missing7.
2974 RadiotherapyStartDate dates3m9.
2975 RadiotherapyStopDate dates3m9.
2976 ;
2977 LABEL
2978 VisitCRFID = 'VisitCRFID'
2979 PID = 'Patient ID'
2980 PINIT = 'Patient Initials'
2981 VDate = 'Visit Date'
2982 VNum = 'Visit Number'
2983 VType = 'Visit Type'
2984 Docver = 'Document Version'
2985 TrtCode = 'Treatment Code'
2986 TrtDesc = 'Treatment Description'
2987 StratumCode = 'Stratum Code'
2988 StratumDesc = 'Stratum Description'
2989 RegDate = 'Registration Date'
2990 CentreCode = 'Centre Code'
2991 CentreName = 'Centre Name'
2992 DocReceivedDate = 'Document Received Date'
2993 DocEnteredDate = 'Document Entered Date'
2994 RowNum = 'RowNum'
2995 RadiotherapyType = 'RadiotherapyType'
2996 RadiotherapyTotalDose = 'RadiotherapyTotalDose'
2997 OthRadiotherapyTypeSpecify = 'OthRadiotherapyTypeSpecify'
2998 RadiotherapyStartDate = 'RadiotherapyStartDate'
2999 RadiotherapyStopDate = 'RadiotherapyStopDate'
3000 ;
3001 RUN;

```

NOTE: The infile "W:/OCOG/PRECISION/data/May  
2020/PRECISE\_INTERVENTION3.dat" is:

Filename=W:\OCOG\PRECISION\data\May 2020\PRECISE\_INTERVENTION3.dat,  
RECFM=V,LRECL=392,File Size (bytes)=50637,  
Last Modified=07May2020:11:51:49,  
Create Time=07May2020:11:51:49

NOTE: 177 records were read from the infile "W:/OCOG/PRECISION/data/May 2020/PRECISE\_INTERVENTION3.dat".

The minimum record length was 245.

The maximum record length was 392.

NOTE: There were 177 observations read from the data set CWD.INTERVENTION3.

NOTE: The data set WORK.INTERVENTION3 has 177 observations and 22 variables.

NOTE: DATA statement used (Total process time):

real time 0.04 seconds

cpu time 0.03 seconds

```
3002
3003 DATA intervention4;
3004     set cwd.INTERVENTION4;
3005 INFILE "&dir.PRECISE_INTERVENTION4.dat" LRECL=431 DSD DLM='^';
3006 MISSING A B C;
3007 INPUT
3008 VisitCRFID : 10.
3009 PID : 8.
3010 PINIT : $10.
3011 VDate : date9.
3012 VNum : 8.
3013 VType : $50.
3014 DocVer : 8.
3015 TrtCode : 8.
3016 TrtDesc : $250.
3017 StratumCode : 8.
3018 StratumDesc : $250.
3019 RegDate : date9.
3020 CentreCode : 8.
3021 CentreName : $250.
3022 DocReceivedDate : date9.
3023 DocEnteredDate : date9.
3024 RowNum : $50.
3025 GleasonScore2 : 12.2
3026 GleasonScore1 : 12.2
3027 GleasonScoreResult : 12.2
3028 SurgeryType : 8.
3029 OthHistologicalTypeSpecify : $250.
3030 OthSurgeryTypeSpecify : $250.
3031 SurgeryDate : date9.
3032 HistologicalType : 8.
3033 ;
3034 FORMAT
3035 VDATE date9.
3036 REGDATE date9.
3037 DOCRECEIVEDDATE date9.
3038 DOCENTEREDDATE date9.
3039 RowNum $50.
3040 GleasonScore2 missing7.
3041 GleasonScore1 missing7.
3042 GleasonScoreResult missing7.
3043 SurgeryType T934X.
3044 SurgeryDate dates3m9.
3045 HistologicalType T692X.
```

```
3046 ;
3047 LABEL
3048 VisitCRFID = 'VisitCRFID'
3049 PID = 'Patient ID'
3050 PINIT = 'Patient Initials'
3051 VDate = 'Visit Date'
3052 VNum = 'Visit Number'
3053 VType = 'Visit Type'
3054 Docver = 'Document Version'
3055 TrtCode = 'Treatment Code'
3056 TrtDesc = 'Treatment Description'
3057 StratumCode = 'Stratum Code'
3058 StratumDesc = 'Stratum Description'
3059 RegDate = 'Registration Date'
3060 CentreCode = 'Centre Code'
3061 CentreName = 'Centre Name'
3062 DocReceivedDate = 'Document Received Date'
3063 DocEnteredDate = 'Document Entered Date'
3064 RowNum = 'RowNum'
3065 GleasonScore2 = 'GleasonScore2'
3066 GleasonScore1 = 'GleasonScore1'
3067 GleasonScoreResult = 'GleasonScoreResult'
3068 SurgeryType = 'SurgeryType'
3069 OthHistologicalTypeSpecify = 'OthHistologicalTypeSpecify'
3070 OthSurgeryTypeSpecify = 'OthSurgeryTypeSpecify'
3071 SurgeryDate = 'SurgeryDate'
3072 HistologicalType = 'HistologicalType'
3073 ;
3074 RUN;
```

NOTE: The infile "W:/OCOG/PRECISION/data/May 2020/PRECISE\_INTERVENTION4.dat" is:  
Filename=W:\OCOG\PRECISION\data\May 2020\PRECISE\_INTERVENTION4.dat,  
RECFM=V,LRECL=431,File Size (bytes)=52352,  
Last Modified=07May2020:11:51:49,  
Create Time=07May2020:11:51:49

NOTE: 174 records were read from the infile "W:/OCOG/PRECISION/data/May 2020/PRECISE\_INTERVENTION4.dat".  
The minimum record length was 251.  
The maximum record length was 431.

NOTE: There were 174 observations read from the data set CWD.INTERVENTION4.  
NOTE: The data set WORK.INTERVENTION4 has 174 observations and 25 variables.

NOTE: DATA statement used (Total process time):  
real time 0.04 seconds  
cpu time 0.03 seconds

```
3075
3076 DATA intervention5;
3077     set cwd.INTERVENTION5;
3078 INFILE "&dir.PRECISE_INTERVENTION5.dat" LRECL=321 DSD DLM='^';
3079 MISSING A B C;
3080 INPUT
3081 VisitCRFID : 10.
3082 PID : 8.
3083 PINIT : $10.
3084 VDate : date9.
3085 VNum : 8.
3086 VType : $50.
```

```

3087 DocVer : 8.
3088 TrtCode : 8.
3089 TrtDesc : $250.
3090 StratumCode : 8.
3091 StratumDesc : $250.
3092 RegDate : date9.
3093 CentreCode : 8.
3094 CentreName : $250.
3095 DocReceivedDate : date9.
3096 DocEnteredDate : date9.
3097 RowNum : $50.
3098 MITTypeDetails : 8.
3099 MITType : 8.
3100 OthMITTypeSpecify : $250.
3101 MITStartDate : date9.
3102 MITStopDate : date9.
3103 ;
3104 FORMAT
3105 VDATE date9.
3106 REGDATE date9.
3107 DOCRECEIVEDDATE date9.
3108 DOCENTEREDDATE date9.
3109 RowNum $50.
3110 MITTypeDetails T946X.
3111 MITType T935X.
3112 MITStartDate dates3m9.
3113 MITStopDate dates3m9.
3114 ;
3115 LABEL
3116 VisitCRFID = 'VisitCRFID'
3117 PID = 'Patient ID'
3118 PINIT = 'Patient Initials'
3119 VDate = 'Visit Date'
3120 VNum = 'Visit Number'
3121 VType = 'Visit Type'
3122 Docver = 'Document Version'
3123 TrtCode = 'Treatment Code'
3124 TrtDesc = 'Treatment Description'
3125 StratumCode = 'Stratum Code'
3126 StratumDesc = 'Stratum Description'
3127 RegDate = 'Registration Date'
3128 CentreCode = 'Centre Code'
3129 CentreName = 'Centre Name'
3130 DocReceivedDate = 'Document Received Date'
3131 DocEnteredDate = 'Document Entered Date'
3132 RowNum = 'RowNum'
3133 MITTypeDetails = 'MITTypeDetails'
3134 MITType = 'MITType'
3135 OthMITTypeSpecify = 'OthMITTypeSpecify'
3136 MITStartDate = 'MITStartDate'
3137 MITStopDate = 'MITStopDate'
3138 ;
3139 RUN;

```

NOTE: The infile "W:/OCOG/PRECISION/data/May 2020/PRECISE\_INTERVENTION5.dat" is:  
 Filename=W:\OCOG\PRECISION\data\May 2020\PRECISE\_INTERVENTION5.dat,  
 RECFM=V,LRECL=321,File Size (bytes)=48160,  
 Last Modified=07May2020:11:51:49,  
 Create Time=07May2020:11:51:49

NOTE: 172 records were read from the infile "W:/OCOG/PRECISION/data/May 2020/PRECISE\_INTERVENTION5.dat".

The minimum record length was 245.

The maximum record length was 321.

NOTE: There were 172 observations read from the data set CWD.INTERVENTION5.

NOTE: The data set WORK.INTERVENTION5 has 172 observations and 22 variables.

NOTE: DATA statement used (Total process time):

real time 0.06 seconds

cpu time 0.04 seconds

3140

3141 DATA intervention6;

3142 set cwd.INTERVENTION6;

3143 INFILE "&dir.PRECISE\_INTERVENTION6.dat" LRECL=319 DSD DLM='^';

3144 MISSING A B C;

3145 INPUT

3146 VisitCRFID : 10.

3147 PID : 8.

3148 PINIT : \$10.

3149 VDate : date9.

3150 VNum : 8.

3151 VType : \$50.

3152 DocVer : 8.

3153 TrtCode : 8.

3154 TrtDesc : \$250.

3155 StratumCode : 8.

3156 StratumDesc : \$250.

3157 RegDate : date9.

3158 CentreCode : 8.

3159 CentreName : \$250.

3160 DocReceivedDate : date9.

3161 DocEnteredDate : date9.

3162 RowNum : \$50.

3163 HormonalTherapyType : \$250.

3164 HormonalTherapyTypeStartDate : date9.

3165 HormonalTherapyStopDate : date9.

3166 ;

3167 FORMAT

3168 VDATE date9.

3169 REGDATE date9.

3170 DOCRECEIVEDDATE date9.

3171 DOCENTEREDDATE date9.

3172 RowNum \$50.

3173 HormonalTherapyTypeStartDate dates3m9.

3174 HormonalTherapyStopDate dates3m9.

3175 ;

3176 LABEL

3177 VisitCRFID = 'VisitCRFID'

3178 PID = 'Patient ID'

3179 PINIT = 'Patient Initials'

3180 VDate = 'Visit Date'

3181 VNum = 'Visit Number'

3182 VType = 'Visit Type'

3183 Docver = 'Document Version'

3184 TrtCode = 'Treatment Code'

3185 TrtDesc = 'Treatment Description'

3186 StratumCode = 'Stratum Code'

3187 StratumDesc = 'Stratum Description'

3188 RegDate = 'Registration Date'



```
3189 CentreCode = 'Centre Code'
3190 CentreName = 'Centre Name'
3191 DocReceivedDate = 'Document Received Date'
3192 DocEnteredDate = 'Document Entered Date'
3193 RowNum = 'RowNum'
3194 HormonalTherapyType = 'HormonalTherapyType'
3195 HormonalTherapyTypeStartDate = 'HormonalTherapyTypeStartDate'
3196 HormonalTherapyStopDate = 'HormonalTherapyStopDate'
3197 ;
3198 RUN;
```

NOTE: The infile "W:/OCOG/PRECISION/data/May  
2020/PRECISE\_INTERVENTION6.dat" is:

```
Filename=W:\OCOG\PRECISION\data\May 2020\PRECISE_INTERVENTION6.dat,
RECFM=V,LRECL=319,File Size (bytes)=47686,
Last Modified=07May2020:11:51:49,
Create Time=07May2020:11:51:49
```

NOTE: 173 records were read from the infile "W:/OCOG/PRECISION/data/May  
2020/PRECISE\_INTERVENTION6.dat".

The minimum record length was 241.

The maximum record length was 319.

NOTE: There were 173 observations read from the data set CWD.INTERVENTION6.

NOTE: The data set WORK.INTERVENTION6 has 173 observations and 20  
variables.

NOTE: DATA statement used (Total process time):

```
real time          0.03 seconds
cpu time           0.01 seconds
```

```
3199
3200 DATA death;
3201     set cwd.DEATH;
3202 INFILE "&dir.PRECISE_DEATH.dat" LRECL=298 DSD DLM='^';
3203 MISSING A B C;
3204 INPUT
3205 VisitCRFID : 10.
3206 PID : 8.
3207 PINIT : $10.
3208 VDate : date9.
3209 VNum : 8.
3210 VType : $50.
3211 DocVer : 8.
3212 TrtCode : 8.
3213 TrtDesc : $250.
3214 StratumCode : 8.
3215 StratumDesc : $250.
3216 RegDate : date9.
3217 CentreCode : 8.
3218 CentreName : $250.
3219 DocReceivedDate : date9.
3220 DocEnteredDate : date9.
3221 DeathDate : date9.
3222 PrimaryCauseDeath : 8.
3223 OtherDeathCancer : $250.
3224 OtherDeathCause : $250.
3225 CRFComment : $250.
3226 ;
3227 FORMAT
3228 VDATE date9.
3229 REGDATE date9.
```

```
3230 DOCRECEIVEDDATE date9.
3231 DOCENTEREDDATE date9.
3232 DeathDate dates3m9.
3233 PrimaryCauseDeath T919X.
3234 ;
3235 LABEL
3236 VisitCRFID = 'VisitCRFID'
3237 PID = 'Patient ID'
3238 PINIT = 'Patient Initials'
3239 VDate = 'Visit Date'
3240 VNum = 'Visit Number'
3241 VType = 'Visit Type'
3242 Docver = 'Document Version'
3243 TrtCode = 'Treatment Code'
3244 TrtDesc = 'Treatment Description'
3245 StratumCode = 'Stratum Code'
3246 StratumDesc = 'Stratum Description'
3247 RegDate = 'Registration Date'
3248 CentreCode = 'Centre Code'
3249 CentreName = 'Centre Name'
3250 DocReceivedDate = 'Document Received Date'
3251 DocEnteredDate = 'Document Entered Date'
3252 DeathDate = 'DeathDate'
3253 PrimaryCauseDeath = 'PrimaryCauseDeath'
3254 OtherDeathCancer = 'OtherDeathCancer'
3255 OtherDeathCause = 'OtherDeathCause'
3256 CRFComment = 'CRFComment'
3257 ;
3258 RUN;
```

NOTE: The infile "W:/OCOG/PRECISION/data/May 2020/PRECISE\_DEATH.dat" is:  
Filename=W:\OCOG\PRECISION\data\May 2020\PRECISE\_DEATH.dat,  
RECFM=V,LRECL=298,File Size (bytes)=842,  
Last Modified=07May2020:11:51:49,  
Create Time=07May2020:11:51:49

NOTE: 3 records were read from the infile "W:/OCOG/PRECISION/data/May 2020/PRECISE\_DEATH.dat".

The minimum record length was 270.

The maximum record length was 298.

NOTE: There were 3 observations read from the data set CWD.DEATH.

NOTE: The data set WORK.DEATH has 3 observations and 21 variables.

NOTE: DATA statement used (Total process time):

real time 0.03 seconds

cpu time 0.00 seconds

```
3259
3260 DATA eos;
3261 set cwd.EOS;
3262 INFILE "&dir.PRECISE_EOS.dat" LRECL=450 DSD DLM='^';
3263 MISSING A B C;
3264 INPUT
3265 VisitCRFID : 10.
3266 PID : 8.
3267 PINIT : $10.
3268 VDate : date9.
3269 VNum : 8.
3270 VType : $50.
3271 DocVer : 8.
3272 TrtCode : 8.
```

```

3273 TrtDesc : $250.
3274 StratumCode : 8.
3275 StratumDesc : $250.
3276 RegDate : date9.
3277 CentreCode : 8.
3278 CentreName : $250.
3279 DocReceivedDate : date9.
3280 DocEnteredDate : date9.
3281 StudyTerminationDate : date9.
3282 TypeTermination : 8.
3283 EarlyTermination : 8.
3284 LostFUPSpecify : $250.
3285 OthEarlyTerminationSpecify : $250.
3286 AE : 8.
3287 CRFComment : $250.
3288 ;
3289 FORMAT
3290 VDATE date9.
3291 REGDATE date9.
3292 DOCRECEIVEDDATE date9.
3293 DOCENTEREDDATE date9.
3294 StudyTerminationDate dates3m9.
3295 TypeTermination T702X.
3296 EarlyTermination T932X.
3297 AE truefals7.
3298 ;
3299 LABEL
3300 VisitCRFID = 'VisitCRFID'
3301 PID = 'Patient ID'
3302 PINIT = 'Patient Initials'
3303 VDate = 'Visit Date'
3304 VNum = 'Visit Number'
3305 VType = 'Visit Type'
3306 Docver = 'Document Version'
3307 TrtCode = 'Treatment Code'
3308 TrtDesc = 'Treatment Description'
3309 StratumCode = 'Stratum Code'
3310 StratumDesc = 'Stratum Description'
3311 RegDate = 'Registration Date'
3312 CentreCode = 'Centre Code'
3313 CentreName = 'Centre Name'
3314 DocReceivedDate = 'Document Received Date'
3315 DocEnteredDate = 'Document Entered Date'
3316 StudyTerminationDate = 'StudyTerminationDate'
3317 TypeTermination = 'TypeTermination'
3318 EarlyTermination = 'EarlyTermination'
3319 LostFUPSpecify = 'LostFUPSpecify'
3320 OthEarlyTerminationSpecify = 'OthEarlyTerminationSpecify'
3321 AE = 'AE'
3322 CRFComment = 'CRFComment'
3323 ;
3324 RUN;

```

NOTE: The infile "W:/OCOG/PRECISION/data/May 2020/PRECISE\_EOS.dat" is:  
 Filename=W:\OCOG\PRECISION\data\May 2020\PRECISE\_EOS.dat,  
 RECFM=V,LRECL=450,File Size (bytes)=66172,  
 Last Modified=07May2020:11:51:49,  
 Create Time=07May2020:11:51:49

NOTE: 246 records were read from the infile "W:/OCOG/PRECISION/data/May 2020/PRECISE\_EOS.dat".

The minimum record length was 226.

The maximum record length was 450.

NOTE: There were 246 observations read from the data set CWD.EOS.

NOTE: The data set WORK.EOS has 246 observations and 23 variables.

NOTE: DATA statement used (Total process time):

real time           0.06 seconds

cpu time            0.06 seconds

3325

3326 DATA mridce;

3327     set cwd.MRIDCE;

3328 INFILE "&dir.PRECISE\_MRIDCE.dat" LRECL=679 DSD DLM='^';

3329 MISSING A B C;

3330 INPUT

3331 VisitCRFID : 10.

3332 PID : 8.

3333 PINIT : \$10.

3334 VDate : date9.

3335 VNum : 8.

3336 VType : \$50.

3337 DocVer : 8.

3338 TrtCode : 8.

3339 TrtDesc : \$250.

3340 StratumCode : 8.

3341 StratumDesc : \$250.

3342 RegDate : date9.

3343 CentreCode : 8.

3344 CentreName : \$250.

3345 DocReceivedDate : date9.

3346 DocEnteredDate : date9.

3347 SecondMRI : 8.

3348 ImgQuality : 8.

3349 ImgQuality\_2 : 8.

3350 ImgNotGoodComment : \$250.

3351 NumTumorSites : 12.2

3352 ChangeInLesions : 8.

3353 OldT1 : 8.

3354 OldT2 : 8.

3355 OldT3 : 8.

3356 Target1 : 8.

3357 T1ChangeFromP1 : 8.

3358 T1PiRadsScoreOverall : 12.2

3359 T1YourLikertScore : 12.2

3360 T1PiRadsScoreT2 : 12.2

3361 T1PiRadsScoreDWI : 12.2

3362 T1PiRadsScoreDCE : 12.2

3363 T1MeanADC : 12.2

3364 T1MinADC : 12.2

3365 T1Size1 : 12.2

3366 T1Size2 : 12.2

3367 T1Size3 : 12.2

3368 T1ExtraprostaticExtension : 8.

3369 Target2 : 8.

3370 T2ChangeFromP1 : 8.

3371 T2PiRadsScoreOverall : 12.2

3372 T2YourLikertScore : 12.2

3373 T2PiRadsScoreT2 : 12.2

3374 T2PiRadsScoreDWI : 12.2

3375 T2PiRadsScoreDCE : 12.2

3376 T2MeanADC : 12.2

3377 T2MinADC : 12.2  
3378 T1ProgScore : 8.  
3379 T2Size1 : 12.2  
3380 T2Size2 : 12.2  
3381 T2Size3 : 12.2  
3382 T2ExtraprostaticExtension : 8.  
3383 Target3 : 8.  
3384 T3ChangeFromP1 : 8.  
3385 T3PiRadsScoreOverall : 12.2  
3386 T3YourLikertScore : 12.2  
3387 T3PiRadsScoreT2 : 12.2  
3388 T3PiRadsScoreDWI : 12.2  
3389 T3PiRadsScoreDCE : 12.2  
3390 T3MeanADC : 12.2  
3391 T3MinADC : 12.2  
3392 T3Size1 : 12.2  
3393 T3Size2 : 12.2  
3394 T3Size3 : 12.2  
3395 T2ProgScore : 8.  
3396 T3ExtraprostaticExtension : 8.  
3397 MoreThan3TargetsSeen : 8.  
3398 MoreThan3TargetsDescribe : \$250.  
3399 LSVInvasion : 8.  
3400 RSVInvasion : 8.  
3401 Adenopathy : 8.  
3402 WorstPiRadsScore : 12.2  
3403 OthFindings : \$250.  
3404 T3ProgScore : 8.  
3405 Safety : 8.  
3406 SafetyDetails : \$250.  
3407 TRUSMRIfusedBiopsy : 8.  
3408 WorseningRiskProfile : 8.  
3409 WorseningRiskProfileDetails : \$250.  
3410 CRFComment : \$250.  
3411 ;  
3412 FORMAT  
3413 VDATE date9.  
3414 REGDATE date9.  
3415 DOCRECEIVEDDATE date9.  
3416 DOCENTEREDDATE date9.  
3417 SecondMRI truefals7.  
3418 ImgQuality T923X.  
3419 ImgQuality\_2 T962X.  
3420 NumTumorSites missing7.  
3421 ChangeInLesions truefals7.  
3422 OldT1 missing7.  
3423 OldT2 missing7.  
3424 OldT3 missing7.  
3425 Target1 truefals7.  
3426 T1ChangeFromP1 truefals7.  
3427 T1PiRadsScoreOverall missing7.  
3428 T1YourLikertScore missing7.  
3429 T1PiRadsScoreT2 missing7.  
3430 T1PiRadsScoreDWI missing7.  
3431 T1PiRadsScoreDCE missing7.  
3432 T1MeanADC missing7.  
3433 T1MinADC missing7.  
3434 T1Size1 missing7.  
3435 T1Size2 missing7.  
3436 T1Size3 missing7.  
3437 T1ExtraprostaticExtension T749X.

3438 Target2 truefals7.  
3439 T2ChangeFromP1 truefals7.  
3440 T2PiRadsScoreOverall missing7.  
3441 T2YourLikertScore missing7.  
3442 T2PiRadsScoreT2 missing7.  
3443 T2PiRadsScoreDWI missing7.  
3444 T2PiRadsScoreDCE missing7.  
3445 T2MeanADC missing7.  
3446 T2MinADC missing7.  
3447 T1ProgScore T1187X.  
3448 T2Size1 missing7.  
3449 T2Size2 missing7.  
3450 T2Size3 missing7.  
3451 T2ExtraprostaticExtension T749X.  
3452 Target3 truefals7.  
3453 T3ChangeFromP1 truefals7.  
3454 T3PiRadsScoreOverall missing7.  
3455 T3YourLikertScore missing7.  
3456 T3PiRadsScoreT2 missing7.  
3457 T3PiRadsScoreDWI missing7.  
3458 T3PiRadsScoreDCE missing7.  
3459 T3MeanADC missing7.  
3460 T3MinADC missing7.  
3461 T3Size1 missing7.  
3462 T3Size2 missing7.  
3463 T3Size3 missing7.  
3464 T2ProgScore T1187X.  
3465 T3ExtraprostaticExtension T749X.  
3466 MoreThan3TargetsSeen truefals7.  
3467 LSVInvasion T749X.  
3468 RSVInvasion T749X.  
3469 Adenopathy truefals7.  
3470 WorstPiRadsScore missing7.  
3471 T3ProgScore T1187X.  
3472 Safety truefals7.  
3473 TRUSMRIifusedBiopsy T963X.  
3474 WorseningRiskProfile truefals7.  
3475 ;  
3476 LABEL  
3477 VisitCRFID = 'VisitCRFID'  
3478 PID = 'Patient ID'  
3479 PINIT = 'Patient Initials'  
3480 VDate = 'Visit Date'  
3481 VNum = 'Visit Number'  
3482 VType = 'Visit Type'  
3483 Docver = 'Document Version'  
3484 TrtCode = 'Treatment Code'  
3485 TrtDesc = 'Treatment Description'  
3486 StratumCode = 'Stratum Code'  
3487 StratumDesc = 'Stratum Description'  
3488 RegDate = 'Registration Date'  
3489 CentreCode = 'Centre Code'  
3490 CentreName = 'Centre Name'  
3491 DocReceivedDate = 'Document Received Date'  
3492 DocEnteredDate = 'Document Entered Date'  
3493 SecondMRI = 'SecondMRI'  
3494 ImgQuality = 'ImgQuality'  
3495 ImgQuality\_2 = 'ImgQuality\_2'  
3496 ImgNotGoodComment = 'ImgNotGoodComment'  
3497 NumTumorSites = 'NumTumorSites'  
3498 ChangeInLesions = 'ChangeInLesions'

```
3499 OldT1 = 'OldT1'
3500 OldT2 = 'OldT2'
3501 OldT3 = 'OldT3'
3502 Target1 = 'Target1'
3503 T1ChangeFromP1 = 'T1ChangeFromP1'
3504 T1PiRadsScoreOverall = 'T1PiRadsScoreOverall'
3505 T1YourLikertScore = 'T1YourLikertScore'
3506 T1PiRadsScoreT2 = 'T1PiRadsScoreT2'
3507 T1PiRadsScoreDWI = 'T1PiRadsScoreDWI'
3508 T1PiRadsScoreDCE = 'T1PiRadsScoreDCE'
3509 T1MeanADC = 'T1MeanADC'
3510 T1MinADC = 'T1MinADC'
3511 T1Size1 = 'T1Size1'
3512 T1Size2 = 'T1Size2'
3513 T1Size3 = 'T1Size3'
3514 T1ExtraprostaticExtension = 'T1ExtraprostaticExtension'
3515 Target2 = 'Target2'
3516 T2ChangeFromP1 = 'T2ChangeFromP1'
3517 T2PiRadsScoreOverall = 'T2PiRadsScoreOverall'
3518 T2YourLikertScore = 'T2YourLikertScore'
3519 T2PiRadsScoreT2 = 'T2PiRadsScoreT2'
3520 T2PiRadsScoreDWI = 'T2PiRadsScoreDWI'
3521 T2PiRadsScoreDCE = 'T2PiRadsScoreDCE'
3522 T2MeanADC = 'T2MeanADC'
3523 T2MinADC = 'T2MinADC'
3524 T1ProgScore = 'T1ProgScore'
3525 T2Size1 = 'T2Size1'
3526 T2Size2 = 'T2Size2'
3527 T2Size3 = 'T2Size3'
3528 T2ExtraprostaticExtension = 'T2ExtraprostaticExtension'
3529 Target3 = 'Target3'
3530 T3ChangeFromP1 = 'T3ChangeFromP1'
3531 T3PiRadsScoreOverall = 'T3PiRadsScoreOverall'
3532 T3YourLikertScore = 'T3YourLikertScore'
3533 T3PiRadsScoreT2 = 'T3PiRadsScoreT2'
3534 T3PiRadsScoreDWI = 'T3PiRadsScoreDWI'
3535 T3PiRadsScoreDCE = 'T3PiRadsScoreDCE'
3536 T3MeanADC = 'T3MeanADC'
3537 T3MinADC = 'T3MinADC'
3538 T3Size1 = 'T3Size1'
3539 T3Size2 = 'T3Size2'
3540 T3Size3 = 'T3Size3'
3541 T2ProgScore = 'T2ProgScore'
3542 T3ExtraprostaticExtension = 'T3ExtraprostaticExtension'
3543 MoreThan3TargetsSeen = 'MoreThan3TargetsSeen'
3544 MoreThan3TargetsDescribe = 'MoreThan3TargetsDescribe'
3545 LSVInvasion = 'LSVINvasion'
3546 RSVInvasion = 'RSVINvasion'
3547 Adenopathy = 'Adenopathy'
3548 WorstPiRadsScore = 'WorstPiRadsScore'
3549 OthFindings = 'OthFindings'
3550 T3ProgScore = 'T3ProgScore'
3551 Safety = 'Safety'
3552 SafetyDetails = 'SafetyDetails'
3553 TRUSMRIfusedBiopsy = 'TRUSMRIfusedBiopsy'
3554 WorseningRiskProfile = 'WorseningRiskProfile'
3555 WorseningRiskProfileDetails = 'WorseningRiskProfileDetails'
3556 CRFComment = 'CRFComment'
3557 ;
3558 RUN;
```

NOTE: The infile "W:/OCOG/PRECISION/data/May 2020/PRECISE\_MRIDCE.dat" is:  
Filename=W:\OCOG\PRECISION\data\May 2020\PRECISE\_MRIDCE.dat,  
RECFM=V,LRECL=679,File Size (bytes)=111522,  
Last Modified=07May2020:11:51:49,  
Create Time=07May2020:11:51:49

NOTE: 273 records were read from the infile "W:/OCOG/PRECISION/data/May 2020/PRECISE\_MRIDCE.dat".

The minimum record length was 350.

The maximum record length was 679.

NOTE: There were 273 observations read from the data set CWD.MRIDCE.

NOTE: The data set WORK.MRIDCE has 273 observations and 80 variables.

NOTE: DATA statement used (Total process time):

real time 0.14 seconds

cpu time 0.04 seconds

```
3559
3560 DATA mridcel;
3561     set cwd.MRIDCE1;
3562 INFILE "&dir.PRECISE_MRIDCE1.dat" LRECL=296 DSD DLM='^';
3563 MISSING A B C;
3564 INPUT
3565 VisitCRFID : 10.
3566 PID : 8.
3567 PINIT : $10.
3568 VDate : date9.
3569 VNum : 8.
3570 VType : $50.
3571 DocVer : 8.
3572 TrtCode : 8.
3573 TrtDesc : $250.
3574 StratumCode : 8.
3575 StratumDesc : $250.
3576 RegDate : date9.
3577 CentreCode : 8.
3578 CentreName : $250.
3579 DocReceivedDate : date9.
3580 DocEnteredDate : date9.
3581 RowNum : $50.
3582 T1Location1 : 8.
3583 T1Location2 : 8.
3584 T1Location3 : 8.
3585 ;
3586 FORMAT
3587 VDATE date9.
3588 REGDATE date9.
3589 DOCRECEIVEDDATE date9.
3590 DOCENTEREDDATE date9.
3591 RowNum $50.
3592 T1Location1 T924X.
3593 T1Location2 T925X.
3594 T1Location3 T926X.
3595 ;
3596 LABEL
3597 VisitCRFID = 'VisitCRFID'
3598 PID = 'Patient ID'
3599 PINIT = 'Patient Initials'
3600 VDate = 'Visit Date'
3601 VNum = 'Visit Number'
3602 VType = 'Visit Type'
```



```
3603 Docver = 'Document Version'
3604 TrtCode = 'Treatment Code'
3605 TrtDesc = 'Treatment Description'
3606 StratumCode = 'Stratum Code'
3607 StratumDesc = 'Stratum Description'
3608 RegDate = 'Registration Date'
3609 CentreCode = 'Centre Code'
3610 CentreName = 'Centre Name'
3611 DocReceivedDate = 'Document Received Date'
3612 DocEnteredDate = 'Document Entered Date'
3613 RowNum = 'RowNum'
3614 T1Location1 = 'T1Location1'
3615 T1Location2 = 'T1Location2'
3616 T1Location3 = 'T1Location3'
3617 ;
3618 RUN;
```

NOTE: The infile "W:/OCOG/PRECISION/data/May 2020/PRECISE\_MRIDCE1.dat" is:  
Filename=W:\OCOG\PRECISION\data\May 2020\PRECISE\_MRIDCE1.dat,  
RECFM=V,LRECL=296,File Size (bytes)=80382,  
Last Modified=07May2020:11:51:49,  
Create Time=07May2020:11:51:49

NOTE: 285 records were read from the infile "W:/OCOG/PRECISION/data/May 2020/PRECISE\_MRIDCE1.dat".

The minimum record length was 227.

The maximum record length was 296.

NOTE: There were 285 observations read from the data set CWD.MRIDCE1.

NOTE: The data set WORK.MRIDCE1 has 285 observations and 20 variables.

NOTE: DATA statement used (Total process time):

real time 0.23 seconds

cpu time 0.06 seconds

```
3619
3620 DATA mridce2;
3621     set cwd.MRIDCE2;
3622 INFILE "&dir.PRECISE_MRIDCE2.dat" LRECL=296 DSD DLM='^';
3623 MISSING A B C;
3624 INPUT
3625 VisitCRFID : 10.
3626 PID : 8.
3627 PINIT : $10.
3628 VDate : date9.
3629 VNum : 8.
3630 VType : $50.
3631 DocVer : 8.
3632 TrtCode : 8.
3633 TrtDesc : $250.
3634 StratumCode : 8.
3635 StratumDesc : $250.
3636 RegDate : date9.
3637 CentreCode : 8.
3638 CentreName : $250.
3639 DocReceivedDate : date9.
3640 DocEnteredDate : date9.
3641 RowNum : $50.
3642 T2Location2 : 8.
3643 T2Location3 : 8.
3644 T2Location1 : 8.
3645 ;
```

```

3646 FORMAT
3647 VDATE date9.
3648 REGDATE date9.
3649 DOCRECEIVEDDATE date9.
3650 DOCENTEREDDATE date9.
3651 RowNum $50.
3652 T2Location2 T925X.
3653 T2Location3 T926X.
3654 T2Location1 T924X.
3655 ;
3656 LABEL
3657 VisitCRFID = 'VisitCRFID'
3658 PID = 'Patient ID'
3659 PINIT = 'Patient Initials'
3660 VDate = 'Visit Date'
3661 VNum = 'Visit Number'
3662 VType = 'Visit Type'
3663 Docver = 'Document Version'
3664 TrtCode = 'Treatment Code'
3665 TrtDesc = 'Treatment Description'
3666 StratumCode = 'Stratum Code'
3667 StratumDesc = 'Stratum Description'
3668 RegDate = 'Registration Date'
3669 CentreCode = 'Centre Code'
3670 CentreName = 'Centre Name'
3671 DocReceivedDate = 'Document Received Date'
3672 DocEnteredDate = 'Document Entered Date'
3673 RowNum = 'RowNum'
3674 T2Location2 = 'T2Location2'
3675 T2Location3 = 'T2Location3'
3676 T2Location1 = 'T2Location1'
3677 ;
3678 RUN;

```

NOTE: The infile "W:/OCOG/PRECISION/data/May 2020/PRECISE\_MRIDCE2.dat" is:  
 Filename=W:\OCOG\PRECISION\data\May 2020\PRECISE\_MRIDCE2.dat,  
 RECFM=V,LRECL=296,File Size (bytes)=78620,  
 Last Modified=07May2020:11:51:49,  
 Create Time=07May2020:11:51:49

NOTE: 279 records were read from the infile "W:/OCOG/PRECISION/data/May 2020/PRECISE\_MRIDCE2.dat".

The minimum record length was 227.

The maximum record length was 296.

NOTE: There were 279 observations read from the data set CWD.MRIDCE2.

NOTE: The data set WORK.MRIDCE2 has 279 observations and 20 variables.

NOTE: DATA statement used (Total process time):

real time 0.07 seconds

cpu time 0.04 seconds

```

3679
3680 DATA mridce3;
3681     set cwd.MRIDCE3;
3682 INFILE "&dir.PRECISE_MRIDCE3.dat" LRECL=296 DSD DLM='^';
3683 MISSING A B C;
3684 INPUT
3685 VisitCRFID : 10.
3686 PID : 8.
3687 PINIT : $10.
3688 VDate : date9.

```

```

3689 VNum : 8.
3690 VType : $50.
3691 DocVer : 8.
3692 TrtCode : 8.
3693 TrtDesc : $250.
3694 StratumCode : 8.
3695 StratumDesc : $250.
3696 RegDate : date9.
3697 CentreCode : 8.
3698 CentreName : $250.
3699 DocReceivedDate : date9.
3700 DocEnteredDate : date9.
3701 RowNum : $50.
3702 T3Location2 : 8.
3703 T3Location3 : 8.
3704 T3Location1 : 8.
3705 ;
3706 FORMAT
3707 VDATE date9.
3708 REGDATE date9.
3709 DOCRECEIVEDDATE date9.
3710 DOCENTEREDDATE date9.
3711 RowNum $50.
3712 T3Location2 T925X.
3713 T3Location3 T926X.
3714 T3Location1 T924X.
3715 ;
3716 LABEL
3717 VisitCRFID = 'VisitCRFID'
3718 PID = 'Patient ID'
3719 PINIT = 'Patient Initials'
3720 VDate = 'Visit Date'
3721 VNum = 'Visit Number'
3722 VType = 'Visit Type'
3723 Docver = 'Document Version'
3724 TrtCode = 'Treatment Code'
3725 TrtDesc = 'Treatment Description'
3726 StratumCode = 'Stratum Code'
3727 StratumDesc = 'Stratum Description'
3728 RegDate = 'Registration Date'
3729 CentreCode = 'Centre Code'
3730 CentreName = 'Centre Name'
3731 DocReceivedDate = 'Document Received Date'
3732 DocEnteredDate = 'Document Entered Date'
3733 RowNum = 'RowNum'
3734 T3Location2 = 'T3Location2'
3735 T3Location3 = 'T3Location3'
3736 T3Location1 = 'T3Location1'
3737 ;
3738 RUN;

```

NOTE: The infile "W:/OCOG/PRECISION/data/May 2020/PRECISE\_MRIDCE3.dat" is:  
 Filename=W:\OCOG\PRECISION\data\May 2020\PRECISE\_MRIDCE3.dat,  
 RECFM=V,LRECL=296,File Size (bytes)=76888,  
 Last Modified=07May2020:11:51:49,  
 Create Time=07May2020:11:51:49

NOTE: 273 records were read from the infile "W:/OCOG/PRECISION/data/May 2020/PRECISE\_MRIDCE3.dat".  
 The minimum record length was 227.  
 The maximum record length was 296.

NOTE: There were 273 observations read from the data set CWD.MRIDCE3.  
NOTE: The data set WORK.MRIDCE3 has 273 observations and 20 variables.  
NOTE: DATA statement used (Total process time):  
real time 0.09 seconds  
cpu time 0.06 seconds

```
3739
3740 DATA mrinodce;
3741     set cwd.MRINODCE;
3742     INFILE "&dir.PRECISE_MRINODCE.dat" LRECL=636 DSD DLM='^';
3743     MISSING A B C;
3744     INPUT
3745     VisitCRFID : 10.
3746     PID : 8.
3747     PINIT : $10.
3748     VDate : date9.
3749     VNum : 8.
3750     VType : $50.
3751     DocVer : 8.
3752     TrtCode : 8.
3753     TrtDesc : $250.
3754     StratumCode : 8.
3755     StratumDesc : $250.
3756     RegDate : date9.
3757     CentreCode : 8.
3758     CentreName : $250.
3759     DocReceivedDate : date9.
3760     DocEnteredDate : date9.
3761     MRIScanDate : date9.
3762     ReportDate : date9.
3763     Radiologist : $250.
3764     SecondMRI : 8.
3765     ImgQuality : 8.
3766     ImgQuality_2 : 8.
3767     ImgNotGoodComment : $250.
3768     NumTumorSites : 12.2
3769     Target1 : 8.
3770     T1PiRadsScoreOverall : 12.2
3771     T1YourLikertScore : 12.2
3772     T1PiRadsScoreT2 : 12.2
3773     T1PiRadsScoreDWI : 12.2
3774     T1MeanADC : 12.2
3775     T1MinADC : 12.2
3776     ChangeInTumorSite : 8.
3777     T1Size1 : 12.2
3778     T1Size2 : 12.2
3779     T1Size3 : 12.2
3780     T1ExtraprostaticExtension : 8.
3781     Target2 : 8.
3782     T2PiRadsScoreOverall : 12.2
3783     T2YourLikertScore : 12.2
3784     T2PiRadsScoreT2 : 12.2
3785     T2PiRadsScoreDWI : 12.2
3786     T2MeanADC : 12.2
3787     T2MinADC : 12.2
3788     T2Size1 : 12.2
3789     T2Size2 : 12.2
3790     T2Size3 : 12.2
3791     T2ExtraprostaticExtension : 8.
3792     T1ProgScore : 8.
```

3793 Target3 : 8.  
3794 T3PiRadsScoreOverall : 12.2  
3795 T3YourLikertScore : 12.2  
3796 T3PiRadsScoreT2 : 12.2  
3797 T3PiRadsScoreDWI : 12.2  
3798 T3MeanADC : 12.2  
3799 T3MinADC : 12.2  
3800 T3Size1 : 12.2  
3801 T3Size2 : 12.2  
3802 T3Size3 : 12.2  
3803 T3ExtraprostaticExtension : 8.  
3804 T2ProgScore : 8.  
3805 MoreThan3TargetsSeen : 8.  
3806 MoreThan3TargetsDescribe : \$250.  
3807 LSVInvasion : 8.  
3808 RSVInvasion : 8.  
3809 Adenopathy : 8.  
3810 WorstPiRadsScore : 12.2  
3811 OthFindings : \$250.  
3812 SI : 12.2  
3813 AP : 12.2  
3814 LR : 12.2  
3815 Volume : 12.2  
3816 CRFComment : \$250.  
3817 T3ProgScore : 8.  
3818 ;  
3819 FORMAT  
3820 VDATE date9.  
3821 REGDATE date9.  
3822 DOCRECEIVEDDATE date9.  
3823 DOCENTEREDDATE date9.  
3824 MRIScanDate dates3m9.  
3825 ReportDate dates3m9.  
3826 SecondMRI truefals7.  
3827 ImgQuality T923X.  
3828 ImgQuality\_2 T962X.  
3829 NumTumorSites missing7.  
3830 Target1 truefals7.  
3831 T1PiRadsScoreOverall missing7.  
3832 T1YourLikertScore missing7.  
3833 T1PiRadsScoreT2 missing7.  
3834 T1PiRadsScoreDWI missing7.  
3835 T1MeanADC missing7.  
3836 T1MinADC missing7.  
3837 ChangeInTumorSite truefals7.  
3838 T1Size1 missing7.  
3839 T1Size2 missing7.  
3840 T1Size3 missing7.  
3841 T1ExtraprostaticExtension T749X.  
3842 Target2 truefals7.  
3843 T2PiRadsScoreOverall missing7.  
3844 T2YourLikertScore missing7.  
3845 T2PiRadsScoreT2 missing7.  
3846 T2PiRadsScoreDWI missing7.  
3847 T2MeanADC missing7.  
3848 T2MinADC missing7.  
3849 T2Size1 missing7.  
3850 T2Size2 missing7.  
3851 T2Size3 missing7.  
3852 T2ExtraprostaticExtension T749X.  
3853 T1ProgScore T1187X.

```
3854 Target3 truefals7.
3855 T3PiRadsScoreOverall missing7.
3856 T3YourLikertScore missing7.
3857 T3PiRadsScoreT2 missing7.
3858 T3PiRadsScoreDWI missing7.
3859 T3MeanADC missing7.
3860 T3MinADC missing7.
3861 T3Size1 missing7.
3862 T3Size2 missing7.
3863 T3Size3 missing7.
3864 T3ExtraprostaticExtension T749X.
3865 T2ProgScore T1187X.
3866 MoreThan3TargetsSeen truefals7.
3867 LSVInvasion T749X.
3868 RSVInvasion T749X.
3869 Adenopathy truefals7.
3870 WorstPiRadsScore missing7.
3871 SI missing7.
3872 AP missing7.
3873 LR missing7.
3874 Volume missing7.
3875 T3ProgScore T1187X.
3876 ;
3877 LABEL
3878 VisitCRFID = 'VisitCRFID'
3879 PID = 'Patient ID'
3880 PINIT = 'Patient Initials'
3881 VDate = 'Visit Date'
3882 VNum = 'Visit Number'
3883 VType = 'Visit Type'
3884 Docver = 'Document Version'
3885 TrtCode = 'Treatment Code'
3886 TrtDesc = 'Treatment Description'
3887 StratumCode = 'Stratum Code'
3888 StratumDesc = 'Stratum Description'
3889 RegDate = 'Registration Date'
3890 CentreCode = 'Centre Code'
3891 CentreName = 'Centre Name'
3892 DocReceivedDate = 'Document Received Date'
3893 DocEnteredDate = 'Document Entered Date'
3894 MRIScanDate = 'MRIScanDate'
3895 ReportDate = 'ReportDate'
3896 Radiologist = 'Radiologist'
3897 SecondMRI = 'SecondMRI'
3898 ImgQuality = 'ImgQuality'
3899 ImgQuality_2 = 'ImgQuality_2'
3900 ImgNotGoodComment = 'ImgNotGoodComment'
3901 NumTumorSites = 'NumTumorSites'
3902 Target1 = 'Target1'
3903 T1PiRadsScoreOverall = 'T1PiRadsScoreOverall'
3904 T1YourLikertScore = 'T1YourLikertScore'
3905 T1PiRadsScoreT2 = 'T1PiRadsScoreT2'
3906 T1PiRadsScoreDWI = 'T1PiRadsScoreDWI'
3907 T1MeanADC = 'T1MeanADC'
3908 T1MinADC = 'T1MinADC'
3909 ChangeInTumorSite = 'ChangeInTumorSite'
3910 T1Size1 = 'T1Size1'
3911 T1Size2 = 'T1Size2'
3912 T1Size3 = 'T1Size3'
3913 T1ExtraprostaticExtension = 'T1ExtraprostaticExtension'
3914 Target2 = 'Target2'
```

```

3915 T2PiRadsScoreOverall = 'T2PiRadsScoreOverall'
3916 T2YourLikertScore = 'T2YourLikertScore'
3917 T2PiRadsScoreT2 = 'T2PiRadsScoreT2'
3918 T2PiRadsScoreDWI = 'T2PiRadsScoreDWI'
3919 T2MeanADC = 'T2MeanADC'
3920 T2MinADC = 'T2MinADC'
3921 T2Size1 = 'T2Size1'
3922 T2Size2 = 'T2Size2'
3923 T2Size3 = 'T2Size3'
3924 T2ExtraprostaticExtension = 'T2ExtraprostaticExtension'
3925 T1ProgScore = 'T1ProgScore'
3926 Target3 = 'Target3'
3927 T3PiRadsScoreOverall = 'T3PiRadsScoreOverall'
3928 T3YourLikertScore = 'T3YourLikertScore'
3929 T3PiRadsScoreT2 = 'T3PiRadsScoreT2'
3930 T3PiRadsScoreDWI = 'T3PiRadsScoreDWI'
3931 T3MeanADC = 'T3MeanADC'
3932 T3MinADC = 'T3MinADC'
3933 T3Size1 = 'T3Size1'
3934 T3Size2 = 'T3Size2'
3935 T3Size3 = 'T3Size3'
3936 T3ExtraprostaticExtension = 'T3ExtraprostaticExtension'
3937 T2ProgScore = 'T2ProgScore'
3938 MoreThan3TargetsSeen = 'MoreThan3TargetsSeen'
3939 MoreThan3TargetsDescribe = 'MoreThan3TargetsDescribe'
3940 LSVInvasion = 'LSVINvasion'
3941 RSVInvasion = 'RSVINvasion'
3942 Adenopathy = 'Adenopathy'
3943 WorstPiRadsScore = 'WorstPiRadsScore'
3944 OthFindings = 'OthFindings'
3945 SI = 'SI'
3946 AP = 'AP'
3947 LR = 'LR'
3948 Volume = 'Volume'
3949 CRFComment = 'CRFComment'
3950 T3ProgScore = 'T3ProgScore'
3951 ;
3952 RUN;

```

NOTE: The infile "W:/OCOG/PRECISION/data/May 2020/PRECISE\_MRINODCE.dat" is:  
 Filename=W:\OCOG\PRECISION\data\May 2020\PRECISE\_MRINODCE.dat,  
 RECFM=V,LRECL=636,File Size (bytes)=118002,  
 Last Modified=07May2020:11:51:49,  
 Create Time=07May2020:11:51:49

NOTE: 273 records were read from the infile "W:/OCOG/PRECISION/data/May 2020/PRECISE\_MRINODCE.dat".

The minimum record length was 343.

The maximum record length was 636.

NOTE: There were 273 observations read from the data set CWD.MRINODCE.

NOTE: The data set WORK.MRINODCE has 273 observations and 73 variables.

NOTE: DATA statement used (Total process time):

real time 0.35 seconds

cpu time 0.06 seconds

```

3953
3954 DATA mrinodce1;
3955     set cwd.MRINODCE1;
3956 INFILE "&dir.PRECISE_MRINODCE1.dat" LRECL=296 DSD DLM='^';
3957 MISSING A B C;

```

```

3958 INPUT
3959 VisitCRFID : 10.
3960 PID : 8.
3961 PINIT : $10.
3962 VDate : date9.
3963 VNum : 8.
3964 VType : $50.
3965 DocVer : 8.
3966 TrtCode : 8.
3967 TrtDesc : $250.
3968 StratumCode : 8.
3969 StratumDesc : $250.
3970 RegDate : date9.
3971 CentreCode : 8.
3972 CentreName : $250.
3973 DocReceivedDate : date9.
3974 DocEnteredDate : date9.
3975 RowNum : $50.
3976 T1Location1 : 8.
3977 T1Location2 : 8.
3978 T1Location3 : 8.
3979 ;
3980 FORMAT
3981 VDATE date9.
3982 REGDATE date9.
3983 DOCRECEIVEDDATE date9.
3984 DOCENTEREDDATE date9.
3985 RowNum $50.
3986 T1Location1 T924X.
3987 T1Location2 T925X.
3988 T1Location3 T926X.
3989 ;
3990 LABEL
3991 VisitCRFID = 'VisitCRFID'
3992 PID = 'Patient ID'
3993 PINIT = 'Patient Initials'
3994 VDate = 'Visit Date'
3995 VNum = 'Visit Number'
3996 VType = 'Visit Type'
3997 Docver = 'Document Version'
3998 TrtCode = 'Treatment Code'
3999 TrtDesc = 'Treatment Description'
4000 StratumCode = 'Stratum Code'
4001 StratumDesc = 'Stratum Description'
4002 RegDate = 'Registration Date'
4003 CentreCode = 'Centre Code'
4004 CentreName = 'Centre Name'
4005 DocReceivedDate = 'Document Received Date'
4006 DocEnteredDate = 'Document Entered Date'
4007 RowNum = 'RowNum'
4008 T1Location1 = 'T1Location1'
4009 T1Location2 = 'T1Location2'
4010 T1Location3 = 'T1Location3'
4011 ;
4012 RUN;

```

NOTE: The infile "W:/OCOG/PRECISION/data/May 2020/PRECISE\_MRINODCE1.dat" is:

```

Filename=W:\OCOG\PRECISION\data\May 2020\PRECISE_MRINODCE1.dat,
RECFM=V,LRECL=296,File Size (bytes)=123310,
Last Modified=07May2020:11:51:49,

```



Create Time=07May2020:11:51:49

NOTE: 439 records were read from the infile "W:/OCOG/PRECISION/data/May 2020/PRECISE\_MRINODCE1.dat".

The minimum record length was 227.

The maximum record length was 296.

NOTE: There were 439 observations read from the data set CWD.MRINODCE1.

NOTE: The data set WORK.MRINODCE1 has 439 observations and 20 variables.

NOTE: DATA statement used (Total process time):

real time 0.12 seconds

cpu time 0.09 seconds

```
4013
4014 DATA mrinodce2;
4015     set cwd.MRINODCE2;
4016 INFILE "&dir.PRECISE_MRINODCE2.dat" LRECL=296 DSD DLM='^';
4017 MISSING A B C;
4018 INPUT
4019 VisitCRFID : 10.
4020 PID : 8.
4021 PINIT : $10.
4022 VDate : date9.
4023 VNum : 8.
4024 VType : $50.
4025 DocVer : 8.
4026 TrtCode : 8.
4027 TrtDesc : $250.
4028 StratumCode : 8.
4029 StratumDesc : $250.
4030 RegDate : date9.
4031 CentreCode : 8.
4032 CentreName : $250.
4033 DocReceivedDate : date9.
4034 DocEnteredDate : date9.
4035 RowNum : $50.
4036 T2Location2 : 8.
4037 T2Location3 : 8.
4038 T2Location1 : 8.
4039 ;
4040 FORMAT
4041 VDATE date9.
4042 REGDATE date9.
4043 DOCRECEIVEDDATE date9.
4044 DOCENTEREDDATE date9.
4045 RowNum $50.
4046 T2Location2 T925X.
4047 T2Location3 T926X.
4048 T2Location1 T924X.
4049 ;
4050 LABEL
4051 VisitCRFID = 'VisitCRFID'
4052 PID = 'Patient ID'
4053 PINIT = 'Patient Initials'
4054 VDate = 'Visit Date'
4055 VNum = 'Visit Number'
4056 VType = 'Visit Type'
4057 Docver = 'Document Version'
4058 TrtCode = 'Treatment Code'
4059 TrtDesc = 'Treatment Description'
4060 StratumCode = 'Stratum Code'
```

```
4061 StratumDesc = 'Stratum Description'
4062 RegDate = 'Registration Date'
4063 CentreCode = 'Centre Code'
4064 CentreName = 'Centre Name'
4065 DocReceivedDate = 'Document Received Date'
4066 DocEnteredDate = 'Document Entered Date'
4067 RowNum = 'RowNum'
4068 T2Location2 = 'T2Location2'
4069 T2Location3 = 'T2Location3'
4070 T2Location1 = 'T2Location1'
4071 ;
4072 RUN;
```

NOTE: The infile "W:/OCOG/PRECISION/data/May 2020/PRECISE\_MRINODCE2.dat" is:

```
Filename=W:\OCOG\PRECISION\data\May 2020\PRECISE_MRINODCE2.dat,
RECFM=V,LRECL=296,File Size (bytes)=84311,
Last Modified=07May2020:11:51:49,
Create Time=07May2020:11:51:49
```

NOTE: 299 records were read from the infile "W:/OCOG/PRECISION/data/May 2020/PRECISE\_MRINODCE2.dat".

The minimum record length was 227.

The maximum record length was 296.

NOTE: There were 299 observations read from the data set CWD.MRINODCE2.

NOTE: The data set WORK.MRINODCE2 has 299 observations and 20 variables.

NOTE: DATA statement used (Total process time):

```
real time          0.06 seconds
cpu time           0.04 seconds
```

```
4073
4074 DATA mrinodce3;
4075     set cwd.MRINODCE3;
4076 INFILE "&dir.PRECISE_MRINODCE3.dat" LRECL=296 DSD DLM='^';
4077 MISSING A B C;
4078 INPUT
4079 VisitCRFID : 10.
4080 PID : 8.
4081 PINIT : $10.
4082 VDate : date9.
4083 VNum : 8.
4084 VType : $50.
4085 DocVer : 8.
4086 TrtCode : 8.
4087 TrtDesc : $250.
4088 StratumCode : 8.
4089 StratumDesc : $250.
4090 RegDate : date9.
4091 CentreCode : 8.
4092 CentreName : $250.
4093 DocReceivedDate : date9.
4094 DocEnteredDate : date9.
4095 RowNum : $50.
4096 T3Location3 : 8.
4097 T3Location2 : 8.
4098 T3Location1 : 8.
4099 ;
4100 FORMAT
4101 VDATE date9.
4102 REGDATE date9.
```

```

4103  DOCRECEIVEDDATE date9.
4104  DOCENTEREDDATE date9.
4105  RowNum    $50.
4106  T3Location3  T926X.
4107  T3Location2  T925X.
4108  T3Location1  T924X.
4109  ;
4110  LABEL
4111  VisitCRFID = 'VisitCRFID'
4112  PID = 'Patient ID'
4113  PINIT = 'Patient Initials'
4114  VDate = 'Visit Date'
4115  VNum = 'Visit Number'
4116  VType = 'Visit Type'
4117  Docver = 'Document Version'
4118  TrtCode = 'Treatment Code'
4119  TrtDesc = 'Treatment Description'
4120  StratumCode = 'Stratum Code'
4121  StratumDesc = 'Stratum Description'
4122  RegDate = 'Registration Date'
4123  CentreCode = 'Centre Code'
4124  CentreName = 'Centre Name'
4125  DocReceivedDate = 'Document Received Date'
4126  DocEnteredDate = 'Document Entered Date'
4127  RowNum = 'RowNum'
4128  T3Location3 = 'T3Location3'
4129  T3Location2 = 'T3Location2'
4130  T3Location1 = 'T3Location1'
4131  ;
4132  RUN;

```

NOTE: The infile "W:/OCOG/PRECISION/data/May 2020/PRECISE\_MRINODCE3.dat" is:

```

Filename=W:\OCOG\PRECISION\data\May 2020\PRECISE_MRINODCE3.dat,
RECFM=V,LRECL=296,File Size (bytes)=78538,
Last Modified=07May2020:11:51:49,
Create Time=07May2020:11:51:49

```

NOTE: 279 records were read from the infile "W:/OCOG/PRECISION/data/May 2020/PRECISE\_MRINODCE3.dat".

```

The minimum record length was 227.
The maximum record length was 296.

```

NOTE: There were 279 observations read from the data set CWD.MRINODCE3.  
NOTE: The data set WORK.MRINODCE3 has 279 observations and 20 variables.  
NOTE: DATA statement used (Total process time):

```

real time          0.04 seconds
cpu time           0.01 seconds

```

```

4133
4134  DATA ae;
4135    set cwd.AE;
4136  INFILE "&dir.PRECISE_AE.dat" LRECL=598 DSD DLM='^';
4137  MISSING A B C;
4138  INPUT
4139  VisitCRFID : 10.
4140  PID : 8.
4141  PINIT : $10.
4142  VDate : date9.
4143  VNum : 8.
4144  VType : $50.

```

4145 DocVer : 8.  
4146 TrtCode : 8.  
4147 TrtDesc : \$250.  
4148 StratumCode : 8.  
4149 StratumDesc : \$250.  
4150 RegDate : date9.  
4151 CentreCode : 8.  
4152 CentreName : \$250.  
4153 DocReceivedDate : date9.  
4154 DocEnteredDate : date9.  
4155 AENAME : \$250.  
4156 OtherAENAME : \$250.  
4157 SAE : 8.  
4158 SAEID : 12.2  
4159 AEID : 12.2  
4160 AEOnsetDate : date9.  
4161 AEResolutionDate : date9.  
4162 AEOngoing : 8.  
4163 AESeverity : 8.  
4164 AECorrectiveTherapies : 8.  
4165 AEOutcome : 8.  
4166 AERelation : 8.  
4167 CRFComment : \$250.  
4168 ;  
4169 FORMAT  
4170 VDATE date9.  
4171 REGDATE date9.  
4172 DOCRECEIVEDDATE date9.  
4173 DOCENTEREDDATE date9.  
4174 SAE truefals7.  
4175 SAEID missing7.  
4176 AEID missing7.  
4177 AEOnsetDate dates3m9.  
4178 AEResolutionDate dates3m9.  
4179 AEOngoing truefals7.  
4180 AESeverity T190X.  
4181 AECorrectiveTherapies T965X.  
4182 AEOutcome T24X.  
4183 AERelation T918X.  
4184 ;  
4185 LABEL  
4186 VisitCRFID = 'VisitCRFID'  
4187 PID = 'Patient ID'  
4188 PINIT = 'Patient Initials'  
4189 VDate = 'Visit Date'  
4190 VNum = 'Visit Number'  
4191 VType = 'Visit Type'  
4192 Docver = 'Document Version'  
4193 TrtCode = 'Treatment Code'  
4194 TrtDesc = 'Treatment Description'  
4195 StratumCode = 'Stratum Code'  
4196 StratumDesc = 'Stratum Description'  
4197 RegDate = 'Registration Date'  
4198 CentreCode = 'Centre Code'  
4199 CentreName = 'Centre Name'  
4200 DocReceivedDate = 'Document Received Date'  
4201 DocEnteredDate = 'Document Entered Date'  
4202 AENAME = 'AENAME'  
4203 OtherAENAME = 'OtherAENAME'  
4204 SAE = 'SAE'  
4205 SAEID = 'SAEID'

```
4206 AEID = 'AEID'
4207 AEOnsetDate = 'AESTART'
4208 AEResolutionDate = 'AESTOP'
4209 AEOngoing = 'AEOngoing'
4210 AESeverity = 'AEGRADE'
4211 AECorrectiveTherapies = 'AECorrectiveTherapies'
4212 AEOutcome = 'AEOutcome'
4213 AERelation = 'AERelation'
4214 CRFComment = 'CRFComment'
4215 ;
4216 RUN;
```

NOTE: The infile "W:/OCOG/PRECISION/data/May 2020/PRECISE\_AE.dat" is:  
Filename=W:\OCOG\PRECISION\data\May 2020\PRECISE\_AE.dat,  
RECFM=V,LRECL=598,File Size (bytes)=170520,  
Last Modified=07May2020:11:51:49,  
Create Time=07May2020:11:51:49

NOTE: 607 records were read from the infile "W:/OCOG/PRECISION/data/May 2020/PRECISE\_AE.dat".

The minimum record length was 237.

The maximum record length was 598.

NOTE: There were 607 observations read from the data set CWD.AE.

NOTE: The data set WORK.AE has 607 observations and 29 variables.

NOTE: DATA statement used (Total process time):

real time 0.14 seconds

cpu time 0.07 seconds

```
4217
4218 DATA mriunsched;
4219     set cwd.MRIUnsched;
4220 INFILE "&dir.PRECISE_MRIUnsched.dat" LRECL=831 DSD DLM='^';
4221 MISSING A B C;
4222 INPUT
4223 VisitCRFID : 10.
4224 PID : 8.
4225 PINIT : $10.
4226 VDate : date9.
4227 VNum : 8.
4228 VType : $50.
4229 DocVer : 8.
4230 TrtCode : 8.
4231 TrtDesc : $250.
4232 StratumCode : 8.
4233 StratumDesc : $250.
4234 RegDate : date9.
4235 CentreCode : 8.
4236 CentreName : $250.
4237 DocReceivedDate : date9.
4238 DocEnteredDate : date9.
4239 MRIDate : date9.
4240 ReportDate : date9.
4241 MRIReason : 8.
4242 MRIReasonSpecify : $250.
4243 Findings : $250.
4244 NumTargets : 8.
4245 Gt3TargetsSpec : 12.2
4246 Gt3TargetsDes : $250.
4247 PiRadsScore : 12.2
4248 Target1 : 8.
```

4249 T1PiRadsScore : 12.2  
4250 T1MeanADC : 12.2  
4251 T1Size1 : 12.2  
4252 T1Size2 : 12.2  
4253 T1Size3 : 12.2  
4254 T1ExtraprostaticExtension : 8.  
4255 Target2 : 8.  
4256 T2PiRadsScore : 12.2  
4257 T2MeanADC : 12.2  
4258 T2Size1 : 12.2  
4259 T2Size2 : 12.2  
4260 T2Size3 : 12.2  
4261 T2ExtraprostaticExtension : 8.  
4262 Target3 : 8.  
4263 T3PiRadsScore : 12.2  
4264 T3MeanADC : 12.2  
4265 T3Size1 : 12.2  
4266 T3Size2 : 12.2  
4267 T3Size3 : 12.2  
4268 T3ExtraprostaticExtension : 8.  
4269 OptComment : \$250.  
4270 ImpressionScore : \$250.  
4271 CRFComment : \$250.  
4272 ;  
4273 FORMAT  
4274 VDATE date9.  
4275 REGDATE date9.  
4276 DOCRECEIVEDDATE date9.  
4277 DOCENTEREDDATE date9.  
4278 MRIDate dates3m9.  
4279 ReportDate dates3m9.  
4280 MRIReason T1167X.  
4281 NumTargets T1168X.  
4282 Gt3TargetsSpec missing7.  
4283 PiRadsScore missing7.  
4284 Target1 truefals7.  
4285 T1PiRadsScore missing7.  
4286 T1MeanADC missing7.  
4287 T1Size1 missing7.  
4288 T1Size2 missing7.  
4289 T1Size3 missing7.  
4290 T1ExtraprostaticExtension T749X.  
4291 Target2 truefals7.  
4292 T2PiRadsScore missing7.  
4293 T2MeanADC missing7.  
4294 T2Size1 missing7.  
4295 T2Size2 missing7.  
4296 T2Size3 missing7.  
4297 T2ExtraprostaticExtension T749X.  
4298 Target3 truefals7.  
4299 T3PiRadsScore missing7.  
4300 T3MeanADC missing7.  
4301 T3Size1 missing7.  
4302 T3Size2 missing7.  
4303 T3Size3 missing7.  
4304 T3ExtraprostaticExtension T749X.  
4305 ;  
4306 LABEL  
4307 VisitCRFID = 'VisitCRFID'  
4308 PID = 'Patient ID'  
4309 PINIT = 'Patient Initials'

```
4310 VDate = 'Visit Date'
4311 VNum = 'Visit Number'
4312 VType = 'Visit Type'
4313 Docver = 'Document Version'
4314 TrtCode = 'Treatment Code'
4315 TrtDesc = 'Treatment Description'
4316 StratumCode = 'Stratum Code'
4317 StratumDesc = 'Stratum Description'
4318 RegDate = 'Registration Date'
4319 CentreCode = 'Centre Code'
4320 CentreName = 'Centre Name'
4321 DocReceivedDate = 'Document Received Date'
4322 DocEnteredDate = 'Document Entered Date'
4323 MRIDate = 'MRIDate'
4324 ReportDate = 'ReportDate'
4325 MRIReason = 'MRIReason'
4326 MRIReasonSpecify = 'MRIReasonSpecify'
4327 Findings = 'Findings'
4328 NumTargets = 'NumTargets'
4329 Gt3TargetsSpec = 'Gt3TargetsSpec'
4330 Gt3TargetsDes = 'Gt3TargetsDes'
4331 PiRadsScore = 'PiRadsScore'
4332 Target1 = 'Target1'
4333 T1PiRadsScore = 'T1PiRadsScore'
4334 T1MeanADC = 'T1MeanADC'
4335 T1Size1 = 'T1Size1'
4336 T1Size2 = 'T1Size2'
4337 T1Size3 = 'T1Size3'
4338 T1ExtraprostaticExtension = 'T1ExtraprostaticExtension'
4339 Target2 = 'Target2'
4340 T2PiRadsScore = 'T2PiRadsScore'
4341 T2MeanADC = 'T2MeanADC'
4342 T2Size1 = 'T2Size1'
4343 T2Size2 = 'T2Size2'
4344 T2Size3 = 'T2Size3'
4345 T2ExtraprostaticExtension = 'T2ExtraprostaticExtension'
4346 Target3 = 'Target3'
4347 T3PiRadsScore = 'T3PiRadsScore'
4348 T3MeanADC = 'T3MeanADC'
4349 T3Size1 = 'T3Size1'
4350 T3Size2 = 'T3Size2'
4351 T3Size3 = 'T3Size3'
4352 T3ExtraprostaticExtension = 'T3ExtraprostaticExtension'
4353 OptComment = 'OptComment'
4354 ImpressionScore = 'ImpressionScore'
4355 CRFComment = 'CRFComment'
4356 ;
4357 RUN;
```

NOTE: The infile "W:/OCOG/PRECISION/data/May 2020/PRECISE\_MRIUnsched.dat" is:

```
Filename=W:\OCOG\PRECISION\data\May 2020\PRECISE_MRIUnsched.dat,
RECFM=V,LRECL=831,File Size (bytes)=7496,
Last Modified=07May2020:11:51:49,
Create Time=07May2020:11:51:49
```

NOTE: 16 records were read from the infile "W:/OCOG/PRECISION/data/May 2020/PRECISE\_MRIUnsched.dat".

The minimum record length was 334.

The maximum record length was 831.

NOTE: There were 16 observations read from the data set CWD.MRIUNSCHED.

NOTE: The data set WORK.MRIUNSCHEd has 16 observations and 49 variables.

NOTE: DATA statement used (Total process time):

real time           0.07 seconds  
cpu time            0.03 seconds

```
4358
4359 DATA mriunsched1;
4360     set cwd.MRIUnsched1;
4361     INFILE "&dir.PRECISE_MRIUnsched1.dat" LRECL=276 DSD DLM='^';
4362     MISSING A B C;
4363     INPUT
4364     VisitCRFID : 10.
4365     PID : 8.
4366     PINIT : $10.
4367     VDate : date9.
4368     VNum : 8.
4369     VType : $50.
4370     DocVer : 8.
4371     TrtCode : 8.
4372     TrtDesc : $250.
4373     StratumCode : 8.
4374     StratumDesc : $250.
4375     RegDate : date9.
4376     CentreCode : 8.
4377     CentreName : $250.
4378     DocReceivedDate : date9.
4379     DocEnteredDate : date9.
4380     RowNum : $50.
4381     T1Location1 : 8.
4382     T1Location2 : 8.
4383     T1Location3 : 8.
4384     ;
4385     FORMAT
4386     VDATE date9.
4387     REGDATE date9.
4388     DOCRECEIVEDDATE date9.
4389     DOCENTEREDDATE date9.
4390     RowNum $50.
4391     T1Location1 T924X.
4392     T1Location2 T925X.
4393     T1Location3 T926X.
4394     ;
4395     LABEL
4396     VisitCRFID = 'VisitCRFID'
4397     PID = 'Patient ID'
4398     PINIT = 'Patient Initials'
4399     VDate = 'Visit Date'
4400     VNum = 'Visit Number'
4401     VType = 'Visit Type'
4402     Docver = 'Document Version'
4403     TrtCode = 'Treatment Code'
4404     TrtDesc = 'Treatment Description'
4405     StratumCode = 'Stratum Code'
4406     StratumDesc = 'Stratum Description'
4407     RegDate = 'Registration Date'
4408     CentreCode = 'Centre Code'
4409     CentreName = 'Centre Name'
4410     DocReceivedDate = 'Document Received Date'
4411     DocEnteredDate = 'Document Entered Date'
4412     RowNum = 'RowNum'
```



```
4413 T1Location1 = 'T1Location1'
4414 T1Location2 = 'T1Location2'
4415 T1Location3 = 'T1Location3'
4416 ;
4417 RUN;
```

NOTE: The infile "W:/OCOG/PRECISION/data/May 2020/PRECISE\_MRIUnsched1.dat" is:

```
Filename=W:\OCOG\PRECISION\data\May 2020\PRECISE_MRIUnsched1.dat,
RECFM=V,LRECL=276,File Size (bytes)=4341,
Last Modified=07May2020:11:51:49,
Create Time=07May2020:11:51:49
```

NOTE: 16 records were read from the infile "W:/OCOG/PRECISION/data/May 2020/PRECISE\_MRIUnsched1.dat".

The minimum record length was 260.

The maximum record length was 276.

NOTE: There were 16 observations read from the data set CWD.MRIUNSCHED1.

NOTE: The data set WORK.MRIUNSCHED1 has 16 observations and 20 variables.

NOTE: DATA statement used (Total process time):

```
real time          0.06 seconds
cpu time           0.01 seconds
```

```
4418
4419 DATA mriunsched2;
4420     set cwd.MRIUnsched2;
4421 INFILE "&dir.PRECISE_MRIUnsched2.dat" LRECL=276 DSD DLM='^';
4422 MISSING A B C;
4423 INPUT
4424 VisitCRFID : 10.
4425 PID : 8.
4426 PINIT : $10.
4427 VDate : date9.
4428 VNum : 8.
4429 VType : $50.
4430 DocVer : 8.
4431 TrtCode : 8.
4432 TrtDesc : $250.
4433 StratumCode : 8.
4434 StratumDesc : $250.
4435 RegDate : date9.
4436 CentreCode : 8.
4437 CentreName : $250.
4438 DocReceivedDate : date9.
4439 DocEnteredDate : date9.
4440 RowNum : $50.
4441 T2Location3 : 8.
4442 T2Location2 : 8.
4443 T2Location1 : 8.
4444 ;
4445 FORMAT
4446 VDATE date9.
4447 REGDATE date9.
4448 DOCRECEIVEDDATE date9.
4449 DOCENTEREDDATE date9.
4450 RowNum $50.
4451 T2Location3 T926X.
4452 T2Location2 T925X.
4453 T2Location1 T924X.
4454 ;
```

```
4455 LABEL
4456 VisitCRFID = 'VisitCRFID'
4457 PID = 'Patient ID'
4458 PINIT = 'Patient Initials'
4459 VDate = 'Visit Date'
4460 VNum = 'Visit Number'
4461 VType = 'Visit Type'
4462 Docver = 'Document Version'
4463 TrtCode = 'Treatment Code'
4464 TrtDesc = 'Treatment Description'
4465 StratumCode = 'Stratum Code'
4466 StratumDesc = 'Stratum Description'
4467 RegDate = 'Registration Date'
4468 CentreCode = 'Centre Code'
4469 CentreName = 'Centre Name'
4470 DocReceivedDate = 'Document Received Date'
4471 DocEnteredDate = 'Document Entered Date'
4472 RowNum = 'RowNum'
4473 T2Location3 = 'T2Location3'
4474 T2Location2 = 'T2Location2'
4475 T2Location1 = 'T2Location1'
4476 ;
4477 RUN;
```

NOTE: The infile "W:/OCOG/PRECISION/data/May 2020/PRECISE\_MRIUnsched2.dat" is:

```
Filename=W:\OCOG\PRECISION\data\May 2020\PRECISE_MRIUnsched2.dat,
RECFM=V,LRECL=276,File Size (bytes)=4341,
Last Modified=07May2020:11:51:49,
Create Time=07May2020:11:51:49
```

NOTE: 16 records were read from the infile "W:/OCOG/PRECISION/data/May 2020/PRECISE\_MRIUnsched2.dat".

```
The minimum record length was 260.
The maximum record length was 276.
```

NOTE: There were 16 observations read from the data set CWD.MRIUNSCHED2.  
NOTE: The data set WORK.MRIUNSCHED2 has 16 observations and 20 variables.  
NOTE: DATA statement used (Total process time):

|           |              |
|-----------|--------------|
| real time | 0.07 seconds |
| cpu time  | 0.04 seconds |

```
4478
4479 DATA mriunsched3;
4480     set cwd.MRIUnsched3;
4481 INFILE "&dir.PRECISE_MRIUnsched3.dat" LRECL=276 DSD DLM='^';
4482 MISSING A B C;
4483 INPUT
4484 VisitCRFID : 10.
4485 PID : 8.
4486 PINIT : $10.
4487 VDate : date9.
4488 VNum : 8.
4489 VType : $50.
4490 DocVer : 8.
4491 TrtCode : 8.
4492 TrtDesc : $250.
4493 StratumCode : 8.
4494 StratumDesc : $250.
4495 RegDate : date9.
4496 CentreCode : 8.
```

```

4497 CentreName : $250.
4498 DocReceivedDate : date9.
4499 DocEnteredDate : date9.
4500 RowNum : $50.
4501 T3Location2 : 8.
4502 T3Location1 : 8.
4503 T3Location3 : 8.
4504 ;
4505 FORMAT
4506 VDATE date9.
4507 REGDATE date9.
4508 DOCRECEIVEDDATE date9.
4509 DOCENTEREDDATE date9.
4510 RowNum $50.
4511 T3Location2 T925X.
4512 T3Location1 T924X.
4513 T3Location3 T926X.
4514 ;
4515 LABEL
4516 VisitCRFID = 'VisitCRFID'
4517 PID = 'Patient ID'
4518 PINIT = 'Patient Initials'
4519 VDate = 'Visit Date'
4520 VNum = 'Visit Number'
4521 VType = 'Visit Type'
4522 Docver = 'Document Version'
4523 TrtCode = 'Treatment Code'
4524 TrtDesc = 'Treatment Description'
4525 StratumCode = 'Stratum Code'
4526 StratumDesc = 'Stratum Description'
4527 RegDate = 'Registration Date'
4528 CentreCode = 'Centre Code'
4529 CentreName = 'Centre Name'
4530 DocReceivedDate = 'Document Received Date'
4531 DocEnteredDate = 'Document Entered Date'
4532 RowNum = 'RowNum'
4533 T3Location2 = 'T3Location2'
4534 T3Location1 = 'T3Location1'
4535 T3Location3 = 'T3Location3'
4536 ;
4537 RUN;

```

NOTE: The infile "W:/OCOG/PRECISION/data/May 2020/PRECISE\_MRIUnsched3.dat" is:

```

Filename=W:\OCOG\PRECISION\data\May 2020\PRECISE_MRIUnsched3.dat,
RECFM=V,LRECL=276,File Size (bytes)=4341,
Last Modified=07May2020:11:51:49,
Create Time=07May2020:11:51:49

```

NOTE: 16 records were read from the infile "W:/OCOG/PRECISION/data/May 2020/PRECISE\_MRIUnsched3.dat".

```

The minimum record length was 260.
The maximum record length was 276.

```

NOTE: There were 16 observations read from the data set CWD.MRIUNSCHED3.  
NOTE: The data set WORK.MRIUNSCHED3 has 16 observations and 20 variables.  
NOTE: DATA statement used (Total process time):

```

real time          0.04 seconds
cpu time           0.04 seconds

```

4538

```
4539 DATA usunsched;
4540     set cwd.USUnsched;
4541     INFILE "&dir.PRECISE_USUnsched.dat" LRECL=721 DSD DLM='^';
4542     MISSING A B C;
4543     INPUT
4544     VisitCRFID : 10.
4545     PID : 8.
4546     PINIT : $10.
4547     VDate : date9.
4548     VNum : 8.
4549     VType : $50.
4550     DocVer : 8.
4551     TrtCode : 8.
4552     TrtDesc : $250.
4553     StratumCode : 8.
4554     StratumDesc : $250.
4555     RegDate : date9.
4556     CentreCode : 8.
4557     CentreName : $250.
4558     DocReceivedDate : date9.
4559     DocEnteredDate : date9.
4560     USDate : date9.
4561     ReportDate : date9.
4562     USReason : 8.
4563     USReasonSpecify : $250.
4564     Findings : $250.
4565     NumTargets : 8.
4566     Gt3TargetsSpec : 12.2
4567     Gt3TargetsDes : $250.
4568     PRIMUSScore : 12.2
4569     Target1 : 8.
4570     T1PRIMUSScore : 12.2
4571     T1Size1 : 12.2
4572     T1Size2 : 12.2
4573     T1Size3 : 12.2
4574     T1ExtraprostaticExtension : 8.
4575     Target2 : 8.
4576     T2PRIMUSScore : 12.2
4577     T2Size1 : 12.2
4578     T2Size2 : 12.2
4579     T2Size3 : 12.2
4580     T2ExtraprostaticExtension : 8.
4581     Target3 : 8.
4582     T3PRIMUSScore : 12.2
4583     T3Size1 : 12.2
4584     T3Size2 : 12.2
4585     T3Size3 : 12.2
4586     T3ExtraprostaticExtension : 8.
4587     OptComment : $250.
4588     ImpressionScore : $250.
4589     CRFComment : $250.
4590     ;
4591     FORMAT
4592     VDATE date9.
4593     REGDATE date9.
4594     DOCRECEIVEDDATE date9.
4595     DOCENTEREDDATE date9.
4596     USDate dates3m9.
4597     ReportDate dates3m9.
4598     USReason T1167X.
4599     NumTargets T1168X.
```

```
4600 Gt3TargetsSpec missing7.
4601 PRIMUSScore missing7.
4602 Target1 truefals7.
4603 T1PRIMUSScore missing7.
4604 T1Size1 missing7.
4605 T1Size2 missing7.
4606 T1Size3 missing7.
4607 T1ExtraprostaticExtension T749X.
4608 Target2 truefals7.
4609 T2PRIMUSScore missing7.
4610 T2Size1 missing7.
4611 T2Size2 missing7.
4612 T2Size3 missing7.
4613 T2ExtraprostaticExtension T749X.
4614 Target3 truefals7.
4615 T3PRIMUSScore missing7.
4616 T3Size1 missing7.
4617 T3Size2 missing7.
4618 T3Size3 missing7.
4619 T3ExtraprostaticExtension T749X.
4620 ;
4621 LABEL
4622 VisitCRFID = 'VisitCRFID'
4623 PID = 'Patient ID'
4624 PINIT = 'Patient Initials'
4625 VDate = 'Visit Date'
4626 VNum = 'Visit Number'
4627 VType = 'Visit Type'
4628 Docver = 'Document Version'
4629 TrtCode = 'Treatment Code'
4630 TrtDesc = 'Treatment Description'
4631 StratumCode = 'Stratum Code'
4632 StratumDesc = 'Stratum Description'
4633 RegDate = 'Registration Date'
4634 CentreCode = 'Centre Code'
4635 CentreName = 'Centre Name'
4636 DocReceivedDate = 'Document Received Date'
4637 DocEnteredDate = 'Document Entered Date'
4638 USDate = 'USDate'
4639 ReportDate = 'ReportDate'
4640 USReason = 'USReason'
4641 USReasonSpecify = 'USReasonSpecify'
4642 Findings = 'Findings'
4643 NumTargets = 'NumTargets'
4644 Gt3TargetsSpec = 'Gt3TargetsSpec'
4645 Gt3TargetsDes = 'Gt3TargetsDes'
4646 PRIMUSScore = 'PRIMUSScore'
4647 Target1 = 'Target1'
4648 T1PRIMUSScore = 'T1PRIMUSScore'
4649 T1Size1 = 'T1Size1'
4650 T1Size2 = 'T1Size2'
4651 T1Size3 = 'T1Size3'
4652 T1ExtraprostaticExtension = 'T1ExtraprostaticExtension'
4653 Target2 = 'Target2'
4654 T2PRIMUSScore = 'T2PRIMUSScore'
4655 T2Size1 = 'T2Size1'
4656 T2Size2 = 'T2Size2'
4657 T2Size3 = 'T2Size3'
4658 T2ExtraprostaticExtension = 'T2ExtraprostaticExtension'
4659 Target3 = 'Target3'
4660 T3PRIMUSScore = 'T3PRIMUSScore'
```

```
4661 T3Size1 = 'T3Size1'
4662 T3Size2 = 'T3Size2'
4663 T3Size3 = 'T3Size3'
4664 T3ExtraprostaticExtension = 'T3ExtraprostaticExtension'
4665 OptComment = 'OptComment'
4666 ImpressionScore = 'ImpressionScore'
4667 CRFComment = 'CRFComment'
4668 ;
4669 RUN;
```

NOTE: The infile "W:/OCOG/PRECISION/data/May 2020/PRECISE\_USUnsched.dat" is:

```
Filename=W:\OCOG\PRECISION\data\May 2020\PRECISE_USUnsched.dat,
RECFM=V,LRECL=721,File Size (bytes)=3532,
Last Modified=07May2020:11:51:49,
Create Time=07May2020:11:51:49
```

NOTE: 7 records were read from the infile "W:/OCOG/PRECISION/data/May 2020/PRECISE\_USUnsched.dat".

The minimum record length was 360.

The maximum record length was 721.

NOTE: There were 7 observations read from the data set CWD.USUNSCHED.

NOTE: The data set WORK.USUNSCHED has 7 observations and 46 variables.

NOTE: DATA statement used (Total process time):

```
real time          0.04 seconds
cpu time           0.01 seconds
```

```
4670
4671 DATA usunsched1;
4672     set cwd.USUnsched1;
4673 INFILE "&dir.PRECISE_USUnsched1.dat" LRECL=295 DSD DLM='^';
4674 MISSING A B C;
4675 INPUT
4676 VisitCRFID : 10.
4677 PID : 8.
4678 PINIT : $10.
4679 VDate : date9.
4680 VNum : 8.
4681 VType : $50.
4682 DocVer : 8.
4683 TrtCode : 8.
4684 TrtDesc : $250.
4685 StratumCode : 8.
4686 StratumDesc : $250.
4687 RegDate : date9.
4688 CentreCode : 8.
4689 CentreName : $250.
4690 DocReceivedDate : date9.
4691 DocEnteredDate : date9.
4692 RowNum : $50.
4693 T1Location1 : 8.
4694 T1Location3 : 8.
4695 T1Location2 : 8.
4696 ;
4697 FORMAT
4698 VDATE date9.
4699 REGDATE date9.
4700 DOCRECEIVEDDATE date9.
4701 DOCENTEREDDATE date9.
4702 RowNum $50.
```

```
4703 T1Location1 T924X.
4704 T1Location3 T926X.
4705 T1Location2 T925X.
4706 ;
4707 LABEL
4708 VisitCRFID = 'VisitCRFID'
4709 PID = 'Patient ID'
4710 PINIT = 'Patient Initials'
4711 VDate = 'Visit Date'
4712 VNum = 'Visit Number'
4713 VType = 'Visit Type'
4714 Docver = 'Document Version'
4715 TrtCode = 'Treatment Code'
4716 TrtDesc = 'Treatment Description'
4717 StratumCode = 'Stratum Code'
4718 StratumDesc = 'Stratum Description'
4719 RegDate = 'Registration Date'
4720 CentreCode = 'Centre Code'
4721 CentreName = 'Centre Name'
4722 DocReceivedDate = 'Document Received Date'
4723 DocEnteredDate = 'Document Entered Date'
4724 RowNum = 'RowNum'
4725 T1Location1 = 'T1Location1'
4726 T1Location3 = 'T1Location3'
4727 T1Location2 = 'T1Location2'
4728 ;
4729 RUN;
```

NOTE: The infile "W:/OCOG/PRECISION/data/May 2020/PRECISE\_USUnsched1.dat" is:

```
Filename=W:\OCOG\PRECISION\data\May 2020\PRECISE_USUnsched1.dat,
RECFM=V,LRECL=295,File Size (bytes)=1984,
Last Modified=07May2020:11:51:49,
Create Time=07May2020:11:51:49
```

NOTE: 7 records were read from the infile "W:/OCOG/PRECISION/data/May 2020/PRECISE\_USUnsched1.dat".

The minimum record length was 271.

The maximum record length was 295.

NOTE: There were 7 observations read from the data set CWD.USUNSCHED1.

NOTE: The data set WORK.USUNSCHED1 has 7 observations and 20 variables.

NOTE: DATA statement used (Total process time):

```
real time          0.04 seconds
cpu time           0.01 seconds
```

```
4730
4731 DATA usunsched2;
4732     set cwd.USUnsched2;
4733 INFILE "&dir.PRECISE_USUnsched2.dat" LRECL=295 DSD DLM='^';
4734 MISSING A B C;
4735 INPUT
4736 VisitCRFID : 10.
4737 PID : 8.
4738 PINIT : $10.
4739 VDate : date9.
4740 VNum : 8.
4741 VType : $50.
4742 DocVer : 8.
4743 TrtCode : 8.
4744 TrtDesc : $250.
```

```

4745 StratumCode : 8.
4746 StratumDesc : $250.
4747 RegDate : date9.
4748 CentreCode : 8.
4749 CentreName : $250.
4750 DocReceivedDate : date9.
4751 DocEnteredDate : date9.
4752 RowNum : $50.
4753 T2Location1 : 8.
4754 T2Location3 : 8.
4755 T2Location2 : 8.
4756 ;
4757 FORMAT
4758 VDATE date9.
4759 REGDATE date9.
4760 DOCRECEIVEDDATE date9.
4761 DOCENTEREDDATE date9.
4762 RowNum $50.
4763 T2Location1 T924X.
4764 T2Location3 T926X.
4765 T2Location2 T925X.
4766 ;
4767 LABEL
4768 VisitCRFID = 'VisitCRFID'
4769 PID = 'Patient ID'
4770 PINIT = 'Patient Initials'
4771 VDate = 'Visit Date'
4772 VNum = 'Visit Number'
4773 VType = 'Visit Type'
4774 Docver = 'Document Version'
4775 TrtCode = 'Treatment Code'
4776 TrtDesc = 'Treatment Description'
4777 StratumCode = 'Stratum Code'
4778 StratumDesc = 'Stratum Description'
4779 RegDate = 'Registration Date'
4780 CentreCode = 'Centre Code'
4781 CentreName = 'Centre Name'
4782 DocReceivedDate = 'Document Received Date'
4783 DocEnteredDate = 'Document Entered Date'
4784 RowNum = 'RowNum'
4785 T2Location1 = 'T2Location1'
4786 T2Location3 = 'T2Location3'
4787 T2Location2 = 'T2Location2'
4788 ;
4789 RUN;

```

NOTE: The infile "W:/OCOG/PRECISION/data/May 2020/PRECISE\_USUnsched2.dat" is:

```

Filename=W:\OCOG\PRECISION\data\May 2020\PRECISE_USUnsched2.dat,
RECFM=V,LRECL=295,File Size (bytes)=1984,
Last Modified=07May2020:11:51:49,
Create Time=07May2020:11:51:49

```

NOTE: 7 records were read from the infile "W:/OCOG/PRECISION/data/May 2020/PRECISE\_USUnsched2.dat".

```

The minimum record length was 271.
The maximum record length was 295.

```

NOTE: There were 7 observations read from the data set CWD.USUNSCHED2.

NOTE: The data set WORK.USUNSCHED2 has 7 observations and 20 variables.

NOTE: DATA statement used (Total process time):

```

real time          0.04 seconds

```



cpu time 0.04 seconds

```
4790
4791 DATA usunsched3;
4792     set cwd.USUnsched3;
4793 INFILE "&dir.PRECISE_USUnsched3.dat" LRECL=295 DSD DLM='^';
4794 MISSING A B C;
4795 INPUT
4796 VisitCRFID : 10.
4797 PID : 8.
4798 PINIT : $10.
4799 VDate : date9.
4800 VNum : 8.
4801 VType : $50.
4802 DocVer : 8.
4803 TrtCode : 8.
4804 TrtDesc : $250.
4805 StratumCode : 8.
4806 StratumDesc : $250.
4807 RegDate : date9.
4808 CentreCode : 8.
4809 CentreName : $250.
4810 DocReceivedDate : date9.
4811 DocEnteredDate : date9.
4812 RowNum : $50.
4813 T3Location1 : 8.
4814 T3Location2 : 8.
4815 T3Location3 : 8.
4816 ;
4817 FORMAT
4818 VDATE date9.
4819 REGDATE date9.
4820 DOCRECEIVEDDATE date9.
4821 DOCENTEREDDATE date9.
4822 RowNum $50.
4823 T3Location1 T924X.
4824 T3Location2 T925X.
4825 T3Location3 T926X.
4826 ;
4827 LABEL
4828 VisitCRFID = 'VisitCRFID'
4829 PID = 'Patient ID'
4830 PINIT = 'Patient Initials'
4831 VDate = 'Visit Date'
4832 VNum = 'Visit Number'
4833 VType = 'Visit Type'
4834 Docver = 'Document Version'
4835 TrtCode = 'Treatment Code'
4836 TrtDesc = 'Treatment Description'
4837 StratumCode = 'Stratum Code'
4838 StratumDesc = 'Stratum Description'
4839 RegDate = 'Registration Date'
4840 CentreCode = 'Centre Code'
4841 CentreName = 'Centre Name'
4842 DocReceivedDate = 'Document Received Date'
4843 DocEnteredDate = 'Document Entered Date'
4844 RowNum = 'RowNum'
4845 T3Location1 = 'T3Location1'
4846 T3Location2 = 'T3Location2'
4847 T3Location3 = 'T3Location3'
```

```
4848 ;
4849 RUN;
```

NOTE: The infile "W:/OCOG/PRECISION/data/May 2020/PRECISE\_USUnsched3.dat" is:

```
Filename=W:\OCOG\PRECISION\data\May 2020\PRECISE_USUnsched3.dat,
RECFM=V,LRECL=295,File Size (bytes)=1984,
Last Modified=07May2020:11:51:49,
Create Time=07May2020:11:51:49
```

NOTE: 7 records were read from the infile "W:/OCOG/PRECISION/data/May 2020/PRECISE\_USUnsched3.dat".

The minimum record length was 271.

The maximum record length was 295.

NOTE: There were 7 observations read from the data set CWD.USUNSCHED3.

NOTE: The data set WORK.USUNSCHED3 has 7 observations and 20 variables.

NOTE: DATA statement used (Total process time):

real time 0.03 seconds

cpu time 0.00 seconds

```
4850
4851 DATA iris_questions;
4852     set cwd.IRIS_QUESTIONS;
4853     INFILE "&dir.IRIS_QUESTIONS.dat" LRECL=295 DSD DLM='^';
4854     MISSING A B C;
4855     INPUT
4856     PID : 8.
4857     PINIT : $10.
4858     CentreCode : 8.
4859     CentreName : $250.
4860     PATID : 8.
4861     BiopsyTissue : 8.
4862     BloodSampleCollection : 8.
4863     Consent : 8.
4864     ConsentDate : date9.
4865     ELIGConfirm : date9.
4866     HighGradeCancerRisk : 8.
4867     ICFDate : date9.
4868     OptionalConsent : 8.
4869     OptionalConsentDate : date9.
4870     OptionalConsentVerDate : date9.
4871     SemenSample : 8.
4872     STDINV : 8.
4873     UrineSampleCollection : 8.
4874     ;
4875     FORMAT
4876     BiopsyTissue Q1X.
4877     BloodSampleCollection Q1X.
4878     Consent Q1X.
4879     ConsentDate dates3m9.
4880     ELIGConfirm dates3m9.
4881     HighGradeCancerRisk Q41X.
4882     ICFDate dates3m9.
4883     OptionalConsent Q1X.
4884     OptionalConsentDate dates3m9.
4885     OptionalConsentVerDate dates3m9.
4886     UrineSampleCollection Q1X.
4887     ;
4888     LABEL
4889     PID = 'Patient ID'
```

```
4890 PINIT = 'Patient Initials'
4891 CentreCode = 'Centre Code'
4892 CentreName = 'Centre Name'
4893 BiopsyTissue = 'BiopsyTissue'
4894 BloodSampleCollection = 'BloodSampleCollection'
4895 Consent = 'Consent'
4896 ConsentDate = 'ConsentDate'
4897 ELIGConfirm = 'ELIGConfirm'
4898 HighGradeCancerRisk = 'HighGradeCancerRisk'
4899 ICFDate = 'ICFDate'
4900 OptionalConsent = 'OptionalConsent'
4901 OptionalConsentDate = 'OptionalConsentDate'
4902 OptionalConsentVerDate = 'OptionalConsentVerDate'
4903 SemenSample = 'SemenSample'
4904 STDINV = 'STDINV'
4905 UrineSampleCollection = 'UrineSampleCollection';
4906 RUN;
```

NOTE: The infile "W:/OCOG/PRECISION/data/May 2020/IRIS\_QUESTIONS.dat" is:  
Filename=W:\OCOG\PRECISION\data\May 2020\IRIS\_QUESTIONS.dat,  
RECFM=V,LRECL=295,File Size (bytes)=62398,  
Last Modified=07May2020:11:51:49,  
Create Time=07May2020:11:51:49

NOTE: 0 records were read from the infile "W:/OCOG/PRECISION/data/May 2020/IRIS\_QUESTIONS.dat".

NOTE: There were 0 observations read from the data set CWD.IRIS\_QUESTIONS.

NOTE: The data set WORK.IRIS\_QUESTIONS has 0 observations and 18 variables.

NOTE: DATA statement used (Total process time):

```
real time          0.04 seconds
cpu time           0.04 seconds
```

```
4907 data elig;
4908   set cwd.ELIG;
4909   INFILE "&dir.ELIG_PRECISE.dat" pad DSD DLM='^';
4910   INPUT
4911   InternalID
4912   PID
4913   RegDt : date9.
4914   ConsentDt : date9.
4915   ScreenDt : date9.
4916   CentreCode : $50.
4917   TrtCode TrtDesc : $250.
4918   StratumCode StratumDesc : $250.
4919   EligCriteriaVersion: $250.
4920   EligCriteriaCode : $10.
4921   EligCriteriaAnswer
4922   PatientNAEReason : $250.
4923   PatientNotConsentReason : $250.
4924   EligCriteriaType : $12.
4925   PATCOMMENT : $250.;
4926
4927   FORMAT
4928   RegDt ConsentDt ScreenDt date9.;
4929   RUN;
```

NOTE: The infile "W:/OCOG/PRECISION/data/May 2020/ELIG\_PRECISE.dat" is:  
Filename=W:\OCOG\PRECISION\data\May 2020\ELIG\_PRECISE.dat,  
RECFM=V,LRECL=32767,File Size (bytes)=954843,  
Last Modified=07May2020:11:51:49,

Create Time=07May2020:11:51:49

NOTE: 4983 records were read from the infile "W:/OCOG/PRECISION/data/May 2020/ELIG\_PRECISE.dat".

The minimum record length was 175.

The maximum record length was 203.

NOTE: There were 4983 observations read from the data set CWD.ELIG.

NOTE: The data set WORK.ELIG has 4983 observations and 17 variables.

NOTE: DATA statement used (Total process time):

real time 0.95 seconds

cpu time 0.57 seconds

```
4930
4931 **** CONSORT INFORMATION ****;
4932 /*
4933 proc sort data=elig;
4934     by pid;
4935 run;
4936 data temp;
4937     set elig;
4938     by pid;
4939     if first.pid;
4940 run;
4941 proc freq data=elig;
4942     tables pid;
4943 run;
4944 proc freq data=elig;
4945     tables EligCriteriaType*EligCriteriaCode*EligCriteriaAnswer / list
missprint;
4946 run;
4947 /*
4948
4949 **** DATA EXTRACTION ****;
4950
4951 proc sort data=dpe; by pid;
```

NOTE: There were 453 observations read from the data set WORK.DPE.

NOTE: The data set WORK.DPE has 453 observations and 41 variables.

NOTE: PROCEDURE SORT used (Total process time):

real time 0.03 seconds

cpu time 0.03 seconds

```
4952 proc sort data=eos; by pid;
```

NOTE: There were 246 observations read from the data set WORK.EOS.

NOTE: The data set WORK.EOS has 246 observations and 23 variables.

NOTE: PROCEDURE SORT used (Total process time):

real time 0.03 seconds

cpu time 0.01 seconds

```
4953 data dpel;
4954     merge dpe eos (keep=pid pinit trtcode trtdesc stratumcode
stratumdesc regdate centrecode centrename
4955         rename=(PINIT=p1 TrtCode=t1 TrtDesc=d1 StratumCode=s1
StratumDesc=sd1 RegDate=r1 CentreCode=c1 CentreName=cn1));
4956     by pid;
4957     if pid=1042095 then do; PINIT=p1; TrtCode=t1; TrtDesc=d1;
StratumCode=s1; StratumDesc=sd1; RegDate=r1;
```

```
4957! CentreCode=c1; CentreName=cn1; end;
4958   drop p1 t1 d1 s1 sd1 r1 c1 cn1;
4959   run;
```

```
NOTE: There were 453 observations read from the data set WORK.DPE.
NOTE: There were 246 observations read from the data set WORK.EOS.
NOTE: The data set WORK.DPE1 has 453 observations and 41 variables.
NOTE: DATA statement used (Total process time):
      real time           0.06 seconds
      cpu time            0.03 seconds
```

```
4960   data dpe;
4961     set dpel;
4962   run;
```

```
NOTE: There were 453 observations read from the data set WORK.DPE1.
NOTE: The data set WORK.DPE has 453 observations and 41 variables.
NOTE: DATA statement used (Total process time):
      real time           0.04 seconds
      cpu time            0.01 seconds
```

```
4963
4964   data bp1;
4965     set basepsa1;
4966     if priorv1psaresult<=0 then delete;
4967     lp=log(priorv1psaresult);
4968   run;
```

```
NOTE: There were 985 observations read from the data set WORK.BASEPSA1.
NOTE: The data set WORK.BP1 has 970 observations and 20 variables.
NOTE: DATA statement used (Total process time):
      real time           0.03 seconds
      cpu time            0.01 seconds
```

```
4969           /* **** takes a long time ****
4970   ods trace on;
4971   proc sort data=bp1; by pid;
4972   proc glm data=bp1;
4973     by pid;
4974     model lp=priorv1psadate;
4975     ods output parameterestimates=out1;
4976   run;
4977   ods trace off;
4978           */
4979   data death;
4980     set death;
4981     by pid;
4982     if first.pid;
4983   run;
```

```
NOTE: There were 3 observations read from the data set WORK.DEATH.
NOTE: The data set WORK.DEATH has 2 observations and 21 variables.
NOTE: DATA statement used (Total process time):
      real time           0.04 seconds
      cpu time            0.01 seconds
```

```
4984   data psaslopes;
```

```
4985 set cwd2.psaslopes;
```

```
NOTE: Data file CWD2.PSASLOPES.DATA is in a format that is native to  
another host, or the file encoding does not match  
the session encoding. Cross Environment Data Access will be used,  
which might require additional CPU resources and  
might reduce performance.
```

```
4986 where parameter='PriorV1PSADate';  
4987 if estimate>0 then mskccdt=0.693/(estimate*30.45);  
4988 run;
```

```
NOTE: There were 424 observations read from the data set CWD2.PSASLOPES.  
WHERE parameter='PriorV1PSADate';
```

```
NOTE: The data set WORK.PSASLOPES has 424 observations and 9 variables.
```

```
NOTE: DATA statement used (Total process time):  
real time          0.01 seconds  
cpu time           0.01 seconds
```

```
4989 proc sort data=bp1; by pid PriorV1PSADate;
```

```
NOTE: There were 970 observations read from the data set WORK.BP1.
```

```
NOTE: The data set WORK.BP1 has 970 observations and 20 variables.
```

```
NOTE: PROCEDURE SORT used (Total process time):  
real time          0.01 seconds  
cpu time           0.00 seconds
```

```
4990 data psadtb;  
4991 set bp1;  
4992 by pid priorv1PSADate;  
4993 if last.pid;  
4994 run;
```

```
NOTE: There were 970 observations read from the data set WORK.BP1.
```

```
NOTE: The data set WORK.PSADTB has 424 observations and 20 variables.
```

```
NOTE: DATA statement used (Total process time):  
real time          0.03 seconds  
cpu time           0.01 seconds
```

```
4995 data pvolume;  
4996 set cwd2.pvolumel1;  
4997 run;
```

```
NOTE: There were 234 observations read from the data set CWD2.PVOLUME1.
```

```
NOTE: The data set WORK.PVOLUME has 234 observations and 2 variables.
```

```
NOTE: DATA statement used (Total process time):  
real time          0.00 seconds  
cpu time           0.00 seconds
```

```
4998 proc sort data=medhx1; by pid;
```

```
NOTE: There were 1886 observations read from the data set WORK.MEDHX1.
```

```
NOTE: The data set WORK.MEDHX1 has 1886 observations and 22 variables.
```

```
NOTE: PROCEDURE SORT used (Total process time):  
real time          0.04 seconds  
cpu time           0.04 seconds
```

```
4999 data comorbid;
```

```
5000 set medhx1;
5001 retain cardiovascular respiratory gi hepatic gu renal endocrine
musculoskeletal hematologic neurologic
5001! dermatologic immunologic;
5002 by pid;
5003 if first.pid then do; cardiovascular=0; respiratory=0; gi=0;
hepatic=0; gu=0; renal=0; endocrine=0;
5003! musculoskeletal=0;
5004 hematologic=0; neurologic=0; dermatologic=0; immunologic=0; end;
5005 if site=1 then cardiovascular=1;
5006 else if site=2 then respiratory=1;
5007 else if site=3 then gi=1;
5008 else if site=4 then hepatic=1;
5009 else if site=5 then gu=1;
5010 else if site=6 then renal=1;
5011 else if site=7 then endocrine=1;
5012 else if site=8 then musculoskeletal=1;
5013 else if site=9 then hematologic=1;
5014 else if site=10 then neurologic=1;
5015 else if site=11 then dermatologic=1;
5016 else if site=12 then immunologic=1;
5017 if last.pid;
5018 run;
```

NOTE: There were 1886 observations read from the data set WORK.MEDHX1.  
NOTE: The data set WORK.COMORBID has 451 observations and 35 variables.  
NOTE: DATA statement used (Total process time):  
real time 0.04 seconds  
cpu time 0.01 seconds

```
5019
5020 proc sort data=comorbid; by pid;
```

NOTE: There were 451 observations read from the data set WORK.COMORBID.  
NOTE: The data set WORK.COMORBID has 451 observations and 35 variables.  
NOTE: PROCEDURE SORT used (Total process time):  
real time 0.03 seconds  
cpu time 0.03 seconds

```
5021 proc sort data=pvolumes; by pid;
```

NOTE: There were 234 observations read from the data set WORK.PVOLUME.  
NOTE: The data set WORK.PVOLUME has 234 observations and 2 variables.  
NOTE: PROCEDURE SORT used (Total process time):  
real time 0.01 seconds  
cpu time 0.01 seconds

```
5022 proc sort data=basepsa; by pid;
```

NOTE: There were 453 observations read from the data set WORK.BASEPSA.  
NOTE: The data set WORK.BASEPSA has 453 observations and 19 variables.  
NOTE: PROCEDURE SORT used (Total process time):  
real time 0.03 seconds  
cpu time 0.03 seconds

```
5023 proc sort data=psaslopes; by pid;**** PRIOR PSA - FOR VELOCITY ****;
```

NOTE: There were 424 observations read from the data set WORK.PSASLOPES.  
NOTE: The data set WORK.PSASLOPES has 424 observations and 9 variables.  
NOTE: PROCEDURE SORT used (Total process time):  
real time 0.01 seconds  
cpu time 0.01 seconds

5024 proc sort data=psadtb; by pid;

NOTE: There were 424 observations read from the data set WORK.PSADTB.  
NOTE: The data set WORK.PSADTB has 424 observations and 20 variables.  
NOTE: PROCEDURE SORT used (Total process time):  
real time 0.03 seconds  
cpu time 0.03 seconds

5025 proc sort data=dpe; by pid;

NOTE: There were 453 observations read from the data set WORK.DPE.  
NOTE: The data set WORK.DPE has 453 observations and 41 variables.  
NOTE: PROCEDURE SORT used (Total process time):  
real time 0.03 seconds  
cpu time 0.03 seconds

5026 proc sort data=targetedmri; by pid;

NOTE: There were 152 observations read from the data set WORK.TARGETEDMRI.  
NOTE: The data set WORK.TARGETEDMRI has 152 observations and 34 variables.  
NOTE: PROCEDURE SORT used (Total process time):  
real time 0.03 seconds  
cpu time 0.03 seconds

5027 proc sort data=targetedmri1; by pid;

NOTE: There were 889 observations read from the data set WORK.TARGETEDMRI1.  
NOTE: The data set WORK.TARGETEDMRI1 has 889 observations and 39 variables.  
NOTE: PROCEDURE SORT used (Total process time):  
real time 0.06 seconds  
cpu time 0.03 seconds

5028 proc sort data=mrinodce; by pid;

NOTE: There were 273 observations read from the data set WORK.MRINODCE.  
NOTE: The data set WORK.MRINODCE has 273 observations and 73 variables.  
NOTE: PROCEDURE SORT used (Total process time):  
real time 0.04 seconds  
cpu time 0.03 seconds

5029 proc sort data=mridce; by pid;

NOTE: There were 273 observations read from the data set WORK.MRIDCE.  
NOTE: The data set WORK.MRIDCE has 273 observations and 80 variables.  
NOTE: PROCEDURE SORT used (Total process time):  
real time 0.04 seconds  
cpu time 0.03 seconds



```
5030 proc sort data=trus; by pid;
```

```
NOTE: There were 202 observations read from the data set WORK.TRUS.  
NOTE: The data set WORK.TRUS has 202 observations and 118 variables.  
NOTE: PROCEDURE SORT used (Total process time):  
      real time          0.04 seconds  
      cpu time           0.03 seconds
```

```
5031 proc sort data=trus1; by pid;
```

```
NOTE: There were 201 observations read from the data set WORK.TRUS1.  
NOTE: The data set WORK.TRUS1 has 201 observations and 25 variables.  
NOTE: PROCEDURE SORT used (Total process time):  
      real time          0.03 seconds  
      cpu time           0.03 seconds
```

```
5032 proc sort data=treat; by pid;
```

```
NOTE: There were 409 observations read from the data set WORK.TREAT.  
NOTE: The data set WORK.TREAT has 409 observations and 37 variables.  
NOTE: PROCEDURE SORT used (Total process time):  
      real time          0.04 seconds  
      cpu time           0.03 seconds
```

```
5033 proc sort data=eos; by pid;
```

```
NOTE: Input data set is already sorted, no sorting done.  
NOTE: PROCEDURE SORT used (Total process time):  
      real time          0.00 seconds  
      cpu time           0.00 seconds
```

```
5034 proc sort data=death; by pid;  
5035 run;
```

```
NOTE: There were 2 observations read from the data set WORK.DEATH.  
NOTE: The data set WORK.DEATH has 2 observations and 21 variables.  
NOTE: PROCEDURE SORT used (Total process time):  
      real time          0.01 seconds  
      cpu time           0.00 seconds
```

```
5036  
5037 data targetedmriprime;  
5038     set targetedmri;  
5039     where vnum=2;  
5040 run;
```

```
NOTE: There were 136 observations read from the data set WORK.TARGETEDMRI.  
      WHERE vnum=2;  
NOTE: The data set WORK.TARGETEDMRIPRIME has 136 observations and 34  
variables.  
NOTE: DATA statement used (Total process time):  
      real time          0.04 seconds  
      cpu time           0.01 seconds
```

```
5041 data mridcel;
```

```
5042 set mridce;
5043 where vnum=1;
5044 run;
```

NOTE: There were 221 observations read from the data set WORK.MRIDCE.  
WHERE vnum=1;

NOTE: The data set WORK.MRIDCE1 has 221 observations and 80 variables.

NOTE: DATA statement used (Total process time):

```
real time      0.12 seconds
cpu time       0.07 seconds
```

```
5045 data mrinodcel;
5046 set mrinodce;
5047 where vnum=1;
5048 run;
```

NOTE: There were 221 observations read from the data set WORK.MRINODCE.  
WHERE vnum=1;

NOTE: The data set WORK.MRINODCE1 has 221 observations and 73 variables.

NOTE: DATA statement used (Total process time):

```
real time      0.51 seconds
cpu time       0.14 seconds
```

```
5049
5050 **** Baseline Characteristics *****;
5051
5052 data all;
5053 merge basepsa (keep=pid V1PSADate V1PSAResult in=in99) dpe (in=in1)
5054 treat (keep=pid AssessmentDate Result BiopsyResultSpecify
FurtherDiagnosticTest PSA MRI BiopsyTestSpecify Biopsy
5055 ASStartDate ActiveSurveillance RadicalTreatment
RadicalTreatmentSpecify MITSpecifyDetails MITSpecify MIT
5055! HormoneTherapy
5056 HormoneSpecify OthTreatment OthTreatmentSpecify) eos (keep=pid
StudyTerminationDate TypeTermination
5056! EarlyTermination LostFUPSpecify OthEarlyTerminationSpecify)
5057 mridcel (keep=pid vdate ImgQuality ImgQuality_2
T1PiRadsScoreOverall TRUSMRIfusedBiopsy worstpiradsscore
5057! rename=(vdate=mridate worstpiradsscore=dcepirads) in=in6)
5058 mrinodcel (keep=pid mriscandate WorstPiRadsScore OthFindings SI
AP LR Volume in=in4)
5059 targetedmriprime (keep=pid BiopsyDate MRITargetedBiopsyResult
GlobalGleason1 GlobalGleason2 GlobalGleasonScore
5060 TotalCoresSubmitted NumPositiveCores IDCCribriformPattern
in=in5) comorbid (keep=pid cardiovascular
5060! respiratory gi hepatic gu renal
5061 endocrine musculoskeletal hematologic neurologic dermatologic
immunologic)
5062 trus (in=in7) death (keep=pid deathdate) psadtb (keep=pid
PriorV1PSAResult) psaslopes (keep=pid mskccdt) pvolume
5062! ;
5063 by pid;
5064 if in99;
5065 age=(regdate-dob)/365.25;
5066 if pid=1042095 then age=(regdate-'18OCT1959'd)/365.25;
5067 bmi=weight/(height/100*height/100);
bsa=0.007184*Height**0.725*Weight**0.425;
5068 days2biopsy=assessmentdate-regdate;
5069 days2end=studyterminationdate-regdate;
```

```

5070
5071     if trtcode=81 then do; if in4 then imaged=1; if in5 then
biopsied=1; if in6 then mri=1; if in7 then trus=1;
5072     if not in4 && not in6 then noimage=1; if not in5 && not in7 then
nobox=1;
5073     if noimage=. and nobx=. and GlobalGleasonScore>=7 then primary=1;
else if noimage=. and nobx=. and
5073! GlobalGleasonScore<7 then primary=0;
5074     if noimage=. and nobx=. and GlobalGleasonScore=6 then threethree=1;
else if noimage=. and nobx=. and
5074! GlobalGleasonScore ne 6 then threethree=0;
5075     if noimage=. and nobx=. and GlobalGleasonScore<0 then nocancerd=1;
else if noimage=. and nobx=. and
5075! GlobalGleasonScore>=0 then nocancerd=0;
5076     end;
5077     if trtcode=82 then do; if not in7 then nobx=1; if nobx=. and
GlobalGleasonRes>=7 then primary=1; if nobx=. and
5077! GlobalGleasonRes<7 then primary=0;
5078     if nobx=. and GlobalGleasonRes=6 then threethree=1; if nobx=. and
GlobalGleasonRes ne 6 then threethree=0;
5079     if nobx=. and GlobalGleasonRes<0 then nocancerd=1; if nobx=. and
GlobalGleasonRes>=0 then nocancerd=0;
5080     end;
5081     if primary=1 and GlobalGleason1>=4 then fourthree=1; else if
primary>=0 and GlobalGleason1<4 then fourthree=0;
5082     if primary=1 and fourthree=0 then threefour=1; else if primary=0
or (primary=1 and fourthree=1) then threefour=0
5082! ;
5083     if primary=. then ittprimary=0; else ittprimary=primary;
5084     if fourthree=. then ittfourthree=0; else ittfourthree=fourthree;
5085     if threefour=. then ittthreefour=0; else ittthreefour=threefour;
5086     if threethree=. then ittthreethree=0; else
ittthreethree=threethree;
5087     if nocancerd=. then ittnocancerd=0; else ittnocancerd=nocancerd;
5088     if deathdate>. then do; dead=1; survdays=deathdate-regdate; end;
5089     else do; dead=0; survdays=days2end; end;
5090     durnonstudy=StudyTerminationDate-regdate;
5091     if pid=1023038 then earlytermination=8; *** Remained on study, but
refused biopsy ***;
5092     if v1PSAresult<=0 then v1PSAresult=PriorV1PSAResult;
5093     if pid=1042095 then vlpsaresult=6.6;
5094     if size<0 then size=size_2;
5095     if mridate>'01JAN2000'd then do; days2mri=mridate-regdate;
daysmri2bx=biopsydate-mridate; end;
5096     if '01JAN2000'd<'01JAN2000'd then do; days2mri=mriscandate-
regdate;
5096! daysmri2bx=biopsydate-mriscandate; end;
5097     if trtcode=82 then days2biopsy=trusbiopsydate-regdate;
5098     else if trtcode=81 then days2biopsy=biopsydate-regdate;
5099     days2end=studyterminationdate-regdate;
5100     if GlobalGleason1<=0 then do; globalgleason1=0; GlobalGleason2=0;
GlobalGleasonRes=0; globalgleasonscore=0; end;
5101     psadensity=vlpsaresult/volume;
5102     if nobx=. then nobx=0;
5103     if (trtcode=82 and globalgleasonres<=6) or (trtcode=81 and
globalgleasonscore<=6) then clininsignificant=1; else
5103! clininsignificant=0;
5104     if (trtcode=81 and noimage=. and nobx=0 and TRUSMRIIfusedBiopsy=2)
or (trtcode=82 and nobx=0) then pp=1; else pp=0;
5105     if dcepirads<=0 then dcepirads=worstpiradsscore;
5106     if (trtcode=81 and noimage=.) or (trtcode=82 and nobx=0) then

```

```
mitt=1; else mitt=0;
5107   if race=. then race=9;
5108   if familyhistory<0 then familyhistory=3;
5109   if ecog<0 then ecog=0;
5110   if digitalrectalexam<0 then digitalrectalexam=1;
5111   if pid=2026043 then v1PSAresult=4.9;
5112   if pid in (1023101,1039028) then mitt=0;
5113   run;
```

NOTE: Missing values were generated as a result of performing an operation on missing values.

Each place is given by: (Number of times) at (Line):(Column).

```
1 at 5067:13      15 at 5067:21      15 at 5067:51      15 at 5067:58
1 at 5067:65      1 at 5067:72
45 at 5068:29     207 at 5069:32     207 at 5090:35     85 at 5095:83
232 at 5096:94    234 at 5096:125
24 at 5097:48     91 at 5098:51     207 at 5099:32     28 at 5101:25
```

NOTE: There were 453 observations read from the data set WORK.BASEPSA.

NOTE: There were 453 observations read from the data set WORK.DPE.

NOTE: There were 409 observations read from the data set WORK.TREAT.

NOTE: There were 246 observations read from the data set WORK.EOS.

NOTE: There were 221 observations read from the data set WORK.MRIDCE1.

NOTE: There were 221 observations read from the data set WORK.MRINODCE1.

NOTE: There were 136 observations read from the data set WORK.TARGETEDMRIPRIME.

NOTE: There were 451 observations read from the data set WORK.COMORBID.

NOTE: There were 202 observations read from the data set WORK.TRUS.

NOTE: There were 2 observations read from the data set WORK.DEATH.

NOTE: There were 424 observations read from the data set WORK.PSADTB.

NOTE: There were 424 observations read from the data set WORK.PSASLOPES.

NOTE: There were 234 observations read from the data set WORK.PVOLUME.

NOTE: The data set WORK.ALL has 453 observations and 229 variables.

NOTE: DATA statement used (Total process time):

```
real time          0.49 seconds
cpu time           0.21 seconds
```

```
5114
5115   **** Data checking ****;
5116
5117   proc print data=all; where age<0; run;
```

NOTE: Writing HTML Body file: sashtml.htm

NOTE: No observations were selected from data set WORK.ALL.

NOTE: There were 0 observations read from the data set WORK.ALL.

WHERE age<0;

NOTE: PROCEDURE PRINT used (Total process time):

```
real time          4.68 seconds
cpu time           0.28 seconds
```

```
5118   proc print data=all; where height<0 or weight<0; run;
```

NOTE: There were 16 observations read from the data set WORK.ALL.

WHERE (height<0) or (weight<0);

NOTE: PROCEDURE PRINT used (Total process time):

```
real time          1.09 seconds
cpu time           0.51 seconds
```

```
5119   proc print data=all; where bpsystolic<0 or bpdiastolic<0 or
```

```
heartrate<0; run;
```

```
NOTE: There were 16 observations read from the data set WORK.ALL.  
WHERE (bpsystolic<0) or (bpdiastolic<0) or (heartrate<0);
```

```
NOTE: PROCEDURE PRINT used (Total process time):  
real time          0.87 seconds  
cpu time           0.53 seconds
```

```
5120 proc print data=all; where v1PSAresult<0; run;
```

```
NOTE: No observations were selected from data set WORK.ALL.  
NOTE: There were 0 observations read from the data set WORK.ALL.  
WHERE v1PSAresult<0;
```

```
NOTE: PROCEDURE PRINT used (Total process time):  
real time          0.09 seconds  
cpu time           0.07 seconds
```

```
5121  
5122 **** FLOW DIAGRAM ****;  
5123  
5124 proc freq data=all;  
5125     tables trtdesc*(CentreName StratumDesc) / missprint;  
5126 run;
```

```
NOTE: There were 453 observations read from the data set WORK.ALL.  
NOTE: PROCEDURE FREQ used (Total process time):  
real time          0.12 seconds  
cpu time           0.09 seconds
```

```
5127  
5128 proc sort data=all; by trtdesc;
```

```
NOTE: There were 453 observations read from the data set WORK.ALL.  
NOTE: The data set WORK.ALL has 453 observations and 229 variables.  
NOTE: PROCEDURE SORT used (Total process time):  
real time          0.32 seconds  
cpu time           0.09 seconds
```

```
5129 proc freq data=all; **** 1023015 & 1023038 refused biopsy but stayed  
on study - listed as normal termination &  
5129! other ***;  
5130     where trtcode=82 and nobx=1;  
5131     tables  
trtdesc*TRUSBiopsyResult*TypeTermination*EarlyTermination*OthEarlyTerminationSpecif  
y / list missprint;  
5132 run;
```

```
NOTE: There were 24 observations read from the data set WORK.ALL.  
WHERE (trtcode=82) and (nobx=1);  
NOTE: PROCEDURE FREQ used (Total process time):  
real time          0.17 seconds  
cpu time           0.09 seconds
```

```
5133 proc freq data=all;  
5134     where trtcode=82 and nobx=0;  
5135     tables
```

```
trtdesc*TRUSBiopsyResult*GlobalGleason1*GlobalGleason2*GlobalGleasonRes /
list missprint;
5136 run;
```

NOTE: There were 202 observations read from the data set WORK.ALL.  
WHERE (trtcode=82) and (nobx=0);

NOTE: PROCEDURE FREQ used (Total process time):  
real time 0.10 seconds  
cpu time 0.04 seconds

```
5137 proc freq data=all;
5138 where trtcode=81 and noimage=1;
5139 tables
trtdesc*typetermination*earlytermination*OthEarlyTerminationSpecify / list
missprint;
5140 run;
```

NOTE: There were 6 observations read from the data set WORK.ALL.  
WHERE (trtcode=81) and (noimage=1);

NOTE: PROCEDURE FREQ used (Total process time):  
real time 0.10 seconds  
cpu time 0.07 seconds

```
5141 proc freq data=all;
5142 where trtcode=81 and noimage=.;
5143 tables TRUSMRIfusedBiopsy*dcepirads / list missprint;
5144 run;
```

NOTE: There were 221 observations read from the data set WORK.ALL.  
WHERE (trtcode=81) and (noimage=.);

NOTE: PROCEDURE FREQ used (Total process time):  
real time 0.15 seconds  
cpu time 0.04 seconds

```
5145 proc freq data=all; **** 1023101 could not complete due to location
and risk of urethelial injury ***;
5146 **** 1039028 started bx, but could not complete due to
intense rectal pain ****;
5147 where trtcode=81 and noimage=. and nobx=1 and
TRUSMRIfusedBiopsy=2;
5148 tables pid;
5149 run;
```

NOTE: There were 2 observations read from the data set WORK.ALL.  
WHERE (trtcode=81) and (noimage=.) and (nobx=1) and  
(TRUSMRIfusedBiopsy=2);

NOTE: PROCEDURE FREQ used (Total process time):  
real time 0.10 seconds  
cpu time 0.07 seconds

```
5150 proc freq data=all;
5151 where trtcode=81 and noimage=. and nobx=0 and
TRUSMRIfusedBiopsy=2;
5152 tables
trtdesc*MRITargetedBiopsyResult*GlobalGleason1*GlobalGleason2*GlobalGleasonScor
e / list missprint;
5153 run;
```

NOTE: There were 136 observations read from the data set WORK.ALL.  
WHERE (trtcode=81) and (noimage=.) and (nobx=0) and  
(TRUSMRIfusedBiopsy=2);

NOTE: PROCEDURE FREQ used (Total process time):  
real time 0.12 seconds  
cpu time 0.07 seconds

```
5154  
5155 **** Baseline ****;  
5156  
5157 proc sort data=all; by trtdesc;
```

NOTE: Input data set is already sorted, no sorting done.

NOTE: PROCEDURE SORT used (Total process time):  
real time 0.00 seconds  
cpu time 0.00 seconds

```
5158 proc means data=all n mean std median min max ndec=2;  
5159 class trtdesc;  
5160 var age Height Weight BPSystolic BPDiastolic HeartRate vlPSAresult  
bmi bsa mskccdt psadensity volume;  
5161 run;
```

NOTE: There were 453 observations read from the data set WORK.ALL.

NOTE: PROCEDURE MEANS used (Total process time):  
real time 0.15 seconds  
cpu time 0.12 seconds

```
5162 proc freq data=all;  
5163 tables trtdesc*(CentreName StratumDesc Race FamilyHistory ECOG  
DigitalRectalExam PalpableTumour RenalImpairment  
5163! size);  
5164 run;
```

NOTE: There were 453 observations read from the data set WORK.ALL.

NOTE: PROCEDURE FREQ used (Total process time):  
real time 0.18 seconds  
cpu time 0.11 seconds

```
5165 proc means data=all n mean std median min max ndec=2;  
5166 class trtdesc centrename;  
5167 var vlpsaresult;  
5168 run;
```

NOTE: There were 453 observations read from the data set WORK.ALL.

NOTE: PROCEDURE MEANS used (Total process time):  
real time 0.09 seconds  
cpu time 0.04 seconds

```
5169 proc nparlway data=all wilcoxon;  
5170 class centrename;  
5171 var vlpsaresult;  
5172 run;
```

NOTE: There were 453 observations read from the data set WORK.ALL.

NOTE: PROCEDURE NPAR1WAY used (Total process time):  
real time 10.75 seconds  
cpu time 0.60 seconds

5173

5174 \*\*\*\* Primary outcome \*\*\*\*;

5175

5176 proc freq data=all; tables trtdesc\*(primary fourthree threefour  
threethree nocancerd) / riskdiff exact; run;

NOTE: There were 453 observations read from the data set WORK.ALL.

NOTE: PROCEDURE FREQ used (Total process time):

real time 0.46 seconds  
cpu time 0.18 seconds

5177 proc freq data=all; tables trtdesc\*(ittprimary ittfourthree  
ittthreefour ittthreethree ittnocancerd nobx) / riskdiff  
5177! exact; run;

NOTE: There were 453 observations read from the data set WORK.ALL.

NOTE: PROCEDURE FREQ used (Total process time):

real time 0.41 seconds  
cpu time 0.21 seconds

5178 proc freq data=all; where mitt=1; tables trtdesc\*(ittprimary  
ittfourthree ittthreefour ittthreethree ittnocancerd) /  
5178! riskdiff exact; run;

NOTE: There were 421 observations read from the data set WORK.ALL.

WHERE mitt=1;

NOTE: PROCEDURE FREQ used (Total process time):

real time 0.30 seconds  
cpu time 0.15 seconds

5179

5180 proc freq data=all; tables  
trtdesc\*ittprimary\*ittfourthree\*GlobalGleasonScore\*globalgleasonres / list  
missprint; run  
5180! ;

NOTE: There were 453 observations read from the data set WORK.ALL.

NOTE: PROCEDURE FREQ used (Total process time):

real time 0.16 seconds  
cpu time 0.03 seconds

5181 proc freq data=all; tables trtdesc\*dcepirads\*primary; run;

NOTE: There were 453 observations read from the data set WORK.ALL.

NOTE: PROCEDURE FREQ used (Total process time):

real time 0.10 seconds  
cpu time 0.06 seconds

5182 proc freq data=all; tables trtdesc\*dcepirads\*fourthree; run;

NOTE: There were 453 observations read from the data set WORK.ALL.



NOTE: PROCEDURE FREQ used (Total process time):  
real time 0.12 seconds  
cpu time 0.09 seconds

5183 proc freq data=all; tables trtdesc\*dcepirads\*threefour; run;

NOTE: There were 453 observations read from the data set WORK.ALL.  
NOTE: PROCEDURE FREQ used (Total process time):  
real time 0.14 seconds  
cpu time 0.03 seconds

5184 proc freq data=all; tables trtdesc\*dcepirads\*threethree; run;

NOTE: There were 453 observations read from the data set WORK.ALL.  
NOTE: PROCEDURE FREQ used (Total process time):  
real time 0.11 seconds  
cpu time 0.04 seconds

5185  
5186 proc freq data=all; tables trtdesc\*centrename\*TRUSMRIfusedBiopsy /  
chisq; run;

NOTE: There were 453 observations read from the data set WORK.ALL.  
NOTE: PROCEDURE FREQ used (Total process time):  
real time 0.11 seconds  
cpu time 0.03 seconds

5187  
5188 proc sort data=all; by trtdesc;

NOTE: Input data set is already sorted, no sorting done.  
NOTE: PROCEDURE SORT used (Total process time):  
real time 0.00 seconds  
cpu time 0.00 seconds

5189 proc freq data=all; where pp=1; by trtdesc; tables centrename\*primary  
/ chisq; run;

NOTE: There were 338 observations read from the data set WORK.ALL.  
WHERE pp=1;  
NOTE: PROCEDURE FREQ used (Total process time):  
real time 0.12 seconds  
cpu time 0.07 seconds

5190 proc freq data=all; where pp=1; by trtdesc; tables  
centrename\*fourthree / chisq; run;

NOTE: There were 338 observations read from the data set WORK.ALL.  
WHERE pp=1;  
NOTE: PROCEDURE FREQ used (Total process time):  
real time 0.10 seconds  
cpu time 0.06 seconds

5191 proc freq data=all; tables trtdesc\*centrename\*dcepirads / missprint;

run;

NOTE: There were 453 observations read from the data set WORK.ALL.

NOTE: PROCEDURE FREQ used (Total process time):

real time           0.16 seconds  
cpu time            0.11 seconds

5192 proc freq data=all; tables trtdesc\*centrename\*dcepirads\*primary; run;

NOTE: There were 453 observations read from the data set WORK.ALL.

NOTE: PROCEDURE FREQ used (Total process time):

real time           0.21 seconds  
cpu time            0.14 seconds

5193

5194 proc freq data=all; by trtdesc; tables centrename\*primary / chisq;  
run;

NOTE: There were 453 observations read from the data set WORK.ALL.

NOTE: PROCEDURE FREQ used (Total process time):

real time           0.17 seconds  
cpu time            0.07 seconds

5195 proc freq data=all; by trtdesc; tables centrename\*fourthree / chisq;  
run;

NOTE: There were 453 observations read from the data set WORK.ALL.

NOTE: PROCEDURE FREQ used (Total process time):

real time           0.13 seconds  
cpu time            0.09 seconds

5196 proc freq data=all; by trtdesc; tables centrename\*nobx / chisq; run;

NOTE: There were 453 observations read from the data set WORK.ALL.

NOTE: PROCEDURE FREQ used (Total process time):

real time           0.12 seconds  
cpu time            0.06 seconds

5197

5198 \*\*\*\* Secondary Outcomes \*\*\*\*;

5199

5200 proc means data=all n mean std median min max q1 q3;

5201 class trtdesc;

5202 var days2mri daysmri2bx days2biopsy;

5203 run;

NOTE: There were 453 observations read from the data set WORK.ALL.

NOTE: PROCEDURE MEANS used (Total process time):

real time           0.11 seconds  
cpu time            0.06 seconds

5204 proc freq data=all;

5205 where trtcode=82 and nobx=0;

5206 tables

trtdesc\*TRUSBiopsyResult\*GlobalGleason1\*GlobalGleason2\*GlobalGleasonRes /

```
list missprint;
5207 run;
```

NOTE: There were 202 observations read from the data set WORK.ALL.  
WHERE (trtcode=82) and (nobx=0);

NOTE: PROCEDURE FREQ used (Total process time):  
real time 0.11 seconds  
cpu time 0.09 seconds

```
5208 proc freq data=all;
5209 where trtcode=81 and noimage=. and nobx=0 and
TRUSMRIfusedBiopsy=2;
5210 tables
trtdesc*MRITargetedBiopsyResult*GlobalGleason1*GlobalGleason2*GlobalGleasonScor
e / list missprint;
5211 run;
```

NOTE: There were 136 observations read from the data set WORK.ALL.  
WHERE (trtcode=81) and (noimage=.) and (nobx=0) and  
(TRUSMRIfusedBiopsy=2);

NOTE: PROCEDURE FREQ used (Total process time):  
real time 0.12 seconds  
cpu time 0.07 seconds

```
5212
5213 proc freq data=all;
5214 tables trtdesc*(nobx clininsignificant dcepirads
TRUSMRIfusedBiopsy) / exact riskdiff;
5215 run;
```

NOTE: There were 453 observations read from the data set WORK.ALL.

NOTE: PROCEDURE FREQ used (Total process time):  
real time 0.37 seconds  
cpu time 0.12 seconds

```
5216 proc freq data=all;
5217 where pp=1;
5218 tables trtdesc*(clininsignificant) / riskdiff;
5219 run;
```

NOTE: There were 338 observations read from the data set WORK.ALL.

WHERE pp=1;  
NOTE: PROCEDURE FREQ used (Total process time):  
real time 0.09 seconds  
cpu time 0.04 seconds

```
5220 proc freq data=all;
5221 where mitt=1;
5222 tables trtdesc*(clininsignificant nobx) / riskdiff exact;
5223 run;
```

NOTE: There were 421 observations read from the data set WORK.ALL.  
WHERE mitt=1;

NOTE: PROCEDURE FREQ used (Total process time):  
real time 0.25 seconds  
cpu time 0.09 seconds

```
5224
5225 proc sort data=treat; by trtdesc;
```

```
NOTE: There were 409 observations read from the data set WORK.TREAT.
NOTE: The data set WORK.TREAT has 409 observations and 37 variables.
NOTE: PROCEDURE SORT used (Total process time):
      real time           0.08 seconds
      cpu time            0.03 seconds
```

```
5226 proc freq data=treat;
5227     by trtdesc;
5228     tables BiopsyResultSpecify FurtherDiagnosticTest PSA MRI
BiopsyTestSpecify Biopsy ActiveSurveillance
5229         RadicalTreatment RadicalTreatmentSpecify MITSpecifyDetails
MITSpecify MIT HormoneTherapy HormoneSpecify
5230         OthTreatment OthTreatmentSpecify;
5231 run;
```

```
NOTE: There were 409 observations read from the data set WORK.TREAT.
NOTE: PROCEDURE FREQ used (Total process time):
      real time           0.28 seconds
      cpu time            0.15 seconds
```

```
5232 proc print data=death; *** ONLY 2 events ***;
5233 run;
```

```
NOTE: There were 2 observations read from the data set WORK.DEATH.
NOTE: PROCEDURE PRINT used (Total process time):
      real time           0.08 seconds
      cpu time            0.00 seconds
```

```
5234
5235 ***** AE *****;
5236
5237 data ae;
5238     set ae;
5239     if aename='N/A' then aename=Otheraename;
5240     if substr(aename,1,4)='Pain' then aename='Pain';
5241     if substr(aename,1,8)='Discomfo' or substr(aename,1,13) in ('Mild
discomfo','Moderate Disc') then
5241! aename='Discomfort';
5242     if aename in ('Blood in stool','Blood in the stools') then
aename='Hematochezia';
5243     if aename='Blood in the semen' then aename='Hemospermia';
5244     if aename='Blood in the urine' then aename='Hematuria';
5245 run;
```

```
NOTE: There were 607 observations read from the data set WORK.AE.
NOTE: The data set WORK.AE has 607 observations and 29 variables.
NOTE: DATA statement used (Total process time):
      real time           0.06 seconds
      cpu time            0.03 seconds
```

```
5246 proc sort data=ae; by pid AENAME OtherAENAME AESeverity;
5247 run;
```

NOTE: There were 607 observations read from the data set WORK.AE.  
NOTE: The data set WORK.AE has 607 observations and 29 variables.  
NOTE: PROCEDURE SORT used (Total process time):  
real time 0.04 seconds  
cpu time 0.01 seconds

```
5248 proc sort data=ae; by pid;
```

NOTE: Input data set is already sorted, no sorting done.  
NOTE: PROCEDURE SORT used (Total process time):  
real time 0.00 seconds  
cpu time 0.00 seconds

```
5249 proc sort data=all; by pid;
```

NOTE: There were 453 observations read from the data set WORK.ALL.  
NOTE: The data set WORK.ALL has 453 observations and 229 variables.  
NOTE: PROCEDURE SORT used (Total process time):  
real time 0.07 seconds  
cpu time 0.06 seconds

```
5250 data ae2;  
5251 merge ae all (keep=pid pp);  
5252 by pid;  
5253 run;
```

NOTE: There were 607 observations read from the data set WORK.AE.  
NOTE: There were 453 observations read from the data set WORK.ALL.  
NOTE: The data set WORK.AE2 has 826 observations and 30 variables.  
NOTE: DATA statement used (Total process time):  
real time 0.08 seconds  
cpu time 0.03 seconds

```
5254 data ael;  
5255 set ae2;  
5256 by pid aename otherAENAME aeseverity;  
5257 if last.aename;  
5258 run;
```

NOTE: There were 826 observations read from the data set WORK.AE2.  
NOTE: The data set WORK.AE1 has 817 observations and 30 variables.  
NOTE: DATA statement used (Total process time):  
real time 0.07 seconds  
cpu time 0.04 seconds

```
5259 data aepts1;  
5260 set ael;  
5261 by pid;  
5262 if first.pid;  
5263 run;
```

NOTE: There were 817 observations read from the data set WORK.AE1.  
NOTE: The data set WORK.AEPTS1 has 453 observations and 30 variables.  
NOTE: DATA statement used (Total process time):  
real time 0.04 seconds  
cpu time 0.01 seconds

```
5264
5265 proc sort data=ae1;
5266   by trtdesc;
5267 run;
```

NOTE: There were 817 observations read from the data set WORK.AE1.

NOTE: The data set WORK.AE1 has 817 observations and 30 variables.

NOTE: PROCEDURE SORT used (Total process time):

```
real time      0.04 seconds
cpu time       0.01 seconds
```

```
5268 proc freq data=ae1;
5269   by trtdesc;
5270   tables aename / list missprint;
5271 run;
```

NOTE: There were 817 observations read from the data set WORK.AE1.

NOTE: PROCEDURE FREQ used (Total process time):

```
real time      0.21 seconds
cpu time       0.07 seconds
```

```
5272 proc freq data=aepts1;
5273   tables trtdesc / missprint;
5274 run;
```

NOTE: There were 453 observations read from the data set WORK.AEPTS1.

NOTE: PROCEDURE FREQ used (Total process time):

```
real time      0.09 seconds
cpu time       0.00 seconds
```

```
5275 data temp;
5276 input one two three;
5277 datalines;
```

NOTE: The data set WORK.TEMP has 4 observations and 3 variables.

NOTE: DATA statement used (Total process time):

```
real time      0.01 seconds
cpu time       0.01 seconds
```

```
5282 ;
5283 run;
5284 proc freq data=temp;
5285   tables one*two / riskdiff;
5286   weight three;
5287 run;
```

NOTE: There were 4 observations read from the data set WORK.TEMP.

NOTE: PROCEDURE FREQ used (Total process time):

```
real time      0.16 seconds
cpu time       0.06 seconds
```

```
5288 data temp1;
5289 input one two three;
5290 datalines;
```

NOTE: The data set WORK.TEMPL has 4 observations and 3 variables.

NOTE: DATA statement used (Total process time):

|           |              |
|-----------|--------------|
| real time | 0.00 seconds |
| cpu time  | 0.01 seconds |

```
5295 ;
5296 run;
5297 proc freq data=templ;
5298     tables one*two / riskdiff;
5299     weight three;
5300 run;
```

NOTE: There were 4 observations read from the data set WORK.TEMPL.

NOTE: PROCEDURE FREQ used (Total process time):

|           |              |
|-----------|--------------|
| real time | 0.26 seconds |
| cpu time  | 0.04 seconds |

```
5301
5302 ***** Attributable AE *****;
5303
5304 data aeatt;
5305     set ae;
5306     if aerelation>=1;
5307 run;
```

NOTE: There were 607 observations read from the data set WORK.AE.

NOTE: The data set WORK.AEATT has 581 observations and 29 variables.

NOTE: DATA statement used (Total process time):

|           |              |
|-----------|--------------|
| real time | 0.14 seconds |
| cpu time  | 0.03 seconds |

```
5308 proc sort data=aeatt; by pid AENAME OtherAENAME AESeverity;
5309 run;
```

NOTE: There were 581 observations read from the data set WORK.AEATT.

NOTE: The data set WORK.AEATT has 581 observations and 29 variables.

NOTE: PROCEDURE SORT used (Total process time):

|           |              |
|-----------|--------------|
| real time | 0.19 seconds |
| cpu time  | 0.03 seconds |

```
5310 data aeatt1;
5311     set aeatt;
5312     by pid aename otherAENAME aeseverity;
5313     if last.aename;
5314 run;
```

NOTE: There were 581 observations read from the data set WORK.AEATT.

NOTE: The data set WORK.AEATT1 has 574 observations and 29 variables.

NOTE: DATA statement used (Total process time):

|           |              |
|-----------|--------------|
| real time | 0.07 seconds |
| cpu time  | 0.04 seconds |

```
5315 data aeptsatt1;
5316     set aeatt1;
5317     by pid;
```

```
5318   if first.pid;
5319   run;
```

```
NOTE: There were 574 observations read from the data set WORK.AEATT1.
NOTE: The data set WORK.AEPTSATT1 has 228 observations and 29 variables.
NOTE: DATA statement used (Total process time):
      real time           0.04 seconds
      cpu time            0.03 seconds
```

```
5320
5321   proc sort data=aeatt1;
5322     by trtdesc;
5323   run;
```

```
NOTE: There were 574 observations read from the data set WORK.AEATT1.
NOTE: The data set WORK.AEATT1 has 574 observations and 29 variables.
NOTE: PROCEDURE SORT used (Total process time):
      real time           0.03 seconds
      cpu time            0.03 seconds
```

```
5324   proc freq data=aeatt1;
5325     by trtdesc;
5326     tables aename / list missprint;
5327   run;
```

```
NOTE: There were 574 observations read from the data set WORK.AEATT1.
NOTE: PROCEDURE FREQ used (Total process time):
      real time           0.12 seconds
      cpu time            0.04 seconds
```

```
5328   proc freq data=aeptsatt1;
5329     tables trtdesc;
5330   run;
```

```
NOTE: There were 228 observations read from the data set WORK.AEPTSATT1.
NOTE: PROCEDURE FREQ used (Total process time):
      real time           0.07 seconds
      cpu time            0.03 seconds
```

```
5331
5332   ***** Grade 3 or + AE *****;
5333
5334   data aesev;
5335     set ae2;
5336     if aeseverity>=3;
5337   run;
```

```
NOTE: There were 826 observations read from the data set WORK.AE2.
NOTE: The data set WORK.AESEV has 25 observations and 30 variables.
NOTE: DATA statement used (Total process time):
      real time           0.05 seconds
      cpu time            0.03 seconds
```

```
5338   proc sort data=aesev; by pid AENAME OtherAENAME AESeverity;
5339   run;
```



NOTE: There were 25 observations read from the data set WORK.AESEV.  
NOTE: The data set WORK.AESEV has 25 observations and 30 variables.  
NOTE: PROCEDURE SORT used (Total process time):  
real time 0.02 seconds  
cpu time 0.01 seconds

```
5340 data aesev1;  
5341 set aesev;  
5342 by pid aename otherAENAME aeseverity;  
5343 if last.aename;  
5344 run;
```

NOTE: There were 25 observations read from the data set WORK.AESEV.  
NOTE: The data set WORK.AESEV1 has 25 observations and 30 variables.  
NOTE: DATA statement used (Total process time):  
real time 0.05 seconds  
cpu time 0.03 seconds

```
5345 data aeptssev1;  
5346 set aesev1;  
5347 by pid;  
5348 if first.pid;  
5349 run;
```

NOTE: There were 25 observations read from the data set WORK.AESEV1.  
NOTE: The data set WORK.AEPTSSEV1 has 18 observations and 30 variables.  
NOTE: DATA statement used (Total process time):  
real time 0.05 seconds  
cpu time 0.03 seconds

```
5350  
5351 proc sort data=aesev1;  
5352 by trtdesc;  
5353 run;
```

NOTE: There were 25 observations read from the data set WORK.AESEV1.  
NOTE: The data set WORK.AESEV1 has 25 observations and 30 variables.  
NOTE: PROCEDURE SORT used (Total process time):  
real time 0.01 seconds  
cpu time 0.00 seconds

```
5354 proc freq data=aesev1;  
5355 by trtdesc;  
5356 tables aename / list missprint;  
5357 run;
```

NOTE: There were 25 observations read from the data set WORK.AESEV1.  
NOTE: PROCEDURE FREQ used (Total process time):  
real time 0.06 seconds  
cpu time 0.03 seconds

```
5358 proc freq data=aeptssev1;  
5359 tables trtdesc;  
5360 run;
```

NOTE: There were 18 observations read from the data set WORK.AEPTSSEV1.

NOTE: PROCEDURE FREQ used (Total process time):  
real time 0.06 seconds  
cpu time 0.03 seconds

5361  
5362 proc sort data=aepts1; by pid;

NOTE: There were 453 observations read from the data set WORK.AEPTS1.  
NOTE: The data set WORK.AEPTS1 has 453 observations and 30 variables.  
NOTE: PROCEDURE SORT used (Total process time):  
real time 0.03 seconds  
cpu time 0.01 seconds

5363 proc sort data=aeptssev1; by pid;

NOTE: There were 18 observations read from the data set WORK.AEPTSSEV1.  
NOTE: The data set WORK.AEPTSSEV1 has 18 observations and 30 variables.  
NOTE: PROCEDURE SORT used (Total process time):  
real time 0.02 seconds  
cpu time 0.01 seconds

5364 proc sort data=aeptsatt1; by pid;

NOTE: There were 228 observations read from the data set WORK.AEPTSATT1.  
NOTE: The data set WORK.AEPTSATT1 has 228 observations and 29 variables.  
NOTE: PROCEDURE SORT used (Total process time):  
real time 0.03 seconds  
cpu time 0.01 seconds

5365 proc sort data=all; by pid;

NOTE: Input data set is already sorted, no sorting done.  
NOTE: PROCEDURE SORT used (Total process time):  
real time 0.00 seconds  
cpu time 0.00 seconds

5366 data ppae;  
5367 merge aepts1 (in=in1) all (keep=pid pp trtdesc) aeptssev1 (keep=pid  
in=in2) aeptsatt1 (keep=pid in=in3);  
5368 by pid;  
5369 if pp=0 then delete;  
5370 if in1 then ae=1; else ae=0;  
5371 if in2 then sev=1; else sev=0;  
5372 if in3 then att=1; else att=0;  
5373 run;

NOTE: There were 453 observations read from the data set WORK.AEPTS1.  
NOTE: There were 453 observations read from the data set WORK.ALL.  
NOTE: There were 18 observations read from the data set WORK.AEPTSSEV1.  
NOTE: There were 228 observations read from the data set WORK.AEPTSATT1.  
NOTE: The data set WORK.PPAE has 338 observations and 33 variables.  
NOTE: DATA statement used (Total process time):  
real time 0.09 seconds  
cpu time 0.07 seconds

```
5374 proc freq data=ppae;
5375     tables trtdesc*(ae sev att);
5376 run;
```

NOTE: There were 338 observations read from the data set WORK.PPAE.

```
NOTE: PROCEDURE FREQ used (Total process time):
      real time           0.10 seconds
      cpu time            0.03 seconds
```

```
5377 proc sort data=ae1;
5378     by trtdesc;
5379 run;
```

NOTE: Input data set is already sorted, no sorting done.

```
NOTE: PROCEDURE SORT used (Total process time):
      real time           0.00 seconds
      cpu time            0.01 seconds
```

```
5380 proc freq data=ae1;
5381     where pp=1;
5382     by trtdesc;
5383     tables aename / list missprint;
5384 run;
```

NOTE: There were 699 observations read from the data set WORK.AE1.  
WHERE pp=1;

```
NOTE: PROCEDURE FREQ used (Total process time):
      real time           0.12 seconds
      cpu time            0.07 seconds
```

```
5385 proc freq data=aepts1;
5386     where pp=1;
5387     tables trtdesc;
5388 run;
```

NOTE: There were 338 observations read from the data set WORK.AEPTS1.  
WHERE pp=1;

```
NOTE: PROCEDURE FREQ used (Total process time):
      real time           0.05 seconds
      cpu time            0.01 seconds
```

```
5389 proc sort data=aesev1;
5390     by trtdesc;
5391 run;
```

NOTE: Input data set is already sorted, no sorting done.

```
NOTE: PROCEDURE SORT used (Total process time):
      real time           0.00 seconds
      cpu time            0.00 seconds
```

```
5392 proc freq data=aesev1;
5393     by trtdesc;
5394     where pp=1;
5395     tables aename / list missprint;
5396 run;
```

NOTE: There were 19 observations read from the data set WORK.AESEV1.  
WHERE pp=1;

NOTE: PROCEDURE FREQ used (Total process time):  
real time 0.42 seconds  
cpu time 0.06 seconds

```
5397
5398 **** Number of Cores ****;
5399
5400 data temp;
5401 set trus;
5402 if LtLatBaseCancer>=0 then cores=1; else cores=0;
5403 if LtLatMidCancer>=0 then cores=cores+1;
5404 if LtLatApexCancer>=0 then cores=cores+1;
5405 if LtMedBaseCancer>=0 then cores=cores+1;
5406 if LtMedMidCancer>=0 then cores=cores+1;
5407 if LtMedApexCancer>=0 then cores=cores+1;
5408 if RtLatMidCancer>=0 then cores=cores+1;
5409 if RtLatApexCancer>=0 then cores=cores+1;
5410 if RtMedBaseCancer>=0 then cores=cores+1;
5411 if RtMedMidCancer>=0 then cores=cores+1;
5412 if RtMedApexCancer>=0 then cores=cores+1;
5413 if RtLatBaseCancer>=0 then cores=cores+1;
5414 run;
```

NOTE: There were 202 observations read from the data set WORK.TRUS.  
NOTE: The data set WORK.TEMP has 202 observations and 119 variables.

NOTE: DATA statement used (Total process time):  
real time 0.08 seconds  
cpu time 0.04 seconds

```
5415
5416 proc sort data=temp; by pid;
```

NOTE: There were 202 observations read from the data set WORK.TEMP.  
NOTE: The data set WORK.TEMP has 202 observations and 119 variables.

NOTE: PROCEDURE SORT used (Total process time):  
real time 0.05 seconds  
cpu time 0.01 seconds

```
5417 proc sort data=all; by pid;
```

NOTE: Input data set is already sorted, no sorting done.

NOTE: PROCEDURE SORT used (Total process time):  
real time 0.00 seconds  
cpu time 0.00 seconds

```
5418 data cores;
5419 merge temp (keep=pid cores) all;
5420 by pid;
5421 if cores=0 then cores=totalcoressubmitted;
5422 if pp=0 then delete;
5423 if totalcoressubmitted>0 then
perccorespositivesubmitted=numpositivecores/totalcoressubmitted;
5424 if totalcoressubmitted<0 then totalcoressubmitteditt=0; else
totalcoressubmitteditt=totalcoressubmitted;
5425 if cores>0 then perccorespositive=numpositivecores/cores; else
```

```
5425! perccorespositive=numpositivecores/totalcoressubmitteditt;  
5426   if totalcoressubmitteditt>. and perccorespositive=. then  
perccorespositive=0;  
5427   run;
```

NOTE: Missing values were generated as a result of performing an operation on missing values.

Each place is given by: (Number of times) at (Line):(Column).

28 at 5423:76 82 at 5425:53 29 at 5425:100

NOTE: There were 202 observations read from the data set WORK.TEMP.

NOTE: There were 453 observations read from the data set WORK.ALL.

NOTE: The data set WORK.CORES has 338 observations and 233 variables.

NOTE: DATA statement used (Total process time):

```
real time          0.16 seconds  
cpu time           0.07 seconds
```

```
5428   proc freq data=cores;  
5429     tables trtdesc*(cores TotalCoresSubmitted NumPositiveCores);  
5430   run;
```

NOTE: There were 338 observations read from the data set WORK.CORES.

NOTE: PROCEDURE FREQ used (Total process time):

```
real time          0.17 seconds  
cpu time           0.12 seconds
```

```
5431   proc means data=cores n sum mean std median min max;  
5432     class trtdesc;  
5433     var cores TotalCoresSubmitteditt TotalCoresSubmitted  
NumPositiveCores perccorespositive perccorespositivesubmitted  
5433! ;  
5434   run;
```

NOTE: There were 338 observations read from the data set WORK.CORES.

NOTE: PROCEDURE MEANS used (Total process time):

```
real time          0.13 seconds  
cpu time           0.07 seconds
```

```
5435  
5436   **** eq5d questionnaire ****;  
5437  
5438   proc sort data=eq5d; by vnum;
```

NOTE: There were 1095 observations read from the data set WORK.EQ5D.

NOTE: The data set WORK.EQ5D has 1095 observations and 26 variables.

NOTE: PROCEDURE SORT used (Total process time):

```
real time          0.05 seconds  
cpu time           0.03 seconds
```

```
5439   proc freq data=eq5d;  
5440     by vnum vtype;  
5441     tables trtdesc*(Mobility SelfCare UsualActivities PainDiscomfort  
AnxietyDepression) / missprint;  
5442   run;
```

NOTE: There were 1095 observations read from the data set WORK.EQ5D.

NOTE: PROCEDURE FREQ used (Total process time):

```
real time          0.49 seconds
```

cpu time 0.32 seconds

```
5443 proc means data=eq5d n mean std median q1 q3;
5444   by vnum;
5445   class trtdesc;
5446   var stateofhealthscore;
5447 run;
```

NOTE: There were 1095 observations read from the data set WORK.EQ5D.

NOTE: PROCEDURE MEANS used (Total process time):

```
real time      0.10 seconds
cpu time       0.04 seconds
```

```
5448
5449 proc freq data=qimmpb;
5450   tables trtdesc*(Fevers BloodUrine BloodSemen BloodStool
AcuteUrinaryRetention ErectileDysfunction
5451     UrinaryIncontinence UrinaryTractInfection PainBiopsiesTaken) /
missprint;
5452 run;
```

NOTE: There were 339 observations read from the data set WORK.QIMMPB.

NOTE: PROCEDURE FREQ used (Total process time):

```
real time      0.78 seconds
cpu time       0.18 seconds
```

```
5453 proc means data=qimmpb;
5454   class trtdesc;
5455   var discomfort pain;
5456 run;
```

NOTE: There were 339 observations read from the data set WORK.QIMMPB.

NOTE: PROCEDURE MEANS used (Total process time):

```
real time      0.23 seconds
cpu time       0.07 seconds
```

```
5457
5458 proc freq data=q30dpb;
5459   tables trtdesc*(Fevers BloodUrine BloodSemen BloodStool
AcuteUrinaryRetention ErectileDysfunction
5460     UrinaryIncontinence UrinaryTractInfection PainBiopsiesTaken
UnplannedHospitalVisit NumAttendedER
5460! NightsAdmittedInpatient
5461     DaysAdmittedDayWard DaysAdmittedICU CommunityHealthcareVisit
FeltUnwell FeltUnwellSpecifyDays AnotherBiopsy ) /
5461! missprint exact;
5462 run;
```

NOTE: No statistics are computed for TrtDesc \* DaysAdmittedICU since DaysAdmittedICU has less than 2 nonmissing levels.

NOTE: There were 337 observations read from the data set WORK.Q30DPB.

NOTE: PROCEDURE FREQ used (Total process time):

```
real time      0.84 seconds
cpu time       0.43 seconds
```

5463

```
5464 ***** Logistic regression analyses *****;
5465
5466 data regress1;
5467     set all;
5468     where mitt=1 and trtcode=82;
5469     if vlpsaresult>0 then lpsa=log(vlpsaresult);
5470     psadensity10=psadensity*10;
5471 run;
```

NOTE: Missing values were generated as a result of performing an operation on missing values.

Each place is given by: (Number of times) at (Line):(Column).

3 at 5470:26

NOTE: There were 202 observations read from the data set WORK.ALL.

WHERE (mitt=1) and (trtcode=82);

NOTE: The data set WORK.REGRESS1 has 202 observations and 231 variables.

NOTE: DATA statement used (Total process time):

real time 0.14 seconds

cpu time 0.09 seconds

5472

```
5473 proc logistic data=regress1 descending; model ittprimary=age; run;
```

NOTE: PROC LOGISTIC is modeling the probability that ittprimary=1.

NOTE: Convergence criterion (GCONV=1E-8) satisfied.

NOTE: There were 202 observations read from the data set WORK.REGRESS1.

NOTE: PROCEDURE LOGISTIC used (Total process time):

real time 0.11 seconds

cpu time 0.04 seconds

```
5474 proc logistic data=regress1 descending; class stratumdesc(ref=first);
model ittprimary=stratumdesc; run;
```

NOTE: PROC LOGISTIC is modeling the probability that ittprimary=1.

NOTE: Convergence criterion (GCONV=1E-8) satisfied.

NOTE: There were 202 observations read from the data set WORK.REGRESS1.

NOTE: PROCEDURE LOGISTIC used (Total process time):

real time 0.26 seconds

cpu time 0.06 seconds

```
5475 proc logistic data=regress1 descending; model ittprimary=lpsa; run;
```

NOTE: PROC LOGISTIC is modeling the probability that ittprimary=1.

NOTE: Convergence criterion (GCONV=1E-8) satisfied.

NOTE: There were 202 observations read from the data set WORK.REGRESS1.

NOTE: PROCEDURE LOGISTIC used (Total process time):

real time 0.51 seconds

cpu time 0.09 seconds

```
5476 proc logistic data=regress1 descending; model ittprimary=bmi; run;
```

NOTE: PROC LOGISTIC is modeling the probability that ittprimary=1.

NOTE: Convergence criterion (GCONV=1E-8) satisfied.

NOTE: There were 202 observations read from the data set WORK.REGRESS1.

NOTE: PROCEDURE LOGISTIC used (Total process time):

real time 0.14 seconds

cpu time 0.06 seconds

```
5477 proc logistic data=regress1 descending; model ittprimary=volume; run;
```

```
NOTE: PROC LOGISTIC is modeling the probability that ittprimary=1.  
NOTE: Convergence criterion (GCONV=1E-8) satisfied.  
NOTE: There were 202 observations read from the data set WORK.REGRESS1.  
NOTE: PROCEDURE LOGISTIC used (Total process time):  
      real time          0.18 seconds  
      cpu time           0.07 seconds
```

```
5478 proc logistic data=regress1 descending; model  
ittprimary=psadensity10; run;
```

```
NOTE: PROC LOGISTIC is modeling the probability that ittprimary=1.  
NOTE: Convergence criterion (GCONV=1E-8) satisfied.  
NOTE: There were 202 observations read from the data set WORK.REGRESS1.  
NOTE: PROCEDURE LOGISTIC used (Total process time):  
      real time          0.13 seconds  
      cpu time           0.06 seconds
```

```
5479 proc logistic data=regress1 descending; class centrename; model  
ittprimary=centrename; run;
```

```
NOTE: PROC LOGISTIC is modeling the probability that ittprimary=1.  
NOTE: Convergence criterion (GCONV=1E-8) satisfied.  
NOTE: There were 202 observations read from the data set WORK.REGRESS1.  
NOTE: PROCEDURE LOGISTIC used (Total process time):  
      real time          0.12 seconds  
      cpu time           0.09 seconds
```

```
5480 proc logistic data=regress1 descending; class familyhistory; model  
ittprimary=familyhistory; run;
```

```
NOTE: PROC LOGISTIC is modeling the probability that ittprimary=1.  
NOTE: Convergence criterion (GCONV=1E-8) satisfied.  
NOTE: There were 202 observations read from the data set WORK.REGRESS1.  
NOTE: PROCEDURE LOGISTIC used (Total process time):  
      real time          0.13 seconds  
      cpu time           0.09 seconds
```

```
5481 proc logistic data=regress1 descending; class palpabletumour; model  
ittprimary=palpabletumour; run;
```

```
NOTE: PROC LOGISTIC is modeling the probability that ittprimary=1.  
NOTE: Convergence criterion (GCONV=1E-8) satisfied.  
NOTE: There were 202 observations read from the data set WORK.REGRESS1.  
NOTE: PROCEDURE LOGISTIC used (Total process time):  
      real time          0.12 seconds  
      cpu time           0.06 seconds
```

```
5482 proc logistic data=regress1 descending; class size; model  
ittprimary=size; run;
```

```
NOTE: PROC LOGISTIC is modeling the probability that ittprimary=1.  
NOTE: Convergence criterion (GCONV=1E-8) satisfied.
```



NOTE: There were 202 observations read from the data set WORK.REGRESS1.  
NOTE: PROCEDURE LOGISTIC used (Total process time):  
real time 0.14 seconds  
cpu time 0.09 seconds

```
5483 proc logistic data=regress1 descending; class trtdesc(ref=first);  
model ittprimary=trtdesc; run;
```

NOTE: PROC LOGISTIC is modeling the probability that ittprimary=1.  
NOTE: The CLASS variable TrtDesc has only one level: 'Control - Systematic  
trans-rectal ultrasound (TRUS) guided biopsy'.  
NOTE: Convergence criterion (GCONV=1E-8) satisfied.  
NOTE: There were 202 observations read from the data set WORK.REGRESS1.  
NOTE: PROCEDURE LOGISTIC used (Total process time):  
real time 0.13 seconds  
cpu time 0.06 seconds

```
5484  
5485 proc logistic data=regress1 descending;  
5486 class ittprimary stratumdesc centrename familyhistory  
palpabletumour size trtdesc;  
5487 model ittprimary=age stratumdesc lpsa bmi centrename  
familyhistory palpabletumour size trtdesc volume  
5487! psadensity10 / selection=stepwise;  
5488 run;
```

NOTE: PROC LOGISTIC is modeling the probability that ittprimary=1.  
NOTE: The CLASS variable TrtDesc has only one level: 'Control - Systematic  
trans-rectal ultrasound (TRUS) guided biopsy'.  
NOTE: Convergence criterion (GCONV=1E-8) satisfied in Step 0.  
NOTE: Convergence criterion (GCONV=1E-8) satisfied in Step 1.  
NOTE: Convergence criterion (GCONV=1E-8) satisfied in Step 2.  
NOTE: Convergence criterion (GCONV=1E-8) satisfied in Step 3.  
NOTE: Convergence criterion (GCONV=1E-8) satisfied in Step 4.  
NOTE: There were 202 observations read from the data set WORK.REGRESS1.  
NOTE: PROCEDURE LOGISTIC used (Total process time):  
real time 0.38 seconds  
cpu time 0.12 seconds

```
5489 proc logistic data=regress1 descending;  
5490 class ittprimary stratumdesc(ref=first) centrename familyhistory  
palpabletumour size trtdesc;  
5491 model ittprimary=psadensity10 palpabletumour stratumdesc /  
influence iplots;  
5492 run;
```

NOTE: PROC LOGISTIC is modeling the probability that ittprimary=1.  
NOTE: The CLASS variable TrtDesc has only one level: 'Control - Systematic  
trans-rectal ultrasound (TRUS) guided biopsy'.  
NOTE: Convergence criterion (GCONV=1E-8) satisfied.  
NOTE: There were 202 observations read from the data set WORK.REGRESS1.  
NOTE: PROCEDURE LOGISTIC used (Total process time):  
real time 1:02.86  
cpu time 1.73 seconds

```
5493  
5494
```

```
5495 data regress;
5496   set all;
5497   where mitt=1 and trtcode=81;
5498   if vlpsaresult>0 then lpsa=log(vlpsaresult);
5499   psadensity10=psadensity*10;
5500 run;
```

NOTE: Missing values were generated as a result of performing an operation on missing values.

Each place is given by: (Number of times) at (Line):(Column).

3 at 5499:26

NOTE: There were 219 observations read from the data set WORK.ALL.  
WHERE (mitt=1) and (trtcode=81);

NOTE: The data set WORK.REGRESS has 219 observations and 231 variables.

NOTE: DATA statement used (Total process time):

real time                   0.12 seconds

cpu time                    0.09 seconds

```
5501
5502 proc univariate data=regress normal plot;
5503   var lpsa vlpsaresult;
5504 run;
```

NOTE: PROCEDURE UNIVARIATE used (Total process time):

real time                   5.02 seconds

cpu time                    0.35 seconds

```
5505 proc logistic data=regress descending; model ittprimary=age; run;
```

NOTE: PROC LOGISTIC is modeling the probability that ittprimary=1.

NOTE: Convergence criterion (GCONV=1E-8) satisfied.

NOTE: There were 219 observations read from the data set WORK.REGRESS.

NOTE: PROCEDURE LOGISTIC used (Total process time):

real time                   0.11 seconds

cpu time                    0.07 seconds

```
5506 proc logistic data=regress descending; class stratumdesc(ref=first);
model ittprimary=stratumdesc; run;
```

NOTE: PROC LOGISTIC is modeling the probability that ittprimary=1.

NOTE: Convergence criterion (GCONV=1E-8) satisfied.

NOTE: There were 219 observations read from the data set WORK.REGRESS.

NOTE: PROCEDURE LOGISTIC used (Total process time):

real time                   0.13 seconds

cpu time                    0.07 seconds

```
5507 proc logistic data=regress descending; model ittprimary=lpsa; run;
```

NOTE: PROC LOGISTIC is modeling the probability that ittprimary=1.

NOTE: Convergence criterion (GCONV=1E-8) satisfied.

NOTE: There were 219 observations read from the data set WORK.REGRESS.

NOTE: PROCEDURE LOGISTIC used (Total process time):

real time                   0.11 seconds

cpu time                    0.04 seconds

```
5508 proc logistic data=regress descending; model ittprimary=bmi; run;
```

NOTE: PROC LOGISTIC is modeling the probability that ittprimary=1.  
NOTE: Convergence criterion (GCONV=1E-8) satisfied.  
NOTE: There were 219 observations read from the data set WORK.REGRESS.  
NOTE: PROCEDURE LOGISTIC used (Total process time):  
real time 0.20 seconds  
cpu time 0.09 seconds

```
5509 proc logistic data=regress descending; model ittprimary=volume; run;
```

NOTE: PROC LOGISTIC is modeling the probability that ittprimary=1.  
NOTE: Convergence criterion (GCONV=1E-8) satisfied.  
NOTE: There were 219 observations read from the data set WORK.REGRESS.  
NOTE: PROCEDURE LOGISTIC used (Total process time):  
real time 0.12 seconds  
cpu time 0.07 seconds

```
5510 proc logistic data=regress descending; model ittprimary=psadensity10;  
run;
```

NOTE: PROC LOGISTIC is modeling the probability that ittprimary=1.  
NOTE: Convergence criterion (GCONV=1E-8) satisfied.  
NOTE: There were 219 observations read from the data set WORK.REGRESS.  
NOTE: PROCEDURE LOGISTIC used (Total process time):  
real time 0.13 seconds  
cpu time 0.06 seconds

```
5511 proc logistic data=regress descending; class centrename; model  
ittprimary=centrename; run;
```

NOTE: PROC LOGISTIC is modeling the probability that ittprimary=1.  
NOTE: Convergence criterion (GCONV=1E-8) satisfied.  
NOTE: There were 219 observations read from the data set WORK.REGRESS.  
NOTE: PROCEDURE LOGISTIC used (Total process time):  
real time 0.17 seconds  
cpu time 0.04 seconds

```
5512 proc logistic data=regress descending; class familyhistory; model  
ittprimary=familyhistory; run;
```

NOTE: PROC LOGISTIC is modeling the probability that ittprimary=1.  
NOTE: Convergence criterion (GCONV=1E-8) satisfied.  
NOTE: There were 219 observations read from the data set WORK.REGRESS.  
NOTE: PROCEDURE LOGISTIC used (Total process time):  
real time 0.13 seconds  
cpu time 0.09 seconds

```
5513 proc logistic data=regress descending; class palpabletumour; model  
ittprimary=palpabletumour; run;
```

NOTE: PROC LOGISTIC is modeling the probability that ittprimary=1.  
NOTE: Convergence criterion (GCONV=1E-8) satisfied.  
NOTE: There were 219 observations read from the data set WORK.REGRESS.  
NOTE: PROCEDURE LOGISTIC used (Total process time):  
real time 0.12 seconds  
cpu time 0.07 seconds

```
5514 proc logistic data=regress descending; class size; model
ittprimary=size; run;
```

```
NOTE: PROC LOGISTIC is modeling the probability that ittprimary=1.
WARNING: There is possibly a quasi-complete separation of data points. The
maximum likelihood estimate may not exist.
WARNING: The LOGISTIC procedure continues in spite of the above warning.
Results shown are based on the last maximum
      likelihood iteration. Validity of the model fit is questionable.
NOTE: There were 219 observations read from the data set WORK.REGRESS.
NOTE: PROCEDURE LOGISTIC used (Total process time):
      real time          0.23 seconds
      cpu time           0.10 seconds
```

```
5515 proc logistic data=regress descending; class dcepirads; model
ittprimary=dcepirads; run;
```

```
NOTE: PROC LOGISTIC is modeling the probability that ittprimary=1.
WARNING: There is possibly a quasi-complete separation of data points. The
maximum likelihood estimate may not exist.
WARNING: The LOGISTIC procedure continues in spite of the above warning.
Results shown are based on the last maximum
      likelihood iteration. Validity of the model fit is questionable.
NOTE: There were 219 observations read from the data set WORK.REGRESS.
NOTE: PROCEDURE LOGISTIC used (Total process time):
      real time          0.15 seconds
      cpu time           0.07 seconds
```

```
5516
5517 proc logistic data=regress descending;
5518     class ittprimary stratumdesc centrename familyhistory
palpabletumour size;
5519     model ittprimary=age stratumdesc lpsa bmi centrename
familyhistory palpabletumour size volume psadensity10 /
5519! selection=stepwise;
5520 run;
```

```
NOTE: PROC LOGISTIC is modeling the probability that ittprimary=1.
NOTE: Convergence criterion (GCONV=1E-8) satisfied in Step 0.
NOTE: Convergence criterion (GCONV=1E-8) satisfied in Step 1.
NOTE: Convergence criterion (GCONV=1E-8) satisfied in Step 2.
NOTE: Convergence criterion (GCONV=1E-8) satisfied in Step 3.
NOTE: Convergence criterion (GCONV=1E-8) satisfied in Step 4.
NOTE: There were 219 observations read from the data set WORK.REGRESS.
NOTE: PROCEDURE LOGISTIC used (Total process time):
      real time          0.34 seconds
      cpu time           0.15 seconds
```

```
5521 proc logistic data=regress descending;
5522     class ittprimary stratumdesc centrename familyhistory
palpabletumour size trtdesc;
5523     model ittprimary=age psadensity10 palpabletumour bmi / influence
iplots;
5524 run;
```

```
NOTE: PROC LOGISTIC is modeling the probability that ittprimary=1.
```

NOTE: The CLASS variable TrtDesc has only one level: 'Experimental - MP-MRI which, depending on outcome, may be followed by MRI-targeted biopsy'.

NOTE: Convergence criterion (GCONV=1E-8) satisfied.

NOTE: There were 219 observations read from the data set WORK.REGRESS.

NOTE: PROCEDURE LOGISTIC used (Total process time):

|           |              |
|-----------|--------------|
| real time | 1:00.82      |
| cpu time  | 1.54 seconds |

```
5525
5526 data regressall;
5527   set all;
5528   if vlpasareult>0 then lpas=log(vlpasareult);
5529   psadensity10=psadensity*10;
5530 run;
```

NOTE: Missing values were generated as a result of performing an operation on missing values.

Each place is given by: (Number of times) at (Line):(Column).  
28 at 5529:26

NOTE: There were 453 observations read from the data set WORK.ALL.

NOTE: The data set WORK.REGRESSALL has 453 observations and 231 variables.

NOTE: DATA statement used (Total process time):

|           |              |
|-----------|--------------|
| real time | 0.12 seconds |
| cpu time  | 0.07 seconds |

```
5531 proc logistic data=regressall descending;
5532   class ittprimary stratumdesc centrename trtdesc(ref=first);
5533   model ittprimary=stratumdesc centrename trtdesc;
5534 run;
```

NOTE: PROC LOGISTIC is modeling the probability that ittprimary=1.

NOTE: Convergence criterion (GCONV=1E-8) satisfied.

NOTE: There were 453 observations read from the data set WORK.REGRESSALL.

NOTE: PROCEDURE LOGISTIC used (Total process time):

|           |              |
|-----------|--------------|
| real time | 0.14 seconds |
| cpu time  | 0.07 seconds |

```
5535 proc logistic data=regressall descending;
5536   class ittprimary stratumdesc centrename trtdesc(ref=first);
5537   model ittfourthree=stratumdesc centrename trtdesc;
5538 run;
```

NOTE: PROC LOGISTIC is modeling the probability that ittfourthree=1.

NOTE: Convergence criterion (GCONV=1E-8) satisfied.

NOTE: There were 453 observations read from the data set WORK.REGRESSALL.

NOTE: PROCEDURE LOGISTIC used (Total process time):

|           |              |
|-----------|--------------|
| real time | 0.14 seconds |
| cpu time  | 0.09 seconds |

```
5539
5540 **** Lesion by lesion analysis ****;
5541
5542 proc sort data=targetedmri1; by pid;
```

NOTE: Input data set is already sorted, no sorting done.

NOTE: PROCEDURE SORT used (Total process time):

```
real time          0.00 seconds
cpu time           0.01 seconds
```

```
5543 data mribx;
5544   set targetedmri1;
5545   retain one two three;
5546   by pid;
5547   if first.pid then do; one=.; two=.; three=.; end;
5548   if gleasonscore in (6,8,9,10) then gs=gleasonscore*10;
5549   else if gleasonscore=7 then do; if gleason1=4 and gleason2=3 then
gs=75;
5550       else if gleason1=3 and gleason2=4 then gs=65; end;
5551   if targetnum in (1,2,3,4) and gs>one then one=gs;
5552   if targetnum in (5,6,7,8) and gs>two then two=gs;
5553   if targetnum in (9,10,11,12) and gs>three then three=gs;
5554   if last.pid;
5555 run;
```

NOTE: There were 889 observations read from the data set WORK.TARGETEDMRI1.

NOTE: The data set WORK.MRIBX has 151 observations and 43 variables.

NOTE: DATA statement used (Total process time):

```
real time          0.05 seconds
cpu time           0.00 seconds
```

```
5556
5557 proc sort data=mridcel; by pid;
```

NOTE: There were 221 observations read from the data set WORK.MRIDCE1.

NOTE: The data set WORK.MRIDCE1 has 221 observations and 80 variables.

NOTE: PROCEDURE SORT used (Total process time):

```
real time          0.04 seconds
cpu time           0.00 seconds
```

```
5558 proc sort data=mrinodcel; by pid;
```

NOTE: There were 221 observations read from the data set WORK.MRINODCE1.

NOTE: The data set WORK.MRINODCE1 has 221 observations and 73 variables.

NOTE: PROCEDURE SORT used (Total process time):

```
real time          0.03 seconds
cpu time           0.01 seconds
```

```
5559 proc sort data=mribx; by pid;
```

NOTE: There were 151 observations read from the data set WORK.MRIBX.

NOTE: The data set WORK.MRIBX has 151 observations and 43 variables.

NOTE: PROCEDURE SORT used (Total process time):

```
real time          0.02 seconds
cpu time           0.01 seconds
```

```
5560 data lesions;
5561   merge mridcel (keep=pid TRUSMRIfusedBiopsy numtumorsites
T1ChangeFromP1 T2ChangeFromP1 T3ChangeFromP1
5561! T1PiRadsScoreOverall T2PiRadsScoreOverall T3PiRadsScoreOverall)
5562   mrinodcel (keep=pid T1PiRadsScoreOverall T2PiRadsScoreOverall
T3PiRadsScoreOverall
5563   rename=(T1PiRadsScoreOverall=t1no T2PiRadsScoreOverall=t2no
```

```

T3PiRadsScoreOverall=t3no))
5564     mribx (keep=pid one two three);
5565     by pid;
5566     if T1ChangeFromP1=2 then pi1=T1PiRadsScoreOverall;
5567     else pi1=T1no;
5568     if T2ChangeFromP1=2 then pi2=T2PiRadsScoreOverall;
5569     else pi2=T2no;
5570     if T3ChangeFromP1=2 then pi3=T3PiRadsScoreOverall;
5571     else pi3=T3no;
5572     if pid=1039014 then numtumorsites=2;
5573     if numtumorsites=1 then do; pi2=.; pi3=.; end;
5574     if numtumorsites=2 then pi3=.;
5575     if pid=1023101 then do; one=999; two=999; end;
5576     if pid=1039028 then one=999;   *** These two patients could not
undergo biopsy ****;
5577     run;

```

```

NOTE: There were 221 observations read from the data set WORK.MRIDCE1.
NOTE: There were 221 observations read from the data set WORK.MRINODCE1.
NOTE: There were 151 observations read from the data set WORK.MRIBX.
NOTE: The data set WORK.LESIONS has 232 observations and 18 variables.
NOTE: DATA statement used (Total process time):
      real time           0.04 seconds
      cpu time            0.03 seconds

```

```

5578     proc freq data=lesions;
5579         tables numtumorsites / list missprint;
5580     run;

```

```

NOTE: There were 232 observations read from the data set WORK.LESIONS.
NOTE: PROCEDURE FREQ used (Total process time):
      real time           0.38 seconds
      cpu time            0.04 seconds

```

```

5581     data temp;
5582         set lesions;
5583         if numtumorsites<=0 then delete;
5584     run;

```

```

NOTE: There were 232 observations read from the data set WORK.LESIONS.
NOTE: The data set WORK.TEMP has 138 observations and 18 variables.
NOTE: DATA statement used (Total process time):
      real time           0.03 seconds
      cpu time            0.03 seconds

```

```

5585     proc sort data=lesions; by pid;

```

```

NOTE: There were 232 observations read from the data set WORK.LESIONS.
NOTE: The data set WORK.LESIONS has 232 observations and 18 variables.
NOTE: PROCEDURE SORT used (Total process time):
      real time           0.01 seconds
      cpu time            0.00 seconds

```

```

5586     data score;
5587         set lesions (keep=pid numtumorsites pi1 one) lesions (keep=pid
numtumorsites pi2 two rename=(pi2=pi1 two=one))
5587! lesions (keep=pid numtumorsites pi3 three rename=(pi3=pi1

```

```
three=one));  
5588     if numtumorsites<=0 or pil=. then delete;  
5589     if one<0 then one=0;  
5590     run;
```

```
NOTE: There were 232 observations read from the data set WORK.LESIONS.  
NOTE: There were 232 observations read from the data set WORK.LESIONS.  
NOTE: There were 232 observations read from the data set WORK.LESIONS.  
NOTE: The data set WORK.SCORE has 208 observations and 4 variables.  
NOTE: DATA statement used (Total process time):  
      real time           0.01 seconds  
      cpu time            0.01 seconds
```

```
5591     proc freq data=score;  
5592         tables pil pil*one / missprint;  
5593     run;
```

```
NOTE: There were 208 observations read from the data set WORK.SCORE.  
NOTE: PROCEDURE FREQ used (Total process time):  
      real time           0.11 seconds  
      cpu time            0.04 seconds
```

```
5594     proc print data=score; where pil=. and one>0; run;
```

```
NOTE: No observations were selected from data set WORK.SCORE.  
NOTE: There were 0 observations read from the data set WORK.SCORE.  
      WHERE (pil=.) and (one>0);  
NOTE: PROCEDURE PRINT used (Total process time):  
      real time           0.01 seconds  
      cpu time            0.01 seconds
```

```
5595     proc print data=lesions; where pid in (2024001,2024019); run;
```

```
NOTE: There were 2 observations read from the data set WORK.LESIONS.  
      WHERE pid in (2024001, 2024019);  
NOTE: PROCEDURE PRINT used (Total process time):  
      real time           0.10 seconds  
      cpu time            0.03 seconds
```

```
5596     data path;  
5597         set all (keep=pid centrename GlobalGleason1 GlobalGleason2  
GlobalGleasonRes GlobalGleasonscore); run;
```

```
NOTE: There were 453 observations read from the data set WORK.ALL.  
NOTE: The data set WORK.PATH has 453 observations and 6 variables.  
NOTE: DATA statement used (Total process time):  
      real time           0.02 seconds  
      cpu time            0.03 seconds
```

```
5598  
5599  
5600     ***** Export for correlative studies *****;  
5601  
5602     data correl;  
5603         set all (keep=pid trtdesc trtcode CentreName StratumDesc age Race  
FamilyHistory v1PSAresult volume palpabletumour
```



```

5603! psadensity cardiovascular
5604     respiratory gi hepatic gu renal endocrine musculoskeletal
hematologic neurologic dermatologic immunologic
5604! primary fourthree
5605     threefour threethree nocancerd dcepirads TRUSMRIfusedBiopsy
GlobalGleasonRes GlobalGleasonScore);
5606     if trtcode=82 then do; if GlobalGleasonRes=6 then gg=1; else if
GlobalGleasonRes=7 and fourthree=0 then gg=2;
5607         else if GlobalGleasonRes=7 and fourthree=1 then gg=3; else if
GlobalGleasonRes=8 then gg=4;
5608         else if GlobalGleasonRes=9 then gg=5; else if nocancerd=1
then gg=0; end;
5609     if trtcode=81 then do; if GlobalGleasonScore=6 then gg=1; else if
GlobalGleasonScore=7 and fourthree=0 then gg=2
5609! ;
5610         else if GlobalGleasonScore=7 and fourthree=1 then gg=3; else
if GlobalGleasonScore=8 then gg=4;
5611         else if GlobalGleasonScore=9 then gg=5; else if nocancerd=1
then gg=0; end;
5612     if .<0 then dcepirads=.C;
5613 run;

```

NOTE: There were 453 observations read from the data set WORK.ALL.

NOTE: The data set WORK.CORREL has 453 observations and 34 variables.

NOTE: DATA statement used (Total process time):

```

real time          0.04 seconds
cpu time           0.01 seconds

```

```

5614 data correlout;
5615     set correl (keep=pid trtdesc centrename stratumdesc age Race
FamilyHistory v1PSAresult volume palpabletumour
5615! psadensity cardiovascular
5616     respiratory gi hepatic gu renal endocrine musculoskeletal
hematologic neurologic dermatologic immunologic
5616! dcepirads TRUSMRIfusedBiopsy gg);
5617 run;

```

NOTE: There were 453 observations read from the data set WORK.CORREL.

NOTE: The data set WORK.CORRELOUT has 453 observations and 26 variables.

NOTE: DATA statement used (Total process time):

```

real time          0.04 seconds
cpu time           0.03 seconds

```

```

5618
5619 **** July 2020 ***;
5620
5621 proc freq data=all; tables trtdesc*(IDCCribriformPattern idc) /
missprint; run;

```

NOTE: There were 453 observations read from the data set WORK.ALL.

NOTE: PROCEDURE FREQ used (Total process time):

```

real time          0.11 seconds
cpu time           0.06 seconds

```

```

5622 proc freq data=all; where mitt=1; tables
trtdesc*(IDCCribriformPattern idc) / missprint; run;

```

NOTE: There were 421 observations read from the data set WORK.ALL.

WHERE mitt=1;

NOTE: PROCEDURE FREQ used (Total process time):

|           |              |
|-----------|--------------|
| real time | 0.10 seconds |
| cpu time  | 0.06 seconds |

5623

5624 proc print data=all noobs;

5625 where mitt=1 and IDCCribriformPattern=.C and  
substr(trtdesc,1,1)='E';

5626 var pid trtdesc centrename IDCCribriformPattern WorstPiRadsScore  
BiopsyDate MRITargetedBiopsyResult;

5627 run;

NOTE: There were 13 observations read from the data set WORK.ALL.

WHERE (mitt=1) and (IDCCribriformPattern=.C) and (SUBSTR(trtdesc, 1,  
1)='E');

NOTE: PROCEDURE PRINT used (Total process time):

|           |              |
|-----------|--------------|
| real time | 0.12 seconds |
| cpu time  | 0.04 seconds |

5628 proc print data=all noobs;

5629 where mitt=1 and IDC=.C and substr(trtdesc,1,1)='C';

5630 var pid trtdesc centrename IDC;

5631 run;

NOTE: There were 11 observations read from the data set WORK.ALL.

WHERE (mitt=1) and (IDC=.C) and (SUBSTR(trtdesc, 1, 1)='C');

NOTE: PROCEDURE PRINT used (Total process time):

|           |              |
|-----------|--------------|
| real time | 0.07 seconds |
| cpu time  | 0.04 seconds |

5632

5633 data haiderout;

5634 set all (keep=pid trtdesc centrename stratumdesc Result  
BiopsyResultSpecify dcepirads fourthree GlobalGleasonRes

5634! GlobalGleason1 GlobalGleason2 GlobalGleasonScore mridate);

5635 run;

NOTE: There were 453 observations read from the data set WORK.ALL.

NOTE: The data set WORK.HAIDEROUT has 453 observations and 13 variables.

NOTE: DATA statement used (Total process time):

|           |              |
|-----------|--------------|
| real time | 0.05 seconds |
| cpu time  | 0.03 seconds |
