# Supplementary material
Source: PubMed Central journal article supplement (PMC7863017)
Supplement: jamaoncol-e207589-s003.pdf [file jamaoncol-e207589-s003.pdf]

## Supplemental Online Content

Klotz L, Chin J, Black PC, et al. Comparison of multiparametric magnetic resonance imaging–targeted biopsy with transrectal ultrasonography biopsy for biopsy-naïve men at risk for prostate cancer: a phase 3 randomized clinical trial. *JAMA Oncol*. Published online February 4, 2021. doi:10.1001/jamaoncol.2020.7589

**eTable 1.** Per protocol analysis

**eTable 2.** Quality of life data

**eTable 3.** Between site comparison

This supplemental material has been provided by the authors to give readers additional information about their work.

eTable 1. Per-Protocol Analysis:

Results were similar between the ITT and the per protocol population, however, notably, the lower bound of the 95% one-sided confidence interval was slightly below the pre-determined 5% threshold at -6.2% i. There remains lack of consensus amongst statistical researchers as to the optimal population (ITT or PP) for non-inferiority analyses. It is generally agreed that analyses based on the PP population are more conservative in the event of large amounts of patient withdrawal/non-adherence, however, this could result in measurable or possibly unmeasurable population differences. While only 6.6% of patients were ineligible for the PP population in our study (our sample size assumption was <5%), the rate was much higher in the TRUS-Bx arm (10.6% vs 2.6%) indicating a potential differential bias in the PP populations. Additionally, as the MRI-TB arm had numerically lower rates of  $\geq$ GG2 cancers detected, the use of PP population may result in more similar detection rates (i.e. biasing towards no difference) which would bias the results towards inferiority.

**Outcomes based on all patients who started intervention (either underwent MRI or biopsy) as per protocol, ie excluding those who refused biopsy or withdrew from the study.**

|                                             |           | TRUS-Biopsy | MRI Arm     |
|---------------------------------------------|-----------|-------------|-------------|
| N                                           |           | 202         | 219         |
| GG2 or higher cancer                        | N (%)     | 67 (33)     | 79 (36)     |
| GG3 or higher cancer                        | N (%)     | 25 (12)     | 30 (14)     |
| GG2 cancer                                  | N (%)     | 42 (21)     | 49 (22)     |
| GG1 cancer                                  | N (%)     | 49 (24)     | 23 (10)     |
| No Cancer Detected On Biopsy                | N (%)     | 86 (43)     | 34 (15)     |
| GG1 or no cancer                            | N (%)     | 135 (67)    | 57 (26)     |
| Avoided Biopsy due to MRI                   | N (%)     | -           | 83 (39)     |
| 95% CI                                      |           |             | 32%-45%     |
| <b>Outcomes, of those Undergoing Biopsy</b> |           |             |             |
| N                                           |           | 202         | 136         |
| GG2 or higher cancer                        | N (%)     | 67 (33)     | 79 (58)     |
| GG3 or higher cancer                        | N (%)     | 25 (12)     | 30 (22)     |
| GG2 cancer                                  | N (%)     | 42 (21)     | 49 (36)     |
| GG1 or no cancer                            | N (%)     | 135 (67)    | 57 (42)     |
| GG1 cancer                                  | N (%)     | 49 (24)     | 23 (17)     |
| No cancer Detected on Biopsy                | N (%)     | 86 (43)     | 34 (25)     |
| GG1 Cancer by PI-RADS Score                 | PI-RADS=3 |             | 7/24 (29%)  |
|                                             | 4         |             | 13/82 (16%) |
|                                             | 5         |             | 3/30 (10%)  |
| $\geq$ GG2 Cancer by PI-RADS Score          | PI-RADS=3 |             | 4/24 (16)   |
|                                             | 4         |             | 49/82 (60)  |
|                                             | 5         |             | 26/30 (87)  |
| $\geq$ GG3 Cancer by PI-RADS Score          | PI-RADS=3 |             | 2/24 (8.3%) |
|                                             | 4         |             | 16/82 (19)  |
|                                             | 5         |             | 12/30 (40)  |
| GG2 Cancer by PI-RADS Score                 | PI-RADS=3 |             | 2/24 (8.3%) |
|                                             | 4         |             | 33/82 (40)  |
|                                             | 5         |             | 14/30 (47)  |
| <b>Analysis of Individual Targets</b>       |           |             |             |

|                                                                |                      |                 |                |
|----------------------------------------------------------------|----------------------|-----------------|----------------|
| <b>Number of Tumor Sites Identified by MRI Per Patient</b>     | 0                    |                 | 83 (38)        |
|                                                                | 1                    |                 | 78 (35)        |
|                                                                | 2                    | -               | 50 (23)        |
|                                                                | 3                    |                 | 10 (4.5)       |
|                                                                | Sum                  |                 | 208            |
| <b>PI-RADS Score of Each Lesion (n=208)</b>                    | Missing*             |                 | 1              |
|                                                                | 2                    |                 | 2 (1.0)        |
|                                                                | 3                    |                 | 54 (26)        |
|                                                                | 4                    |                 | 118 (57)       |
|                                                                | 5                    |                 | 33 (16)        |
| <b>Number of Cores Taken Per Patient</b>                       | Mean (sd)            | 11.4 (1.3)      | 6.3 (2.6)      |
| <b>Patients with <math>\geq 1</math> Positive Cores</b>        | N (%)                | 120 (59.4)      | 107 (79)       |
| <b>Number of Positive Cores Per Patient</b>                    | Mean (sd)            | 4.4 (3.0)       | 4.4 (2.4)      |
| <b>Percent of Positive Cores Across All Patients</b>           | n/N (%)              | 527/1433 (36.8) | 466/844 (55.2) |
| <b>Adverse Events, Amongst those Undergoing Biopsy</b>         |                      |                 |                |
| <b>N</b>                                                       |                      | 202             | 136            |
| <b>Number of Patients with <math>\geq 1</math> AE</b>          | N (%)                | 143 (71)        | 80 (59)        |
| <b>Most Frequent AE Experienced</b>                            | Erectile Dysfunction | 8 (4)           | 10 (7)         |
|                                                                | Hematochezia         | 36 (18)         | 22 (16)        |
|                                                                | Hematospermia        | 95 (47)         | 51 (38)        |
|                                                                | Hematuria            | 10 (53)         | 43 (32)        |
|                                                                | Pain                 | 72 (36)         | 34 (25)        |
|                                                                | Prostatitis          | 9 (4)           | 0 (0)          |
|                                                                | Urinary Incontinence | 12 (6)          | 5 (4)          |
| <b>Number of Patients with <math>\geq 1</math> Grade 3+ AE</b> | N (%)                | 9 (4.5)         | 4 (2.9)        |
| <b>Chills</b>                                                  |                      | 1 (0.5)         | 0 (0.0)        |
| <b>Erectile Dysfunction</b>                                    |                      | 0 (0.0)         | 1 (0.7)        |
| <b>Fever</b>                                                   |                      | 1 (0.5)         | 0 (0.0)        |
| <b>Hematuria</b>                                               |                      | 2 (1.0)         | 0 (0.0)        |
| <b>Hematochezia</b>                                            |                      | 0 (0.0)         | 1 (0.7)        |
| <b>Left buccal mucosa-invasive cell carcin.</b>                |                      | 0 (0.0)         | 1 (0.7)        |
| <b>Malignant hyperglycemia</b>                                 |                      | 0 (0.0)         | 1 (0.7)        |
| <b>Metastatic SCC of buccal musosa to lung</b>                 |                      | 0 (0.0)         | 1 (0.7)        |
| <b>Neoplasm</b>                                                |                      | 0 (0.0)         | 1 (0.7)        |
| <b>Pain</b>                                                    |                      | 1 (0.5)         | 0 (0.0)        |
| <b>Prostatitis</b>                                             |                      | 1 (0.5)         | 0 (0.0)        |
| <b>Sepsis</b>                                                  |                      | 3 (1.5)         | 0 (0.0)        |
| <b>Urinary retention</b>                                       |                      | 1 (0.5)         | 0 (0.0)        |
| <b>Urinary tract infection</b>                                 |                      | 2 (1.0)         | 1 (0.7)        |

eTable 2. Quality of Life

| Baseline Characteristics              |                                   | Baseline    |             | Post-Treatment |             |
|---------------------------------------|-----------------------------------|-------------|-------------|----------------|-------------|
| EQ5D                                  |                                   |             |             |                |             |
|                                       |                                   | TRUS-Bx     | MRI         | TRUS-Bx        | MRI         |
| <b>N</b>                              |                                   | 221         | 222         | 167            | 175         |
| <b>Mobility</b>                       | I have no problems                | 187 (85)    | 197 (89)    | 145 (87)       | 151 (86)    |
|                                       | I have slight problems            | 22 (10)     | 18 (8.1)    | 12 (7.2)       | 16 (9.1)    |
|                                       | I have moderate problems          | 9 (4.1)     | 5 (2.3)     | 8 (4.8)        | 6 (3.4)     |
|                                       | I have severe problems            | 3 (1.4)     | 2 (0.9)     | 2 (1.2)        | 2 (1.1)     |
| <b>Self Care</b>                      | I have no problems                | 213 (96)    | 218 (98)    | 162 (97)       | 172 (98)    |
|                                       | I have slight problems            | 6 (2.7)     | 4 (1.8)     | 5 (3.0)        | 3 (1.7)     |
|                                       | I have moderate problems          | 2 (0.9)     | 0           | 0              | 0           |
|                                       | I have severe problems            | 0           | 0           | 0              | 0           |
| <b>Usual Activities</b>               | I have no problems                | 197 (89)    | 205 (92.3)  | 146 (87)       | 160 (91)    |
|                                       | I have slight problems            | 21 (9.5)    | 14 (6.3)    | 11 (6.6)       | 9 (5.1)     |
|                                       | I have moderate problems          | 2 (0.9)     | 3 (1.4)     | 7 (4.2)        | 6 (3.4)     |
|                                       | I have severe problems            | 1 (0.5)     | 0           | 3 (1.8)        | 0           |
| <b>Pain</b>                           | I have no pain                    | 135 (61)    | 135 (61)    | 122 (73)       | 126 (72)    |
|                                       | I have slight pain                | 63 (28)     | 67 (30)     | 30 (18)        | 40 (23)     |
|                                       | I have moderate pain              | 20 (9.1)    | 17 (7.7)    | 12 (7.2)       | 8 (4.6)     |
|                                       | I have severe pain                | 3 (1.4)     | 3 (1.4)     | 2 (1.2)        | 1 (0.6)     |
|                                       | I have extreme pain               | 0           | 0           | 1 (0.6)        | 0           |
| <b>Anxiety/Depression</b>             | I have no anxiety/depressed       | 153 (69)    | 165 (75)    | 107 (64)       | 133 (76)    |
|                                       | I have slight anxiety/depressed   | 53 (24.0)   | 45 (20.4)   | 47 (28)        | 36 (21)     |
|                                       | I have moderate anxiety/depressed | 13 (5.9)    | 10 (4.5)    | 10 (6.0)       | 6 (3.4)     |
|                                       | I have severe anxiety/depressed   | 2 (0.9)     | 1 (0.5)     | 2 (1.2)        | 0           |
|                                       | I have extreme anxiety/depressed  | 0           | 0           | 2 (0.6)        | 0           |
| <b>State of Health</b>                | Mean (sd)                         | 84.5 (11.4) | 85.1 (11.3) | 84.7 (11.9)    | 85.8 (11.2) |
| QIMMB                                 |                                   |             |             |                |             |
|                                       |                                   | TRUS-Bx     | MRI         | TRUS-Bx        | MRI         |
| <b>N</b>                              |                                   | 183         | 124         | 172            | 121         |
| <b>Fevers</b>                         | N (%) Yes                         | 3 (1.6)     | 1 (0.8)     | 7 (4.1)        | 2 (1.7)     |
| <b>Blood in Urine</b>                 | N (%) Yes                         | 3 (1.6)     | 1 (0.8)     | 138 (80)       | 60 (50)     |
| <b>Blood in Semen</b>                 | N (%) Yes                         | 3 (1.6)     | 0 (0.0)     | 119 (70)       | 63 (52)     |
| <b>Blood in Stool</b>                 | N (%) Yes                         | 5 (2.7)     | 1 (0.8)     | 45 (26)        | 29 (24)     |
| <b>Acute Urinary Retention</b>        | N (%) Yes                         | 1 (0.6)     | 2 (1.6)     | 3 (1.7)        | 1 (0.8)     |
| <b>Erectile Dysfunction</b>           | N (%) Yes                         | 35 (19)     | 21 (17)     | 24 (14)        | 18 (15)     |
| <b>Urinary Incontinence</b>           | N (%) Yes                         | 19 (10.4)   | 10 (8.1)    | 24 (14)        | 7 (5.8)     |
| <b>Urinary Tract Infection</b>        | N (%) Yes                         | 1 (0.6)     | 2 (1.6)     | 6 (3.5)        | 1 (0.8)     |
| <b>Pain</b>                           | N (%) Yes                         | 6 (3.3)     | 1 (0.8)     | 59 (34)        | 36 (30)     |
| <b>Discomfort Score</b>               | Mean (sd)                         | 3.8 (2.4)   | 3.0 (2.3)   |                |             |
| <b>Pain Score</b>                     | Mean (sd)                         | 3.0 (2.2)   | 2.5 (2.3)   |                |             |
| <b>Unplanned Hospital Visit</b>       | N (%) Yes                         |             |             | 15 (8.7)       | 4 (3.3)     |
| <b>Attended ER ≥1 Visit</b>           | N (%) Yes                         |             |             | 7 (4.1)        | 2 (1.7)     |
| <b>Admitted as Inpatient ≥1 Night</b> | N (%) Yes                         |             |             | 5 (2.9)        | 2 (1.7)     |
| <b>Admitted Day Ward</b>              | N (%) Yes                         |             |             | 1 (0.6)        | 0 (0.0)     |

|                                                        |                                                                     |  |  |                                           |                                           |
|--------------------------------------------------------|---------------------------------------------------------------------|--|--|-------------------------------------------|-------------------------------------------|
| <b>Admitted to ICU</b>                                 | N (%) Yes                                                           |  |  | 0 (0.0)                                   | 0 (0.0)                                   |
| <b>Community Health Care Visit</b>                     | N (%) Yes                                                           |  |  | 12 (7.0)                                  | 2 (1.7)                                   |
| <b>Felt Unwell</b>                                     | N (%) Yes<br>≥6 days                                                |  |  | 15 (8.9)<br>11 (6.4)                      | 4 (3.3)<br>2 (1.7)                        |
| <b>How Much of a Problem to Undergo Another Biopsy</b> | Not a Problem<br>Minor Problem<br>Moderate Problem<br>Major Problem |  |  | 79 (46)<br>56 (33)<br>23 (13)<br>12 (7.1) | 75 (62)<br>31 (26)<br>11 (9.2)<br>3 (2.5) |

**eTable 3. Between Site Comparison**

|                                                       | London     | Sunnybrook | Jewish General | UHN        | Vancouver  |
|-------------------------------------------------------|------------|------------|----------------|------------|------------|
| <b>MRI Arm</b>                                        |            |            |                |            |            |
| <b>N</b>                                              | 52         | 50         | 30             | 51         | 44         |
| <b>Median Baseline PSA</b>                            | 6.70       | 6.81       | 7.86           | 6.40       | 6.40       |
| <b>N with MRI</b>                                     | 52         | 49         | 29             | 50         | 41         |
| <b>N (%) MRI Result Positive</b>                      | 22 (42)    | 30 (61)    | 24 (83)        | 34 (68)    | 28 (68)    |
| <b>N (%) PI-RADS Score</b>                            |            |            |                |            |            |
| <b>3</b>                                              | 4 (17)     | 4 (8.2)    | 7 (24)         | 9 (18)     | 2 (4.9)    |
| <b>4</b>                                              | 11 (21)    | 19 (39)    | 12 (41)        | 22 (44)    | 18 (44)    |
| <b>5</b>                                              | 7 (13)     | 7 (14)     | 5 (17)         | 3 (6.0)    | 8 (19)     |
| <b>N (%) No Biopsy Recommended</b>                    | 30 (58)    | 29 (39)    | 5 (17)         | 16 (32)    | 13 (32)    |
| <b>GG2 or Higher Cancer (those undergoing biopsy)</b> | 13/21 (62) | 22/29 (76) | 10/24 (42)     | 19/34 (56) | 15/28 (54) |
| <b>GG3 Cancer or Higher (those undergoing biopsy)</b> | 5/21 (24)  | 9/29 (31)  | 4/24 (17)      | 4/34 (12)  | 8/28 (29)  |
| <b>GG2 or Higher Cancer (all patients)</b>            | 13/52 (25) | 22/50 (44) | 10/30 (33)     | 19/51 (37) | 15/44 (34) |
| <b>GG3 Cancer or Higher (all patients)</b>            | 5/52 (9.6) | 9/50 (18)  | 4/30 (13)      | 4/51 (7.8) | 8/44 (18)  |
| <b>GG2 or Higher Cancer, By PI-RADS Score</b>         |            |            |                |            |            |
| <b>3</b>                                              | 1/3 (33)   | 1/3 (33)   | 1/7 (14)       | 1/9 (11)   | 0/2 (0.0)  |
| <b>4</b>                                              | 7/11 (64)  | 15/19 (79) | 4/12 (33)      | 15/22 (68) | 8/18 (44)  |
| <b>5</b>                                              | 5/7 (71)   | 6/7 (86)   | 5/5 (100)      | 3/3 (100)  | 7/8 (87)   |
| <b>TRUS Bx Arm</b>                                    |            |            |                |            |            |
| <b>N</b>                                              | 52         | 49         | 30             | 53         | 42         |
| <b>Median Baseline PSA</b>                            | 5.87       | 5.82       | 6.79           | 5.50       | 7.05       |
| <b>N Undergoing Biopsy</b>                            | 50         | 44         | 25             | 44         | 39         |
| <b>GG2 or Higher Cancer (those undergoing biopsy)</b> | 22 (44)    | 8 (18)     | 14 (56)        | 11 (25)    | 12 (31)    |
| <b>GG3 Cancer or Higher (those undergoing biopsy)</b> | 8 (16)     | 4 (9.1)    | 5 (20)         | 4 (9.1)    | 4 (10)     |
| <b>GG2 or Higher Cancer (all patients)</b>            | 22 (42)    | 8 (16)     | 14 (47)        | 11 (21)    | 4 (29)     |
| <b>GG3 Cancer or Higher (all patients)</b>            | 8 (15)     | 4 (8.2)    | 5 (17)         | 4 (7.5)    | 4 (9.5)    |
