# Supplementary material
Source: PubMed Central journal article supplement (PMC7863017)
Supplement: jamaoncol-e207589-s004.pdf [file jamaoncol-e207589-s004.pdf]

## Data Sharing Statement

Klotz. Comparison of Multiparametric Magnetic Resonance Imaging-Targeted Biopsy With Systematic Transrectal Ultrasonography Biopsy for Biopsy-Naive Men at Risk for Prostate Cancer. *JAMA Oncol.* Published February 04, 2021. doi:10.1001/jamaoncol.2020.7589

### Data

**Data available:** Yes

**Data types:** Deidentified participant data

**How to access data:** Data available upon request from [marlene.kebabdjian@sunnybrook.ca](mailto:marlene.kebabdjian@sunnybrook.ca)

**When available:** With publication

### Supporting Documents

**Document types:** None

### Additional Information

**Who can access the data:** Data will be made available to researchers upon request, subject to approval by the trial steering committee

**Types of analyses:** For any approved purpose

**Mechanisms of data availability:** After approval and with a signed data access agreement.

**Any additional restrictions:** N/A
